# Supplementary material for: iMiRNA-SSF: Improving the Identification of MicroRNA Precursors by Combining Negative Sets with Different Distributions
Source: PubMed Central journal article supplement (PMC4709562; doi:10.1038/srep19062), 2016-01-12
Supplement: srep19062-s1.pdf [file srep19062-s1.pdf]

## **Supplementary Information for**

**iMiRNA-SSF: Improving the Identification of MicroRNA Precursors by  
Combining Negative Sets with Different Distributions**  
Junjie Chen, Xiaolong Wang, and Bin Liu

---

**Supplementary S1. The benchmark dataset  $S$  contains 4666 sequences, which are classified into subset  $S^+$  with 1612 Human pre-microRNAs (positive samples) and subset  $S^-$  with 1612 Xue pseudo miRNAs and 1442 Zou pseudo miRNAs (negative samples).**

---

(1). 1612 Human pre-microRNAs

```
>hsa-let-7c MI0000064
GCAUCCGGGUUGAGGUAGUAGGUUGUAUGGUUUAGAGUUACACCCUGGGAGUUAACUGUACAACC
UUCUAGCUUUCCUUGGAGC
>hsa-let-7d MI0000065
CCUAGGAAGAGGUAGUAGGUUGCAUAGUUUUAGGGCAGGGAUUUUGCCCACAAGGAGGUAACUAU
ACGACCUGCUGCCUUUCUUAGG
>hsa-let-7e MI0000066
CCCGGGCUGAGGUAGGAGGUUGUAUAGUUGAGGAGGACACCCAAGGAGAUCACUAUACGGCCUCC
UAGCUUUCGCCAGG
>hsa-let-7f-1 MI0000067
UCAGAGUGAGGUAGUAGAUUGUAUAGUUGUGGGUAGUGAUUUUACCCUGUUCAGGAGUAACUA
UACAAUCUAUUGCCUCCUGA
>hsa-let-7f-2 MI0000068
UGUGGGAUGAGGUAGUAGAUUGUAUAGUUUUAGGGUCAUACCCAUCUUGGAGUAACUAUACAG
UCUACUGUCUUUCCACG
>hsa-let-7g MI0000433
AGGCUGAGGUAGUAGUUUGUACAGUUUGAGGGUCUAUGAUACCACCCGGUACAGGAGUAACUGU
ACAGGCCACUGCCUUGCCA
>hsa-let-7i MI0000434
CUGGCUGAGGUAGUAGUUUGUGCUGUUGGUCGGGUUGUGACAUUGCCCGCUGUGGAGUAACUGC
GCAAGCUACUGCCUUGCUA
>hsa-mir-1-2 MI0000437
ACCUACUCAGAGUACAUAUCUUCUUUAUGUACCCAUAUGAACAUACAUAUGCUAUGGAAUGUAAAGA
AGUAUGUAUUUUUGGUAGGC
>hsa-mir-7-1 MI0000263
UUGGAUGUUGGCCUAGUUCUGUGUGGAAGACUAGUGAUUUUGUUGUUUUUAGAUAAUAAUCGA
CAACAAAUCACAGUCUGCCAUAUGGCACAGGCCAUGCCUCUACAG
>hsa-mir-7-2 MI0000264
CUGGAUACAGAGUGGACCGGCUGGCCCAUCUGGAAGACUAGUGAUUUUGUUGUUGUCUJACUGC
GCUCAACAACAAAUCCAGUCUACCUAAUGGUGCCAGCCAUCGCA
>hsa-mir-7-3 MI0000265
AGAUUAGAGUGGCUGUGGUCUAGUGCUGUGUGGAAGACUAGUGAUUUUGUUGUUCUGAUGUACUA
CGACAACAAGUCACAGCCGGCCUCAUAGCGCAGACUCCCUUCGAC
>hsa-mir-9-1 MI0000466
CGGGGUUGGUUGUUAUCUUUGGUUAUCUAGCUGUAUGAGUGGUGGAGUCUUAUAAAGCUAGA
UAACCGAAAGUAAAAUAACCCCA
>hsa-mir-9-3 MI0000468
GGAGGCCCGUUUCUCUCUUUGGUUAUCUAGCUGUAUGAGUGCCACAGAGCCGUCAUAAAGCUAGA
UAACCGAAAGUAGAAAUGAUUCUCA
```

---

>hsa-mir-10a MI0000266  
GAUCUGUCUGUCUUCUGUAUAUACCCUGUAGAUCCGAAUUUGUGUAAGGAAUUUUGUGGUCACAA  
AUUCGUAUCUAGGGGAAUAUGUAGUUGACAUA AACACUCCGCUCU

>hsa-mir-10b MI0000267  
CCAGAGGUUGUAACGUUGUCUAUAUAUACCCUGUAGAACCGAAUUUGUGUGGUAUCCGUAUAGUC  
ACAGAUUCGAUUCUAGGGGAAUAUAUGGUCGAUGCAAAAACUUCA

>hsa-mir-15a MI0000069  
CCUUGGAGUAAAGUAGCAGCACAUAAUGGUUUUGUGGAUUUUGAAAAGGUGCAGGCCAUUUGUGC  
UGCCUCAAAAUAACAAGG

>hsa-mir-15b MI0000438  
UUGAGGCCUUAAGUACUGUAGCAGCACAUCAUGGUUUACAUGCUACAGUCAAGAUGCGAAUCAU  
UAUUUGCUGCUCUAGAAAUUUAAGGAAUUCAU

>hsa-mir-16-1 MI0000070  
GUCAGCAGUGCCUUAGCAGCACGUAAAUAUUGGCGUUAAGAUUCUAAAAUUUUCUCCAGUAUUAA  
CUGUGCUGCUGAAGUAAGGUUGAC

>hsa-mir-16-2 MI0000115  
GUUCCACUCUAGCAGCACGUAAAUAUUGGCGUAGUGAAAUAUAUAUUAAACACCAAUAUACUGU  
GCUGCUUUAGUGUGAC

>hsa-mir-17 MI0000071  
GUCAGAAUAAUGUCAAGUGCUUACAGUGCAGGUAGUGAUUUGUGCAUCUACUGCAGUGAAGGCA  
CUUGUAGCAUUAUGGUGAC

>hsa-mir-18a MI0000072  
UGUUCUAAGGUGCAUCUAGUGCAGAUAGUGAAGUAGAUUAGCAUCUACUGCCCUAAGUGCUCCUU  
CUGGCA

>hsa-mir-19a MI0000073  
GCAGUCCUCUGUUAGUUUUGCAUAGUUGCACUACAAGAAGAAUGUAGUUGUGCAAUCUAUGCAA  
AACUGAUGGUGGCCUGC

>hsa-mir-19b-2 MI0000075  
ACAUUGCUCUACUACAAUAGUUUUGCAGGUUUUGCAUUUCAGCGUAUAUAUGUAUAUGUGGCUGUG  
CAAUCCAUGCAAACUGAUUGUGAUAAUGU

>hsa-mir-20a MI0000076  
GUAGCACUAAAGUGCUUAUAGUGCAGGUAGUGUUUAGUUUUCUACUGCAUUAUGAGCACUAAAG  
UACUGC

>hsa-mir-20b MI0001519  
AGUACCAAAGUGCUCAUAGUGCAGGUAGUUUUGGCAUGACUCUACUGUAGUAUGGGCACUCCAG  
UACU

>hsa-mir-21 MI0000077  
UGUCGGGUAGCUUAUCAGACUGAUGUUGACUGUUGAAUCUCAUGGCAACACCAGUCGAUGGGCUG  
UCUGACA

>hsa-mir-22 MI0000078  
GGCUGAGCCGAGUAGUUCUUCAGUGGCAAGCUUUUUGUCCUGACCCAGCUAAAGCUGCCAGUUG  
AAGAACUGUUGCCCUCUGCC

>hsa-mir-23a MI0000079  
GGCCGGCUGGGGUUCCUGGGGAUGGGAUUUGCUUCCUGUCACAAAUCACAUUGCCAGGGAUUUCC

AACCGACC

>hsa-mir-23b MI0000439

CUCAGGUGCUCUGGCUGCUUUGGGUUCUGGCAUGCUGAUUUUGUGACUUAAGAUUAAAAUCACAUU  
GCCAGGGAUUACCACGCAACCACGACCUUGGC

>hsa-mir-23c MI0016010

AGUGACUUUCCAGGUGUCACACAGUGAGUGGCAUAAUCAGAGUACAAUUUGAGUCAUGCCCAUAC  
AUCACAUUGCCAGUGAUUACCCAAGGAAAGUGACG

>hsa-mir-24-2 MI0000081

CUCUGCCUCCCGUGCCUACUGAGCUGAAACACAGUUGGUUUUGUGUACACUGGCUCAGUUCAGCAG  
GAACAGGG

>hsa-mir-25 MI0000082

GGCCAGUGUUAGAGGGCGGAGACUUGGGCAAUUGCUGGACGCUGCCCUGGGCAUUGCACUUGUCU  
CGGUCUGACAGUGCCGGCC

>hsa-mir-26a-1 MI0000083

GUGGCCUCGUUCAAGUAAUCCAGGAUAGGCUGUGCAGGUCCCAAUGGGCCUAUUCUUGGUUACUU  
GCACGGGGACGC

>hsa-mir-26a-2 MI0000750

GGCUGUGGCUGGAUUCAAGUAAUCCAGGAUAGGCUGUUUCAUCUGUGAGGCCUAUUCUUGAUUA  
CUUGUUUCUGGAGGCAGCU

>hsa-mir-26b MI0000084

CCGGGACCCAGUUCAAGUAAUUCAGGAUAGGUUGUGUGCUGUCCAGCCUGUUCUCCAUIACUUGG  
CUCGGGGACCGG

>hsa-mir-27a MI0000085

CUGAGGAGCAGGGCUUAGCUGCUUGUGAGCAGGGUCCACACCAAGUCGUGUUCACAGUGGCUAAG  
UUCGCCCCCAG

>hsa-mir-27b MI0000440

ACCUCUCUAACAAGGUGCAGAGCUUAGCUGAUUGGUGAACAGUGAUUGGUUUCCGCUUUGUUCAC  
AGUGGCUAAGUUCUGCACCUGAAGAGAAGGUG

>hsa-mir-28 MI0000086

GGUCCUUGCCUCAAGGAGCUCACAGUCUAUUGAGUUACCUUUCUGACUUUCCCACUAGAUGUG  
AGCUCUGGAGGGCAGGCACU

>hsa-mir-29b-1 MI0000105

CUUCAGGAAGCUGGUUUCAUUAGGUGGUUUAGAUUUAAAUAGUGAUUGUCUAGCACCAUUGAAA  
UCAGUGUUCUUGGGG

>hsa-mir-29c MI0000735

AUCUCUJACACAGGCUGACCGAUUUCUCCUGGUGUUCAGAGUCUGUUUUUGUCUAGCACCAUUG  
AAAUCGGUUAUGAUGUAGGGGA

>hsa-mir-30b MI0000441

ACCAAGUUUCAGUUCAUGUAAACAUCUACACUCAGCUGUAAUACAUGGAUUGGCUGGGAGGUGG  
AUGUUUACUUCAGCUGACUUGGA

>hsa-mir-30c-1 MI0000736

ACCAUGCUGUAGUGUGUGUAAACAUCUACACUCUCAGCUGUGAGCUCUAAAGGUGGCUGGGAGAGG  
GUUGUUUACUCCUUCUGCCAUGGA

>hsa-mir-30d MI0000255

---

GUUGUUGUAAACAUCCCCGACUGGAAGCUGUAAGACACAGCUAAGCUUUCAGUCAGAUGUUUGCU  
GCUAC

>hsa-mir-30e MI0000749

GGGCAGUCUUUGCUACUGUAAACAUCCUUGACUGGAAGCUGUAAGGUGUUCAGAGGAGCUUUCAG  
UCGGAUGUUUACAGCGGCAGGCUGCCA

>hsa-mir-31 MI0000089

GGAGAGGAGGCAAGAUGCUGGCAUAGCUGUUGAACUGGGAACCUGCUAUGCCAACAUAUUGCCAU  
CUUUC

>hsa-mir-32 MI0000090

GGAGAUUAUUGCACAUUACUAAGUUGCAUGUUGUCACGGCCUCAUGCAAUUUAGUGUGUGUAUA  
UUUUC

>hsa-mir-33a MI0000091

CUGUGGUGCAUUGUAGUUGCAUUGCAUGUUCUGGUGGUACCCAUGCAAUGUUUCCACAGUGCAUC  
ACAG

>hsa-mir-33b MI0003646

GCGGGCGGCCCCGCGGUGCAUUGCUGUUGCAUUGCACGUGUGGAGGCGGGUGCAGUGCCUCGGC  
AGUGCAGCCCGGAGCCGGCCCCUGGCACCAC

>hsa-mir-34a MI0000268

GGCCAGCUGUGAGUGUUUCUUUGGCAGUGUCUUAGCUGGUUGUUGUGAGCAAUAGUAAGGAAGCA  
AUCAGCAAGUAUACUGCCCUAGAAGUGCUGCACGUUGUGGGGCC

>hsa-mir-34b MI0000742

GUGCUCGGUUUGUAGGCAGUGUCAUAGCUGAUUGUACUGUGGUGGUUACAAUCACUAACUCCAC  
UGCCAUCAAAAACAAGGCAC

>hsa-mir-34c MI0000743

AGUCUAGUUACUAGGCAGUGUAGUUAGCUGAUUGCUAUAGUACCAAUCACUAACCACACGGCCA  
GGUAAAAAGAUU

>hsa-mir-92a-1 MI0000093

CUUUCUACACAGGUUGGGAUCGGUUGCAAUGCUGUGUUUCUGUAUGGUAUUGCACUUGUCCCGGC  
CUGUUGAGUUUGG

>hsa-mir-92a-2 MI0000094

UCAUCCUGGGUGGGGAUUUGUUGCAUUAUUGUGUUCUAUAUAAAGUAUUGCACUUGUCCCGGC  
CUGUGGAAGA

>hsa-mir-92b MI0003560

CGGGCCCCGGGCGGGCGGGAGGGACGGGACGCGGUGCAGUGUUGUUUUUUUUUUUUUUUUUUUUUU  
CACUCGUCCCGGCCUCCGGCCCCCCCCGGCCC

>hsa-mir-93 MI0000095

CUGGGGGUCUCAAAGUGCUGUUCGUGCAGGUAGUGGAUUAACCAACCUACUGCUGAGCUAGCAC  
UUCCCGAGCCCCCGG

>hsa-mir-95 MI0000097

AACACAGUGGGCACUCAAUAAAUGUCUGUUGAAUUGAAAUGCGUUACAUAUCAACGGGUUUUUUUU  
GAGCACCCACUCUGUG

>hsa-mir-96 MI0000098

UGGCCGAUUUUGGCACUAGCACAUUUUUGCUUGUGUCUCUCCGCUCUGAGCAAUCAUGUGCAGUG  
CCAAUAUGGGAAA

---

>hsa-mir-98 MI0000100  
AGGAUUCUGCUCAUGCCAGGGUGAGGUAGUAAGUUGUAUUGUUGUGGGGUAGGGAUUAUJAGGCC  
CAAUUAGAAGUAACUAUACAACUACUACUUUCCUGGUGUGUGGCAUAUUA  
>hsa-mir-99a MI0000101  
CCCAUUGGCAUAAACCCGUAGAUCCGAUCUUGUGGUGAAGUGGACCGCACACAAGCUCGCUUCUAUG  
GGUCUGUGUCAGUGUG  
>hsa-mir-99b MI0000746  
GGCACCCACCCGUAGAACCGACCUUGCGGGGCCUUCGCCGCACACAAGCUCGUGUCUGUGGGUCC  
GUGUC  
>hsa-mir-100 MI0000102  
CCUGUUGCCACAAACCCGUAGAUCCGAACUUGUGGUUAUJAGUCCGCACAAGCUUGUAUCUAUAGG  
UAUGUGUCUGUJAGG  
>hsa-mir-101-1 MI0000103  
UGCCCUGGCUCAGUUAUCACAGUGCUGAUGCUGUCUAUUCUAAAGGUACAGUACUGUGAUAAACUG  
AAGGAUGGCA  
>hsa-mir-101-2 MI0000739  
ACUGUCCUUUUUCGGUUAUCAUGGUACCGAUGCUGUAUAUCUGAAAGGUACAGUACUGUGAUAAAC  
UGAAGAAUGGUGGU  
>hsa-mir-103b-1 MI0007261  
UCAUAGCCUGUACAAUGCUGCUUGAUCCAUAUGCAACAAGGCAGCACUGUAAAGAAGCCGA  
>hsa-mir-105-1 MI0000111  
UGUGCAUCGUGGUCAAAGCUCAGACUCCUGUGGUGGCUGCUCUAGCACACGGAUUUUGAGCA  
UGUGCUACGGUGUCUA  
>hsa-mir-106a MI0000113  
CCUUGGCCAUGUAAAAGUGC UUACAGUGCAGGUAGCUUUUUGAGAUCUACUGCAAUGUAAGCACU  
UCUUACAUUACCAUGG  
>hsa-mir-106b MI0000734  
CCUGCCGGGGCUAAAGUGCUGACAGUGCAGAUAGUGGUCCUCUCCGUGCUACCGCACUGUGGGUA  
CUUGCUGCUCCAGCAGG  
>hsa-mir-107 MI0000114  
CUCUCUGCUUUCAGCUUCUUACAGUGUUGCCUUGUGGCAUGGAGUUAAGCAGCAUUGUACAGG  
GCUAUCAAAGCACAGA  
>hsa-mir-122 MI0000442  
CCUUAGCAGAGCUGUGGAGUGUGACAAUGGUGUUUGUGUCUAAACUAUCAAACGCCAUUAUCACA  
CUAAAUAGCUACUGCUAGGC  
>hsa-mir-124-2 MI0000444  
AUCAAGAUUJAGAGGCUCUGCUCUCCGUGUUCACAGCGGACCUUGAUUUAAUGUCAUACAAUUAAG  
GCACGCGGUGAAUGCCAAGAGCGGAGCCUACGGCUGCACUUGAA  
>hsa-mir-125a MI0000469  
UGCCAGUCUCUAGGUCCCUGAGACCCUUUAACCUUGUGAGGACAUCAGGGUCACAGGUGAGGUUC  
UUGGGAGCCUGGCGUCUGGCC  
>hsa-mir-125b-1 MI0000446  
UGCGCUCUCUCAGUCCCUGAGACCCUAACUUGUGAUGUUUACCGUUUAAAUCCACGGGUJAGGC  
UCUUGGGAGCUGCGAGUCGUCU

---

>hsa-mir-125b-2 MI0000470  
ACCAGACUUUUCCUAGUCCCUGAGACCCUAACUUGUGAGGUUUUUAGUAAACAUCACAAGUCAGG  
CUCUUGGGACCUAGGCGGAGGGGA

>hsa-mir-126 MI0000471  
CGCUGGCGACGGGACAUUAUUACUUUUGGUACGCGCUGUGACACUCAAACUCGUACCGUGAGUA  
AUAAUGCGCCGUCCACGGCA

>hsa-mir-127 MI0000472  
UGUGAUCACUGUCUCCAGCCUGCUGAAGCUCAGAGGGCUCUGAUUCAGAAAGAUCAUCGGAUCCG  
UCUGAGCUUGGCUGGUCGGAAGUCUCAUCAUC

>hsa-mir-128-1 MI0000447  
UGAGCUGUUGGAUUCGGGGCCGUAGCACUGUCUGAGAGGUUUACAUUUCUCACAGUGAACCGGUC  
UCUUUUUCAGCUGCUUC

>hsa-mir-128-2 MI0000727  
UGUGCAGUGGGAAGGGGGCCGAUACACUGUACGAGAGUGAGUAGCAGGUCUCACAGUGAACCGG  
UCUCUUUCCCUACUGUGUC

>hsa-mir-129-2 MI0000473  
UGCCCUUCGCGAAUCUUUUUGCGGUCUGGGCUUGCUGUACAUAACUCAAUAGCCGGAAGCCCUUA  
CCCCAAAAGCAUUUGCGGAGGGCG

>hsa-mir-130a MI0000448  
UGCUGCUGGCCAGAGCUCUUUCACAUUGUGCUACUGUCUGCACCUGUCACUAGCAGUGCAAUGU  
UAAAAGGGCAUUGGCCGUGUAGUG

>hsa-mir-130b MI0000748  
GGCCUGCCCGACACUCUUUCCUGUUGCACUACUAUAGGCCCGCUGGGAAGCAGUGCAAUGAUGAA  
AGGGCAUCGGUCAGGUC

>hsa-mir-132 MI0000449  
CCGCCCCGCGUCUCCAGGGCAACCGUGGCUUUCGAUUGUJACUGUGGGAACUGGAGGUAAACAGU  
CUACAGCCAUGGUCGCCCCGCAGCACGCCACGCGC

>hsa-mir-133a-2 MI0000451  
GGGAGCCAAAUGCUUUGCUAGAGCUGGUAAAAUGGAACCAAUCGACUGUCCAAUGGAUUUGGUC  
CCCUUCAACCAGCUGUAGCUGUGCAUUGAUGGCGCCG

>hsa-mir-133b MI0000822  
CCUCAGAAGAAAGAUGCCCCUGCUCUGGCUGGUCAAACGGAACCAAGUCCGUCUUCUGAGAGG  
UUUGGUCCCCUUAACCAGCUACAGCAGGGCUGGCAAUGCCCAGUCCUUGGAGA

>hsa-mir-134 MI0000474  
CAGGGUGUGUGACUGGUUGACCAGAGGGGCAUGCACUGUGUUCACCCUGUGGGCCACCUAGUCAC  
CAACCCUC

>hsa-mir-135a-1 MI0000452  
AGGCCUCGCGUUCUCUAUGGCUUUUUAUUCUAUGUGAUUCUACUGCUCACUCAUAUAGGGAUU  
GGAGCCGUGGCGCACGGCGGGGACA

>hsa-mir-135a-2 MI0000453  
AGAUAAAUUCACUCUAGUGCUUUAUGGCUUUUUAUUCUAUGUGAUAGUAAUAAAGUCUCAUGUA  
GGGAUGGAAGCCAUGAAAUAUUGUGAAAAUCA

>hsa-mir-135b MI0000810  
CACUCUGCUGGGCCUAUGGCUUUUAUUCUAUGUGAUUGCUGUCCCAAACUCAUGUAGGGCUA

---

AAAGCCAUGGGCUACAGUGAGGGGCGAGCUCC  
>hsa-mir-136 MI0000475  
UGAGCCCUCGGAGACUCCAUUUGUUUGAUGAUGGAUUCUUAUGCUCCAUCAUCGUCUCAAUG  
AGUCUUCAGAGGGUUCU  
>hsa-mir-137 MI0000454  
GGUCCUCUGACUCUCUUCGGUGACGGGUUUUCUUGGGUGGAUAAUACGGAUUACGUUGUUUUGC  
UUAAGAAUACGCGUAGUCGAGGAGAGUACCAGCGGCA  
>hsa-mir-138-1 MI0000476  
CCCUGGCAUGGUGUGGGGCGAGCUGGUGUUGUGAAUCAGGCCGUUGCCAAUCAGAGAACGGCU  
ACUUCACAACACCAGGGCCACACCACACUACAGG  
>hsa-mir-138-2 MI0000455  
CGUUGCUGCAGCUGGUGUUGUGAAUCAGGCCGACGAGCAGCGCAUCCUCUUAACCCGGCUAUUUA  
CGACACCAGGGUUGCAUCA  
>hsa-mir-139 MI0000261  
GUGUAUUCUACAGUGCACGUGUCUCCAGUGUGGCUCGGAGGCUGGAGACGCGGCCCGUUGGAGU  
AAC  
>hsa-mir-140 MI0000456  
UGUGUCUCUCUCUGUGUCCUGCCAGUGGUUUUACCCUAUGGUAGGUUACGUCAUGCUGUUCUACC  
ACAGGGUAGAACCACGGACAGGAUACCGGGGCACC  
>hsa-mir-141 MI0000457  
CGGCCGGCCUGGGUCCAUCUCCAGUACAGUGUUGGAUGGUCUAAUUGUGAAGCUCUACACU  
GUCUGGUAAAGAUGGCUCGCCGGUGGGUUC  
>hsa-mir-142 MI0000458  
GACAGUGCAGUCACCCAUAAGUAGAAAGCACUACUACAGCACUGGAGGGUGUAGUGUUUCCUA  
CUUUAUGGAUGAGUGUACUGUG  
>hsa-mir-143 MI0000459  
GCGCAGCGCCUGUCUCCAGCCUGAGGUGCAGUGCUGCAUCUCUGGUCAGUUGGGAGUCUGAGA  
UGAAGCACUGUAGCUCAGGAAGAGAGAAGUUGUUCUGCAGC  
>hsa-mir-144 MI0000460  
UGGGGCCUGGCUGGGAUAUCAUCAUAUACUGUAAGUUUGCGAUGAGACACUACAGUAUAGAUGA  
UGUACUAGUCCGGGCACCCCC  
>hsa-mir-145 MI0000461  
CACCUUGUCCUCACGGUCCAGUUUCCAGGAAUCCCUAGAUGCUAAGAUGGGGAUUCUGGAA  
AUACUGUUCUUGAGGUCAUGGU  
>hsa-mir-146a MI0000477  
CCGAUGUGUAUCCUCAGCUUUGAGAACUGAAUCCAUGGGUUGUGUCAGUGUCAGACCUCUGAAA  
UUCAGUUCUUCAGCUGGGAUAUCUCUGUCAUCGU  
>hsa-mir-146b MI0003129  
CCUGGCACUGAGAACUGAAUCCAUAGGCUGUGAGCUCUAGCAAUGCCCUGUGGACUCAGUUCUG  
GUGCCCGG  
>hsa-mir-147b MI0005544  
UAUAAAUCUAGUGGAAACAUUUCUGCACAACUAGAUCUGGACACCAGUGUGCGGAAAUGCUUC  
UGCUCAUUUUUAGG  
>hsa-mir-148a MI0000253



---

GAGGCAAAGUUCUGAGACACUCCGACUCUGAGUAUGAUAGAAGUCAGUGCACUACAGAACUUUGU  
CUC  
>hsa-mir-148b MI0000811  
CAAGCACGAUUAGCAUUUGAGGUGAAGUUCUGUUUAUACACUCAGGCUGUGGCUCUCUGAAAGUCA  
GUGCAUCACAGAACUUUGUCUCGAAAGCUUUCUA  
>hsa-mir-149 MI0000478  
GCCGGCGCCCGAGCUCUGGCUCCGUGUCUUCACUCCCGUGCUUGUCCGAGGAGGGAGGGAGGGAC  
GGGGGCUGUGCUGGGGCAGCUGGA  
>hsa-mir-150 MI0000479  
CUCCCCAUGGCCUGUCUCCCAACCCUUGUACCAGUGCUGGGCUCAGACCCUGGUACAGGCCUGG  
GGGACAGGGACCUGGGGAC  
>hsa-mir-151a MI0000809  
UUUCCUGCCUCGAGGAGCUCACAGUCUAGUAUGUCUCAUCCCCUACUAGACUGAAGCUCUUUGA  
GGACAGGGAUGGUCAUACUCACCUC  
>hsa-mir-151b MI0003772  
ACCUCUGAUGUGUCAGUCUCUCUUCAGGGCUCCCGAGACACAGAAACAGACACCUGCCCUCGAGG  
AGCUCACAGUCUAGACAAACAAACCCAGGGU  
>hsa-mir-152 MI0000462  
UGUCCCCCGGCCAGGUUCUGUGAUACACUCCGACUCGGGCUCUGGAGCAGUCAGUGCAUGAC  
AGAACUUGGCCCGGAAGGACC  
>hsa-mir-153-1 MI0000463  
CUCACAGCUGCCAGUGUCAUUUUUGUGAUCUGCAGCUAGUAUUCUCACUCCAGUUGCAUAGUCAC  
AAAAGUGAUCAUUGGCAGGUGUGGC  
>hsa-mir-154 MI0000480  
GUGGUACUUGAAGAUAGGUUAUCCGUGUUGCCUUCGCUUUAUUUGUGACGAAUCAUACACGGUUG  
ACCUAUUUUUCAGUACCAA  
>hsa-mir-155 MI0000681  
CUGUUA AUGCUAAUCGUGAUAGGGGUUUUUGCCUCCAACUGACUCCUACAUAUUAGCAUUAACAG  
>hsa-mir-181a-1 MI0000289  
UGAGUUUUGAGGUUGCUUCAGUGAACAUUCAACGCUGUCGGUGAGUUUGGAAUUAAAAUCAAAAC  
CAUCGACCGUUGAUUGUACCCUAUGGCUAACCAUCAUCUACUCCA  
>hsa-mir-181a-2 MI0000269  
AGAAGGGCUAUCAGGCCAGCCUUCAGAGGACUCCAAGGAACAUUCAACGCUGUCGGUGAGUUUGG  
GAUUUGAAAAAACACUGACCGUUGACUGUACCUUGGGGUCCUUA  
>hsa-mir-181b-1 MI0000270  
CCUGUGCAGAGAUUAUUUUUAAAAGGUCACAAUCAACAUAUCAUUGCUGUCGGUGGGUUGAACUG  
UGUGGACAAGCUCACUGAACAAUGAAUGCAACUGUGGCCCCCGCUU  
>hsa-mir-181b-2 MI0000683  
CUGAUGGCUGCACUCAACAUAUCAUUGCUGUCGGUGGGUUUGAGUCUGAAUCAACUCACUGAUCAA  
UGAAUGCAAACUGCGGACCAAACA  
>hsa-mir-181c MI0000271  
CGGAAAAUUUGCCAAGGGUUUGGGGAACAUAACCUUGUCGGUGAGUUUGGGCAGCUCAGGCAA  
ACCAUCGACCGUUGAGUGGACCCUGAGGCCUGGAAUUGCCAUCU  
>hsa-mir-181d MI0003139

GUCCCCUCCCCUAGGCCACAGCCGAGGUCACAAUCAACAUAUCAUUGUUGUCGGUGGGUUGUGAGG  
ACUGAGGCCAGACCCACCGGGGAUGAAUGUCACUGUGGCUGGGCCAGACACGGCUUAAGGGGAA  
UGGGGAC

>hsa-mir-182 MI0000272

GAGCUGCUUGCCUCCCCCGUUUUUGGCAAUGGUAGAACUCACACUGGUGAGGUAACAGGAUCCG  
GUGGUUCUAGACUUGCCAACUAUGGGGCGAGGACUCAGCCGGCAC

>hsa-mir-183 MI0000273

CCGCAGAGUGUGACUCCUGUUCUGUGUAUGGCACUGGUAGAAUUCACUGUGAACAGUCUCAGUCA  
GUGAAUJACCGAAGGGCCAUA AACAGAGCAGAGACAGAUCCACGA

>hsa-mir-184 MI0000481

CCAGUCACGUCCCCUUAUCACUJUJCCAGCCCAGCUUUGUGACUGUAAGUGUUGGACGGAGAACU  
GAUAAGGGUAGGUGAUUGA

>hsa-mir-185 MI0000482

AGGGGGCGAGGGAUUGGAGAGAAAGGCAGUUCUGAUGGUCCCCUCCCCAGGGGCUGGCUJUCCU  
CUGGUCCUCCCCUCCA

>hsa-mir-186 MI0000483

UGCUGUAACUUUCCAAAGAAUUCUCCUUUUGGGCUUUCUGGUUUUAUUUUUAAGCCCAAAGGUGA  
AUUUUUUGGGAAGUUUGAGCU

>hsa-mir-187 MI0000274

GGUCGGGCUCACCAUGACACAGUGUGAGACCUCGGGCUACAACACAGGACCCGGGCGCUGCUCUG  
ACCCUCUGUGUCUUGUGUUGCAGCCGGAGGGACGCAGGUCCGCA

>hsa-mir-188 MI0000484

UGCUCUCCUCUCUCACAUCUCCUUGCAUGGUGGAGGGUGAGCUUUCUGAAAACCCUCCCACAUGCA  
GGGUUUGCAGGAUGGCGAGCC

>hsa-mir-190a MI0000486

UGCAGGCCUCUGUGUGAU AUGUUGAUUAUUAUAGGUUGUUAJUUAUCCAACUAUAUAUCAAACA  
UAUCCUACAGUGUCUUGCC

>hsa-mir-190b MI0005545

UGCUCUGUGUGAU AUGUUGAUUAUUGGGUUGUUUAAUUAAGGAACCAACUAAAUGUCAACAUAU  
UCUUACAGCAGCAG

>hsa-mir-191 MI0000465

CGGCUGGACAGCGGGCAACGGAAUCCAAAAGCAGCUGUUGUCUCCAGAGCAUUCAGCUGCGCU  
UGGAUUUCGUCCCCUGCUCUCCUGCCU

>hsa-mir-192 MI0000234

GCCGAGACCGAGUGCACAGGGCUCUGACCUAUGAAUUGACAGCCAGUGCUCUCGUCUCCCCUCUG  
GCUGCCAAUCCAUAGGUCACAGGUAUGUUCGCCUCA AUGCCAGC

>hsa-mir-193a MI0000487

CGAGGAUGGGAGCUGAGGGCUGGGUCUJUGCGGGCGAGAUGAGGGUGUCGGAUCAACUGGCCUAC  
AAAGUCCAGUUCUCGGCCCCCG

>hsa-mir-193b MI0003137

GUGGUCUCAGAAUCGGGUUUUGAGGGCGAGAUGAGUUUAUGUUUAUCCAACUGGCCCUCAAAG  
UCCCGCUUUUGGGGUCAU

>hsa-mir-194-1 MI0000488

AUGGUGUUAUCAAGUGUAACAGCAACUCCAUGUGGACUGUGUACCAAUUCCAGUGGAGAUGCUG

UUACUUUUGAUGGUUACCAA  
>hsa-mir-194-2 MI0000732  
UGGUUCCCGCCCCUGUAACAGCAACUCCAUGUGGAAGUGCCCACUGGUUCCAGUGGGGCUGCUG  
UUAUCUGGGGCGAGGGCCAG  
>hsa-mir-195 MI0000489  
AGCUUCCUGGCUCUAGCAGCACAGAAAUAUUGGCACAGGGAAGCGAGUCUGCCAAUAUUGGCUG  
UGCUGCUCCAGGCAGGGUGGUG  
>hsa-mir-196a-1 MI0000238  
GUGAAUJAGGUAGUUUCAUGUUGUUGGGCCUGGGUUUCUGAACACAACAACAUUAAACCACCCGA  
UUCAC  
>hsa-mir-196a-2 MI0000279  
UGCUCGCUCAGCUGAUCUGUGGCUJAGGUAGUUUCAUGUUGUUGGGAUUGAGUUUUGAACUCGGC  
AACAAAGAACUGCCUGAGUUACAUCAGUCGGUUUCGUCGAGGGC  
>hsa-mir-196b MI0001150  
ACUGGUCGGUGAUUUAGGUAGUUUCCUGUUGUUGGGAUCCACCUUUCUCUCGACAGCAGCAGACU  
GCCUUCAUUACUUCAGUUG  
>hsa-mir-197 MI0000239  
GGCUGUGCCGGUAGAGAGGGCAGUGGGAGGUAAGAGCUUCUACCCUUCACCACCUUCUCCACC  
CAGCAUGGCC  
>hsa-mir-198 MI0000240  
UCAUUGGUCCAGAGGGGAGAUAGGUUCCUGUGAUUUUCCUUCUUCUCUAUAGAAUAAAUGA  
>hsa-mir-199a-2 MI0000281  
AGGAAGCUUCUGGAGAUCCUGCUCCGUCGCCCCAGUGUUCAGACUACCUGUUCAGGACAAUGCCG  
UUGUACAGUAGUCUGCACAUUGGUUAGACUGGGCAAGGGAGAGCA  
>hsa-mir-199b MI0000282  
CCAGAGGACACCUCACUCCGUCUACCCAGUGUUUAGACUAUCUGUUCAGGACUCCCAAUUGUA  
CAGUAGUCUGCACAUUGGUUAGGCUGGGCUGGGUUAGACCCUCGG  
>hsa-mir-200a MI0000737  
CCGGGCCCCUGUGAGCAUCUACCGGACAGUGCUGGAUUUCCAGCUUGACUCUAAACACUGUCUG  
GUAACGAUGUCAAAGGUGACCCGC  
>hsa-mir-200b MI0000342  
CCAGCUCGGGCAGCCGUGGCCAUCUACUGGGCAGCAUUGGAUGGAGUCAGGUCUCUAAUACUGC  
CUGGUAAUGAUGACGGCGGAGCCCUGCACG  
>hsa-mir-200c MI0000650  
CCCUCGUCUUACCCAGCAGUGUUUGGGUGCGGUUGGGAGUCUCUAAUACUGCCGGGUAAUGAUGG  
AGG  
>hsa-mir-202 MI0003130  
CGCCUCAGAGCCGCCCGCCGUUCCUUUUUCCUAUGCAUAUACUUCUUUGAGGAUCUGGCCUAAAG  
AGGUUAUAGGGCAUGGGAAAACGGGGCGGUCGGGUCCUCCCCAGCG  
>hsa-mir-203a MI0000283  
GUGUUGGGGACUCGCGCGCUGGGUCCAGUGGUUCUUAACAGUUCAACAGUUCUGUAGCGCAAUUG  
UGAAAUGUUUAGGACCACUAGACCCGGCGGGCGCGGACAGCGA  
>hsa-mir-203b MI0017343  
GCGCCCGCCGGGUCUAGUGGUCCUAAACAUUUCACAAUUGCGCUACAGAACUGUUGAACUGUUA

GAACCACUGGACCCAGCGCGC  
>hsa-mir-204 MI0000284  
GGCUACAGUCUUUCUUAUGUGACUCGUGGACUCCCCUUGUCAUCCUAUGCCUGAGAAUUAUUG  
AAGGAGGCUUGGAAGGCAAAGGGACGUUCAAUUGUCAUCACUGGC  
>hsa-mir-205 MI0000285  
AAAGAUCUCAGACAAUCCAUGUGCUUCUCUUGUCCUUAUCCACCGGAGUCUGUCUCAUACCC  
AACCAGAUUUUCAGUGGAGUGAAGUUCAGGAGGCAUGGAGCUGACA  
>hsa-mir-206 MI0000490  
UGCUCUCCGAGGCCACAUGCUCUUAUAUCCCCAUUGGAUJACUUGCUAUGGAAUGUAAGGA  
AGUGUGUGGUUUCGGCAAGUG  
>hsa-mir-208a MI0000251  
UGACGGGCGAGCUUUUGGCCCGGUUAUACCUGAUGCUCACGUUAUAAGACGAGCAAAAAGCUUGU  
UGGUCA  
>hsa-mir-208b MI0005570  
CCUCUCAGGGAAGCUUUUUGCUCGAAUUAUGUUUCUGAUCCGAAUUAAGACGAACAAAAGGUUU  
GUCUGAGGGCAG  
>hsa-mir-210 MI0000286  
ACCCGGCAGUGCCUCCAGGCGCAGGGCAGCCCCUGCCACCGCACACUGCGCUGCCCCAGACCCA  
CUGUGCGUGUGACAGCGGCUGAUCUGUGCCUGGGCAGCGCGACCC  
>hsa-mir-211 MI0000287  
UCACCUUGGCAUGUGACUUGUGGGCUUCCCUUUGUCAUCCUUCGCCUAGGGCUCUGAGCAGGGCA  
GGGACAGCAAAGGGGUGCUCAGUUGUCACUUCCACAGCACGGAG  
>hsa-mir-212 MI0000288  
CGGGGCACCCCGCCCGGACAGCGCGCCGGCACCUUGGCUCUAGACUGCUUACUGCCCGGGCCGCC  
CUCAGUAACAGUCUCCAGUCACGGCCACCGACGCCUGGCCCCCGCC  
>hsa-mir-214 MI0000290  
GGCCUGGCUGGACAGAGUUGUCAUGUGUCUGCCUGUCUACACUUGCUGUGCAGAACAUCGCUCA  
CCUGUACAGCAGGCACAGACAGGCAGUCACAUGACAACCCAGCCU  
>hsa-mir-215 MI0000291  
AUCAUUCAGAAAUGGUAUACAGGAAAUGACCUAUGAAUUGACAGACAAUAUAGCUGAGUUUGUC  
UGUCAUUUCUUUAGGCCAAUAUUCUGUAUGACUGUGCUACUCAA  
>hsa-mir-216a MI0000292  
GAUGGCUGUGAGUUGGCUAAUCUCAGCUGGCAACUGUGAGAUGUUAUACAAUCCUCACAGUG  
GUCUCUGGGAUUAUGCUAAACAGAGCAAUUUCCUAGCCUCACGA  
>hsa-mir-216b MI0005569  
GCAGACUGGAAAUCUCUGCAGGCAAUGUGAUGUCACUGAGGAAAUCACACACUUACCCGUAGA  
GAUUCUACAGUCUGACA  
>hsa-mir-217 MI0000293  
AGUAUAAUUAUACAUAGUUUUUGAUGUCGCAGAUACUGCAUCAGGAACUGAUUGGAUAAGAAUC  
AGUCACCAUCAGUUCUAAUGCAUUGCCUUCAGCAUCUAAACAAG  
>hsa-mir-218-1 MI0000294  
GUGAUAUUGUAGCGAGAUUUUCUGUUGUCUUGAUCUAACCAUGUGGUUGCGAGGUUAUGAGUAAA  
ACAUGGUUCCGUCAAGCACCAUGGAACGUCACGCAGCUUUCUACA  
>hsa-mir-218-2 MI0000295

GACCAGUCGUCGCGGGGCUUUCUJUGUGCUUGAUCUAACCAUGUGGUGGAACGAUGGAAACGGA  
ACAUGGUUCUGUCAAGCACCGCGGAAAGCACCGUGCUCUCCUGCA  
>hsa-mir-219a-1 MI0000296  
CCGCCCGGGCCGCGGCUCCUGAUUGUCCAAACGCAAUUCUGAGUCUAUGGCUCGCGCCGAGAG  
UUGAGUCUGGACGUCCCGAGCCGCGCCGCCAAACCUCGAGCGGG  
>hsa-mir-219a-2 MI0000740  
ACUCAGGGGCUUCGCCACUGAUUGUCCAAACGCAAUUCUUGUACGAGUCUGCGGCCAACCGAGAA  
UUGUGGCUGGACAUCUGUGGCUGAGCUCGCGG  
>hsa-mir-219b MI0017299  
GGAGCUCAGCCACAGAUGUCCAGCCACAAUUCUGGUUGGCCGACACUCGUACAAGAAUUGCGU  
UUGGACAAUCAGUGGCGAAGCCC  
>hsa-mir-221 MI0000298  
UGAACAUCCAGGUCUGGGCAUGAACCUUGGCAUACAAUGUAGAUUUCUGUGUUCGUUAGGCAACA  
GCUACAUUGUCUGCUGGGUUCAGGCUACCUGGAAACAUGUUCUC  
>hsa-mir-222 MI0000299  
GCUGCUGGAAGGUGUAGGUACCCUCAUUGGCUCAGUAGCCAGUGUAGAUCUGUCUUCGUAAUC  
AGCAGCUACAUCUGGCUACUGGGUCUCUGAUGGCAUCUUCUAGCU  
>hsa-mir-223 MI0000300  
CCUGGCCUCCUGCAGUGCCACGCUCGUGUAUUUGACAAGCUGAGUUGGACACUCCAUGUGGUAG  
AGUGUCAGUUUGUCAAAUACCCCAAGUGCGGCACAUGCUUACCAG  
>hsa-mir-224 MI0000301  
GGGCUUUAAGUCACUAGUGGUUCCGUUAGUAGAUGAUUGUGCAUUGUUUCAAUUGGUGCCCU  
AGUGACUACAAAGCCC  
>hsa-mir-296 MI0000747  
AGGACCCUUCAGAGGGCCCCCUCAAUCCUGUUGGCCUAAUUCAGAGGGUUGGGUGGAGGCU  
CUCCUGAAGGGCUCU  
>hsa-mir-297 MI0005775  
UGUAUGUAUGUGUGCAUGUGCAUGUAUGUGUAUAUACAUAUAUAUGUAUUAUGUACUCAUAUAUC  
A  
>hsa-mir-298 MI0005523  
UCAGGUCUUCAGCAGAAGCAGGGAGGUUCUCCAGUGGUUUUCCUUGACUGUGAGGAACUAGCCU  
GCUGCUUUGCUCAGGAGUGAGCU  
>hsa-mir-299 MI0000744  
AAGAAUUGUUUACCGUCCACAUAUAUUUGAAUAUGUAUGUGGGAUGGUAAACCGCUUCU  
>hsa-mir-300 MI0005525  
UGCUCUUGAAGAGAGGUAAUCCUUCACGCAUUUGCUUUACUUGCAAUGAUUAUACAAGGGCAGA  
CUCUCUCUGGGGAGCAA  
>hsa-mir-301a MI0000745  
ACUGCUAACGAAUGCUCUGACUUUAUUGCACUACUGUACUUACAGCUAGCAGUGCAAUAGUAUU  
GUCAAAGCAUCUGAAAGCAGG  
>hsa-mir-301b MI0005568  
GCCGAGGUGCUCUGACGAGGUUGCACUACUGUGCUCUGAGAAGCAGUGCAAUGAUUUGUCAA  
GCAUCUGGGACCA  
>hsa-mir-302a MI0000738

CCACCACUAAAACGUGGAUGUACUUGCJUUGAAACUAAAAGAAGUAAGUGCUUCCAUGUUUUGGUG  
AUGG

>hsa-mir-302b MI0000772

GCUCCCUCAACUUUACAUGGAAGUGCUUUCUGUGACUUUAAAAGUAAGUGCUUCCAUGUUUUA  
GUAGGAGU

>hsa-mir-302c MI0000773

CCUUUGCJUUAACAUGGGGUACCUGCUGUGUGAAACAAAAGUAAGUGCUUCCAUGUUUCAGUGG  
AGG

>hsa-mir-302e MI0006417

UUGGGUAAGUGCUUCCAUGCUUCAGUUUCCUUACUGGUAAGAUGGAUGUAGUAAUAGCACCUACC  
UUAUAGA

>hsa-mir-302f MI0006418

UCUGUGUAAACCUGGCAAUUUCACUUAAUUGCUUCCAUGUUUAUAAAAGA

>hsa-mir-320a MI0000542

GCUUCGCUCUCCUCCGCUUCUCUUCUCCGGUUCUUCUCCGGAGUCGGGAAAAGCUGGGUUGAGAGG  
GCGAAAAAGGAUGAGGU

>hsa-mir-320b-1 MI0003776

AAUUAAUCCUCUCUUUCUAGUUCUCCUAGAGUGAGGAAAAGCUGGGUUGAGAGGGCAAACAAA  
UUAACUAAUUAUU

>hsa-mir-320b-2 MI0003839

UGUUAAUUUUUGUCUUCUACCUAAGAAUUCUGUCUCUUAGGCUUUCUUCUCCAGAUUCCCAA  
GUUGGGAAAAGCUGGGUUGAGAGGGCAAAGGAAAAAAGAAUUCUGUCUCUGACAUAUUUAG  
AUAGGGAA

>hsa-mir-320c-1 MI0003778

UUUGCAUUA AAAAUGAGGCCUUCUUCUCCAGUUCUUCUCCAGAGUCAGGAAAAGCUGGGUUGAGA  
GGGUAGAAAAAAAUGAUGUAGG

>hsa-mir-323a MI0000807

UUGGUACUUGGAGAGAGGUGGUCUCCGUGGCGCGUUCGCUUUAUUUAUGGCGCACAUUACACGGUCG  
ACCUCUUUGCAGUAUCUAAUC

>hsa-mir-324 MI0000813

CUGACUAUGCCUCCCGCAUCCCUAGGGCAUUGGUGUAAAAGCUGGAGACCCACUGCCCAGGUG  
CUGCUGGGGGUUGUAGUC

>hsa-mir-325 MI0000824

AUACAGUGCJUUGGUUCCUAGUAGGUGUCCAGUAAGUGUUUGUGACAUAAUUUGUUUAUUGAGGAC  
CUCCUAUCAAUCAAGCACUGUGCUAGGCUCUGG

>hsa-mir-326 MI0000808

CUCAUCUGUCUGUUGGGCUGGAGGCAGGGCCUUUGUGAAGGCGGGUGGUGCUCAGAUCGCCUCUG  
GGCCCUUCCUCCAGCCCCGAGGCGGAUUA

>hsa-mir-328 MI0000804

UGGAGUGGGGGGCGAGGAGGGGCUAGGGAGAAAGUGCAUACAGCCCCUGGCCUCUCUGCCCUU  
CCGUCCCCUG

>hsa-mir-329-2 MI0001726

GUGGUACCUGAAGAGAGGUUUUCUGGGUUUCUGUUUCUUUAUUGAGGACGAAACACACCUGGUUA  
ACCUCUUUCCAGUAUCA

---

>hsa-mir-330 MI0000803  
CUUUGGCGAUCACUGCCUCUCUGGGCCUGUGUCUUAGGCUCUGCAAGAUCAACCGAGCAAAGCAC  
ACGGCCUGCAGAGAGGCAGCGCUCUGCCC

>hsa-mir-331 MI0000812  
GAGUUUGGUUUUGUUUGGGUUUGUUCUAGGUAUGGUCCCAGGGAUCCCAGAUCAAACCAGGCCCC  
UGGGCCUAUCCUAGAACCAACCUAAGCUC

>hsa-mir-335 MI0000816  
UGUUUUGAGCGGGGGUCAAGAGCAAUAACGAAAAUGUUUGUCAUAAACCGUUUUUCAUUAUUGC  
UCCUGACCUCUCUCAUUUGCUAUUAUUA

>hsa-mir-337 MI0000806  
GUAGUCAGUAGUUGGGGGUGGGAACGGCUUCAUACAGGAGUUGAUGCACAGUUAUCCAGCUCCU  
AUAUGAUGCCUUUCUUAUCCCCUUA

>hsa-mir-338 MI0000814  
UCUCCAACAAUAUCCUGGUGCUGAGUGAUGACUCAGGCGACUCCAGCAUCAGUGAUUUUGUUGAA  
GA

>hsa-mir-339 MI0000815  
CGGGGCGCCGCUCUCCCUGUCCUCCAGGAGCUCACGUGUGCCUGCCUGUGAGCGCCUCGACGAC  
AGAGCCGGCGCCUGCCCAGUGUCUGCGC

>hsa-mir-340 MI0000802  
UUGUACCUGGUGUGAUUAUAAAGCAAUGAGACUGAUUGUCAUAUGUCGUUUUGUGGGAUCCGUCUC  
AGUUACUUUAUAGCCAUACCUGGUAUCUUA

>hsa-mir-342 MI0000805  
GAAACUGGGCUCAAGGUGAGGGGUGCUAUCUGUGAUUGAGGGACAUGGUUAAUGGAAUUGUCUCA  
CACAGAAUUCGCACCCGUCACCUUGGCCUACUUA

>hsa-mir-345 MI0000825  
ACCCAAACCCUAGGUCUGCUGACUCCUAGUCCAGGGCUCGUGAUGGCUGGUGGGCCCUGAACGAG  
GGGUCUGGAGGCCUGGGUUUGAAUAUCGACAGC

>hsa-mir-346 MI0000826  
GGUCUCUGUGUUGGGCGUCUGUCUGCCCGCAUGCCUGCCUCUCUGUUGCUCUGAAGGAGGCAGGG  
GCUGGGCCUGCAGCUGCCUGGGCAGAGCGG

>hsa-mir-361 MI0000760  
GGAGCUUAUCAGAAUCUCCAGGGGUACUUUAUAAUUUCAAAAAGUCCCCCAGGUGUGAUUCUGAU  
UUGCUC

>hsa-mir-362 MI0000762  
CUUGAAUCCUUGGAACCUAGGUGUGAGUGCUAUUUUCAGUGCAACACACCUAUUAAGGAUUCAAA

>hsa-mir-363 MI0000764  
UGUUGUCGGGUGGAUCACGAUGCAAUUUUGAUGAGUAUCAUAGGAGAAAAAUUGCACGGUAUCCA  
UCUGUAAACC

>hsa-mir-365b MI0000769  
AGAGUGUUCAAGGACAGCAAGAAAAAUGAGGGACUUUCAGGGGCAGCUGUGUUUUUCUGACUCAGU  
CAUAAUGCCCUAAAAUCCUUAUUGUUCUUGCAGUGGCAUCGGG

>hsa-mir-367 MI0000775  
CCAUUACUGUUGC AAAUAUGCAACUCUGUUGAAUAUAAAUUGGAAUUGCACUUUAGCAAUGGUGA  
UGG

---

>hsa-mir-369 MI0000777  
UUGAAGGGAGAUCGACCGUGUUUAUUCGCUUUUUAUGACUUCGAAUAAUACAUGGUUGAUCUUUU  
CUCAG

>hsa-mir-370 MI0000778  
AGACAGAGAAGCCAGGUCACGUCUCUGCAGUUACACAGCUCACGAGUGCCUGCUGGGGUGGAACC  
UGGUCUGUCU

>hsa-mir-371a MI0000779  
GUGGCACUCAAAACUGUGGGGGCACUUUCUGCUCUCUGGUGAAAGUGCCGCCAUCUUUUGAGUGUU  
AC

>hsa-mir-371b MI0017393  
GGUAAACUCUAAAAGAUGGCGGCACUUUCACCAGAGAGCAGAAAGUGCCCCACAGUUUGAGUGC  
C

>hsa-mir-372 MI0000780  
GUGGGCCUCAAAUGUGGAGCACUAUUCUGAUGUCCAAGUGGAAAGUGCUGCGACAUUUGAGCGUC  
AC

>hsa-mir-373 MI0000781  
GGGAUACUCAAAAUGGGGGCGCUUUCUUUUUGUCUGUACUGGGAAGUGCUUCGAUUUUGGGGUG  
UCCC

>hsa-mir-374a MI0000782  
UACAUCGGCAUUUAUACAACCUGAUAAAGUGUUUAUAGCACUUUCAGAUUGUAUUGUAAUUGU  
CUGUGUA

>hsa-mir-374b MI0005566  
ACUCGGAUGGAUUAUACAACCUGCUAAGUGUCCUAGCACUUAGCAGGUUGUAUUAUCAUUGUC  
CGUGUCU

>hsa-mir-374c MI0016684  
ACACGGACAAUGAUAAUACAACCUGCUAAGUGCUAGGACACUUAGCAGGUUGUAUUAUCCAUC  
CGAGU

>hsa-mir-375 MI0000783  
CCCCGCGACGAGCCCUCGCACAAACCGGACCUGAGCGUUUUGUUCGUUCGGCUCGCGUGAGGC

>hsa-mir-376b MI0002466  
CAGUCCUUCUUUGGUUUUAAAACGUGGAUUAUCCUUCUAUGUUUACGUGAUUCCUGGUUAAUCA  
UAGAGGAAAUCCAUGUUUCAGUAUCAAUUGCUG

>hsa-mir-377 MI0000785  
UUGAGCAGAGGUUGCCUUGGUGAAUUCGCUUUUAUUUAUGUUGAAUCACACAAAGGCAACUUUUG  
UUUG

>hsa-mir-378a MI0000786  
AGGGCUCUCCUGACUCCAGGUCCUGUGUUACCUAGAAAUAGCACUGGACUUGGAGUCAGAAGGCC  
U

>hsa-mir-378b MI0014154  
GGUCAUUGAGUCUUAAGGCUAGUGGAAAGAGCACUGGACUUGGAGGCAGAAAGACC

>hsa-mir-378c MI0015825  
GGAGCCAUCACUGGACUUGGAGUCAGAAGAGUGGAGUCGGGUCAGACUUCAACUCUGACUUUGA  
AGGUGGUGAGUGCCUC

>hsa-mir-378d-1 MI0016749



---

ACUGUUUCUGUCCUUGUUCUUGUUGUUAUUACUGGACUUGGAGUCAGAAACAGG  
>hsa-mir-378d-2 MI0003840  
GAAUGGUUACAAGGAGAGAACACUGGACUUGGAGUCAGAAAACUUUCAUCCAAGUCAUCCCCUGC  
UCUAAGUCCCAUUUCUGUCCAUGAGAUUGUUU  
>hsa-mir-378e MI0016750  
CUGACUCCAGUGUCCAGGCCAGGGGCAGACAGUGGACAGAGAACAGUGCCCAAGACCACUGGACU  
UGGAGUCAGGACAU  
>hsa-mir-378f MI0016756  
GUCAGGUCCUGGACUCCAUAGUUUCAGGCUGCUAAACAACAGAACGAGCACUGGACUUGGAGC  
CAGAAGUCUUGGG  
>hsa-mir-378h MI0016808  
ACAGGAACACUGGACUUGGUGUCAGAUGGGAUGAGCCCUGGCUCUGUUUCCUAGCAGCAAUCUGA  
UCUUGAGCUAGUCACUGG  
>hsa-mir-378i MI0016902  
GGGAGCACUGGACUAGGAGUCAGAAGGUGGAGUUCUGGGUGCUGUUUCCACUCUUGGGCCCUG  
GGCAUGUUCUG  
>hsa-mir-378j MI0021273  
AUGCAGUGAGUCGGGGAGGAACUGGAUUUGGAGCCAGAAGAACUGGUUCUAAUAUCUACUCCCCU  
GUGUAGAGUUGGGAUUUGGGAUUAUAUGAGUUAUAUACACCAA  
>hsa-mir-379 MI0000787  
AGAGAUGGUAGACUAUGGAACGUAGGCGUUAUGAUUUCUGACCUAUGUAACAUGGUCCACUAACU  
CU  
>hsa-mir-380 MI0000788  
AAGAUGGUUGACCAUAGAACAUGCGCUAUCUCUGUGUCGUAUGUAAUAUGGUCCACAUCUU  
>hsa-mir-381 MI0000789  
UACUUAAAAGCGAGGUUGCCCUUUGUAUAUUCGGUUUAUUGACAUGGAAUAUACAAGGGCAAGCUC  
UCUGUGAGUA  
>hsa-mir-382 MI0000790  
UACUUGAAGAGAAGUUGUUCGUGGUGGAUUCGCUUUACUUAUGACGAAUCAUUCACGGACAACAC  
UUUUUUCAGUA  
>hsa-mir-383 MI0000791  
CUCCUCAGAUCAGAAGGUGAUUGUGGCUUUGGGUGGAUUAUUAUCAGCCACAGCACUGCCUGGUC  
AGAAAAGAG  
>hsa-mir-384 MI0001145  
UGUUAAAUCAGGAAUUUAAAACAAUCCUAGACAAUAUGUAUAAUGUUCAUAAGUCAUCCUAGA  
AAUUGUUCAUAUGCCUGUAACA  
>hsa-mir-409 MI0001735  
UGGUACUCGGGGAGAGGUUACCCGAGCAACUUUGCAUCUGGACGACGAAUGUUGCUCGGUGAACC  
CCUUUUCGGUAUCA  
>hsa-mir-410 MI0002465  
GGUACCUGAGAAGAGGUUGUCUGUGAUGAGUUCGCUUUUAUUAUGACGAAUAUAACACAGAUGG  
CCUGUUUUCAGUACC  
>hsa-mir-411 MI0003675  
UGGUACUUGGAGAGAUAGUAGACCGUAUAGCGUACGCUUUAUCUGUGACGUAUGUAACACGGUCC

ACUAACCCUCAGUAUCAAUCCAUCCCGAG  
>hsa-mir-412 MI0002464  
CUGGGGUACGGGAUGGAUGGUCGACCAGUUGGAAAGUAAUUGUUUCUAAUGUACUUCACCUGGU  
CCACUAGCCGUCCGUAUCCGCUGCAG  
>hsa-mir-422a MI0001444  
GAGAGAAGCACUGGACUUAGGGUCAGAAGGCCUGAGUCUCUCUGCUGCAGAUGGGCUCUCUGUCC  
CUGAGCCAAGCUUUGUCCUCCUGG  
>hsa-mir-423 MI0001445  
AUAAAGGAAGUUAGGCUGAGGGGCAGAGAGCGAGACUUUUCUAUUUCCAAAAGCUCGGUCUGAG  
GCCCCUCAGUCUUGCUUCCUAACCCGCGC  
>hsa-mir-424 MI0001446  
CGAGGGGAUACAGCAGCAAUUCAUGUUUUGAAGUGUUCUAAAUGGUUCAAAACGUGAGGCGCUGC  
UAUACCCUCUGGGGAAGGUAGAAGGUGGGG  
>hsa-mir-425 MI0001448  
GAAAGCGCUUUGGAAUGACACGAUCACUCCCGUUGAGUGGGCACCCGAGAAGCCAUCGGGAAUGU  
CGUGUCCGCCAGUGCUCUUUC  
>hsa-mir-429 MI0001641  
CGCCGGCCGAUGGGCGUCUACCAGACAUGGUUAGACCUGGCCUCUGUCUAAUACUGUCUGGUA  
AAACCGUCCAUCCGCUGC  
>hsa-mir-431 MI0001721  
UCCUGCUUGUCCUGCGAGGUGUCUUGCAGGCCGUAUGCAGGCCACACUGACGGUAACGUUGCAG  
GUCGUCUUGCAGGGCUUCUCGCAAGACGACAUCUCAUCACCAACGACG  
>hsa-mir-432 MI0003133  
UGACUCCUCCAGGUCUUGGAGUAGGUCAUUGGGUGGAUCCUCUAUUUCCUUACGUGGGCCACUGG  
AUGGCUCCUCCAUGUCUUGGAGUAGAUA  
>hsa-mir-433 MI0001723  
CCGGGGAGAAGUACGGUGAGCCUGUCAUUAUUCAGAGAGGCUAGAUCUUCUGUGUUGAGAAGGAU  
CAUGAUGGGCUCUCCGGUGUUCUCCAGG  
>hsa-mir-448 MI0001637  
GCCGGGAGGUUGAACAUCCUGCAUAGUGCUGCCAGGAAAUCCCUAUUUCAUUAUAGAGGGGGCUG  
GCUGGUUGCAUUAUGUAGGAUGUCCCAUCUCCAGCCCACUUCGUCA  
>hsa-mir-449a MI0001648  
CUGUGUGUGAUGAGCUGGCAGUGUAUUGUUAGCUGGUUGAAUAUGUGAAUGGCAUCGGCUAACAU  
GCAACUGCUGUCUUAUUGCAUAUACA  
>hsa-mir-449b MI0003673  
UGACCUGAAUCAGGUAGGCAGUGUAUUGUUAGCUGGCUGCUUGGGUCAAGUCAGCAGCCACAACU  
ACCCUGCCACUUGCUUCUGGAUAAAUUCUUCU  
>hsa-mir-449c MI0003823  
GCUGGGAUGUGUCAGGUAGGCAGUGUAUUGCUAGCGGCUGUJAAUGAUUUUAACAGUUGCUGU  
GCACUCCUCUCUGUUGCAUUCAGAAGC  
>hsa-mir-450a-2 MI0003187  
CCAAAGAAAGAUGCUAACUAUUUUUGCGAUGUGUCCUAAUAUGUAAUAUAAAUGUAUUGGGGA  
CAUUUUGCAUUCUAAGUUUUGUAUCAUAAUAUGG  
>hsa-mir-451a MI0001729

CUUGGGAAUGGCAAGGAAACCGUJACCAUJACUGAGUUJAGUAAUGGUAAUGGUUCUCUJGCUAU  
ACCCAGA

>hsa-mir-451b MI0017360

UGGGUJAUJAGCAAGAGAACCAUJACCAUJACUAAACUCAGUAAUGGUAAACGGUUUCCUJGCCAUUC  
CCA

>hsa-mir-452 MI0001733

GCUAAGCACUJACAACUGUUJGCAGAGGAAACUGAGACUUJGUAAACUAUGUCUCAGUCUCAUCUG  
CAAAGAAGUAAUGUCUUJGC

>hsa-mir-454 MI0003820

UCUGUUUJAUJACCAGAUCCUJAGAACCCUJAUJCAAUJAUJUGUCUCUGJGUGUAAAUJAGUUCUGAGUJ  
GUGCAAUJAUJGCUUJAUJAGGGUUJUGGUGUUJUGGAAAGAACAUGGGCAGG

>hsa-mir-455 MI0003513

UCCCUJGGCGUGAGGGUJAUJUGCCUUJGGACUJACUJGUGGAAGCCAGCACCAUJGAGUCCAUJGGG  
CAUJAUJACACUJGCCUJCAAGGCCUJAUJGUCAUC

>hsa-mir-466 MI0014157

GUGUGUGUJAUJAUJGUGUGUJGCAUJGUGUGUJAUJAUJGUGUGUJAUJAUJGUJACACAUJACACAUJACACGC  
AACACACAUJAUJAUJACAUGC

>hsa-mir-483 MI0002467

GAGGGGGAAGACGGGAGGAAAGAAGGGAGUGGUUCCAUJACGCCUCCUJACUCCUCUCCUCCCGU  
CUUCUCCUCUC

>hsa-mir-484 MI0002468

AGCCUCGUCAGGCUCAGUCCCCUCCGAUJAAACCCUJAAAUJAGGGACUUUCCCGGGGGUGACCC  
UGGCUUUUUJUGGCG

>hsa-mir-485 MI0002469

ACUJGGAGAGAGGCUGGCCGUGJAUJGAAUJCGAUJCAUJCAAAGCGAGUJAUJACACGGCUCUCCUCU  
CUUUUJAGU

>hsa-mir-486 MI0002470

GCAUCCUGUJACUGAGCUGCCCCGAGGCCUUJCAUJGUGGCCAGCUCGGGGCAGCUCAGUJACAGGA  
UAC

>hsa-mir-487b MI0003530

UUGGUJACUJGGAGAGUGGUUJAUJCCUGUCCUGUUCGUUUJGCUJAUJGUCGAAUJCGUJACAGGGUCA  
UCCACUUUUUJAGUJAUJCAA

>hsa-mir-488 MI0003123

GAGAAUJCAUJUCUCCAGAUJAAUGGCACUCUJAAACAAGUUUCCAAAUJGUUUJGAAAGGCUJAUUU  
CUJGGUCJAGAUJGACUCUC

>hsa-mir-489 MI0003124

GUGGCAGCUJGGUGGUCGUJAUJGUGJAGGCCAUUUJACUJGAACCUUUJAGGAGUGJACAUJCAUJAU  
ACGGCAGCUJAAACUGCUJAC

>hsa-mir-490 MI0003125

UGGAGGCCUJGUCUGGUUUJGAAAGUJCAUJGUUJGACACCAUJGGAUCUCCAGGUGGGUCAAGUUU  
AGAGAUJGACCAACCUJGGAGGACUCCAUJGUGUJGAGCUGUJACAAAGCAGCGGACACUJCCA

>hsa-mir-491 MI0003126

UUGACUJAGCUGGGUJAGUGGGGAACCCUJCCAUGAGGAGUJAGAACACUCCUJAUJGCAAGAUJCCC  
UUCUJACCUGGCUGGGUJUGG

---

>hsa-mir-492 MI0003131  
CAACUACAGCCACUACUACAGGACCAUCGAGGACCUGCGGGACAAGAUUCUUGGUGCCACCAUUG  
AGAACGCCAGGAUUGUCCUGCAGAUCAACAAUGCUC AACUGGCUGCAGAUG

>hsa-mir-493 MI0003132  
CUGGCCUCCAGGGCUUUGUACAUGGUAGGCUUUCAUUC AUUCGUUUGCACAUUCGGUGAAGGUCU  
ACUGUGUGCCAGGCCUGUGCCAG

>hsa-mir-494 MI0003134  
GAUACUCGAAGGAGAGGUUGUCCGUGUUGUCUUCUCUUUAUUUAUGAUGAAACAUCACGGGAAA  
CCUCUUUUUAGUAUC

>hsa-mir-495 MI0003135  
UGGUACCUGAAAAGAAGUUGCCCAUGUUAUUUUCGUUUAUAUGUGACGAAACAAACAUGGUGCA  
CUUCUUUUUCGGUAUCA

>hsa-mir-496 MI0003136  
CCCAAGUCAGGUACUCGAAUGGAGGUUGUCCAUGGUGUGUUAUUUUUAUUUAUGAUGAGUAUUAC  
AUGGCCAAUCUCCUUUCGGUACUCAAUUCUUCUUGGG

>hsa-mir-497 MI0003138  
CCACCCCGUCCUGCUCGCCCGCCAGCAGCACACUGUGGUUUUGUACGGCACUGUGGCCACGUCCA  
AACCACACUGUGGUGUAGAGCGAGGGUGGGGGAGGCACCGCCGAGG

>hsa-mir-498 MI0003142  
AACCCUCCUUGGGAAGUGAAGCUCAGGCUGUGAUUUCAAGCCAGGGGGCGUUUUUCUAUAACUGG  
AUGAAAAGCACCUCAGAGCUUGAAGCUCACAGUUUGAGAGCAAUCGUCUAAGGAAGUU

>hsa-mir-499a MI0003183  
GCCCUUGUCCCUUGUGCCUUGGGCGGGCGGCUGUUAAGACUUGCAGUGAUGUUAAACUCCUCUCCA  
CGUGAACAUACAGCAAGUCUGUGCUGCUUCCCGUCCUACGCUGCCUGGGCAGGGU

>hsa-mir-499b MI0017396  
GGAAGCAGCACAGACUUGCUGUGAUGUUCACGUGGAGAGGAGUUAACAUCACUGCAAGUCUUA  
CAGCCGCC

>hsa-mir-502 MI0003186  
UGCUCUUUUUCUUAUCCUUGCUAUCUGGGUGCUAGUGCUGGCUC AAUGCAAUGCACCUGGGCA  
AGGAUUCAGAGAGGGGGAGCU

>hsa-mir-503 MI0003188  
UGCCCUAGCAGCGGGAACAGUUCUGCAGUGAGCGAUCGGUGCUCUGGGGUAUUGUUUCCGCUGCC  
AGGGUA

>hsa-mir-504 MI0003189  
GCUGCUGUUGGGAGACCCUGGUCUGCACUCUAUCUGUAUUCUUAUCUGAAGGGAGUGCAGGGCAGG  
GUUCCCAUACAGAGGGC

>hsa-mir-505 MI0003190  
GAUGCACCCAGUGGGGGAGCCAGGAAGUAUUGAUGUUUCUGCCAGUUUAGCGUCAACACUUGCUG  
GUUCCUCUCUGGAGCAUC

>hsa-mir-506 MI0003193  
GCCACCACCAUCAGCCAUAUCUAUGUGUAGUGCCUUAUUCAGGAAGGUGUUACUUAUAGAUUAAU  
AUUUGUAAGGCACCCUUCUGAGUAGAGUAAUGUGCAACAUGGACAACAUUUGUGGUGGC

>hsa-mir-507 MI0003194  
GUGCUGUGUGUAGUGCUUCACUUCAAGAAGUGCCAUGCAUGUGUCUAGAAAUAUGUUUUGCACCU

UUUGGAGUGAAAUA AUGCACAACAGAUAC  
>hsa-mir-508 MI0003195  
CCACCUUCAGCUGAGUGUAGUGCCCUACUCCAGAGGGCGUCACUCAUGUAAACUAAAAUCAUGAUU  
GUAGCCUUUUGGAGUAGAGUAAUACACAUCACGUAACGCAUAUUUGGUGG  
>hsa-mir-510 MI0003197  
GUGGUGUCCUACUCAGGAGAGUGGCAAUCACAUGUAAUUAGGUGUGAUUGAAACCUCUAAGAGUG  
GAGUAACAC  
>hsa-mir-511 MI0003127  
CAAUAGACACCCAUCGUGUCUUUJGUCUCUGCAGUCAGUAAAUAUUUUUUUGUGAAUGUGUAGCAA  
AAGACAGAAUGGUGGUCCAUUG  
>hsa-mir-512-2 MI0003141  
GGUACUUCUCAGUCUGUGGCACUCAGCCUUGAGGGCACUUUCUGGUGCCAGAAUGAAAGUGCUGU  
CAUAGCUGAGGUCCAUGACUGAGGCGAGCACC  
>hsa-mir-513a-1 MI0003191  
GGGAUGCCACAUUCAGCCAUUCAGCGUACAGUGCCUUUCACAGGGAGGUGUCAUUUAUGUGAACU  
AAAAUAUAAAUUUCACCUUUCUGAGAAGGGUAAUGUACAGCAUGCACUGCAUAUGUGGUGUCCC  
>hsa-mir-514a-1 MI0003198  
AACAUUGUUGUCUGUGGUACCCUACUCUGGAGAGUGACAAUCAUGUAUAAUUAUUUGAUUGACA  
CUUCUGUGAGUAGAGUAACGCAUGACACGUACG  
>hsa-mir-518c MI0003159  
GCGAGAAGAUUCU AUGCUGUGACUCUCUGGAGGGAAGCACUUUCUGUUGUCUGAAAGAAAACAAA  
GCGCUUCUCUUUAGAGUGUUACGGUUUGAGAAAAGC  
>hsa-mir-519d MI0003162  
UCCCAUGCUGUGACCCUCCAAAGGGAAGCGCUUUCUGUUUGUUUUCUCUUAACAAGUGCCUCC  
CUUUAGAGUGUUACCGUUUGGGA  
>hsa-mir-532 MI0003205  
CGACUUGCUUUCUCUCCUCCAUGCCUUGAGUGUAGGACCGUUGGCAUCUUAUUUACCCUCCACA  
CCCAAGGCUUGCAAAAAAGCGAGCCU  
>hsa-mir-541 MI0005539  
ACGUCAGGGAAAGGAUUCUGCUGUCGGUCCCACUCCAAAAGUUCACAGAAUGGGUGGUGGGCACAG  
AAUCUGGACUCUGCUUGUG  
>hsa-mir-542 MI0003686  
CAGAUCUCAGACAUCUCGGGGAUCAUCAUGUCACGAGAUACCAGUGUGCACUUGUGACAGAUUGA  
UAACUGAAAGGUCUGGGAGCCACUCAUCUUA  
>hsa-mir-544a MI0003515  
AUUUUCAUCACCUAGGGAUCUUGUUA AAAAGCAGAUUCUGAUUCAGGGACCAAGAUUCUGCAUUU  
UUAGCAAGUUCUCAAGUGAUGCUAU  
>hsa-mir-544b MI0014159  
GGAAUUUUGUUAAAAUGCAGAAUCCAUUUCUGUAGCUCUGAGACUAGACCUGAGGUUGUGCAUUU  
CUAACAAAGUGCC  
>hsa-mir-545 MI0003516  
CCCAGCCUGGCACAUUAGUAGGCCUCAGUAAAUGUUUAUUAGAUGAAUAAAUGAAUGACUCAUCA  
GCAAAACAUUUUUGUGUGCCUGCUAAAGUGAGCUCCACAGG  
>hsa-mir-548a-1 MI0003593

UGCAGGGAGGUUUUAGGUUGGUGCAAAGUAAUUGUGAUUUUUGCCAUUAAAAGUAAACGACAAAA  
CUGGCAAUUACUUUUGCACCAAACCUUGGUUUU  
>hsa-mir-548a-3 MI0003612  
CCUAGAAUGUUUUUAGGUCGGUGCAAAGUAAUUGCGAGUUUUACCAUUACUUUCAUUGGCAAAA  
CUGGCAAUUACUUUUGCACCAAACGUAAUACUU  
>hsa-mir-548a1 MI0016851  
GGUCGGUGCAAAGUAAUUGCUGUUUUUGCCAUUAAAAUAAUGGCAUUAAAAGUAAUGGCAAAA  
ACGGCAAUGACUUUUGUACCAAUCUAAUUAUCU  
>hsa-mir-548ao MI0017871  
AACUAUUCUUAGGUUGAUGCAGAAGUAACUACGGUUUUUGCAGUUGAAAGUAAUGGCAAAGACCG  
UGACUACUUUUUGCAACAGCCUAAUAGUUUCU  
>hsa-mir-548b MI0003596  
CAGACUAUAUUAUUUAGGUUGGCGCAAAGUAAUUGUGGUUUUGGCCUUUAUUUCAAUGGCAAGA  
ACCUCAGUUGCUUUUGUGCCAACCUAAUACUU  
>hsa-mir-548d-1 MI0003668  
AAACAAGUUUAUUUAGGUUGGUGCAAAGUAAUUGUGGUUUUGCCUGUAAAAGUAAUGGCAAAA  
ACCACAGUUUCUUUUGCACCAAGACUAAUAAAG  
>hsa-mir-548f-2 MI0006375  
UAAUAACUAUUAGGUUGGUGCGAACAUAAUUGCAGUUUUUAUCAUUACUUUAAUGGCAAAAACU  
GUAAUUACUUUUGCACCAACCUAAUUAUUUAGU  
>hsa-mir-548h-3 MI0006413  
UCUGAUUCUGCAUGUAUUAGGUUGGUGCAAAGUAAUCGCGUUUUUGUCAUUGAAAGUAAUAGC  
AAAAACUGCAAUUACUUUUGCACCAACCUAAAAGUAGUCACUGUCUUCAGUAU  
>hsa-mir-548h-4 MI0006414  
GCUAUUAGGUUGGUGCAAAGUAAUCGCGUUUUUGUCAUUACUUUAAUUACUUUACGUUUCAUU  
AAUGACAAAACCGCAAUUACUUUUGCACCAACCUAAUACUUGCUA  
>hsa-mir-548i-1 MI0006421  
CAGAUGGCUCUGAAGUUUGCACCCUAUUAGGUUGGUGCAAAGUAAUUGCGGAUUUUUGCCAUUAA  
AAGUAAUGGCAAAAAGCAAUUAUUUUUGUACCAGCCUAGUAUCUUUUCUCCUUCUACCAAACU  
UUGUCCCUGAGCCAUCUCA  
>hsa-mir-548j MI0006345  
GGGCAGCCAGUGAAUAGUUAGCUGGUGCAAAGUAAUUGCGGUCUUUGGUAAUUACUUUCAGUGGC  
AAAAACUGCAUUACUUUUGCACCAAGCUACUAGAACCGCUGAGUUCAG  
>hsa-mir-548k MI0006354  
CUUUUCUCAAGUAUUGCUGUUAGGUUGGUGCAAAGUACUUGCGGAUUUUUGCUUUACUUUAAUG  
GCAAAAACCGCAAUUUUUUUGCUUCAACCUAAUUAUGAUGCAAAAUUGGCU  
>hsa-mir-548o MI0006402  
UGGUGAAAUGUGUUGAUUGUAAUGGUUCCUAUUCUGAUCAAUAAACAUGGUUUUGAGCCUAGUUA  
CAAUGAUCUAAAUUCACGGUCCAAAACUGCAGUUACUUUUGCACCAAC  
>hsa-mir-548q MI0010637  
AUUUUAGGCUGGUGCAAAGUAAUGGCGUUUUUGCCAUUACUUUCAAUUUUUACCAUJAAAAGU  
AAUGGCAAAAAGCAUGAUUACUUUUUACCAACCU  
>hsa-mir-548y MI0016595  
GCCUAAACUAUUAGGUUGGUGCAAAGUAAUCACUGUUUUUGCCAUUACUCUCAGUGGCAAAAAC

CGUGAUUACUUUUGCACCAACCUAGUAACACCUUCACUGUGGGGG  
>hsa-mir-549a MI0003679  
AGACAUGCAACUCAAGAAUAUAUUGAGAGCUCAUCCAUAAGUUGUCACUGUCUCAAUCAGUGACA  
ACUAUGGAUGAGCUCUUAUAUAUCCCAGGC  
>hsa-mir-550a-1 MI0003600  
UGAUGCUUUGCUGGCUGGUGCAGUGCCUGAGGGAGUAAGAGCCCUGUUGUUGUAAGAUAGUGUCU  
UACUCCCUCAGGCACAUCUCCAACAAGUCUCU  
>hsa-mir-550b-1 MI0016686  
AGAGACUUGUUGGAGAUGUGCCUGAGGGAGUAAGACACUAUCUUACAACAACAGGGCUCUUCUC  
CCUCAGGCACUGCACCAGCCAGCAAAGCAUCA  
>hsa-mir-551a MI0003556  
GGGGACUGCCGGGUGACCCUGGAAUCCAGAGUGGGUGGGGCCAGUCUGACCGUUUCUAGGCGAC  
CCACUCUUGGUUCCAGGGUUGCCUGGAAA  
>hsa-mir-551b MI0003575  
AGAUGUGCUCUCCUGGCCCAUGAAUUAAGCGUGGGUGAGACCUGGUGCAGAACGGGAAGGCGAC  
CCAUAUCUUGGUUUCAGAGGCUGUGAGAAUAA  
>hsa-mir-552 MI0003557  
AACCAUUCAAUAUACCACAGUUUGUUUAACCUUUUGCCUGUUGGUUGAAGAUGCCUUUCAACAG  
GUGACUGGUUAGACAAACUGUGGUUAUAUACA  
>hsa-mir-553 MI0003558  
CUUCAAUUUUAUUUUAAAACGGUGAGAUUUUGUUUGUCUGAGAAAUCUCGCUGUUUJAGACUG  
AGG  
>hsa-mir-554 MI0003559  
ACCUGAGUAACCUUUGCUAGUCCUGACUCAGCCAGUACUGGUCUAGACUGGUGAUGGGUCAGGG  
UUCAUAUUUUUGGCAUCUCUCUCUGGGCAUCU  
>hsa-mir-555 MI0003561  
GGAGUGAACUCAGAUGUGGAGCACUACCUUUGUGAGCAGUGUGACCCAAGGCCUGUGGACAGGGU  
AAGCUGAACCUUGAUAAAACUCUGAUCUAU  
>hsa-mir-556 MI0003562  
GAUAGUAAUAGAAAGAUGAGCUCAUUGUAAUAUGAGCUUCAUUUAUACAUUUCAUAUUACCAU  
AGCUCACUUUUUUUAUUACUACCUUCAACA  
>hsa-mir-557 MI0003563  
AGAAUGGGCAAUGAACAGUAAAUUUGGAGGCCUGGGGCCUCCUGCUGCUGGAGAAGUGUUUG  
CACGGGUGGGCCUUGUCUUUGAAAGGAGGUGGA  
>hsa-mir-558 MI0003564  
GUGUGUGUGUGUGUGUGUGGUUAUUUGGUUAUAGUAGCUCUAGACUCUAUUUAUAGUUUCCUGAGC  
UGCUGUACCAAAUACCACAAACGGGCUG  
>hsa-mir-559 MI0003565  
GCUCCAGUAACAUCUUAAGUAAAUAUGCACCAAAAUACUUUUGGUAAAUACAGUUUUGGUGCA  
UAUUUACUUUAGGAUGUACUGGAGCUCCA  
>hsa-mir-561 MI0003567  
CUUCAUCCACCAGUCCUCCAGGAACAUCAAGGAUCUUAACUUUGCCAGAGCUACAAAGGCAAAG  
UUUAAGAUCUUGAAGUUCUGGGGGAACCAU  
>hsa-mir-562 MI0003568

---

AGUGAAAUJGCUAGGUCAUAUGGUCAGUCUACUUUUAGAGUAAUJUGUGAAACUGUUUUCAAAGU  
AGCUGUACCAUUUGCACUCCCUGUGGCAAU  
>hsa-mir-563 MI0003569  
AGCAAAGAAGUGUGUUGCCCUCUAGGAAAUGUGUGUUGCUCUGAUGUAAUUAGGUUGACAUACGU  
UUCCCUGGUAGCCA  
>hsa-mir-564 MI0003570  
CGGGCAGCGGGUGCCAGGCACGGUGUCAGCAGGCAACAUGGCCGAGAGGCCGGGGCCUCCGGGCG  
GCGCCGUGUCCGCGACCGCGUACCCUGAC  
>hsa-mir-566 MI0003572  
GCUAGGCGUGGUGGGCGGGCGCCUGUGAUCCCAACUACUCAGGAGGCUGGGGCAGCAGAAUCGCUU  
GAACCCGGGAGGCGAAGGUUGCAGUGAGC  
>hsa-mir-567 MI0003573  
GGAUUCUUUAGGACAGUAUGUUCUCCAGGACAGAACAUCUUUGCUAUUUUGUACUGGAAGAA  
CAUGC AAAACUAAAAAAAAAAAAAGUUUUGCU  
>hsa-mir-568 MI0003574  
GAUAUACACUAUAUUUAGUAUAAAUGUAUACACACUCCUAUAUGUAUCCACAUAUAUAUAGUGU  
AUAUAUAUACAUGUAUAGGUGUGUAUAUG  
>hsa-mir-569 MI0003576  
GGUAUUGUUAGAUUAAUUUUGUGGGACAUAACAACAGCAUCAGAAGCAACAUCAGCUUJAGUUA  
AUGAAUCCUGGAAAGUUAAGUGACUUUAUUU  
>hsa-mir-571 MI0003578  
CCUCAGUAAGACCAAGCUCAGUGGCAUUUCCUUGUCUGUAGCCAUGUCUAUGGGCUCUUGAGU  
UGGCCAUCUGAGUGAGGGCCUGCUUAUUCUA  
>hsa-mir-572 MI0003579  
GUCGAGGCCGUGGCCCGGAAGUGGUCGGGGCCGUCGCGGGCGGAAGGGCGCCUGUGCUUCGUCGG  
CUCGGCGGUGGCCAGCCAGGCCCGCGGGA  
>hsa-mir-573 MI0003580  
UUUAGCGUUUCUCCCUGAAGUGAUGUGUAACUGAUCAGGAUCUACUCAUGUCGUCUUUGGUAAA  
GUUAUGUCGCUUGUCAGGGUGAGGAGUUUUUG  
>hsa-mir-574 MI0003581  
GGGACCUGCGUGGGUGCGGGCGUGUGAGUGUGUGUGUGAGUGUGUGUCGCCGGGUCACGC  
UCAUGCACACACCCACACGCCACACUCAGG  
>hsa-mir-575 MI0003582  
AAUUCAGCCUGCCACUGGCUUAUGUCAUGACCUUGGGCUACUCAGGCUGUCUGCACAUGAGCC  
AGUUGGACAGGAGCAGUGCCACUCAACUC  
>hsa-mir-576 MI0003583  
UACAAUCCAACGAGGAUUCUAAUUUCUCCACGUCUUUGGUAAUAAGGUUUGGCAAAGAUGUGGAA  
AAAUUGGAAUCCUCAUUCGAUUGGUUAUAACCA  
>hsa-mir-577 MI0003584  
UGGGGGAGUGAAGAGUAGAUAAAAUAUUGGUACCUGAUGAAUCUGAGGCCAGGUUUCAAUACUUU  
AUCUGCUCUUCAUUUCCCCAUUACUACUUAC  
>hsa-mir-578 MI0003585  
AGAUAAAUCUAUAGACAAAUACAAUCCCGGACAACAAGAAGCUCCUAUAGCUCCUGUAGCUUCU  
UGUGCUCUAGGAUUGUAUUUUGUUUAUAUAU



---

>hsa-mir-579 MI0003586  
CAUAUUAGGUUAAUGCAAAAGUAAUCGCGGUUUUGGCCAGAUGACGAUUUGAAUUAUUAAUUUCA  
UUUGGUUAUAAACCGCGAUUAUUUUUGCAUCAAC

>hsa-mir-580 MI0003587  
AUAAAAUUUCCAAUUGGAACCUAAUGAUUCAUCAGACUCAGAUUUUAAGUUAACAGUAUUUGAG  
AAUGAUGAAUCAUUAGGUUCCGGUCAGAAAUU

>hsa-mir-581 MI0003588  
GUUAUGUGAAGGUUUUCUUGUGUUCUCUAGAUCAGUGC'UUUUAGAAAAUUUGUGUGAUCUAAAGA  
ACACAAAGAAUACCUACACAGAACCACCGC

>hsa-mir-582 MI0003589  
AUCUGUGCUCUUUGAUUACAGUUGUUAACCAGUUACUAAUCUAAUUGUAACUGGUUGAAC  
AACUGAACCCAAAGGGUGCAAAGUAGAAACAUU

>hsa-mir-583 MI0003590  
AACUCACACAUUAACCAAAGAGGAAGGUCCAUUACUGCAGGGAUUCUAGCAGUACUGGGACCUA  
CCUCUUUGGU

>hsa-mir-584 MI0003591  
UAGGGUGACCAGCAUUAUGGUUUUGCCUGGGACUGAGGAAUUUGCUGGGAUUUGUCAGUUCAGG  
CCAACCAGGCUGGUUGGUCUCCCGAAGCAAC

>hsa-mir-585 MI0003592  
UGGGGUGUCUGUGCUAUGGCAGCCUAGCACACAGAUACGCCAGAGAAAGCCUGAACGUUGGGC  
GUAUCUGUAUGCUAGGGCUGCUGUAACAA

>hsa-mir-586 MI0003594  
AUGGGGUAAAACCAUUAUGCAUUGUAUUUUUAGGUCCCAAUACAUGUGGGCCCUAAAAUACA AU  
GCAUAAUGGUUUUUCACUCUUUAUCUUCUUAU

>hsa-mir-587 MI0003595  
CUCCUAUGCACCCUCUUUCAUAGGUGAUGAGUCACAGGGCUCAGGGAAUGUGUCUGCACCUGUG  
ACUCAUCACCAGUGGAAAGCCCAUCCCAU AU

>hsa-mir-588 MI0003597  
AGCUUAGGUACCAAUUUGGCCACAAUGGGUUAGAACACUAUUCCAUUGUGUUCUUAACCCACCAUG  
GCCAAAAUUGGGCCUAAG

>hsa-mir-589 MI0003599  
UCCAGCCUGUGCCCAGCAGCCCCUGAGAACCACGUCUCUGAGCUGGGUACUGCCUGUUCAGA  
ACAAAUGCCGGUUCCAGACGCUGCCAGCUGGCC

>hsa-mir-590 MI0003602  
UAGCCAGUCAGAAAUGAGCUUAUUCAUAAAAGUGCAGUAUGGUGAAGUCAUUCUGUAAUUUUUAUG  
UAUAAGCUAGUCUCUGAUUGAAACAUGCAGCA

>hsa-mir-591 MI0003603  
UCUUAUCAUAGAGGUAGACCAUGGGUUCUCAUUGUAAUAGUGUAGAAUGUUGGUUAACUGUGGAC  
UCCCUGGCUCUGUCUCAAUCUACUGAUUC

>hsa-mir-592 MI0003604  
UAUUAUGCCAUGACAUUGUGUCAAUUUGCGAUGAUGUGUUGUGAUGGCACAGCGUCAUCACGUGG  
UGACGCAACAUCAUGACGUAAGACGUCACAAC

>hsa-mir-593 MI0003605  
CCCCAGAAUCUGUCAGGCACCAGCCAGGCAUUGCUCAGCCCGUUUCCUCUGGGGGAGCAAGGA

GUGGUGCUGGGUUUGUCUCUGCUGGGGUUUCUCCU  
>hsa-mir-595 MI0003607  
ACGGAAGCCUGCACGCAUUUAAACCAGCACGCUCA AUGUAGUCUUGUAAGGAACAGGUUGAAGU  
GUGCCGUGGUGUGUCUGGAGGAAGCGCCUGU  
>hsa-mir-596 MI0003608  
AGCACGGCCUCUCCGAAGCCUGCCCGGCUCUCGGGAACCUGCCUCCCGCAUGGCAGCUGCUGCC  
CUUCGGAGGCCG  
>hsa-mir-597 MI0003609  
UACUUACUCUACGUGUGUGUCACUCGAUGACCACUGUGAAGACAGUAAAAUGUACAGUGGUUCUC  
UUGUGGCUCAAGCGUAAUGUAGAGUACUGGUC  
>hsa-mir-598 MI0003610  
GCUUGAUGAUGCUGCUGAUGCUGGCGGUGAUCCCGAUGGUGUGAGCUGGAAAUGGGGUGCUACGU  
CAUCGUUGUCAUCGUCAUCAUCAUCCGAG  
>hsa-mir-599 MI0003611  
AAAGACAUGCUGUCCACAGUGUGUUUGAUAGCUGACAUGGGACAGGGAUUCUUUCACUGUUGU  
GUCAGUUUAUCAAACCCAUACUUGGAUGAC  
>hsa-mir-600 MI0003613  
AAGUCACGUGCUGGGCUCAGCUUCAUAGGAAGGCUCUUGUCUGUCAGGCAGUGGAGUUACUUA  
CAGACAAGAGCCUUGCUCAGGCCAGCCCUGCCC  
>hsa-mir-601 MI0003614  
UGCAUGAGUUCGUCUUGGUCUAGGAUUGUUGGAGGAGUCAGAAAAACUACCCCAGGGAUCCUGAA  
GUCCUUUGGGUGGA  
>hsa-mir-602 MI0003615  
UUCUCACCCCCGCCUGACACGGGCGACAGCUGCGGCCCGCUGUGUUCACUCGGGCCGAGUGCGUC  
UCCUGUCAGGCAAGGGAGAGCAGAGCCCCCUG  
>hsa-mir-604 MI0003617  
AGAGCAUCGUGCUUGACCUUCCACGCUCUCGUGUCCACUAGCAGGCAGGUUUUCUGACACAGGCU  
GCGGAAUUCAGGACAGUGCAUCAUGGAGA  
>hsa-mir-605 MI0003618  
GCCCUAGCUUGGUUCUAAAUCCCAUGGUGCCUUCUCCUUGGGAAAAACAGAGAAGGCACUAUGAG  
AUUUAGAAUCAAGUUAGG  
>hsa-mir-606 MI0003619  
UGUAUCCUUGGUUUUUAGUAGUUUACUAUGAUGAGGUGUGCCAUCCACCCCAUCAUAGUAAACU  
ACUGAAAAUCAAGAUACAAGUGCCUGACCA  
>hsa-mir-607 MI0003620  
UUGCCUAAAGUCACACAGGUUAUAGAUCUGGAUUGGAACCCAGGGAGCCAGACUGCCUGGGUUCA  
AAUCCAGAUCUAUAACUUGUGUGACUUUGG  
>hsa-mir-608 MI0003621  
GGGCCAAGGUGGGCCAGGGGUGGUGUUGGGACAGCUCGUGUUAAAAAGGCAUCUCCAAGAGCUUC  
CAUCAAAAGGCUGCCUCUUGGUGCAGCACAGGUAGA  
>hsa-mir-609 MI0003622  
UGCUCGGCUGUCCUAGGGUGUUUCUCAUCUCUGGUCUAUAAUGGGUUAAAUGUAGAGAUGA  
GGGCAACACCCUAGGAACAGCAGAGGAACC  
>hsa-mir-610 MI0003623

UCUAUUUGUCUUAGGUGAGCUAAAUGUGUGUCUGGGACACAUUUGAGCCAAAUGUCCAGCACACA  
UUUAGCUCACAUAAGAAAAAUGGACUCUAGU  
>hsa-mir-611 MI0003624  
AAAAUGGUGAGAGCGUUGAGGGGAGUUCAGACGGAGAUGCGAGGACCCUCGGGGUCUGACCCA  
CA  
>hsa-mir-612 MI0003625  
UCCCAUCUGGACCCUGCUGGGCAGGGCUUCUGAGCUCUUAGCACUAGCAGGAGGGGCUCAGGG  
GCCUCUCCUCAUGGCAGCCAGGACAGGACUCUCA  
>hsa-mir-613 MI0003626  
GGUGAGUGCGUUUCCAAGUGUGAAGGGACCCUCCUGUAGUGUCUUAUAUACAUAACAGUAGGAA  
UGUUCUUCUUGCCACUCAUACACCUUUA  
>hsa-mir-614 MI0003627  
UCUAAGAAACGCAGUGGUCUCUGAAGCCUGCAGGGGCAGGCCAGCCUGCACUGAACGCCUGUUC  
UUGCCAGGUGGCAGAAGGUUGCUGC  
>hsa-mir-615 MI0003628  
CUCGGGAGGGGCGGGAGGGGGUCCCCGGUGCUCGGAUCUCGAGGGUGCUUAUUGUUCGGUCCGA  
GCCUGGGUCUCCUCUUCUCCCCCAACCCCC  
>hsa-mir-616 MI0003629  
UUAGGUAAUUCUCCACUCAAAAACCCUUCAGUGACUCCAUGACAUGAAAUAGGAAGUCAUUGGA  
GGGUUUGAGCAGAGGAAUGACCUGUUUUAAAA  
>hsa-mir-617 MI0003631  
CAUCAUAAGGAGCCUAGACUCCCAUUUGAAGGUGGCCAUUCCUACCACCUUCAAAUGGUAAGU  
CCAGGCUCUUCUGAUUCAAAUAAAUGAGGAGC  
>hsa-mir-618 MI0003632  
CUCUUGUUCACAGCCAAACUCUACUUGUCCUUCUGAGUGUAAUUACGUACAUGCAGUAGCUCAGG  
AGACAAGCAGGUUUACCCUGUGGAUGAGUCUGA  
>hsa-mir-619 MI0003633  
CGCCCACCUCAGCCUCCCAAAAUGCUGGGAUUACAGGCAUGAGCCACUGCGGUCGACCAUGACCU  
GGACAUGUUUGUGCCCAGUACUGUCAGUUUGCAG  
>hsa-mir-620 MI0003634  
AUUAUAUAUCUAUAUCUAGCUCCGUAUAUAUAUAUAUAUAUAUAUAGUAUUCUCAUAUAUAUGGA  
GAUAGAUUAAGAAUAAAACAAGCAAAGAA  
>hsa-mir-621 MI0003635  
UAGAUUGAGGAAGGGGUGAGUGGUAGGCGGUGCUGCUGUGCUCUGAUGAAGACCCAUGUGGCUA  
GCAACAGCGCUUACCUUUUGUCUCUGGGUCC  
>hsa-mir-622 MI0003636  
AGAGAAGCUGGACAAGUACUGGUCUCAGCAGAUUGAGGAGAGCACCACAGUGGUCAUCACACAGU  
CUGCUGAGGUUGGAGCUGCUGAGAUGACACU  
>hsa-mir-623 MI0003637  
GUACACAGUAGAAGCAUCCUUGCAGGGGCUGUUGGGUUGCAUCCUAAGCUGUGCUGGAGCUUCC  
CGAUGUACUCUGUAGAUGUCUUUGCACCUUCUG  
>hsa-mir-624 MI0003638  
AAUGCUGUUUCAAGGUAGUACCAGUACCUUGUGUUCAGUGGAACCAAGGUAAAACAAGGUUAUUG  
GUAUUACCUUGAGAUAGCAUUACACCUAAGUG

---

>hsa-mir-625 MI0003639  
AGGGUAGAGGGAUGAGGGGGAAAGUUCUAUAGUCCUGUAAUJAGAUCUCAGGACUAUAGAACUUU  
CCCCUCAUCCCUCUGCCCU

>hsa-mir-626 MI0003640  
ACUGAUUAUUUGUCUUAUUUGAGAGCUGAGGAGUAUUUUUAUGCAAUCUGAAUGAUCUCAGCUG  
UCUGAAAAUGUCUCAAUUUUAAAAGGCUU

>hsa-mir-627 MI0003641  
UACUUAUUACUGGUAGUGAGUCUCUAAGAAAAGAGGAGGUGGUUGUUUCCUCUUCUUUCUUUG  
AGACUCACUACCAAUAUAAGAAAUACUACUA

>hsa-mir-628 MI0003642  
AUAGCUGUUGUGUCACUUCUCAUGCUGACAUAUUUACUAGAGGGUAAAAUUAUAACCUUCUAG  
UAAGAGUGGCAGUCGAAGGGAAGGGCUCAU

>hsa-mir-629 MI0003643  
UCCCUUCCCAGGGGAGGGGCGUGGGUUUACGUUGGGAGAACUUUUACGGUGAACCAGGAGGUUCU  
CCCAACGUAAGCCCAGCCCCUCCCUUCUGCCU

>hsa-mir-630 MI0003644  
AACUUAACAUC AUGCUACCUCUUUGUAUCAUAUUUUGUUAUUCUGGUCACAGAAUGACCUAGUAU  
UCUGUACCAGGGAAGGUAGUUCUUAACUAUAU

>hsa-mir-631 MI0003645  
GUGGGGAGCCUGGUUAGACCUGGCCAGACCUCAGCUACACAAGCUGAUGGACUGAGUCAGGGGC  
CACACUCUCC

>hsa-mir-632 MI0003647  
CGCCUCCUACCGCAGUGCUUGACGGGAGGCGGAGCGGGGAACGAGGCCGUCGGCCAUUUUGUGUC  
UGCUCUCCUGUGGGACGUGGGUAGCCGU

>hsa-mir-633 MI0003648  
AACCUCUCUAGCCUCUGUUUCUUUAUUGCGGUAGAUACUAUUAACCUAAAAUGAGAAGGCUAUU  
AGUAUCUACCACAAUAAAAUUGUUGUGAGGAUA

>hsa-mir-634 MI0003649  
AAACCCACACCACUGCAUUUUGGCAUCGAGGGUUGGGGCUUGGUGUCAUGCCCCAAGAUAAACA  
GCACCCCAACUUUGGACAGCAUGGAUUAGUCU

>hsa-mir-635 MI0003650  
CAGAGAGGAGCUGCCACUUGGGCACUGAAACAAUGUCCAUAUAGGCUUUGUUAUGGAAACUUCUCC  
UGAUCAUUGUUUUGUGUCAUUGAGCUUCCAAU

>hsa-mir-636 MI0003651  
UGGCGGCCUGGGCGGGAGCGCGGGGCGGGGCCCGGCCCGCUGCCUGGAAUUAACCCCGCUGUGC  
UUGCUCGUCCCGCCCGCAGCCCUAGGCGGCGUCG

>hsa-mir-637 MI0003652  
UGGCUAAGGUGUUGGCUCGGGCUCCCCACUGCAGUUACCUCUCCUCCGCGGUUACUGAGCACUGG  
GGGCUUUCGGGCUCUGCGUCUGCACAGAUACUUC

>hsa-mir-638 MI0003653  
GUGAGCGGGCGCGGAGGGAUCGCGGGCGGGUGGCGGCCUAGGGCGCGGAGGGCGGACCGGGAU  
GGCGCGCCGUGCGCCGCGGCGUAACUGCGGCGCU

>hsa-mir-639 MI0003654  
UGGCCGACGGGGCGCGCGGCCUUGAGGGGCGGGGCGGACGCAGAGCCGCGUUUAGUCUAUCGC

UGCGGUUGCGAGCGCUGUAGGGAGCCUGUGCUG  
>hsa-mir-640 MI0003655  
GUGACCCUGGGCAAGUUCUGAAGAUCAAGACACAUCAGAUCCCUUAUCUGUAAAAUGGGCAUGAU  
CCAGGAACCUGCCUCUACGGUUGCCUUGGGG  
>hsa-mir-641 MI0003656  
UGGGUGAAAGGAAGGAAAGACAUAAGGAUAGAGUCACCUCUGUCCUCUGUCCUCUACCUAUAGAGG  
UGACUGUCCUAUGUCUUUCCUUCUUCUACCCCU  
>hsa-mir-642a MI0003657  
AUCUGAGUUGGGAGGGUCCUCUCCAAAUGUGUCUUGGGGUGGGGGAUCAAGACACAUUUGGAGA  
GGGAACCUCCCAACUCGGCCUCUGCCAUAUU  
>hsa-mir-643 MI0003658  
ACCAAGUGAUUUAUUGUCUACCUGAGCUAGAAUACAAGUAGUUGGCGUCUUCAGAGACACUUG  
UAUGCUAGCUCAGGUAGAUUUGAAUGAAAA  
>hsa-mir-644a MI0003659  
UUUUUUUUUAGUAUUUUUCCAUCAGUGUUAUAAGGAAUGUUGCUCUGUAGUUUUUCUUAUAGUGU  
GGCUUUCUAGAGCAAAGAUGGUUCCCUA  
>hsa-mir-645 MI0003660  
CAGUUCUUAACAGGCCUCAGACCAGUACCGGUCUGUGGCCUGGGGGUUGAGGACCCUCGUCUAG  
GCUGGUACUGCUGAUGCUUAAAAAGAGAG  
>hsa-mir-646 MI0003661  
GAUCAGGAGUCUGCCAGUGGAGUCAGCACACCUGCUUUUCACCUGUGAUCCCAGGAGAGGAAGCA  
GCUGCCUCUGAGGCCUCAGGCUCAGUGGC  
>hsa-mir-647 MI0003662  
AGGAAGUGUUGGCCUGUGGCUCACUCACUUCUUCAGCCCCAGGAAGCCUUGGUCGGGGGCAGG  
AGGGAGGGUCAGGCAGGGCUGGGGGCCUGAC  
>hsa-mir-648 MI0003663  
AUCACAGACACCUC AAGUGUGCAGGGCACUGGUGGGGGCCGGGGCAGGCCAGCGAAAGUGCAG  
GACCUGGCACUAGUCGGAAGUGAGGGUG  
>hsa-mir-649 MI0003664  
GGCCUAGCCAAUACUGUAUUUUUGAUCGACAUUUGGUUGAAAAUAUCUAUGUAUUAGUAAACC  
UGUGUUGUUAAGAGUCCACUGUGUUUUGCUG  
>hsa-mir-650 MI0003665  
CAGUGCUGGGGUCUCAGGAGGCAGCGCUCUCAGGACGUCACCACCAUGGCCUGGGCUCUGCUCCU  
CCUCACCCUCCUCACUCAGGGCACAGGUGAU  
>hsa-mir-651 MI0003666  
AAUCUAUCACUGCUUUUAGGAUAAGCUUGACUUUUGUCAAUAAAAUGCAAAAGGAAAGUGU  
AUCCUAAAAGGCAAUGACAGUUAAUGUGUUU  
>hsa-mir-652 MI0003667  
ACGAAUGGCUAUGCACUGCACAACCCUAGGAGAGGGUGCCAUUCACAUAGACUAUAAUUGAAUGG  
CGCCACUAGGGUUGUGCAGUGCACAACCUACAC  
>hsa-mir-653 MI0003674  
UUCAUCCUUCAGUGUUGAAACAAUCUCUACUGAACCCAGCUCAAACAAGUUCACUGGAGUUUGU  
UUCAAUAUUGCAAGAAUGAUAGAUGGAAGC  
>hsa-mir-654 MI0003676

---

GGGUAAGUGGAAAGAUGGUGGGCCGCAGAACAUGUGCUGAGUUCGUGCCAUAUGUCUGCUGACCA  
UCACCUUUAGAAGCCC  
>hsa-mir-655 MI0003677  
AACUAUGCAAGGAUAUUUGAGGAGAGGUUAUCCGUGUUAUGUUCGCUUCAUUAUCAUGAAUAAU  
ACAUGGUUAACCCUCUUUUUGAAUAUCAGACUC  
>hsa-mir-656 MI0003678  
CUGAAAUAAGGUJGCCUGUGAGGUGUUCACUUUCUAUAUGAUGAAUAUUUAUACAGUCAACCUCUUU  
CCGAUAUCGAAUC  
>hsa-mir-657 MI0003681  
GUGUAGUAGAGCUAGGAGGAGAGGGUCCUGGAGAAGCGUGGACCGGUCCGGGUGGGUUCGGCAG  
GUUCUCACCCUCUCUAGGCCCAUUCUCCUCUG  
>hsa-mir-658 MI0003682  
GCUCGGUUGCCGUGGUUGCGGGCCUGCCCGCCCGCCAGCUCGCUGACAGCACGACUCAGGGCGG  
AGGGAAGUAGGUCCGUUGGUCGGUCGGGAACGAGG  
>hsa-mir-659 MI0003683  
UACCGACCCUCGAUUUGGUUCAGGACCUUCCUGAACCAAGGAAGAGUCACAGUCUCUCCUUGG  
UUCAGGGAGGGUCCCAACAAUGUCCUCAUG  
>hsa-mir-660 MI0003684  
CUGCUCUUCUCCCAUACCCAUUGCAUAUCGGAGUUGUGAAUUCUAAAACACCUCUGUGUGCA  
UGGAUUACAGGAGGGUGAGCCUUGUCAUCGUG  
>hsa-mir-661 MI0003669  
GGAGAGGCUGUGCUGUGGGGCAGGCGCAGGCCUGAGCCCUGGUUUCGGGCUGCCUGGGUCUCUGG  
CCUGCGCGUGACUUUGGGGUGGCU  
>hsa-mir-662 MI0003670  
GCUGUUGAGGCUGCGCAGCCAGGCCUGACGGUGGGGUGGCUGCGGGCCUUCUGAAGGUCUCCCA  
CGUUGUGGCCAGCAGCGCAGUCACGUUGC  
>hsa-mir-663b MI0006336  
GGUGCCGAGGGCCGUCCGGCAUCCUAGGCGGGUCGCUGCGGUACCUCUCCUGUCUGUGGGCGGU  
GGGAUCCCGUGGCCGUGUUUCCUGGUGGCCCGGCCGUGCCUGAGGUUUC  
>hsa-mir-664a MI0006442  
GAACAUGAAACUGGCUAGGGAAAAUGAUUGGAUAGAAACUAUUAUUCUAUUCAUUUAUCCCCAG  
CCUACAAAUGAAAAA  
>hsa-mir-665 MI0005563  
UCUCCUCGAGGGGUCUCUGCCUCUACCCAGGACUCUUUCAUGACCAGGAGGCUGAGGCCCCUCAC  
AGGCGGC  
>hsa-mir-668 MI0003761  
GGUAAGUGC GCCUCGGGUGAGCAUGCACUUA AUGUGGGUGUAUGUCACUCGGCUCGGCCACUAC  
C  
>hsa-mir-670 MI0003933  
GUUUAGGGGUGGACCUGAUGUCCUGAGUGUAUGUGGUGAACCGAAUUUGCCUUGGGUUUCCUC  
AUUAUCAUUCAGGAGUGUCAGUUGCCCCUUCAC  
>hsa-mir-671 MI0003760  
GCAGGUGAACUGGCAGGCCAGGAAGAGGAGGAAGCCCUGGAGGGGCUGGAGGUGAUGGAUGUUU  
CCUCCGUUUCUCAGGGCUCACCUCUUUCGGGCCGUAGAGCCAGGGCUGGUGC

---

>hsa-mir-675 MI0005416  
CCCAGGGUCUGGUGCGGAGAGGGCCACAGUGGACUUGGUGACGCUGUAUGCCCUCACCGCUCAG  
CCCCUGGG

>hsa-mir-676 MI0016436  
GCAUGACUCUUAACCUCAGGACUUGCAGAAUUAUGGAAUGCUGUCCUAAGGUUGUUGAGUUGU  
GC

>hsa-mir-708 MI0005543  
AACUGCCCUCAAGGAGCUUACAAUCUAGCUGGGGUAAAUGACUUGCACAUGAACACAACUAGAC  
UGUGAGCUUCUAGAGGGCAGGGA

>hsa-mir-711 MI0012488  
ACUGACUUUGAGUCUCUCCUCAGGGUGCUGCAGGCAAAGCUGGGGACCCAGGGAGAGACGUAAGU  
GAGGGGAGAUG

>hsa-mir-718 MI0012489  
GGCCGCGGCGCAAGAUGGCGGCGGGCCCGGGCACCGCCCUUCCGCCCCGCCGGGCGUCGCAC  
GAGGC

>hsa-mir-744 MI0005559  
UUGGGCAAGGUGCGGGCUAGGGCUAACAGCAGUCUUAACUGAAGGUUCCUGGAAACCACGCACA  
UGCUGUUGCCACUAACCUCUACCUUACUCGGUC

>hsa-mir-758 MI0003757  
GCCUGGAUACAUGAGAUGGUUGACCAGAGAGCACACGCUUUAUUUGGCCGUUUGUGACCUGGUC  
CACUAACCCUCAGUAUCUAAUGC

>hsa-mir-759 MI0004065  
UAAUAAAUAUAAUGCCUAAACUGGCAGAGUGCAAACAUAUUUGACUCAGAUCUAAAUGUUUGCAC  
UGGCUGUUUAAACAUAUUAAUUUGUUA

>hsa-mir-760 MI0005567  
GGCGGUCGCCCCCUCAGUCCACCAGAGCCCGGAUACCUCAGAAUUCGGCUCUGGGUCUGUGG  
GGAGCGAAAUGCAAC

>hsa-mir-761 MI0003941  
GGAGGAGCAGCAGGGUGAAACUGACACAGUUCUGGUGAGUUUCACUUUGCUGCUCCUCC

>hsa-mir-762 MI0003892  
GGCCCGGCUCCGGGUCUCGGCCGUACAGUCCGGCCGGCAUGCUGGCGGGGCUGGGGCCGGGGC  
CGAGCCCGCGCGGGGCC

>hsa-mir-764 MI0003944  
AAUCUAGGAGGCAGGUGCACUUGUCCUCCUCCAUGCUGGAAAUGCAGGGAGGAGGCCAUAG  
UGGCAACUGUUACCAUGAUU

>hsa-mir-765 MI0005116  
UUUAGGCGCUGAUGAAAGUGGAGUUCAGUAGACAGCCUUUUCAGCCUACGAGAAACUGGGGU  
UUCUGGAGGAGAAGGAAGGUGAUGAAGGAUCUGUUCUCGUGAGCCUGAA

>hsa-mir-766 MI0003836  
GCAUCCUCAGGACCUGGGCUUGGGUGGUAGGAGGAAUUGGUGCUGGUCUUUCAUUUUGGAUUUGA  
CUCCAGCCCCACAGCCUCAGCCACCCAGCCAAUUGUCAUAGGAGC

>hsa-mir-767 MI0003763  
GCUUUUAUAUUGUAGGUUUUUGCUCAUGCACCAUGGUUGUCUGAGCAUGCAGCAUGCUCUGUCGC  
UCAUACCCCAUGGUUUCUGAGCAGGAACCUUCAUUGUCUACUGC

---

>hsa-mir-769 MI0003834  
GCCUUGGUGCUGAUUCCUGGGCUCUGACCUGAGACCUCUGGGUUCUGAGCUGUGAUGUUGCUCUC  
GAGCUGGGAUCUCCGGGGUCUUGGUUCAGGGCCGGGGCCUCUGGGUCCAAGC

>hsa-mir-770 MI0005118  
AGGAGCCACCUUCCGAGCCUCCAGUACCACGUGUCAGGGCCACAUGAGCUGGGCCUCGUGGGCCU  
GAUGUGGUGCUGGGGCCUCAGGGGUCUGCUCUU

>hsa-mir-802 MI0003906  
GUUCUGUUUUGCAGUCAGUAACAAAGAUUCAUCCUUGUGUCCAUCAUGCAACAAGGAGAAUCU  
UUGUCACUUAGUGUAAUUAUAGCUGGAC

>hsa-mir-873 MI0005564  
GUGUGCAUUGCAGGAACUUGUGAGUCUCCUAUUGAAAUGAACAGGAGACUGAUGAGUCCCCG  
GAACACCCACAA

>hsa-mir-874 MI0005532  
UUAGCCCUGCGGCCCCACGCACCAGGGUAAGAGAGACUCUCGCUUCCUGCCCUGGCCCGAGGGAC  
CGACUGGCUGGGC

>hsa-mir-875 MI0005541  
UUAGUGGUACUAUACCUCAGUUUAUCAGGUGUUCUUAUAAAUCACCUGGAAACACUGAGGUUGUG  
UCUCACUGAAC

>hsa-mir-876 MI0005542  
UGAAGUGCUGUGGAUUUCUUUGUGAAUCACCAUAUCUAAGCUAAUGUGGUGGUGUUUACAAAGU  
AAUUCAUAGUGCUUCA

>hsa-mir-877 MI0005561  
GUAGAGGAGAUUGGCGCAGGGGACACGGGCAAAGACUUGGGGGUUCUGGGACCCUCAGACGUGUG  
UCCUCUUCUCCCUCCUCCAG

>hsa-mir-885 MI0005560  
CCGCACUCUCUCCAUAUACACUACCCUGCCUCUUCUCCAUGAGAGGCAGCGGGGUGUAGUGGAUAG  
AGCACGGGU

>hsa-mir-887 MI0005562  
GUGCAGAUCCUUGGGAGCCCUGUUAGACUCUGGAUUUUACACUUGGAGUGAACGGGCGCCAUCCC  
GAGGCUUUGCACAG

>hsa-mir-888 MI0005537  
GGCAGUGCUCUACUCAAAAAGCUGUCAGUCACUUAGAUUACAUGUGACUGACACCUCUUUGGGUG  
AAGGAAGGCUCA

>hsa-mir-889 MI0005540  
GUGCUIAAAGAAUGGCUGUCCGUAGUAUGGUCUCUAUAUUUAUGAUGAUUAAUAUCGGACAACCA  
UUGUUUJAGUAUCC

>hsa-mir-890 MI0005533  
GGAAGUGCCUACUUGGAAAGGCAUCAGUUGCUUAGAUUACAUGUAACUAUUCUUUCUGAGUA  
GAGUAAGUCUUA

>hsa-mir-891a MI0005524  
CCUUAUCCUUGCAACGAACCUGAGCCACUGAUUCAGUAAAAUACUCAGUGGCACAUGUUUGUUG  
UGAGGGUCAAAAAGA

>hsa-mir-892b MI0005538  
UGCAAUGCCCUACUCAGAAAGGUGCCAUUUAUGUAGAUAUUUAUGUCACUGGCUCUUUCUGGGUA



GAGCAAGGCUCA  
>hsa-mir-920 MI0005712  
GUAGUUGUUCUACAGAAGACCUGGAUGUGUAGGAGCUAAGACACACUCCAGGGGAGCUGUGGAAG  
CAGU AACACG  
>hsa-mir-921 MI0005713  
ACUAGUGAGGGACAGAACCAGGAUUCAGACUCAGGUCCAUGGGCCUGGAUCACUGG  
>hsa-mir-922 MI0005714  
AUGGCGUUUCCUCUCCUGUCCUGGACUGGGGUCAGACUGUGCCCCGAGGAGAAGCAGCAGAG  
AAUAGGACUACGUCAU  
>hsa-mir-924 MI0005716  
AAUAGAGUCUUGUGAUGUCUUGCUUAAGGGCCAUCCAACCUAGAGUCUACAAC  
>hsa-mir-933 MI0005755  
ACUUGGGUCAGUUCAGAGGUCCUCGGGGCGCGGUCGAGUCAGCCGUGUGCGCAGGGAGACCUCU  
CCCACCCACAGU  
>hsa-mir-934 MI0005756  
AGAAAUAAGGCUUCUGUCUACUACUGGAGACACUGGUAGUAUAAAACCCAGAGUCUCCAGUAAUG  
GACGGGAGCCUUAUUUCU  
>hsa-mir-935 MI0005757  
GGCGGGGGCGCGGGCGGCAGUGGCGGGAGCGGCCCCUCGGCCAUCCUCCGUCUGCCCAGUUACCG  
CUUCCGCUACCGCCCGCCUCUCCCGCU  
>hsa-mir-936 MI0005758  
UCAAGGCCACUGGGACAGUAGAGGGAGGAAUCGCAGAAAUCACUCCAGGAGCAACUGAGAGACCU  
UGCUUCUACUUUACCAGGUCCUGCUGGCCCAGA  
>hsa-mir-937 MI0005759  
AGCACUGCCCCCGUGAGUCAGGGUGGGGCGUGGCCCCUUGCUUCGUGCCCAUCCGCGCUCUGACU  
CUCUGCCCACCUGCAGGAGCU  
>hsa-mir-938 MI0005760  
GAAGGUGUACCAUGUGCCCUAAAAGGUGAACCAGUGCACCUCUAUGAACCGUGGUACACCUUUA  
AGAACUUGGUAUGCCUUC  
>hsa-mir-939 MI0005761  
UGUGGGCAGGGCCCUGGGGAGCUGAGGCUCUGGGGGUGGCCGGGGCUGACCCUGGGCCUCUGCUC  
CCCAGUGUCUGACCGCG  
>hsa-mir-940 MI0005762  
GUGAGGUGUGGGCCCGCCCCAGGAGCGGGGCCUGGGCAGCCCCGUGUGUUGAGGAAGGAAGGCA  
GGGCCCCCGCUCUCCGGGCCUGACCCAC  
>hsa-mir-941-1 MI0005763  
UGUGGACAUGUGCCAGGGCCCCGGGACAGCGCCACGGAAGAGGACGCACCCGGCUGUGUGCACAU  
GUGCCCA  
>hsa-mir-942 MI0005767  
AUUAGGAGAGUAUCUUCUCUGUUUUGGCAUGUGUGUACUCACAGCCCCUCACACAUGGCCGAAA  
CAGAGAAGUUACUUCCUAAU  
>hsa-mir-943 MI0005768  
GGGACGUUCUGAGCUCGGGGUGGGGGACGUUUGCCGGUCACUGCUGCUGGGCGCCUGACUGUJGC  
CGUCCUCCAGCCCCACUCAAGGCAUCCC

---

>hsa-mir-944 MI0005769  
GUUCCAGACACAUCUCAUCUGAUUAUACAUAUUUUUCUAAAUUGUAUAAAGAGAAAUAUUGUAC  
AUCGGAUGAGCUGUGUCUGGGAU

>hsa-mir-1178 MI0006271  
GCGUUGGCUGGCAGAGGAAGGGAAGGGUCCAGGGUCAGCUGAGCAUGCCCUCAGGUUGCUCACUG  
UUCUUCUUAGAAUGUCAGGUGAUGU

>hsa-mir-1179 MI0006272  
GGCUGGAAAGGAAGAAGCAUUCUUUCAUUGGUUGGUGUGUAUUGCCUUGUCAACCAAUAAGAGGA  
UGCCAUUUAUCCUUUUCUGACUAGCU

>hsa-mir-1180 MI0006273  
GCUGCUGGACCCACCCGGCCGGAAUAGUGCUCUGGUUGUJUCCGGCUCGCGUGGGUGUGUCGG  
CGGC

>hsa-mir-1181 MI0006274  
UCCACUGCUGCCGCCGUCGCCGCCACCCGAGCCGGAGCGGGCUGGGCCGCCAAGGCAAGAUGGUG  
GACUACAGCGUGUGGG

>hsa-mir-1182 MI0006275  
GGGACUUGUCACUGCCUGUCUCCUCCUCUCCAGCAGCGACUGGAUUCUGGAGUCCAUCUAGAGG  
GUCUUGGGAGGGAUGUGACUGUUGGGGAAGCCC

>hsa-mir-1183 MI0006276  
AUUAUUCAAAUGCUCGGAGACACAGAACAUAUAGAGAAGACAGGAGUUCACUGUAGGUGAUGGUGA  
GAGUGGGCAUGGAGCAGGAGUGCC

>hsa-mir-1184-1 MI0006277  
CUUGCAGAACGAGGUGAAGGAGGUGGUUCUGCUCAGCAGUCAACAGUGGCCACAUCUCCACCUGC  
AGCGACUUGAUGGCUUCCGUGUCCUUUUCGUGGG

>hsa-mir-1185-1 MI0003844  
UUUGGUACUUGAAGAGAGGAUACCCUUUGUAUGUUCACUUGAUJAAUGGCGAAUAUACAGGGGGA  
GACUCUUUUUGCGUAUCAA

>hsa-mir-1193 MI0014205  
GUAGCUGAGGGGAUGGUAGACCGGUGACGUGCACUUCAUUUACGAUGUAGGUCACCCGUUUGACU  
AUCCACCAGCGCC

>hsa-mir-1197 MI0006656  
ACUUCCUGGUUUUGAAGAUGCGGUUGACCAUGGUGUGUACGCUUUAUUUGUGACGUAGGACACA  
UGGUCUACUUCUUCUCAAUAUCA

>hsa-mir-1199 MI0020340  
AGCCUGCGCCGGAGCCGGGGCCUGAGCCCAGGGCCGCGCAGGCGGUGAACUCGUCGAGCUGCGCGU  
GCGGCCGGUGCUCUACCCUGCCGGGUCCUGGCCCCGCGCUCUCCGCGCGCCCUGGA

>hsa-mir-1200 MI0006332  
UGCUCUUCUCCUGAGCCAUUCUGAGCCUCAAUCACUUGCCAGAGAGAUUGGUUCAGGAAUUGU  
CAGGGAUAGCC

>hsa-mir-1202 MI0006334  
CCUGCUCGAGAGGUGCCAGCUCGAGUGGGGGAGGCACUGCCAGGGCUGCCCACUCUGCUUAGCCA  
GCAGGUGCCAAGAACAGG

>hsa-mir-1203 MI0006335  
UCCUCCCCGGAGCCAGGAUGCAGCUCUAGCCACAGCAGGGUGUUUAGCGCUCUUCAGUGGCUCCA

GAUUGUGGCGCUGGUGCAGG  
>hsa-mir-1204 MI0006337  
ACCUCGUGGCCUGGUCUCCAUAUUUGAGAUGAGUUACAUCUUGGAGGUGAGGACGUGCCUCGUG  
GU  
>hsa-mir-1205 MI0006338  
GAAGGCCUCUGCAGGGUUUGCUUUGAGGUACUUCUCCUGUCAACCCUGUUCUGGAGUCUGU  
>hsa-mir-1206 MI0006339  
CAGUGUUCAUGUAGAUGUUUAAGCUCUUGCAGUAGGUUUUUGCAAGCUAGUGAACGCUG  
>hsa-mir-1207 MI0006340  
GCAGGGCUGGCAGGGAGGCUGGGAGGGCUGGCUGGGUCUGGUAGUGGGCAUCAGCUGGCCCUCA  
UUUCUUAAGACAGCACUUCUGU  
>hsa-mir-1208 MI0006341  
CACCGGCAGAAUCACUGUUCAGACAGGCGGAGACGGGUUCUUCUCGCCUCUGAUGAGUCACCAC  
UGUGGUGG  
>hsa-mir-1224 MI0003764  
GUGAGGACUCGGGAGGUGGAGGGUGGUGCCGCCGGGGCCGGGCGCUGUUUCAGCUCGCUUCUCCC  
CCCACCUCCUCUCUCCUCAG  
>hsa-mir-1225 MI0006311  
GUGGGUACGGCCAGUGGGGGGAGAGGGACACGCCUCUGGGCUCUGCCCAGGGUGCAGCCGGACU  
GACUGAGCCCCUGUGCCGCCCCCAG  
>hsa-mir-1226 MI0006313  
GUGAGGGCAUGCAGGCCUGGAUGGGGCAGCUGGGAUGGUCCAAAAGGGUGGCCUCACCAGCCCUG  
UGUUCCCUAG  
>hsa-mir-1227 MI0006316  
GUGGGGCCAGGCGGUGGUGGGCACUGCUGGGGUGGGCACAGCAGCCAUGCAGAGCGGGCAUUUGA  
CCCCGUGCCACCCUUUCCCCAG  
>hsa-mir-1228 MI0006318  
GUGGGCGGGGCAGGUGUGUGGUGGGUGGUGCCUGCGGUGAGCAGGGCCUCACACCUGCCUCG  
CCCCCAG  
>hsa-mir-1229 MI0006319  
GUGGGUAGGGUUUGGGGAGAGCGUGGGCUGGGGUUCAGGGACACCCUCUCACCACUGCCUCCC  
ACAG  
>hsa-mir-1231 MI0006321  
GUCAGUGUCUGGGCGGACAGCUGCAGGAAAGGGAAGACCAAGGCUUGCUGUCUGUCCAGUCUGCC  
ACCCUACCCUGUCUGUUCUUGCCACAG  
>hsa-mir-1233-1 MI0006323  
GUGAGUGGGAGGCCAGGGCACGGCAGGGGAGCUGCAGGGCUAUGGGAGGGGCCCCAGCGUCUGA  
GCCUUGUCCUCCCGCAG  
>hsa-mir-1234 MI0006324  
GUGAGUGUGGGGUGGCUGGGGGGGGGGGGGGGGGGGCCGGGACGGCUUGGGCCUGCCUAGUCGGC  
CUGACCACCCACCCACAG  
>hsa-mir-1236 MI0006326  
GUGAGUGACAGGGGAAAUGGGGAUGGACUGGAAGUGGGCAGCAUGGAGCUGACCUUCAUCAUGGC  
UUGGCCAACAUAAUGCCUCUCCCCUUGUCUCUCCAG

---

>hsa-mir-1237 MI0006327  
GUGGGAGGGCCCAGGCGCGGGCAGGGGUGGGGUGGCAGAGCGCUGUCCCCGGGGCGGGGCCGAA  
GCGCGGCGACCGUAACUCCUUCUGCUCGUCGCCCCAG

>hsa-mir-1238 MI0006328  
GUGAGUGGGAGCCCCAGUGUGUGGUUGGGCCAUGGCGGGUGGGCAGCCCAGCCUCUGAGCCUUC  
CUCGUCUGUCUGCCCCAG

>hsa-mir-1243 MI0006373  
CUAAAAUCUGGAUCAAUUAUAGGAGUGAAAUAAGGUCCAUCUCCUGCCUAUUUAUUACUUUGCUU  
UGGUAAUAAAUCUAUUUUUAAAAGAACC

>hsa-mir-1244-1 MI0006379  
AUCUUAUUCGAGCAUUCAGUAACUJUJUUGUGUAUGUACUJAGCUGUACUAUAAGUAGUUGGU  
UUGUAUGAGAUGGUUAAAAA

>hsa-mir-1245a MI0006380  
AUUUUAUGUAUAGGCCUUUAGAUCAUUCUGAUGUUGAAUACUCUJUUAAGUGAUCUAAAAGGCCUACAU  
AUAAA

>hsa-mir-1245b MI0017431  
UUUAUAUGUAGGCCUUUAGAUCACUUAAGAGUAUUCAACAUCAGAUGAUCUAAAAGGCCUAUACA  
UAAA

>hsa-mir-1246 MI0006381  
UGUAUCCUUGAAUGGAUUUUUGGAGCAGGAGUGGACACCUGACCCAAAGGAAAUCAAUCCAUAGG  
CUAGCAAU

>hsa-mir-1247 MI0006382  
CCGCUUGCCUCGCCCAGCGCAGCCCCGGCCGUGGGCGCACCCGUCGCGUUCGUCGCCCCGGACGUU  
GCUCUCUACCCCGGGAACGUCGAGACUGGAGCGCCCGAACUGAGCCACCUUCGCGGACCCCGAGA  
GCGGCG

>hsa-mir-1248 MI0006383  
UUUACCUUCUUGUAUAAGCACUGUGC UAAAAUUGCAGACACUAGGACCAUGUCUUGGUUUUUGCA  
AUAAUGC UAGCAGAGUACACACAAGAAGAAAAGUAACAGCA

>hsa-mir-1249 MI0006384  
GGGAGGAGGGAGGAGAUGGGCCAAGUUCUCCUCUGGCUGGAACGCCUUCUCCCCCUUCUUCACCU  
G

>hsa-mir-1250 MI0006385  
CUGUCCCGCUGGCCUGGCAGGUGACGGUGCUGGAUGUGGCCUUUUUGCCUUUUCUAAAAGGCCACA  
UUUUCAGCCAUUCAACCUUCCAGAGCCUCUGAAGUGGCCACAGGC

>hsa-mir-1251 MI0006386  
GUGGACUCUAGCUGCCAAAGGCGUUCUCCUUCUGAACAGAGCGCUUUGCUCAGCCAGUGUAGAC  
AUGGC

>hsa-mir-1252 MI0006434  
AGAAAGAAGGAAUUGAAUUCAUUUAGAAAAGAGAAUCCAAAUGAGCUUAAUUCCUUUUUUCU

>hsa-mir-1253 MI0006387  
AGCAGCAAGAGAUAGAAUCCAAAAGAGAAGAAGAUACAGCCUGCAGAUGUGGACUGCUAAAUGCAG  
GCUGAUCUUCUCCCCUUGGGAUUCUCUUAUGAGAAGCCA

>hsa-mir-1254-1 MI0006388  
GGUGGGAGGAUUGCUUGAGCCUGGAAGCUGGAGCCUGCAGUGAACUAUCAUUGUGCCACUGUACU

CCAGCCUAGGCAACAAAUGAAAUCCUGUCUA  
>hsa-mir-1255a MI0006389  
AUUGGAAUCCUUUGAGUUGCUUCUCAAGGAUGAGCAAAGAAAGUAGAUUUUUUAGAUUCUAAAG  
AAACUAUCUUCUUUGUCUCAUCCUUGAGAAGCAACUCCUUAUCCAUAUA  
>hsa-mir-1255b-1 MI0006435  
UACGGGAUGAGCAAAGAAAGUGGUUUCUAAAAUGGAAUCUACUCUUGUGAGAAGAUUGCUGUGAA  
>hsa-mir-1255b-2 MI0006436  
UCUUACGGGAUGAGCAAAGAAAGUGGUUUGCGCCUCAAGAAACCACUUUCUUUGUCUCAUCCAUAAG  
GA  
>hsa-mir-1256 MI0006390  
AGUCAGCCUGUUGAAGCUUUGAAGCUUUGAUGCCAGGCAUUGACUUCUCACUAGCUGUGAAAGUC  
CUAGCUAAAGAGAAGUCA AUGCAUGACAUCUUGUUCAAUAGAUGGCUGUUUCA  
>hsa-mir-1257 MI0006391  
GCCCUUGGCUUGUGCUUGGGGAGUGAAUGAUGGGUUCUGACCCCAUGCACCCCUUGGGCCCCU  
GGCAUCACUGGCCCAUCCUUCACCCUGCCAACCACGCUUGCCCUGUGCCU  
>hsa-mir-1258 MI0006392  
CUGUGGCUUCCACGACCUA AUCCUAACUCCUGCGAGUCCCUUGGAGUUAGGAUUAGGUCGUGGAAG  
CCACAGGA  
>hsa-mir-1260a MI0006394  
ACCUUCCAGCUCAUCCACCUCUGCCACCAAACACUCAUCGCGGGGUCAGAGGGAGUGCCAAA  
AAAGGUAA  
>hsa-mir-1260b MI0014197  
UCUCCGUUUAUCCACCACUGCCACCAUUAUUGCUACUGUUCAGCAGGUGCUGCUGGGUGGUGAUG  
GUGAUAGUCUGGUGGGGGCGGUGG  
>hsa-mir-1261 MI0006396  
UGCUAUGGAUAAGGCUUUGGCUUAUGGGGAUAUUGUGGUUGAUCUGUUCUAUCCAGAUGACUGAA  
ACUUUCUCCAUAGCAGC  
>hsa-mir-1262 MI0006397  
AUCUACAAUGGUGAUGGGUGAAUUGUAGAAGGAUGAAAGUCAAGAAUCCUUCUGGGAACUAAU  
UUUUGGCCUUCAACAAGAAUUGUGAUAU  
>hsa-mir-1263 MI0006398  
CUACCCCAAUAUUGGUACCCUGGCAUACUGAGUAUUUUAUACUGGCAUACUCAGUAUGCCAUG  
UUGCCAUAUUUUGGGUAGCA  
>hsa-mir-1264 MI0003758  
AGGUCCUCAUAAGUAUUUGUUGAAAGAAUAAAUAACCAACAAGUCUUAUUUGAGCACCUGUUA  
UGUG  
>hsa-mir-1265 MI0006401  
AUGGUUUGGACUCAGGAUGUGGUCAAGUGUUGUUAAGGCAUGUUCAGGAACAAUACUUGACCAC  
AUUUUGAAUCCAAACCAUAU  
>hsa-mir-1266 MI0006403  
ACAGGUAGUGUCCUCAGGGCUGUAGAACAGGGCUGGGAUUACUAAAGCCCUGUUCUAUGCCCUG  
AGGGACACUGAGCAUGUCA  
>hsa-mir-1267 MI0006404  
CUCCCAAUUCUCCUGUUGAAGUGUAAUCCACCUCAGCAUUGGGGAUUACAUAUUAACAUGAG

AUUUGGAUGAGGA  
>hsa-mir-1268a MI0006405  
UAGCCGGGCGUGGUGGGGGCCUGUGGUCCCAGCUACUUGGAGGCUGAG  
>hsa-mir-1268b MI0016748  
ACCCGGGCGUGGUGGGGGUGGGUGCCUGUAAUUCAGCUAGUUGGGA  
>hsa-mir-1269a MI0006406  
UGGAUUGCCUAGACCAGGGAAGCCAGUUGGCAUGGCUCAGUCCAAGUCUGACCACCUGAGGAAUG  
CCUGGACUGAGCCGUGCUACUGGCUCCCUGGUCUCCAGC  
>hsa-mir-1269b MI0016888  
UGAGGUUUCUGGACUGAGCCAUGCACUGGCUUCUCUGGUUCUCCAGCUUACAGAUGGCUUAUCA  
UGGGACCUCU  
>hsa-mir-1270-1 MI0006407  
CACAGAGUUUACUGGAGAUUUGGAAGAGCUGUGUUGGGUAUAAGUAACAGGCUUUUCUUUAUCU  
UCUAUGUGGCUCUUUGCA  
>hsa-mir-1271 MI0003814  
CACCCAGAUCAUGUCUUGGCACCUAGCAAGCACUCAGUAAAUAUUUGUUGAGUGCCUGCUAUGUG  
CCAGGCAUUGUGCUGAGGGCU  
>hsa-mir-1272 MI0006408  
CCAGAUCAUUCUGGGUGCGAUGAUGAUGGCAGCAAUUCUGAAAACGUGCUCAGUGUCUUUAUA  
ACAGGAAAGCCGUAACUUAGAAAUGUAGGCUCGAGCUCGUGUGCUCUGUGGUCUGGGCUGGUA  
>hsa-mir-1273a MI0006409  
UGAGGCAGGAGAAUUGCUUGAACCCGGGUGGUGGAGGUUGCAGUGAGCCAAGAUUGCGCCACUGC  
ACUCCAGCCUGGGCGACAAAGCAAGACUCUUUCUUGGA  
>hsa-mir-1273c MI0014171  
UGCAGCCUGGGCGACAAAACGAGACCCUGUCUUUUUUUUUUUCUGAGACAGAGUCUCGUUCUGUU  
GCCCAAGCUGGA  
>hsa-mir-1273f MI0018002  
AGGUGGGAGGAUUGCUUGAGCCUGGGAGAUGGAGGUUGCAGUGAGCUGAGAUACGCAACUGCAC  
CCCCAGCCUGGGCCAUAAGAGUCAGUCCUUGUCUC  
>hsa-mir-1273g MI0018003  
GAGGUGGGAGGAUUGCUUGAGUCAGGGUGGUUGAGGCUCGAGUAAGUUGUGAUCAUACCACUGCA  
CUCCAGCCUGAGUGACAGAGCAAGACCUUGUCUCA  
>hsa-mir-1273h MI0025512  
UACUUGGGUGACUAAGGCAGGAUUGCUUGAGCCUGGGAGGUCAAGGCUGCAGUGUCGUGGUCACA  
GCUUGCUGCAGACUCGACCUCCAGGCUUAAGCAAUCCUCCUGCUCGAGUG  
>hsa-mir-1275 MI0006415  
CCUCUGUGAGAAAGGGUGUGGGGAGAGGCUGUCUUGUGUCUGUAAGUAUGCCAAACUUAUUUUC  
CCCAAGGCAGAGGGA  
>hsa-mir-1276 MI0006416  
CCCCAGCUAGGUAAAGAGCCCUGUGGAGACACCUGGAUUCAGAGAACAUGUCUCCACUGAGCACU  
UGGGCCUUGAUGGCGGCU  
>hsa-mir-1277 MI0006419  
ACCUCCAAAUUAUAUAUAUAUAUGUACGUAUGUGUAUAUAAAUGUAUACGUAGAUUAUAUGUAU  
UUUUGGUGGGUUU

---

>hsa-mir-1278 MI0006425  
AUUUGCUCUAUGAUGAUUGCAUAGUACUCCAGAACUCAUUAAGUUGGUAGUACUGUGCAUAUC  
AUCUAUGAGCGAAUAG

>hsa-mir-1279 MI0006426  
AUAUUCACAAAAUUCAUAUUGCUUCUUUCUAAUGCCAAGAAAGAAGAGUAUAAGAACUUC

>hsa-mir-1282 MI0006429  
CCUUCUUCUCGUUUUGCCUUUUUCUGCUUCUGCUGCAUGAUCUCCGAGUCCUGGGGGUAGAGAUG  
AUGGGGCACUGGGAGGUACCAGAGGGCAAAAAGGAC

>hsa-mir-1284 MI0006431  
AUUUUGAUUAUAAGCCAGUUUAAUGUUUUUCUAUACAGACCCUGGCUUUUUUAAAUUUUUAUAUA  
UUGGAAAGCCCAUGUUUGUAUUGGAAACUGCUGGUUUUCUUAUACUGAAAAUCU

>hsa-mir-1285-1 MI0006346  
UGUAGAGAUAGGAUCUCACUUUGUUGCCAGGCUGGUCUCAAACUCCUGGUCUGGGCAACAAAGU  
GAGACCUUAUCUCUACAAG

>hsa-mir-1285-2 MI0006347  
UUUGGGAGGCCGAGGCUGGUGCAUCACUUGAGCCCAGCAAUUUGAGACCAAUCUGGGCAACAAAG  
UGAGACCUCCGUCUCUACAAAGA

>hsa-mir-1286 MI0006348  
UGUCCUCUGGGGACUCAGCUUGCUCUGGCUGCUGGAUUGAAUJAGCUGCAGGACCAAGAUGAGCC  
CUUGGUGGAGACA

>hsa-mir-1287 MI0006349  
GUUGUGCUGUCCAGGUGCUGGAUCAGUGGUUCGAGUCUGAGCCUUUAAAAGCCACUCUAGCCACA  
GAUGCAGUGAUJGGAGCCAUGACAA

>hsa-mir-1288 MI0006432  
GAGGGUGUUGAUCAGCAGAUACAGGACUGUAACUCACCAUAGUGGUGGACUGCCCUGAUCUGGAGA  
CCACUGCCUU

>hsa-mir-1289-1 MI0006350  
UUCUCAAUUUUAGUAGGAAUUAAAAACAAAACUGGUAAAUGCAGACUCUUGGUUUCCACCCCCA  
GAGAAUCCUAAACCGGGGUGGAGUCCAGGAAUCUGCAUUUJAGAAAGUACCCAGGGUGAUUCU  
GAUAAUUGGGAACA

>hsa-mir-1289-2 MI0006351  
CCACGGUCCUAGUUAAAAGGCACAUUCCUAGACCCUGCCUCAGAACUACUGAACAGAGUCACUG  
GGUGUGGAGUCCAGGAAUCUGCAUUUUUACCCCUAUCGCCCCCGCC

>hsa-mir-1290 MI0006352  
GAGCGUCACGUUGACACUCAAAAAGUUUCAGAUUUUGGAACAUUUCGGAUUUUUGGAUUUUUGGAU  
CAGGGAUUCUCAA

>hsa-mir-1291 MI0006353  
GGUAGAAUUCAGUGGCCUGACUGAAGACCAGCAGUUGUACUGUGGCUGUUGGUUUAAGCAGA  
GGCCUAAAGGACUGUCUUCUG

>hsa-mir-1292 MI0006433  
CCUGGGAACGGGUUCCGGCAGACGCUGAGGUUGCGUUGACGCUCGCGCCCCGGCUCCCGUUCAG  
G

>hsa-mir-1293 MI0006355  
AGGUUGUUCUGGGUGGUCUGGAGAUUUGUGCAGCUUGUACCUGCACAAAUCUCCGGACCACUUAG

UCUUUA

>hsa-mir-1294 MI0006356

CACCUAAUGUGUGCCAAGAUCUGUUCAUUUUAUGAUCUCACCGAGUCCUGUGAGGUUGGCAUUGUU  
GUCUGGCAUUGUCUGAUUAUACAACAGUGCCAACCUCACAGGACUCAGUGAGGUGAAACUGAGGAU  
UAGGAAGGUGUA

>hsa-mir-1295a MI0006357

AGGACAUUUUGCCCAGAUCGGUGGCCUAUUCAGAAAUGUGGCCUGUGAUUAGGCCGCAGAUCUGG  
GUGAAAUGUCCUCC

>hsa-mir-1295b MI0019146

CACCCAGAUCUGCGGCCUAAUCACAGGCCACAUUUCUGAAUAGGCCACGGAUCUGGGCAA

>hsa-mir-1296 MI0003780

ACCUACCUAACUGGGUUAGGGCCUGGCUCCAUCUCCUUUAGGAAAACCUUCUGUGGGGAGUGGG  
GCUUCGACCCUAACCCAGGUGGGCUGU

>hsa-mir-1297 MI0006358

UGUUUAUCUCUAGGGUUGAUCUAUUAGAAUUACUUAUCUGAGCCAAAGUAAUUCAGUAAUUCAG  
GUGUAGUGAAAC

>hsa-mir-1298 MI0003938

AGACGAGGAGUUAAGAGUUCAUUCGGCUGUCCAGAUGUAUCCAAGUACCCUGUGUUUUUGGCAA  
UAAAUAUCUUGGGCAACUGACUGAACUUUUCACUUUUCAUGACUCA

>hsa-mir-1299 MI0006359

CCUCAUGGCAGUGUUCUGGAAUCCUACGUGAGGGACAAUCAUUCAGACCCACGUAGCAGUGUUCU  
GGAAUUCUGUGUGAGGGA

>hsa-mir-1301 MI0003815

GGAUUGUGGGGGGUCGCUCUAGGCACCGCAGCACUGUGCUGGGGAUGUUGCAGCUGCCUGGGAGU  
GACUUCACACAGUCCUC

>hsa-mir-1302-1 MI0006362

CAGAAAGCCAGUUAAAUUUGAAUUUCAAGUAAACAAUGAAUAAUUGUGUAUGUAAGAAUAUCCC  
AUACAUAUUUGGGACAUACUUAUGC UAAAAAUUAUUCUUGC UUAUCUGAAAUUCAAAUGUAAC  
UAGGAUUCUGUA

>hsa-mir-1302-10 MI0015979

GGAUGCCAGCUAGUUUGAAUUUJAGAUAAACAACGAAUAAUUCGUAGCAUAAAUAUGUCCCAA  
GCUUAGUUUGGGACAUACUUAUGC UAAAAACAUAUUGGUUGUUUAUCUGAGAUUCAGAAUUA  
GCAUUUUA

>hsa-mir-1302-4 MI0006365

AAUGCAGAAGCACAGCUAAAAUUUGAAUUUCAGAUAAAACAAUUUUUUCUAGAAUAAGUAUGUCU  
CCAUGCAACAUUUGGGACAUACUUAUGC UAAAAUAUUAUUGUGUUUCAUCUGAAAUUCAAAUUC  
AACUGGACAUCCUGUAUUUU

>hsa-mir-1302-5 MI0006366

UGCCCGGCCUCCCAUUAAAUUGGUUUUUCAGACAAAUCACAAAUUUGUUUAGGUUAUAGUAUAUC  
CCAUGUAUUCUUUGGGACAUACUUAUGC UAAAAUAUUAUUGGUUCCUUGUUGAUUGGAAAUUUUAAU  
UUAAUJAGGUGUCCUGUAUU

>hsa-mir-1302-6 MI0006367

AACAAAUAUJUGGUAUAUAUGUAUGGCCACACAAUAUJAGGACAACAAUAUJUGGGACAU  
CUUAUGC UAAAAAGUAUUUGUUGA



---

>hsa-mir-1302-8 MI0006369  
CCCAUUUAAAACUUGAAUUUCAUAUAAAACACCGUAAUUUUCAGCAUUAGUGUAUCACAUGCAGUUAU  
UUGGGACAUACUUAUGCUAAAAUUAGGUGGUGUUGAUCUGAAAUUCAGUGUAGAUGGGCA  
>hsa-mir-1303 MI0006370  
GGCUGGGCAACAUAGCGAGACCUC AACUCUACAAUUUUUUUUUUUUAAAUUUUAGAGACGGGGU  
CUUGCUCUGUUGCCAGGCUUU  
>hsa-mir-1304 MI0006371  
AAACACUUGAGCCCAGCGUUUGAGGCUACAGUGAGAUGUGAUCCUGCCACAUCUCACUGUAGCC  
UCGAACCCCUGGGCUCAAGUGAUUCA  
>hsa-mir-1305 MI0006372  
AAGAUCUGCUGUUUCUACCAUJAGUUUUGAAUGUUUAUUGUAAAGAUACUUUCAACUCUAAUG  
GGAGAGACAGCAGGAUUCUCC  
>hsa-mir-1306 MI0006443  
GUGAGCAGUCUCCACCACCUCCUGCAAACGUCCAGUGGUGCAGAGGUA AUGGACGUJGGCUCU  
GGUGGUGAUGGACAGUCCGA  
>hsa-mir-1307 MI0006444  
CAUCAAGACCCAGCUGAGUCACUGUCACUGCCUACCAAUCUCGACCGGACCUCGACCGGCUCGUC  
UGUGUUGCCAAUCGACUCGGCGUGGCGUCGGUCGUGGUAGAUAGGCGGUCAUGCAUACGAAUUUU  
CAGCUCUUGUUCUGGUGAC  
>hsa-mir-1321 MI0006652  
ACAUAUGAAGCAAGUAUUAUUAUCCUGUUUACAAAUAAGGAAUA AACUCAGGGAGGUGAAU  
GUGAUCAAAGAUAG  
>hsa-mir-1322 MI0006653  
AGUAUCAUGAAUUGAAACCUACUUAUUAUCAUAGUUUACAUAAGAAGCGUGAUGAUGCUGCUGAU  
GCUGUA  
>hsa-mir-1323 MI0003786  
ACUGAGGUCCUCAAACUGAGGGGCAUUUUCUGUGUUUGAAAGGAAAGUGCACCCAGUUUUGGG  
GAUGUCA  
>hsa-mir-1324 MI0006657  
CCUGAAGAGGUGCAUGAAGCCUGGUCUCCUCACUGGGAACCCCUUCCUCUGGGUACCAGA  
CAGAAUUCUAUGCACUUUCCUGGAGGCUCA  
>hsa-mir-1343 MI0017320  
GCUGGCGUCGGUGCUGGGGAGCGGCCCCCGGGUGGGCCUCUGCUCUGGCCCCUCCUGGGGCCCGC  
ACUCUCGCUCUGGGCCCCG  
>hsa-mir-1468 MI0003782  
GGUGGGUGGUUCUCCGUUUGCCUGUUUCGCUGAUGUGCAUUAACUCAUUCUCAGCAAAUAAG  
CAAAUGGAAAUUCGUCCAUC  
>hsa-mir-1470 MI0007075  
GCCCUCCGCCGUGCACCCCGGGCAGGAGACCCCGGGACGCGCCGAGGUAGGGGGGAC  
>hsa-mir-1471 MI0007076  
GCCCGUGUGGAGCCAGGUGUAGAGGCGGAGCACAGCUGGCUCUAAUUUGAGGGGC  
>hsa-mir-1537 MI0007258  
ACAGCUGAAUJAGUCAGUUUCUGUCCUGUCCACACAGAAAACCGUCUAGUUACAGUUGU  
>hsa-mir-1538 MI0007259

---

GGGAACAGCAGCAACAUGGGCCUCGCUUCCUGCCGGCGCGGCCCGGGCUGCUGCUGUUCU  
>hsa-mir-1539 MI0007260  
GGCUCUGCGGCCUGCAGGUAGCGCGAAAGUCCUGCGCGUCCCAGAUGCCC  
>hsa-mir-1587 MI0016905  
UUUGGGCUGGGCUGGGUUGGGCAGUUCUUCUGCUGGACUCACCUGUGACCAGC  
>hsa-mir-1825 MI0008193  
AGAGACUGGGGUGCUGGGCUCUUUAGACUAGGACUCCAGUGCCCUCCUCUC  
>hsa-mir-1827 MI0008195  
UCAGCAGCACAGCCUUCAGCCUAAAGCAAUGAGAAGCCUCUGAAAGGCUGAGGCAGUAGAUUGAA  
U  
>hsa-mir-1908 MI0008329  
CGGGAAUGCCGCGGGCGGGACGGCGAUUGGUCCGUAUGUGUGGUGCCACCGGCCCGCCGGCUCGCG  
CCCGGCCCCCGCCCC  
>hsa-mir-1909 MI0008330  
CAUCCAGGACAAUGGUGAGUGCCGGUGCCUGCCUGGGGCCGUCUCCUGCGCAGGGGCCGGGUGCU  
CACCGCAUCUGCCCC  
>hsa-mir-1910 MI0008331  
UGUCCCUUCAGCCAGUCCUGUGCCUGCCGCCUUUGUGCUGUCCUUGGAGGGAGGCAGAAGCAGGA  
UGACAAUGAGGGCAA  
>hsa-mir-1911 MI0008332  
UCGGCAUCUGCUGAGUACCGCAUGUCUGUUGGGCAUCCACAGUCUCCCACCAGGCAUUGUGGUC  
UCCGCUGACGCUUUG  
>hsa-mir-1912 MI0008333  
CUCUAGGAUGUGCUCAUUGCAUGGGCUGUGUAUAGUAUUAUCAAUACCCAGAGCAUGCAGUGUG  
AACAUAAUAGAGAUU  
>hsa-mir-1913 MI0008334  
ACCUCUACCUCGCGCAGAGGAGGCUGCAGAGGCUGGCUUCCAAAACUCUGCCCCCUCGCGUCG  
UGCCAAGUGGCUGGU  
>hsa-mir-1914 MI0008335  
CGUGUGAGCCCGCCUGUGCCCCGGGCCACUUCUGCUUCCUCUAGCGCAGGAGGGGUCGCGCACU  
GGGAGGGGCCUCAC  
>hsa-mir-1915 MI0008336  
UGAGAGGCCGACCUUGCCUUGCUGCCCGGGCCGUGCACCCGUGGGCCCCAGGGCGACGCGGCGG  
GGGCGGCCUAGCGA  
>hsa-mir-1972-1 MI0009982  
UAUAGGCAUGUGCCACCACACCUGGCUAAAUGUGUCAUUAUAAAAUUCAGGCCAGGCACAGUGG  
CUCAUGCCUGUA  
>hsa-mir-1973 MI0009983  
UAUGUCAAACGGCCAUGGUAUCCUGACCGUGCAAAGGUAGCAUA  
>hsa-mir-1976 MI0009986  
GCAGCAAGGAAGGCAGGGUCCUAAGGUGUGUCCUCCUGCCUCCUUGCUGU  
>hsa-mir-2052 MI0010486  
CUGUUUUGAUAAACAGUAAUGUCCCUUAGUUCAAAGUUACCAGCUAUCAAAACAA  
>hsa-mir-2053 MI0010487

---

CUUGCCAUGUAAAUACAGAUUUAAUUAACAUUUGCAACCCUGUGAAGAUGCAAAACUUUAAGUGUU  
AAUUAACCUCUAUUUACAUAGCAAG  
>hsa-mir-2054 MI0010488  
CUGUAAUAUAAAUUUAAUUUAUUCUCUAUCAUUAAAAAUGUAUUACAG  
>hsa-mir-2110 MI0010629  
CAGGGGUUUGGGGAAACGGCCGUCGAGUGAGGCGUCGGCUGUGUUUCACACCGGGUCUUUUCCU  
CCCACUCUUG  
>hsa-mir-2113 MI0003939  
UUUCAAAGCAAUGUGUGACAGGUACAGGGACAAAUCCCGUAAUAAGUAAGAGGAUUUGUGCUU  
GGCUCUGUCACAUGCCACUUUGAAAA  
>hsa-mir-2114 MI0010633  
CCUCCAUGCUCUAGUCCCUUCCUUGAAGCGGUCGGAUAAUCACAUGACGAGCCUCAAGCAAGGG  
ACUUCAAGCUGGUGG  
>hsa-mir-2115 MI0010634  
ACUGUCAUCCACUGCUUCCAGCUUCCAUGACUCCUGAUGGAGGAAUCACAUGAAUUCAUCAAGAA  
UUCAUGGAGGCUAGAAGCAGUAUGAGGAUCAUUUA  
>hsa-mir-2116 MI0010635  
GACCUAGGCUAGGGUUCUAGCAUAGGAGGUCUCCCAUGCUAAGAAGUCCUCCCAUGCCAAGA  
ACUCCAGACUAGGA  
>hsa-mir-2117 MI0010636  
GCUCUGAUUUACUUCUGUCCGGCAUGGUGAACAGCAGGAUUGGCUGUAGCUGUUCUCUUUGCCAA  
GGACAGAUCUGAUCU  
>hsa-mir-2276 MI0011282  
GUGUUCUUCAGUCCGCCUCUGUCACCUUGCAGACGGCUUUCUCUCCGAAUGUCUGCAAGUGUC  
AGAGGCGAGGAGUGGCAGCUGCAU  
>hsa-mir-2277 MI0011284  
GUGCUUCCUGCGGGCUGAGCGCGGGCUGAGCGCUGCCAGUCAGCGCUCACAUUAAGGCUGACAGC  
GCCUUGCCUGGCUCGGCCGGCGAAGCUC  
>hsa-mir-2278 MI0011285  
GUGCUCAGGUGUUGGAGAGCAGUGUGUGUUGCCUGGGGACUGUGUGGACUGGUAUCACCCAGAC  
AGCUUGCACUGACUCCAGACCCUGCCGUCAU  
>hsa-mir-2355 MI0015873  
CAGACGUGUCAUCCCAGAUACAAUGGACAAUAUGCUAUUAUAAUCGUAUGGCAUUGUCCUUGCU  
GUUUGGAGAUAAUACUGCUGAC  
>hsa-mir-2392 MI0016870  
AUGGUCCUCCCAAUCCAGCCAUUCCUCAGACCAGGUGGCUCCCGAGCCACCCCAGGCUGUAGGA  
UGGGGUGAGAGGUGCUAG  
>hsa-mir-2467 MI0017432  
GGACAGGCACCGAGGCUCUGUUAGCCUUGGCUCUGGGUCCUGCUCCUAGAGCAGAGGCAGAGA  
GGCUCAGGGUCUGUCU  
>hsa-mir-2681 MI0012062  
GCCCCUUUUCACGCAUUUGUGUUUACCACCUCCAGGAGACUGCCCAAAGACUCUUCAGUAUCA  
UGGAGUUGGUAAGCACAGAUGCAUGAAUAAUUCACCGUG  
>hsa-mir-2682 MI0012063

---

ACCUUCCUGAAAGAGGUUGGGGCAGGCAGUGACUGUUCAGACGUCCAAUCUCUUUGGGACGCCUC  
UUCAGCGCUGUCUCCCCUGCCUCUGCCUUUAGGACGAGUCUCAA  
>hsa-mir-2861 MI0013006  
GGCGCCUCUGCAGCUCCGGCUCCCCCUGGCCUCUCGGGAACUACAAGUCCAGGGGGCCUGGCGG  
UGGGCGGCGGGCGGAAGAGGCGGGG  
>hsa-mir-2909 MI0013083  
GGUGUUAGGGCCAACAUCUCUUGGUCUUUCCCCUGUGGUCCCAAGAUGGCUGUUGCAACUUAACG  
CCAU  
>hsa-mir-3064 MI0017375  
GGUCUGGCUGUUGUGGUGUGCAAACUCCGUACAUUGCUAUUUUGCCACACUGCAACACCCUUACA  
G  
>hsa-mir-3065 MI0014228  
CUGCCCUUUCACAAAUCACUGAUGCUGGAGUCGCCUGAGUCAUCACUCAGCACCAGGAUUAU  
GUUGGAGAGGACAG  
>hsa-mir-3074 MI0014181  
GCUCGACUCCUGUUCUGCUGAACUGAGCCAGUGUGUAAAAUGAGAACUGAUUAUCAGCUCAGUAG  
GCACCGGAGGGCGGGU  
>hsa-mir-3115 MI0014127  
UCUGAAUAUGGGUUUACUAGUUGGUGGUGAAUUCAUGAGUCGCCAACUAUUAGGCCUUUAUGUCC  
AGA  
>hsa-mir-3116-1 MI0014128  
CUUUUAUUGAGUCCCUACUAUGUCCAGGCACUGGGUAUCGUAGGUGCCUGGAACAUAGUAGGGAC  
UCAAUAAAG  
>hsa-mir-3117 MI0014130  
CCCUAAGGGCCAGACACUAUACGAGUCAUAUAAGGGAAGGCAUUAUAGGACUCAUAUAGUGCCA  
GGUGUUUUGUGGG  
>hsa-mir-3118-5 MI0014243  
CACACAUACAAUAAUUAUUAUAAUGCAAUCACACACAAUCACCAUGUGACUGCAUUAUGAAAAU  
CUUCUAGUGUG  
>hsa-mir-3119-1 MI0014134  
AUUAACUCUGGCUUUUAACUUUGAUGGCAAAGGGGUAGCUAAACAAUCUAUGUCUUUGCCAUCAA  
AGUUAAAAGCCAUGUUAAU  
>hsa-mir-3120 MI0014136  
GUCAUGUGACUGCCUGUCUGUGCCUGCUGUACAGGUGAGCGGAUGUUCUGCACAGCAAGUGUAGA  
CAGGCAGACACAUGAC  
>hsa-mir-3121 MI0014137  
AAAUGGUUAUGUCCUUUGCCUAUUCUAUUUAAGACACCCUGUACCUUAAAUAAGAGUAGGCAAAGG  
ACAGAAACAUUU  
>hsa-mir-3122 MI0014138  
ACCAGCUCUGUUGGGACAAGAGGACGGUCUUCUUUUGGAAGGAAGACCAUCAUCUUGUCCGAAGA  
GAGCUGGU  
>hsa-mir-3123 MI0014139  
AUGGAUUUGAUUGAAUGAUUCUCCAUUCCACAUGGAGAGUGGAGCCCAGAGAAUUGUUUAAUC  
AUGUAUCCA

---

>hsa-mir-3124 MI0014140  
GCGGGCUUCGCGGGCGAAGGCAAAGUCGAUUUCCAAAAGUGACUUUCCUCACUCCCGUGAAGUCG  
GC

>hsa-mir-3125 MI0014142  
GAGAAUGGGUAGAGGAAGCUGUGGAGAGAACUCACGGUGCCUGUGGUUCGAGAUCCCCGCCUUC  
UCCUCCUUUCCUC

>hsa-mir-3126 MI0014143  
AUGAUUAUAUGAGGGACAGAUGCCAGAAGCACUGGUUAUGAUUUGCAUCUGGCAUCCGUCACACA  
GAUAAUUAU

>hsa-mir-3127 MI0014144  
GGCCAGGCCAU CAGGGCUUGUGGAAUGGGAAGGAGAAGGGACGCUUCCCCUUCUGCAGGCCUGC  
UGGGUGUGGCU

>hsa-mir-3128 MI0014145  
UUCCUCUGGCAAGUAAAAACUCUCAUUUCCUUAAAAAAUGAGAGUUUUUACUUGCAAUAGGA  
A

>hsa-mir-3129 MI0014146  
GUACUUGGGCAGUAGUGUAGAGAUUGGUUUGCCUGUUAUGAAUUCAAACUAAUCUCUACACUGC  
UGCCCAAGAGC

>hsa-mir-3130-1 MI0014147  
CUUGUCAUGUCUUACCCAGUCUCCGGUGCAGCCUGUUGUCAAGGCUGCACCGGAGACUGGGUAAG  
ACAUGACAAG

>hsa-mir-3131 MI0014151  
GAGUCGAGGACUGGUGGAAGGGCCUUUCCCCUCAGACCAAGGCCUGGCCCCAGCUUCUUCUC

>hsa-mir-3132 MI0014152  
GGUGGGAUGGGUAGAGAAGGAGCUCAGAGGACGGUGCGCCUUGUUUCCCUUGAGCCCUCCUCUC  
UCAUCCACC

>hsa-mir-3133 MI0014153  
CAGAAAUUGUAAAGAACUCUUAAAACCCAAUAGUAAAAAGACAACCUGUUGAGUUUUAAGAGUUC  
UUUAUAUAUUCUG

>hsa-mir-3134 MI0014155  
UGUAUCCAAUGUGUAGUCUUUAUCCUCACAUGGAGUAAAAUAUGAUGGAUAAAAGACUACAUA  
UUGGGUACA

>hsa-mir-3135a MI0014156  
UCACUUUGGUGCCUAGGCUGAGACUGCAGUGGUGCAAUCUCAGUUCACUGCAGCCUUGACCUCU  
GGGUCAGGUGA

>hsa-mir-3135b MI0016809  
UGCCCAGGCUGGAGCGAGUGCAGUGGUGCAGUCAGUCCUAGCUCACUGCAGCCUCGAACUCCUGG  
GCU

>hsa-mir-3136 MI0014158  
AAUAUGAAACUGACUGAAUAGGUAGGGUCAUUUUUCUGUGACUGCACAUGGCCCAACCUAUUCAG  
UUAGUCCAUAAU

>hsa-mir-3137 MI0014160  
UACAGGUCUGUAGCCUGGGAGCAAUGGGGUGUAUGGUUAUAGGGGUAGCCUCGUGCUCUCCUGGGCUA  
CAAACUGUA

---

>hsa-mir-3138 MI0014161  
CCCUCUCGGCACUCCCCCACCUCACUGCCCGGGUGCCCACAAGACUGUGGACAGUGAGGUAGA  
GGGAGUGCCGAGGAGGG

>hsa-mir-3139 MI0014162  
GGCUCAGAGUAGGAGCUAACAGAUGCCUGUUGACUGAAUAAUAAACAGGUUAUCGCAGGAGCUUU  
UGUUAUGUGCC

>hsa-mir-3140 MI0014163  
CCUCUUGAGGUACCUGAAUUACAAAAGCUUUUAUGUAUUCUGAAGUUAUUGAAAAUAAGAGCUUU  
UGGGAAUUCAGGUAGUUCAGGAGUG

>hsa-mir-3141 MI0014165  
UCACCCGGUGAGGGCGGGUGGAGGAGGGGUCCCCACCAUCAGCCUUCACUGGGACGGGA

>hsa-mir-3142 MI0014166  
UUCAGAAAGGCCUUUCUGAACCUUCAGAAAGGCUGCUGAAUCUUCAGAAAGGCCUUUCUGAACCU  
UCAGAAAGGCUGCUGAA

>hsa-mir-3143 MI0014167  
UAGAUACAUGUAAAGCGCUUCUUCGCGGUUGGGCUGGAGCAACUCUUUACAAUGUUCUA

>hsa-mir-3144 MI0014169  
AACUACACUUUAAGGGGACCAAAGAGAUUAUAGAUUAUCAGCUACCUAUUAUACCUUUCGGUCUC  
UUUAAAGUGUAGUU

>hsa-mir-3145 MI0014170  
UAUAUGAGUUAACUCCAAACACUCAAACUCAUUGUUGAAUGGAAUGAGAUUUUUGAGUGUUU  
GGAAUUGAACUCGUUAUA

>hsa-mir-3146 MI0014172  
GCUAAGUCCCUUCUUUCUAUCCUAGUAUAACUUGAAGAAUUCAAAUAGUCAUGCUAGGAUAGAAA  
GAAUGGGACUUGGC

>hsa-mir-3147 MI0014173  
GUCCGGGUUGGGCAGUGAGGAGGGUGUGACGCCGGAAGUGCACCUCGCCCUUGUCCAACUCGGA  
C

>hsa-mir-3148 MI0014175  
GAGUUAAGAUGGAAAAACUGGUGUGUGCUUAUUGAUGUAGCCAACAAGCAUACAUCAGUUUUUU  
CCAACUUAACUC

>hsa-mir-3149 MI0014176  
AUACAUAUGUACACACACAUUGUCAUCCACACACAUACAUAUAUAUAUGUUUGUAUGGAUAUGU  
GUGUGUAUGUGUGUGUAU

>hsa-mir-3150b MI0016426  
GAGGGAAAGCAGGCCAACCUUCGAGGAUCUCCCCAGCCUUGGCGUUCAGGUGCUGAGGAGAUCGUC  
GAGGUUGGCCUGCUUCCCCUC

>hsa-mir-3151 MI0014178  
GGGGUGAUGGGUGGGGCAAUGGGAUCAGGUGCCUCAAGGGCAUCCACCUGAUCCACAGCCCA  
CCUGUCACCCC

>hsa-mir-3152 MI0014179  
GUGCAGAGUUUAUUGCCUCUGUUCUAACACAAGACUAGGCUUCCUGUGUUAGAAUAGGGGCAAUA  
ACUCUGCAC

>hsa-mir-3153 MI0014180

---

GACAAAUUUUAAAUGUCCUGUCCCCUCCCCCAAUUAAAAGUAGAUUGGGGGAAAGCGAGUAGG  
GACAUUUAAAAUUUGUU  
>hsa-mir-3154 MI0014182  
GGCCCCUCCUUCUCAGCCCCAGCUCCCGCUCACCCUGCCACGUCAAAGGAGGCAGAAGGGGAGU  
UGGGAGCAGAGAGGGGACC  
>hsa-mir-3155a MI0014183  
UCCGGGCAUACCUCACUCAGAGCCUGGGGAGCCGGACAGCUCCCUUCCAGGCUCUGCAGU  
GGGAACUGAUGCCUGGA  
>hsa-mir-3156-2 MI0014230  
UGCAGAAGAAAGAUUGGAAGUGGGAGACACUUUCACUAUAUAUAGUGGCUCCACUCCAGAUC  
UUUCUCUCUGUA  
>hsa-mir-3157 MI0014185  
GGGAAGGGCUUCAGCCAGGCUAGUGCAGUCUGCUUUGUGCCAACACUGGGGUGAUGACUGCCUA  
GUCUAGCUGAAGCUUUUCCC  
>hsa-mir-3158-1 MI0014186  
AUUCAGGCCGGUCCUGCAGAGAGGAAGCCUUCUGCUUACAGGUAUUGGAAGGGCUCCUCUCUG  
CAGGACCGGCCUGAAU  
>hsa-mir-3159 MI0014188  
CCAAAGUCCUAGGAUUACAAGUGUCGGCCACGGGCUGGGCACAGUGGCUCACGCCUGUAAUCCCA  
GCAUUUUGG  
>hsa-mir-3160-1 MI0014189  
GGACCUGCCCUGGGCUUUCUAGUCUCAGCUCUCCUCCAGCUCAGCUGGUCAGGAGAGCUGAGACU  
AGAAAAGCCCAGGGCAGGUUC  
>hsa-mir-3161 MI0014191  
CCUCGAGAGCUGAUAAAGAACAGAGGCCAGAUUGAAGUUGAAUAGUGCUGGGCCUUUGUUUUUAC  
CAAGUCCCUGG  
>hsa-mir-3162 MI0014192  
CUGACUUUUUAGGGAGUAGAAGGGUGGGGAGCAUGAACAAGUUUCACUCCCUACCCCUCCA  
CUCCCCAAAAAAGUCAG  
>hsa-mir-3163 MI0014193  
UUCUCUAUCUAUAAAUGAGGGCAGUAAGACCUUCCUCCUUGUCUUACUACCCCAUUUUAUAG  
AUGAGGAA  
>hsa-mir-3164 MI0014194  
CUUGGAAACUGUGACUUUAAGGGAAAUGGCGCACAGCAGACCCUGCAAUCAUGCCGUUUUGCUUG  
AAGUCGCAGUUUCCAGG  
>hsa-mir-3165 MI0014195  
CCGGUGGCAAGGUGGAUGCAAUGUGACCUCAACUCUUGGUCCUCUGAGGUCACAUUGUAUCCACC  
UUACCACUGG  
>hsa-mir-3166 MI0014196  
AAAUUUUUUUGAGGCCAGUAGGCAUUGUCUGCGUUAGGAUUUCUGUAUCAUCCUCCUAACGCAGA  
CAAUGCCUACUGGCCUAAGAAAAAUUU  
>hsa-mir-3167 MI0014198  
GGCUGUGGAGGCACCAGUAUUUCUGAAAUUCUUUUUUCUGAAAUUCUUCAGGAAGGAUUUCAGAA  
AUACUGGUGUCCCGACAGCC

---

>hsa-mir-3168 MI0014199  
AAGAUCAUGAGUUCUACAGUCAGACAGCCUGAGUUGGAGGCUCAUCUUCACUUCUUGCUGUGUGA  
CCCUGGGCCAGUGACUU

>hsa-mir-3169 MI0014200  
AUGUGAAAACAUAGGACUGUGCUUGGCACAUAGCACAAAGUCUUAUGGUACUGUGUGCCAAGCAU  
AGUCCUGUGUUUUUACAU

>hsa-mir-3170 MI0014201  
CUGGUAACACUGGGGUUCUGAGACAGACAGUGUUAGCUC CAGAAGCAUUGCCUGUCUAGAACCC  
CUAUGUUACCAG

>hsa-mir-3171 MI0014202  
UAUAUAUAGAGAUGUAUGGAAUCUGUAUAUAUCUAUAUAUAUGUGUAUAUAUAGAUUCCAUAUU  
CUAUAUAUG

>hsa-mir-3173 MI0014204  
UCCUGCCCUGCCUGUUUUCUCUUCUUGUGAUUUUAUGAGAACAAGGAGGAAUAGGCAGGCCAG  
GGA

>hsa-mir-3174 MI0014208  
GUUACCUGGUAGUGAGUUAGAGAUGCAGAGCCCUGGGCUC CAGCAAACCUACUGGAUCUGCAU  
UUUAAUUCACAUGCAUGGUAAU

>hsa-mir-3175 MI0014209  
CCUGGGGGGCGGGGAGAGAACGCAGUGACGUCUGGCCGCGUGCGCAUGUCGGGCGCUUCUCCUC  
CCCCUACCCAGG

>hsa-mir-3176 MI0014210  
UGGCCUCUCCAGUCUGCAGUCUCCCGGCAGCCUCGGGCCACACUCCCGGGAUCCCCAGGGACUGGC  
CUGGGACUACCGGGGUGGCGGCCG

>hsa-mir-3177 MI0014211  
CCACGUGCCAUGUGUACACACGUGCCAGGCGCUGUCUUGAGACAUUCGCGCAGUGCACGGCACUG  
GGGACACGUGGCACUGG

>hsa-mir-3178 MI0014212  
GAGGCUGGGCGGGGCGCGGCCGGAUCGGUCGAGAGCGUCCUGGCUGAUGACGGUCUCCGUGCCC  
ACGCCCAAACGCAGUCUC

>hsa-mir-3179-1 MI0014213  
CAGGAUCACAGACGUUUAAAUAUACACUCCUUCUGCUGUGCCUACAGCAGUAGAAGGGGUGAAU  
UUAAACGUCUGUGAUCCUG

>hsa-mir-3180-1 MI0014214  
CAGUCGACGGGCGGAGCUUCCAGACGCUCGCCCCACGUCGCAUGCGCCCCGGGAAAGCGUGGG  
GCGGAGCUUCCGGAGGCCCGCCUGCUG

>hsa-mir-3180-4 MI0016408  
GCUCCGCCCCACGUCGCAUGCGCCCCGGGAACGCGUGGGGCGGAGCUUCCGGAGGCCCGCUCUG  
CUGCCGACCCUGUGGAGCGGAGGGUGAAGCCUCCGGAUGCCAGUCCCUCAUCGUGGCCUGGUCG  
CGCUGUGGCGAAGGGGGCGGAGC

>hsa-mir-3181 MI0014223  
CGGCGACCAUCGGGCCUCGGCGCCGGCCCGUUAGUUGCCCGGGCCCGAGCCGGCCGGGCCCGCG  
GGUUGCCG

>hsa-mir-3182 MI0014224



---

GCUGCUCUGUAGUGUAGUCCGUGCAUCCGCCCUUCGAUGCUGGGUUGGAUCAUAGAGCAGU  
>hsa-mir-3183 MI0014225  
CUCUGCCUGCCUCUCUCGGAGUCGCUCGGAGCAGUCACGUUGACGGAAUCCUCCGGCGCCUCCU  
CGAGGGAGGAGAGGCAGGG  
>hsa-mir-3184 MI0014226  
AAGCAAGACUGAGGGGCCUCAGACCGAGCUUUUGGAAAUAAGAAAAGUCUCGCUCUCUGCCCCUC  
AGCCUAACUU  
>hsa-mir-3185 MI0014227  
GAAUGGAAGAAGAAGGCGGUCGGUCUGCGGGAGCCAGGCCGCAGAGCCAUCCGCCUUCUGUCCAU  
GUC  
>hsa-mir-3186 MI0014229  
AGCCUGCGGUUCCAACAGGCGUCUGUCUACGUGGCUUCAACCAAGUUCAAAGUCACGCGGAGAGA  
UGGCUUUGGAACCAGGGGCU  
>hsa-mir-3187 MI0014231  
GCUGGCCUGGGCAGCGUGUGGCUGAAGGUCACCAUGUUCUCCUUGGCCAUGGGGCUGCGCGGGG  
CCAGC  
>hsa-mir-3188 MI0014232  
GGCGCCUCCUGCUCUGCUGUGCCGCCAGGGCCUCCCCUAGCGCGCCUUCUGGAGAGGCUUUGUGC  
GGAUACGGGGCUGGAGGCCU  
>hsa-mir-3189 MI0014233  
GCCUCAGUUGCCCCAUCUGUGCCCUGGGUAGGAAUAUCCUGGAUCCCCUUGGGUCUGAUGGGGUA  
GCCGAUGC  
>hsa-mir-3190 MI0014235  
CUGGGGUCACCUGUCUGGCCAGCUACGUCCCCACGGCCCUUGUCAGUGUGGAAGGUAGACGGCCA  
GAGAGGUGACCCCGG  
>hsa-mir-3191 MI0014236  
GGGUCACCUCUCUGGCCGUCUACCUUCCACACUGACAAGGGCCGUGGGGACGUAGCUGGCCAGA  
CAGGUGACCCC  
>hsa-mir-3192 MI0014237  
GGAAGGGAUUCUGGGAGGUUGUAGCAGUGGAAAAGUUCUUUUCUUCUUCUGAUCGCCUCUCAG  
CUCUUUCUUCU  
>hsa-mir-3193 MI0014238  
UCCUGCGUAGGAUCUGAGGAGUGGACGAGUCUCAUUACCCAGCUCUCCUGAGCAGGA  
>hsa-mir-3194 MI0014239  
AGGUGGCAGGGCCAGCCACCAGGAGGGCUGCGUGCCACCCGGGCAGCUCUGCUGCUCACUGGCAG  
UGUCACCU  
>hsa-mir-3195 MI0014240  
CCGCAGCCGCCGCGCCGGGCCCGGGUUGGCCGUGACCCCCGCGGGGCCCGGGCGGCCGGGGCG  
GGGGCGGGGCUGCCCCGG  
>hsa-mir-3196 MI0014241  
GGGUGGGGGCGGGCGGCAGGGCCUCCCCAGUGCCAGGCCCAUUCUGCUUCUCUCCAGCU  
>hsa-mir-3197 MI0014245  
GGCGAGGGGAGGCGCAGGCUCGGAAAGGCGCGGAGGCUCUCCAGGCUCUCCGAUCCACCGCUC  
UCCUCGU

---

>hsa-mir-3198-1 MI0014246  
GACUGUGCUCUCACUGUUCACCCAGCACUAGCAGUACCAGACGGUUCUGUGGAGUCCUGGGGAAU  
GGAGAGAGCACAGUC

>hsa-mir-3199-1 MI0014247  
GGUGACUCCAGGGACUGCCUAGGAGAAAGUUUCUGGAAGUUCUGACAUUCCAGAAACUUUCUCC  
UAAGGCAGUCCUGGGAGUCACU

>hsa-mir-3200 MI0014249  
GGUGGUCGAGGGAAUCUGAGAAGGCGCACAAGGUUUGUGUCCAAUACAGUCCACACCUUGCGCUA  
CUCAGGUCUGCUCGUGCCCU

>hsa-mir-3201 MI0014250  
GGGAUAUGAAGAAAAUAAGAGGCUAGGAUUGCCUCUUAUUUUUACAUGCCC

>hsa-mir-3202-1 MI0014252  
UAUUAAUAUGGAAGGGAGAAGAGCUUUAUGAUUGGAGUCAUUUUCAGAGCAUUAAAAGCUCUUCU  
CCCUUCCAUAUUAUG

>hsa-mir-3529 MI0017351  
GGCACCAUAGGUAGACUGGGAUUUGUUGUUGAGCGCAGUAAGACAACAACAAAUCACUAGUCU  
UCCAGAUGGGGCC

>hsa-mir-3591 MI0017383  
CAGUAGCUAUUUAGUGUGAUAAUGGCGUUUGAUAGUUUAGACACAAACACCAUUGUCACACUCCA  
CAGCUCUG

>hsa-mir-3605 MI0015995  
ACUUUAUACGUGUAAUUGUGAUGAGGAUGGAUAGCAAGGAAGCCGCUCCACCUGACCCUCACGG  
CCUCCGUGUUACCUGUCCUCUAGGUGGGACGCUCG

>hsa-mir-3606 MI0015996  
UUGUUGCUAUCUAGGUUAGUGAAGGCUAUUUUAUUUUUUUAAAAUUUCUUUCACUACUUAGG

>hsa-mir-3607 MI0015997  
AAGGUUGCGGUGCAUGUGAUGAAGCAAUCAGUAUGAAUGAAUUCAUGAUACUGUAAACGCUUUC  
UGAUGUACUACUCA

>hsa-mir-3609 MI0015999  
GUAACAGUAACUUUUUAUUCUCAUUUCCUUUUCUCUACCUUGUAGAGAAGCAAAGUGAUGAGUAA  
UACUGGCUGGAGCCC

>hsa-mir-3610 MI0016000  
AAGAGCCGCGGCGUAACGGCAGCCAUCUUGUUUGUUUGAGUGAAUCGGAAAGGAGGCGCCGGCUG  
UGGCGGCG

>hsa-mir-3611 MI0016001  
AGCAGGUCUAAUAAGAAUUUCUUUUUCUUCACAAUUAUGAAAGAAAAGAAAUUGUGAAGAAAGAA  
AUUCUUACUAGUUUUGCU

>hsa-mir-3612 MI0016002  
GGGACUGGGGAUGAGGAGGCAUCUUGAGAAAUGGAAGGAAUGGGAUCUACUUCAGUUCACUAGA  
GGCGUCCUGACACCCCUAGCUC

>hsa-mir-3613 MI0016003  
UGGUUGGGUUUGGAUUGUUGUACUUUUUUUUUUGUUCGUUGCAUUUUUAGGAACAAAAAAAAAAG  
CCCAACCCUUCACACCACUUCA

>hsa-mir-3614 MI0016004

GGUUCUGUCUUGGGCCACUUGGAUCUGAAGGCUGCCCCUUGCUCUCUGGGGUAGCCUUCAGAUC  
UUGGUGUUUUGAAUUCUACU  
>hsa-mir-3615 MI0016005  
GACUCUGGGACGCUCAGACGCCGCGGGGGCGGGGAUUGGUCUGUGGUCCUCUCUCGGCUCUCG  
CGGCUCGCGGCGGCCGACGGUU  
>hsa-mir-3616 MI0016006  
UGUCACUCCGCCAGCAUCAUGAAGUGCACUCAUGAUAUGUUUGCCCCAUCAGCGUGUCACGAGGG  
CAUUUCAUGAUGCAGGCGGGGUUGGCA  
>hsa-mir-3617 MI0016007  
AGGUCAUAGAAAGACAUAGUUGCAAGAUGGGAUUAGAAACCAUAUGUCUCAUCAGCACCCUAUGU  
CCUUUCUCUGCCCU  
>hsa-mir-3618 MI0016008  
UAAGCUGAGUGCAUUGUGAUUUCCAAUAAUUGAGGCAGUGGUUCUAAAAGCUGUCUACAUUAAUG  
AAAAGAGCAAUGUGGCCAGCUUG  
>hsa-mir-3619 MI0016009  
ACGGCAUCUUUGCACUCAGCAGGCAGGCUGGUGCAGCCCGUGGUGGGGGACCAUCCUGCCUGCUG  
UGGGGUAAGGACGGCUGU  
>hsa-mir-3620 MI0016011  
GUGAGGUGGGGGCCAGCAGGGAGUGGGCUGGGCUGGGCUGGGCCAAGGUACAAGGCCUCACCCUG  
CAUCCCGCACCCAG  
>hsa-mir-3621 MI0016012  
GUGAGCUGCUGGGGACGCGGGUCGGGGUCUGCAGGGCGGUGCGGCAGCCGCCACCUGACGCCGCG  
CCUUUGUCUGUGUCCACAG  
>hsa-mir-3622b MI0016014  
AGUGAUUAAUAGAGGGUGCACAGGCAUGGGAGGUCAGGUGAGCUCAGCUCUCCUGCCUCACCUGA  
GCUCCCGUGCCUGUGCACCCUCUAUUGGCU  
>hsa-mir-3646 MI0016046  
UUCAGUAGGUUGGGUUCAUUUCAUUUUAUGACAACCCUAUAUGGGAAAUGUUGUGAAAAUGAA  
AUGAGCCCAGCCAUUGAA  
>hsa-mir-3648 MI0016048  
CGCGACUCGGCGGGGUGGUGGGGGGAGCCGCGGGGAUCGCCGAGGGCCGGUCGGCCGCCCGG  
GUGCCGCGCGGUGCCCGCGGCGGCGGUGAGGCCCGCGCGUGUGUCCCGGUCGCGGUCGGCCGCG  
CUCGAGGGGUCUCCCGUGGCGUCCCUUCCCGCGGCGGCCUUCUCGCG  
>hsa-mir-3649 MI0016049  
GCUUGGAACAGGCACCUGUGUGUGCCCAAGUGUUUCUAGCAAACACAGGGACCUGAGUGUCUAAAG  
C  
>hsa-mir-3650 MI0016050  
UCAAGGUGUGUCUGUAGAGUCCUGACUGCGUGCCAGGGGUCUCUGUCUGGCACAUUUCUGA  
>hsa-mir-3651 MI0016051  
GAUUCGAUGGGCCAUAGCAAUCCUGUGAUUUUAUGCAUGGAGGCUGCUUCUCCUCAGCAGCUGCCA  
UAGCCCGGUCGUGGUACAUGAUUC  
>hsa-mir-3652 MI0016052  
CGGCUGGAGGUGUGAGGAUCCGAACCCAGGGGUGGGGGGUGGAGGCGGCUCUCCUGCGAUCCAAGGG  
GACUUGAGACUCACCGGCCGACGCAUGAGGGCCCUUGGGGUGCUGGGCCUCUGCUGCGUCCUG

C

>hsa-mir-3653 MI0016053  
UCCCUUGGGGACCCUUGGCAGCCCUCUCCUGAUGAUUCUUCUCCUGAGCACGCUCAUGAUGAGCAA  
ACUGAGCCUCUAAGAAGUUGACUGAAGGGGCUGCUUCCCAAGGA

>hsa-mir-3654 MI0016054  
UUCAUGAGCUGCAAUCUCAUCACUGGAAUGUUCAGCGACUGGACAAGCUGAGGAA

>hsa-mir-3655 MI0016055  
GCUUGUCGCUGCGGUGUUGCUGUUGGAGACUCGAUUGUUGGUGACAGCGAAAGAACGAUAACAAA  
AUGCCGGAGCGAGAUAGU

>hsa-mir-3656 MI0016056  
CUUUCGGCCAGCGGGACGGCAUCCGAGGUGGGCUAGGCUCGGGCCCCGUGGCGGGUGCGGGGGUGG  
GAGG

>hsa-mir-3657 MI0016057  
UGUGUCCCAUAAUAAAUAUGAAAUCUGAAAUCACCAAUAAUGGGACACUAAUGUGAUUAAUGU  
UGUUGUGUCCCAUAAUUGGUGAUUUCAGAUUUAUAUAUGAUUAAGGACAU

>hsa-mir-3658 MI0016058  
UAUUUAAGAAAACACCAUGGAGAUGAAAUGCCUUUGAUUUUUUUUUUCUUUUUGUA

>hsa-mir-3659 MI0016060  
UCUACAAGCAGAUACAAGGAUGCCUUGUACACAACACACGUGCUGCUUGUAUAGACAUGAGUGU  
UGUCUACGAGGGCAUCCUUGUGUCUGUGUGUGUG

>hsa-mir-3660 MI0016061  
GAAAGAAGAACUGGACAAAUAUAAAUGCUCUUCUGUCAUUGUAAUAGUUCAUAUGGGCACUGAC  
AGGAGAGCAUUUUGACUUUGUCAAGUGUGUCUGCU

>hsa-mir-3661 MI0016062  
CACCUUCUCGCAGAGGCUCUUGACCUGGGACUCGGACAGCUGCUUGCACUCGUUCAGCUGCUCGA  
UCCACUGGUCCAGCUCCUUGGUGAACACCUU

>hsa-mir-3662 MI0016063  
UGUGUUUCCUCAACGCUCACAGUUACACUUCUACUCUCAAUCCAUAUAUUGAAAAUGAUGA  
GUAGUGACUGAUGAAGCACAAAUCAGCCAA

>hsa-mir-3663 MI0016064  
CCCGGGACCUUGGUCCAGGCGCUGGUCUGCGUGGUCUCGGGUGGAUAAGUCUGAUCUGAGCACC  
ACACAGGCCGGGCGCCGGGACCAAGGGGGCUC

>hsa-mir-3664 MI0016065  
CUGUAAACUUGAAGGUAGGGAACUCUGUCUUCACUCAUGAGUACCUCCAACACGAGCUCUCAGG  
AGUAAAAGACAGAGUCCCCUACCUUCAUGUGGAU

>hsa-mir-3665 MI0016066  
GCGGGCGGCGGCGGCGGCAGCAGCAGGUGCGGGGCGGCGCCGCGCUGGCCGCUCGACUCCG  
CAGCUGCUCGUUCUGCUUCUCCAGCUUGCGCACCAGCUCC

>hsa-mir-3666 MI0016067  
AGUAAGGUCCGUCAGUUGUAAUGAGACCCAGUGCAAGUGUAGAUGCCGACUCCGUGGCAGAGUUC  
AGCGUUUCACACUGCCUGGUCUCUGUCACUCUAUUGAAUJAGAUUG

>hsa-mir-3667 MI0016068  
UGAGGAUGAAAGACCAUUGAGGAGAAGGUUCUGCUGGCUGAGAACCUUCCUCUCCAUGGGUCUU  
UCAUCCUCA

---

>hsa-mir-3668 MI0016069  
AUAUAUGAAAUGUAGAGAUUGAUCAAAAUAGUUUCUAUCAAAAUAGUUUUGAUCAAUCUCUGCAA  
UUUUUAUAUUAU

>hsa-mir-3670-1 MI0016071  
UCUAGACUGGUUAUAGCUGCUUUUGGAGCCUCACCUGCUGAGAGCUCACAGCUGUCCUUCUCUAGA

>hsa-mir-3671 MI0016072  
AUGUUUAUUGCUGCUGCUGUCACAUUUACAUGAAAAUAAAUGUAAAUAUUUUUAUUUCUAUCAA  
UAAGGACUAGUCUGCAGUGAUUAU

>hsa-mir-3672 MI0016073  
UCUUUGUGAUUACCAUGAGACUCAUGUAAAACAUCUUAGACUAUUACAAGAUGUUUUAUGAGUCU  
CAUGAUAAUCACAAAGA

>hsa-mir-3673 MI0016074  
AUAUAUAUAUAUGGAAUGUAUAUACGGAAUAUAUAUAUAUAUGGAAUGUAUAUACGGAAUAUAUA  
UAUAUAUGGAAUGUAUAUACGGAAUAUAUAUAUAUAUAU

>hsa-mir-3674 MI0016075  
ACAUCACUAUUGUAGAACCUAAGAUUGGCCGUUUGAGAUGUCCUUUCAAGUUUUUGCAUJUCUGA  
UGU

>hsa-mir-3675 MI0016076  
GGAUGAUAAAGUUAUGGGGCUUCUGUAGAGAUUUCUAUGAGAACAUCUCUAAGGAACUCCCCAAA  
CUGAAUUC

>hsa-mir-3677 MI0016078  
GGCAGUGGCCAGAGCCCUGCAGUGCUGGGCAUGGGCUUCUCGUGGGCUCUGGCCACGGCC

>hsa-mir-3678 MI0016079  
GAAUCCGGUCCGUACAAACUCUGCUGUGUUGAAUGAUUGGUGAGUUUGUUUGCUCAUUGAUUGAA  
UCACUGCAGAGUUUGUACGGACCGGAUUC

>hsa-mir-3679 MI0016080  
CGUGGUGAGGAUAUUGGCAGGGAAGGGGAGUUUCCCUCUAUUCUUCCCCCAGUAAUCUUCAUC  
AUG

>hsa-mir-3680-1 MI0016081  
AAAUUUAAGGAGGGACUCACUCACAGGAUUGUGCAAUUGCAAAGUUGGCUUUUGCAUGACCCUGG  
GAGUAGGUGCCUCCUAAAUAUU

>hsa-mir-3681 MI0016082  
ACUUCCAGUAGUGGAUGAUGCACUCUGUGCAGGGCCAACUGUGCACACAGUGCUUCAUCCACUAC  
UGGAAGU

>hsa-mir-3682 MI0016083  
UAAGUUAUAUAUGUCUACUUCUACCUGUGUUAUCAUAAUAAAGGUGUCAUGAUGAUACAGGUGGA  
GGUAGAAUAUAUAACUUA

>hsa-mir-3683 MI0016084  
GGGUGUACACCCCUGCGACAUUGGAAGUAGUAUCAUCUCUCCUUGGAUGCUACGAACAAUAUC  
ACAGAAGGUGUACACCC

>hsa-mir-3684 MI0016085  
AAUCUAAAGGACCUGUACUAGGUUUAACAUGUUGAGCAUUAUCUUAUGUUAGACCUAGUACACGUC  
CUUUAGAUU

>hsa-mir-3685 MI0016086

GUACAUUUCCUACCCUACCUAGAAGACUUGAGAUUAUAGUCUUUGGGGGGAUGGGCAAAGUAC  
>hsa-mir-3686 MI0016087  
CUCACCUCUAUUAUUUACCUUCUCUUACAGAUACUUUUUCUGCACUGGACAGUGAUCUGUAAGAG  
AAAGUAAAUGAAAGAGGUGAG  
>hsa-mir-3687 MI0016088  
CGCGCGUGCGCCCGAGCGCGGCCCGGUGGUCCCUCGCCGACAGGCGUUCGUGCGACGUGUG  
>hsa-mir-3688-1 MI0016089  
UCUUCACUUUCAAGAGUGGCAAAGUCUUUCCAUAUGUAUGUAUGUAUGUCUGUUACACAUUGGA  
AAGACUUUGCCACUCUUUAAAGUGAAGA  
>hsa-mir-3689b MI0016411  
GAUCCUGUGUCUCCUGGGGGUCUGAUCCUGUGCUUCCUGGGAGGUGUGAUUAUCAUGGUUCCUGG  
GAGGUGUGAUCCCGUGCUUCCUGGGAGGUGUGAUUAUUGUGGUUCCUGGGAGGUGUGAUCCCGUGC  
UCCUGGGAGGUGUGAUC  
>hsa-mir-3689d-2 MI0016835  
ACUGGGAGGUGUGAUCUCACACUCGUCUGGGAGGUGUGCUAUCGUCUCCUGGGAGGUGUGAUCC  
UGUUCUCCUGAGCG  
>hsa-mir-3689f MI0016837  
AGGUGUGAUUAUCGUGCUUCCUGGGACGUGUGAUGCUGUGCUUCCUGGGAGGUGUGAUCCACACU  
C  
>hsa-mir-3690-1 MI0016091  
CCCAUCUCCACCUGGACCCAGCGUAGACAAAGAGGUGUUUCUACUCCAUAUCUACCUGGACCCAG  
UGUAGAUGGG  
>hsa-mir-3691 MI0016092  
UUGAGGCACUGGGUAGUGGAUGAUGGAGACUCGGUACCCACUGCUGAGGGUGGGGACCAAGUCUG  
CGUCAUCCUCUCCUCAGUGCCUCA  
>hsa-mir-3692 MI0016093  
CCAUUCUGCUGGUCAGGAGUGGAUACUGGAGCAAUAGAUACAGUUCACACUGACACUGCAGAA  
GUGG  
>hsa-mir-3713 MI0016134  
GGUAUCCGUUUGGGGAUGGUUUCACUAUCCCCAGAUGGAUACCAA  
>hsa-mir-3714 MI0016135  
GAAGGCAGCAGUGCUCCCCUGUGACGUGCUCCAUCACCGGGCAGGGAAGACACCGCUGCCACCUC  
>hsa-mir-3907 MI0016410  
GGGUUGGAAAGCUGUAGGUGUGGAGGGCAUGGAUACGGGGGCAUGAGGGUGGGGUCCAGGCUG  
GACCAGGCCUGCCUGAGUCCCCCAGCAGGUGCUCCAGGCUGGCUCACACCCUCUGCCUCUCUCU  
CUUCCUCCUGGCCCAACCC  
>hsa-mir-3908 MI0016412  
GCCUGAGCAAUGUAGGUAGACUGUUUCUAAAAAAAAUAAAAAGUUAAAAAAAAUUUAUGUUAACGUG  
UAAUGUGUUUACUAAUUUUUUUUUUUUUUUUUGGAGACAGAGUCUCCUCUGUCGCCAGGC  
>hsa-mir-3909 MI0016413  
GGUAUGCUGUUGCGUGUCCUCCUCUGGGGAGCAGGCUCCGGGGACAGGGAAAAGCACACAAG  
GAACUUGUCCUCUAGGGCCUGCAGUCUCAUGGGAGAGUGACAUGCACCAGGACC  
>hsa-mir-3910-1 MI0016414  
CUUUUGCUGUCAGUUUUUCUGUUGCUUGUCUUGGUUUUAUGCCUUUUUAUAUCAAGGCACAUAAAA

GGCAUAAAACCAAGACAAGCAACAAAAAAGGAUUGAUCACAGAAG  
>hsa-mir-3911 MI0016415  
GGGUGAGGAUGUGUGUGGAUCCUGGAGGAGGCAGAGAAGACAGUGAGCUUGCCAGUUCUGGUUUC  
CAACACUUCUUUCCUGCGCUUCUCGAUUC C CAGAUUCGCACCC  
>hsa-mir-3912 MI0016416  
AGAGAGGAAUGAACAGUUAAAUAUAACAUGUCCAUAUUAUGGGUUAGUUGUGGACACAUAUAUA  
CGCAUAAUAUGGACAUGUUAAUUAACUGUUCUUUCU  
>hsa-mir-3913-1 MI0016417  
UUGUUUAUAUAAACUGAAAUAUUGGGACUGAUCUUGAUGUCUGCCAAAACCUUGGCAGACAUC  
AAGAUCAGUCCCAAUAUUUCAGUUUAUUAUAGACAG  
>hsa-mir-3914-1 MI0016419  
UGGACUUCAGAUUAACUUCUCAUUUCUGGUUCCUUCUAAUGAGUAUGCUUAAACUUGGUAGAAG  
GAACCAGAAAUGAGAAGUUGAGUAGGAACUCUA  
>hsa-mir-3915 MI0016420  
CAAGUUGGCACUGUAGAAUAUUGAGGAAAAGAUGGUCUUAUUGCAAAGAUUUUCAUAAGACCAU  
CCUUUCUCAUAUUCUGUGGUGUCAUCUUUG  
>hsa-mir-3916 MI0016422  
AUCCAGAGAAGAAGGAAGAAGAGGAAGAAAUGGCUGGUUCUCAGGUGAAUGUGUCUGGGUUCAG  
GGGAUGUGUCUCCUCUUUUCUUCUGGGAU  
>hsa-mir-3917 MI0016423  
GGCGCUUUUGUGCGCGCCCGGUCUGUUGGUGCUCAGAGUGUGGUCAGGCGGCUCGGACUGAGCA  
GGUGGGUGCGGGCUCGGAGGAGCGGC  
>hsa-mir-3918 MI0016424  
AGGCGGUUAAGCCAUGGGACAGGGCCGAGAUGGAGACUGCUC AAGGUCAAAGGGGUCUCCAGCU  
GGGACCCUGCACCUGGUUCGUAGCCCU  
>hsa-mir-3919 MI0016425  
CCUGAGCACCAUUUACUGAGUCCUUUGUUCUCUACUAGUUUGUAGUAGUUCGUAGCAGAGAACA  
AGGACUCAGUAAAUGGUGUCAGG  
>hsa-mir-3920 MI0016427  
ACUGAGUGAGGGAGUCAGAGAGUUAAGAGAAUAGUACAGGUGAGAUUGUACUGAUUAUCUUAAC  
UCUCUGACCCCUACUCAGU  
>hsa-mir-3921 MI0016428  
CCUAGCCAGUACAAGGCAUAUGGUACUCAAGAGACUUAGAAAUCCCUAAGUCUCUGAGUACCAU  
AUGCCUUGUACUGGGCUAGG  
>hsa-mir-3922 MI0016429  
GGAAGAGUCAAGUCAAGGCCAGAGGUCCCACAGCAGGGCUGGAAAGCACACCUGUGGGACUUCUG  
GCCUUGACUUGACUCUUUC  
>hsa-mir-3923 MI0016430  
GGUAGAGUGAGCUCUAAUCCAUAUACUAGCUUCUUUAUAAGAAGAGGAAACUAGUAAUGUUGG  
AUUAGGGCUCACUCUACU  
>hsa-mir-3924 MI0016432  
UAAAUGAAAAGUAGUAGUCAAAUAUGCAGAUCUAUGUCAUAUAUACAGAUUAUGUAUAUGUGACU  
GCUACUUUUUGUUUA  
>hsa-mir-3925 MI0016433

GUGGGAAUAGCAAGAGAACUGAAAAGUGGAGCCUGUCACAUCUCCAGACUCCAGUUUUAGUUCUCU  
UGCUAUUUCCAC  
>hsa-mir-3926-1 MI0016434  
AAAAUGGAGCUGGCCAAAAAGCAGGCAGAGACUUUAAAAGCGUCUCUGCCUGCUUUUUGGCCAGC  
UCCGUUUU  
>hsa-mir-3927 MI0016435  
UGCCAAUGCCUAUCACAUAUCUGCCUGUCCUAUGACAAACAUGGCAGGUAGAUUUUGAUAGGCA  
UUGGCA  
>hsa-mir-3928 MI0016438  
GCUGAAGCUCUAAGGUUCCGCCUGCGGGCAGGAAGCGGAGGAACCUUGGAGCUUCGGC  
>hsa-mir-3929 MI0016439  
AGUGGCUCACACCAGUAAUCCCAGCACUUUGGGAGGCUGAUGUGAGUAGACCACU  
>hsa-mir-3934 MI0016590  
CACAGCCUUCUGUCCCCAGUUUUCAGGUGUGGAAACUGAGGCAGGAGGCAGUGAAGUAACUUG  
CUCAGGUUGCACAGCUGGGAAGUGGAGCAGGGAUUUGAAUCC  
>hsa-mir-3935 MI0016591  
GGAUGUGUUCUGUCCCAGAAGGAGCUGAUGGUUGUAUCUAUGAAGGUAAGCAUUUUUGUAGUA  
CGAGCACCAGCCACCUAAGCAAAGGCAGAGAAUGCUUA  
>hsa-mir-3936 MI0016592  
AUGAUUCAGAGCAUCUGUCCAGUGUCUGCUGUAGAUCUCCUCAAUCCGUGUUUGGACGCUUCUGG  
UAAGGGGUGUAUGGCAGAUCCCGACAGAUGCACUUGGCAGCA  
>hsa-mir-3937 MI0016593  
AGAAGAAUGCCCAACCAGCCUCAGUUGCUACAGUUCUCCUGUUGUUUCAGCUCGACAACAACAGG  
CGGCUGUAGCAAUGGGGGGCUGGAUGGGCAUCUCAUUGUC  
>hsa-mir-3938 MI0016594  
AGGAAUUUUUAACCCGAUCACUAGAUUAUCUACAAGGGAAUUUUUUUUAAUUUAAAAAUUCCC  
UUGUAGAUAAACCCGGUGGUCAGGUUGGAUGGCUCCAUG  
>hsa-mir-3939 MI0016596  
CUGGCUUCCAAAGGCCUCUGUGUUGUCCUGUAUGUGGGCGUGCACGUACCUGUCACAUGUGUACG  
CGCAGACCACAGGAUGUCCACACUGGCUUCCAAACACAUCU  
>hsa-mir-3940 MI0016597  
GCUUAUCGAGGAAAAGAUCGAGGUGGGUUGGGGCGGGCUCUGGGGAUUUGGUCUCACAGCCCGGA  
UCCCAGCCCACUUACCUUGGUUACUCUCCUUCUUCU  
>hsa-mir-3941 MI0016598  
GAGUCAGAAUUCUAUCAGGCUGUGAUGCUCAGUUGUGUGUAGAUUGAAAGCCCUAAUUUUACAC  
ACAACUGAGGAUCAUAGCCUGAUGGUUCCUUUUUGUUU  
>hsa-mir-3942 MI0016599  
UCUUCAGUAUGACACCUCAAAAGAAGCAAUACUGUUAUCCUGAAAUAGGCUGCGAAGAUAAACAGU  
UUCAGAUAAACAGUAUUACAUCUUUGAAGUGUCAUAUUCACUGAC  
>hsa-mir-3943 MI0016600  
CACACAGACGGCAGCUGCGGCCUAGCCCCAGGCUUCACUUGGCGUGGACAACUUGCUAAGUAAA  
GUGGGGGUGGGCCACGGCUGGCUCUCCUACCUGGAC  
>hsa-mir-3944 MI0016601  
UCCACCCAGCAGGCGCAGGUCCUGUGCAGCAGGCCAACCGAGAAGCGCCUGCGUCUCCAUUUUC



---

GGGCUGGCCUGCUGCUCGACCGGACCUUGUGCCUGAUCUAAAUGCUG  
>hsa-mir-3945 MI0016602  
GAUGUUGAUGCACGUGACGGGGAGGGCAUAGGAGAGGGUUGAUUAAAAUGCAAUUACAGCCUCU  
UAUGC UUCCAAAGUGGGGGAUGAUUCAUGAU  
>hsa-mir-3960 MI0016964  
GGCGCCCCGGCUCCCCCGCGCCCCCGAUCGGGGCCGCGCUAGUAGUGGCGGCGGGGAGGCGGGG  
GCAGCGGCGGCGGCGGCGGAGGCGCC  
>hsa-mir-3972 MI0016990  
GCCCAUUGCCUUGGCUUGGGGUGGCAGUCCUGUGGGAAUGAGAGAUGCCAAACUGGACCUGCCA  
GCCCCGUUCCAGGGCACAGCAU  
>hsa-mir-3973 MI0016991  
GCCCAGGGUAGCUCUCUGUAUUGCUUGUUACAUUUUAGGAUUGCUUGCCCCUUGCUCCAAUGGUG  
CAGGCAGAAGAAAUGCAAACAAAGUACAGCAUUAGCCUUAGC  
>hsa-mir-3974 MI0016992  
GUUCAGGAAAAGGUCAUUGUAAGGUUAAUGCACCCAUAUUUAAUAUCAAACUAUGACAAUUU  
GACUACAGCCUUUCCGUACCCCUGCCAAAAC  
>hsa-mir-3975 MI0016993  
CAUGUAGGUGAGUGAUUGCUAUUUCAAAAGACUAGAGGUAGGAAAUGAGGCUAAUGCACUACUUC  
ACAUG  
>hsa-mir-3976 MI0016994  
UGAGGGAUUAGAGAGCAGGAAGAUUAAUGUCAUUAUUGGAGUUGGACUGCAGGGCUUCCUUUACA  
CAAUAAAUAUUGUAUGAAGUGCUGAUGUAACCUUACUGCAGCAUGACAUGGGAUUUGGCUGUUU  
UUAUGGCUC  
>hsa-mir-3977 MI0016995  
UUGUGCUUCAUCGUAAUUAACCUUAAGUGGUUCGGGUAAAUCACUUUAAUUUGUUUAUGUGUUGGC  
AGAAU  
>hsa-mir-3978 MI0016996  
UCAGUGGAAAGCAUGCAUCCAGGGUGUGGAGCCAAAUAUAGAAGGGCCAAAUAUCUACCUGGCCC  
ACUACCACAGCAACCUUGGGCAUCGUUUUCUUUUGA  
>hsa-mir-4251 MI0015861  
CACGUCCUCCAGCUUUUUUCCUJAGUGGCCAAUUCUGAGAAAAGGGCCAACGUGCUCUCA  
>hsa-mir-4252 MI0015864  
UGGGGGGCGUGGCAGCUCAUCAGUCCAGGCCAUCUGGCCACUGAGUCAGCACCAGCGCCCAAUC  
>hsa-mir-4253 MI0015860  
CCAGCCAUCGCCCCUUGAGGGGCCUAGGACUUACUUGUGCAGGGCAUGUCCAGGGGGUCCAGGUC  
UGC  
>hsa-mir-4254 MI0015862  
CUUGGGAGGAGGGUGGGGUGGCUCUUCUGCAGUGAGUAGGUCUGCCUGGAGCUACUCCACCAUCU  
CCCCAGCCCC  
>hsa-mir-4255 MI0015863  
GAGCAUCCUUCAGUGUUCAGAGAUGGAGUCAGUAUUGGUCUGGCCAUUUUUAGGGCAAAGAGGCA  
GCAUCAU  
>hsa-mir-4256 MI0015855  
UGUCCAUUUUAUCUGACCUGAUGAAGGUCUCCUGGCAUUGAUUAGGUCUGAUGAUCCAUUUCUG

---

>hsa-mir-4257 MI0015856  
GGCUUAGAAACAGUCCCUAGGUAGGAUUUGGGGAGGAGCUAAGAAGCCCCUACAGGGCCCAGAGG  
UGGGGACUGAGCCUUAGUUGG

>hsa-mir-4258 MI0015857  
ACGCCCCCGCCCCGCCACCGCCUUGGAGGCUGACCUCUUACUUUCGGUCGGUCUUCUUCUCCUGG  
GCUUGGUUUUGGGGGCGGGGAGUGUC

>hsa-mir-4259 MI0015858  
GAUGGGCCCCUUGUGUCCUGAAUUGGGUGGGGGCUCUGAGUGGGGAAAGUGGGGGCCUAGGGGAG  
GUCACAGUUUGGUCUAGGGGUCAGGAGGGCCCAGGA

>hsa-mir-4260 MI0015859  
AACAAAGGUGACUUGGGGCAUGGAGUCCCACUUCUGGAGCCCACACCCAGCUUGUCACACACCA  
AC

>hsa-mir-4261 MI0015868  
GGUGGAAGUGGGUUCUCCAGUUCUGAGACAGGAAACAGGGACCCAGGAGACCAGC

>hsa-mir-4262 MI0015872  
GAAAGCUGCAGGUGCUGAUGUUGGGGGACAUUCAGACUACCUGCAGCAGAGCC

>hsa-mir-4263 MI0015876  
AUAGUGCUCUUCAGGGUUUUACUUGGGAGAUUGGAGUGGCCAGUGUCCUAAACAAUUCUAAGUG  
CCUUGGCCACAACAUC

>hsa-mir-4264 MI0015877  
AAAGCUGGAUACUCAGUCAUGGUCAUUGUAACAUGAUAGUGACAGGUACUGGGUAAGACUGCAUA  
G

>hsa-mir-4265 MI0015869  
UGCAGUGGGUUGGAGCUUCAGCCUACACCUGUAAAGAAUUGGUCAGCCUGGGGACUGGUGAUCUC  
UGCAGCUGUGGGCUCAGCUCUGGGCUGGGCCUGG

>hsa-mir-4266 MI0015870  
CCACUGCUGGCCGGGGCCCCUACUCAAGGCUAGGAGGCCUUGGCCAAGGACAGUC

>hsa-mir-4267 MI0015871  
CUCAGCAGGCUCAGCUCGGUGGCACUGGGGGAAGGCUCAGACCCCAGCCUCUGUCAUCCCUGC  
AUGGAGCCCACAUCUCC

>hsa-mir-4268 MI0015874  
AUGCACAUCAGGUUCUAGAGGUUUUGCCCUAGCGGCUCUCCUCUCAGGAUGUGAUGUCACCUG

>hsa-mir-4269 MI0015875  
ACAGCGCCUGCAGGCACAGACAGCCCUGGCUUCUGCCUCUUUCUUUGUGGAAGCCACUCUGUCA  
GGCCUGGGAUGGAGGGGCA

>hsa-mir-4270 MI0015878  
ACAAAUAGCUUCAGGGAGUCAGGGGAGGGCAGAAAUAGAUGGCCUUCUCCUUGCUGGGAAGAAAGU  
GGGUC

>hsa-mir-4271 MI0015879  
AAAUCUCUCUCCAUAUCUUUCUGCAGCCCCAGGUGGGGGGAAGAAAAGGUGGGGAAUUAGAU  
UC

>hsa-mir-4272 MI0015880  
UUUUCUGCACAAAUAAUCAGUAAUGCAUAGAAAGCAUUCACUAGUGAUUGUGUUAUAAGAG

>hsa-mir-4273 MI0015881

UCCCCUGUGUGUGUUCUCUGAUGGACAGUAAGCCUUGACUUAUGGCUAAAUGCUUCUUCACAAUG  
GUCACAUGCAUAGGGCUUU  
>hsa-mir-4274 MI0015884  
GGGGCAUUUAGGGUAAACUGAGCUGCUGCCGGGGCCUGGCGCUCUACCUUGUCAGGUGACCCA  
GCAGUCCCUCCCCUGCAUGGUGCCC  
>hsa-mir-4275 MI0015883  
ACAUUUUUGUCCAAUUACCACUUCUUUUUGCCACCUGAGCACAGUCAGCAGUCAGCAUAAAAAAG  
UGAUAAAUGGGAAGUUAAUGUCU  
>hsa-mir-4276 MI0015882  
CACAGUCUGACUCAGUGACUCAUGUGCUGGCAGUGGCCACGUAAAUAGAGCUACUGUGUCUGAAA  
GCAAU  
>hsa-mir-4277 MI0015886  
CUGGGUCGAGGCAGUUCUGAGCACAGUACACUGGGCUGCCCCACUGCCCAGUGCCCUGCUCAGC  
UCAAGUCCUUGUGCCCCUC  
>hsa-mir-4278 MI0015888  
AUCUAAACACCAGGAGAAUCCCAUAGAACAUGACAUCAACACUAGGGGGUUUGCCCUUGUGGGGA  
AGAA  
>hsa-mir-4279 MI0015887  
UGCUCUGUGGAGCUGAGGAGCAGAUUCUCUCUCUCUCCUCCCGGCUUCACCUCCUGAG  
>hsa-mir-4280 MI0015889  
AAUCAGGGUGGAGUGUAGUUCUGAGCAGAGCCUUAAGGAUGAGGUAUGUUAAGACUGAAUGAC  
ACCUUUGUGAU  
>hsa-mir-4281 MI0015885  
GCUGGGGGUCCCCGACAGUGUGGAGCUGGGGCCGGGUCCCGGGGAGGGGGGUUCUGGGCAG  
>hsa-mir-4282 MI0015890  
GGUGAAGUUCAGGGGAAGAUUUUAGUAUGCCACAUUUCUAAAAUUUGCAUCCAGGAACAUCAU  
CU  
>hsa-mir-4283-1 MI0015892  
ACUCUGAUCCUGGGGCUCAGCGAGUUUGCAAGGGGUGUUUCUGUCCAUGGUCAGGCUUGCCAGCC  
UUGGUCCUUGGGCCC  
>hsa-mir-4284 MI0015893  
GUUCUGUGAGGGGCUCACAUCACCCCAUCAAGUGGGGACUCAUGGGGAGAGGGGGUAGUUAGGA  
GCUUUGAUAGAGGCGG  
>hsa-mir-4285 MI0015891  
AUUAGCUGGGGCGGCGAGUCCGACUCAUAUAUUUUAAGGAAUGACCCGGCCUUGGGGUGCGGA  
AUUGCUGCGGGCGGGGGC  
>hsa-mir-4286 MI0015894  
UACUUAUGGCACCCACUCCUGGUACCAUAGUCAUAAGUUAGGAGAUGUUAGAGCUGUGAGUACC  
AUGACUUAAGUGUGGUGGCUUAAACAUG  
>hsa-mir-4287 MI0015895  
UAGUUCUUUUUCUCCCUUGAGGGCACUUUUCAGUUCUGAGAUCAAUGUGGUCCUACUGGGGAG  
ACCAUAGGAGCCC  
>hsa-mir-4288 MI0015896  
AUGGAGGUGGAGAGUCAUCAGCAGCACUGAGCAGGCAGUGUUGUCUGCUGAGUUUCCACGUCAUU

UG

>hsa-mir-4289 MI0015898

CCUUGGGAGGGCAUUGUGCAGGGCUAUCAGGCAGUUUCCUGGGCCCUGUCUGCAGAGCCUAAACA  
GAUCA

>hsa-mir-4290 MI0015899

GCCACCAAGAAGGUGAAGGGAGGGUCAGUCCCAAUCUGAAUCCCACCAAAAUAGGUGGUAGAGGG  
UUGCCCUCCUUUCUUCCCUCACCUCUGACC

>hsa-mir-4291 MI0015900

CGCCGGGGGCUUCAGCAGGAACAGCUGGGUGGAGGCAGAGCUGUUCUGCUGUGGCUGCAGCCCUG  
>hsa-mir-4292 MI0015897

GAGACACCAGAAGGCCACCUGCUUAGGAGGCCAGAGGUGCCCCUGGGCCGGCCUUGGUGAGGGGGC  
CC

>hsa-mir-4293 MI0015826

AGAGACACCUGUCCUUGGGAAGCUGGUGACAUUGC UAAUUC AUUUCACACCAGCCUGACAGGAA  
CAGCCUGACUGAA

>hsa-mir-4294 MI0015827

CCGAUGCCUCGGGAGUCUACAGCAGGGCCAUGUCUGUGAGGGCCCAAGGGUGCAUGUGUCUCCCA  
GGUUUCGGUGC

>hsa-mir-4295 MI0015822

CUUUGUGGAACAGUGCAAUGUUUCCUUGCCUGUGGCAAGACCACUUCGGUUCAAGGCUAAGAAA  
CUAGACUGUCCUACAGAGA

>hsa-mir-4296 MI0015823

UUGGGCUUUGAUGUGGGCUCAGGCUCAGAGGGCUGAAGUGGUUGUGGGGAGGGGCUUCUGGGGAC  
UGUGUCCAUGUCUCUGUCGUUUU

>hsa-mir-4297 MI0015824

AGCACGCACGUGCCUCCUGUCUGUGCCUGCCUUCGAAGUGCACGGCAGGGCCAGGACGGGUCGC  
UGUGGGUGGGG

>hsa-mir-4298 MI0015830

GGGGAGGUACCUGGGACAGGAGGAGGAGGCAGCCUUGCCUCAGAAACCAAACUGUCAAAAAGUGUA  
GGUCCAC

>hsa-mir-4299 MI0015829

GGGUUCUGACCAAUCAUGUUACAGUGUUUUCUCCUUUAGAGAGAGCUGGUGACAUGAGAGGCAGA  
AAAAGGA

>hsa-mir-4300 MI0015831

UAGUUUAGAAGAGGGCCAGCUAAAUCAGCAGAGACAUGAGGUGAUCAAAAACCUUUUUCAAAG  
CAGUGGGAGCUGGACUACUUCUGAACCAAUA

>hsa-mir-4301 MI0015828

ACCAGCCACCUCACUACUUCACUUGUGAACAUAUGCAUUCGUGGAGGGUGGCAGGUGCAGCUCU  
G

>hsa-mir-4302 MI0015833

UCAGGAGGGACCAGUGUGGCUCAGCGAGGUGGCUGAGUUUACUUAAGGUUAUUGGAAUGAG

>hsa-mir-4303 MI0015834

AGAAAAUAGCUUCUGAGCUGAGGACAGCUUGCUCUGCUUUUCUUUAGCUUAGGAGCUAACCAUGG  
U

---

>hsa-mir-4304 MI0015832  
AGAGAAGUGGCCGGCAUGUCCAGGGCAUCCCCAUUGCUCUGUGACUGCUGCCAUCCUUCUCC

>hsa-mir-4305 MI0015835  
CUGCCUJAGACCUAGACACCUCAGUUCUGGGUUCUJAGAGGCCUAAUCCUCUACAAACUCAGUU  
UUCAGACUGUGAGGGAAAUCUCUGUCUUAUUGCUUU

>hsa-mir-4306 MI0015836  
AAGCUGCUJAGUGUCCUJAGAGUCUCCAGAGGCAUCCCUAACCCAGAAUCUUUUGACUGUCCUCU  
GGAGAGAAAGGCAGUAGGUCUGUACC

>hsa-mir-4307 MI0015838  
UCAGAAGAAAAACAGGAGAUAAAAGUUUGUGAUAAUGUUUGUCUAUAUAGUUAUGAAUGUUUUUU  
CCUGUUUCCUJAGGGCCA

>hsa-mir-4308 MI0015839  
UAUGGGUUCAGAGGGAAUCUCCAUUGGACAGAAAUUUCCUUUUGAGGAAAUCUUUCCCUGGAGUUU  
CUUCUJACCUUUUCC

>hsa-mir-4309 MI0015837  
UCUGGGGGUUCUGGAGUCUAGGAUJCCAGGAUCUGGGUUUJAGGUCUUGGGUUGUAGGGUCUGC  
GGUUUGAAGCCCCUCUUG

>hsa-mir-4310 MI0015840  
UGGCGUCUGGGGCCUGAGGCUGCAGAACAUUGCAGCAUUCAUGUCCCACCCCCACCA

>hsa-mir-4311 MI0015841  
UCAGAGAGGGGAAAGAGAGCUGAGUGUGACCUGGAGCAGCUCAGGAGGGCUUCCUGGGUGAGGUG  
GCAGGUJACAGGUUCGAUCUUUGGCCUCAGAUUC

>hsa-mir-4312 MI0015842  
GAAAGGUUGGGGGCACAGAGAGCAAGGAGCCUCCCCAGAGGAGUCAGGCCUUGUCCUGUCCCC  
AUUCCUCAGAG

>hsa-mir-4313 MI0015843  
GAUCAGGCCAGCCCCUGGCCCAAACCCUGCAGCCCCAGCUGGAGGAUGAGGAGAUGCUGGGC  
UUGGGUGGGGAAUCAGGGGUGUAAAGGGGCCUGCU

>hsa-mir-4314 MI0015846  
GGCCAUCCUCUCUGGGAAAUGGGACAGGUAGUGGCCACAGUGAGAAAGCUGGCCUUGCCUUCUG  
CCCCAGGGCCCAGAGUCUGUGACUGGA

>hsa-mir-4315-1 MI0015844  
UGGGCUUUGCCCGCUUUCUGAGCUGGACCCUCUCUCUACCUCUGGUGCAGAACUACAGCGGAAGG  
AAUCUCUG

>hsa-mir-4316 MI0015845  
AGUGGCCAGGGUGAGGCUAGCUGGUGUGGUCACCCACUCUCCAGCCCAGCCCCAAUCCCACCAC  
AACCAC

>hsa-mir-4317 MI0015850  
AAAAGGCGAGACAUUGCCAGGGAGUUJAUUUUGUAGCUCUCUJGAUAAAUGUUUJAGCAAACAC

>hsa-mir-4318 MI0015847  
GCUUCUJAAUJAGUCAUAAACCCACUGUGGACAAGGGCCUJUGUCUJAGACAGUCACUGUGGGUA  
CAUGCJAGGUGCJAA

>hsa-mir-4319 MI0015848  
UUGGCUJAGUCCCUGAGCAAAGCCACUGGGAAUGCUCUCCCUGAGGACGUUAUAUGAGUGCUCAGC

UCAUGGGGCUAUGAUGGUCA  
>hsa-mir-4320 MI0015849  
GACAUGUGGGGUUUGCUGUAGACAUUUCAGAUAAACUCGGGAUUCUGUAGCUUCCUGGCAACUUUG  
>hsa-mir-4321 MI0015852  
CUGGUCUCCGAGAGCCUCUGCCCCUCCCAGACACCCGCUACCUGGUGUUAGCGGUGGACCGCC  
CUGCGGGGGCCUGGC  
>hsa-mir-4322 MI0015851  
ACCGCGAGUUCGCGCCUGGCCGUGUCGCCCCACGAGGGGACUGUGGGCUCAGCGGUGGGGCC  
CGGAGCAU  
>hsa-mir-4323 MI0015853  
CGGGGCCAGGCGGGCAUGUGGGGUGUCUGGAGACGCCAGGCAGCCCCACAGCCUCAGACCUCGG  
GCAC  
>hsa-mir-4324 MI0015854  
CGGCCCUUUGUUAAGGGUCUCAGCUCCAGGGAACUUUAAAACCCUGAGACCCUAACCUUAAAGG  
UGCUGCA  
>hsa-mir-4325 MI0015865  
GGGAAGAUGUUGCACUUGUCUCAGUGAGAGAUGCUUCUAGAUCAGGAGGCAGACCUCAAGGAU  
GGAGAGAAGGCAGAUCCUUUGAGAU  
>hsa-mir-4326 MI0015866  
GCUGCUCUGCUGUUCUCUGUCUCCAGACUCUGGGUGGAUGGAGCAGGUCGGGGGCCA  
>hsa-mir-4327 MI0015867  
GGCCUGGGUAGGCUUGCAUGGGGACUGGGAAGAGACCAUGAACAGGUUAGUCCAGGGAGUUCUC  
AUCAAGCCUUACUCAGUAG  
>hsa-mir-4328 MI0015904  
AACAGUUGAGUCCUGAGAACCAUUGAGAACCAGUUUCCAGGAUUAACUGUUCGG  
>hsa-mir-4329 MI0015901  
UAGAGAGGAAGGUGUACCAGGUUUUGGAGUUUUUUUUUCCUCCUGAGACCCUAGUCCACAUUC  
UGGAGC  
>hsa-mir-4330 MI0015902  
AAUUGUCAGCAGGCAAUUAUCUGAGGAUGCAGGAGAGGAAGGGGCUUCUUUUUGACGCCUACUU  
CAUCAGCUGCUCCUCAGAUCAGAGCCUUGCAGGUCAGGCC  
>hsa-mir-4417 MI0016753  
GAAAAACAACCAGGUGGGCUUCCCGGAGGGCGGAACACCCAGCCCCAGCAUCCAGGGCUCACCUAC  
CACGUUUG  
>hsa-mir-4418 MI0016754  
UGGUUUUUGCUCUGAGUGACCGUGGUGGUUGUGGGAGUCACUGCAGGACUCAGCAGGAAUUC  
>hsa-mir-4419a MI0016755  
UGGUGGUGUGGCCUGUAGUCUUAAGCUACUCGGGAGGCUGAGGGAGGAGACUGCAGUGAGUGGAG  
GUCACGCCACUG  
>hsa-mir-4419b MI0016861  
CUCAGGCUCAGUGGUGCAUGC UUAUAGUCCCAGCCACUCUGGAGGCUGAAGGAAGAUGGCUUGAG  
CCU  
>hsa-mir-4420 MI0016757  
CUCUUGGUAUGAACAUUGUGUGUUAUGUCUCUCUGUGCACAGGGGACGAGAGUCACUGAUGUC

UGUAGCUGAGAC  
>hsa-mir-4421 MI0016758  
CUGGGUCUCCUUUCUGCUGAGAGUUGAACACUUGUUGGGACAACCUGUCUGUGGAAAAGGAGCUAC  
CUAC  
>hsa-mir-4422 MI0016759  
AGUUCUUCUGCAGACAAAAGCAUCAGGAAGUACCCACCAUGUACCAGUGGGCCCUUCUUGAUGCU  
CUUGAUUGCAGAGGAGCC  
>hsa-mir-4423 MI0016760  
AUCAUGUACUGCAGUUGCCUUUUGUUCUCAUGCUGUUUAAGCCUAGCAUAGGCACCAAAAAGCA  
ACAACAGUAUGUGAA  
>hsa-mir-4424 MI0016763  
CUUACAUCACACACAGAGUUAACUCAAAAUGGACUAAUUUUCCACUAGUUAGUCCAUUUCAAGU  
UAACUCUGUGUGUGAUGUAGU  
>hsa-mir-4425 MI0016764  
GUGCUUUACAUGAUGGUCCAUUGAAUCCCAACAGCUUUGCGAAGUGUUGUUGGGAUUCAGCAG  
GACCAUUCGUGUAAAAGUAA  
>hsa-mir-4426 MI0016765  
AGUUGGAAGAUGGACGUACUUUGUCUGACUACAAUAUUCAAAGGAGUCUACUCUUAUCUUG  
>hsa-mir-4427 MI0016766  
GAAGCCUCUUGGGGCUUAUUUAGACAAUGGUUUCAUCAUUUCGUCUGAAUAGAGUCUGAAGAGUC  
UUU  
>hsa-mir-4428 MI0016767  
UUGGCAGGUGCCAUGUUGCCUUCUCCUACUGUACACGUGGCUGGCAAGGAGACGGGAACAUGGA  
GCCGCCAU  
>hsa-mir-4429 MI0016768  
AGGGAGAAAAGCUGGGCUGAGAGGCGACUGGUGUCUAAUUUGUUUGUCUCUCCAACUCAGACUGC  
CUGGCCCA  
>hsa-mir-4431 MI0016771  
UGGUUUGCGACUCUGAAAACUAGAAGGUUUUAUGACUGGGCAUUUCACCCAAUGCCCAAUAUUG  
AACUUUCUAGUUGUCAGAGUCAUUAACCC  
>hsa-mir-4432 MI0016772  
GCAUCUUGCAGAGCCGUUCCAAUGCGACACCUCUAGAGUGUCAUCCCCUAGAAUGUCACCUUGGA  
AAGACUCUGCAAGAUGCCU  
>hsa-mir-4433b MI0025511  
UGUGUCCCCUAUCCUCCUUAUGUCCACCCCCACUCCUGUUUGAAUAUUUCACCAGAAACAGGAG  
UGGGGGGUGGGACGUAAGGAGGAUGGGGGAAAGAACA  
>hsa-mir-4434 MI0016774  
UCACUUUAGGAGAAGUAAAAGUAGAACUUUGGUUUUCAACUUUCCUACAGUGU  
>hsa-mir-4435-1 MI0016775  
AGGCAGCAAUUGCCAGAGCUCACACAGAGGGAUGAGUGCACUUCACCUGCAGUGUGACUCAGCA  
GGCCAACAGAUGCUA  
>hsa-mir-4436a MI0016776  
GCCUCACUUUCCACUUAUGCCUGCCCUGCCCCUCGAAUCUGCUCACGAUUUGGGCAGGACAGG  
CAGAAGUGGAUAAGUGAGGA

---

>hsa-mir-4436b-1 MI0017425  
GUGUCCUCACUUGUCCACUUCUGCCUGCCCUGCCCAAUGGUGGAGCAGAUUCGAGGGGCAGGGC  
AGGAAGAAGUGGACAAGUGAGGCCAU  
>hsa-mir-4437 MI0016778  
ACUUUGUGCAUUGGGUCCACAAGGAGGGGAUGACCCUUGUGGGCUCAGGGUACAAAGGUU  
>hsa-mir-4438 MI0016781  
UAAGUGUAAACUUAAGGACUGUCUUUUUAAGCCUGUGCCUUGCCUUUCCUUUGGCACAGGCUUA  
GAAAAGACAGUCUUUAAGUUUACACUUC  
>hsa-mir-4439 MI0016782  
CCAGUGACUGAUACCUUGGAGGCAUUUUUAUCAAGAUACACACAAAGCAAUGCCUCUAAGGUAU  
CAGUUUACCAGGCCA  
>hsa-mir-4440 MI0016783  
CUCUCACCAAGCAAGUGCAGUGGGGCUUGCUGGCUUGCACCGUGACUCCCUCUCACCAAGCAAGU  
GUCGUGGGGCUUGCUGGCUUGCACUGUGAAGAU  
>hsa-mir-4441 MI0016784  
CAGAGUCUCCUUCGUGUACAGGGAGGAGACUGUACGUGAGAGAUAGUCAGAUCCGCAUGUUAGAG  
CAGAGUCUCCUUCGUGUACAGGGAGGAGAUUGUAC  
>hsa-mir-4442 MI0016785  
GCGCCUCCUCUCUCCCCGGUGUGCAAUGUGUGUGUGCGGUGUUAUGCCGGACAAGAGGGAGG  
UG  
>hsa-mir-4443 MI0016786  
GGUGGGGGUUGGAGGCGUGGGUUUAGAACCUAUCCCUUUCUAGCCCUGAGCA  
>hsa-mir-4444-1 MI0016787  
GUGACGACUGGCCCCGCCUCUCCUCUCGGUCCCAUAUUGAACUCGAGUUGGAAGAGGCGAGUCC  
GGUCUCAA  
>hsa-mir-4445 MI0016788  
UUCCUGCAGAUUGUUUCUUUUGCCGUGCAAGUUUAAGUUUUGCACGGCAAAGAAACAAUCCAG  
AGGGU  
>hsa-mir-4446 MI0016789  
CUGGUCCAUUUCCUGCCAUUCUUUGGCUUCAUUUACUCCAGGGCUGGCAGUGACAUGGGUC  
AA  
>hsa-mir-4447 MI0016790  
GUUCUAGAGCAUGGUUUUCUCAUCAUUUGCACUACUGAUACUUGGGGUCAGAUAAUUGUUUGUGGU  
GGGGCUGUUUGUUUGCAUUGUAGGAU  
>hsa-mir-4448 MI0016791  
AGGAGUGACCAAAGACAAGAGUGCGAGCCUUCUAUUUUGCCAGACAGGGCCACCAGAGGGCUC  
CUUGGUCUAGGGUAAUGCCA  
>hsa-mir-4449 MI0016792  
AGCAGCCUCGGCGGCCCGGGGGCGGGCGGUGCCCGUCCGGGGCUGCGGAGGCACAGGC  
G  
>hsa-mir-4450 MI0016795  
UGUCUGGGGAUUUGGAGAAGUGGUGAGCGCAGGUCUUUGGCACCAUCUCCCCUGGUCCCUUGGCU  
>hsa-mir-4451 MI0016797  
UCUGUACCUCAGCUUUGUCUCCCAACCAACCACUCCACAUGUUUUGCUGGUAGAGCUGAGGACAG



C

>hsa-mir-4452 MI0016798  
UGGAUCACUUGAGGCCAAGAGUGCAAGGCUGUAGUGUGCACAGCCUUGAAUUCUUGGCCUUAAGU  
GAUCC

>hsa-mir-4453 MI0016799  
UGGAGAGCUUGGUCUGUAGCGGUUUCUUCGGGGCAGGUGGGGACUGCUCUUUGGGAGGAAGGA  
GGAGGCCAGGCCGCGUCUUCAGG

>hsa-mir-4454 MI0016800  
CCGGAUCCGAGUCACGGCACCAAAUUCUUGCGUGUCCGUGUGAAGAGACCACCA

>hsa-mir-4455 MI0016801  
AGAAGGGUGUGUGUUUUUCUGAGAAUAAGAGAAGGAAGGACAGCCAAAUUCUUCA

>hsa-mir-4456 MI0016802  
AUGAACCUUGGUGGUUCCUUUCUGGGAGGAAGUUAGGGUUCA

>hsa-mir-4457 MI0016803  
GGAGUACUCCAGUCAAUACCGUGUGAGUUAGAAAAGCUCAAUUCACAAGGUUAUUGACUGGCGUAU  
UCA

>hsa-mir-4458 MI0016804  
GAGCGCACAGAGGUAGGUGUGGAAGAAAGUGAAACACUAUUUUAGGUUUUAGUUACACUCUGCUG  
UGGUGUGCUG

>hsa-mir-4459 MI0016805  
ACCCAGGAGGCGGAGGAGGUGGAGGUUGCAGUGAGCCAAGAUCGUGGCACUGACUCCAGCCUGGG  
G

>hsa-mir-4460 MI0016806  
GUUUUUUGCCCAUAGUGGUUGUGAAUUUACCUUCUCCUCUUGCAGUGAUAAAGGAGGUAAAUUC  
ACAACCACUGUGGGCAGAAAC

>hsa-mir-4461 MI0016807  
GAGUAGGCUUAGGUUAUGUACGUAGUCUAGGCCAUACGUGUUGGAGAUUGAGACUAGUAGGGCUA  
GGCCUACUG

>hsa-mir-4462 MI0016810  
CUUCCAGCUGCCCUAAGUCAGGAGUGGCUUUCUGACACGGAGGGUGGCUUGGGAAA

>hsa-mir-4463 MI0016811  
AAUAGAUUAUUGGUCACCACCUCAGUUUCUGAAUUUGUGAGACUGGGGUGGGGCCUGAGAAUUU  
GC

>hsa-mir-4464 MI0016812  
GGAACCUUAGUAAGGUUUGGAUAGAUGCAAUAAAGUAUGUCCACAGCUGAAAGGACAUAUUUAU  
UGCAUGUAUCCAAACCUUACUAAUUCA

>hsa-mir-4465 MI0016816  
CAUGUGUCCCCUGGCACGCUAUUUGAGGUUUACUAUGGAACCUCAAGUAGUCUGACCAGGGGACA  
CAUGA

>hsa-mir-4466 MI0016817  
ACGCGGGUGCGGGCCGGCGGGGUAGAAGCCACCCGGCCCCGCCCCGGCCCCGGCGA

>hsa-mir-4467 MI0016818  
UGGUGGCGGCGGUAGUUAUGGGCUUCUCUUUCUACACCAGCAGCCCCUGGGCCGCCGCCUCCCU

>hsa-mir-4468 MI0016819

---

AGUCUUCUCCUGGGCUUUGGUGGCUAUGGUUGACUGGGCCACUCAGAGCAGAAGGAUGAGAUG  
>hsa-mir-4469 MI0016820  
CCGACGCGGAGAGCGGCUCUAGGUGGGUUUGGCGGCGGCGAGGACACCGCCGCUCUCCUCUAGGGU  
CGCUCGGAGCGUGA  
>hsa-mir-4470 MI0016821  
CGAGCCUCUUUCGGCUUCCAGUUUGUCUCGGUCCUUUGGAACGUGGCAAACGUGGAAGCCGAGA  
GGGCUCU  
>hsa-mir-4471 MI0016822  
CCAAAUUUAAAACUUAAACCUCUACUAAGUUUCCAUGAAAAGAACCCAUGGGAACUUAGUAGAGG  
UUUAAGUUUUAAAUUUGA  
>hsa-mir-4472-1 MI0016823  
UGGCAGACCCUUGCUCUCACUCUCCUAAUGGGGCUGAAGACAGCUCAGGGGCAGGGUGGGGG  
GUGUUUUUUUUUUUU  
>hsa-mir-4472-2 MI0016824  
UGGUGGGGGUGGGGGGUGUUUUUUUUUUUGAGACAGAGUCUUGCUCGCGCCAGGCCGGA  
GU  
>hsa-mir-4473 MI0016825  
AAGGAACAGGGGACACUUGUAAAUGGAGAACACUAAGCUAUGGACUGCUAUGGACUGCUAGUGCUC  
UCCGUUACAAGUAUCCCCUGUUACCU  
>hsa-mir-4474 MI0016826  
UUGCCUACCUUGUUAGUCUCAUGAUCAGACACAAAUAUGGCUCUUUGUGGCUGGUAUGAGGCUA  
ACAAGGUAGGCAC  
>hsa-mir-4475 MI0016827  
AUCUCAAUAGAGUGUGUGGUUCUAAAUGACUCAUAGUCAAGGGACCAAGCAUUCAUUAUGAA  
>hsa-mir-4476 MI0016828  
AAAAGCCUGUCCCUAAGUCCCUCCAGCCUCCAGAGUUGGUGCCAGGAAGGAUUUAGGGACAGG  
CUUUG  
>hsa-mir-4477a MI0016829  
UCCUCCUCCCAUCAUAUCACAAAUGUCCUUAUUGGCAUUUAAGGAUUGCUAUUUAAGGACAUUUGUG  
AUUCACGGGAGGAGGU  
>hsa-mir-4478 MI0016831  
GGCCGAGGCUGAGCUGAGGAGCCUCCAAACCUGUAGACAGGGUCAUGCAGUACUAGGGGCGAGCC  
UCAUCCCCUGCAGCCCUGGCC  
>hsa-mir-4479 MI0016838  
GAAACCAAGUCCGAGCGUGGCUGGCGCGGGAAAGUUCGGGAACGCGCGCGGCCGUGCUCGGAGCA  
GCGCCA  
>hsa-mir-4480 MI0016841  
GCAGAGGUGAGUUGACCUCACAGGGCCACCCAGGGAGUAAGUAGCCAAGUGGAAGUUACUUUAC  
CUCUGU  
>hsa-mir-4481 MI0016842  
GGAGUGGGCUGGUGUUUUUUUUAAGAGGAAGGGAGACCUAAGCUAGCACAUAGAGCACGCUC  
>hsa-mir-4482 MI0016843  
AGUGAGCAACCCAGUGGGCUAUGGAAAUGUGUGGAAGAUGGCAUUUCUAUUUCUCAGUGGGGCUC  
UUACC

---

>hsa-mir-4483 MI0016844  
AAAAACAACAUACUUAGUGCAUACCCAUAUAAUAUUAGGGGUGGUCUGUUGUUGUUUUUCU

>hsa-mir-4484 MI0016845  
GGGUUUCUCUGCCUUUUUUCCAAUGAAAAUAACGAAACCUGUUAUUUCCCAUUGAGGGGGAAA  
AAGGCGGGAGAAGCCCCA

>hsa-mir-4485 MI0016846  
AGAGGCACCGCCUGCCAGUGACAUGCGUUUAACGGCCGCGGUACCCUAACUGUGCA

>hsa-mir-4486 MI0016847  
GCAUGCUGGGCGAGGCUGGCAUCUAGCACAGGCGGUAGAUGCUUGCUCUUGCCAUUGCAAUGA

>hsa-mir-4487 MI0016848  
ACUGUCCUUCAGCCAGAGCUGGCUGAAGGGCAGAAGGGAACUGUCCUUCAGCCAGAGCUGGCUGA  
AGGGCAGA

>hsa-mir-4488 MI0016849  
GGUAGGGGGCGGGCUCGCGCUGGGACCCACUAGGGUGGCGCCUUGGCCCCGCCCCGCC

>hsa-mir-4489 MI0016850  
GGGGUGGGGCUAGUGAUGCAGGACGCUGGGGACUGGAGAAGUCCUGCCUGACCCUGUCCCA

>hsa-mir-4490 MI0016852  
AUAGUUUCUGCAAUGCUGAAUCUCUGGCCAAAGACCAGAAACUUAUUGGUCUCUGGUAAGAGAUU  
UGGGCAUAUUAGAAACUAA

>hsa-mir-4491 MI0016853  
ACAUUUGGUCACACCAGUCCACAUAACGUGGACCAGACAAUAUUAUUGGACUGGUGUGACCA  
AAA

>hsa-mir-4492 MI0016854  
CUGCAGCGUGCUUCUCCAGGCCCGCGCGGACAGACACACGGACAAGUCCCGCCAGGGGCUGG  
GCGCGCGCCAGCCGG

>hsa-mir-4493 MI0016855  
CCAGAGAUGGGAAGGCCUUCGUGAUUAUCACAGCCAUGCCUUUACCUCAGAAAGCCUUUCCA  
UCUCUGUC

>hsa-mir-4494 MI0016856  
AGUUUUAGUUACCCUGGUCAUCUGCAGUCUGAAAAUACAAAAUGGAAAAUCCAGACUGUGGCUG  
ACCAGAGGUAACUGAAACC

>hsa-mir-4495 MI0016857  
AAGAAAUGUAAACAGGCCUUUUUGCUCAGUGGAGUUAUUUUGAGCAAAAAGCUUAUUUACAUUUCU  
G

>hsa-mir-4496 MI0016858  
ACAUCAGCUCAUAUAAUCCUCGAAGCUGCCUUUAGAAAUGAGGAAACUGAAGCUGAGAGGG

>hsa-mir-4497 MI0016859  
ACCUCGGGACGGCUGGGCGCCGGCGGGGAGAUCCGCGCUUCCUGAAUCCCGGCCGGCCCGC  
CCGGCGCCCGUCCGCCCGCGGGUC

>hsa-mir-4498 MI0016860  
AGGGCUGGGCUGGCAGGGCAAGUGCUGCAGAUCUUUGUCUAAGCAGCCCCUGCCUUGGAUCUCCC  
A

>hsa-mir-4499 MI0016862  
AAGACUGAGAGGAGGGAACUGGUGAGUUGUACAUAAGAAAUGCUUUCUAACUCCUUGUCUCAGUCU

GUUU  
>hsa-mir-4500 MI0016863  
CAGGAGAGAAAGUACUGCCCAGAAGCUAAAGUGUAGAUCAAACGCAUAAUGGCUGAGGUAGUAGU  
UUCUUGAACUU  
>hsa-mir-4501 MI0016864  
UAUGUGACCUCGGAUGAAUCACUGAAAU AUGUCUGAGCUUCUGUUUCAUCAGAUGUCACAUUUU  
>hsa-mir-4502 MI0016865  
AGCCUUUAGCAAGUUGAAUCUUUUUGCUGAUGGAGGGUCUUGCCUCCAUGGGGAUGGCUGAUGA  
UGAUGGUGCUGAAGGC  
>hsa-mir-4503 MI0016866  
ACAAUGUAGAUUUUAAGCAGGAAUAGAAUUUACAUAUAAAUUUCUAUUUGUUUCUAUUUCCUG  
CUUAAAUAUCUACAUUGC  
>hsa-mir-4504 MI0016867  
CUAAGAUAAUGUCCUCCAGGUUCAUCUCUGUUGUCAUUUGUGGCAUGGACCAUUUGUGACAAUAG  
AGAUGACAUGGAGGAUUAUCUUA  
>hsa-mir-4505 MI0016868  
GGAGGCUGGGCUGGGACGGACACCCGGCCUCCACUUUCUGUGGCAGGUACCUCUCCAUGUCGGC  
CCGCCUUG  
>hsa-mir-4506 MI0016869  
UGGCCUCUGCCAUCAGACCAUCUGGGUUAAGUUUGGCUCCAUCUUUAUGAAAUGGGUGGUCUGA  
GGCAAGUGGUCU  
>hsa-mir-4507 MI0016871  
UCUGGGCUGAGCCGAGCUGGGUUAAGCCGAGCUGGGUUGGGCUGGGCUGGGU  
>hsa-mir-4508 MI0016872  
AGGACCCAGCGGGCUGGGCGCGGGAGCAGCGUGGGUGCAGCGCCUGCGCCGGCAGCUGCAAG  
GGCCG  
>hsa-mir-4509-1 MI0016873  
CUUUAAUACUAUCUCAAAACUAAAAGGAUUAAGAAGGUUUUCCUUUCUCUUGCCCUGAAACCUUCU  
GUAUCCUUUAUUUUGAGAUAGUAUJAGAA  
>hsa-mir-4510 MI0016876  
GUGUAUGUGAGGGAGUAGGAUGUAUGGUUGUUAGAUAGACAACUACAAUCUUUCACACAACAGA  
CAG  
>hsa-mir-4511 MI0016877  
AAAAAAAAGGGAAAGAAGAACUGUUGCAUUUGCCCUGCACUCAGUUUGCACAGGGUAAAUGCAAU  
AGUUCUUCUUUCCUUUUUUUA  
>hsa-mir-4512 MI0016878  
CUCAGCCCGGCAUAUAGUGAGACCUCGUCUCUACAAAAAAUUGAGACAGGGCCUCACUGUAUC  
GCCCAGGCUGGA  
>hsa-mir-4513 MI0016879  
AUUCUAGGUGGGGAGACUGACGGCUGGAGGCCCAUAAGCUGUCUAAAACUUCGGCCCCCAGAUUU  
CUGGUCUCCCCACUUCAGAAC  
>hsa-mir-4514 MI0016880  
GUUGAGACAGGCAGGAUUGGGGAAACAUCUUUUACCUCGUCUCUUGCCUGUUUUAGA  
>hsa-mir-4515 MI0016881

GCGGGAGGUGUAACAGGACUGGACUCCCGGCAGCCCCAGGGCAGGGGCGUGGGGAGCUGGUCCUA  
GCUCAGCGCUCCCGGA  
>hsa-mir-4516 MI0016882  
AGGGAGAAGGGUCGGGGCAGGGAGGGCAGGGCAGGCUCUGGGGUGGGGGGUCUGUGAGUCAGCCA  
CGGCUCUGCCCACGUCUCCCC  
>hsa-mir-4517 MI0016883  
AGGUAAAUAUGAUGAAACUCACAGCUGAGGAGCUUAGCAAGUAGCUAAGGCCAGAGCUUGUGUUU  
GGGUGGUGUGGCUG  
>hsa-mir-4518 MI0016884  
UGGGGGAAAAGUGCUGGGAUUGAUUAGUGAUGUCUGCUGGGGAACCGGGGCUCAGGGAUGAUAAAC  
UGUGCUGAGAAGCCCCCU  
>hsa-mir-4519 MI0016885  
AACCUCAGCAGUGCGCAGGGCUGCACUGUCUCCGUCUGCGGCCUGCAGUAAGCGGGUA  
>hsa-mir-4520a MI0016886  
GUGUGCCACCUGCGUGUUUCUGUCCAAAUCAGAAAAGGAUUUGGACAGAAAACACGCAGGAAGA  
AGGAA  
>hsa-mir-4521 MI0016887  
UCGGCUAAGGAAGUCCUGUGCUCAGUUUUGUAGCAUCAAACUAGGAUUUCUCUUGUAC  
>hsa-mir-4522 MI0016889  
GCGGGCGUUGCCUGGGGGCCUCGCAGGGGGAGAUCAGCCCAGGCUGGUUCCGCUGACUCUGCCU  
GUAGGCCGGUGGCGUCUUCUGG  
>hsa-mir-4523 MI0016890  
GCGGGGGACCGAGAGGGCCUCGGCUGUGUGAGGACUAGAGGCGGCCGAGGCCCGGGCCGGUCCCC  
CCGA  
>hsa-mir-4524a MI0016891  
GAACGAUAGCAGCAUGAACCGUCUCACUGCAGAAUUAUUUGAGACAGGCUUAUGCUGCUAUCC  
UUCA  
>hsa-mir-4524b MI0019114  
UAGCUGGGUGGAUGUGUUCUUUGAAGGAUAGCAGCAUAAGCCUGUCUAAAAUAAUUCGCAGU  
GAGACAGGUUCAUGCUGCUAUCGUUCCAAAGAGGAAGGGUAAUCACUGUC  
>hsa-mir-4525 MI0016892  
GUCAGAGGGGGGAUGUGCAUGCUGGUUGGGGUGGGCUGCCUGUGGACCAAUCAGCGUGCACUUC  
CCACCCUGAA  
>hsa-mir-4526 MI0016893  
UGCGGUGACAUCAGGGCCAGUCCUGCUGUCAUGCCCCAGGUGACGUGCUGGGCUGACAGCAGG  
GCUGGCCGCUAACGUCACUGUC  
>hsa-mir-4527 MI0016894  
CCAGAAGUGGUCUGCAAAGAGAUGACUGUGAAUCCAAGAUCACAUCAGCUCUGUGCUGCCUACA  
UCUGA  
>hsa-mir-4528 MI0016895  
UAUUCUACUGAGAGUACAGAUCUUUAUAUAUAUGAUAUAUAUGUAUGAUGAGAUAUAUAUG  
UAUGAUCUGGACACCCAGUAGAAUC  
>hsa-mir-4529 MI0016896  
AUGACAGGCCAUCAGCAGUCCAAUGAAGACAUGAAGACCCAAUGUCUUCUUGGACUGCUGAUGG

CCCGUCACUGGGA  
>hsa-mir-4530 MI0016897  
CGACCCGCACCCGCCGAAGCUGGGUCAAGGAGCCCAGCAGGACGGGAGCGCGGCGC  
>hsa-mir-4531 MI0016898  
GCCUAGGAGUCCUUGGUCAGUGGGGACAUGGAGAAGGCUUCUGAGGA  
>hsa-mir-4532 MI0016899  
ACAGACCCCGGGGAGCCCGGCGGUGAAGCUCUGGUAUCCUGGGUGUCUGA  
>hsa-mir-4533 MI0016900  
UGAGAAUGUGGAAGGAGGUUGCCGGACGCUGCUGGCUGCCUUCAGCGUCCACUUCCUUCUCU  
CUCUCC  
>hsa-mir-4534 MI0016901  
UGUGAAUGACCCCUUCCAGAGCCAAAUCACCAGGGAUGGAGGAGGGGUCUUGGGUACU  
>hsa-mir-4535 MI0016903  
AACUGGGUCCAGUCUUCACAGUUGGUUUCUGACACGUGGACCUGGCUGGGACGAUGUG  
>hsa-mir-4536-1 MI0016906  
AUGUGGUAGAUUAUAGCACGAUAUAUAUCUGCCCUGCUUUUAUACAUAACAUAACAUAACCUA  
UAUCGUGCAUAUAUCUACCACAU  
>hsa-mir-4536-2 MI0019149  
AUGUGGUAGAUUAUAGCACGAUAUAGGUAUGUAUGUAUGUAUGUAUAAAAGCAGGGCAGUAUAUA  
UAUCGUGCAUAUAUCUACCACAU  
>hsa-mir-4537 MI0016908  
UGAGCCGAGCUGAGCUUAGCUGGGCUGAGCUAACCCAGGGCUGGGCUGAGCUGGGCUGAGCUGAGC  
UGAGC  
>hsa-mir-4538 MI0016909  
GAGCUUGGAUGAGCUGGGCUGAACUGGGCUGGGUUGAGCUGGGCUGGGCUGAGUUGAGCCAGGCU  
GAUCUGGGCUGAG  
>hsa-mir-4540 MI0016911  
AAGCUGCAUGGACCAGGACUUGGCACCUUUGGCCUUGAGUCCUGCCUGUAGGUUA  
>hsa-mir-4632 MI0017259  
GAGGGCAGCUGGGUGUGGGCGGAGGCAGGCGUGACCGUUUGCCGCCUCUCGCUGCUCUAG  
>hsa-mir-4633 MI0017260  
UGGCAAGUCUCCGAUAUGCCUGGCUAGCUCUCCACAAAUGCGUGUGGAGGAGCUAGCCAGGCA  
UAUGCAGAGCGUCA  
>hsa-mir-4634 MI0017261  
GGACAAGGGCGGCGCGACCGGCCCGGGCUCUUGGGCGGCCGCGUUUCCCCUCC  
>hsa-mir-4635 MI0017262  
CCGGGACUUUGUGGGUUCUGACCCACUUGGAUCACGCCGACAACACUGGUCUUGAAGUCAGAAC  
CCGCAAAGUCCUGG  
>hsa-mir-4636 MI0017263  
UAGAUUCAGAACUCGUGUUCAAAAGCCUUUAGCCCAGCAAUGGGAGAGUGCUAAAAGGCUUCAAGCA  
CGAGUUCUGAAUCUA  
>hsa-mir-4637 MI0017264  
CCCUUACUUGGAUCUGCAAUAGUAUUUUAAUCAUAGAUUGUAUUUAGUUUUUUAAUACUAA  
CUGCAGAUUCAAGUGAGGG

---

>hsa-mir-4638 MI0017265  
GACUCGGCUGCGGUGGACAAGUCCGGCUCCAGAACCUGGACACCGCUCAGCCGGCCGCGGCAGGG  
GUC

>hsa-mir-4639 MI0017266  
UUGC UAAGUAGGCUGAGAUUGAUGUCAGGUUAUCCCCAAGCAUAACCUCACUCUCACCUUGCUUU  
GCAG

>hsa-mir-4640 MI0017267  
CUGUGGGCUGGGCCAGGGAGCAGCUGGUGGGUGGGAAGUAAGAUCUGACCUGGACUCCAUCCCAC  
CCACCCCUUUUCCUGGCCACAG

>hsa-mir-4641 MI0017268  
GGGGGGCAGGGGGCAGAGGGCAUCAGAGGACAGCCGCCUGGUGCCCAUGCCAUACUUUUGCCUCA  
G

>hsa-mir-4642 MI0017269  
CACAACUGCAUGGCAUCGUCCCCUGGUGGCUGUGGCCUAGGGCAAGCCACAAAGCCACUCAGUGA  
UGAUGCCAGCAGUUGUG

>hsa-mir-4643 MI0017270  
GUGUGCCCUAGCAUUUAUAAUCAUGUGUUCAUUCACAUGAUCUAAGUGGACACAUGACCAUAAA  
UGC UAAAGCACAC

>hsa-mir-4644 MI0017271  
GCGGCGGUGCUCUGCCUCUUUCUCCAUCCACCCUGGUCCAGGUCCACAGCAGUGGAGAGAGAAAA  
GAGACAGAAGGAUGGCCGU

>hsa-mir-4645 MI0017272  
UGAUAGGGAAACCAGGCAAGAAAUAUUGUCUCCUCAAGUUGCGACGAGACAGUAGUUCUUGCCUG  
GUUUCUCUAUCA

>hsa-mir-4646 MI0017273  
ACUGGGAAGAGGAGCUGAGGGACAUUGCGGAGAGGGUCUCACAUUGUCCCUCUCCCUCUCCAG

>hsa-mir-4647 MI0017274  
CCAGGAGGGUGAAGAUGGUGCUGUGCUGAGGAAAGGGGAUGCAGAGCCCUGCCCAGCACCACCAC  
CUCCUAUGCUCUCCUGG

>hsa-mir-4648 MI0017275  
UGUGGGACUGCAA AUGGGAGCUCAGCACCUGCCUGCCACCCACGCAGACCAGCCCCUGCUCUGUU  
CCCACAG

>hsa-mir-4649 MI0017276  
UCUGGGCGAGGGGUGGGCUCUCAGAGGGGUGGCAGUACUGCUCUGAGGCCUGCCUCUCCCAG

>hsa-mir-4650-1 MI0017277  
UUCUGUAGAGAUUAUCAGGCCUCUUUCUACCUUCCAAGGCUCAGAAGGUAGAAUGAGGCCUGACA  
UAUCUGCAGGA

>hsa-mir-4651 MI0017279  
CGGCGACGGCGGGGUGGGUGAGGUCGGGCCCAAGACUCGGGGUUUGCCGGGCGCCUCAGUUCAC  
CGCGGCCG

>hsa-mir-4652 MI0017280  
UAUUGGACGAGGGGACUGGUUAAUAGAACUAACUAACCAGAACUAUUUUGUUCUGUUAACCCAUC  
CCCUCAUCAAUA

>hsa-mir-4653 MI0017281

UUGUCCAAUUCUCUGAGCAAGGCUUAACACCAAAGGGUUAAGGGUUUGCUCUGGAGUUAAGGGUU  
GCUUGGAGAAUUGGAGAA  
>hsa-mir-4654 MI0017282  
CUGGCUGGUUGUGGGGAUCUGGAGGCAUCUGGGGUUGGAAUGUGACCCCAGUCUCCUUUJCCCUCA  
UCAUCUGCCAG  
>hsa-mir-4655 MI0017283  
CCAAGGGCACACCGGGGAUGGCAGAGGGUCGUGGGAAAGUGUUGACCCUCGUCAGGUCCCCGGGG  
AGCCCCUGG  
>hsa-mir-4656 MI0017284  
AGGCUGGCGUGGGCUGAGGGCAGGAGGCCUGUGGCCGGUCCCAGGCCUCCUGCUUCCUGGGCUCA  
GGCUCGGUUU  
>hsa-mir-4657 MI0017285  
AAUGUGGAAGUGGUCUGAGGCAUAUAGAGUAUAUGCCAAGAACACUACCAUUAU  
>hsa-mir-4658 MI0017286  
GCUGCCCUUCACUCAGAGCAUCUACACCCACUACCGGUGAGUGUGGAUCCUGGAGGAAUCGUGGC  
>hsa-mir-4659a MI0017287  
GAAACUGCUGAAGCUGCCAUGUCUAAGAAGAAAACUUUGGAGAAAAUUUUUCUUCUAGACAUGG  
CAACGUCAACAGUUUC  
>hsa-mir-4660 MI0017288  
ACUCCUUCUGCAGCUCUGGUGGAAAUGGAGAAGACUUUUCUUUCCUCCAUCUCCCCCAGGGCC  
UGGUGGAGU  
>hsa-mir-4661 MI0017289  
UUUACUCUGAACUAGCUCUGUGGAUCCUGACAGACAGCCUGAUAGACAGGAUCCACAGAGCUAGU  
CCAGAGUAAA  
>hsa-mir-4662b MI0017293  
CACAAUUCUAUUUAGCCAAUUGUCUAUCUUUAGGCAUUCAGAAUAGCUAAAGAUGGACAAUUGG  
CUAAAUAGACACUGUG  
>hsa-mir-4663 MI0017292  
CUGUGGUGGAGCUGAGCUCCAUGGACGUGCAGUGGCAUCUGUCAUUGCUGCCUCCUGGAGCUCA  
GGCCCUUGCAG  
>hsa-mir-4664 MI0017294  
GUUGGGGGCUGGGGUGCCCACUCCGCAAGUUAUCACUGAGCGACUCCGGUCUGUGAGCCCCGUC  
CUCCGC  
>hsa-mir-4665 MI0017295  
CUCGAGGUGCUGGGGACGCGUGAGCGCGAGCCGCUUCCUCACGGCUCGGCCGCGCGUAGCC  
CCCGCCACAUCGGG  
>hsa-mir-4666a MI0017296  
AUCACUUAAAUAUGUCAGAUUGUAUGCCUACAAAUCCCUCCAGACUGGCAUACAAUCUGACA  
UGUAUUUAAGAGAU  
>hsa-mir-4666b MI0019299  
UGUCUAAAUUGCAUGUCAGAUUGUAAUCCCAGGCCCUUCCUCCAUAUCUGGGAAUJACAAUUG  
ACAUGCAAUUUAGACA  
>hsa-mir-4667 MI0017297  
UGACUGGGGAGCAGAAGGAGAACCCAAGAAAAGCUGACUUGGAGGUCCCUCCUUCUGUCCCCACA



G

&gt;hsa-mir-4668 MI0017298

AGGGAAAAAAAAAAGGAUUUGUCUUGUAGCCAGGAUAUUGUUUAAAGAAAUCCUUUUUGUUUU  
UCCAG

&gt;hsa-mir-4669 MI0017300

GCCUCCCUUCACUUCUGGCCAUCCAGGCAUCUGUGUCUGUGUCCGGGAAGUGGAGGAGGGC

&gt;hsa-mir-4670 MI0017301

CUCUAGGAAGCGACCAUGAUGUAACUUCACAGACUCUCCAAAAGUCUGAAGUUACAUCAUGGUCG  
CUUCCUAGAG

&gt;hsa-mir-4671 MI0017302

UAUUUUAAGACCGAAGACUGUGCGCUAAUCUCUUAGCACUGAAGAUUAGUGCAUAGUCUUUGGUC  
UCAAAAUA

&gt;hsa-mir-4672 MI0017303

GGCUGCUUCUCGCCUCUGUCCAGCUGUGUGGCCUUGGACAAGCCUCUUGGUUACACAGCUGGACA  
GAGGCACGAAACAGCC

&gt;hsa-mir-4673 MI0017304

GUCCAGGCAGGAGCCGGACUGGACCUCAGGGAAGAGGCUGACCCGGCCCCUCUUGCGGC

&gt;hsa-mir-4674 MI0017305

CCCAGGCGCCCGCUCCCGACCCACGCCGCGCCGCGGGUCCUCCUCCCCGGAGAGGCUGGGCUC  
GGGACGCGCGGCUCAGCUCGGG

&gt;hsa-mir-4675 MI0017306

CAUGAGAAAUCCUGCUGGUCAACCAUAGCCCUGGUCAGACUCUCCGGGGCUGUGAUUGACCAGCA  
GGACUUCUCAUG

&gt;hsa-mir-4676 MI0017307

UGAAUGAAAGAGCCAGUGGUGAGACAGUGAGUUGAUUACUUCUCACUGUUUCACCACUGGCUCUU  
UGGUUCA

&gt;hsa-mir-4677 MI0017308

GCAAAGCAGCAAUUGUUCUUUGGUCUUUCAGCCAUGACCUGACCUUCUGUCUGUGAGACCAAAGA  
ACUACUUUGCUUGGC

&gt;hsa-mir-4678 MI0017309

GGAAAAACAAGUAUUGUUCAGACUUAUGAUUUUUGGGUCAAAGAUUCUGAGCAAUAACCUAU  
UAAAAACC

&gt;hsa-mir-4679-2 MI0017311

UAUCUUUUUUCUGUGAUAGAGAUUCUUUGCUUUUUGUUUCUAAACAAAGCAAAGAAUCUCUAUCAC  
AGAAAAAGACG

&gt;hsa-mir-4680 MI0017312

UAUAAGAACUCUUGCAGUCUUAGAUGUUAAAAUAUAUAUCUGAAUUGUAAGAGUUGUUAGCA  
C

&gt;hsa-mir-4681 MI0017313

GGCAACGGGAAUGCAGGCUGUAUCUGCAGGGCAUUGUGCUAACAGGUGCAGGCUGCAGACCUGUC  
ACAGGCC

&gt;hsa-mir-4682 MI0017314

UGCCCCUGGUCUGAGUUCUGGAGCCUGGUCUGUCACUGGGGAAGUCCAGAGCUCCAAGGCUCAG  
UGCCCAGGGGACGCA

---

>hsa-mir-4683 MI0017315  
GACACGCAAGACGAGGCGGGCCUGGAGGUGCACCAGUUCUGGCCGCUGGUGGAGAUCAGUGCUC  
GCCC GAUCUCAAGUUC

>hsa-mir-4684 MI0017316  
GCACCAGGGGUACCUCUCUACUGACUUGCAACAUAUAUUGUCUUGGUGUGUUGCAAGUCGGUGG  
AGACGUACCCUUGGUGC

>hsa-mir-4685 MI0017317  
UAGCCAGGGCUUGGAGUGGGGCAAGGUUGUUGGUGAUAUGGCCUCCUCUCCCUCCUGCCCUGG  
CUAG

>hsa-mir-4686 MI0017318  
GGCUUCCUGUAUCUGCUGGGCUUUCUGGUGUUGGCAGCCCAAGAUGACACCCUGGGCCAGCAGG  
AGCCAGAAGCC

>hsa-mir-4687 MI0017319  
ACCUGAGGAGCCAGCCUCCUCCCGCACCCAAACUUGGAGCACUUGACCUUUGGCUGUUGGAGGG  
GGCAGGCUCGCGGGU

>hsa-mir-4688 MI0017321  
GUCUACUCCAGGGUGCCAAGCUGUUUCGUGUUCUCCUCCUAGGGGAUCCAGGUAGGGGCAGCA  
GAGGACCUGGGCCUGGAC

>hsa-mir-4689 MI0017322  
GGUUUCUCCUUGAGGAGACAUGGUGGGGGCCGGUCAGGCAGCCCAUGCCAUGUGUCCUCAUGGAG  
AGGCC

>hsa-mir-4690 MI0017323  
GAGCAGGCGAGGCUGGGCUGAACCCGUGGGUGAGGAGUGCAGCCAGCUGAGGCCUCUGC

>hsa-mir-4691 MI0017324  
GGAGCACUCCAGGUCCUCCAGGCCAUGAGCUGCGGCCCUGAUGUCUCUACUCCAGCCACGGACU  
GAGAGUGCAUAGGAGUGUCC

>hsa-mir-4692 MI0017325  
GUUUUACUUGAUACCCACACUGCCUGGGUGGGACACUCAGGCAGUGUGGGUAUCAGAUAAAAC

>hsa-mir-4693 MI0017326  
GUUUAAAAGAAUACUGUGAAUUUCACUGUCACAAAUUCAAUAAAGUGAGAGUGGAAUUCACAGUA  
UUUAAGGAAU

>hsa-mir-4694 MI0017327  
CAAAUACAUAAGGUGUUAUCCUAUCCAUIUGCCUCUCUCAGAAAAUAGAGUCAAAUGGACAGGAUA  
ACACCUAUGUAUUUG

>hsa-mir-4695 MI0017328  
CCUGCAGGAGGCAGUGGGCGAGCAGGCGGGGCAGCCCAAUGCCAUGGGCCUGAUCUCACCGCUGC  
CUCCUCCCC

>hsa-mir-4696 MI0017329  
CAAAGCCACUGCAAGACGGAUACUGUCAUCUAUUCAGAAUGACAUGUCCAUIUUGCAGUGG  
CUUUG

>hsa-mir-4697 MI0017330  
GGGCCAGAAAGGGGGCGCAGUCACUGACGUGAAGGGACCACAUCCCGCUUCAUGUCAGUGACUCC  
UGCCCCUUGGUCU

>hsa-mir-4698 MI0017331

UGCUUUCUCCUGGGGUCUCCUCUACAUUUCCACCUAGACGGGCCUGGGUCAAAAUGUAGAGGAAG  
ACCCCAGAAGGAGCA

>hsa-mir-4699 MI0017332

AGCAAUUGGAGAAGAUUGCAGAGUAAGUUCUGAUUAAGAAAUGGAAUUUACUCUGCAAUCUUCU  
CCAAUUGCU

>hsa-mir-4700 MI0017333

UCAGUGAGGUCUGGGGAUGAGGACAGUGUGUCCUGAAAUUCACAGGACUGACUCCUCACCCCAGU  
GCACGAGGA

>hsa-mir-4701 MI0017334

CCUUGGCCACCACACCUACCCCUUGUGAAUGUCGGGCAAUGGGUGAUGGGUGUGGUGUCCACA

>hsa-mir-4703 MI0017336

UUAUGCAUUAUAGCAAUACAGUACAAUAUAGUGUGUUUGAUUUGCACUGUAGUUGUAUUGUAUU  
GCCACUCUGUAUAA

>hsa-mir-4704 MI0017337

CUUAUCCUAGACACUAGGCAUGUGAGUGAUUGUCUCCUCACUCAUUCAGUCACAUAUCUAGUGU  
CUAGAAUGAG

>hsa-mir-4705 MI0017338

CUCACAAGAUCAAUCACUUGGUAUUGCUGUGAUAAACAACUCAGCAAUUACCAAGUGAUUGGUUU  
UGUGAG

>hsa-mir-4706 MI0017339

GCUACGGGGAGCGGGGAGGAAGUGGGCGCUGCUUCUGCGUUAUCUGGAAGGAGCAGCCACUCCU  
GUCCUGGGCUCUGUGGU

>hsa-mir-4707 MI0017340

GGUUCGGAGCCCCGGCGCGGGCGGGUUCUGGGGUGUAGACGCUGCUGGCCAGCCCGCCCAGCC  
GAGGUUCUCGGCACC

>hsa-mir-4708 MI0017341

UUUAGGAGAGAGAUGCCGCCUUGCUCUUGAACAGGAGGAGCAAGGCGGCAUCUCUCUGAUACUA  
AA

>hsa-mir-4709 MI0017342

CUGCUUCAACAACAGUGACUUGCUCUCCAAUGGUAUCCAGUGAUUCGUUGAAGAGGAGGUGCUCU  
GUAGCAG

>hsa-mir-4710 MI0017344

GACCGAGUGGGGUGAGGGCAGGUGGUUCUCCCCGAAGCAGCUCUCGCCUCUUCGUC

>hsa-mir-4711 MI0017345

AAAUGUGCAUCAGGCCAGAAGACAUGAGCCUUUGGAAAAGGUCUCGUGUCUUCUGGCUUGAUGCA  
CAUUU

>hsa-mir-4712 MI0017346

GACAGGAUUCAGUACAGGUCUCUCAUUUCCUUCUAUGAUUAGGAAUACUACUUUGAAAUGAGAGA  
CCUGUACUGUAUCUGUU

>hsa-mir-4713 MI0017347

GUCCCCAUUUUCUCCACUACCAGGCUCCCAUAAGGGUCGAAUGGGAUCCAGACAGUGGGAGAA  
AAAUGGGGAC

>hsa-mir-4714 MI0017348

AUUUUGGCAACUCUGACCCCUUAGGUUGAUGUCAGAAUGAGGUGUACCAACCUAGGUGGUCAGA

GUUGGCCAAAAU  
>hsa-mir-4715 MI0017349  
GGGGAAUGAAAGUUGGCUGCAGUUAAGGUGGCUAAUCAGCUGAUGGUGCCACCUUAAACUGCAGCC  
AAUUCUAAUUCCCC  
>hsa-mir-4716 MI0017350  
CAUACUUUGUCUCCAUGUUUCCUUCUUCCCCUUCUGUAUACAUGUAUACAGGAGGAAGGGGGAAGGA  
ACAUGGAGACAAAGUGUG  
>hsa-mir-4717 MI0017352  
GGCAGUGUUUAGGCCACAGCCACCCAUGUGUAGGGGUGGCUACACAUGGGUGGCUGUGGCCUAAA  
CACUGCC  
>hsa-mir-4718 MI0017353  
AGCUGUACCUGAAACCAAGCACCUGUUUGUGACUUGGCUUCAGUUACUAGC  
>hsa-mir-4719 MI0017354  
ACAAUGAUGACUUGUAUGUUUAUAGAUUUGUGAUUACAUAUAAAACUAAAAUUUCACAAAUCUAUA  
AUAUGCAGGUCAUCACUGU  
>hsa-mir-4720 MI0017355  
AAGCCUGGCAUUAUUUGGUAUAACUUAAGCACCAGGUAAAAUCUGGUGCUUAAGUUGUACCAAGUA  
UAGCCAAGUUU  
>hsa-mir-4721 MI0017356  
GGGCCUGGUCAUGGUCAAGCCAGGUUCCAUCAAGCCCCACCAGAAGGUGGAGGCCCAGGUGAGGG  
CUCCAGGUGACGGUGGGCAGGGU  
>hsa-mir-4722 MI0017357  
GGCAGGAGGGCUGUGCCAGGUUGGCUGGGCCAGGCCUGACCUGCCAGCACCUCUCCUGCAG  
>hsa-mir-4723 MI0017359  
AGUUGGUGGGGAGCCAUGAGAUAAAGAGCACCUCUAGAGAAUGUUGAACUAAAGGUGCCUCUC  
UGGCUCUCCCCAAAG  
>hsa-mir-4724 MI0017361  
ACGCAAAAUGAACUGAACCAGGAGUGAGCUUCGUGUACAUAUCUAUUAGAAAAUGAAGUACCUU  
CUGGUUCAGCUAGUCCUGUGCGU  
>hsa-mir-4725 MI0017362  
GUGUCUCUCUGGAGACCCUGCAGCCUCCCCACCCACCAGGGAGCUUCCAUGGGCUGUGGGGAAG  
GCGUCAGUGUCGGGUGAGGGAACAC  
>hsa-mir-4726 MI0017363  
AGGGCCAGAGGAGCCUGGAGUGGUCGGGUCGACUGAACCAGGUUCCCUCUGGCCGCA  
>hsa-mir-4727 MI0017364  
AAUCUGCCAGCUUCCACAGUGGCAGAUUUUCCCAUAGUGGGAAGCUGGCAGAUUC  
>hsa-mir-4728 MI0017365  
GUGGGAGGGGAGAGGCAGCAAGCACACAGGGCCUGGGACUAGCAUGCUGACCUCUCCUGCCCC  
AG  
>hsa-mir-4729 MI0017366  
UCUGUUUCCUCAUUUAUCUGUUGGGAAGCUAACUGUGACCUUAGCGUCCCAGCAGAUAAAUGAGG  
AAACAGA  
>hsa-mir-4730 MI0017367  
CGCAGGCCUCUGGCGGAGCCCAUCCAUGCCAGAUGCUGAGCGAUGGCUGGUGUGUCUGCUCCA

CAGGCCUGGUG  
>hsa-mir-4731 MI0017368  
CCCUGCCAGUGCUGGGGCCACAUGAGUGUGCAGUCAUCCACACACAAGUGGCCCAACACUGG  
CAGGG  
>hsa-mir-4732 MI0017369  
GAGGGAGCUGUAGAGCAGGGAGCAGGAAGCUGUGUGUGUCCAGCCCUGACCUGUCCUGUUCUGCC  
CCCAGCCCCUC  
>hsa-mir-4733 MI0017370  
GGUCGCUAAAUCCCAAUGCUAGACCCGGUGGCAAUCAAGGUCUAGCCACCAGGUCUAGCAUUGG  
GAUUUAAGCCC  
>hsa-mir-4734 MI0017371  
CUCGGGCCCGACCGCGCCGGCCCGCACCUCGCGCCCGGAGCUGCGGGCUGCGGUCAGGGCGAUC  
CCGGG  
>hsa-mir-4735 MI0017372  
UGCAGUGCCUAAUUUGAACACCUUCGGUAUUCAUCAAAAAUACCAAAGGUGCUAAAUUAGACAU  
UGCA  
>hsa-mir-4736 MI0017373  
AGGCAGGUUAUCUGGGCUGCCAUCUCCACUGGCUGCUUGCCUGCCU  
>hsa-mir-4737 MI0017374  
CUGCACAGGAUGCGAGGAUGCUGACAGUGCCUCACAGCCGCACAGGACCGAGGAUGCUGACGGUG  
CCUCACAGCCACACAG  
>hsa-mir-4738 MI0017376  
GGUCGCAUUUCUCCUUCUACCAGCGGUUUUCAGUUUCAUAGGGAAGCCUUUCCAUGAAACUGG  
AGCGCCUGGAGGAGAAGGGGCC  
>hsa-mir-4739 MI0017377  
GGGAGGAAGAAGGGAGGAGCGGAGGGGCCCUUGUCUUCCCAGAGCCUCUCCCUUCCUCCCCU  
CCCCUCCC  
>hsa-mir-4740 MI0017378  
GCCAAGGACUGAUCCUCUCGGGCAGGGAGUCAGAGGGGACCGCCCGAGAGGAUCCGUCCCUGC  
>hsa-mir-4741 MI0017379  
CGGGCGGGGCGGGUCCGGCCGCCUCCGAGCCCGGCCGAGCCCCGGCCUAAAGCGCGGGCUG  
UCCGGAGGGGUCGGCUUCCACC  
>hsa-mir-4742 MI0017380  
UCAGGCAAAGGGAUUAUUACAGAUACUUUUUAAAAUUUGUUUGAGUUUGAGGCAGAUAAAUAUCU  
GUAUUCUCCUUUGCCUGCAG  
>hsa-mir-4743 MI0017381  
GCUGGCCGGAUGGGACAGGAGGCAUGAAUGAGCCAUCUUCCAAUGCCUUUCUGUCUUUUCUGGU  
CCAG  
>hsa-mir-4744 MI0017382  
GUAUUCACAUCUAAAGACUAGACUUCGCUAUGACCAGGCCAUAGUAAACAUCAUAGUAUGUCUAG  
UCUUUAGGUUUGAUUAC  
>hsa-mir-4745 MI0017384  
GUGAGUGGGGCUCCCGGGACGGCGCCCGCCUGGCCUGGCCCGGCGACGUCUCACGGUCCC  
>hsa-mir-4746 MI0017385

GUGUCUGUGCCGGUCCAGGAGAACCUGCAGAGGCAUCGGGUCAGCGGUGUCUCCUGCGGGCCGAC  
ACUCAC

>hsa-mir-4747 MI0017386

AGGGAAGGAGGCUUGGUCUUAGCACGGGGUCUAAGGCCCGGGCUUCCUCCAG

>hsa-mir-4748 MI0017387

UGGCUUGGUCAGGUUUGGGGAGGAUUUGCUGGUGCUAGAGAGGAAAGCAGACCCUACCCAACCCC  
ACGCCUACUACAGCCA

>hsa-mir-4749 MI0017388

CCUGCGGGGACAGGCCAGGGCAUCUAGGCUGUGCACAGUGACGCCCCUCCUGCCCCACAG

>hsa-mir-4750 MI0017389

CGCUCGGGCGGAGGUGGUUGAGUGCCGACUGGCGCCUGACCCACCCCUCCCGCAG

>hsa-mir-4751 MI0017390

CCCGGAGCCAGAGACCCGUAGCUGCUAGAAGGGCAGGGGUGUGGCUUCUGGGGGCUGGUCUUCA  
GCUCUGGCG

>hsa-mir-4752 MI0017391

AGUGUCUCCUUGUGGAUCUCAAGGAUGUGCUUCCACAUAGCAGCAUGUUCUUCAGAUGGACAAGG  
AGACACU

>hsa-mir-4753 MI0017392

AUAUCUACACAAGGCCAAAGGAAGAGAACAGAUUAUCCACAGUACACUUGGCUGUUCUUCUUCU  
UUAGCCUUGUGUAGAUAU

>hsa-mir-4754 MI0017394

ACGCGCCUGAUGCGGACCUGGGUUAGCGGAGUGAGGCCCAGUGGUCACCGCCGCCUCCGCAGGU  
CCAGGUUGCCGUGCGCAUGUGCCU

>hsa-mir-4755 MI0017395

AGAUCAGCUUCCUUCAGAGCCUGGCUUUGGCAUCUAUGAAAGCCAGGCUCUGAAGGGAAAGU  
UGAAUCU

>hsa-mir-4756 MI0017397

GGGAUAAAUGCAGGGAGGCGCUCACUCUCUGCUGCCGAUUCUGCACCAGAGAUGGUUGCCUCC  
UAUAUUUUGUGUC

>hsa-mir-4757 MI0017398

UUCAGCCCGAGGCCUCUGUGACGUCACGGUGUCUGCGGGAGGAGACCAUGACGUCACAGAGGCU  
UCGCGCUCUGAG

>hsa-mir-4758 MI0017399

GGUGAGUGGGAGCCGGUGGGGUCUGGAGUAAGGGCACGCCCGGGGUCGCCCCACCUGCUGACCACC  
CUCCCC

>hsa-mir-4759 MI0017400

CAUUUAGGACUAGAUGUUGGAAUAGACAGAAAAAAGUUAGACACAAAAAUUGUGUCUAAUUC  
AACAUUCUAGUCCUAAAUG

>hsa-mir-4760 MI0017401

GCCAUGGUGUUUAGAUAUGAACAUGAAGUUAGAAUUCUUAAGUAUCAAACUAAAUUCUUGUCAA  
UCUAAAACCCCAUGGC

>hsa-mir-4761 MI0017402

GGACAAGGUGUGCAUGCCUGACCCGUUGUCAGACCUGGAAAAAGGGCCGGCUGUGGGCAGGGAGG  
GCAUGCGCACUUUGUCC

---

>hsa-mir-4762 MI0017403  
CUGAUACCCCAAUCUUGAUCAGAAGCCUUGAUCAGAAGCUAGGAAGGCUUCUGAUCAAGAUUUG  
UGGUGUCAAG

>hsa-mir-4763 MI0017404  
CCUGUCCCUCUGGCCUGCGCCUGCCCAGCCUCCUGCUCUGGUGACUGAGGACCGCCAGGCAGG  
GGCUGGUGCUGGGCGGGGGCGGCGGG

>hsa-mir-4764 MI0017405  
UCUUCCCCAUGGAUGUGGAAGGAGUUAUCUGUCACCAGUCAGAUAAACUGUCACCAGUCAGUUAAC  
UCCUUCACACCCAUGGGGAAGA

>hsa-mir-4765 MI0017406  
UGGUGAUUUUGAACGUAGCUAUCCACCACUCAGCCUGGAAAAAGCUGAGUGAUUGAUAGCUAUGU  
UCAAAAUCACCA

>hsa-mir-4766 MI0017407  
CUGAAGCUCUUCUGAAAGAGCAGUUGGUGUUUAUUUUUACUAAAUAGCAAUUGCUCUUUUGGA  
AGGAACUUGAG

>hsa-mir-4767 MI0017408  
ACAUGGGCCCGCGGGCGCUCUCCUGGCCGCCGCCGACUUCGGGGCCAGCCGGGGGCAGAGCGCGCG  
GGAGCCCGAGCGU

>hsa-mir-4768 MI0017409  
AAACUUUGAUUCUCUCUGGAUCCCAUGGAUAUGGGAACUGUGAUGUCCAGGAGAUCAGAGAGAA  
UCAGAGUUU

>hsa-mir-4769 MI0017410  
GAGGAGAGGUGGGGAUGGAGAGAAGGUAUGAGCUAAAAUCCCAAGCUCUGCCAUCCUCCUCCC  
CUACUUCUCCCC

>hsa-mir-4770 MI0017411  
GAGUUAUGGGGUCAUCUAUCCUUCUUGGAAAAUGAUCUGAGAUGACACUGUAGCUC

>hsa-mir-4771-1 MI0017412  
GCUCUAGCCUAAUUUAGAUCUGGUCUGCUUCAGUUUCACUCCAAGCAGACUUGACCUACAAUUA  
GCCUAGAGC

>hsa-mir-4772 MI0017414  
GUGAUUGCCUCUGAUCAGGCAAAAUUGCAGACUGUCUCCCAAUAGCCUGCAACUUUGCCUGAU  
CAGAGGCAGUCAC

>hsa-mir-4773-1 MI0017415  
UGCUCUCCAGCCUUUCUAUGCUCUUGUUCUGCUUUUAUUUCAUCAAAGCAGAACAGGAGCAUAGAA  
AGGCUGGGGAGCA

>hsa-mir-4774 MI0017417  
UAUAUUGUUGUCUGGUAUGUAGUAGGUAUAACUGACAAACAGACAAUUGCCUAACAUGUGCCAG  
AAAACAACAUA

>hsa-mir-4775 MI0017418  
AUUAAGCUUUUAAUUUUUUGUUUCGGUCACUCUUGAUAGCAGACAUUGACUGAAACAAAAAUUA  
AAAGCUUUAU

>hsa-mir-4776-1 MI0017419  
CUAUAUGCAGUGGACCAGGAUGGCAAGGGCUCUCCUGAAAGGACAGUAGAGCCCUUGCCAUCCUG  
GUCCACUGCAUAUAG

---

>hsa-mir-4777 MI0017421  
UAGAAUAUUUCGGCAUUCUAGAUGAGAGAUUAUAUAUACCUCAUAUGUAUAUGGUUAUACCUCAU  
CUAGAAUGCUGUAAUAUUCUA

>hsa-mir-4778 MI0017422  
UCACAUGUCCAAUUCUGUAAAGGAAGAAGAGGUAAGAAGAAGUGAAGCCCUCUUCUCCUUUGCA  
GAGUUGAAUAUGUGG

>hsa-mir-4779 MI0017423  
UAAAUGUCUUACUGCUUUUACUGUUCUCCUCCUAGAGUCCAUCUUAUACUCUAGGAGGGAAUAGUA  
AAAGCAGUAAGACAUUUA

>hsa-mir-4780 MI0017424  
GGCCAGUGCCAGGGGUCAGGCUCAAGGACCAGCCCAAAGGCCAGGCCUGACCCUUGAGCCUGAU  
CCCUAGCACUGAUCCC

>hsa-mir-4781 MI0017426  
AGGUGCACGCUCUAGCGGGGAUUCCAAUAUUGGGCCAAUUCUCCCCAAUGUUGGAAUCCUCGCUAG  
AGCGUGCACUU

>hsa-mir-4782 MI0017427  
AUUGCCCAGUUCUGGAUAUGAAGACAAUCAAGAAAAGAUUUGGUGUUCUUGAUUGUCUUCAUAUC  
UAGAACUGGGCAGU

>hsa-mir-4783 MI0017428  
GGGAAAGCGGAGGGCGCGCCAGCUCUCCGGGCUGAUUGCGCUAACAGUGGCCCCCGGUGUUGGGGC  
GCGUCUGCCGCGUCCCC

>hsa-mir-4784 MI0017429  
UGACUGGGCUGAGGAGAUGCUGGGACUGAGAGUGUCAUGGUGGAGCCUCCGUCCCUGCUCAUCCU  
CUCCGCAUGUUG

>hsa-mir-4785 MI0017430  
GUAGGUGGGGACGCGGCGGCGCUCUCCUCCGUGCCGCGGGAGAGUCGGCGACGCCGCCAGCU  
CCGCGCGC

>hsa-mir-4786 MI0017433  
GGGCAUGGCCUGAGACCAGGACUGGAUGCACCACUCUCCUUGUGAUGAGGUGAAGCCAGCUCUGG  
UCUGGGCCAUUUCAC

>hsa-mir-4787 MI0017434  
CGGUCCAGACGUGGCGGGGUGGCGGCGCAUCCCGGACGGCCUGUGAGGGAUGCGCCGCCACU  
GCCCCGCGCCGCGUACCG

>hsa-mir-4788 MI0017435  
AAUGAAGGAUUACGGACCAGCUAAGGGAGGCAUUAGGAUCCUUAUUCUUGCCUCCCUCUAGUUGGU  
CCCUAAUCCUUCGUU

>hsa-mir-4789 MI0017436  
CAUGCUCAGUAUGUAUACACCUGAUAUGUGUAUGUGUAAAUAUCAUAUCCACACACAUAAGCAGGUG  
UAUAUAUAGGUAGCCUG

>hsa-mir-4790 MI0017437  
CAAUGUGACAUCGCUUUACCAUUCUAGUUCACUGAAAGGUAGAUUUUAAAAACAUGAAUGGUAAA  
GCGAUGUCACAUUG

>hsa-mir-4791 MI0017438  
UAAGAACUGGAUAUGAUGACUGAAUAAGCUCCAUAUCAAUAGAGAAUUUCAUUGGGAUUAUGUGC



---

AGUCA AUGUCCAGUAAUUA  
>hsa-mir-4792 MI0017439  
GCAGCCC GGUGAGCGCUCGCUGGCCUGGCAGUGCGUCGGAAGAACAGGGCGGGUGGGGCCGCGCA  
CAUCUCUGC  
>hsa-mir-4793 MI0017440  
UUUCUCCUCGCUGCCC GCACAUCCUGCUCACAGGGCAGAGGGAGGCCAAGAAGACCUCUGCACU  
GUGAGUUGGCUGGCUGGAGGAA  
>hsa-mir-4794 MI0017441  
UUUUACAUCUGGCUAUCUCACGAGACUGUAUGUCCU AACAGUGCUUGUAGUCUCAUGAGAUAGC  
CAGAUGUUAAAA  
>hsa-mir-4795 MI0017442  
UGAU AUGGAAGAAAUCCAGAAGUGGCUAAUAAUUAUGACACUAUAACAAUAAUGUCAAUUUAUU  
AGCCACUUCUGGAUUUAUGAAUCA  
>hsa-mir-4796 MI0017443  
UAAAUUUGUGUCUAUACUCUGUCACUUUACUUUUGGCCUCAAGUCAUUGCAGUAAAGUGGCAGAG  
UAUAGACACAAUUUA  
>hsa-mir-4797 MI0017444  
GACUCAGAAGACAGAGUGCCACUACUGAAAGGUUUUUUCUCUCAGUAAGUGGCACUCUGUCUUC  
UGAGUU  
>hsa-mir-4798 MI0017445  
AAGUACAACUUCGGUAUACUUUGUGAAUUGGCUUUUACAAAAGACCAACUCACGAAGUAUACCGA  
AGUCAUACUU  
>hsa-mir-4799 MI0017446  
ACUGC UAAUAUCUAAAUGCAGCAUGCCAGUCCUGAGAUGCAGGGACUGGCAUGCUGCAUUUAU  
AUUAGCAGU  
>hsa-mir-4800 MI0017448  
GGAGAAAGGAGUGGACCGAGGAAGGAAGGAAGGCAAGGCUGUCUGUCCAUC CGUCCGUCUGUCCA  
CCUACCGUCAGUCC  
>hsa-mir-4801 MI0017449  
UUGAGGCUUGGUUUUCUUAUGUGUAAAUGUAAUAACA UUCUUAUGUUUAAAACACUUUACACA  
AGAAAACCAAGGCUCAA  
>hsa-mir-4802 MI0017450  
CUGACUGGCUUGUAUGGAGGUUCUAGACCAUGUUAGUGUUCAAGUCUACAUGGAUGGAAACCUUC  
AAGCAGGCCAAGCAG  
>hsa-mir-4803 MI0017451  
AGUGGGAUUUACAUAUAGUGUGGAUUGAAUCACACACACAUUUCAACCCACACUAUGAUGUUA  
AAUCCCAU  
>hsa-mir-4804 MI0017452  
UCAGUGUAUUUGGACGGUAAGGUUAAGCAAGGUGCGUCGUAUCUUGCUUAACCUUGCCCUCGAAA  
UACACUGA  
>hsa-mir-4999 MI0017865  
AUAGAAAUA AAAACACAUACUCUGCUUAUUGUCAGGUAGUGAUAGGAUUUAUCACUACCUGACAAU  
ACAGUAUGUGUUUGUUUAUAUAUU  
>hsa-mir-5000 MI0017866

CUGAAGAGUAGAGUGUGUGGGUCCAGUUCAGAAGUGUUCUGAGUAACUUGUGCUUAUAACUCAG  
GACACUUCUGAACUUGGACCAUACAGGUCUCCCUGCUU  
>hsa-mir-5001 MI0017867  
AGCUCAGGGCGGCUGCGCAGAGGGCUGGACUCAGCGGCGGAGCUGGCUGCUGGCCUCAGUUCUGC  
CUCUGUCCAGGUCCUUGUGACCCGCCCGCUCUCCU  
>hsa-mir-5002 MI0017868  
UCUCCUCUCUGUCCUCUGGAAUUGGUUUCUGAGGCACUAGUAGGUGAUAGCAUGACUGACUG  
CCUCACUGACCACUCCAGAUAGGGGUACUC  
>hsa-mir-5003 MI0017869  
AUGAGUUUGCUUUGUGUCAUCCUCACAACAACCUUGCAGGGUAGAGAUGAUUUUUCCUACUUUUC  
UAGGUUGUUGGGGCUGGGGCAGGGGAACAGAG  
>hsa-mir-5004 MI0017870  
GGCACUUGCUUGGGGUUAGUGAGGACAGGGCAAUUCACGAGAUUGGGUUGUGCAGAGGCUGAC  
ACUUGGAUUUCCUGGGCCUCAGGACUCCUUUCAGACAUGG  
>hsa-mir-5006 MI0017873  
AACCAUJAGGGGGCUGUGGUUUGCCAGGGCAGGAGGUGGAAGGGAGCCCCAUUUACAGUGGUAAC  
UUCCUUUCCUUUCCAUCCUGGCAGGCUUCAGAGAACUUUACCAG  
>hsa-mir-5007 MI0017874  
GGUAAACCUUGGUGACUAAUJAGAGUCUGGCUGAUUAGGUUUGACACAGAGCUAAAUCAUAUGAA  
CCAAACUCUAAUUAGUCAAAUAAUUCUGUU  
>hsa-mir-5008 MI0017876  
GGGCUGACCCCUAGGGUCAGGUGAGGCCUUGGGGCACAGUGGUGCCAUCUCCCCUGUGCUCCA  
GGGCCUCGCCUGUCCUUGAGGUCGGCC  
>hsa-mir-5009 MI0017877  
GACCAGAAGUGUUUUGGAUUUUGGACUUUUUCAGAUUUGGGGAUAAUUGCAUUAUACUUAUCCUA  
AAUCUGAAAGUCCAAAACCUGAAAUGACCAAUAAG  
>hsa-mir-5010 MI0017878  
GAUCCAGGGAACCCUAGAGCAGGGGGAUGGCAGAGCAAAAUUCUAGGCCUACAGCUGCCUCUUGC  
CAAACUGCACUGGAUUUUGUGUCUCCAUUCCCCAGAGCUGUCUGAGGUGCUUUG  
>hsa-mir-5011 MI0017879  
AGAUGGUUJAGUGGAUGCUGUUAUUAUACAGCCAUGCACUCUGUAGUUUGGUACACAGUGC  
AUGGCUGUAUUAUAACACUAUCCAUUCUUCUUCAGC  
>hsa-mir-5047 MI0017932  
GAAGCGCUUGCCUAGACGAGACACAGUGCAUAAAAACAACUUUUGGGGGACAGGUUAGUUUUUU  
GCAGCUGCGGUUGUAAGGUCUUGGCAAGACAAGCA  
>hsa-mir-5087 MI0017976  
AGCUUUCUACGGGUUUGUAGCUUUGCUGGCAUGUUAAGUGUUGUCCUACAGUCGCAAGCAUAAGA  
AAGAGAAAGUA  
>hsa-mir-5088 MI0017977  
CCCAUCAGGGCUCAGGGAUUGGAUGGAGGUGAUGGGGGCAGGGGAUGGGUCUCACCCUCCCUUCU  
UCCUGGGCCUCAG  
>hsa-mir-5089 MI0017978  
AAGGACUUCAGUGGGAUUUCUGAGUAGCAUCCUUGGAAUCUGCACUCAAGGGAUGCUCACUGGAA  
AUCCACUGAAGUCCUUUU

---

>hsa-mir-5090 MI0017979  
UCUGAGGUACCCGGGGCAGAUUGGUGUAGGGUGCAAAGCCUGCCCGCCCCUAAGCCUUCUGCCC  
CCAACUCCAGCCUGUCAGGA

>hsa-mir-5091 MI0017980  
GACUGUGGCGACGGAGACGACAAGACUGUGCUGGUCGCGGGUUGUGGGGUUUAGGUCACCGGCAG  
GGGUCUGGAGUCCCUGGAGGUUAGGGCU

>hsa-mir-5092 MI0017981  
AUCCAGAUCAUGCCAAAGCCAGUGGGGACUGGACAACAUGAUGAGCCCAAACCAAUCCACGC  
UGAGCUUGGCAUCUGAUUUGGGA

>hsa-mir-5093 MI0017982  
CCCGCCAGGUCCACAUGCCAGAGUGUCAACGUGACCCAGCCAGCCUCCUUCUGAGCUAGGAGGA  
UUAGGAAAUGAGGCUGGCUAGGAGCACAGCCAGGG

>hsa-mir-5094 MI0017983  
AAAAGAAAAAAUCAGUGAAUGCCUUGAACCUAACACACUGCCUUUAUGUGGUAGGUACAGUGG  
GCUCACUGAAACAUUCAACU

>hsa-mir-5095 MI0018001  
CUGGGAUUACAGGCGUGAACCACCGCGCCGCUAACUUUAAGAAACGUCGGCCCGGGAGCGG  
UGGUCACGCCUGUAAUCCAGC

>hsa-mir-5096 MI0018004  
AGUAGAGGUGGGUUUCACCAUGUUGGUCAGGCUGGUCUCAAAACUCCUGACCUCAGGUGAUCCAU  
CCACC

>hsa-mir-5100 MI0019116  
CCAUGAGGAGCUGGCAGUGGGGAUGGCCUGGGGUAGGAGCGUGGCUUCUGGAGCUAGACCACAUG  
GGUUCAGAUCCCAGCGGUGCCUCUAAUGGCCACAGGACCUUGGGCAGUCAGCU

>hsa-mir-5186 MI0018165  
UCAGCCAGCUUAUGACUUGACCCUCUCACCUGAUUUUCUACCAACCUUCCUCAGCUGAUUUCUUU  
CUGGGGAGAGAUUGGUAGAAAUCAGGUGAGAGGGUCAUGCCAUAAGCUGGCUAAC

>hsa-mir-5187 MI0018166  
GACUAAGGGUGGGAUGAGGGAUUGAAGUGGAGCAGGAAUGCGCUUUUCUCCACUGAAUCCUCUUU  
UCCUCAGGUGG

>hsa-mir-5188 MI0018167  
GGGAGGCAUGGAAAUUUCUCUGGUUUCUAAUGGGUACGAUUAUUGUAAGCAGGAUCCAUUCAUAA  
UCGGACCCAUUAAAACCGGAGAUUUUAAAAGACAGGAAUAGAAUCCCA

>hsa-mir-5189 MI0018168  
GGCCCGCCUUUAGGGGCCUCGCGUCUGGGCACAGGCGGAUGGACAGGCUGGCCUCUGGAUGAC  
CUGCCAACCGUCAGAGCCCAGACCCACGUGGCCUCAGUUGGGGACCAGG

>hsa-mir-5190 MI0018169  
GGUCAUACCCUGGCUCAGCCUUGUCACAUGGUUAAUGUUCACAGCCAGUGACUGAGCUGGAGC  
CAGGGCCACUGCCCC

>hsa-mir-5191 MI0018170  
AGUUGGCCAGGACCCCAAGCCCCAGCACUUCAUUCUUGCUGUCCUCUCCUGGUCUGGGAGGAUA  
GAAGAGAGGAUAGGAAGAAUGAAGUGCUGGGCGCUUAGGGGAUCCUGGCCAACU

>hsa-mir-5192 MI0018171  
UUAGUUCAGCCUCCUGGCUCACCUGGAACCAUUUCUCCUGGGAAGCAUGGUAGCCAGGAGAGUG

GAUUC CAGGUGGUGAGGGCUUGGUACU  
>hsa-mir-5193 MI0018172  
CCUAGGAAAGGCUGCUGGUAACUGGGAUGGGGUUGGGGGGAGGUAAGAAGUCUCUGACUCCUCC  
UCUACCUCAUCCCAGUCCAUCACCUGAAGUGGACCUCUUGGGA  
>hsa-mir-5194 MI0018173  
AUUUUCUUGGGUUAACUUAACUCAGCCCUUCUAGGCCAUUCUUUUCACUCAGGAAUUGGAUAA  
GCUUUUCUGAGGGGUUUGGAAUGGGAUGGCAGGGAGAGUCACCAGACACCAUGAA  
>hsa-mir-5195 MI0018174  
GAGCAAAAACCAGAGAACAACAUGGGAGCGUCCUAACCCCUAAGGCAACUGGAUGGGAGACCUG  
ACCCAUCCAGUUCUCUGAGGGGGCUCUUGUGUGUUCUACAAGGUUGUUA  
>hsa-mir-5196 MI0018175  
UCUGAGGAGACCUGGGCUGUCAGAGGCCAGGGAAGGGGACGAGGGUUGGGGAACAGGUGGUUAGC  
ACUUCAUCCUCGUCUCCUCCAGGUUAGAAGGGCCCCCUCUCUGAAGG  
>hsa-mir-5197 MI0018176  
UAUGGGAUCCACAGACAAUGAGUAUCAUUGGCACAAACUCAUUCUUGAAUUUUUGCCAGUUCAA  
GAAGAGACUGAGUCAUCGAAUGCUCUAAAUGUCACUUCACCUCAUGU  
>hsa-mir-5571 MI0019115  
AUCUGACACAAAUGUGAACCAAGCAAUUCUCAAGGAGCCUCCAGGAAAUUCACUUUAGGAAG  
UCCUAGGAGGCUCCUCUGAGAGUUGC UAAAACAAAACAUUGAGAGUCC  
>hsa-mir-5572 MI0019117  
AGCCAGACAAGAGGGUCAUGGGGAGUCACUGUCAACCCAGAGCAGGCACUGCCCCUGCGACCAGC  
CUGGGGCAUCGGUUGGGGUGCAGGGGUCUGCUGGUGAUGCUUCCAUCUCUUUGCUUUGUCCUGA  
UUGUAGC  
>hsa-mir-5579 MI0019133  
UAUGGUACUCCUUAAGCUAACAGGCCCCUGUCACCAUUAAGCUUAAGGAGUACCAGAUC  
>hsa-mir-5580 MI0019135  
UGCUGGCUCAUUUCAUAUGUGUGCUGAGAAAUUCACACAUAUGAAGUGAGCCAGCAC  
>hsa-mir-5581 MI0019136  
AGCCUUC CAGGAGAAAUGGAGACCCUAUACAUACCUGUUCCAUGCCUCCUAGAAGUUC  
>hsa-mir-5582 MI0019138  
UAGGCACACUUAAGUUUAUAGCUACAUCAGUUUAUAACUAUAUCAGUUAAAACUUUAAGUGGCCU  
AGG  
>hsa-mir-5583-1 MI0019139  
AAACUAAUAUACCCAUUAUUCUGGCUAGGUGAUCAUCAGAAUAUGGGUAUAUUAGUUUGG  
>hsa-mir-5584 MI0019141  
CAGGGAAAUGGGAAGAACUAGAUUUGAAUCCAGACCUUUAAGUUCUCCCUUUGCCCAAUU  
>hsa-mir-5585 MI0019142  
UGAAGUACCAGCUACUCGAGAGGUCAGAGGAUUGCUCCUGAAUAGCUGGGACUACAGGU  
>hsa-mir-5586 MI0019143  
UAUCCAGCUUGUUACUAUAUGCUUUUUAAAUGGGGCACAGAGUGACAAGCUGGUUAAAAG  
>hsa-mir-5587 MI0019144  
AUGGUCACCUCGGGACUCAGCCCUGUGCUGAGCCCCGGGCAGUGUGAUCAUC  
>hsa-mir-5588 MI0019147  
ACUGGCAUUAUGGGACUUUUUUUUUUUUUUUUUUUUUAUGUAAAAGUCCACUAAUGCCAGC

---

>hsa-mir-5589 MI0019148  
GGCUGGGUGCUCUUGUGCAGUGAGCAACCUACACAACUGCACAUGGCAACCUAGCUCCCA

>hsa-mir-5590 MI0019150  
UUGCCAUACAUAAGACUUUAUUGUGUUGAUCAACAAUAAAGUUCAUGUAUGGCAA

>hsa-mir-5591 MI0019151  
UGGGAGCUAAGCUAUGGGUAUACUGAGCUUAUGUAUGCAUCUGCAUACCCAUAGCUUAGCUCCCA

>hsa-mir-5680 MI0019280  
GCAUUGGGUUAGCAGGUUAGCCCAGCAUUUCCCUUCCUGGACACACAGGAGGAGAAAUGCUGGAC  
UAAUCUGCUAAUCCAAUGC

>hsa-mir-5681a MI0019281  
AGUUUUUGAAGAGUAUUGCCACCCUUUCUAGUCCCUAUUAGACUAGAAAGGGUGGCAAUACCUCU  
UCCAAAAACU

>hsa-mir-5682 MI0019282  
GGCCCAUGGGUCUUAUCCUGCAAGGUGCUGCAGAGACGAGGCCUGUAGCACCUUGCAGGAUAAGG  
UCUACUGGGCC

>hsa-mir-5683 MI0019284  
GGAGCUUGUUACAGAUGCAGAUUCUCUGACUUCUACUGCACCAGUGAAGUCAGGAUCUGCAUUU  
GAAUAAGACCC

>hsa-mir-5684 MI0019285  
GCUGAACUCUAGCCUGAGCAACAGAGUGAGAUGGUCUUGUUUUGUUGCCAGGCUGGAGUCCAGU

>hsa-mir-5685 MI0019287  
CUCUACAUCACAGCCCAGCAGUUUACACGGGCCCUCCCCUCAUUGGGCCCGUGAUAAUCGCAGG  
GCUGUGAUGUAGAG

>hsa-mir-5687 MI0019291  
CCUCACUUAUCUGACUCUGAAAUCUUCUAAAUGGUACCCACUUUAUUUAGAACGUUUUAGGGUCA  
AAUAAGUACAGG

>hsa-mir-5688 MI0019292  
GAAACACUUUGCCUUUUUACAGGAGUUUAUUAUGUUUUGGACAUAGAAACAUAACAAAACACCUGU  
AAAACAGCAAAGUGUUUC

>hsa-mir-5689 MI0019294  
AGCGUGGUAGCAUACACCUGUAGUCCUAGAUACUCAGGAGGGUGAGUAUCUAGGACUACAGGUGU  
GUGCUACCACGCU

>hsa-mir-5690 MI0019295  
CUUUUAAUUUCAGCUACUACCUCUAUUAGGAUUUGGGAGUUUAUACUAAUAGAGGUAAUAGUUGAA  
AUUAAGAG

>hsa-mir-5691 MI0019296  
GGACAAGCUUGCUCUGAGCUCGAGAAAGCUGACAGACAGCUGCUUGGUGUUCAGAGCUUGUCUG  
UCC

>hsa-mir-5692a-2 MI0019298  
UACAAAUAUACCACAGUGGGUGUACCUCAUGUGUGUACACCCUGUGAUUUUUUUGUA

>hsa-mir-5692b MI0019311  
GAUAUUUAUGAAUAAUAUCACAGUAGGUGUUCACACAUAUUGUGUACACCAUGUGUGUACACCCA  
GUGAUUUUGAAGUAGUAUGUC

>hsa-mir-5692c-1 MI0019288

UAUAACAUGUAUAUACCCACUGUGAUUAUUAAGAGUAAUAGCUCUCUAGGUUAUUAUGAAUAAUA  
UCACAGUAGGUGUACACAAUGUUGUA  
>hsa-mir-5693 MI0019300  
CUGGGAAGUUAGUUCAUUUCAGUCUGUGCUGUGAGCUAGCCAGCAGUGGCUCUGAAAUGAACUCA  
AACUCUAG  
>hsa-mir-5694 MI0019301  
GCCAACUGCAGAUCAUGGGACUGUCUCAGCCCCAUUGUAUCUGAAGGCUGAGAAGUCCCAUGAU  
CCGCACUUGGC  
>hsa-mir-5695 MI0019302  
CAAGGCCUAUCUAUCUAGAUUCUUCUUGGCCUCUCUGAGCAUGCAUUCUGAGACUCCAAGAAGA  
AUCUAGACAGAUAGGCCUUG  
>hsa-mir-5696 MI0019303  
GUGUCAUUUAAAGUAGUCUGAUGCCUACUACUGAUGACAUAACAUGUAAGUGCUCAUUUAGGCGU  
CAGACUACCUAAAUGAGCAC  
>hsa-mir-5697 MI0019304  
AGCAUAUUCUCAAGUAGUUUCAUGAUAAAGGGUGUAUGAGAGAUAACCCUUUAUCAUGAAACGC  
UUGAGGAUACGCU  
>hsa-mir-5698 MI0019305  
CUGUGCACCUGGGGGAGUGCAGUGAUUGUGGAAUGCAAAGUCCACAAUCACUGUACUCCCCAGG  
UGCACAG  
>hsa-mir-5699 MI0019306  
CUGUACCCCUGCCCCAACAAGGAAGGACAAGAGGUGUGAGCCACACACACGCCUGGCCUCCUGUC  
UUUCCUUGUUGGAGCAGGGAUGUAG  
>hsa-mir-5700 MI0019307  
UUAUUAAUGCAUUAAAUUAUUGAAGGCCUUGGGCACCCCAGGCCUUCAAUAAUUUAUGCAUU  
UAUUGA  
>hsa-mir-5701-1 MI0019308  
GAUUGGACUUUAUUGUCACGUUCUGAUUGGUUAGCCUAAGACUUGUUCUGAUCCAUCAGAACA  
GAAAAUAACGUCCAUC  
>hsa-mir-5702 MI0019309  
GCCUCAACUCCUGGGAUAUGUUGCUGAUCCAACCUGAAAUCUUCUGUAGGUUGAGUCAGCAACA  
UAUCCCAUGACUUUUGGGU  
>hsa-mir-5703 MI0019310  
UUGCCGUCCCCUCCUCGUCUUUCCCCUCAGGAGAAGUCGGGAAGGUGGCGGCGG  
>hsa-mir-5704 MI0019312  
UGAUCUUGUUUAGGCCAUCAUCCCAUUAUGCUAAGUCCAUGGGCAAACAUAACAGGAUGAUGGCC  
UAAACAAGACCA  
>hsa-mir-5705 MI0019313  
UCCCCAUUUACACAGGCCAUGAGCCCCGAAACACCCAUCCAGGAUUGCUGAUGGGUGUUUCGGG  
GCUCAUGGCCUGUGUAAAUGGGGA  
>hsa-mir-5706 MI0019314  
AGCUAGGUCUUCUGGAUAACAUGCUGAAGCUUCUACGUCAUUCAGCACUUGCUUCAGCAUGUUUU  
CCAGAGGAUCUAGCU  
>hsa-mir-5707 MI0019315

UGUAAGAACACGUUUGAAUGCUGUACAAGGCACAUAUGUGAACAUUGUACCACAUGUACAGCUUU  
CAAACAUGCUCUUUAUA  
>hsa-mir-5708 MI0019316  
AUUACAGACAUGAGCGACUGUGCCUGACCAAAAGUCAACAUAACAACAACAUCUUGGCCAGGCA  
CAGUGGCUCAUGCCUGUAAU  
>hsa-mir-5739 MI0019412  
GGUUGGCUAUAACUAUCAUUUCCAAGGUUGUGCUUUUAGGAAAUGUUGGCUGUCCUGCGGAGAGA  
GAAUGGGGAGCCAGG  
>hsa-mir-6068 MI0020345  
CCUGCGAGUCUCCGGCGGUGGCUUGUGGCUGAGUGUCACGCUGCUGGGCGCAGGCUCGGCC  
>hsa-mir-6069 MI0020346  
UGGUGACCCUUGGGCUAGGGCCUGCUGCCCCUGCCCAGUGCAGGAGGGUGGAGGGUCACUCCUU  
AGGUGGUCCCAGUG  
>hsa-mir-6070 MI0020347  
GGGUCACUUCUAGCCUCUCCGGUUCAGUCCUGGAGCUCUGUGCCUUUGGGUCCUGGUGAGCUC  
UUGUUGAUUGCAGUGGGAGAUUGGGAGAAUUGCCUUA  
>hsa-mir-6071 MI0020348  
GUUUCUGCUGCCGGCCAAGGCUCUGGGUCCGGCUUACUCCCUAGCUUACUGUCCUCAGAACCCCC  
GCCACCACAGAAG  
>hsa-mir-6072 MI0020349  
GGGUGGGGGCUGGUGCAGGGAUGGGCUUUGCUACUGCUCUCCAUACACACUGCACCUCUAGCUGCUG  
CCUGGA  
>hsa-mir-6073 MI0020350  
UAGAUGUUGGUCCAAACUGAAAGUUGAUGAGUCACUGUGCCUCUCGGGGUAGUGAGUUAUCAGCU  
ACAGUGAGAGAGCAGUGUUUGGCC  
>hsa-mir-6074 MI0020351  
UACCAACCCCAUGGAAUUUUUACUCACCUUCAGUCAACUGAUUUGCUCUUUGGUGGAGAUUAUCA  
GAGGCUAGGUGGAGAUAGAGGUAGCCUUGAGGGUGGGUGUGG  
>hsa-mir-6075 MI0020352  
GACACCACAUGCUCUCCAGGCCUGCCUGCCUCCAGGUCAUGUCCAGUGUCCACAGAUGCAG  
CACCACGGCCCAGGCGGCAUUGGUGUCACC  
>hsa-mir-6076 MI0020353  
AGCAUGACAGAGGAGAGGUGGAGGUAGGCGAGAGUAAUAUAAUUUCUCCAGGAGAAUCAUCUGAGA  
GGGGAAGUUGCUUUCUGCCUGGCCUUUCACCCUCCUGAGUUUGGG  
>hsa-mir-6077-1 MI0020354  
CCUGCGUAGAAAGGGAAGAGCUGUACGGCCUUCGCGCUAGUUUGUUGUGUUAAGGCUGACGCUC  
CCUAUUUCUCCUCAGUG  
>hsa-mir-6078 MI0020355  
GCAGAGGAGAAAGAGCCACCGCCUGAGCUAGCUGUGGACAGAGGCAAACUCUAACUUCAGCUGG  
UUUUGAGUGAGAAGUGGGUCUCUGUUAAAAUGCUA  
>hsa-mir-6079 MI0020356  
UCCUAGACCUAGUAUCAGUGGCCAAAGAAACUUUUUGGAAGCUUGGACCAACUAGCUGGCU  
>hsa-mir-6080 MI0020357  
GCCUGCGGCUCUGGGAAUGCCGGUCUGGGGCUGGUUGUCUAGUGCGGGCGUUCCCGUUCGCGGGG

A

>hsa-mir-6081 MI0020358  
CCACCACGGUGCUGGCACCAGGGCCUCUGCCCCGUAGGACACCGAGGCCUUAUGAAUAGGAGCAGU  
GCCGGCCAAGGCGCCGGCACCAUCUUGGUGAU

>hsa-mir-6082 MI0020359  
UUGAAGAAUACGUCUGGUUGAUCCAGUCCACUUAUUCUGAGAAAGUCCACAGACUGGAUCGGGU  
CUUGGAUUUUAGCUGGAUUCUUGACUGGGCUAUUUUUGUCAUA

>hsa-mir-6083 MI0020360  
GUAAAAAGAGUCCAGAGUCUGGGAAGGUGGAAAGGGAGCAGGAGCAUCGUCUUUAAGAGGGUCAG  
GUACCUUUGCUCUUAUAUCAGAGGCUGUGGGCUUCCUACAG

>hsa-mir-6084 MI0020361  
AGCGUCCAGGCUGGGCCGCAGGACCGGGCGCGGAGCCUCGCAGGGUCGGGCUCGGGCUCCCUAAC  
CGUCUCCGCUCUUCUCCGCCAGUCGGUGGGCCGGGCUGGGCGGCGCGG

>hsa-mir-6085 MI0020362  
GUCUACCAGGUGUGGGCCAGCUUACAUAGUUCUUGCUGAGGCCGGGAUUUCAUGCAGAAAACU  
GGUUGCAAAGGUGCUGAAGGGGCUGGGGGAGCACAAGGGAGAAG

>hsa-mir-6086 MI0020363  
AGGAGGUUGGGAAGGGCAGAGAUGAGCAUAAAGUUUUUGCCUUGUUUUUCUUUUU

>hsa-mir-6087 MI0020364  
GGUGAGGCGGGGGGGCGAGCCCUGAGGGGCUCUCGCUUCUGGGCGCCAAG

>hsa-mir-6088 MI0020365  
AGAGAUGAAGCGGGGGGGCGGGUCUUGCUCUAUUGCCUACGCUGAUCUCA

>hsa-mir-6089-1 MI0020366  
CCCCGGGCCCGGCGUUCUCCUCCUUCUCCGUGCGCCAGUGGAGGCCGGGGUGGGGGCGGGGCGGGG

>hsa-mir-6090 MI0020367  
CGCUGGGUCCGCGCGCCCUGGGCCGGGCGAUGUCCGCUUGGGGGAGCGAGGGGCGGGGCG

>hsa-mir-6124 MI0021258  
GGGGAGGUAGGAAAAGGAAGGGGGAGGAGAAGGUGAGACCAAUGUCCUGGGUGCCACUCCUGCC  
CAGUGCCUCCUUCUUCGUU

>hsa-mir-6125 MI0021259  
GCUCUGGGGCGUGCCGCCCGGUCGUGCCACCUCUCCUACCGCUAGUGGAAGAAGAUGGCGGAA  
GGCGGAGCGGCGGAUCUGGACACCCAGCGGU

>hsa-mir-6126 MI0021260  
AGCCUGUGGGAAGAGAAGAGCAGGGCAGGGUGAAGGCCCGGCGGAGACACUCUGCCCACCCAC  
ACCCUGCCUAUGGGCCACACAGCU

>hsa-mir-6127 MI0021271  
ACUUUCUCCAUCUACCAAGAUGAGGGAGUGGGUGGGAGGUGGGAAGGCUGCCCCAAAUGGCCUCU  
AAAUCCUUCUCCAGUCUCCUCCUCCUCCUCCUCCUUCUUCUUCU

>hsa-mir-6128 MI0021272  
AAGAAGCUUGUAGAUUUUUCUCCUUAUCUAUCUAGAAUUAUAGGACUUCAGUCCAUGAUUUGGAA  
AAAUAUCUGGAAUUGGAGUCAAAAAUAAUUUGAAAAUAGGAAU

>hsa-mir-6129 MI0021274  
GUUCCUUCUAAGGAUUCAGUGAGGGAGUUGGGUGUAUAGGAAGGAAAUCUUAUUGUCCAAGUUU  
CCCUUUGAAACCUCUUAAGAAUGGAAUAAAACUGCCCAAUCAUA



---

>hsa-mir-6130 MI0021275  
CAAUGAAUGUGGAAAUGCAGGCAUCCCUUCUAUAUACUGAUGUAAUUUUCCUUGGAUUUAUAUGC  
AGUACUGAGGGAGUGGAUUGUAUGGUAGUUCUAUUUUUACAUUU

>hsa-mir-6131 MI0021276  
UCCCGCAUCCCUCUGCUUUGGUCAGGUGGGUCCCUCUCCAUGGGUAGAGCCAGAGAUGGUGG  
GUUCUGGCUGGUCAGAUGGGAGUGGACAGAGACCCGGGGUCCUC

>hsa-mir-6132 MI0021277  
UGCUAUUGUCUUACUGCUACAGCAGGGCUGGGGAUUGCAGUAUCCGCUGUUGCUGCUGCUGCCCAG  
UCCUGCCCCUGCUGCUACCUAGUCCAGCCUCACCGCAUCCAGA

>hsa-mir-6133 MI0021278  
GGAAUGUCACCUGUGUGUUUCUCUGCAUGCCCUCUUAUUGUUCUGCUGAAGACUGGUCUCUUC  
AUGUGUGAGGGAGGAGGUUGGGUAUUGAGGGAAAACAGGGGGC

>hsa-mir-6134 MI0021279  
UGGGCCUUGAUGUCAGUAGGGCUCAGUAGGGAACUGACCCUCUAUUUCCACCUGCAUAAAUGAAG  
CUGAAUGAGGUGGUAGGAUGUAGAGCUGGUUGACACUCUGCUUU

>hsa-mir-6165 MI0021472  
CAGCAGGUCAGCAGGAGGUGAGGGGAGAGGAUCCACCUGUCCUGUCCUGUCCUCUCCUGCCCUGU  
CCUGGCUCCAGCCCCUCCC

>hsa-mir-6499 MI0022209  
UCAGUCGGGCGCAAGAGCACUGCAGUUCUGUUGGGUGACAGCAGUGUUUGUUUUGCCCACAG

>hsa-mir-6500 MI0022211  
CCUGCCUGCAGAAAGGAGCUAUCCACUCCAGGUGUCCUUUCUUCUGAGAGCUGGACACUUGUUGG  
GAUGACCUGCCUGCAGGUAGG

>hsa-mir-6501 MI0022213  
GGAGUUGCCAGGGCUGCCUUUGGUGACAGCAGCAGUAGAGUUGCCAGAGCAGCCUGCGGUAACAG  
UA

>hsa-mir-6502 MI0022214  
CAGAGUGGGAGCUCUAGAAAGAUUGUUGACCAAUCAUCUUAUUGACUAGACCAUCUUCUAGAGU  
AUAACUAUUUU

>hsa-mir-6503 MI0022215  
AAUGGUCCCCCAGGGAGGUCUGCAUUCAAAUCCCCAGAAGCUGAGGAUUAGGGGACUAGGAUGC  
AGACCUCCCUGGGGGACCAUU

>hsa-mir-6504 MI0022216  
GCAGUCUGGCUGUGCUGUAAUGCAGUCUGCACCCUGCUGCAUACAGCACAGCCAUUCUCU

>hsa-mir-6505 MI0022217  
GCAUUGGAAUAGGGGAUAUCUCAGCAUGUUGAGCCCUGUCUCUGGGGAGCUGACUUCUACCUCUU  
CCAAAG

>hsa-mir-6506 MI0022218  
GACUGGGAUGUCACUGAAUAUGGUGUUUGUGAGUUGAUUGACAUCGUAUCAGAGAUCCAGACAC  
A

>hsa-mir-6507 MI0022219  
GGAGGGAAGAAUAGGAGGGACUUUGUAUUGUGGUUCAGUACCAUGCAAAGUCCUCCUAUUUUUC  
CCUCC

>hsa-mir-6508 MI0022220

UUCCUCUAGAAAUGCAUGACCCACCCUGAGUUUUGGUGGGCCAUGCAUUUCUAGAACUCC  
>hsa-mir-6509 MI0022221  
UUUUUGUGUGUGAAAUUAGGUAGUGGCAGUGGAACACUAUAUUAUUCAGGUUCCACUGCCACUA  
CCUAAUUCUCAGAUGGAAA  
>hsa-mir-6510 MI0022222  
AGCAGCAGGGGAGAGAGAGGAGUCCUCUAGACACCGACUCUGUCUCCUGCAGAU  
>hsa-mir-6511b-1 MI0022552  
GGGACGGGGCCUGCAGGCAGAAGUGGGGCUGACAGGGCAGAGGGUUGCGCCCCUCACCACCCCU  
UCUGCCUGCAGCGGUGGGCU  
>hsa-mir-6512 MI0022224  
UAUGCUCUUACCAUUAGAAGAGCUGGAAGAAGGCUGAGGGAGAUGCCUUCUCCAGCCUUCUAA  
UGGUAGGAGCAU  
>hsa-mir-6513 MI0022225  
GCUUUGGAUUGACGCCACAUGUCUCAGGUCCCCAGCUGAGUCAAGUGUCAUCUGUCCCUAGGC  
>hsa-mir-6514 MI0022226  
UAUGGAGUGGACUUUCAGCUGGCAUUUACGAGUCAGAGUUCUACAGAGCUGCCUGUUCUCCAC  
UCCAG  
>hsa-mir-6515 MI0022227  
CAUUGGAGGGUGUGGAAGACAUCUGGGCCAACUCUGAUCUCUUAUCUACCCCCCAG  
>hsa-mir-6516 MI0025513  
UGGGUUUUGAAUUUGCAGUAAACAGGUGUGAGCAUUCUAGCAGCAGUUUGAUGAUGAUGAUA  
CUGCAAACAGGACCUA  
>hsa-mir-6715a MI0022548  
UGGGCUGCGUCCACAGGCACAGCCGGUUUGAGCAUUUUUACUGAAUUGCCAAACCAGUCGUGCCU  
GUGGGCACAACCUU  
>hsa-mir-6715b MI0022549  
GGUUGUGCCACAGGCACGACUGGUUUGGCAAUUCAGUAAAAAUGCUCAAACCGGCUGUGCCUGU  
GGACGCAGCCCA  
>hsa-mir-6716 MI0022550  
GAGAGGCCAAGACCUUGGGAAUGGGGUAAGGGCCUUCUGAGCCCAGGUCCGAACUCUCCAUUC  
UCUGCAGAGCGCUCU  
>hsa-mir-6717 MI0022551  
CUGGUGUUUGAGGCGAUGUGGGGAUGUAGAGACAACUCCCAGUCUCAUUUCCUCAUCCUGCCAG  
GCCACCAU  
>hsa-mir-6718 MI0022553  
AGUGAAUCCCUAGUGGUCAGAGGGCUUAUGAUUAUUGUGAGAGCCAUGUCAUAAGCCUUUUGGC  
CACUAGGGAUUCAAU  
>hsa-mir-6719 MI0022554  
GCCCUACUCUCAGGAGGAGGCUGAUGUCUUCAGAGCAGGGUUUGGUCUGUGCUUCUCUGACAUCA  
GUGAUUCUCCUGCUGCUUUUAU  
>hsa-mir-6720 MI0022555  
UUGAGCGAGAGAUUGUGGCGCACCGAGUUCUUCAGCCUUGGUAGGCGCCGCGGAAGAAGGGGAA  
GCGCGCCUGCAGGAACUGGUAGAUCUCGCUGAG  
>hsa-mir-6721 MI0022556

CCCUCAUCUCUGGGCAGGGGCUUAUUGUAGGAGUCUCUGAAGAGAGCUGUGGACUGACCUGCUUU  
AACCCUUCUCCAGGUUCCCAU  
>hsa-mir-6722 MI0022557  
GGCCUCAGGCAGGCGCACCCGACCACAUGCAUGGCUGGUGGCGGCGUGCAGGGGUCGGGUGGGCC  
AGGCUGUGGGGCG  
>hsa-mir-6723 MI0022558  
AUGCAUCGGGAUAGUCCGAGUAACGUCGGGGCAUUCGGAUAGGCCGAGAAAGUGUUGGGGAAG  
AAAGUUAGAUIUACGCCGAUGAAU  
>hsa-mir-6724 MI0022559  
CGCUCGCGUUCUGGGCCCCGCGGGCGGGCUGGGGGCUGCCCCGGGCCGGUCGACCAGCGCGCCGUAGC  
UCCCGAGGCCCGAGCCGCGACCCGCGG  
>hsa-mir-6726 MI0022571  
GGGGGCGGGAGCUGGGGUCUGCAGGUUCGCACUGAUGCCUGCUCGCCUGUCUCCCCGCUAG  
>hsa-mir-6727 MI0022572  
GGGUGCUCGGGGCAGGCGGCUGGGAGCGGCCUCACAUUGAUGGCUCUCCUGCCACCUCUCCGCAG  
>hsa-mir-6728 MI0022573  
CUAGAUUGGAUGGUAGGACCAGAGGGGCUUACUGCCUGUGGGGCUCUCUGGACCCAGUGCCAU  
GCUUCUCUGCUCUGCUCUCCCCAG  
>hsa-mir-6729 MI0022574  
GAGGGUGGGCGAGGGCGGCUGAGCGGUCCAUCCCCGGCCUGCUCAUCCCCUCGCCUCUCAG  
>hsa-mir-6730 MI0022575  
CCGAAAGAAAGGUGGAGGGGUUGUCAGAGCUGCGGCUCUCCACCCUGACACCCCAUCUGCCCUC  
AG  
>hsa-mir-6731 MI0022576  
ACAGGUGGGAGAGCAGGGUAUUGUGGAAGCUCAGGUGCCAACCACCUGCCUCUAUCCCCACUC  
UCCCCAG  
>hsa-mir-6732 MI0022577  
AGGCCUAGGGGUGGCAGGCUGGCCAUAGUGUGGGCUAACCUGUCCUCUCCCCUCCAG  
>hsa-mir-6733 MI0022578  
GUGCUUGGGAAAGACAAACUCAGAGUUCUUCUUGUGAGCUCAGUGUCUGGAUUUCCUAG  
>hsa-mir-6734 MI0022579  
AGAACUUGAGGGGAGAAUGAGGUGGAGAAGCCAGGUUCUGAAUCCCCUCCUCACUCUUCUCU  
CAG  
>hsa-mir-6735 MI0022580  
GCAGCCAGGGCAGAGGGCACAGGAAUCUGAGGUGACUGGCACAGAAGACUCAGGCCUGUGGCUC  
UCCUCAG  
>hsa-mir-6736 MI0022581  
CUGAGCUGGGUGAGGGCAUCUGUGGUUUGCUGGCUGCCUCAGCUCUCCUCUACCCACAG  
>hsa-mir-6737 MI0022582  
UUGGGUUGGGGUGGUCGGCCUGGAGGGGUUUGUUUGCUUAUCCCCUCUGUGCUACCCCUA  
CCCAG  
>hsa-mir-6738 MI0022583  
GAAGGCGAGGGUAGAAGAGCACAGGGGUUCUGAUAAACCUCUGCCUGCAUUCUACUCCAG  
>hsa-mir-6739 MI0022584

GAAUGUGGGAAAGAGAAAGAACAAGUAAAAGGAAUUUUCAUUUUCCAGCCCCUAAUUGUUCUGUC  
UUUCUCCAG

>hsa-mir-6740 MI0022585

GAAAGAGUUUGGGAUGGAGAGAGGAGAAACUUGAGGUCUCUGGGAGUUGCUUAAACCAGUUGACC  
GUAACCUGGCCAGAGAAUUCUGAUAGUGUCUUCUCUCCUCCCAAACAG

>hsa-mir-6741 MI0022586

AAUGGGUGGGUGCUGGUGGGAGCCGUGCCUGGCCACUCAUUCGGCUCUCUCCUCACCCUAG

>hsa-mir-6742 MI0022587

GAGGGAGUGGGUGGGACCCAGCUGUUGGCCAUGGGCGACAACACCUGGGUUGUCCCUUAG

>hsa-mir-6743 MI0022588

GGGUAAAAGGGCAGGGACGGGUGGCCCCAGGAAGAAGGGCCUGGUGGAGCCGCUCUUCUCCUUGC  
CCACAG

>hsa-mir-6744 MI0022589

UCACGUGGAUGACAGUGGAGGCCUCCUGGAUCUCUAGGUCUCAGGGCCUCUCUUGUCAUCCUGCA  
G

>hsa-mir-6745 MI0022590

GGUCCUUGAGGGCAGGAGCUGGGUCUUGGGACUGAUUGCCCUAGUGGCUAGCCCUGGGUCUAGC  
AGCCUAUGGCAGUGUCUGUAAAACACUGGUGGAGUCCUGGGUGGAAGAAGGUCUGGUUCUCA

>hsa-mir-6746 MI0022591

CUUGCCCGGAGAAGGAGGUGGCCUGGAGAGCUGCUGUCUCCAGCCGCCGCUUCUCCACAG

>hsa-mir-6747 MI0022592

UUUGGAGGGGUGUGGAAAGAGGCAGAACAUUCGUUCACUUUCCUGCCUCCUCUGCACCAG

>hsa-mir-6748 MI0022593

UGGUGUGUGGGUGGGAAGGACUGGAUUUGAAAUGGUCCCACUCCUGACGAUCCUGUCCUUGUCUC  
CUACAG

>hsa-mir-6749 MI0022594

GGCCUCGCGGCCUGGGUUGGGGAGCUCUGUCCUGUCUCACUCAUUGCUCUCCUCCCUGCCUGGC  
CCAG

>hsa-mir-6750 MI0022595

GCUGUCAGGGAACAGCUGGGUGAGCUGCUGCCCCAGAGGCCAGCAGGUGUCCAGAACUCACCCU  
CUGCUCUCCAG

>hsa-mir-6751 MI0022596

UCUUCUUGGGGUGAGGUUGGUGUCUGGCCCCAGCAGCCAGACUGAGCCUCUCUCUCCAG

>hsa-mir-6752 MI0022597

AUGGAGGGGGGUGUGGAGCCAGGGGGCCAGGUCUACAGCUUCUCCCGCUCUCCUCCUCCAUAC  
UCCAG

>hsa-mir-6753 MI0022598

CACCAGGGCAGAGCAGGGCUGAUCAUCUCACGUCAGAGAGGGGAAGGGCUGCCAGUGAGCC  
CCCACAGGGCUCUACAUCUCCAGCUGGGCCUGGCUGGAGAUCCAGGGUCCUGAAGGCCCCCGC  
CACCGUUCUGGUCUGUCUCUGCCCUGGCACCCAG

>hsa-mir-6754 MI0022599

GGCUGCCAGGGAGGCUGGUUUGGAGGAGUCUGGUGGCCUGUUCUCUUCACCUGCCUCUGCCUGCA  
G

>hsa-mir-6755 MI0022600

UGUUUUAGGGUAGACACUGACAACGUUAUGUGUGGUCUUUAACCUGUUGUCAUGUUUUUCCCUA  
G

>hsa-mir-6756 MI0022601

ACCCUAGGGUGGGGCUGGAGGUGGGGCUGAGGCUGAGUCUCCUCCCUUCCUCCUGCCCAG

>hsa-mir-6757 MI0022602

GGGCUUAGGGAUGGGAGGCCAGGAUGAAGAUUAAUCCCUAAUCCCAACACUGGCCUUGCUAUCC  
CCAG

>hsa-mir-6758 MI0022603

UGGGCUAGAGAGGGGAAGGAUGUGAUGUGAGCAGAUGGUUCUCACUCAUUCUCCUCUGUCCAG

>hsa-mir-6759 MI0022604

UAUUGUUGUGGGUGGGCAGAAGUCUGUUUUCUUAUGGUUUUCUGACCUUUGCCUCUCCCUUCAG

>hsa-mir-6760 MI0022605

CAGUGCAGGGAGAAGGUGGAAGUGCAGAGUGGGCUCACCUCUCGCCACACUGUCCCUUCUCCC  
CAG

>hsa-mir-6761 MI0022606

UCUGCUCUGAGAGAGCUCGAUGGCAGGUGCCUCCGUGUUGCCGAACCCUCCUACGCUGCUCUCUC  
ACUCCAG

>hsa-mir-6762 MI0022607

AGAGCCGGGGCCAUGGAGCAGCCUGUGUAGACGGGGACCUGCCUGCAUGGGCACCCCUACUG  
GCUGCUUCCCUUGGUCUCCAG

>hsa-mir-6763 MI0022608

UUCUCCUGGGGAGUGGCUGGGGAGCAGACAGACCCCAACCUCAUGCUCUCCCGGCCUCUGCCCCAG

>hsa-mir-6764 MI0022609

CUGACUCCAGGGUCUGGUCAGAGUUGCUGAGUGGGUUGAUCUCUGGUCUUUCCUUGACAG

>hsa-mir-6765 MI0022610

GUGAGGCGGGGCCAGGAGGGUGUGGGCGUGGGUGCUCGGGGCCGUCAGGGUGCCUGCGGGACG  
CUCACCUGGCUGGCCCGCCCAG

>hsa-mir-6766 MI0022611

AUGAGCGGGUGGGAGCAGAUCUUAUUGAGAGUUCUUCUCCUGCUCUCCUGAUUGUCUCCCCACC  
CUCACAG

>hsa-mir-6767 MI0022612

UGAAAUCGCAGACAGGGACACAUGGAGAACGCCCCACCAGUCCCACGUGCUUCUCUUUCCGCA  
G

>hsa-mir-6768 MI0022613

CCAGGCACACAGGAAAAGCGGGGCCUGGGUUCGGCUGCUACCCCAAAGGCCACAUUCUCCUGUG  
CACACAG

>hsa-mir-6769a MI0022614

AGGCCAGGUGGGUAUGGAGGAGCCUCAUAUGGCAGUUGGCGAGGGCCAGUGAGCCCCUCUCUG  
CUCUCCAG

>hsa-mir-6769b MI0022706

CUUCCUGGUGGGUGGGGAGGAGAAGUGCCGUCCUCAUGAGCCCCUCUCUGUCCACCCAUAG

>hsa-mir-6770-1 MI0022615

UAUCCUGAGAAGGCACAGCUUGCACGUGACCUCUGGGCCUGGCGGCUGUGUCUUCACAG

>hsa-mir-6771 MI0022616

GGUGCCUCGGGAGGGCAUGGGCCAGGCCACAUAUAUGAGCCAAACCCUGUCUACCCGCAG  
>hsa-mir-6772 MI0022617  
AGGCCUGGGUGUAGGCUGGAGCUGAGGACUGAGGCUCACCUUGCUCUGACUCUGUGCCCACAG  
>hsa-mir-6773 MI0022618  
GGGAGUUGGGCCAGGAGUAAACAGGAUUAGUGCUUAUGCUAAGAUGUCUUCACUGUCACUUCUC  
UGCCCAUAG  
>hsa-mir-6774 MI0022619  
UGUGCACUUGGGCAGGAGGGACCCUGUAUGUCUCCCCGCAGCACCGUCAUCGUGUCCUCUUGUC  
CACAG  
>hsa-mir-6775 MI0022620  
GAACCUCGGGGCAUGGGGGAGGGAGGCUGGACAGGAGAGGGCUCACCCAGGCCUCUGCCUCUGCC  
CCAG  
>hsa-mir-6776 MI0022621  
CGGGCUCUGGGUGCAGUGGGGUUCCCACGCCGCGCAACCACCACUGUCUCUCCCCAG  
>hsa-mir-6777 MI0022622  
UCAAGACGGGGAGUCAGGCAGUGGUGGAGAUGGAGAGCCUGAGCCUCCACUCUCCUGGCCCCCA  
G  
>hsa-mir-6778 MI0022623  
GUUCAAGUGGGAGGACAGGAGGCAGGUGUGGUUGGAGGAAGCAGCCUGAACCCUGCCUCCUGACA  
UCCACAG  
>hsa-mir-6779 MI0022624  
GAGCUCUGGGAGGGCUGGGUUUGGCAGGACAGUUUCCAAGCCUGUCUCCUCCCAUCUCCAG  
>hsa-mir-6780a MI0022625  
GACACUUGGGAGGGAAGACAGCUGGAGAGUAUGGUCACAGCAGCAUCCUCCUCUGUUUCUUCUCC  
UAG  
>hsa-mir-6780b MI0022681  
CAGCCUGGGGAAGGCUUGGCAGGGAAGACACAUGAGCAGUGCCUCCACUUCACGCCUCUCCCUUG  
UCUCCUUCUCCUAG  
>hsa-mir-6781 MI0022626  
AACCCCGGGCCGGAGGUCAAGGGCGUCGCUUCUCCUAAAUGUUGCCUCUUUUCCACGGCCUCAG  
>hsa-mir-6782 MI0022627  
UGGGGUAGGGGUGGGGAAUUCAGGGGUGUCGAACUCAUGGCUGCCACCUUUGUGUCCCAUCCU  
GCAG  
>hsa-mir-6783 MI0022628  
CCUGUUAGGGGAAAAGUCCUGAUCCGGGAACCCACAGCCCCGUUCCUGGGCUUCUCCUCUGUAG  
>hsa-mir-6784 MI0022629  
UACAGGCCGGGCUUUGGGUGAGGGACCCCCGGAGUCUGUCACGGUCUCACCCCAACUCUGCCCC  
AG  
>hsa-mir-6785 MI0022630  
CUCCCUGGGAGGGCUGGAUGAUGGUGGGAGAGGAGCCCCACUGUGGAAGUCUGACCCCCACAUC  
GCCCCACCUUCCCCAG  
>hsa-mir-6786 MI0022631  
GCCGGGUGGGGCGGGGCGGCCUCAGGAGGGGCCAGCUCUCCUUGGAUGUGCUGCGGUGGGGCGCG  
AGGGGCGUCACGUCACCCAAGUGACGCCCUUCUGAUUCUGCCUCAG

---

>hsa-mir-6787 MI0022632  
UCGGCUGGCGGGGUAGAGCUGGCUGCAGGCCCGGCCCCUCUCAGCUGCUGCCCUCUCCAG

>hsa-mir-6788 MI0022633  
GACGGCUGGGAGAAGAGUGGUGAAGAAGAGUAUUGAUUGUGCUGUUCGCCACUUCCCUCCCUGCA  
G

>hsa-mir-6789 MI0022634  
CGAGGUAGGGGCGUCCCGGGCGCGGGCGGGUCCCAGGCUGGGGCCCCUCGGAGGCCGGGUGCUC  
ACUGCCCCGUGCCGGCGCCCCGUGUCUCCUCCAG

>hsa-mir-6790 MI0022635  
GUGAGUGUGGAUUUGGCGGGGUUCGGGGUUCGACGGCGACCUCGGCGACCCUCACUCACC

>hsa-mir-6791 MI0022636  
CCAGACCCUGGGGCUGGGCAGGCGAAAGAGGUCUGAACUGCCUCUGCCUCCUUGGUCUCCGGC  
AG

>hsa-mir-6792 MI0022637  
GUAAGCAGGGGCUCUGGGUGAUGUGAGGAGCAACAGGCACCCUCCUCCACAGCCCCUGCUCAUUC  
CU

>hsa-mir-6793 MI0022638  
GUCACUGUGGGUUCUGGGUUGGGGUGAUACACAAGCCUGACCCUCCCCAACCCUGCCCCGAG

>hsa-mir-6794 MI0022639  
GGGCGCAGGGGACUGGGGUGAGCAGGCCAGAACCAGCUCGUGCUCACUCUCAGUCCUCCC  
UAG

>hsa-mir-6795 MI0022640  
AGGGUUGGGGGACAGGAUGAGAGGCUGUCUUAUUCUCCUUGACCACCCUCGUUUCUCCCC  
CAG

>hsa-mir-6796 MI0022641  
UUACCUUGUGGGGUUGGAGAGCUGGCUGGUCCAGCCCCUCAGAAGCUCUCCCCUCCCCGAG

>hsa-mir-6797 MI0022642  
CAGCCAGGAGGGAAGGGGUGAGAACAGGACCUGUGCUCACUGGGGCCUGCAUGACCCUCCUCC  
CCCACAG

>hsa-mir-6798 MI0022643  
GGCAGCCAGGGGAUGGGCGAGCUUGGGCCCAUUCUUCUJACCCUACCCCCAUCCCCUGU  
AG

>hsa-mir-6799 MI0022644  
GAGGAGGGGAGGUGUGCAGGGCUGGGGUCACUGACUCUGCUUCCCCUGCCUGCAUGGUGUCCCC  
ACAG

>hsa-mir-6800 MI0022645  
ACCUGUAGGUGACAGUCAGGGGCGGGGUGUGGUGGGGCUGGGGCUGGCCCCUCCUCACACCUCU  
CCUGGCAUCGCCCCCAG

>hsa-mir-6801 MI0022646  
UGGCCUGGUCAGAGGCAGCAGGAAAUGAGAGUUAGCCAGGAGCUUUGCAUACUCACCCUCCAC  
UCACUGGCCCCCAG

>hsa-mir-6802 MI0022647  
GAGGGCUAGGUGGGGGCUUGAAGCCCCGAGAUGCCUCACGUCUUCACCCUCCUACCCUAAGCAG

>hsa-mir-6803 MI0022648

---

CUCCUCUGGGGUGGGGGCUGGGCGUGGUGGACAGCGAUGCAUCCUCGCCUUCUCACCCUCAG  
>hsa-mir-6804 MI0022649  
GGAUGUGAGGGUGUCAGCAGGUGACGGUGGGGGCCACGCUGACAGCCGCACCUGCCUCUCACCCA  
CAG  
>hsa-mir-6805 MI0022650  
UGGCCUAGGGGGCGGCUUGUGGAGUGUAUGGGCUGAGCCUUGCUCUGCUCUCCCCGCCCCAG  
>hsa-mir-6806 MI0022651  
UGCUCUGUAGGCAUGAGGCAGGGCCCAGGUUCCAUGUGAUGCUGAAGCUCUGACAUUCUGCAG  
>hsa-mir-6807 MI0022652  
GUGAGCCAGUGGAAUGGAGAGGCUGUGGGCAGGGGGAGAUGUGAAGGAAAGAACUAGGACCCAUU  
CAUCCACUGCAUUCUGCUUGGCCAG  
>hsa-mir-6808 MI0022653  
GGGGCCAGGCAGGGAGGUGGGACCAUGGGGGCCUUGCUGUGUGACCACCGUUCUGCAG  
>hsa-mir-6809 MI0022654  
AAUGUUGGCAAGGAAAGAAGAGGAUCAUGUUUGCCCCGUGGACAGCUCUCUGGUGUGCUCCUCC  
UGCCAUCCUGCCCACCCUGCAUAAUGCUGCUUCUCUUCUCUCCUCCAG  
>hsa-mir-6810 MI0022655  
CUGGGAUGGGGACAGGGAUCAGCAUGGCACAGAUCCAAUACCUUCUGUCCCCUGCUCCCUUGUUC  
CCCAG  
>hsa-mir-6811 MI0022656  
UAUGCAGGCCUGUGUACAGCACUCAGGCAGUGCCAUGAGCCUGUGCUUGUCCUGCAG  
>hsa-mir-6812 MI0022657  
UGAGGAUGGGGUGAGAUGGGGAGGAGCAGCCAGUCCUGUCUCACCCGCUCUCCCCUGACCCCAG  
>hsa-mir-6813 MI0022658  
GUAGGCAGGGCUGGGGUUCAGGUUCUCAGUCAGAACCUGGCCCCUCUCCCCAG  
>hsa-mir-6814 MI0022659  
UUUCCUCCAAGGGUGAGAUGCUGCCACCCAGCCCUGCAGAGCCCUGACUCGCAUCCUCCCUU  
GGCAG  
>hsa-mir-6815 MI0022660  
CACUGUAGGUGGCGCCGGAGGAGUCAUUUCCAUCACUAAUGGCUUCUCUUGCACACCCAG  
>hsa-mir-6816 MI0022661  
CCGAGUGGGGCGGGCAGGUCCUGCAGGGACUGUGACACUGAAGGACCUGCACCUUCGCCACA  
G  
>hsa-mir-6817 MI0022662  
AGGAUUCUGCCAUAAGGAAGCUUGGAGUGGAACUGACCUGCCCCCUUCUCUCUGACUCCAUGGCA  
G  
>hsa-mir-6818 MI0022663  
CUAUUUUGUGUGAGUACAGAGAGCAUCUGAAUGGGUACAGUUGUUGUCUCUUGUUCUCACACAG  
>hsa-mir-6819 MI0022664  
GAGGGUUGGGGUGGAGGGCCAAGGAGCUGGGUGGGGUGCCAAGCCUCUGUCCCCACCCCAG  
>hsa-mir-6820 MI0022665  
CCUUCUGCGGCAGAGCUGGGGUCACCAGCCCUAUGUACUUGUGACUUCUCCCCUGCCACAG  
>hsa-mir-6821 MI0022666  
GUGCGUGGUGGCUCGAGGCGGGGUGGGGGCCUCGCCUGCUUGGGCCUCCUGACCUCUCCGC



UCCGCACAG

>hsa-mir-6822 MI0022667

UGGCCAGGGAACAGUUGGGGCUUCCGCUCUGCAGAGGCUCUAAACUGGCUUCCCUGCAG

>hsa-mir-6823 MI0022668

CAAGGUCAGGGUUGGUAGGGUUGCUGUUGCUGUGAAAGCUGAGCCUCUCCUCCCUCAG

>hsa-mir-6824 MI0022669

GAGGUGUAGGGGAGGUUGGGCCAGGGAUGCCUUCACUGUGUCUCUCUGGUCUUGCCACCCAG

>hsa-mir-6825 MI0022670

GGGCAUGGGGAGGUGUGGAGUCAGCAUGGGGCUAGGAGGCCCGCGCUGACCCGCCUUCUCCGCA  
G

>hsa-mir-6826 MI0022671

CUUGGUCAAUAGGAAAGAGGUGGGACCUCUCCUGGCUUUUCCUCUGCAGCAUGGCUCGGACCUAGUG  
CAAUGUUUAAGCUCUCCCUCUCUUUCCUGUUCAG

>hsa-mir-6827 MI0022672

UCUGGUGGGAGCCAUGAGGGUCUGUGCUGUCUCUGAGCACCGUCUCUUCUGUCCCCAG

>hsa-mir-6828 MI0022673

GGCUCAGGAAGCAAGAGAACCCUGUGGUCUAAACUUUCCCAUCUGCUCUCUUGUCCCCAG

>hsa-mir-6829 MI0022674

CAGCGUGGGCUGCUGAGAAGGGGACGGGUCCUCCAGCUCAUCCUCCUGCCUCCUCCGUGGCCUC  
AG

>hsa-mir-6830 MI0022675

GUGCCCCAAGGAAGGAGGCUGGACAUCCCUCUUCUGUUUCUCACUGGUGUCUUUCUUCUCUCCCC  
UGCAG

>hsa-mir-6831 MI0022676

GUAGGUAGAGUGUGAGGAGGAGGUCUGAGCCAUGUGUGGACCUAGGUCUGCUGUAAACUGACU  
AACUCCCACUCUACAG

>hsa-mir-6832 MI0022677

GGUGGAGUAGAGAGGAAAAGUUAGGGUCAGUGGCAGAGCCAGGCAGAUGCUGACCCUUUUUCUCU  
UCCCCAG

>hsa-mir-6833 MI0022678

AAACGGUGUGGAAGAUGGGAGGAGAAAAUCCCUGUUAACUUCUCUCUCCACUCCUCAG

>hsa-mir-6834 MI0022679

GUGAGGGACUGGGAUUUGUGGGGCGAGGAGGGACCUGUACUAGCCAUGGUUCUGAUCACAU AUGU  
CCCAUCCCUCCAUCAG

>hsa-mir-6835 MI0022680

UGAUGAGGGGGUAGAAAGUGGCUGAAGCGAGAUGUUUGUCUAAAAGCACUUUUCUGUCUCCCAG

>hsa-mir-6836 MI0022682

GGCUCCGCAGGGCCUGGCGCAGGCAUCCAGACAGCGGGCGAAUGCCUCCCCCGGCCCGCAG

>hsa-mir-6837 MI0022683

GUGGGACCAGGGCCAGCAGGGAAUGUCAGGGCCACCCUUGACCUUCACUGUGACUCUGCUGCAG

>hsa-mir-6838 MI0022684

CAGGGAAGCAGCAGUGGCAAGACUCCUAGGUCACGGAAGUCCUGCUUCUGUUGCAG

>hsa-mir-6839 MI0022685

UGUAGUCUGGAUUGAAGAGACGACCCAAGCAGGCUUUGUGUGAGCAGUGAGGCUAUUUAUUCACU

---

UGGGUGCGAGCUCACACGAAGCCUGCUUGGGUUUUCUCUCAAUCCAG  
>hsa-mir-6840 MI0022686  
UGACCACCCCGGGCAAAGACCUGCAGAUCCCCUGUUAGAGACGGGCCAGGACUUUGUGCGGGG  
UGCCA  
>hsa-mir-6841 MI0022687  
GUGUUUAGGGUACUCAGAGCAAGUUGUGAAACACAGGUGUUUUUAACCUCACCUUGCAUCUGCA  
UCCCCAG  
>hsa-mir-6842 MI0022688  
AGCCUUGGGGUGGUCUCUAGCCAAGGCUCUGGGGUCUCACCCUUGGCUGGUCUCUGCUCCGCAG  
>hsa-mir-6843 MI0022689  
CCCCAUUUCCUCAGGAAUAAAAGUGCAGCAGUGCCUGCUGUGGGGACAGCUGAGGGCAGUGAGG  
CCCUGGGGAGCUGCUGCAGGCAGCAGGUGGGCGGGACGCCAGCAGGCUGUCUAGCUGUCCCAUG  
AUGGUCUCCUGUUCUCUGCAG  
>hsa-mir-6844 MI0022690  
GAACUUAAGAAUUUUGUAGAAAUCAAGCUAUUUGCUAAAAGUUCUUUGUUUUAAUUCACAG  
>hsa-mir-6845 MI0022691  
AACUCGGGGCCAGAGCAGAGAGCCCUUGCACACCACCAGCCUCUCCUCCUGUGCCCCAG  
>hsa-mir-6846 MI0022692  
CAGGCUGGGGGCUGGAUGGGGUAGAGUAGGAGAGCCCACUGACCCCUUCUGUCUCCCUAG  
>hsa-mir-6847 MI0022693  
GACCCACAGAGGACAGUGGAGUGUGAGCUGGAAGGAGUGGGCCUGGCUCAUGUGUCUGUCCUCU  
CCAG  
>hsa-mir-6848 MI0022694  
GUCCUUGGGGGCUGGGAUGGGCCAUGGUGUGCUCUGAUCCCCUGUGGUCUCUUGGCCCCAGGA  
ACUCC  
>hsa-mir-6849 MI0022695  
CCUGGGAGUGGAUAGGGGAGUGUGUGGAGAGAGCACUGAGCCUGCCCACCAGCCUGUGUCCACCU  
CCAG  
>hsa-mir-6850 MI0022696  
GUGCGGAACGCUGGCCCGGGGCGGGAGGGGAAGGGACGCCCGGCCGGAACGCCGCACUCACG  
>hsa-mir-6851 MI0022697  
CAGGGAGGAGGUGGUACUAGGGGCCAGCAACCUGAUUACCCUCUUUGGCCCUUUGUACCCCUCC  
AG  
>hsa-mir-6852 MI0022698  
UGCUGCCCUGGGGUUCUGAGGACAUGCUCUGACUCCCCUGAUGUCCUCUGUUCCUCAGGUGCUGG  
G  
>hsa-mir-6853 MI0022699  
GGGAAAGCGUGGGAUGUCCAUGAAGUCAGGUGAUGGUGAUAAAGGUCAAGGCCUGUUCAUUGGAAC  
CCUGCGCAG  
>hsa-mir-6854 MI0022700  
AAAGCAAGCUCAGGUUUGAGAACUGCUGAUGUCAUCAGUCAUAACUUCUGCGUUUCUCCUCUUGA  
GCAG  
>hsa-mir-6855 MI0022701  
GCUCGUUGGGGUUUGGGGUGCAGACAUGCCAGAGGAUGGGCAGCAGACUGACCUUCAACCCAC

AG

>hsa-mir-6856 MI0022702

UGGAAAAGAGAGGAGCAGUGGUGCUGUGGCAGUGGCAGAGGUCGCUACAGCCCUGUGAUCUUUCC

AG

>hsa-mir-6857 MI0022703

GCUUGUUGGGGAUUGGGUCAGGCCAGUGUUCAAGGGCCCCUCCUCUAGUACUCCCUGUUUGUGUU

CUGCCACUGACUGAGCUUCUCCCCACAG

>hsa-mir-6858 MI0022704

GUGAGGAGGGGUCUGGCAGGGACCCUCCAAGUUGGGGACGGCAGCCAGCCCCUGCUCACCCCUCG

CC

>hsa-mir-6859-1 MI0022705

UGUGGGAGAGGAACAUGGGCUCAGGACAGCGGGUGUCAGCUUGCCUGACCCCCAUGUCGCCUCUG

UAG

>hsa-mir-6860 MI0022707

GUUAAGCAUUGGGGAGUUUGGAGUCGGUGGGUGGAGCCAAACUGGGCAGGGCUGUGGUGAGUGAG

U

>hsa-mir-6861 MI0022708

GAGGCACUGGGUAGGUGGGGCUCAGGGCUCUGACACCCUGGACCUCUCCUCCCCAGGCCACA

>hsa-mir-6862-1 MI0022709

CGAAGCGGGCAUGCUGGGAGAGACUUUGUGAUUUGUCUCCAAAGCCUCACCCAGCUCUCUGGCC

UCUAG

>hsa-mir-6863 MI0022710

AUUUAUGAGGCAGCAGAGUCUACAAGUAAAUCAUGAAUCCAGUUGAAAAUGUAAAUGAGGCCAUA

GACGUGGUGAAGGAUUGAGUGACCU

>hsa-mir-6864 MI0022711

GAAAGUUGAAGGGACAAGUCAGAUUAGCCAUUAUGUGGGUCAUGAGGUGGUGAGACUUCUCUCCC

UUCAG

>hsa-mir-6865 MI0022712

AUCCAUAUGGUGGCAGAGGAGGGACUUCAGAUGCUUCAUGACACCCUCUUUCCCUACCGCCUACAG

>hsa-mir-6866 MI0022713

CCAUUUJAGAGGCUGGAAUAGAGAUUCUUGAGGCUUGGAAGAGUAAGGAUCCCUUUAUCUGUCCU

CUAG

>hsa-mir-6867 MI0022714

CCCGGUGUGUGUGUAGAGGAAGAAGGAAGCUGGGAACCUGACUGCCUCUCCUCUUUACCCACU

AG

>hsa-mir-6868 MI0022715

CCAGGACUGGCAGAACACUGAAGCAGCAGGCACCUGCUUCCUUCUGUUGUCUGUGCAG

>hsa-mir-6869 MI0022716

GUGAGUAGUGGCGCGGGCGGCUCGGAGUACCUCUGCCGCCGCGCAUCGGCUCAGCAUGC

>hsa-mir-6870 MI0022717

CAAGGUGGGGAGAUGGGGUUGAACUUAUUCUCAUGCUCAUCCCCAUCUCCUUUCAG

>hsa-mir-6871 MI0022718

CUCCUCAUGGGAGUUCGGGGUGGUUGCUGGAGGUCAGCACCCUGUGGCUCCCACAG

>hsa-mir-6872 MI0022719

GUGGGUCUCGCAUCAGGAGGCAAGGCCAGGACCCGCUGACCCAUGCCUCCUGCCGCGGUCAG  
>hsa-mir-6873 MI0022720  
CCCAGCAGAGGGAAUACAGAGGGCAAUCAGGACUGGGUCAUUCUCUCUGUCUUUCUCUCUCAG  
>hsa-mir-6874 MI0022721  
GCCACAUGGAGCUGGAACCAGAUCAGGCCUUUAAUGUUUGAAGUAAUGUCAGUUCUGCUGUUCUGA  
CUCUAG  
>hsa-mir-6875 MI0022722  
GAGUCUGAGGGACCCAGGACAGGAGAAGGCCUAUGGUGAUUUGCAUUCUCCUGCCCUGGCUCCA  
UCCUCAG  
>hsa-mir-6876 MI0022723  
AGUUGCAGGAAGGAGACAGGCAGUUCAGGAGGUGGCACUCGUGUGUGAGCUGUCUGUGUUUC  
CUUCUCAG  
>hsa-mir-6877 MI0022724  
AGUUCAGGGCCGAAGGGUGGAAGCUGCUGGUGCUCAUCUCAGCCUCUGCCUUGGCCUCCCCAG  
>hsa-mir-6878 MI0022725  
AUGAGAGGGAGAAAGCUAGAAGCUGAAGAUUCUGAAAAUCACUAACUGGCCUCUUCUUCUCCUA  
G  
>hsa-mir-6879 MI0022726  
CAGAGCAGGGCAGGGAAGGUGGGAGAGGGGCCAGCUGACCCUCCUGUCACCCGCUCUUGCCCA  
G  
>hsa-mir-6880 MI0022727  
GAGGGUGGUGGAGGAAGAGGGCAGCUCCEAUGACUGCCUGACCGCCUUCUCUCCUCCCCAG  
>hsa-mir-6881 MI0022728  
UGCACUGGGGUAAGGAUAGGAGGGUCAGGUCUGCAGCCUUGUAUCUGCUGAUCCUCUUCGUCCU  
UCCCACUCCAG  
>hsa-mir-6882 MI0022729  
GGCUUUACAAGUCAGGAGCUGAAGCAGCUGGAAUUCAAGCCUCGUGCCUCUCCUCUUGCCUGCA  
G  
>hsa-mir-6883 MI0022730  
CAGACAGGGAGGGUGUGGUAUGGAUGUGUUGACCCUGAAGUGGUUCUGAUGACCUUCCCUAUC  
UCACUCUCCUCAG  
>hsa-mir-6884 MI0022731  
CCCGCAGAGGCUGAGAAGGUGAUGUUGGCUCAAGAAAGGGAGAUAGAUGGUAGCCCAUCACCUUU  
CCGUCUCCCUAG  
>hsa-mir-6885 MI0022732  
CCUGGAGGGGGGCACUCGCAAGCAAAGCCAGGGACCCUGAGAGGCUUUGCUUCCUGCUCCCCUA  
G  
>hsa-mir-6886 MI0022733  
CUUGGCCCGCAGGUGAGAUGAGGGCUCUCCUGGCGCUGAUGCCCUUCUCUCCUCCUGCCUCAG  
>hsa-mir-6887 MI0022734  
GAGAAUGGGGGGACAGAUGGAGAGGACACAGGCUGGCACUGAGGUCCCCUCCACUUUCCUCCUAG  
>hsa-mir-6888 MI0022735  
GUGGGAAGGAGAUGCUCAGGCAGAUCUGUCUCUGAUUGUUCCAAGAUCUGUCUCGAUUGUUUCC  
AG

---

>hsa-mir-6889 MI0022736  
CUGUGUCGGGGAGUCUGGGGUCCGAAUUCUCCAGAGCCUCUGUGCCCCUACUUCCAG

>hsa-mir-6890 MI0022737  
UGGGCCAUGGGGUAGGGCAGAGUAGGGCUGGAUGGUAGGGCCCACUGCCUAUGCCCCACAG

>hsa-mir-6891 MI0022738  
GUAAGGAGGGGAUGAGGGGUCAUAUCUCUUCUCAGGGAAAGCAGGAGCCCUUCAGCAGGGUCAG  
GGCCCCUCAUCUCCCCUCCUUCUCCAG

>hsa-mir-6892 MI0022739  
GUAAGGGACCGGAGAGUAGGAAAAGCAGGGCUCAGGGCCAGAGAGACUGGGCAUAGAACUAAGGA  
GGAUGGUGUCCUCCUGACUGCAUCUCUCUCCUCUCCCACCCCUUGCAG

>hsa-mir-6893 MI0022740  
CCGGGCAGGCAGGUGUAGGGUGGAGCCCACUGUGGCUCUCCUGACUCAGCCUUGCUGCCUUCACCUG  
CCAG

>hsa-mir-6894 MI0022741  
CAAGAAGGAGGAUGGAGAGCUGGGCCAGACAUGCUCUUGCCUGCCCUCUUCUCCAG

>hsa-mir-6895 MI0022742  
CAGCUCAGGGCCAGGCACAGAGUAAGCAUCAUAGCAUUGGCAAGUUGAACUGAGCUGUCUCUCG  
CCCUUGGCCUAG

>hsa-mir-7106 MI0022957  
GCUUCUGGGAGGAGGGGAUCUUGGGAGUGAUCCCAACAGCUGAGCUCUCCUGAAUCCUGUCCAG

>hsa-mir-7107 MI0022958  
UGCCGUCGGCCUGGGGAGGAGGAAGGGCAAGUCCAAAGGUUAACAGUUGGUCUGUUCAUUCUCUC  
UUUUUGGCCUACAAG

>hsa-mir-7108 MI0022959  
GUGUGGCCGGCAGGCGGGUGGGCGGGGGCGGCCGGUGGGAACCCCGCCCCGCCCCGCGCCCGCAC  
UCACCCGCCCCUCUCCCCACAG

>hsa-mir-7109 MI0022960  
GUCUCCUGGGGGAGGAGACCCUGCUCUCCUGGCAGCAAGCCUCUCCUGCCCUUCCAGAUUAGC

>hsa-mir-7110 MI0022961  
GGGGCUGGGGGUGUGGGGAGAGAGUGCACAGCCAGCUCAGGGAUUAAGCUCUUUCUCUCUCU  
CUCUCUCCACUUCCUGCAG

>hsa-mir-7111 MI0022962  
CUGGGGGAGGAAGGACAGGCCAUCUGCUAUUCGUCCACCAACCUGACUUGAUCCUCUUCUCCUC  
CUCCAG

>hsa-mir-7112-1 MI0022963  
ACGGGCAGGGCAGUGCACCCUGCAGGUGAGAGCGGGAACACCUGCAUCACAGCCUUUGGCCCUAG

>hsa-mir-7113 MI0022964  
CUCCAGGGAGACAGUGUGUGAGGCCUCUUGCCAUGGCCUCCUGCCCGCCUCUCUGCAG

>hsa-mir-7114 MI0022965  
UCCGCUCUGUGGAGUGGGUGCCUGUCCCCUGCCACUGGGUGACCCACCCUCUCCACCAG

>hsa-mir-7150 MI0023610  
CACGGUGUCCUCCUGGUGGAACCUGGCAGGGGGAGAGGUAAGGUCUUUCAGCCUCUCCAAAGCCCA  
UGGUCAGGUACUCAGGUGGGGGAGCCUG

>hsa-mir-7151 MI0023611

GAUCCAUCUCUGCCUGUAUUGGCUUGGAUUCUGCAAAGCCUACAGGCUGGAAUGGGCUCA  
>hsa-mir-7152 MI0023612  
UUUCCUGUCCUCCAACCAGACCAUGCCACAUCCGUCUGGUCUGGACAGGAGGC  
>hsa-mir-7153 MI0023613  
UGAGAACUGACAAAUGUGGUAGGUGGUCGAAGUCAUCCACACCAUGGACGGUUUACC  
>hsa-mir-7154 MI0023614  
UUCAUGAACUGGGUCUAGCUUGGAGCCUUGGUAGGGAAGCAAGCUGAGGAGAUAGGAGGACAAGU  
UGUGGGAU  
>hsa-mir-7155 MI0023615  
UCUGGGGUCUUGGGCAUCUGGUUGUGACAUCACUGAUGGCCCAAGACCUCAGACC  
>hsa-mir-7156 MI0023616  
UUGUUCUCAAACUGGCUGUCAGAGUGUGCAUGGCAGGCUGCAGCCACUUGGGGAACUGGU  
>hsa-mir-7157 MI0023617  
UCAGCAUUCAUUGGCACCAGAGAUGAAAUUGGGACUCCUCUGUCUACUGGAUGAAGAGU  
>hsa-mir-7158 MI0023618  
GGCUCAAUCUCUGGUCCUGCAGCCUUCUGCCUUGGCUUUCUGAAGCGAGCUGAACUAGAGAUUG  
GGCCCA  
>hsa-mir-7159 MI0023620  
UUCAACAAGGGUGUAGGAUGGCCAGGGAAGUAUGCCGGGCCUUGGCAUUUCUAUGUUAGUUGGAA  
G  
>hsa-mir-7160 MI0023621  
UGCUGAGGUCCGGGCUGUGCCCCGUACCGGACAGGGCCCUGGCUUUAGCAGA  
>hsa-mir-7161 MI0023619  
UAAAGACUGUAGAGGCAACUGGUGUUCACGCAAAGUGGCCAGGGUGUGGGAGACUAGAUCUUU  
GACUCUGGCAGUCUCCAGG  
>hsa-mir-7162 MI0023623  
UGC UCCUUCUCAGCUGAACCCUUGCCCCUGGAGCCCCCAGCAGGGCCCUCUGAGGUGGAACAG  
CAGC  
>hsa-mir-7515 MI0024354  
CUUUUAUCAUUUCAUUUAUGCCUGUUAGCAUGAAAAAAGAGGCUGAGAAGGGAAGAUGGUGACAA  
GG  
>hsa-mir-7641-1 MI0024975  
UCUCGUUUGAUCUCGGAAGCUAAGCAGGGUUGGGCCUGGUUAGUACUUGGAUGGGAAACUU  
>hsa-mir-7702 MI0025238  
CUUAGACUGCCAGACUCCUGAGGACAUGCAGUUUCAGGGAGUCUGGUAGUCUAAGUGU  
>hsa-mir-7703 MI0025239  
UUAGGGGAGGUGGAUGAGUGGGGGCAGGCAGGGGAUUGGCUAAGAACCUGACUCUUGCACUCUGG  
CCUUCUCCAGG  
>hsa-mir-7704 MI0025240  
CGGGGUCGGCGGCGACGUGCUCAGCUUGGCACCCAAGUUCUGCCGCUCGACGCCCGGC  
>hsa-mir-7705 MI0025241  
AAUAGCUCAGAAUGUCAGUUCUGUUUAAGUAACAGAAUUGAUAAACUGAGCAAGGAA  
>hsa-mir-7706 MI0025242  
UGGAGCUGUGCAGGGCCAGCGCGGAGCCCAGCAGCCGCGGUGAAGCGCCUGUGCUCUGCCGA

GA

>hsa-mir-7843 MI0025510

GUAGACAGGAUGAGGGCAGAGCCAGCUUCCUGAUCUGAUGGAAGUCAUGAAGCCUUCUCUGCCUU  
ACGCUUGGCUCUGC

>hsa-mir-7844 MI0025514

UGAUUGUGCGGACUCGUGUGUAAGAAAAACUAGGACUGUGUGGUGUAAAUAACUACAAUUCUCUU  
AACUCCGUAGCAGUUGCCAACUCAGUCCUUGUACUUCGUUAACACGAAUCUGUUUCA

>hsa-mir-7845 MI0025515

GCAAGGGACAGGGAGGGUCGUGGCGACACUCGCGCCAGCUCGCCGGGACGGCUGGGCUCGGGCUGG  
UCGCCGACCUCGGACCCUCCACUAGAUGCCUGGC

>hsa-mir-7846 MI0025516

GCCCCGCCGCCUGGCCUCUGGCCCGCUGGGGCGCGGGCUUUCGCUUUCAGUCGAGGGCUAGCGAG  
CGCAGCGGAGCCUGGAGAGAAGGCGCUGGGC

>hsa-mir-7847 MI0025517

GUGUCGGCUGUGGCGUGACUGUCCUCUGUGUCCCCACUAGGCCACUGCUCAGUGGAGCGUGG  
AGGACGAGGAGGAGCCGUCCACGAGCAAUGCCAGCAU

>hsa-mir-7848 MI0025518

GCUGGGGUCUGGGUGGGUGUGGCAGGCCACCUUGGGUAUGCAAAGCUCUGACAGUGUUUCACUUG  
CUACCCUCGGUCUGCUUACCACACUCCAGUUCUGC

>hsa-mir-7849 MI0025519

GACUUUAUAUUGUUGAACAUCAGACUCAAGGCCAACACUGACUACUUCGAAAUGGGAAGUAGA  
CAAUUGUUGAUCUUGGGCCUGAUGUUCAACAUAUAAAGUU

>hsa-mir-7850 MI0025520

GGUCAGAAGUUUGGACAUAGUGUGGCUGGGUCCUCUGUGCAGGGUCUUAACCCAGCCACACUACAU  
CCAAACUUCUGACC

>hsa-mir-7851 MI0025521

UGGCUCACUCGAGCCUCCCCGCCCCUCAGGUGAUCCUCCACCUCAUCCUCCCAAGUAGCUGGG  
AAUACAGGUGUGGCCACCAUGCCUCUACAAGCUACCUUGGGAGACUGAGGUUGGAAGAUUGCUUG  
AGCCUAGGAGGUCGAGGCGACAGUGAGCCA

>hsa-mir-7852 MI0025522

UAAAUGCCUUUGACUACUACAUAUAUGCCUACUACUACUUAUAUGUAGGCAUAUGUAUGUA  
GUAGUCAAGGCAUUUA

>hsa-mir-7853 MI0025523

UCUCACACUUCAAUAGGCAUUGUCUGGGGUCUUAUUCAAAUGCAGAUCCUGACUUCACUGGUGCA  
GUAAGAAGUCAGAGAAUCUGCAUCUGUAACAAGCUCCAGGUGAUGAUGGUGCUGCUGGUGUGCA  
GA

>hsa-mir-7854 MI0025524

UUCCUCCAUCUCCAUCACCUUGAGCAUCUUCUGGGCAGCUGAGGUGACCGCAGAUGGGAAGGAA

>hsa-mir-7855 MI0025525

GCUUGGUGAGGACCCCAAGCUCGGCACUAUUGUGACUGUGCUUUUGGCUUCCUUCCAGGC

>hsa-mir-7856 MI0025526

UGUUUUAAGGACACUGAGGGAUCCUUUGUUCUGGAUCCUCAGUGUCCUUAAAACA

>hsa-mir-7973-1 MI0025748

UGUGACCCUAGAAUAAUUAACCCAACGUCUCUGAGUCUCGGUUUUUGAGAGGGUGAGUAAUUAUUCU

AGGGUCACACA

>hsa-mir-7973-2 MI0025749

UGUGACCCUAGAAUAAUUACUCACCCUCUCAAACCGAGACUCAGAGACGUUGGGUAAUUUUCU  
AGGGUCACACA

>hsa-mir-7974 MI0025750

GCUCGGCCCCACAGCGAAACGGCCGCCUAAACCACCCAGGCCUUAUGGCUUCAUAGGCUGUGAU  
GCUCUCCUGAGCCC

>hsa-mir-7975 MI0025751

GUGCAAAGAGCAGGAGGACAGGGGAUUUAUCUCCCAAGGGAGGUCCCCUGAUCCUAGUCACGGCA  
CCA

>hsa-mir-7976 MI0025752

UGCCCUGAGACUUUUGCUCUAAUAAUUUAUUCUAAUAAUAAUUUAGAUCAAAAGCCUCAGGGCAG  
A

>hsa-mir-7977 MI0025753

UUCCCAGCCAACGCACCAAAAAUGAUUAGGGUCUGUUGUCUGGAGAAAC

>hsa-mir-7978 MI0025754

UCUGGUGUAUAGCGUUGCUCUAGUCCUCUAAUUUCUUUGAACAAACAGUAUACACCAAAUA

>hsa-mir-8052 MI0025888

UGGAGGGCUGCGGGACUGUAGAGGGCAUGAGCUCAGGAGCUCAGGCCAGCUCUAGGUGCAAGGCC  
UCUG

>hsa-mir-8053 MI0025889

GCUUUCCACUGGCGAUUUUGAACUCAUUGGCAGAAAUGUCAAGAAGAGUUUUUACCUUUGCCG  
AAAGAGAAAA

>hsa-mir-8054 MI0025890

CAGCAAUGCAGAAAGUACAGAUCCGGAUGGGUUCAAUAGAUUGCUUUAGCUGAAGCAAGCCUCCCC  
AUUGUACAUUCUCAUUGUCU

>hsa-mir-8055 MI0025891

UUACGGUCACACUGUGCUCACUUUGUCAAAUAAAAGAUGGAGUCGUUUGACGUCUUUUAACACCC  
UUUGAGCACAUGAGCAGACGGAGUGAUCAUGA

>hsa-mir-8056 MI0025892

CUUCUCUGAGCAUCCAGCCUCUAGGAGCUGUGCCUCCUGGCCUAUUCUGUUCGUGGAUUGUCUG  
GAUGCAUCCUUGAGACU

>hsa-mir-8057 MI0025893

AAUUUGGGAUGUGGCUCUGUAGUAAGAUGGACUUGCGGUUCAUCCAGCUCAGGGCCUUUUUAA  
AUUA

>hsa-mir-8058 MI0025894

UGGUCACUGCCAGUGCUGAGACAUUAAAGAUCCAGGCCCCACGGAGAACCAGGGCACCUGGACUU  
UGAUCUUGCCAUAUUGGUAUGCCU

>hsa-mir-8059 MI0025895

UACAGGUGCAGGGGAACUGUAGAUGAAAAGGCUUGGCACUUGAGGGAAAGCCUCAGUUCAUUCUC  
AUUUUGCUCACCUGUU

>hsa-mir-8060 MI0025896

UUUAAAUCCUGUUUUUCCACUACUUAUUCUGGUCAGAUUCCCAUGAAGCAGUGGGUAGGAGGA  
CAGGAAAAAGC



---

>hsa-mir-8061 MI0025897  
GAGAGGAUGCCUUAGAUUAGAGGAUAUUGUUCAGUGGGAUUUGGAGAGGACGCCUUAGAUUAGAG  
GUAUUGUUCA

>hsa-mir-8062 MI0025898  
CUUAUGCAUGCAGUGAUUUGAGGAUUAUUGCUCACGGUAAGAAAACAUGAGUAAUAUAUUGUCU  
UCAAGAACCUAUGCUCUAA

>hsa-mir-8063 MI0025899  
UAGAGGCAGUUUCAACAGAUGUGUAGACUUUUGAUUAGAGAAAUUGGUUUCAAAAUCAGGAGUCG  
GGGCUUJACUGCUUUU

>hsa-mir-8064 MI0025900  
AGAUGGAGUGAGCACACUGAGCGAGCGGACAUCUCCAUAAGUAAAUAAGCGGUGCCGCGCGCUC  
CGCUGGCUCCAAACACUCCAGUCC

>hsa-mir-8065 MI0025901  
CAGUACAUGAGAGCCAUCAUUUUUGUUGUUGUUAUUUUUCAGCAAGGCAAGGGCUUUGAUGUC  
UUGUAGGAACAGUUGAAUUUUGGCUUCAUGUAAUU

>hsa-mir-8066 MI0025902  
CAUCUUGCUUACAUUCUGUGGAACAUAUUGUUGCCUCUGCAUGUUACA AUGUGAUCUUUUGGAU  
GUAGGGCAAUCU

>hsa-mir-8067 MI0025903  
UUCUGUGUUUCCUAGAAACUGUAAACUUAGUCAUAAAGAUGAUCCUGAGUGCACAGUCUUUCUUG  
AGACUUUCAGCC

>hsa-mir-8068 MI0025904  
GGCUAACUCAUGUUUGUUAAGGAUCGUUGUGGCAAUACAGUUAUCCUUACAACAAAUACUUUG  
CCA

>hsa-mir-8069 MI0025905  
CGCCUGAGCGUGCAGCAGGACAUCUCCUGACCUGGUAAUAAUAGGUGAGAAGGAUGGUUGGGG  
GCGGUCGGCGUAACUCAGGGA

>hsa-mir-8070 MI0025906  
ACUUGAUCCCAUGUGAUUGACGGCUGACUCCAUGUGAGUGAAGCCUGAUCAUCAUGUGAGUGAAG  
CCUGAUCAUCAUGUGAGUGAAGC

>hsa-mir-8071-1 MI0025907  
CGGCCACAUGGCCAGGCUCUUCUCCGAGUGAUCUCGGUGGACUGGAGUGGGUGGUAGGUGGCAG

>hsa-mir-8072 MI0025908  
GCGUCAAGAUGGCGGCGGGGAGGUAGGCAGAGCAGGACGCCGCGUCGCGCCGCCACCGCCGCC  
UCCGCUCCAGUCGCC

>hsa-mir-8073 MI0025909  
GAUUUCAGUGACCUGGCAGCAGGGAGCGUCGUCAGUGUUUUGACUGUUUAUGGUAUGUCAGGGAGC  
UGGUUCC

>hsa-mir-8074 MI0025910  
CCAGUUCUGAGUUUAUGCAAGAUGCCAUGGGAGCCCAGAGACGUCCUAUGGCGAGACUGGCAU  
GUACUCACACAACUGA

>hsa-mir-8075 MI0025911  
CCUUGCUGAUGGCAGAUGUCGGAUCUGCCUCGCUUAUACGUGCCCUUGCUGAUGGCAGAUGUCGG  
GUCUGCCUCGCUUAU

---

>hsa-mir-8076 MI0025912  
CCUAUCCACACGUCUGGUCUAGAGUUCUCCUGUGAGAGCUACUAAGUCUUAUAUGGACUUUUCUG  
AUACAAUGUAGUGGAAAG  
>hsa-mir-8077 MI0025913  
GUGGGGCAGGGGGUGGGAUGGGCACUGGGAGUCCAAGGAAAGGGCUGAGUGGGGUUCUGACUCC  
UCUGCCCAAC  
>hsa-mir-8078 MI0025914  
UCCGCCCGCCCCUCCACCGGGCUGACCGGCCUGGGAUUCUGCCUUCUAGGUCUAGGCCCGGU  
GAGAGACUCCACACAGCGG  
>hsa-mir-8079 MI0025915  
UGCCUGGGUUCAGUGAUCGUCUCUGCUGGCUGUAGGGCAGCAGUCAGAGGGGACAUCACAGGCCU  
CCAGAGG  
>hsa-mir-8080 MI0025916  
AUGGCUCUAAGAAGGACACUGGUGUCAACGGCUGAGCCCUUGAUUAAGGGGGAGGUUUGGAAGAC  
ACUUAUGUCCUGGAUUGGGAAAUG  
>hsa-mir-8081 MI0025917  
UUAUUGUCUUUUAUUUUCUGAGUCUUGCCUCUAUGGCCCCCCUCCUCUCUGAAAGCAAGGCCACUU  
GAGUCGUGCCUUUCUGAAUGAAGUCAUGU  
>hsa-mir-8082 MI0025918  
GCCUGUGUGAUGAUGGAGCUGGGAAUACUCUGGGGAGAGAGUCCUCUUUUCAGCUGUAUUUUGCU  
UCCUCCCACACAGAC  
>hsa-mir-8083 MI0025919  
CGAGGGGGUGCAGGACUUGACGGCUGCAACUGUGCGGCCGGCCACACCGUCACACCGGGUGCAGC  
GUCUGUCAUUCUGUACCCUCAUCU  
>hsa-mir-8084 MI0025920  
CAGAUAAAUAGAAUACUAAGUAAAAAUCAGUAUGGAUUAAAUUUUAUUUUUCCUCGAUACUGAG  
UAUUUUUUCUUAGGUUUAGUUUGG  
>hsa-mir-8085 MI0025921  
CUAGGAGGGAUGGGAGAGAGGACUGUGAGGCAUGGGUGGCUCUAUGGUCACGCCCAUCUCCUAC  
>hsa-mir-8086 MI0025922  
UCCACUAGUCUGCUAGUCUGGACUGAUUGGUUAGCUUUUUUUUUUUUUGAGAUGGAGUCUGGC  
UCUGUUGCCCAGGCUGGAGUACAGUGGC  
>hsa-mir-8087 MI0025923  
UCUAAGAAGUGAAGACUUCUUGGAUUACAGGGGCCUACUUUAAGGGCCCUUCAGUUGGAAGUU  
UCCUUUCUGCCU  
>hsa-mir-8088 MI0025924  
GGGAGGAGGCCUCGGUACUGGAAAGGGGUAUGGAUUCUGUUGUUUUGGCAACAUCUUCUUAUC  
GGCACUGGGUCACUCAGCUCA  
>hsa-mir-8089 MI0025925  
AAGGAGCACUCACUCCAAUUCCCUGGACUGGGGGCAGGCUGCCACCUCUGGGGACAGGGGAUU  
GGGGCAGGAUGUCCAG

## (2). 1612 Xue pseudo miRNAs

>random\_seq\_from\_cds\_\_NO\_6 RANDOM\_LENGTH 97 SEQ\_LENGTH 84  
GC\_CONTENT 0.702380952380952 BASEPAIR 31 FREE\_ENERGY

---

-44.90 LEN\_BP\_RATIO 2.70967741935484  
GAGGGCAGGGGGCACAGUCCAACUCCAGGCUUGUAGCUGUCCAGGGGCUGGGUGCCCGCCCGGCA  
CGGGCAGACUGUGUCCUGUGUGGCCGUGCACA  
>random\_seq\_from\_cds\_\_NO\_16 RANDOM\_LENGTH 81 SEQ\_LENGTH 69  
GC\_CONTENT 0.565217391304348 BASEPAIR 23 FREE\_ENERGY  
-23.00 LEN\_BP\_RATIO 3  
AAGCACCAGAGACGAACAGUCUGGUGUCAGGAGCAAGAGAAAGGCUCAUGACAUCUCCAGUGUGU  
CCGGUAAACGUGGUCG  
>random\_seq\_from\_cds\_\_NO\_21 RANDOM\_LENGTH 110 SEQ\_LENGTH 99  
GC\_CONTENT 0.565656565656566 BASEPAIR 29 FREE\_ENERGY  
-28.75 LEN\_BP\_RATIO 3.41379310344828  
AUGGCGUAGAUCUUGGCCAGGUGCCCCGCAGUGUCCUCCUCGUGCGCAUUUGGAUUCUCCCCAC  
UGGGUCGAUGUUGUUUGUGAUCCUGAGAGAGAGUUGCAUCUGCAC  
>random\_seq\_from\_cds\_\_NO\_41 RANDOM\_LENGTH 96 SEQ\_LENGTH 83  
GC\_CONTENT 0.746987951807229 BASEPAIR 30 FREE\_ENERGY  
-39.40 LEN\_BP\_RATIO 2.766666666666667  
CCACCAGAUCCGCGCCACGCUCCCGCACCAGUGCGGCCAGCCCCUUAUCCAGGCGGCCUGAGGUC  
GAGGCACGGGGAGCUGGAGCCCGUCUGCACC  
>random\_seq\_from\_cds\_\_NO\_44 RANDOM\_LENGTH 86 SEQ\_LENGTH 75  
GC\_CONTENT 0.453333333333333 BASEPAIR 26 FREE\_ENERGY  
-24.44 LEN\_BP\_RATIO 2.88461538461538  
CAAAGGGGAAGACUCCCAAAAUGAUGUCUAUCCACUGUUAUCUGCGAAAUAAGGCACAUUUA  
UGAGGGGGCCCCCUUAAUCU  
>random\_seq\_from\_cds\_\_NO\_49 RANDOM\_LENGTH 110 SEQ\_LENGTH 104  
GC\_CONTENT 0.625 BASEPAIR 34 FREE\_ENERGY -40.10  
LEN\_BP\_RATIO 3.05882352941176  
GGGUCCCAUAGGCGCAAGGGCUGCUGCCUCAGGGUCUGAAGCUUGUCCAGUACUUCUGCCGGAA  
CUUCUCCGCCUCUCGGCUGCAUCCACAGAGUCUGGCUGGCUCGC  
>random\_seq\_from\_cds\_\_NO\_65 RANDOM\_LENGTH 75 SEQ\_LENGTH 58  
GC\_CONTENT 0.568965517241379 BASEPAIR 21 FREE\_ENERGY  
-21.60 LEN\_BP\_RATIO 2.76190476190476  
UUGGCGACUUUGUGCUGUACCGUUGAAUAGUAGGCCAGCUUGGUUAACGACCCGCCCUAUGUCGA  
UGGCGAAGCG  
>random\_seq\_from\_cds\_\_NO\_71 RANDOM\_LENGTH 89 SEQ\_LENGTH 73  
GC\_CONTENT 0.616438356164384 BASEPAIR 29 FREE\_ENERGY  
-35.10 LEN\_BP\_RATIO 2.51724137931034  
CACCUUGGUCUGGUGCUGACAUCUCCAGGGUCCAUUGGAGAGAAGGUCCCCGGGGGCAGU  
UCUGACACAGGGUGUCCUGACUCU  
>random\_seq\_from\_cds\_\_NO\_76 RANDOM\_LENGTH 78 SEQ\_LENGTH 64  
GC\_CONTENT 0.671875 BASEPAIR 22 FREE\_ENERGY -26.30  
LEN\_BP\_RATIO 2.90909090909091  
AGGACGGCAGAGCUGGGGCGUAGCAGGGGGCUCCCAGGAAGGUGAGAUACAGCACCCAGCCUCAA  
GACGUCGGUUUUG  
>random\_seq\_from\_cds\_\_NO\_80 RANDOM\_LENGTH 70 SEQ\_LENGTH 61

---

GC\_CONTENT 0.573770491803279 BASEPAIR 23 FREE\_ENERGY  
-19.90 LEN\_BP\_RATIO 2.65217391304348  
GCAUAGUUGAUGAAGAAGAGCUGCUCUAGGGUGAGAUAUCCAGGCCGGCAGCUGCUGGUCCUUGCC  
ACCCU  
>random\_seq\_from\_cds\_\_NO\_86 RANDOM\_LENGTH 84 SEQ\_LENGTH 75  
GC\_CONTENT 0.546666666666667 BASEPAIR 25 FREE\_ENERGY  
-23.10 LEN\_BP\_RATIO 3  
GCGCCACCUUGAGGUUCUGCAGACUGUUCUCAAGUACAGGUCCUCUGAGAAGUUCAGCAUUGG  
AGUACUCCUCGUCCAGGCG  
>random\_seq\_from\_cds\_\_NO\_93 RANDOM\_LENGTH 77 SEQ\_LENGTH 57  
GC\_CONTENT 0.56140350877193 BASEPAIR 20 FREE\_ENERGY  
-15.80 LEN\_BP\_RATIO 2.85  
AGAGUCCAGUAAAUCCCCUUCAGGCCAAACUGGCUUUGCAGCUCCUCCAGUCCCAUCCGGUGGU  
ACAAGGCGAUGA  
>random\_seq\_from\_cds\_\_NO\_112 RANDOM\_LENGTH 110 SEQ\_LENGTH 94  
GC\_CONTENT 0.542553191489362 BASEPAIR 34 FREE\_ENERGY  
-32.91 LEN\_BP\_RATIO 2.76470588235294  
UUCAGCAAGGUCAAGGUCCUCCACUGAUCUCUGCCUCCCGGUGGCUGCUGAAGCGCGGAGAGC  
UGUUCUAGUGGAAGAAACCGGACUUUUUCGAAAAUUGCCAGCC  
>random\_seq\_from\_cds\_\_NO\_117 RANDOM\_LENGTH 88 SEQ\_LENGTH 79  
GC\_CONTENT 0.683544303797468 BASEPAIR 27 FREE\_ENERGY  
-27.20 LEN\_BP\_RATIO 2.92592592592593  
GCAGGCGGACGUGGUCCUGGUUCUGCAGCAGGAGGAUUGGGUGGCUCUAUGGCGAGAGGCUCCGG  
GACGGAGAGACGGAUGGUUCC  
>random\_seq\_from\_cds\_\_NO\_129 RANDOM\_LENGTH 94 SEQ\_LENGTH 61  
GC\_CONTENT 0.655737704918033 BASEPAIR 22 FREE\_ENERGY  
-23.60 LEN\_BP\_RATIO 2.77272727272727  
AUGCUCACGUAUUCUUGCAGUCGCGCCGUUCUGCCAGCGCCAUGUAGCGGCCGUCCUGGUGAA  
GGUGAUUCCUUGCAGACAAGCUUUCGGG  
>random\_seq\_from\_cds\_\_NO\_130 RANDOM\_LENGTH 85 SEQ\_LENGTH 75  
GC\_CONTENT 0.453333333333333 BASEPAIR 26 FREE\_ENERGY  
-22.10 LEN\_BP\_RATIO 2.88461538461538  
UAUUUGAUGUAAGACACGGAUUUUGUGCACAAGGACCAGACGGUUAUCCGCAGCAUGGAAUCCG  
UGGUGUUGAGAAUGUGGCGC  
>random\_seq\_from\_cds\_\_NO\_132 RANDOM\_LENGTH 110 SEQ\_LENGTH 106  
GC\_CONTENT 0.575471698113208 BASEPAIR 37 FREE\_ENERGY  
-32.90 LEN\_BP\_RATIO 2.86486486486486  
CCUGCACCAGCCCUCGCUUGUACAUGGCGCACAGGAUGAAGAGCGAGUCUGCCGACCACUCGAUG  
UGCUGGAUCUGGUCUAGGCACGUGUACAGCUGAAGGAUCUGAAGG  
>random\_seq\_from\_cds\_\_NO\_135 RANDOM\_LENGTH 72 SEQ\_LENGTH 67  
GC\_CONTENT 0.701492537313433 BASEPAIR 23 FREE\_ENERGY  
-26.40 LEN\_BP\_RATIO 2.91304347826087  
UUCGGCGUGGCUGGCCGGAGCUGCCAGGAGGUGCUGCGCAAGGGCUGUCUCCGCUCCAGGCUC  
CUGAGCG

---

```
>random_seq_from_cds__NO_140  RANDOM_LENGTH 89  SEQ_LENGTH  80
  GC_CONTENT  0.5875 BASEPAIR  29  FREE_ENERGY  -31.00
  LEN_BP_RATIO  2.75862068965517
UGGAGUCCCGAUUUCAGAGCAAGUCUGGCUAUCUGAGAUACAGCUGUGAGAGCCGGAUCCGGAGU
UACCUGAGGGAGGGUGAGCUCCUA
>random_seq_from_cds__NO_149  RANDOM_LENGTH 71  SEQ_LENGTH  49
  GC_CONTENT  0.693877551020408  BASEPAIR  20  FREE_ENERGY
-28.50  LEN_BP_RATIO  2.45
CGGAGAGUGUCCUGGCUCUCUCGCAGGGGCAGGCGGGGUCACAGAGGAUGCUCGAGAGAGAGG
UCGGCU
>random_seq_from_cds__NO_153  RANDOM_LENGTH 70  SEQ_LENGTH  53
  GC_CONTENT  0.566037735849057  BASEPAIR  19  FREE_ENERGY
-17.70  LEN_BP_RATIO  2.78947368421053
UGCAUAUGUCACAGGUCCUUUGUCCACUGCGCUGGAGAAACUAUUUGGAGGACAGGGACUGCAA
AUCUG
>random_seq_from_cds__NO_159  RANDOM_LENGTH 90  SEQ_LENGTH  71
  GC_CONTENT  0.577464788732394  BASEPAIR  24  FREE_ENERGY
-30.30  LEN_BP_RATIO  2.958333333333333
UCACGGCCUUGGCGAUCCUCUUUGGGUUGGUCACUGUGAGAUCAUCCCCACUACCUGGAUCCU
GCACUGGCUGUGAACUUCUGCCAAG
>random_seq_from_cds__NO_187  RANDOM_LENGTH 77  SEQ_LENGTH  58
  GC_CONTENT  0.551724137931034  BASEPAIR  22  FREE_ENERGY
-20.90  LEN_BP_RATIO  2.63636363636364
ACGGCCAUGACACUGUCCUUGUGCUCUCGCAGCACCUCCAUCACUGUGUGGAUGUGAUUCUGUA
GUUGCCAUCCAG
>random_seq_from_cds__NO_196  RANDOM_LENGTH 97  SEQ_LENGTH  76
  GC_CONTENT  0.565789473684211  BASEPAIR  28  FREE_ENERGY
-35.40  LEN_BP_RATIO  2.71428571428571
UGCAAAGACGGUGCUAUGGACUGAAUGCGAAUGAUUGGCUGGUUGGGGUCAUAUGUCCUGGCAC
AGCCAAUUC AAGGUCCCGGCACAUCAGAAGUU
>random_seq_from_cds__NO_197  RANDOM_LENGTH 70  SEQ_LENGTH  56
  GC_CONTENT  0.517857142857143  BASEPAIR  21  FREE_ENERGY
-18.80  LEN_BP_RATIO  2.66666666666667
UUGGGGAAACAUUUGCAGCUCUAAGGAUGUGAGCCUGAGGCAGCUGCUUUGAGAUUCGUCGGAA
CACAU
>random_seq_from_cds__NO_198  RANDOM_LENGTH 84  SEQ_LENGTH  78
  GC_CONTENT  0.487179487179487  BASEPAIR  31  FREE_ENERGY
-28.00  LEN_BP_RATIO  2.51612903225806
GAUAAUAGAGGUCCAGGCUUGGGUGAGGUCCUUGACAUCCUGAUUUAUGUACUCCUGGCAC
CACUCUUGGGCCUCCAUA
>random_seq_from_cds__NO_204  RANDOM_LENGTH 68  SEQ_LENGTH  46
  GC_CONTENT  0.5 BASEPAIR  20  FREE_ENERGY  -20.12  LEN_BP_RATIO
  2.3
UAGCCAGGUAUCAUUCUGGAUGGCUUUCACCCCUCCACUAAGGCCUCAUUGACAUCUGGCCAGU
```

GAC

```
>random_seq_from_cds__NO_207  RANDOM_LENGTH 80  SEQ_LENGTH 74
  GC_CONTENT 0.716216216216216  BASEPAIR 24  FREE_ENERGY
-31.00 LEN_BP_RATIO 3.083333333333333
CCCUCGGUGCUGGCAGUGGGUGGCAGUGGCGGCCGUGGUGGCGGCAGUGGUGGCGUUGGUGAU
GUUGGCCCCGCUGGC
>random_seq_from_cds__NO_219  RANDOM_LENGTH 82  SEQ_LENGTH 74
  GC_CONTENT 0.581081081081081  BASEPAIR 22  FREE_ENERGY
-26.45 LEN_BP_RATIO 3.363636363636363
UUGGCUUGGGUCUCAUCAUUAACCAGGGUCCACUUUUCACAGCACUGCUGGUGGAGUUGACCCC
AUUCCCCAAGGCCUCG
>random_seq_from_cds__NO_222  RANDOM_LENGTH 78  SEQ_LENGTH 64
  GC_CONTENT 0.578125  BASEPAIR 22  FREE_ENERGY -28.20
  LEN_BP_RATIO 2.90909090909091
CCGGCCGUGCCUCCGGCUGCUGUAGCUUAUUUAUUAUGCCUGAUGAGAGAUUCUAGAAUGGCAG
GGGUGGGGCCUUU
>random_seq_from_cds__NO_239  RANDOM_LENGTH 90  SEQ_LENGTH 72
  GC_CONTENT 0.458333333333333  BASEPAIR 29  FREE_ENERGY
-26.90 LEN_BP_RATIO 2.48275862068966
GGUAGAACUCAUCCAGAGGCAAGUUUCCAUUGUUGACCAGCAUUUCACUAGUGCUAUAGUCAGCA
GGAAUCCUGACUUGACUUGGAUUCU
>random_seq_from_cds__NO_242  RANDOM_LENGTH 87  SEQ_LENGTH 75
  GC_CONTENT 0.586666666666667  BASEPAIR 27  FREE_ENERGY
-29.50 LEN_BP_RATIO 2.77777777777778
AAGUAGGGUACUUCUGUAGGGUCUACUACAUAAGCCAGUGCUGGCCACCAACUGUCCCAGGGUC
CACAGAGCCACCCUGCCUUUUG
>random_seq_from_cds__NO_256  RANDOM_LENGTH 82  SEQ_LENGTH 62
  GC_CONTENT 0.564516129032258  BASEPAIR 23  FREE_ENERGY
-21.14 LEN_BP_RATIO 2.69565217391304
UUGCUCGAGCCAGCAUGCUGAUGCAAGUGAAGACUGUGGCAUCCACCUGCAUUGCCUUCUGCCUC
CUUAUGGGCGAAGUCCU
>random_seq_from_cds__NO_261  RANDOM_LENGTH 84  SEQ_LENGTH 68
  GC_CONTENT 0.617647058823529  BASEPAIR 28  FREE_ENERGY
-36.80 LEN_BP_RATIO 2.42857142857143
CCGGCUCUCCACCAGGGUGGACUAGCUGGACUGGGGGAGGUCCCAAUCCAUAGAGGCCUUGGU
GAGAGCUGUACCCCAGCAG
>random_seq_from_cds__NO_275  RANDOM_LENGTH 110 SEQ_LENGTH 99
  GC_CONTENT 0.686868686868687  BASEPAIR 35  FREE_ENERGY
-45.30 LEN_BP_RATIO 2.82857142857143
GCUCGAAGCGGACGAAGCGGACGCCCGGCCCGUAGUCGGUGAAGGUGUGGGAGAUCUCAUCA
GCCCCCGCCGUCACUGUCUUGGGGCACUGCCACCUGCCCGCUGCU
>random_seq_from_cds__NO_280  RANDOM_LENGTH 73  SEQ_LENGTH 60
  GC_CONTENT 0.6  BASEPAIR 21  FREE_ENERGY -19.10  LEN_BP_RATIO
2.85714285714286
```

GCCUCCAAGUCCUCCUCCCCACACGGGUUACGCAGAAGGUUGCGGCGCCGCUUGCUCAGGAAG  
UAGAACUG

>random\_seq\_from\_cds\_\_NO\_289 RANDOM\_LENGTH 97 SEQ\_LENGTH 83  
GC\_CONTENT 0.590361445783133 BASEPAIR 28 FREE\_ENERGY  
-34.00 LEN\_BP\_RATIO 2.96428571428571

UUUUGUCACAUCUACGAGAAUGUGCCUCAAGUCCAGCUGGUGGACCUUGUAGCCGAGGGCUAC  
UGGGAGGAGCUACUAGACACAUCCGGCCGGA

>random\_seq\_from\_cds\_\_NO\_292 RANDOM\_LENGTH 78 SEQ\_LENGTH 56  
GC\_CONTENT 0.660714285714286 BASEPAIR 19 FREE\_ENERGY  
-23.30 LEN\_BP\_RATIO 2.94736842105263

CCUCUCCAGCAUGGGGGCAGGGACACCCAGUACUGGGCAGGCUGGUAUGGGCCCCGAGUCACCA  
ACAGCAGCAUUGU

>random\_seq\_from\_cds\_\_NO\_310 RANDOM\_LENGTH 89 SEQ\_LENGTH 84  
GC\_CONTENT 0.630952380952381 BASEPAIR 27 FREE\_ENERGY  
-35.40 LEN\_BP\_RATIO 3.11111111111111

UCCCAAUGGGCCCCAGCCCCCAGCUGAAGGGAGCACUGGCGACUUCGCUCUCCAGUUGGGACU  
GAUUGUGGGUGUGACAGCCUUGG

>random\_seq\_from\_cds\_\_NO\_318 RANDOM\_LENGTH 77 SEQ\_LENGTH 60  
GC\_CONTENT 0.516666666666667 BASEPAIR 21 FREE\_ENERGY  
-20.70 LEN\_BP\_RATIO 2.85714285714286

UGGCCGUGGAAAGUGUCAAAAUUCUCCCAAGAGGGGAUCUGAAGGAGGAGUGGCUGCCUUG  
UGGAUUUUGUGG

>random\_seq\_from\_cds\_\_NO\_336 RANDOM\_LENGTH 97 SEQ\_LENGTH 82  
GC\_CONTENT 0.475609756097561 BASEPAIR 25 FREE\_ENERGY  
-20.92 LEN\_BP\_RATIO 3.28

UUUGACCGCUAAAAGGCAUGGCCUGGUUCUCUACAAUGAAAUUGAAUAUGCACAAGCAGCUGU  
AAAAGAGACCAAAGGGAGGAAAUCGGUGGGA

>random\_seq\_from\_cds\_\_NO\_349 RANDOM\_LENGTH 71 SEQ\_LENGTH 57  
GC\_CONTENT 0.491228070175439 BASEPAIR 19 FREE\_ENERGY  
-16.30 LEN\_BP\_RATIO 3

CUGCCUGGACCAGAAACUUCAGGUCUCUCAGACGGAGCCUGCAAAAUCUGACUUGUCUAAACUG  
GAAUCA

>random\_seq\_from\_cds\_\_NO\_351 RANDOM\_LENGTH 99 SEQ\_LENGTH 78  
GC\_CONTENT 0.576923076923077 BASEPAIR 28 FREE\_ENERGY  
-27.70 LEN\_BP\_RATIO 2.78571428571429

AGGAAGCACCUCAAGCCUGAGCAGCCUGCAGAUGGGGUAAGUGCUGUGGAUCUGGAGAAGCUGGA  
AGCCAGGAAAAGGCGCUUUGCAGAUCCAAUUUA

>random\_seq\_from\_cds\_\_NO\_398 RANDOM\_LENGTH 110 SEQ\_LENGTH 79  
GC\_CONTENT 0.443037974683544 BASEPAIR 26 FREE\_ENERGY  
-17.40 LEN\_BP\_RATIO 3.03846153846154

CCAUCCACUCCUCCUCAGUCAUGUACUUCUGACCUAAGCAAGAUUCCCUCCACAGAGAAUUCGU  
CCCAAGAAAUCAGUGUUGAGGAAAGGACUCCAACCAAAGCAUCUG

>random\_seq\_from\_cds\_\_NO\_410 RANDOM\_LENGTH 82 SEQ\_LENGTH 71  
GC\_CONTENT 0.633802816901408 BASEPAIR 28 FREE\_ENERGY

---

-38.70 LEN\_BP\_RATIO 2.53571428571429  
CGGGUGCGGUUACUGCUGCAUCUGGUGGUGUAACGGCCACAACAGGCACGGUGACAAUGGCAGGG  
GCAGUGAUUGCGCCGUC  
>random\_seq\_from\_cds\_\_NO\_424 RANDOM\_LENGTH 80 SEQ\_LENGTH 66  
GC\_CONTENT 0.590909090909091 BASEPAIR 23 FREE\_ENERGY  
-26.90 LEN\_BP\_RATIO 2.8695652173913  
UCGCUCGAGCCACAGCCCCUGUGCAGUCAGAGGUACUAGUCAUGCAGUCUGAGUACCGACUGCAC  
CCCUAUACUGUGCCA  
>random\_seq\_from\_cds\_\_NO\_440 RANDOM\_LENGTH 110 SEQ\_LENGTH 87  
GC\_CONTENT 0.586206896551724 BASEPAIR 21 FREE\_ENERGY  
-17.38 LEN\_BP\_RATIO 4.14285714285714  
CAGAUCUCCCCGCCUGUGAGUUCUCUGAGAGUCACCUGUCCCGCCUGGCCCCUGACCUCCUUGC  
CAGCAUCUCCAACAUCUCUCCCCACCUCAUGAUUGUCAUUGCCUC  
>random\_seq\_from\_cds\_\_NO\_441 RANDOM\_LENGTH 87 SEQ\_LENGTH 74  
GC\_CONTENT 0.662162162162162 BASEPAIR 27 FREE\_ENERGY  
-34.90 LEN\_BP\_RATIO 2.74074074074074  
CGUGUGAGAUGGAGGAGUUUGUGGGGUCGUGAAGGCUCUCAGGGAACCCUGUGACUCUGCAG  
GAGCUGUGGGGCCCCUGUCCCC  
>random\_seq\_from\_cds\_\_NO\_450 RANDOM\_LENGTH 119 SEQ\_LENGTH 93  
GC\_CONTENT 0.602150537634409 BASEPAIR 34 FREE\_ENERGY  
-37.60 LEN\_BP\_RATIO 2.73529411764706  
AGACCAGUUUCCGGGUGGACGUUCCCUUCGACCUGCCUGAGAUCUUCUUUUUUGUGGCGCUGGGG  
GGGUCUCUGUGGCAUCCUGGGCAGCGCUUACCUCUUCUGUCAGCGAAUCUUCUU  
>random\_seq\_from\_cds\_\_NO\_468 RANDOM\_LENGTH 110 SEQ\_LENGTH 88  
GC\_CONTENT 0.443181818181818 BASEPAIR 33 FREE\_ENERGY  
-29.60 LEN\_BP\_RATIO 2.66666666666667  
AGUUUCUCACGCUCUUCUAUGGACUGCAGAUACUGCUGCUUGCCUUCUGAGAUUCAUCCUUCUU  
CUUCAAAUAAGGCUCAUUGGAUUUGUACUGUGCAUAGAAGUUGCU  
>random\_seq\_from\_cds\_\_NO\_481 RANDOM\_LENGTH 75 SEQ\_LENGTH 62  
GC\_CONTENT 0.596774193548387 BASEPAIR 21 FREE\_ENERGY  
-20.50 LEN\_BP\_RATIO 2.95238095238095  
GGUCCCAAGUGGCCUCUCACUACCUGAUGGUCCCCGGUGGAAAGCACAACAUGGACUUCUACGU  
GGAGGCCUC  
>random\_seq\_from\_cds\_\_NO\_487 RANDOM\_LENGTH 86 SEQ\_LENGTH 58  
GC\_CONTENT 0.672413793103448 BASEPAIR 21 FREE\_ENERGY  
-27.10 LEN\_BP\_RATIO 2.76190476190476  
UGGGAACCUUGAAGUGAGCCCCCAGUCACAGUCAGGGGCAAGGAUACCCGUGGGCAGGAUUC  
UCUUCGGGGACAGCUGUUAUC  
>random\_seq\_from\_cds\_\_NO\_489 RANDOM\_LENGTH 77 SEQ\_LENGTH 54  
GC\_CONTENT 0.537037037037037 BASEPAIR 19 FREE\_ENERGY  
-18.90 LEN\_BP\_RATIO 2.84210526315789  
CCCUGUGAAGCUCUAUUCUGACUGGCUGUCCGUGGGCCACGUGGACGAGUUCUGAGCUUUGUGC  
CAGCACCCGACA  
>random\_seq\_from\_cds\_\_NO\_501 RANDOM\_LENGTH 81 SEQ\_LENGTH 55



---

```
GC_CONTENT    0.672727272727273    BASEPAIR    23    FREE_ENERGY
-33.70    LEN_BP_RATIO    2.39130434782609
UCAGGCAGCUGGGCCUGCCCACCGCCUCAAGAGAGGGUGUGGGUGACUCUGCUGUCUGACUACGA
GGUGUGCAAGGAGGGC
>random_seq_from_cds__NO_502    RANDOM_LENGTH    87    SEQ_LENGTH    71
GC_CONTENT    0.549295774647887    BASEPAIR    22    FREE_ENERGY
-20.22    LEN_BP_RATIO    3.22727272727273
GAUGUGCUGACCCCAGAGCAGGCUCGCGUCCUGGAAGCUUUUUGGGUAUGAGAUGGCUGAAUUCA
AGGUGACCAUCAAUAUCAUGUG
>random_seq_from_cds__NO_509    RANDOM_LENGTH    89    SEQ_LENGTH    76
GC_CONTENT    0.460526315789474    BASEPAIR    27    FREE_ENERGY
-18.20    LEN_BP_RATIO    2.81481481481481
UCCAGCAAAGCCAUGAUCCAGAUCCCAGAGGUAGACAGAUGAGACGCCACCUUCAAUUUACCAGG
UCUCGAUACUGGUCAAAGGCAUUG
>random_seq_from_cds__NO_512    RANDOM_LENGTH    84    SEQ_LENGTH    70
GC_CONTENT    0.514285714285714    BASEPAIR    27    FREE_ENERGY
-23.40    LEN_BP_RATIO    2.59259259259259
CUGGUCAACAGAAGACAGGAGAUCUCACAUAGACUGGGGACCCAGGUCGAUCAGGUCGCUGAGG
UUUUUCUGGAUUUGCUGGG
>random_seq_from_cds__NO_516    RANDOM_LENGTH    75    SEQ_LENGTH    49
GC_CONTENT    0.673469387755102    BASEPAIR    19    FREE_ENERGY
-24.80    LEN_BP_RATIO    2.57894736842105
CCUGGGGAGGAGACCAGGCUGGAGAUGGACAAGUUCUUUUUCUGGGCCUCUCCAAGGACGUACA
ACACCAAUGC
>random_seq_from_cds__NO_521    RANDOM_LENGTH    110    SEQ_LENGTH    80
GC_CONTENT    0.5625    BASEPAIR    24    FREE_ENERGY    -27.80
LEN_BP_RATIO    3.33333333333333
AAGAAUAAAACUGAUGUGGAGUAUGAGAGUGACGAGAAAGCCAGGGGCACGAGGCUGGACGGCCU
GGACCUCGUUGACACCUGGAAGAGCUUCAAACCGAGAUACAAGGC
>random_seq_from_cds__NO_522    RANDOM_LENGTH    110    SEQ_LENGTH    95
GC_CONTENT    0.568421052631579    BASEPAIR    34    FREE_ENERGY
-30.50    LEN_BP_RATIO    2.79411764705882
ACUCCCACUUCUUGGAACCGCACGGAACUCCUGACCCUUGACCCCAAAUGUGGACUACCUA
UUGGGGUCUCUUCGAGCCAGGGACAUGCAGUACGAGCUGAACAG
>random_seq_from_cds__NO_529    RANDOM_LENGTH    84    SEQ_LENGTH    78
GC_CONTENT    0.705128205128205    BASEPAIR    28    FREE_ENERGY
-33.90    LEN_BP_RATIO    2.78571428571429
GGCCCAUGGCGCACCUGCUGCACGGCGUCCACGAGCAGAAUACGUCCCCACGUGAUGGCGUA
UGCAGCCUGCAUCGGGGCC
>random_seq_from_cds__NO_551    RANDOM_LENGTH    86    SEQ_LENGTH    47
GC_CONTENT    0.74468085106383    BASEPAIR    19    FREE_ENERGY
-31.60    LEN_BP_RATIO    2.47368421052632
UGGAGGUGGUGUCUUUUUUUUUGGUGGUGGUGGAGCACCUCGCCUUUUUUUUUCCUCCUCCUC
UUCUUCUUCUACUGCAUAGCCA
```

---

>random\_seq\_from\_cds\_\_NO\_553 RANDOM\_LENGTH 86 SEQ\_LENGTH 59  
GC\_CONTENT 0.711864406779661 BASEPAIR 21 FREE\_ENERGY  
-27.30 LEN\_BP\_RATIO 2.80952380952381  
UAUCCACCUCUCCCCCACCACGACCCCGACCUCUAAUUGGAGGUGGCAUGCGAGGAGGAGGGUG  
GUAGUAAUAAUCUUCUACCG

>random\_seq\_from\_cds\_\_NO\_567 RANDOM\_LENGTH 84 SEQ\_LENGTH 67  
GC\_CONTENT 0.477611940298507 BASEPAIR 19 FREE\_ENERGY  
-17.60 LEN\_BP\_RATIO 3.52631578947368  
GUCUGAAAUAUUUCAAGUCUUCUGCCACCUUCUGUGGGAGGCCUGCCUCUAUCAGUGUCUU  
GUAGUGUUCUGUGUGAGUU

>random\_seq\_from\_cds\_\_NO\_578 RANDOM\_LENGTH 71 SEQ\_LENGTH 65  
GC\_CONTENT 0.523076923076923 BASEPAIR 23 FREE\_ENERGY  
-18.30 LEN\_BP\_RATIO 2.82608695652174  
CUGGGGUUGGGAAAACAGUAAAUAGCUUGCGAAAACACGAGCAUGUUGGAAGCUUUGCCAGGGAC  
CUAGUG

>random\_seq\_from\_cds\_\_NO\_595 RANDOM\_LENGTH 90 SEQ\_LENGTH 63  
GC\_CONTENT 0.492063492063492 BASEPAIR 22 FREE\_ENERGY  
-18.10 LEN\_BP\_RATIO 2.86363636363636  
CCCUAAAAUGAUGACCUUGCACCAGCAAUGCAUCCGAGUACUAAAAACAACAUCGAUUGCAAUC  
UUUGAAGUGGGAGGAGUCCCAUACU

>random\_seq\_from\_cds\_\_NO\_605 RANDOM\_LENGTH 88 SEQ\_LENGTH 75  
GC\_CONTENT 0.613333333333333 BASEPAIR 26 FREE\_ENERGY  
-27.10 LEN\_BP\_RATIO 2.88461538461538  
UCUGUCCCCAUGCGCCUAGGAUCCUGUGACCCUCAACAUGAAGAUGGUGAUGCCCUCCUGGGU  
UUGACCUGAUGGGGCUGAGUCCA

>random\_seq\_from\_cds\_\_NO\_611 RANDOM\_LENGTH 73 SEQ\_LENGTH 64  
GC\_CONTENT 0.578125 BASEPAIR 19 FREE\_ENERGY -27.74  
LEN\_BP\_RATIO 3.36842105263158  
GCUCCUGUCCUCAGGGAGAUGGCAGCUGUGAAGGAAUUUCUUGAGAAGCUGCUGCCUCCUGUCUA  
ACUCAGGC

>random\_seq\_from\_cds\_\_NO\_620 RANDOM\_LENGTH 78 SEQ\_LENGTH 65  
GC\_CONTENT 0.584615384615385 BASEPAIR 21 FREE\_ENERGY  
-20.20 LEN\_BP\_RATIO 3.0952380952381  
ACACCAGGUUCUUCACCCCGUGGGCCUUCGAUCCUCCAGAAGCUGGAUGGUCCCGUCAGGUU  
AACUCUGUAAUAA

>random\_seq\_from\_cds\_\_NO\_626 RANDOM\_LENGTH 80 SEQ\_LENGTH 68  
GC\_CONTENT 0.470588235294118 BASEPAIR 23 FREE\_ENERGY  
-19.20 LEN\_BP\_RATIO 2.95652173913043  
AGGCUCUUCAUUGAUUCUUGGCUCAAGGAGUUGUAUUUAGUGUGACGACUGUUGACCUGAAAAG  
GGAAGCCAGCAGACC

>random\_seq\_from\_cds\_\_NO\_639 RANDOM\_LENGTH 71 SEQ\_LENGTH 49  
GC\_CONTENT 0.63265306122449 BASEPAIR 19 FREE\_ENERGY  
-20.80 LEN\_BP\_RATIO 2.57894736842105  
AGCGGCACAGAGCAGGAUGACCUCUUCAGCUUCUGACCUACAGGCUGGACAGAUGGUGGGGGGCC

```
CCUGGG
>random_seq_from_cds__NO_659  RANDOM_LENGTH 75  SEQ_LENGTH  59
  GC_CONTENT  0.610169491525424  BASEPAIR  19  FREE_ENERGY
  -23.50  LEN_BP_RATIO  3.10526315789474
UCCUGAGGAUCGUGCAGCCACGUGGCUGGGAUCUGCCACAACAUCUGGUCUGCUGCCCAAGGA
GCUGCUGGAA
>random_seq_from_cds__NO_661  RANDOM_LENGTH 87  SEQ_LENGTH  80
  GC_CONTENT  0.625  BASEPAIR  28  FREE_ENERGY  -35.10
  LEN_BP_RATIO  2.85714285714286
ACCCAGGGUCCCCACUGACUCCCGACUGCAGAUCAGCCUGGAGACGAGGUUGUCCAGAUCAACG
AGCAGGUGGUGGGUGGGAUGGC
>random_seq_from_cds__NO_669  RANDOM_LENGTH 70  SEQ_LENGTH  58
  GC_CONTENT  0.517241379310345  BASEPAIR  21  FREE_ENERGY
  -16.60  LEN_BP_RATIO  2.76190476190476
CCAUGAUGUGUACAAACCCUUCAUCUUCGUCUGAUACCCUGACAGAUCUGAGCAUGGUGGGUG
CGUCA
>random_seq_from_cds__NO_673  RANDOM_LENGTH 110 SEQ_LENGTH  99
  GC_CONTENT  0.626262626262626  BASEPAIR  35  FREE_ENERGY
  -45.00  LEN_BP_RATIO  2.82857142857143
CAGUGAAGAGGCACUGGAAGGAAUGGUACGGGGCUGAGGCAGGGUGGCGUGUCCCUAGGCC
AGCCACAGCCCUGACCCAGGAACAGUGGCGGAGCUCUUUCAUGC
>random_seq_from_cds__NO_675  RANDOM_LENGTH 110 SEQ_LENGTH  97
  GC_CONTENT  0.618556701030928  BASEPAIR  32  FREE_ENERGY
  -39.00  LEN_BP_RATIO  3.03125
CUGCAGGUCCUAGAAGAAGUGCUGGGUGACCCUGAGCUGACAGGAGAGAAGUUCGCCAGUGGAA
GGAGCAGAACCGGGAGCUGUACUCAGAGGGCCUGGGGGCCUGGGG
>random_seq_from_cds__NO_682  RANDOM_LENGTH 84  SEQ_LENGTH  72
  GC_CONTENT  0.5694444444444444  BASEPAIR  26  FREE_ENERGY
  -21.71  LEN_BP_RATIO  2.76923076923077
CAUGGAGCCUUGUGGAGGGGUGCUGGCUGGUUCCGGUUUUUAUGGAUGAGAAAUUGGAGAGGUUGA
UUAGGGCUGAGGGGCCAAA
>random_seq_from_cds__NO_698  RANDOM_LENGTH 72  SEQ_LENGTH  64
  GC_CONTENT  0.765625  BASEPAIR  24  FREE_ENERGY  -32.00
  LEN_BP_RATIO  2.666666666666667
CCAGGUCUGUGGGCCGCGUCCGGCAGAGAUGGCCUCUGGACUGGGGGGCGAGGCCAGGGCUGCA
CAGGGCC
>random_seq_from_cds__NO_710  RANDOM_LENGTH 73  SEQ_LENGTH  67
  GC_CONTENT  0.656716417910448  BASEPAIR  20  FREE_ENERGY
  -20.90  LEN_BP_RATIO  3.35
GACCGCUGGUAUGCCAUCUGCCACCCACUAUUGUUAAGAGCACAGCCCGGCGGGCCCGUGGCUC
CAUCCUGG
>random_seq_from_cds__NO_713  RANDOM_LENGTH 80  SEQ_LENGTH  62
  GC_CONTENT  0.645161290322581  BASEPAIR  21  FREE_ENERGY
  -27.10  LEN_BP_RATIO  2.95238095238095
```

---

ACUGGGCCUCAUGGCCAUGGCCUAUUUCCAGAUUAUUCGCAAGCUCUGGGGCCGCCAGGAUCCCC  
GGCACCACCUCAGCA

>random\_seq\_from\_cds\_\_NO\_714 RANDOM\_LENGTH 84 SEQ\_LENGTH 75  
GC\_CONTENT 0.7333333333333333 BASEPAIR 27 FREE\_ENERGY  
-38.60 LEN\_BP\_RATIO 2.777777777777778  
CUGGUGCGGAACUGGAAGCGCCCCUCAGACCAGCUGGGGGACCUGGAGCAGGGCCUGAGUGGAGA  
GCCCCAGCCCCGGGCCCGC

>random\_seq\_from\_cds\_\_NO\_716 RANDOM\_LENGTH 85 SEQ\_LENGTH 78  
GC\_CONTENT 0.628205128205128 BASEPAIR 25 FREE\_ENERGY  
-24.92 LEN\_BP\_RATIO 3.12  
UUCGCCUCUGCUACCUGCCCAUCAGCGUCCUCA AUGUCCUUAAGAGGGGUGUUCGGGAUGUUC  
GCCAAGCCAGUGACCGCGAA

>random\_seq\_from\_cds\_\_NO\_717 RANDOM\_LENGTH 110 SEQ\_LENGTH 87  
GC\_CONTENT 0.586206896551724 BASEPAIR 22 FREE\_ENERGY  
-25.64 LEN\_BP\_RATIO 3.95454545454545  
GCUGUCUACGCCUGCUUACCUUCUCCCACUGGCUGGUGUACGCCAACAGCGCUGCCAACCCCAU  
CAUCUACAACUCCUCAGUGGGCAAUUCGGGAGCAGUUUAAGG

>random\_seq\_from\_cds\_\_NO\_720 RANDOM\_LENGTH 64 SEQ\_LENGTH 52  
GC\_CONTENT 0.596153846153846 BASEPAIR 20 FREE\_ENERGY  
-19.00 LEN\_BP\_RATIO 2.6  
AUGGGUGGGUACUGCUGCUCCAUCGGCAUGGCCCAAAGCAGUCAGAGGGAUUACAGUGGCCAG

>random\_seq\_from\_cds\_\_NO\_723 RANDOM\_LENGTH 110 SEQ\_LENGTH 89  
GC\_CONTENT 0.685393258426966 BASEPAIR 30 FREE\_ENERGY  
-42.70 LEN\_BP\_RATIO 2.966666666666667  
AAGCCUGCCGUCCUUCUCUGCCAAUCUGACCAGGGAGCCCAGGUGACCCUGGAGCACCUGGCCU  
GCCCCGAGCACCAUCCUCCUGGAGGCCUGGUCGUCCCGGAGC

>random\_seq\_from\_cds\_\_NO\_725 RANDOM\_LENGTH 90 SEQ\_LENGTH 65  
GC\_CONTENT 0.723076923076923 BASEPAIR 21 FREE\_ENERGY  
-28.90 LEN\_BP\_RATIO 3.0952380952381  
GAUUUCAUCAUAUUCACCAUGUCUCCCAUGGAGCCAGGCACACCAGGCAAGCCAGGGCUCCCC  
GAAGGCCCGGAGCUCCAGGGUGGC

>random\_seq\_from\_cds\_\_NO\_728 RANDOM\_LENGTH 84 SEQ\_LENGTH 77  
GC\_CONTENT 0.714285714285714 BASEPAIR 30 FREE\_ENERGY  
-43.70 LEN\_BP\_RATIO 2.566666666666667  
CCCCUCUUUGCCAGCUGCACCAUCCGUACCAGGUUCGCCUUGGGGGCCAGGGUGUCCAGGGGGG  
CCGGGCUGGCCUGGGAGGC

>random\_seq\_from\_cds\_\_NO\_739 RANDOM\_LENGTH 78 SEQ\_LENGTH 63  
GC\_CONTENT 0.698412698412698 BASEPAIR 23 FREE\_ENERGY  
-30.80 LEN\_BP\_RATIO 2.73913043478261  
CCCGGAGGACCAGGUAGGCCUGGGCUCCCAACACAGCCAGGAUCUCCUCACUGUUGUCACCCCC  
GGGCCUCCUGGC

>random\_seq\_from\_cds\_\_NO\_763 RANDOM\_LENGTH 68 SEQ\_LENGTH 51  
GC\_CONTENT 0.705882352941177 BASEPAIR 19 FREE\_ENERGY  
-22.40 LEN\_BP\_RATIO 2.68421052631579

UGGACCAGGCAGGCCCGCUCACCCUJUUCCCUCCCCUUGGGGCCAGAGGGAGCAAGUGUGACCAUU  
GCU

>random\_seq\_from\_cds\_\_NO\_766 RANDOM\_LENGTH 73 SEQ\_LENGTH 59  
GC\_CONTENT 0.610169491525424 BASEPAIR 23 FREE\_ENERGY  
-22.70 LEN\_BP\_RATIO 2.56521739130435

UAGACCUUGCCUUCAGACUGUGGAUUGAUCUCAUUGAGCUCUUGCUCUGGGUGUCCCGGCGGGC  
CUUGGAGG

>random\_seq\_from\_cds\_\_NO\_790 RANDOM\_LENGTH 99 SEQ\_LENGTH 81  
GC\_CONTENT 0.703703703703704 BASEPAIR 26 FREE\_ENERGY  
-38.00 LEN\_BP\_RATIO 3.11538461538462

GGACGGCAGACAUCAGGUGAGCGCCAGCAGGGGCAGCACCCACGCAGGAGCUCAGAGUGAGGCC  
CAUGGCGUCCUGGCCGAGGCUGAGCUGAGCAGG

>random\_seq\_from\_cds\_\_NO\_792 RANDOM\_LENGTH 80 SEQ\_LENGTH 62  
GC\_CONTENT 0.451612903225806 BASEPAIR 22 FREE\_ENERGY  
-19.70 LEN\_BP\_RATIO 2.81818181818182

CGGCCUCUGCUUCUUGGAUUUGUCGGAGAUGCCAUCACGUGCCAUGAGCUUGUUGAAGACGAUG  
AUUCCGAUGAGCAUG

>random\_seq\_from\_cds\_\_NO\_821 RANDOM\_LENGTH 70 SEQ\_LENGTH 59  
GC\_CONTENT 0.661016949152542 BASEPAIR 22 FREE\_ENERGY  
-26.20 LEN\_BP\_RATIO 2.68181818181818

CAGCCCGGGUCGCCCUGUCUGCGCAUGUAUAGCCAGGCUCAUCUGCAGACCUCGGCCACUG  
GGUUU

>random\_seq\_from\_cds\_\_NO\_830 RANDOM\_LENGTH 85 SEQ\_LENGTH 60  
GC\_CONTENT 0.783333333333333 BASEPAIR 21 FREE\_ENERGY  
-32.80 LEN\_BP\_RATIO 2.85714285714286

CGAGAAGGCCCGUAGAGCACACCCGAGGCCAGGGCAGAGCAGGCACUGGGGGCGGGGUCGAAGG  
CGGUGGCCAGGCGCAGGGAC

>random\_seq\_from\_cds\_\_NO\_834 RANDOM\_LENGTH 102 SEQ\_LENGTH 89  
GC\_CONTENT 0.471910112359551 BASEPAIR 32 FREE\_ENERGY  
-26.60 LEN\_BP\_RATIO 2.78125

UCUUAUGUGAGCUCUACCACUGGGGGAGAGUGUGAUCACAAGAGAGAUGGUGGAGAUGCUCUUUU  
CUGAUGAUUCUGACCUGCAGUUAGCAACCACACAGAA

>random\_seq\_from\_cds\_\_NO\_848 RANDOM\_LENGTH 100 SEQ\_LENGTH 87  
GC\_CONTENT 0.551724137931034 BASEPAIR 26 FREE\_ENERGY  
-20.60 LEN\_BP\_RATIO 3.34615384615385

CGAGAACCAGGAGAUUCUACCAGAAGGCCUUCGACCUCAUUGAGCACUACUUUGGUGUAGAAGACG  
AUGAUAGCAGCCUGGCUCCCAAGUCGAUGAAACG

>random\_seq\_from\_cds\_\_NO\_854 RANDOM\_LENGTH 83 SEQ\_LENGTH 57  
GC\_CONTENT 0.596491228070175 BASEPAIR 19 FREE\_ENERGY  
-20.90 LEN\_BP\_RATIO 3

GUGAAACUUAUAAGCAGCAGACGGACAUCGUGUGAAUUGGGCUGGGGGCCUGCACCAUGCAAA  
GAAGUCCGAGGCAUCUGG

>random\_seq\_from\_cds\_\_NO\_855 RANDOM\_LENGTH 88 SEQ\_LENGTH 62  
GC\_CONTENT 0.5 BASEPAIR 22 FREE\_ENERGY -19.80 LEN\_BP\_RATIO

2.81818181818182  
CUUCUGUUACGUCAAUGAUAUCGUCUUGGCCAUCCUGGAACUGCUAAAGGUAUCACCAGAGGGUG  
CUGUACAUGACAUGAUUAUUA  
>random\_seq\_from\_cds\_\_NO\_870 RANDOM\_LENGTH 89 SEQ\_LENGTH 81  
GC\_CONTENT 0.62962962962963 BASEPAIR 29 FREE\_ENERGY  
-32.50 LEN\_BP\_RATIO 2.79310344827586  
CCAAGGCCUCUUCGUCAGAUGGUUGAGGCCAUCCGCUACUGCCAUGGCUGUGGUGGGCCAC  
CGGGACCUCAAAUGUGAGAACGCC  
>random\_seq\_from\_cds\_\_NO\_872 RANDOM\_LENGTH 88 SEQ\_LENGTH 72  
GC\_CONTENT 0.611111111111111 BASEPAIR 25 FREE\_ENERGY  
-27.86 LEN\_BP\_RATIO 2.88  
GUACAGCCUAUGCUGCCCCGAGGUGCUGCAGGGCAUCCCCACGAUAGCAAAAAAGGUGAUGC  
UGGAGCAUGGGUGUGGUCCUGUA  
>random\_seq\_from\_cds\_\_NO\_881 RANDOM\_LENGTH 81 SEQ\_LENGTH 70  
GC\_CONTENT 0.5 BASEPAIR 24 FREE\_ENERGY -22.74 LEN\_BP\_RATIO  
2.91666666666667  
ACAUCUUCUAAACCAGGAUCCUUCUGGAGAGUGCAACCCAGACUUGCGUCUCCGUGGACAUCAG  
AAGGAAGGCUAUGGGC  
>random\_seq\_from\_cds\_\_NO\_884 RANDOM\_LENGTH 69 SEQ\_LENGTH 62  
GC\_CONTENT 0.451612903225806 BASEPAIR 21 FREE\_ENERGY  
-19.60 LEN\_BP\_RATIO 2.95238095238095  
CUGGCAUCUACUCCAUGAGUCUCUGUUUGGGUCAGUUGCUGAUGAUCAGAAACUUAUGAUGUUGG  
GAUA  
>random\_seq\_from\_cds\_\_NO\_885 RANDOM\_LENGTH 119 SEQ\_LENGTH 67  
GC\_CONTENT 0.477611940298507 BASEPAIR 23 FREE\_ENERGY  
-22.09 LEN\_BP\_RATIO 2.91304347826087  
CUCGUUCAACAUAUACUCCAACCAAGCCACUCAGUUGAUGCUCACACUGCUGAAGUGAACUGC  
CUUUCUUAUCCUUAUAGUGAGUUAUUCUUGCCACAGGAUCAGCUGACAAG  
>random\_seq\_from\_cds\_\_NO\_894 RANDOM\_LENGTH 109 SEQ\_LENGTH 93  
GC\_CONTENT 0.602150537634409 BASEPAIR 34 FREE\_ENERGY  
-34.70 LEN\_BP\_RATIO 2.73529411764706  
UUGACACCAACAGCGAUGGCACCAUAGACUUUCGGGAGUUCAUCAUUGCGCUGAGCGUGACCUCG  
CGCGGCCCGCUGGAGCAGAAGCUCUUGUGGGCCUUCAGCAUGUA  
>random\_seq\_from\_cds\_\_NO\_905 RANDOM\_LENGTH 82 SEQ\_LENGTH 72  
GC\_CONTENT 0.430555555555556 BASEPAIR 29 FREE\_ENERGY  
-21.70 LEN\_BP\_RATIO 2.48275862068966  
UAUCAUCUGUUUUGAGGUGCUUAGGUGAAGGAGAAGUCAUGAAAGAUGGACCCCUUUUCUUUACC  
CUGAGACUUAGACGAUU  
>random\_seq\_from\_cds\_\_NO\_906 RANDOM\_LENGTH 72 SEQ\_LENGTH 65  
GC\_CONTENT 0.492307692307692 BASEPAIR 19 FREE\_ENERGY  
-17.14 LEN\_BP\_RATIO 3.42105263157895  
CCUUUGCCGCCUCAGCCUUGACAGGAGAAAGUGUAUGAAAGACAAAGUUUCUUGAAUUUCGAGGA  
GCACUGG  
>random\_seq\_from\_cds\_\_NO\_907 RANDOM\_LENGTH 79 SEQ\_LENGTH 65

---

```
GC_CONTENT    0.553846153846154    BASEPAIR    22    FREE_ENERGY
-21.50    LEN_BP_RATIO    2.9545454545454545
GGUUAUGGUCAGAGAGAGCAGCCAGUUUCUGAAGCACAGCUUUGGGCUGGUUUAGCAGUGAGCCU
GUCUUCACCCUGUU
>random_seq_from_cds__NO_939    RANDOM_LENGTH    110    SEQ_LENGTH    94
GC_CONTENT    0.372340425531915    BASEPAIR    30    FREE_ENERGY
-18.50    LEN_BP_RATIO    3.1333333333333333
UUGUCUGCUCAGAACCUUUACUAUGGUGAUCACUGUUCAUUUCAGUAGUAUUUGCAGUGUCUAUG
AUUUCUUUGUGAUGGCUUGACUGAUUUUAGAUGACCUUCAUAG
>random_seq_from_cds__NO_946    RANDOM_LENGTH    85    SEQ_LENGTH    67
GC_CONTENT    0.432835820895522    BASEPAIR    25    FREE_ENERGY
-15.90    LEN_BP_RATIO    2.68
CUUUUAUCAUGUAUGUCUUUUUGGAACUCUUUCUGUCAGUGGUAAGUCUGUAGAGUUUCCAGAC
UGAAGACUCAGCUCUAAGCA
>random_seq_from_cds__NO_953    RANDOM_LENGTH    81    SEQ_LENGTH    63
GC_CONTENT    0.5555555555555556    BASEPAIR    23    FREE_ENERGY
-21.80    LEN_BP_RATIO    2.73913043478261
CUGGCCAAUUACUUUGAGGUGGACAUCCCUAAGAUCGACGUGUACCACUACGAGGUGGACAUCAA
GCCGGAUAAGUGUCCC
>random_seq_from_cds__NO_954    RANDOM_LENGTH    67    SEQ_LENGTH    52
GC_CONTENT    0.5    BASEPAIR    19    FREE_ENERGY    -16.20    LEN_BP_RATIO
2.73684210526316
CGUAGAGUCAACCGGGGAAGUGGUGGAAUACAUGGUCCAGCAUUUCAAGCCUCAGAUUUUGGUG
AU
>random_seq_from_cds__NO_980    RANDOM_LENGTH    110    SEQ_LENGTH    98
GC_CONTENT    0.612244897959184    BASEPAIR    34    FREE_ENERGY
-39.60    LEN_BP_RATIO    2.88235294117647
CACACGCUCUGUCUCUAUCCAGCACCUGCCUACUAUGCCCGCCUGGUGGCUUCCGGGCACGAU
ACCACCGUGGACAAGGAGCAUGACAGGUGGAGAGGGGAGCCAC
>random_seq_from_cds__NO_1004    RANDOM_LENGTH    80    SEQ_LENGTH    70
GC_CONTENT    0.628571428571429    BASEPAIR    27    FREE_ENERGY
-31.40    LEN_BP_RATIO    2.59259259259259
AUGGUGGUGGACUCCAUGAGCAGCGCGUAGUCGGCCGUCAGGGCCUCUGGAUGCCCUCCUCGUU
GUUCUUCACCAGCGC
>random_seq_from_cds__NO_1020    RANDOM_LENGTH    81    SEQ_LENGTH    73
GC_CONTENT    0.534246575342466    BASEPAIR    25    FREE_ENERGY
-19.41    LEN_BP_RATIO    2.92
GUUGUCCACAUUGAGAAUCCGGAAUCCUGUCAGGUUCACGCCUGAGUAGCGGUAGGGCUCCAGGU
CUAAAGCGUAGAGAUC
>random_seq_from_cds__NO_1023    RANDOM_LENGTH    71    SEQ_LENGTH    53
GC_CONTENT    0.566037735849057    BASEPAIR    19    FREE_ENERGY
-17.40    LEN_BP_RATIO    2.78947368421053
GGAGCUGACGGAUCUUCAGGCGGAUGUUGUAUCUUGAUGGGCCAUGAUGAGCUCCUGCAGUCGG
AUGAGC
```

---

```
>random_seq_from_cds__NO_1025 RANDOM_LENGTH 90 SEQ_LENGTH 64
  GC_CONTENT 0.640625 BASEPAIR 25 FREE_ENERGY -31.90
  LEN_BP_RATIO 2.56
UAGAGGUUCACGUAGAAGGUGUCCUUGUUGUCCAGCGGGUGGUGCUCCAACGCAGCUGGAUGUG
GGGCACCUCCAGGGCAUUGCAGAUG
>random_seq_from_cds__NO_1031 RANDOM_LENGTH 72 SEQ_LENGTH 57
  GC_CONTENT 0.385964912280702 BASEPAIR 21 FREE_ENERGY
  -16.80 LEN_BP_RATIO 2.71428571428571
AAGCUAAAUAUGCAGCAAUUGCUAUCCAAAACCUUGGAUCUUUCAGCAGUGCUUUUAUCAAAGCAG
CUAAACA
>random_seq_from_cds__NO_1057 RANDOM_LENGTH 96 SEQ_LENGTH 89
  GC_CONTENT 0.539325842696629 BASEPAIR 33 FREE_ENERGY
  -42.80 LEN_BP_RATIO 2.6969696969697
CGAGACUUGAAUCUGCCCACAAUACAUUUGCGGUCAUUGAGGAGCAUGCCAUUCAUCUUCUGA
UGGCCUUGUCGGCAGCCUCUUGGGUCUCGAA
>random_seq_from_cds__NO_1062 RANDOM_LENGTH 86 SEQ_LENGTH 73
  GC_CONTENT 0.63013698630137 BASEPAIR 24 FREE_ENERGY
  -35.84 LEN_BP_RATIO 3.04166666666667
CAGGUCGCCACGUACAGGGAGGCCAUGGGGUAGCUGCUGGCCGCAGCGUUCAUGAUGGCCACCA
CCAAGCGGUCUUGUACGUGG
>random_seq_from_cds__NO_1064 RANDOM_LENGTH 92 SEQ_LENGTH 69
  GC_CONTENT 0.420289855072464 BASEPAIR 26 FREE_ENERGY
  -24.10 LEN_BP_RATIO 2.65384615384615
CAUCACAGAUAAUUCAGAUUCCUCUGGAUUAUGAAACAGGAAAAGCACCGAGGAUUUGCUUUUGUU
GAAUUUGAGUUGGCAGAGGGGAUGCUGC
>random_seq_from_cds__NO_1106 RANDOM_LENGTH 88 SEQ_LENGTH 63
  GC_CONTENT 0.555555555555556 BASEPAIR 22 FREE_ENERGY
  -19.91 LEN_BP_RATIO 2.86363636363636
GCUUGGUGGAACCGUGGGGACAUAAGAAAGCAUGCCCUUUAUUGAGGCCUUCGUCAGUCCAUAU
UCAAGGUCAAAAGAGAGAACUUU
>random_seq_from_cds__NO_1112 RANDOM_LENGTH 89 SEQ_LENGTH 71
  GC_CONTENT 0.52112676056338 BASEPAIR 19 FREE_ENERGY
  -18.90 LEN_BP_RATIO 3.73684210526316
UGUCAUUAAGGCUCUGGAGCAUUCUGCACUGGCCAUCAACCACAAAUUGGAAAUCAAGGUACAUA
GAUUCUGCGGACUUGGAGCCCAUC
>random_seq_from_cds__NO_1114 RANDOM_LENGTH 78 SEQ_LENGTH 71
  GC_CONTENT 0.52112676056338 BASEPAIR 27 FREE_ENERGY
  -23.10 LEN_BP_RATIO 2.62962962962963
UCCAAGCAAUUGCCUGGGCUCGGAAUCAGAAAAGCCUUUUUUGGGGCGUGUGCUUAGGGAUGCA
GUUGGCAGUGGUU
>random_seq_from_cds__NO_1134 RANDOM_LENGTH 77 SEQ_LENGTH 55
  GC_CONTENT 0.6 BASEPAIR 21 FREE_ENERGY -26.30 LEN_BP_RATIO
  2.61904761904762
ACAGGAGGGGGCACCAGUGAUCGACACAUUCGCAUCUGGAAUGUGUGCUCUGGGGCCUGUCUGAG
```



```
UGCCGUGGAUGC
>random_seq_from_cds__NO_1143 RANDOM_LENGTH 85 SEQ_LENGTH 78
  GC_CONTENT 0.602564102564103 BASEPAIR 27 FREE_ENERGY
  -32.20 LEN_BP_RATIO 2.88888888888889
GUCUGCGUGGGCAUCGUGGGCAGUGGGCUGCCCUGGCCGAUGCUCAGAACCCCAGCCUCUUUGU
AAAGAUUCUCAUCGUGGAGA
>random_seq_from_cds__NO_1172 RANDOM_LENGTH 84 SEQ_LENGTH 75
  GC_CONTENT 0.44 BASEPAIR 24 FREE_ENERGY -19.10
  LEN_BP_RATIO 3.125
GGAUCAUCGAUGUUGUCUACAAUGCAUCUAAUAACGAGCUGGUUCGUACCAAGACCCUGGUGAAG
AAUUGCAUCGUGCUCAUCG
>random_seq_from_cds__NO_1181 RANDOM_LENGTH 92 SEQ_LENGTH 83
  GC_CONTENT 0.686746987951807 BASEPAIR 28 FREE_ENERGY
  -38.90 LEN_BP_RATIO 2.96428571428571
CGGGGGCAAUGUGUGUCUCAAGGGCAUGGGCGGCCCGCAGGUCCGGCUGCCCUGGGUGGUCAGG
AAGCCCAGAGCCACGUGGACUGUGAA
>random_seq_from_cds__NO_1196 RANDOM_LENGTH 94 SEQ_LENGTH 76
  GC_CONTENT 0.644736842105263 BASEPAIR 25 FREE_ENERGY
  -36.90 LEN_BP_RATIO 3.04
UCAGAGCCCAGUGGGUCAGAAGGUGGGGCACCAGGUGGGCUUGGGGAGGCAGGAUGGUGACCAC
AUGCUGGCUGCUGGCUUCACAGUGGGUAA
>random_seq_from_cds__NO_1208 RANDOM_LENGTH 77 SEQ_LENGTH 70
  GC_CONTENT 0.685714285714286 BASEPAIR 23 FREE_ENERGY
  -28.70 LEN_BP_RATIO 3.04347826086957
GGAGCCCUGCCUGCUGUGAUGGUUGGGGGCACUAGGUGGGCAGUGGAGGUCAUCAGGGUGCAGAC
AGGGCCGCCCCA
>random_seq_from_cds__NO_1212 RANDOM_LENGTH 81 SEQ_LENGTH 74
  GC_CONTENT 0.554054054054054 BASEPAIR 31 FREE_ENERGY
  -30.50 LEN_BP_RATIO 2.38709677419355
UCCCAUAGAGUGAUACUUGGACUUUACUGGCAGUGAGGGCUGCCUGGAGGUGGAGGCCAAGUGCU
UCGGGUGUGAGGAUGU
>random_seq_from_cds__NO_1217 RANDOM_LENGTH 85 SEQ_LENGTH 75
  GC_CONTENT 0.56 BASEPAIR 25 FREE_ENERGY -23.80
  LEN_BP_RATIO 3
GCGGCGAUCGAGUCAUCAUGGAAGCGAAUGGGUUGGGGACCUCAGGGUUUUCGGAGCUGAAGAA
UGACACAUUCCUGCGAGCAG
>random_seq_from_cds__NO_1223 RANDOM_LENGTH 84 SEQ_LENGTH 67
  GC_CONTENT 0.597014925373134 BASEPAIR 24 FREE_ENERGY
  -28.60 LEN_BP_RATIO 2.79166666666667
GUUGAGGGUGGUGGCUCAAGCACCAUGGCUCAGGCCAAGCGCUGGCUCUAUCAGAGACCUCAGGC
UAGUCACCAGCUGCUUCGC
>random_seq_from_cds__NO_1243 RANDOM_LENGTH 67 SEQ_LENGTH 57
  GC_CONTENT 0.43859649122807 BASEPAIR 20 FREE_ENERGY
  -15.10 LEN_BP_RATIO 2.85
```

CCGAUGAAAAAUGCCUUUGAAGUGAAGGUAGCUGAGGCCACUGCUAUGUCAUAGGCCAGUUUUA  
CC

>random\_seq\_from\_cds\_\_NO\_1248 RANDOM\_LENGTH 102 SEQ\_LENGTH 90  
GC\_CONTENT 0.577777777777778 BASEPAIR 28 FREE\_ENERGY  
-32.30 LEN\_BP\_RATIO 3.21428571428571

UGGAGGAGGAGCUUGGCUCCAGCCAGCUGGCCAAGAGAAAACCUGAAGGCAGGUCCUGUGAUGA  
UGAAGACUGGCAACCUGGCCUAGUGGACUCCUAGGAA

>random\_seq\_from\_cds\_\_NO\_1251 RANDOM\_LENGTH 85 SEQ\_LENGTH 62  
GC\_CONTENT 0.725806451612903 BASEPAIR 19 FREE\_ENERGY  
-33.00 LEN\_BP\_RATIO 3.26315789473684

AGGGUCCUCUGGGCUCUCGAGCAUUGGGCCUGAAAAGGGCUGGGGUCCGCCGGGCCCUCCAUGAC  
CCCCUGGAAAAAGAUGCCUU

>random\_seq\_from\_cds\_\_NO\_1257 RANDOM\_LENGTH 81 SEQ\_LENGTH 66  
GC\_CONTENT 0.515151515151515 BASEPAIR 23 FREE\_ENERGY  
-20.90 LEN\_BP\_RATIO 2.8695652173913

GUCUUCUCCCAUCCUCAUCAUUCUUAUGAGACCUUCCGCCUUAUGUUGGAGUCCUCCAGAAAAG  
GAAGUGUUGGUCUGGU

>random\_seq\_from\_cds\_\_NO\_1265 RANDOM\_LENGTH 84 SEQ\_LENGTH 70  
GC\_CONTENT 0.585714285714286 BASEPAIR 26 FREE\_ENERGY  
-25.30 LEN\_BP\_RATIO 2.69230769230769

UCUAAGGCCUUGGAGCCCCAGCUGUCAGGGUAAGAUGCUGGUCCUGGAUUUAUUCUGGCGGUGA  
CCCGAAGCCGUAGCAGUGA

>random\_seq\_from\_cds\_\_NO\_1272 RANDOM\_LENGTH 72 SEQ\_LENGTH 60  
GC\_CONTENT 0.616666666666667 BASEPAIR 21 FREE\_ENERGY  
-22.30 LEN\_BP\_RATIO 2.85714285714286

CCGUCAGAUCCGGCCACCCCUGAUGGUUCUGACUGCACUUCAGACCUGGCAGGGUGGAACCACU  
GCACUGA

>random\_seq\_from\_cds\_\_NO\_1273 RANDOM\_LENGTH 77 SEQ\_LENGTH 57  
GC\_CONTENT 0.666666666666667 BASEPAIR 19 FREE\_ENERGY  
-26.80 LEN\_BP\_RATIO 3

UAAGUGGGGGCUCGGGAUGAGGUACUCCAGGCUGCCUGGGAUGCUGCCUCCACUGCCAUCACCU  
UCGUCUCCACC

>random\_seq\_from\_cds\_\_NO\_1275 RANDOM\_LENGTH 98 SEQ\_LENGTH 86  
GC\_CONTENT 0.813953488372093 BASEPAIR 37 FREE\_ENERGY  
-63.10 LEN\_BP\_RATIO 2.32432432432432

CCUGGCCUGCUGCUUCGUGGCGGCGGCCUGGCCUUGCGCUGGUCCGGGCGCCGGACGGCGCGGG  
GCGCGGUGGUCCGGGCGCGACAGAGGCAGCGAG

>random\_seq\_from\_cds\_\_NO\_1276 RANDOM\_LENGTH 86 SEQ\_LENGTH 62  
GC\_CONTENT 0.741935483870968 BASEPAIR 25 FREE\_ENERGY  
-46.00 LEN\_BP\_RATIO 2.48

CGGGCCUGGAGAACAUGGACAGGGCGGCGCAGCGCUUCCGGCUCCAGGAACCCAGACCUGGACUC  
AGAGGCGCUGCUAGCCCUGCC

>random\_seq\_from\_cds\_\_NO\_1280 RANDOM\_LENGTH 82 SEQ\_LENGTH 71  
GC\_CONTENT 0.704225352112676 BASEPAIR 24 FREE\_ENERGY

---

-30.90 LEN\_BP\_RATIO 2.9583333333333333  
UGAAGGGGUGCCGGCGGAGUGCGACAGCGUAGUGGUGCAUGUGCUGAAGCUGCAGGGUGCCGUGC  
CCUUCGUGCACACCAAU  
>random\_seq\_from\_cds\_\_NO\_1284 RANDOM\_LENGTH 71 SEQ\_LENGTH 56  
GC\_CONTENT 0.642857142857143 BASEPAIR 20 FREE\_ENERGY  
-21.20 LEN\_BP\_RATIO 2.8  
AGAGCCUGGCACUGUGCCUGCGAGCCUGCUGUGUGAGGACAUGUCCGCUUGGACCCACUGUG  
CCUCCC  
>random\_seq\_from\_cds\_\_NO\_1286 RANDOM\_LENGTH 87 SEQ\_LENGTH 74  
GC\_CONTENT 0.702702702702703 BASEPAIR 26 FREE\_ENERGY  
-33.70 LEN\_BP\_RATIO 2.84615384615385  
CUAUACCAUGCCCUCCCCGGCCAUGAGGCGGGCCGUGCUGGAGACCAAACAGAGCCUUGAGGCUG  
CGGGGCACACGGCUGGUUCCU  
>random\_seq\_from\_cds\_\_NO\_1306 RANDOM\_LENGTH 86 SEQ\_LENGTH 66  
GC\_CONTENT 0.560606060606061 BASEPAIR 25 FREE\_ENERGY  
-27.30 LEN\_BP\_RATIO 2.64  
CAGUGGUAUCUCCUGGUUUCUCUACUGCAUGGCCUGUACCCUGAGCACCAGCAUCGUUGUAGAG  
AGGAGGUCCGCGAGAUCCUAG  
>random\_seq\_from\_cds\_\_NO\_1310 RANDOM\_LENGTH 83 SEQ\_LENGTH 72  
GC\_CONTENT 0.555555555555556 BASEPAIR 24 FREE\_ENERGY  
-24.40 LEN\_BP\_RATIO 3  
ACUGAGAAUGCAUCCAAACGCCAUCCCUUUGCCUUUAUGCCCUUCUCUGCUGGGCCAGGGAACU  
GCAUUGGGCAGCAGUUUG  
>random\_seq\_from\_cds\_\_NO\_1319 RANDOM\_LENGTH 82 SEQ\_LENGTH 49  
GC\_CONTENT 0.510204081632653 BASEPAIR 19 FREE\_ENERGY  
-20.90 LEN\_BP\_RATIO 2.57894736842105  
CACCUCAGCACGGAGGUCCUUGUCUGACAAGAUGCUCCCAUCUCCAUCUUUGGCCAAGAGGAGG  
AUAUCCAGAAAAUCCAA  
>random\_seq\_from\_cds\_\_NO\_1322 RANDOM\_LENGTH 68 SEQ\_LENGTH 59  
GC\_CONTENT 0.542372881355932 BASEPAIR 19 FREE\_ENERGY  
-17.20 LEN\_BP\_RATIO 3.10526315789474  
GGUCACUAAUGGCCUGUAUGUAGGACUGAGAAUCCCUGUCCACCUGGAUGCUGCCUGAUGGCU  
GAA  
>random\_seq\_from\_cds\_\_NO\_1324 RANDOM\_LENGTH 106 SEQ\_LENGTH 94  
GC\_CONTENT 0.574468085106383 BASEPAIR 32 FREE\_ENERGY  
-35.60 LEN\_BP\_RATIO 2.9375  
AGGAGCUCUCCCAUUUGUCCCAGCAUCACUCGUACAGAGUCUGCCAUGAGCCCCACAUAGGGCU  
UCAGGAUGUCAUAGUGGAAGGCUGGGGUCAGCAUCCGUCGA  
>random\_seq\_from\_cds\_\_NO\_1335 RANDOM\_LENGTH 96 SEQ\_LENGTH 69  
GC\_CONTENT 0.405797101449275 BASEPAIR 27 FREE\_ENERGY  
-19.40 LEN\_BP\_RATIO 2.555555555555556  
AUUCCAUUUUAACAUCUGAAAGCAUACAUAUGAGGUGAUGGCUCAUUCUGUGAAAUGAUGCUGG  
GAUAAGUGGGAGAAGAUUUGCAGCACUCAGG  
>random\_seq\_from\_cds\_\_NO\_1336 RANDOM\_LENGTH 67 SEQ\_LENGTH 57

---

```
GC_CONTENT    0.43859649122807 BASEPAIR   21 FREE_ENERGY
-18.20 LEN_BP_RATIO  2.71428571428571
ACACAAGCGUGGAGGUCUAUGAGCACAUCAACUCGAUGUCUCUGGAUUAUAUCAUGAAAUGCUCU
UU
>random_seq_from_cds__NO_1345 RANDOM_LENGTH 83 SEQ_LENGTH    73
GC_CONTENT    0.465753424657534  BASEPAIR   27 FREE_ENERGY
-15.70 LEN_BP_RATIO  2.7037037037037
UUGAGGUUCUCUCAGGAGAAUUCUGAUCAGAGACACCCCUAUGCCUACUUACCAUUCUCAGCUGG
AUCAAGGGAACUGCAUUG
>random_seq_from_cds__NO_1346 RANDOM_LENGTH 82 SEQ_LENGTH    70
GC_CONTENT    0.485714285714286  BASEPAIR   22 FREE_ENERGY
-21.10 LEN_BP_RATIO  3.18181818181818
GGCAGGAGUUUGCCAUGAUUGAGUUAAAGGUAACCAUUGCCUUGAUUCUGCUCCACUUCAGAGUG
ACUCCAGACCCCACCAG
>random_seq_from_cds__NO_1349 RANDOM_LENGTH 110 SEQ_LENGTH    99
GC_CONTENT    0.494949494949495  BASEPAIR   31 FREE_ENERGY
-23.70 LEN_BP_RATIO  3.19354838709677
CCUACCAGAUGUACCUUGGAAGCAGGAGCCAUGACUUUCAGCUACAUAUUGAGCAGGGGGUGU
GUGAUUUGGUUUUAUGUGAAGCUGCCUCCCCUAAGACGUUGGCUU
>random_seq_from_cds__NO_1352 RANDOM_LENGTH 82 SEQ_LENGTH    64
GC_CONTENT    0.46875  BASEPAIR   20 FREE_ENERGY  -15.50
LEN_BP_RATIO  3.2
AGAGGAUCAUGGUGCCAAUAUCGAAGAAGUGUUACAACGAGGAGAAGCACUCUCAGGCAUUGGA
UUCAAAGGCUAACAAUU
>random_seq_from_cds__NO_1354 RANDOM_LENGTH 88 SEQ_LENGTH    66
GC_CONTENT    0.772727272727273  BASEPAIR   24 FREE_ENERGY
-30.10 LEN_BP_RATIO  2.75
UGUUAAUAGUGUAUGUCCGAUUCUGGUGGCUGUGAGAUGGUGCCCCGCCUGCUGCUGCGCGCCUG
GCCCCGGGGCCCCGCGGUUGGUC
>random_seq_from_cds__NO_1372 RANDOM_LENGTH 68 SEQ_LENGTH    49
GC_CONTENT    0.591836734693878  BASEPAIR   19 FREE_ENERGY
-23.40 LEN_BP_RATIO  2.57894736842105
GCCCUC CAGGCACAGUGCUGGUGAGCUUCAGCAGAUGAUGGUUGAGUGCUC CAAGUACCAUGGCC
AGC
>random_seq_from_cds__NO_1373 RANDOM_LENGTH 99 SEQ_LENGTH    72
GC_CONTENT    0.5694444444444444  BASEPAIR   24 FREE_ENERGY
-27.90 LEN_BP_RATIO  3
UGACCAAAGAAGCAGCAAUGGGGCCAGGGCUUUGACCGACACUUGUUUGCUCUGCGGCAUCUGGC
AGCAGCCAAAGGGAUCAUCUUGCCUGAGCUCUAC
>random_seq_from_cds__NO_1378 RANDOM_LENGTH 110 SEQ_LENGTH    96
GC_CONTENT    0.3333333333333333  BASEPAIR   27 FREE_ENERGY
-20.81 LEN_BP_RATIO  3.55555555555556
CUGGACAAGAUAAUAAAUAUCUCGUAAGCCUUCUGGAUCCCUUGGAUUGAUUGACAUCAUAAGG
GAACCAAUUUUUGAUGUUGUAAAAGAAAUGUGUUAUCUCCAAUG
```

---

```
>random_seq_from_cds__NO_1406 RANDOM_LENGTH 75 SEQ_LENGTH 58
  GC_CONTENT 0.431034482758621 BASEPAIR 20 FREE_ENERGY
  -17.10 LEN_BP_RATIO 2.9
CAAGUUCAUCAUGACUAUGGCACCCAUUACAUCACAUCUGGAUCCAUGGGUGGCAUUUAUGAAU
AUAUCCUGGU

>random_seq_from_cds__NO_1417 RANDOM_LENGTH 75 SEQ_LENGTH 66
  GC_CONTENT 0.560606060606061 BASEPAIR 21 FREE_ENERGY
  -23.40 LEN_BP_RATIO 3.14285714285714
CAAUGGGGGUAUCUCUCCGAUAGGAGACCUCACAGGCUAGGCCUUGGGAUCCAACAGGACAGAU
GCAGUCACAG

>random_seq_from_cds__NO_1420 RANDOM_LENGTH 102 SEQ_LENGTH 88
  GC_CONTENT 0.636363636363636 BASEPAIR 30 FREE_ENERGY
  -35.60 LEN_BP_RATIO 2.93333333333333
GAUGAUGGCUGGGUUGUACUGCACAGCGUCUCCCCACUCCUGCAUCAGGUCCGCCGUCGGCAGCU
CCUGGUAUGCCAGGGUGGUGAUGUGCUCACUUGCCCC

>random_seq_from_cds__NO_1423 RANDOM_LENGTH 81 SEQ_LENGTH 64
  GC_CONTENT 0.484375 BASEPAIR 21 FREE_ENERGY -17.60
  LEN_BP_RATIO 3.04761904761905
CAUGGCCUCUUGUUAUAACGAGGGUGUAUUAUAAAUGCCCCAAGCACAGCCUCUGUGAUGU
AGUGGGUCCCAAAAU

>random_seq_from_cds__NO_1470 RANDOM_LENGTH 110 SEQ_LENGTH 105
  GC_CONTENT 0.419047619047619 BASEPAIR 33 FREE_ENERGY
  -31.40 LEN_BP_RATIO 3.18181818181818
GAGAUGUCAAUGCUGAAUGCAUAUAAACCCAAGGAGCAAGGCUAAAGAGCUACCUCUUCUGCUG
UACGCUUUAUGGAAGAAUUGGGUGAGUGGCCUUGGAAAAAUCU

>random_seq_from_cds__NO_1473 RANDOM_LENGTH 85 SEQ_LENGTH 74
  GC_CONTENT 0.445945945945946 BASEPAIR 26 FREE_ENERGY
  -29.82 LEN_BP_RATIO 2.84615384615385
GUGCAUGCUUUUUGAGUAUAUUAUCAGGGGGAUCUCCAUGAGUCCUCAUCAUGAGAUGCCAC
ACUCUGAUGUUGGCUGCAGC

>random_seq_from_cds__NO_1495 RANDOM_LENGTH 110 SEQ_LENGTH 96
  GC_CONTENT 0.572916666666667 BASEPAIR 28 FREE_ENERGY
  -27.79 LEN_BP_RATIO 3.42857142857143
ACUCUCAGGCUUCAGAGAUUUAACAGCCACCUGCUCUCCUUGUAUUGUCCCUUCGGGGUCAUACC
UGCAGAGCUCAACCUUCCCAAAGUGGCCUCCUCCCAAGUCACGG

>random_seq_from_cds__NO_1507 RANDOM_LENGTH 86 SEQ_LENGTH 71
  GC_CONTENT 0.577464788732394 BASEPAIR 27 FREE_ENERGY
  -25.30 LEN_BP_RATIO 2.62962962962963
GGUUGGAGAUUCCUCGGGGCUUGGGCUGGCAGCAGCGUUUJAGCAUGAAGCUGAUGUUAUCCGU
GCGCAGGAUCUGCUUCUUGAG

>random_seq_from_cds__NO_1522 RANDOM_LENGTH 86 SEQ_LENGTH 66
  GC_CONTENT 0.454545454545455 BASEPAIR 24 FREE_ENERGY
  -18.20 LEN_BP_RATIO 2.75
AUUUUUCUGCUUCUUGGAGAAUGACGCCACACUGACUGCUCAUUGUCGUUGGUCCAUGCCAAU
```

```
UGGUGAAAUAGAACCCUCAUC
>random_seq_from_cds__NO_1530 RANDOM_LENGTH 90 SEQ_LENGTH 73
  GC_CONTENT 0.397260273972603 BASEPAIR 25 FREE_ENERGY
  -15.90 LEN_BP_RATIO 2.92
UUCUGGAACCACAUGCUUCUAUGUACUGCACUGCUGAAUGUCCCAAACAUUUUAAGAGACACUG
AUAUGUGGAAAAGACAUUUCUUCUG
>random_seq_from_cds__NO_1558 RANDOM_LENGTH 89 SEQ_LENGTH 76
  GC_CONTENT 0.368421052631579 BASEPAIR 26 FREE_ENERGY
  -15.70 LEN_BP_RATIO 2.92307692307692
GGCCAAAGGAAGACAUGAUUUGCUGGAUCUGAAACCAUUUACAGAAUAUGAAUUUCAGAUUUCU
CUAAGCUACAUCUUUAUAAGGGAA
>random_seq_from_cds__NO_1563 RANDOM_LENGTH 74 SEQ_LENGTH 56
  GC_CONTENT 0.607142857142857 BASEPAIR 20 FREE_ENERGY
  -25.20 LEN_BP_RATIO 2.8
CGUAUUAACAUAUAUGAACCGUGUGAGGCAGGGUUGCUGGCUCCUCGCCAGGUCUCUGCAAACU
CAGAGGGCA
>random_seq_from_cds__NO_1571 RANDOM_LENGTH 100 SEQ_LENGTH 81
  GC_CONTENT 0.481481481481481 BASEPAIR 26 FREE_ENERGY
  -22.83 LEN_BP_RATIO 3.11538461538462
CAUGGUGGGCAUUUUCUCAACGCAUUACUCCAGCAAAAAGGUGUUUGUUCUCCUAGCAGCCCUC
AGACCUCAGUGGUGUAGCAGAGAAAUCCAGAUC
>random_seq_from_cds__NO_1579 RANDOM_LENGTH 82 SEQ_LENGTH 67
  GC_CONTENT 0.626865671641791 BASEPAIR 23 FREE_ENERGY
  -21.60 LEN_BP_RATIO 2.91304347826087
GAUAAGGUGGGGGAUGCCCUGGAGGAAGUGCUCAGCAAAGCCCUGAGUCAGCGCACGAUCACUGU
CGGGGUGUACGAAGCGG
>random_seq_from_cds__NO_1582 RANDOM_LENGTH 71 SEQ_LENGTH 63
  GC_CONTENT 0.80952380952381 BASEPAIR 23 FREE_ENERGY
  -34.90 LEN_BP_RATIO 2.73913043478261
UGCGCGUCAGCAACCCGGGCCGGCUGGCGGAGCUCCUGCUCUUGGAGACCGACGCUGGCCCCGCG
GCGAGC
>random_seq_from_cds__NO_1585 RANDOM_LENGTH 110 SEQ_LENGTH 100
  GC_CONTENT 0.76 BASEPAIR 37 FREE_ENERGY -57.80
  LEN_BP_RATIO 2.7027027027027
CCUGAACGGUGACAUGAGCAACACUACCGUCGUCCCCAGCACUGCAGGUCCGGGCCCCAGCGGCG
GGCCCCGUGGCGGAGGUGGUGGUGGCGGCGGAGGCGGCGGCACCG
>random_seq_from_cds__NO_1587 RANDOM_LENGTH 73 SEQ_LENGTH 62
  GC_CONTENT 0.516129032258065 BASEPAIR 21 FREE_ENERGY
  -19.60 LEN_BP_RATIO 2.95238095238095
UUCGCCUUUGCCAGUCUCAUCUCGUGUCUGCUUUGUUAAGUCCAUGAUCCAGACUCAGCAGUUG
UGGCACAG
>random_seq_from_cds__NO_1633 RANDOM_LENGTH 81 SEQ_LENGTH 68
  GC_CONTENT 0.426470588235294 BASEPAIR 24 FREE_ENERGY
  -16.90 LEN_BP_RATIO 2.83333333333333
```

---

UUUUCUACUAUAAGUACCAGAGCGAAUGUAUGUCUCCACGGGGUUGACACCACAUGCAUGGACCU  
UGAUUAGAACCCUGAU

>random\_seq\_from\_cds\_\_NO\_1636 RANDOM\_LENGTH 87 SEQ\_LENGTH 73  
GC\_CONTENT 0.506849315068493 BASEPAIR 25 FREE\_ENERGY  
-18.10 LEN\_BP\_RATIO 2.92

UGCCCAUAAUCCCAGAAUAAAGCCCCAGGAGGAUGCCAGUCUUUCAGCUUCGGUUUCCUGGUGU  
AUUAUCUGAGCUACAGGAAGUU

>random\_seq\_from\_cds\_\_NO\_1646 RANDOM\_LENGTH 110 SEQ\_LENGTH 90  
GC\_CONTENT 0.433333333333333 BASEPAIR 33 FREE\_ENERGY  
-26.30 LEN\_BP\_RATIO 2.72727272727273

AACACUGUAGCUGGUUUGGAUUUCUAGGAUUACAGGCCAUUAUCAUCUGCAAGCAUJAGGACAAU  
GUGACCUGUCAGGAAUACCUAGCCUCUUGACACUUCUAUAAACAG

>random\_seq\_from\_cds\_\_NO\_1655 RANDOM\_LENGTH 87 SEQ\_LENGTH 77  
GC\_CONTENT 0.649350649350649 BASEPAIR 32 FREE\_ENERGY  
-45.80 LEN\_BP\_RATIO 2.40625

GAGGCCAGGAGGUCCAUGGGGGCCUGGGACACCAUGGGGCCAUGGGGUACAGGUGGCCCUAAA  
GGAUUUACUGGGCCACCAAUC

>random\_seq\_from\_cds\_\_NO\_1675 RANDOM\_LENGTH 89 SEQ\_LENGTH 82  
GC\_CONTENT 0.609756097560976 BASEPAIR 28 FREE\_ENERGY  
-25.00 LEN\_BP\_RATIO 2.92857142857143

CACCAGGCCCGGGUCCAGCAUACCACAAACGCCCCUAAGACAGUCAUCACCGUCUUAUJAGC  
UUAUGGGUGUCCUCCGGCGGCUG

>random\_seq\_from\_cds\_\_NO\_1680 RANDOM\_LENGTH 68 SEQ\_LENGTH 53  
GC\_CONTENT 0.415094339622642 BASEPAIR 19 FREE\_ENERGY  
-16.70 LEN\_BP\_RATIO 2.78947368421053

UUUUUGAAACUGGGCCUGUGUUAAACAUCAGGAAUACAUAGGCAAUCCAGCGAAGAAAUCGGCA  
GCA

>random\_seq\_from\_cds\_\_NO\_1683 RANDOM\_LENGTH 109 SEQ\_LENGTH 91  
GC\_CONTENT 0.373626373626374 BASEPAIR 31 FREE\_ENERGY  
-24.50 LEN\_BP\_RATIO 2.93548387096774

CAGUGUUGCUCCAUUAUAAAAAAGUCCAUGUGCUUGUCAUAGUGACACUCAUUAUGUCAUUG  
UCGUGAAACAGUACGUGAUCUUAAGGGAAGAAACAUCUCACUAG

>random\_seq\_from\_cds\_\_NO\_1709 RANDOM\_LENGTH 70 SEQ\_LENGTH 50  
GC\_CONTENT 0.44 BASEPAIR 20 FREE\_ENERGY -19.00  
LEN\_BP\_RATIO 2.5

CAUCAAUUGAAAAACACAGUGACUGUGGAUAAUACUGUGGGCAACGACACUAUGUUUCUAGUUAC  
GUGGC

>random\_seq\_from\_cds\_\_NO\_1727 RANDOM\_LENGTH 82 SEQ\_LENGTH 63  
GC\_CONTENT 0.492063492063492 BASEPAIR 20 FREE\_ENERGY  
-17.20 LEN\_BP\_RATIO 3.15

GAAGACAAAGGCUGACUAUGUGAGACCAAACUUGAGACCUACAAAAAUGGCUGAUGUUCUGGUU  
GCUGAGUCUACUCCUCC

>random\_seq\_from\_cds\_\_NO\_1738 RANDOM\_LENGTH 82 SEQ\_LENGTH 62  
GC\_CONTENT 0.483870967741936 BASEPAIR 22 FREE\_ENERGY

---

-18.31 LEN\_BP\_RATIO 2.81818181818182  
CGGAUGGGGAAGACAACACUAUAAGUGGGUGCUUUAACGAGGUCAAACAAAGUGGUGCCAUCAUC  
CACACAGUCGCUUUGG  
>random\_seq\_from\_cds\_\_NO\_1774 RANDOM\_LENGTH 94 SEQ\_LENGTH 73  
GC\_CONTENT 0.465753424657534 BASEPAIR 24 FREE\_ENERGY  
-20.20 LEN\_BP\_RATIO 3.04166666666667  
GGAAAAUUUCACAGUGGAUGCAACUCCAAAUGGCCUAUCUCAGUAUUCAGGAACUGCAAAGG  
GUGGGCACUUGGGCAUACAAUCUUAAGC  
>random\_seq\_from\_cds\_\_NO\_1787 RANDOM\_LENGTH 87 SEQ\_LENGTH 57  
GC\_CONTENT 0.385964912280702 BASEPAIR 20 FREE\_ENERGY  
-15.50 LEN\_BP\_RATIO 2.85  
AUUGAAAAGCUCACUGGUAACUUUGAAUAACAAUGGAUAUGAUGGCAUUGUCAUUGCAAUUAUC  
CCAGUGUACCAGAAGAUGAAAA  
>random\_seq\_from\_cds\_\_NO\_1833 RANDOM\_LENGTH 71 SEQ\_LENGTH 62  
GC\_CONTENT 0.564516129032258 BASEPAIR 23 FREE\_ENERGY  
-22.40 LEN\_BP\_RATIO 2.69565217391304  
UCCUGGAGGUUUCUGUGGGCAGCUGCACCUUCUGGCCCAUCUGCUGUUCAUAGUGGGCAAUAGC  
CUUUUG  
>random\_seq\_from\_cds\_\_NO\_1844 RANDOM\_LENGTH 79 SEQ\_LENGTH 68  
GC\_CONTENT 0.529411764705882 BASEPAIR 25 FREE\_ENERGY  
-25.20 LEN\_BP\_RATIO 2.72  
UCUGGAUUCGCCAUCAGUCGCCCAUAGUGUUCUCAAUGAGGCACAUUGGGCCUGUCAUGUGGAU  
CUCUGAUGCCAUGA  
>random\_seq\_from\_cds\_\_NO\_1846 RANDOM\_LENGTH 102 SEQ\_LENGTH 60  
GC\_CONTENT 0.4 BASEPAIR 25 FREE\_ENERGY -15.30 LEN\_BP\_RATIO  
2.4  
UGAUACAAGAUAAAAUAAAUACAACACACCCAAAUACAGGAUGAUAGUUCGUGUGACAAACAGA  
GAUAUCAUUUGUCAGGAUUGCUUAUGCCCGUAUAGAG  
>random\_seq\_from\_cds\_\_NO\_1849 RANDOM\_LENGTH 62 SEQ\_LENGTH 51  
GC\_CONTENT 0.490196078431373 BASEPAIR 21 FREE\_ENERGY  
-21.80 LEN\_BP\_RATIO 2.42857142857143  
CAAGUGGAGGUGACUGGUGAUGAAUACA AUGUGGAAAGCAUUGAUGGUCAGCCAGGUGCCUU  
>random\_seq\_from\_cds\_\_NO\_1855 RANDOM\_LENGTH 98 SEQ\_LENGTH 76  
GC\_CONTENT 0.5 BASEPAIR 26 FREE\_ENERGY -29.50 LEN\_BP\_RATIO  
2.92307692307692  
GAAGAAGGAUCGGGUAGCUCAAAAGAAGGCAAGCUUCCUCAGAGCUCAGGAGCGGGCUGCUGAGA  
GCUAAAUCAAAGCUCUGCCUGCUUUACAGGAG  
>random\_seq\_from\_cds\_\_NO\_1864 RANDOM\_LENGTH 68 SEQ\_LENGTH 52  
GC\_CONTENT 0.557692307692308 BASEPAIR 20 FREE\_ENERGY  
-18.00 LEN\_BP\_RATIO 2.6  
CCACUGCAAUGCCGAUGGCCAUUGUGUUGUGUCCUUUCAAUUAUGUCCAGGCGCAGCUGGUGUCC  
GUG  
>random\_seq\_from\_cds\_\_NO\_1869 RANDOM\_LENGTH 81 SEQ\_LENGTH 59  
GC\_CONTENT 0.627118644067797 BASEPAIR 22 FREE\_ENERGY



---

-27.70 LEN\_BP\_RATIO 2.6818181818181818  
GUAGUUGACGCCAGAGUUCGGGGACCUGGCGCCUCAUUCUGCUUGGCUGUGAGCAGUUCUGUGU  
GGCUUCCUGGGCACA  
>random\_seq\_from\_cds\_\_NO\_1877 RANDOM\_LENGTH 92 SEQ\_LENGTH 75  
GC\_CONTENT 0.6666666666666667 BASEPAIR 30 FREE\_ENERGY  
-37.30 LEN\_BP\_RATIO 2.5  
GGUUGCCCACGUAGCAGCGCACCAGGCCGGGAUGGAGUCGAAGCUCUCCAUCUCGAACUGGUAC  
UGCACGCGGCUGUAGGCCUCGCUGAGU  
>random\_seq\_from\_cds\_\_NO\_1887 RANDOM\_LENGTH 110 SEQ\_LENGTH 97  
GC\_CONTENT 0.463917525773196 BASEPAIR 33 FREE\_ENERGY  
-27.00 LEN\_BP\_RATIO 2.93939393939394  
AGUCAAAUCUGGUGGCAUCACACAGCAGGAGGCAAGAUUAACUUGGUUACUAUUUGGUUUUACCC  
UGUGCCCACUGAUACAGCUGUCCAACUGUGUUUUGUCUAGAUA  
>random\_seq\_from\_cds\_\_NO\_1897 RANDOM\_LENGTH 89 SEQ\_LENGTH 78  
GC\_CONTENT 0.487179487179487 BASEPAIR 27 FREE\_ENERGY  
-24.50 LEN\_BP\_RATIO 2.88888888888889  
ACAGGGUUCAGGUCAGGAAGCAGGUCGUCCUUCGGGAUUUGAUCUUCAUUGUGACGAUAUAGCC  
AUCUCCAAAUCUUGGACUUGAGAU  
>random\_seq\_from\_cds\_\_NO\_1911 RANDOM\_LENGTH 72 SEQ\_LENGTH 52  
GC\_CONTENT 0.538461538461538 BASEPAIR 19 FREE\_ENERGY  
-16.40 LEN\_BP\_RATIO 2.73684210526316  
AUCCCAUACAGCAGGAGCAGUGCCACAAGGGCAGGAAGGUUUUCUGGAGAAGUGUAGGCUUUCU  
CUGAAAC  
>random\_seq\_from\_cds\_\_NO\_1914 RANDOM\_LENGTH 80 SEQ\_LENGTH 57  
GC\_CONTENT 0.491228070175439 BASEPAIR 20 FREE\_ENERGY  
-20.30 LEN\_BP\_RATIO 2.85  
GAAGGACAUGGAGAAAUCACGCAGAUGGCAACCACAGCAUCCACUGAAGUGGUCAGCCACUGUA  
AUCUCUGAGAGCUGC  
>random\_seq\_from\_cds\_\_NO\_1930 RANDOM\_LENGTH 110 SEQ\_LENGTH 101  
GC\_CONTENT 0.475247524752475 BASEPAIR 29 FREE\_ENERGY  
-25.17 LEN\_BP\_RATIO 3.48275862068966  
CUUAUUUGGAAGAAGGAAGAUAAAGUUCUUGACCAAUGCACUCCACCAGCUUUGCCUCUGGAACAU  
GGUGGAGAACUACAUCAUCAGCUCAUUUACAUCSCCAUCCAGG  
>random\_seq\_from\_cds\_\_NO\_1940 RANDOM\_LENGTH 98 SEQ\_LENGTH 83  
GC\_CONTENT 0.542168674698795 BASEPAIR 24 FREE\_ENERGY  
-28.90 LEN\_BP\_RATIO 3.458333333333333  
AGUCCGUGUAUUCUUCUGGGUGCUCUGGAUCCUGGUUUCUUGUAGGGGCUCGGUCUUUUC  
CAGGGCUCUUUCUUCUGGUUGAACACCCUU  
>random\_seq\_from\_cds\_\_NO\_1946 RANDOM\_LENGTH 92 SEQ\_LENGTH 65  
GC\_CONTENT 0.476923076923077 BASEPAIR 26 FREE\_ENERGY  
-21.70 LEN\_BP\_RATIO 2.5  
ACAGGAAGAGGAUGAAUGGGUCGCUGUAAUGUAGGAUUCUCCAUGCCAUGAUGAAUAUCGUCAG  
GAGGAAGAUGCUCUACGACAUGAUGGA  
>random\_seq\_from\_cds\_\_NO\_1953 RANDOM\_LENGTH 84 SEQ\_LENGTH 77

---

```
GC_CONTENT    0.519480519480519    BASEPAIR    28    FREE_ENERGY
-22.40    LEN_BP_RATIO    2.75
CAUGUCAGGGAUACCACUCCGGCCCGAACAUGUUUCCUCCAGUAGAGAGAGGGCACGUUGG
UGAGCUGAGUUUCAUCAU
>random_seq_from_cds__NO_1959    RANDOM_LENGTH    81    SEQ_LENGTH    70
GC_CONTENT    0.4    BASEPAIR    28    FREE_ENERGY    -19.70    LEN_BP_RATIO
2.5
CUGGAUCAUUGCAUUACAAAAGGAUGCUUGUUCUUCUGUCAUAAGAAUAGAUAGGAUCCUCCU
GUGGAGUCAAUCCCCA
>random_seq_from_cds__NO_1970    RANDOM_LENGTH    72    SEQ_LENGTH    49
GC_CONTENT    0.469387755102041    BASEPAIR    20    FREE_ENERGY
-18.90    LEN_BP_RATIO    2.45
UGUUGGGGAAAUGGCCAUUCAUGAUGGCUGUAGAGUGGGUUGGCAUCCUUAACCAGAUCAAGAC
CAGAAAU
>random_seq_from_cds__NO_1998    RANDOM_LENGTH    70    SEQ_LENGTH    58
GC_CONTENT    0.431034482758621    BASEPAIR    20    FREE_ENERGY
-16.60    LEN_BP_RATIO    2.9
UCUUCGGUUAACUGUUCGGGAGGGAAUCACUGCUUGAACACUGAAACAGUAGUUUUCUCCUUUA
UCCAC
>random_seq_from_cds__NO_2005    RANDOM_LENGTH    63    SEQ_LENGTH    54
GC_CONTENT    0.796296296296296    BASEPAIR    19    FREE_ENERGY
-27.10    LEN_BP_RATIO    2.84210526315789
ACCUGGGCGAAGACCCAGCCGAGCAGGAGCGUCCGAGCGACGGCGGUCUCGGGGCGCGGGACC
>random_seq_from_cds__NO_2007    RANDOM_LENGTH    84    SEQ_LENGTH    61
GC_CONTENT    0.459016393442623    BASEPAIR    22    FREE_ENERGY
-17.50    LEN_BP_RATIO    2.77272727272727
CUGACGAACUACUCUCAGGCAGUGUUCUCAGUAGUCCGAACUCUAAUAUGAGCAGCAUGGUAGUU
ACAGGCCAAUGGUAUGAU
>random_seq_from_cds__NO_2020    RANDOM_LENGTH    90    SEQ_LENGTH    69
GC_CONTENT    0.405797101449275    BASEPAIR    24    FREE_ENERGY
-16.50    LEN_BP_RATIO    2.875
AGACAGCGCUCUAAUACAGAUGGCUGAUGGAAACCAAUCACAACUUGGCCAUGAAUCAUCUAAU
GGACAGAAAAUGUAUGGAAAAAUUA
>random_seq_from_cds__NO_2031    RANDOM_LENGTH    75    SEQ_LENGTH    54
GC_CONTENT    0.518518518518518    BASEPAIR    21    FREE_ENERGY
-24.50    LEN_BP_RATIO    2.57142857142857
UCCAUGAGUUCAGCUAUACGUGGAACUGGUUCCCUUUCUGGUGACUCACAGUAGCUGGACUCUG
UCCAUCCAG
>random_seq_from_cds__NO_2038    RANDOM_LENGTH    81    SEQ_LENGTH    75
GC_CONTENT    0.546666666666667    BASEPAIR    27    FREE_ENERGY
-27.30    LEN_BP_RATIO    2.77777777777778
UUGUCCAGGGCAUACAUGGGGCCAGAGGUUGUCCCGGAUGAUUCUGGGGGAAACAUUUGUCA
CAAUGUCCCUUAUCA
>random_seq_from_cds__NO_2053    RANDOM_LENGTH    88    SEQ_LENGTH    77
```

---

```
GC_CONTENT    0.493506493506494    BASEPAIR    30    FREE_ENERGY
-27.80    LEN_BP_RATIO    2.566666666666667
UGGGGGAGGCAGCGAAGGAUUUCUGAUCUGUGGGGAUACUCAUUGCUUUGAAUACCCUCAGUAGCA
AAUUGCUGCAAUCCACCAAUAU
>random_seq_from_cds__NO_2061    RANDOM_LENGTH    85    SEQ_LENGTH    62
GC_CONTENT    0.483870967741936    BASEPAIR    22    FREE_ENERGY
-15.40    LEN_BP_RATIO    2.81818181818182
AUGAGUCUGUCCAGAGAAUGUGCUGAGUUUCGAUGACCUUACUGCAGACGCUUUAGCUGAACCU
GAAAGUCUCACAAAUCAAAA
>random_seq_from_cds__NO_2065    RANDOM_LENGTH    80    SEQ_LENGTH    71
GC_CONTENT    0.535211267605634    BASEPAIR    23    FREE_ENERGY
-20.90    LEN_BP_RATIO    3.08695652173913
UGGUGUUCUGGAACAGGCUCUCAUCCAGUAUGCCCUUCGCACCUUGGGAAGUCGGGGCUACAUU
CCCAUUUAUACCCCC
>random_seq_from_cds__NO_2071    RANDOM_LENGTH    73    SEQ_LENGTH    57
GC_CONTENT    0.56140350877193    BASEPAIR    23    FREE_ENERGY
-20.00    LEN_BP_RATIO    2.47826086956522
AAUAUUGUCUCAGGGUUCUUUGAAUCAUGCUGCCAGUAAGAAGCUUGACCUGGAGGCCUGGUUUC
CGGGCUCA
>random_seq_from_cds__NO_2072    RANDOM_LENGTH    63    SEQ_LENGTH    54
GC_CONTENT    0.62962962962963    BASEPAIR    22    FREE_ENERGY
-25.10    LEN_BP_RATIO    2.45454545454545
GGAGCCUUCGUGAGUUGGUCUCCUGUUCUAAUUGCACGGAUUACCAGGCUCGCCGGCUUCGA
>random_seq_from_cds__NO_2082    RANDOM_LENGTH    85    SEQ_LENGTH    76
GC_CONTENT    0.684210526315789    BASEPAIR    24    FREE_ENERGY
-28.60    LEN_BP_RATIO    3.166666666666667
CCUGCAAGCUGGCACAGGCCCCCGGGCUCAGGGCAGGGGAAAGGUCACCAGAAGAGUCCUGGGU
GGGCGUCGAAAAGGAAUGU
>random_seq_from_cds__NO_2096    RANDOM_LENGTH    94    SEQ_LENGTH    81
GC_CONTENT    0.592592592592593    BASEPAIR    29    FREE_ENERGY
-29.30    LEN_BP_RATIO    2.79310344827586
CAGGCUGGAUCUCUGUGGCUGCUGAACUGGACCGGGAGGAAGUUGAUUUCUACAGCUUUGGGGUA
GAAGCUCGAGACCAUGGCACUCCAGCACU
>random_seq_from_cds__NO_2098    RANDOM_LENGTH    88    SEQ_LENGTH    80
GC_CONTENT    0.5875    BASEPAIR    27    FREE_ENERGY    -29.10
LEN_BP_RATIO    2.96296296296296
GCGGCUCAAUGAGGAUGCAGCUGUGGGCACCAGCGUGGUGACGGUGUCAGCUGUGGACCGUGAUG
CUCAUAGUGUCAUACCUACCAG
>random_seq_from_cds__NO_2103    RANDOM_LENGTH    110    SEQ_LENGTH    84
GC_CONTENT    0.595238095238095    BASEPAIR    27    FREE_ENERGY
-32.60    LEN_BP_RATIO    3.11111111111111
AUCGAUGCAGACACGGGGCUGUCACCACCCAGGCUGAGCUGGACUAUGAAGACCAAGUGUCUUA
CACCCUGGCCAUUACUGCUCGGGACAAUGGCAUUCCCCAGAAGUC
>random_seq_from_cds__NO_2110    RANDOM_LENGTH    64    SEQ_LENGTH    47
```

---

```
GC_CONTENT    0.531914893617021    BASEPAIR    19    FREE_ENERGY
-17.30    LEN_BP_RATIO    2.47368421052632
AACAUCCUGAGGUCUUUCAGCUGGACAUCUUCUCCGGGGAGCUGACAGCCCUGGUAGACUUAG
>random_seq_from_cds__NO_2119    RANDOM_LENGTH    86    SEQ_LENGTH    75
GC_CONTENT    0.6666666666666667    BASEPAIR    25    FREE_ENERGY
-24.00    LEN_BP_RATIO    3
CUGCCUGCGGGAGCCCUGCGAGAACUACAUGCUGCGUGUCGGUGCUGCGCUUCGACUCCUCCG
CGCCCUUCAUCGCCUCCUCCU
>random_seq_from_cds__NO_2120    RANDOM_LENGTH    87    SEQ_LENGTH    83
GC_CONTENT    0.734939759036145    BASEPAIR    28    FREE_ENERGY
-33.70    LEN_BP_RATIO    2.96428571428571
CCGUGCUCUUCGGCCCAUCCACCCCGUCGGAGGGCUGCGCUGCCGCUGCCCGCCCGGCUUCACG
GGUGACUACUGCGAGACCGAGG
>random_seq_from_cds__NO_2127    RANDOM_LENGTH    85    SEQ_LENGTH    70
GC_CONTENT    0.642857142857143    BASEPAIR    26    FREE_ENERGY
-31.10    LEN_BP_RATIO    2.69230769230769
ACUGUUGGGUCAGACAGGGCUCCACAGGGCCAUCAGAGCAGAAGGUGGCUGUGGUGACCGUGG
AUGGCUGUGACACAGGAGUG
>random_seq_from_cds__NO_2128    RANDOM_LENGTH    71    SEQ_LENGTH    63
GC_CONTENT    0.650793650793651    BASEPAIR    24    FREE_ENERGY
-32.30    LEN_BP_RATIO    2.625
GCCUUGCGCUUCGGAUCUGUCCUGGGCAACUACUCCUGUGCUGCCCAGGGCACCCAGGGUGGCAG
CAAGAA
>random_seq_from_cds__NO_2160    RANDOM_LENGTH    90    SEQ_LENGTH    61
GC_CONTENT    0.655737704918033    BASEPAIR    20    FREE_ENERGY
-27.00    LEN_BP_RATIO    3.05
UGCCCUGGGCCUGGCUCAGCUGGUCUUCUCCUGGGAAUCAACCAGGCUGACCUCCUGUUUGCC
UGCACAGUCAUUGCCAUCCUGCUGC
>random_seq_from_cds__NO_2166    RANDOM_LENGTH    73    SEQ_LENGTH    51
GC_CONTENT    0.627450980392157    BASEPAIR    19    FREE_ENERGY
-18.90    LEN_BP_RATIO    2.68421052631579
UCCUAUGUGGUGCUUAGCAAGGAGGUCCGAAAGCACUCAAGCUUGCCUGCAGCCGCAAGCCCAG
CCCUGACC
>random_seq_from_cds__NO_2173    RANDOM_LENGTH    73    SEQ_LENGTH    63
GC_CONTENT    0.6666666666666667    BASEPAIR    22    FREE_ENERGY
-26.10    LEN_BP_RATIO    2.86363636363636
CCCCUGAGGAGCGGCUGCGGGAGAAUGGAGAUGCCUGUCUCGAGAGGGGUCCCUAGGCCCCCU
CCAGGCUC
>random_seq_from_cds__NO_2186    RANDOM_LENGTH    68    SEQ_LENGTH    48
GC_CONTENT    0.5208333333333333    BASEPAIR    19    FREE_ENERGY
-24.60    LEN_BP_RATIO    2.52631578947368
GCUAGGCCAGUGAAUAGAUGGGGUCCUGGUGAACGUGUAGGUUUGCCAGCAUUGACCUUCGUC
UGU
>random_seq_from_cds__NO_2198    RANDOM_LENGTH    77    SEQ_LENGTH    62
```

---

```
GC_CONTENT    0.387096774193548    BASEPAIR    22    FREE_ENERGY
-15.10    LEN_BP_RATIO    2.81818181818182
GAGGGCUAUACAUCAUCUGAGUGAGAGGAUGAAAAGGGAGAUCUGUUUGCACAAAAUUCUUCGCA
AAAUCUGAUGAU
>random_seq_from_cds__NO_2200    RANDOM_LENGTH    102    SEQ_LENGTH    81
GC_CONTENT    0.382716049382716    BASEPAIR    27    FREE_ENERGY
-19.60    LEN_BP_RATIO    3
GCCAAAUUCAGUCCGAAUAAAAGGUGUUUAUGAUGAGAUCUGUAAUAUCCUUAAGUUCUCCCAU
AAUCCUCACCUUCGAUAUAGCUUGGACUGUCCAAAAG
>random_seq_from_cds__NO_2211    RANDOM_LENGTH    79    SEQ_LENGTH    52
GC_CONTENT    0.557692307692308    BASEPAIR    19    FREE_ENERGY
-17.75    LEN_BP_RATIO    2.73684210526316
AAUUAGCCCACUCAUGGCACAACCCUAUGUGAGCAUCAAUUCUCUACAAUUUUCUCAAUGCUGCUG
GGCUCCAUCAGUGG
>random_seq_from_cds__NO_2218    RANDOM_LENGTH    97    SEQ_LENGTH    75
GC_CONTENT    0.52    BASEPAIR    26    FREE_ENERGY    -20.30
LEN_BP_RATIO    2.88461538461538
GACUCAUGCAUACGAUUCACUUCGUAUCUUCACCAGCACCAUAUCAUAGGCACUGAGGGCUG
CACAGAAAUGAUGCAGGUGACUCCUCGAAG
>random_seq_from_cds__NO_2221    RANDOM_LENGTH    102    SEQ_LENGTH    68
GC_CONTENT    0.544117647058823    BASEPAIR    23    FREE_ENERGY
-21.80    LEN_BP_RATIO    2.95652173913043
UAAUUCGUUCUAAUUGGUUCAGGUAGCUAAGAUGCGGAGUCAUUAAGCUGGUAAUUCUGCAGCUCU
CUCGAAGCAGGCUUGCACCCACCAUCCUCCACAAC
>random_seq_from_cds__NO_2234    RANDOM_LENGTH    85    SEQ_LENGTH    74
GC_CONTENT    0.621621621621622    BASEPAIR    26    FREE_ENERGY
-29.30    LEN_BP_RATIO    2.84615384615385
UCACAAAGAUGGCUGUCUGGGGCAACAAGUAGCAUGCCCAUGACUCUGGGGUACUGGGACAUCGG
UGGGGCUGGCCCACGCCAUC
>random_seq_from_cds__NO_2239    RANDOM_LENGTH    68    SEQ_LENGTH    53
GC_CONTENT    0.509433962264151    BASEPAIR    20    FREE_ENERGY
-17.50    LEN_BP_RATIO    2.65
UGGGGAAGCGGCCAUGGUUUGCAGGAGACAAGGAUCACCUUUGUGGAUUUCCUUGCCUAUGAUGU
CCU
>random_seq_from_cds__NO_2247    RANDOM_LENGTH    88    SEQ_LENGTH    75
GC_CONTENT    0.52    BASEPAIR    25    FREE_ENERGY    -20.50
LEN_BP_RATIO    3
UCAUUUGCUGCAGUGUUGUGGUAUAAAUGGCACGAGUGAUUGGACCAGUGGCCACCAGCAUCU
GCCCCUCAGAUCGAAAAGUGGAG
>random_seq_from_cds__NO_2263    RANDOM_LENGTH    110    SEQ_LENGTH    84
GC_CONTENT    0.476190476190476    BASEPAIR    28    FREE_ENERGY
-19.53    LEN_BP_RATIO    3
UGAAGAACGGCCAAGGUUUUGCACUAGUAUAUUCUAUUACAGCUCAGUCCACGUUUAACGACUUA
CAGGACCUGAGGGAACAGAUUUUACGGGUUAAGGACACGGAAGAU
```

---

```
>random_seq_from_cds__NO_2276 RANDOM_LENGTH 110 SEQ_LENGTH 87
  GC_CONTENT 0.540229885057471 BASEPAIR 28 FREE_ENERGY
-29.80 LEN_BP_RATIO 3.10714285714286
UGGAACGGAACACAUCACUAGAUCUGGGAACUGGAUCAUCAUGUCAUGUUGGGCAGUGGAU
GCGAUUGCAGACGAACCAGGAGGAGUUUGCUCCACUCAUCAGG
>random_seq_from_cds__NO_2277 RANDOM_LENGTH 90 SEQ_LENGTH 76
  GC_CONTENT 0.605263157894737 BASEPAIR 29 FREE_ENERGY
-28.50 LEN_BP_RATIO 2.62068965517241
ACUGCGGCCAUAGAUGGACAGGCGGGGCUCAGCAUGCUGGUACUUGGCCUCCACCAGGUCCGCAC
CUACCUCUUUGAUGAUAGUGGCAA
>random_seq_from_cds__NO_2285 RANDOM_LENGTH 77 SEQ_LENGTH 67
  GC_CONTENT 0.522388059701492 BASEPAIR 25 FREE_ENERGY
-23.50 LEN_BP_RATIO 2.68
AGGAAGGUUGUCUGUUCGGAAGGGGUCCUCUCCUUCUUCACAGGAGGAGUAAAGACCUGGAUAG
AAGCUCUCAUUU
>random_seq_from_cds__NO_2288 RANDOM_LENGTH 85 SEQ_LENGTH 78
  GC_CONTENT 0.371794871794872 BASEPAIR 27 FREE_ENERGY
-17.10 LEN_BP_RATIO 2.88888888888889
UGGAGAUGAGGAAAUGUAUUCAUCAUUGUGGGACAGUUUGGUGGAAGAUGUUUCACUAGUGGAA
UGGACAAAUUAACAGUCUUC
>random_seq_from_cds__NO_2294 RANDOM_LENGTH 95 SEQ_LENGTH 75
  GC_CONTENT 0.466666666666667 BASEPAIR 26 FREE_ENERGY
-18.50 LEN_BP_RATIO 2.88461538461538
UAACUCUUGGCCAGUUCGUGGGCUUGUUUUGUAUCAACUGUCCUUGUUGGCAAUACACUUGUU
UCCACUAGCACCAUAGGUACAUCAUCCGA
>random_seq_from_cds__NO_2334 RANDOM_LENGTH 75 SEQ_LENGTH 58
  GC_CONTENT 0.5 BASEPAIR 19 FREE_ENERGY -15.40 LEN_BP_RATIO
3.05263157894737
UUGCACAUGAUGACAGGUGUGAUGUACCUACAGUUUGUACCCAAGUCUCACCUCUUCUUCACUGC
CGGAAAAGAU
>random_seq_from_cds__NO_2339 RANDOM_LENGTH 85 SEQ_LENGTH 66
  GC_CONTENT 0.5 BASEPAIR 21 FREE_ENERGY -19.77 LEN_BP_RATIO
3.14285714285714
AAAAUGAAGGAACACAAAGCCAUUUGUAAAGCUGCAGGGAAAGAGGGUCCACUUCCAGCAACC
CCAUCCUAAUGGCUUAUGGC
>random_seq_from_cds__NO_2360 RANDOM_LENGTH 87 SEQ_LENGTH 66
  GC_CONTENT 0.621212121212121 BASEPAIR 25 FREE_ENERGY
-31.80 LEN_BP_RATIO 2.64
ACUUGCCCACAGAGGCUGGGAAAGGAUGAUAGGCUGGGAGAAUGGUCUGAGCUACCUGCCCGUCC
UGCUGGGGCAUCAUGGCAGUGG
>random_seq_from_cds__NO_2366 RANDOM_LENGTH 87 SEQ_LENGTH 75
  GC_CONTENT 0.52 BASEPAIR 23 FREE_ENERGY -18.40
  LEN_BP_RATIO 3.26086956521739
ACAUAGGGUUGGGUGAGGCCUGUAAGAUCACAGGGGAUGUAAUCAUUGGAGAGGAUGUGGUGUCG
```

```
GAAACAUACGUGUGAGGAGAUU
>random_seq_from_cds__NO_2385 RANDOM_LENGTH 110 SEQ_LENGTH 90
  GC_CONTENT 0.5111111111111111 BASEPAIR 30 FREE_ENERGY
  -29.12 LEN_BP_RATIO 3
UGUUCUUGUUCACCAGGAAGGGAUCGCGUGUCAUCCUCUGUUUCUUAUAGCAGCUGACUUCUC
ACCAUAAUAGGGGUACACCAUGAGUUCUCCUUGGGAGUCCCGCUU
>random_seq_from_cds__NO_2392 RANDOM_LENGTH 81 SEQ_LENGTH 72
  GC_CONTENT 0.7083333333333333 BASEPAIR 27 FREE_ENERGY
  -30.40 LEN_BP_RATIO 2.666666666666667
CUGGCAGGGGCUACUGGCACAGCCUGACUCGCAGUCCCGGGACUGGGGCAGAAGCAGCGGGGUC
CAGAGGCGGUGGCAC
>random_seq_from_cds__NO_2396 RANDOM_LENGTH 98 SEQ_LENGTH 83
  GC_CONTENT 0.566265060240964 BASEPAIR 29 FREE_ENERGY
  -28.60 LEN_BP_RATIO 2.86206896551724
AGGGGUUGGAGAGGCACUCGUUGAUGUCUCCUCACAACGCUCCCAAGCCAGGCAAGCAG
CGACAACUGUAGCCUCCAAUCCUAUCCAUGCAC
>random_seq_from_cds__NO_2403 RANDOM_LENGTH 84 SEQ_LENGTH 60
  GC_CONTENT 0.6333333333333333 BASEPAIR 21 FREE_ENERGY
  -23.20 LEN_BP_RATIO 2.85714285714286
UUCACCAGGUCCUGACAGUUUUUCCAGUGUAGCCCAGGGGGCAGCUGCAGCGGUAGGUACCCA
GGCCAUAACACACGUUCC
>random_seq_from_cds__NO_2422 RANDOM_LENGTH 94 SEQ_LENGTH 80
  GC_CONTENT 0.5125 BASEPAIR 28 FREE_ENERGY -25.30
  LEN_BP_RATIO 2.85714285714286
AUGCACACCUUUGAAACCCUGGCAUGCACAGACAUGUGAAGCCUCCAAUCUUAUCCAGACAGGUA
GCAUCAUUCUGGCAGGGGUCUGAAUGGCA
>random_seq_from_cds__NO_2423 RANDOM_LENGTH 81 SEQ_LENGTH 61
  GC_CONTENT 0.557377049180328 BASEPAIR 22 FREE_ENERGY
  -15.40 LEN_BP_RATIO 2.77272727272727
CUCAUUGAUGUCCAUCUCACAACGAGGUCCUGCAUAACCCUUCAGACACUCACAGUGGAAGGCGC
CAUCCGUGUUCACACA
>random_seq_from_cds__NO_2424 RANDOM_LENGTH 97 SEQ_LENGTH 74
  GC_CONTENT 0.567567567567568 BASEPAIR 26 FREE_ENERGY
  -34.26 LEN_BP_RATIO 2.84615384615385
UUUUCUGCAUGCUCACAAGGAUUGCUAUUGGCCCAUGGCACAUUCAUCCACAUCUUCUGUGCAG
UCAGCCCCUUGUAGCCUUGUGGGCAGGUGCA
>random_seq_from_cds__NO_2443 RANDOM_LENGTH 101 SEQ_LENGTH 83
  GC_CONTENT 0.55421686746988 BASEPAIR 25 FREE_ENERGY
  -31.64 LEN_BP_RATIO 3.32
AGGCUGCUAUGGAGGGACUCAAUUGGCCAGGAUUUGAUGGGACAGCCAUCAAGCGUUGACUGGUGU
UUUGUUCGGGGUCCACCAAAGGCAAGAGGAGGAGG
>random_seq_from_cds__NO_2453 RANDOM_LENGTH 87 SEQ_LENGTH 64
  GC_CONTENT 0.421875 BASEPAIR 20 FREE_ENERGY -15.09
  LEN_BP_RATIO 3.2
```

---

CCUUCACAUUUCCUUUCACUUUCACCAAGCCAGAAAUGAUACGAUUUGGCAGGUCAUCAUUUAAG  
GUUGGAUGCUGACUCAGAGCUC

>random\_seq\_from\_cds\_\_NO\_2465 RANDOM\_LENGTH 96 SEQ\_LENGTH 83  
GC\_CONTENT 0.662650602409639 BASEPAIR 31 FREE\_ENERGY  
-38.40 LEN\_BP\_RATIO 2.67741935483871

CCAGCCAAUCCCAGCCAUCCCCUGUGACUCCAAGAGUGGGGGCCAUACCCCUAAAAGCACUCCCU  
GGCCCAGGUGGGAGCAUGGGGCUGAAGAAUG

>random\_seq\_from\_cds\_\_NO\_2489 RANDOM\_LENGTH 97 SEQ\_LENGTH 80  
GC\_CONTENT 0.6375 BASEPAIR 30 FREE\_ENERGY -42.10  
LEN\_BP\_RATIO 2.66666666666667

UACGCCCAGGUGGCUCAGACAUGCUGCCUGCUCAGCAGAAGAUGGUGCCACUGCCAUUUGGUGAG  
CACCCCAGCAGGAGUAUGGCAUGGGCCCCAG

>random\_seq\_from\_cds\_\_NO\_2493 RANDOM\_LENGTH 86 SEQ\_LENGTH 55  
GC\_CONTENT 0.6 BASEPAIR 22 FREE\_ENERGY -23.10 LEN\_BP\_RATIO  
2.5

AACCUCAAGUCCCCCAGACUCCAUCGCAGCUGGCAGGCAUGCUGGCGGGCCAGCUGCUGCUGC  
UCCAUAAGUCCCCCCCUGU

>random\_seq\_from\_cds\_\_NO\_2518 RANDOM\_LENGTH 84 SEQ\_LENGTH 72  
GC\_CONTENT 0.638888888888889 BASEPAIR 23 FREE\_ENERGY  
-32.62 LEN\_BP\_RATIO 3.1304347826087

GGAGGUGGCACUGGGGGUGGGAAGGAGCCAGGAGGCAUGCCCUGGUGGAGGAAGCCAGACC  
CCAAUGAUGAUACCACAGG

>random\_seq\_from\_cds\_\_NO\_2547 RANDOM\_LENGTH 70 SEQ\_LENGTH 64  
GC\_CONTENT 0.5625 BASEPAIR 24 FREE\_ENERGY -26.20  
LEN\_BP\_RATIO 2.66666666666667

GGUCAACACUGGACGUAUGAGGGGCCACAUGGUCAGGACCAUUGGCCAGCCUCUUACCCUGAGU  
GUGGA

>random\_seq\_from\_cds\_\_NO\_2554 RANDOM\_LENGTH 85 SEQ\_LENGTH 67  
GC\_CONTENT 0.462686567164179 BASEPAIR 27 FREE\_ENERGY  
-24.20 LEN\_BP\_RATIO 2.48148148148148

AGUGUGCUCUGGACAGUUUUUAUAGAAGGUCCAGAUUUCAAUGGAACAGGCUGGAAAAGCUUC  
AGGGGACAUUGUUCUCCACA

>random\_seq\_from\_cds\_\_NO\_2556 RANDOM\_LENGTH 67 SEQ\_LENGTH 61  
GC\_CONTENT 0.540983606557377 BASEPAIR 20 FREE\_ENERGY  
-15.60 LEN\_BP\_RATIO 3.05

GGCAGGAUCCUCGUAUACCACAGGGUGAAAUGCUGAGUCUAGGUGUAGGAAUCUUGGUUGGCUGU  
CU

>random\_seq\_from\_cds\_\_NO\_2562 RANDOM\_LENGTH 71 SEQ\_LENGTH 58  
GC\_CONTENT 0.482758620689655 BASEPAIR 21 FREE\_ENERGY  
-20.50 LEN\_BP\_RATIO 2.76190476190476

UCCAUGGCUUUGUAGGGAUAGGAAGCGUCUGAGUCGAUGCCCUUGUUAUCAUGAUGUACUGGA  
AAGCCG

>random\_seq\_from\_cds\_\_NO\_2592 RANDOM\_LENGTH 98 SEQ\_LENGTH 78  
GC\_CONTENT 0.461538461538462 BASEPAIR 26 FREE\_ENERGY



---

-23.50 LEN\_BP\_RATIO 3  
GUGUUGCUUUUUGGGUCUUUAUGCUCCUGGGUAUAAGGAACUUUGAAGCACCAUGCUCCUUUAAGUCU  
UUAUUACCCUGUGGGUCAGUGUCUACCUCUCCC  
>random\_seq\_from\_cds\_\_NO\_2625 RANDOM\_LENGTH 106 SEQ\_LENGTH 97  
GC\_CONTENT 0.628865979381443 BASEPAIR 33 FREE\_ENERGY  
-37.00 LEN\_BP\_RATIO 2.93939393939394  
GGAUGUCCUUGGGUCUCAAUGACCCUUGUGCAGCUUUGGGGCCCGGGCUCAGAGCCCACGUCCAC  
CACAUAGAUGCGAGAGGAGAUGAGACUGGGCAGCACCAGCU  
>random\_seq\_from\_cds\_\_NO\_2629 RANDOM\_LENGTH 78 SEQ\_LENGTH 68  
GC\_CONTENT 0.647058823529412 BASEPAIR 24 FREE\_ENERGY  
-26.40 LEN\_BP\_RATIO 2.83333333333333  
AAGCGUUUUUGGGGUCGCGGUCCGACUUUGGGCGGGGGUCCGGCCCCAGGACAGUUUUACCGC  
AUUCCGUCCACUC  
>random\_seq\_from\_cds\_\_NO\_2630 RANDOM\_LENGTH 78 SEQ\_LENGTH 74  
GC\_CONTENT 0.608108108108108 BASEPAIR 27 FREE\_ENERGY  
-24.40 LEN\_BP\_RATIO 2.74074074074074  
CCGAUCCUUCAUUGGAUCCGGCGUCUGCACUUUACAGAGGUCCAUCACGCGGACCCAGGAACCC  
CAUGGUGACCGGG  
>random\_seq\_from\_cds\_\_NO\_2633 RANDOM\_LENGTH 88 SEQ\_LENGTH 73  
GC\_CONTENT 0.493150684931507 BASEPAIR 27 FREE\_ENERGY  
-29.42 LEN\_BP\_RATIO 2.7037037037037  
UUCUCGGCCAGAUGGUGGAUUGAUGAGGAGCUUCUGGGAGAUGGACACAGCUAUAGUCCUAGAGC  
UAUUCAUUCAUUGGCUGACCAGGG  
>random\_seq\_from\_cds\_\_NO\_2636 RANDOM\_LENGTH 97 SEQ\_LENGTH 68  
GC\_CONTENT 0.573529411764706 BASEPAIR 24 FREE\_ENERGY  
-25.50 LEN\_BP\_RATIO 2.83333333333333  
CAGUGCUAAGCCAGACCGAGGCCCGCGACUUAGUAGAACGUGCAUGCGAGUGCUGUACUACCGA  
GAUGCCCGUUCUUACAACCGGGUUUCAAUCG  
>random\_seq\_from\_cds\_\_NO\_2655 RANDOM\_LENGTH 100 SEQ\_LENGTH 85  
GC\_CONTENT 0.517647058823529 BASEPAIR 31 FREE\_ENERGY  
-27.91 LEN\_BP\_RATIO 2.74193548387097  
UGAGGACACUCGGUCUCUAGCAAUUUCUUCAGGUCAUCCCGUAGACGGCAUGGAAAUCCCCU  
UAUCAGGGAGUACUUGUGGUAGACGUCGAUGAUG  
>random\_seq\_from\_cds\_\_NO\_2674 RANDOM\_LENGTH 84 SEQ\_LENGTH 78  
GC\_CONTENT 0.474358974358974 BASEPAIR 25 FREE\_ENERGY  
-19.29 LEN\_BP\_RATIO 3.12  
AGUUUGAGUAUCGGACAUGUCAUGCUGCCCAAGGACAUAAGCAAGCUGGUCCUAAAACCCAUCU  
GAUGUCUGAAUCUGAAUGG  
>random\_seq\_from\_cds\_\_NO\_2675 RANDOM\_LENGTH 95 SEQ\_LENGTH 85  
GC\_CONTENT 0.576470588235294 BASEPAIR 27 FREE\_ENERGY  
-26.90 LEN\_BP\_RATIO 3.14814814814815  
AGGAAUCUUGGCGUUCAGCAGAGUCAGGGAUGGGUCCAUAUAUGAUGCAUGAACCAGGAACCUC  
ACAUCUUGCUGUCCGGCGCCCACUACCCA  
>random\_seq\_from\_cds\_\_NO\_2676 RANDOM\_LENGTH 85 SEQ\_LENGTH 69

---

```
GC_CONTENT    0.579710144927536    BASEPAIR    25    FREE_ENERGY
-24.00    LEN_BP_RATIO    2.76
AGAAACCAAAGAAAUGACUUAGCUCUCGGAGGCUACAGCCUCCCCGUCGCGGCUCUCCGUCUCCU
CCGGGAUGUCCUGCAUUCUG
>random_seq_from_cds__NO_2686    RANDOM_LENGTH    86    SEQ_LENGTH    79
GC_CONTENT    0.518987341772152    BASEPAIR    26    FREE_ENERGY
-23.41    LEN_BP_RATIO    3.03846153846154
CCUCCCUUCUUGCGGUGAUCUCAGCUGAUUUCCAUUUCGAUCCCCUCUGGCUAGAGUCUGAGUCAG
CUCUGCAGAGUUCAAUGGAGC
>random_seq_from_cds__NO_2689    RANDOM_LENGTH    68    SEQ_LENGTH    63
GC_CONTENT    0.682539682539683    BASEPAIR    20    FREE_ENERGY
-29.30    LEN_BP_RATIO    3.15
UCCUGCAGCAGCCGUCGCCACGAGGGGACUCAAGGGACUCAGAGCGGAAAAGGCCCCUGGGCAG
GGU
>random_seq_from_cds__NO_2698    RANDOM_LENGTH    82    SEQ_LENGTH    68
GC_CONTENT    0.661764705882353    BASEPAIR    24    FREE_ENERGY
-34.00    LEN_BP_RATIO    2.833333333333333
ACCAGCAGGAUGCACUCCUGUACCCCGUGCCGCUUGAGCACGGCGGGGCGGGUCACUUUCCCGGA
UGAAUUGCUGGAAGCGU
>random_seq_from_cds__NO_2703    RANDOM_LENGTH    87    SEQ_LENGTH    77
GC_CONTENT    0.480519480519481    BASEPAIR    22    FREE_ENERGY
-18.19    LEN_BP_RATIO    3.5
AUCUUCAGUGUCCUCAUUGGUGCAGCUCUGUCUGGAUUAGCUCCAUAGAUGACAUCUUGCUGCU
UCAUCACCUCCUUUUUAUGCUG
>random_seq_from_cds__NO_2706    RANDOM_LENGTH    70    SEQ_LENGTH    54
GC_CONTENT    0.462962962962963    BASEPAIR    19    FREE_ENERGY
-16.60    LEN_BP_RATIO    2.84210526315789
GCGCAGCCCCAGGGGAGACUCAUCAUUGAAAUGUCCAGCAAUGUUGGUGGUAGAAACACUCUUG
GCUAA
>random_seq_from_cds__NO_2721    RANDOM_LENGTH    110    SEQ_LENGTH    79
GC_CONTENT    0.379746835443038    BASEPAIR    25    FREE_ENERGY
-19.60    LEN_BP_RATIO    3.16
UGAUUUUCCAGUUGCCAGAGAAGUUGGGCAUAAUGGUGAAUGAAUACAAGAAAAUUCUUUUGCUG
AAAGGAUUUGAGCUCAUGGAUGAUUAUCAUUUUAUCAUAAUUAAG
>random_seq_from_cds__NO_2726    RANDOM_LENGTH    89    SEQ_LENGTH    75
GC_CONTENT    0.586666666666667    BASEPAIR    24    FREE_ENERGY
-20.10    LEN_BP_RATIO    3.125
CAAAAAGAAUAAGGUGUCCCAAGAGCAGAGUAAGCCCCAGGUCCUCAGGAGCCAGCACAUUCG
CAGCUGUGGAUCAUCCCCACUAC
>random_seq_from_cds__NO_2742    RANDOM_LENGTH    72    SEQ_LENGTH    61
GC_CONTENT    0.508196721311475    BASEPAIR    23    FREE_ENERGY
-21.90    LEN_BP_RATIO    2.65217391304348
UUCUUGGGUCUCAAACGUGAAGGGCUUCUUUGCUUUCAGUACCAUAACUGGCAAACAGCGCUUCU
GAAACCC
```

---

```
>random_seq_from_cds__NO_2743 RANDOM_LENGTH 89 SEQ_LENGTH 75
  GC_CONTENT 0.5066666666666667 BASEPAIR 25 FREE_ENERGY
-25.10 LEN_BP_RATIO 3
UUCUCUGAUAGAUUCCUGCUGGGCCACCAUCUGUUUCUGUUCAGGCCUUAACAUGAGGAGAGACU
UUUGGUGCAGCACGUUGCUUUGCG
>random_seq_from_cds__NO_2756 RANDOM_LENGTH 90 SEQ_LENGTH 75
  GC_CONTENT 0.64 BASEPAIR 26 FREE_ENERGY -30.50
  LEN_BP_RATIO 2.88461538461538
ACCCUUGGUGUGGGUCUGAAUCAGAGGAUCUGGCGUGGCAUCCCGUAGCCAGUCAUGCCUGCCUG
AGACGCCCCGCGGUUGGUGCCCAUC
>random_seq_from_cds__NO_2757 RANDOM_LENGTH 110 SEQ_LENGTH 87
  GC_CONTENT 0.540229885057471 BASEPAIR 34 FREE_ENERGY
-36.10 LEN_BP_RATIO 2.55882352941176
UGUAACCCGAUCACGUUCUUGCCCUCUUGCAGCUGGUUAUCCGAGAAGUUCGAGGAUUCUCCUU
GGAUUUCCUUAGGGAACCAGUUGGGAUCCCCAGAGAAGAGCCCAU
>random_seq_from_cds__NO_2766 RANDOM_LENGTH 75 SEQ_LENGTH 63
  GC_CONTENT 0.53968253968254 BASEPAIR 24 FREE_ENERGY
-25.90 LEN_BP_RATIO 2.625
AGCUGAUCCUGGAGGUUAGCAGCCCAAGUCCUAGAAGACAAGGGUGUUGGCUUCGGGCUGGUAGA
CUCUGAGAAG
>random_seq_from_cds__NO_2795 RANDOM_LENGTH 109 SEQ_LENGTH 64
  GC_CONTENT 0.46875 BASEPAIR 24 FREE_ENERGY -24.40
  LEN_BP_RATIO 2.666666666666667
CUUCUUCUCCUCUUCUCCUCUUCUCCUCUGAGCGGUCAUGGACUCGAUUUUCAUCAUAAUGGAGUAA
UGACCAGUGUCCUCAUGCUGUCAGAGUCCUUAUCUUCACCUGA
>random_seq_from_cds__NO_2796 RANDOM_LENGTH 86 SEQ_LENGTH 60
  GC_CONTENT 0.6 BASEPAIR 20 FREE_ENERGY -22.90 LEN_BP_RATIO
3
GCUCUCUGUGUCUGUGCCUCGACUUCUGUGCUGGUGCGGUUGGGGCCACCAUCAUCCCAGUCA
AGCUCAAACUCAGGUCUGAGG
>random_seq_from_cds__NO_2801 RANDOM_LENGTH 87 SEQ_LENGTH 74
  GC_CONTENT 0.608108108108108 BASEPAIR 28 FREE_ENERGY
-34.90 LEN_BP_RATIO 2.64285714285714
GAUUUUUCGGGUCCUGUUGGGCCACCUCAGGCUUGGGCCGAGUUCUAGUAGGCGCCGAGCAAAG
GUGGCAGCUGUCUUGAAGUUCU
>random_seq_from_cds__NO_2802 RANDOM_LENGTH 72 SEQ_LENGTH 56
  GC_CONTENT 0.535714285714286 BASEPAIR 21 FREE_ENERGY
-22.00 LEN_BP_RATIO 2.666666666666667
UGAGCUUGAAGAACAGAUUGAGGGCUGUACGCAGCACCAGGAUCAUGUGCACAGGCUGCAGGUUU
GAGUGGG
>random_seq_from_cds__NO_2809 RANDOM_LENGTH 87 SEQ_LENGTH 67
  GC_CONTENT 0.582089552238806 BASEPAIR 26 FREE_ENERGY
-29.00 LEN_BP_RATIO 2.57692307692308
CAGAUCCUGAGUUGGACUUGUUCUCCUUGGUUGGGGGCACAAAGAAACCAUCUUCAGCCCCACCAG
```

---

CUGCCCCAGGGGAUUAUCCCA  
>random\_seq\_from\_cds\_\_NO\_2813 RANDOM\_LENGTH 77 SEQ\_LENGTH 70  
GC\_CONTENT 0.5 BASEPAIR 24 FREE\_ENERGY -16.50 LEN\_BP\_RATIO  
2.91666666666667  
AGCAGCUUGGCAUUAGGGUCA AUGUCUGGGAUCUGUCUCCUUCUCUGGGUCA AUGUCUCCUUUA  
GGCUCUCAGCUU  
>random\_seq\_from\_cds\_\_NO\_2814 RANDOM\_LENGTH 89 SEQ\_LENGTH 68  
GC\_CONTENT 0.529411764705882 BASEPAIR 25 FREE\_ENERGY  
-19.60 LEN\_BP\_RATIO 2.72  
CUUCAUCUAAGCCAUGGGUAGCAGCUGUGAGAUAGGCCAGGACUCUCUGUCCACAGUUCUUCAG  
GAUCCGCACACGCUCUGACACAUC  
>random\_seq\_from\_cds\_\_NO\_2822 RANDOM\_LENGTH 81 SEQ\_LENGTH 69  
GC\_CONTENT 0.463768115942029 BASEPAIR 20 FREE\_ENERGY  
-15.27 LEN\_BP\_RATIO 3.45  
GACAGCAUUAUUUGAUGUGGUUGCUUGUGGUUAUAGAUAAAUACCCACUCUCAUCCAGGCCCCAC  
UCUUGACACGAAUGUU  
>random\_seq\_from\_cds\_\_NO\_2823 RANDOM\_LENGTH 87 SEQ\_LENGTH 76  
GC\_CONTENT 0.447368421052632 BASEPAIR 29 FREE\_ENERGY  
-24.00 LEN\_BP\_RATIO 2.62068965517241  
CUCAUGAAUGUUACAUAAGCAUCCAGUUUGCGGUACAGAUCAAAUGGCCGUGUUUGGCUAGU  
AGUGCUACAUGUGACAUGUCUG  
>random\_seq\_from\_cds\_\_NO\_2830 RANDOM\_LENGTH 86 SEQ\_LENGTH 77  
GC\_CONTENT 0.506493506493506 BASEPAIR 22 FREE\_ENERGY  
-21.95 LEN\_BP\_RATIO 3.5  
UAGCAUAUUGCCAUGAACAGCAUAGGCUGGCCGUUCCCGUCCAGCUUAAACACAAUCAUACCAC  
CAUCAUGGCCUGCUGCAAAG  
>random\_seq\_from\_cds\_\_NO\_2834 RANDOM\_LENGTH 70 SEQ\_LENGTH 49  
GC\_CONTENT 0.591836734693878 BASEPAIR 20 FREE\_ENERGY  
-24.00 LEN\_BP\_RATIO 2.45  
AGGGGCAUAGUGGGUGGAAGGCAGCCAGUUUACUCCACGAUCGUGACCCCUUAGUACAUGCU  
UCACC  
>random\_seq\_from\_cds\_\_NO\_2842 RANDOM\_LENGTH 80 SEQ\_LENGTH 72  
GC\_CONTENT 0.458333333333333 BASEPAIR 23 FREE\_ENERGY  
-15.50 LEN\_BP\_RATIO 3.1304347826087  
CUUCUGAGUUUCCUUGGCUGCUGGCCUUCUCAUCUUCUCCCAUGAGACGAAUGUUGGCUUUUCC  
CGGAAUUCAUUUAGU  
>random\_seq\_from\_cds\_\_NO\_2845 RANDOM\_LENGTH 97 SEQ\_LENGTH 86  
GC\_CONTENT 0.546511627906977 BASEPAIR 33 FREE\_ENERGY  
-26.00 LEN\_BP\_RATIO 2.60606060606061  
UCCUUCAGUGUAUCGAUCACUAGGCCUGUGCUCAUUAACUCCAUCUCCAACUCAGCUGCUUUGG  
AUGCCAGGCCUCGCUGUCCUGCCGAAGGCGG  
>random\_seq\_from\_cds\_\_NO\_2854 RANDOM\_LENGTH 81 SEQ\_LENGTH 63  
GC\_CONTENT 0.603174603174603 BASEPAIR 20 FREE\_ENERGY  
-19.70 LEN\_BP\_RATIO 3.15

CAUGGCGGGGUCCCCGGGGGUCACACACAUACAGAUUGUGGUCAUUUUCUGGCAAGAGGUCCACA  
UCGUGCAAGAACAGGC

>random\_seq\_from\_cds\_\_NO\_2856 RANDOM\_LENGTH 110 SEQ\_LENGTH 91  
GC\_CONTENT 0.659340659340659 BASEPAIR 28 FREE\_ENERGY  
-38.00 LEN\_BP\_RATIO 3.25

UGUCCAUUUCCAGCCCUGGUGGAUGACAUAAGAUGCCAUAAGCAAGCUGCUGGGCGUGCAAGAAG  
GGGUGCAGGUGGUAGAGCAGCAGGCGCAGGUGGUGCUCCGGGCA

>random\_seq\_from\_cds\_\_NO\_2862 RANDOM\_LENGTH 82 SEQ\_LENGTH 59  
GC\_CONTENT 0.576271186440678 BASEPAIR 20 FREE\_ENERGY  
-22.01 LEN\_BP\_RATIO 2.95

UUGGUUGAACAAAGCAGGCGGCCUUGGGAGAGCCUCAGCUCUGCUAUAUCCUGGAUGCCAUCCUGU  
UUCUGUAUGGAAUUGUC

>random\_seq\_from\_cds\_\_NO\_2864 RANDOM\_LENGTH 81 SEQ\_LENGTH 60  
GC\_CONTENT 0.533333333333333 BASEPAIR 22 FREE\_ENERGY  
-21.20 LEN\_BP\_RATIO 2.72727272727273

GACUUACGAGACUCUGAAGCAUGAGAAAACCACCACAGUAGUUCACUGGGUGGCAGGCUGUGUUC  
AAGUCCACGAAAUAG

>random\_seq\_from\_cds\_\_NO\_2873 RANDOM\_LENGTH 68 SEQ\_LENGTH 63  
GC\_CONTENT 0.634920634920635 BASEPAIR 24 FREE\_ENERGY  
-28.50 LEN\_BP\_RATIO 2.625

GUGUUGUCCUCUAUGGGGUGGCAGCCAUGUGACAUGUUGGAGGCUCGGGCCGAGUGAUGGCU  
GCG

>random\_seq\_from\_cds\_\_NO\_2887 RANDOM\_LENGTH 84 SEQ\_LENGTH 62  
GC\_CONTENT 0.580645161290323 BASEPAIR 20 FREE\_ENERGY  
-22.24 LEN\_BP\_RATIO 3.1

CAGCUGCCAAUAUGGAAGGGCUGGACUCAGAAGAAGGGGAUGGAGCCUGGUGCCCUGAGAUUC  
AGUGGAACCGAUGACCUG

>random\_seq\_from\_cds\_\_NO\_2902 RANDOM\_LENGTH 80 SEQ\_LENGTH 66  
GC\_CONTENT 0.575757575757576 BASEPAIR 24 FREE\_ENERGY  
-22.80 LEN\_BP\_RATIO 2.75

GCUGACAUAUGAACCUCCAAGGAGUGACAGGAGGCAACACAUACUCAGUGCCUGCCGUCACCAU  
GGACCUGCUCUCAGG

>random\_seq\_from\_cds\_\_NO\_2903 RANDOM\_LENGTH 82 SEQ\_LENGTH 51  
GC\_CONTENT 0.509803921568627 BASEPAIR 19 FREE\_ENERGY  
-20.80 LEN\_BP\_RATIO 2.68421052631579

AAAAGAUGUGGCUGUGGAGGAGUCCCCAGGAAACUCCUAACUUUCAAGAGAAGCUGGGAGAAG  
GACAGUUUGGGGAGGGU

>random\_seq\_from\_cds\_\_NO\_2914 RANDOM\_LENGTH 98 SEQ\_LENGTH 79  
GC\_CONTENT 0.468354430379747 BASEPAIR 28 FREE\_ENERGY  
-29.70 LEN\_BP\_RATIO 2.82142857142857

AUAUGGUUUUGUGCUUCUAACUGGUGCUGCCAGCUUUAUAUGGUGGCCACCUAGCCAUCAUG  
UUCCAAGGCCCGCAAGAAGUACAAAGUGGAGG

>random\_seq\_from\_cds\_\_NO\_2921 RANDOM\_LENGTH 89 SEQ\_LENGTH 66  
GC\_CONTENT 0.515151515151515 BASEPAIR 24 FREE\_ENERGY

---

-20.10 LEN\_BP\_RATIO 2.75  
CCCGUUGGAUGUCCCCUGGUAAAAGACGCCAGCUGCUAGUCCAAAAGUGGUUAUCAUUGGCUCUUUC  
UAGAACCUCAGCUUCAGUGUCAAAA  
>random\_seq\_from\_cds\_\_NO\_2938 RANDOM\_LENGTH 82 SEQ\_LENGTH 56  
GC\_CONTENT 0.607142857142857 BASEPAIR 20 FREE\_ENERGY  
-18.90 LEN\_BP\_RATIO 2.8  
UACCGUGUCCUUACCUCGGAGCAGAAGGCCAAAGCCCUGAAGGGCCAGUUCAACUUUGACCACCC  
GGGAUGCCUUUGACAAU  
>random\_seq\_from\_cds\_\_NO\_2974 RANDOM\_LENGTH 83 SEQ\_LENGTH 73  
GC\_CONTENT 0.493150684931507 BASEPAIR 26 FREE\_ENERGY  
-22.90 LEN\_BP\_RATIO 2.80769230769231  
ACUGUGAAGUGAUGAUAGGGAAUGAAGUCCCUGCCUCGGCAGUGGUCACAUCUGUGGGCAUCUUUC  
UUCUAAAAAGCGGGCACA  
>random\_seq\_from\_cds\_\_NO\_2975 RANDOM\_LENGTH 81 SEQ\_LENGTH 54  
GC\_CONTENT 0.481481481481481 BASEPAIR 20 FREE\_ENERGY  
-17.60 LEN\_BP\_RATIO 2.7  
UUUCAAGUGCAUGGCUUUUCUCUGGUCCUUGAGCCACAGCUCGUAGGCUGUUUUCUGCAUCAUAG  
GGUUACAGAAUCGAAU  
>random\_seq\_from\_cds\_\_NO\_2980 RANDOM\_LENGTH 86 SEQ\_LENGTH 69  
GC\_CONTENT 0.463768115942029 BASEPAIR 26 FREE\_ENERGY  
-23.30 LEN\_BP\_RATIO 2.65384615384615  
UUUCCUUUUAAUGACGUUGGAGGUGACAGGUUUUUCAGUCUGACACCACUUGUGAGGUGACAGAC  
UUCUUCACUUUCCUUAUCACU  
>random\_seq\_from\_cds\_\_NO\_2981 RANDOM\_LENGTH 84 SEQ\_LENGTH 64  
GC\_CONTENT 0.390625 BASEPAIR 24 FREE\_ENERGY -17.80  
LEN\_BP\_RATIO 2.66666666666667  
AUGGAGAGUAACCAUGUUUAACUUCUCUGUUAGCUUAAUGGAAUACUCUGAACAGGUUAUUCAG  
GUCCUAUUUGUCUUUUCU  
>random\_seq\_from\_cds\_\_NO\_2997 RANDOM\_LENGTH 72 SEQ\_LENGTH 48  
GC\_CONTENT 0.5 BASEPAIR 19 FREE\_ENERGY -21.50 LEN\_BP\_RATIO  
2.52631578947368  
GACAGAAGUGAUGUGCAUAUAGGCAUCCUGGAUGGCUGGGCCUAUCUCUUCUGCUUUGUCUUGGU  
CUUCAAA  
>random\_seq\_from\_cds\_\_NO\_3009 RANDOM\_LENGTH 66 SEQ\_LENGTH 54  
GC\_CONTENT 0.555555555555556 BASEPAIR 19 FREE\_ENERGY  
-19.10 LEN\_BP\_RATIO 2.84210526315789  
AAGGCGACCCUACGGAGAAGCAACUUCAGAUCAUCCUGGAGGAUGCACCUCUCUGGCAGAGAUUC  
A  
>random\_seq\_from\_cds\_\_NO\_3011 RANDOM\_LENGTH 71 SEQ\_LENGTH 52  
GC\_CONTENT 0.557692307692308 BASEPAIR 20 FREE\_ENERGY  
-20.80 LEN\_BP\_RATIO 2.6  
CCCCAAUGCCAUGUACUCCCUCUGCUGGACUUUGUCCCUACGGACAGUCACCGCUGGAAGUACG  
UCAACG  
>random\_seq\_from\_cds\_\_NO\_3017 RANDOM\_LENGTH 72 SEQ\_LENGTH 62

---

GC\_CONTENT 0.661290322580645 BASEPAIR 20 FREE\_ENERGY  
-19.00 LEN\_BP\_RATIO 3.1  
UGCCGCUCUCUGCCUCUGCCUGCCCCACACCCACCAUGGCUGUGAGCACUAUUCGGGUCUC  
GAGGACA  
>random\_seq\_from\_cds\_\_NO\_3023 RANDOM\_LENGTH 81 SEQ\_LENGTH 66  
GC\_CONTENT 0.696969696969697 BASEPAIR 26 FREE\_ENERGY  
-29.60 LEN\_BP\_RATIO 2.53846153846154  
CACCUGGACAGCAGUGGCCUCGCAUCCCUUCGCGGGCUGGGGUGGCCAGGAGCGGGUGGGCACC  
AUUCUCCUUCUCACU  
>random\_seq\_from\_cds\_\_NO\_3031 RANDOM\_LENGTH 70 SEQ\_LENGTH 57  
GC\_CONTENT 0.421052631578947 BASEPAIR 19 FREE\_ENERGY  
-16.90 LEN\_BP\_RATIO 3  
AUUCCUUGUGCUGUCCCUUGAAGAUCUGCCAGUUGAUCUGGUUGGAACUGUAAGCUACAUAGA  
ACUCU  
>random\_seq\_from\_cds\_\_NO\_3040 RANDOM\_LENGTH 73 SEQ\_LENGTH 61  
GC\_CONTENT 0.491803278688525 BASEPAIR 19 FREE\_ENERGY  
-20.00 LEN\_BP\_RATIO 3.21052631578947  
CAUAGGCAUGUUGCUGUCCUUAUGUAGUAUUCUUUUUGGCAGAUUAGGAGGGGACCUAUCAAGC  
CUGAGUGA  
>random\_seq\_from\_cds\_\_NO\_3048 RANDOM\_LENGTH 102 SEQ\_LENGTH 57  
GC\_CONTENT 0.456140350877193 BASEPAIR 21 FREE\_ENERGY  
-15.91 LEN\_BP\_RATIO 2.71428571428571  
UAACAUCAGUUUUGUAGGGGUCAUCAUAGGGCACAAUUAUUCAGCAUAGUCAUCUUCACUG  
CUCUGGACCUCUCCUUUGGAAUGAUCUCAAUGUAAU  
>random\_seq\_from\_cds\_\_NO\_3058 RANDOM\_LENGTH 81 SEQ\_LENGTH 72  
GC\_CONTENT 0.513888888888889 BASEPAIR 20 FREE\_ENERGY  
-21.90 LEN\_BP\_RATIO 3.6  
GUCUGGCUGAGGUCUAAAGAAAGGGUUGUAUGGCUGAGGUCUGGAGAAAGGGUUGUAUGGCUGAG  
GUCUGGAGAAAUGGGC  
>random\_seq\_from\_cds\_\_NO\_3059 RANDOM\_LENGTH 86 SEQ\_LENGTH 67  
GC\_CONTENT 0.552238805970149 BASEPAIR 25 FREE\_ENERGY  
-20.90 LEN\_BP\_RATIO 2.68  
AUCUGACCGAGGGCUGGGGAAAGGUUCUCUGAAUGAGUUCUGGAGAGAGAGUCGUGUGGCUGAG  
GUCUGGAGAGAGGUUUGUCUG  
>random\_seq\_from\_cds\_\_NO\_3063 RANDOM\_LENGTH 83 SEQ\_LENGTH 59  
GC\_CONTENT 0.525423728813559 BASEPAIR 23 FREE\_ENERGY  
-26.50 LEN\_BP\_RATIO 2.56521739130435  
UCUGAUAAAGACCUGGAGGACAGCUUGCCUGACCAGUGUCAUUGAGGAAUUCUGAUUAUGGUCA  
GGAAGUGAGGCUAUCCAG  
>random\_seq\_from\_cds\_\_NO\_3077 RANDOM\_LENGTH 84 SEQ\_LENGTH 49  
GC\_CONTENT 0.448979591836735 BASEPAIR 20 FREE\_ENERGY  
-16.50 LEN\_BP\_RATIO 2.45  
CAUAGUCAGCAUCACUCUCUUAUCUUCAGGUUCUAAACGAUCAUGCAUUUCCGUGUAGCCAUG  
ACUGUAGAUUCUGGAGGUU

---

```
>random_seq_from_cds__NO_3105 RANDOM_LENGTH 87 SEQ_LENGTH 58
  GC_CONTENT 0.482758620689655 BASEPAIR 24 FREE_ENERGY
  -25.40 LEN_BP_RATIO 2.416666666666667
CCCCAGAGGUUGGAGCAGUUCAUCGCUAUUGGCUUAUUAACAUGUAGUUCUGAGCAUUCACAGC
CUCUGCAUGCUGGAGUUACUGC
>random_seq_from_cds__NO_3107 RANDOM_LENGTH 87 SEQ_LENGTH 79
  GC_CONTENT 0.569620253164557 BASEPAIR 27 FREE_ENERGY
  -27.70 LEN_BP_RATIO 2.92592592592593
GCCUACAGUACAUGGUUCCCUGCCCAGGAGUGGUGAGGGCUGGACAUUGCACCCCUGGAGUAGGA
AGUGAUGCUAUGCCCUUUGCAG
>random_seq_from_cds__NO_3117 RANDOM_LENGTH 95 SEQ_LENGTH 73
  GC_CONTENT 0.616438356164384 BASEPAIR 19 FREE_ENERGY
  -26.25 LEN_BP_RATIO 3.84210526315789
CAGGUUGGCAAGGGUGCAGACCAGUGUCCAGAGUCAAUUGCAGCGGAGCAUGUCCAAGCCCUCAC
UCUGUAGCCGGGCGGCACUCAAAUUUACA
>random_seq_from_cds__NO_3122 RANDOM_LENGTH 66 SEQ_LENGTH 49
  GC_CONTENT 0.591836734693878 BASEPAIR 20 FREE_ENERGY
  -19.60 LEN_BP_RATIO 2.45
CAGAAGCCAAGCAUUCAGCUUGCUGGGCCCAUUUACUUGGUACCCGUCAGUGCAGUGGAAGCUG
C
>random_seq_from_cds__NO_3127 RANDOM_LENGTH 97 SEQ_LENGTH 82
  GC_CONTENT 0.51219512195122 BASEPAIR 25 FREE_ENERGY
  -21.40 LEN_BP_RATIO 3.28
UUGUUGUAGGUUCAUUAUCAGCCAGUUCUCAGCCUCGUUGGUGAGAGCCUUUUUGGUUCCCAC
CCAUGUCCAUGUCUUAUUGUUCUUUCGGAUCC
>random_seq_from_cds__NO_3128 RANDOM_LENGTH 81 SEQ_LENGTH 63
  GC_CONTENT 0.365079365079365 BASEPAIR 24 FREE_ENERGY
  -19.20 LEN_BP_RATIO 2.625
CAAUCCAGUAGUAGGAGCUGUAGUAGGGUAGGACCUUAUUGAGGUAUAUCAAUUUCAUUUUUAUUC
UGGAUGGCCACUAAGU
>random_seq_from_cds__NO_3129 RANDOM_LENGTH 77 SEQ_LENGTH 50
  GC_CONTENT 0.44 BASEPAIR 19 FREE_ENERGY -15.90
  LEN_BP_RATIO 2.63157894736842
CUGUGUAGCGAUUCUGGCAGUAUUUACGGGAAAUAUCCAUGAGUAUGC UUUUGUGCUGUA AUGA
UAAGUCCAUGCU
>random_seq_from_cds__NO_3145 RANDOM_LENGTH 81 SEQ_LENGTH 74
  GC_CONTENT 0.445945945945946 BASEPAIR 23 FREE_ENERGY
  -22.41 LEN_BP_RATIO 3.21739130434783
UUAAAGGAUGUAAGAAGGCUUUUGGUAGCUUCCAUCUGAUUCAAGGCUUUGGCAGCUGCCUGGCA
GGAACAAAUUUCUUUG
>random_seq_from_cds__NO_3147 RANDOM_LENGTH 79 SEQ_LENGTH 61
  GC_CONTENT 0.60655737704918 BASEPAIR 22 FREE_ENERGY
  -27.60 LEN_BP_RATIO 2.77272727272727
CAAGGGAAUGUUGGACUCAGUGGGAGCCUUCACAGGUAGGUAGCAGGCCAGACCAGUGUCCUGUG
```



```
GCUCCACAUGUCCG
>random_seq_from_cds__NO_3153 RANDOM_LENGTH 70 SEQ_LENGTH 51
  GC_CONTENT 0.568627450980392 BASEPAIR 20 FREE_ENERGY
  -18.60 LEN_BP_RATIO 2.55
GGAUUUGCUGUGUCCACUGCCCUUGAGUGGUGCAUUAACCUGGCUGGUCCUGCAACAUGAAG
CCUUC
>random_seq_from_cds__NO_3164 RANDOM_LENGTH 97 SEQ_LENGTH 72
  GC_CONTENT 0.527777777777778 BASEPAIR 22 FREE_ENERGY
  -19.80 LEN_BP_RATIO 3.27272727272727
CAGGUGUGUGUACCUUUGCUGACAAUAAGCACUGGCCUCAUCAUAAGUCAUAGCUUCCGUGGAGG
UGUUGUAAGACCAGGCUCCACUCUCUUUAUG
>random_seq_from_cds__NO_3166 RANDOM_LENGTH 70 SEQ_LENGTH 52
  GC_CONTENT 0.557692307692308 BASEPAIR 19 FREE_ENERGY
  -16.70 LEN_BP_RATIO 2.73684210526316
UGAUUGGAGCUGGGUCAGUGGCCUAAUUUCUCUGAAGUCUGUGUGGAUGAGGGACUUGAGCCC
ACUUG
>random_seq_from_cds__NO_3175 RANDOM_LENGTH 90 SEQ_LENGTH 56
  GC_CONTENT 0.410714285714286 BASEPAIR 21 FREE_ENERGY
  -15.70 LEN_BP_RATIO 2.66666666666667
GAACAACAGAUGAAUCGGUGGUUCAACCAUGAAAUAUGGCCUUGAGCCUCAAAAACAAGAUACA
UUAUGAAGGAACCUGUACUAAAUGA
>random_seq_from_cds__NO_3186 RANDOM_LENGTH 74 SEQ_LENGTH 63
  GC_CONTENT 0.507936507936508 BASEPAIR 24 FREE_ENERGY
  -21.30 LEN_BP_RATIO 2.625
AAAAUGCUCAGAUUCUGCUGUCUCUGGCCAAUGGGAGGUGGUCACUAUGCAUGAAGAGAAGCAAG
AGUCAGCCA
>random_seq_from_cds__NO_3233 RANDOM_LENGTH 97 SEQ_LENGTH 69
  GC_CONTENT 0.739130434782609 BASEPAIR 26 FREE_ENERGY
  -37.57 LEN_BP_RATIO 2.65384615384615
GUUUCAGCUGGUCCCGCUCGCCUCAGGGUGCCAGCUCUCCUCUGCAGCCCCUCCUGGGUCUC
CUGGGGCCUGGCAGCCUGGUCCAAGGUCAAUU
>random_seq_from_cds__NO_3236 RANDOM_LENGTH 80 SEQ_LENGTH 62
  GC_CONTENT 0.693548387096774 BASEPAIR 23 FREE_ENERGY
  -28.62 LEN_BP_RATIO 2.69565217391304
GCCUUCUGAGCUGAGCUGUCCUGGCCCCCAUCCACACCAGGCAGGCCAGAAGCAGCAGCUG
GACAGCUGGCAUCUC
>random_seq_from_cds__NO_3249 RANDOM_LENGTH 86 SEQ_LENGTH 69
  GC_CONTENT 0.565217391304348 BASEPAIR 23 FREE_ENERGY
  -20.80 LEN_BP_RATIO 3
UCUACAUGUGACUUCGAACUUGGCCUGAAGCUGAUGAAGGAACCAUCCUGCUUGAACGUCGCA
GCAGCGAGCCCAGCAUGAAGG
>random_seq_from_cds__NO_3254 RANDOM_LENGTH 87 SEQ_LENGTH 63
  GC_CONTENT 0.587301587301587 BASEPAIR 23 FREE_ENERGY
  -23.71 LEN_BP_RATIO 2.73913043478261
```

AGAGACUUCAACAUCCUGGCUUCCCGACUGUGAGGGUUCUUCAAGGCCUUUACCAAGAACGGCU  
CGGGAGCAGUAUUUCCAGGUGG

>random\_seq\_from\_cds\_\_NO\_3258 RANDOM\_LENGTH 81 SEQ\_LENGTH 74  
GC\_CONTENT 0.567567567567568 BASEPAIR 22 FREE\_ENERGY  
-21.70 LEN\_BP\_RATIO 3.36363636363636

CCUGCUGUCCGAAUGGCUCUGUCUCCCGAGUCCCGUGGCUCAUGGAAUCCAGGUCCUUCUAU  
ACCGCUUACCGCAGA

>random\_seq\_from\_cds\_\_NO\_3274 RANDOM\_LENGTH 80 SEQ\_LENGTH 60  
GC\_CONTENT 0.583333333333333 BASEPAIR 23 FREE\_ENERGY  
-33.00 LEN\_BP\_RATIO 2.60869565217391

GGCUCUAUCCUGUCCUUAUGGGCCUGCUGGCCAUGUACACCUACUCCAGGCCAAGUAAGG  
GCCCUGAAGGGCCAU

>random\_seq\_from\_cds\_\_NO\_3278 RANDOM\_LENGTH 90 SEQ\_LENGTH 61  
GC\_CONTENT 0.688524590163934 BASEPAIR 23 FREE\_ENERGY  
-28.90 LEN\_BP\_RATIO 2.65217391304348

GGUCACCAAGUCCUGUCACCGUGCGACGCCGGCAGCCCACCUGCAGCACGGGGCAGCCUCC  
UGACCGACUACAACAACCAGGCCGA

>random\_seq\_from\_cds\_\_NO\_3302 RANDOM\_LENGTH 92 SEQ\_LENGTH 81  
GC\_CONTENT 0.530864197530864 BASEPAIR 29 FREE\_ENERGY  
-21.50 LEN\_BP\_RATIO 2.79310344827586

ACUAUGGAGAUUCAACUGCAGGCACCUCCGGAUUGCCAACCCUGUCCGUGUCCUGGAGGUUCA  
AGUUGUGCUGUUGUCCCAAGACAAAG

>random\_seq\_from\_cds\_\_NO\_3308 RANDOM\_LENGTH 70 SEQ\_LENGTH 58  
GC\_CONTENT 0.637931034482759 BASEPAIR 21 FREE\_ENERGY  
-21.30 LEN\_BP\_RATIO 2.76190476190476

UCUGCAGAGUGGGCAAGGCUGUGAGAGGGUGUGACUGCCAUGCCUUGGGCUCCACCAAUGGGCAG  
UGUGA

>random\_seq\_from\_cds\_\_NO\_3312 RANDOM\_LENGTH 88 SEQ\_LENGTH 71  
GC\_CONTENT 0.47887323943662 BASEPAIR 22 FREE\_ENERGY  
-20.30 LEN\_BP\_RATIO 3.22727272727273

CAGGAAUAGAGAGUCUCAUAGCAAACCUUGGAACUGGGGAUGAGAUGGUGACAGAUAAGCCUU  
CGAGGAUAGACUAAAGGAAGCAG

>random\_seq\_from\_cds\_\_NO\_3328 RANDOM\_LENGTH 110 SEQ\_LENGTH 85  
GC\_CONTENT 0.505882352941176 BASEPAIR 27 FREE\_ENERGY  
-24.20 LEN\_BP\_RATIO 3.14814814814815

CAAGAAGCCGAGAUCAAUGCCAGAAAAGCCAAAAACUCUGUJACUAGCCUCCUCAGCAUUAUUA  
UGACCUCUUGGAGCAGCUGGGGGCAGCUGGAUACAGUGGACCUGA

>random\_seq\_from\_cds\_\_NO\_3331 RANDOM\_LENGTH 89 SEQ\_LENGTH 78  
GC\_CONTENT 0.538461538461538 BASEPAIR 24 FREE\_ENERGY  
-17.50 LEN\_BP\_RATIO 3.25

CCAUCUGGCUGCUUCAACACCCGUCCAUGAAAAGCCCUAGCCUAGACUUCUCUCCGAGUGCUU  
UCCAAAUCUGUAGUUGCGCAGUCU

>random\_seq\_from\_cds\_\_NO\_3334 RANDOM\_LENGTH 88 SEQ\_LENGTH 79  
GC\_CONTENT 0.455696202531646 BASEPAIR 27 FREE\_ENERGY

---

-18.30 LEN\_BP\_RATIO 2.92592592592593  
UGCCUCCACUUGGCUGCCUUUCUUAAGCUGAGGUUCUGUUGUCUGGUUAAUAGCAUCAGCUUUUU  
CACUUCCUUGGGUUAUCUGGA  
>random\_seq\_from\_cds\_\_NO\_3360 RANDOM\_LENGTH 83 SEQ\_LENGTH 60  
GC\_CONTENT 0.5 BASEPAIR 20 FREE\_ENERGY -22.50 LEN\_BP\_RATIO  
3  
UACUUCUAUGCCUUUGUUGCAUCGGGCUGCAGCUCCUUGCCACUGCAGCUACAACAAUUCUGGCU  
GCUAGUCCUUGUAAU  
>random\_seq\_from\_cds\_\_NO\_3377 RANDOM\_LENGTH 78 SEQ\_LENGTH 70  
GC\_CONTENT 0.442857142857143 BASEPAIR 20 FREE\_ENERGY  
-18.00 LEN\_BP\_RATIO 3.5  
AGGAUUUAUCAAGCUGUGCAGGGAGAUGUGGGGAAGGGUAAUUCUAGAGAUGCCACCUGCAACUGU  
GAUUUAACUGUC  
>random\_seq\_from\_cds\_\_NO\_3417 RANDOM\_LENGTH 80 SEQ\_LENGTH 57  
GC\_CONTENT 0.473684210526316 BASEPAIR 22 FREE\_ENERGY  
-16.63 LEN\_BP\_RATIO 2.59090909090909  
GCAUUCGAGGGUCAUUUUUCUGGAUGCUAAGUCCAUCAGUCCACCAUCUCCAGCUCGCAGAA  
UUACUGAAGUUUGG  
>random\_seq\_from\_cds\_\_NO\_3419 RANDOM\_LENGTH 95 SEQ\_LENGTH 81  
GC\_CONTENT 0.469135802469136 BASEPAIR 29 FREE\_ENERGY  
-18.90 LEN\_BP\_RATIO 2.79310344827586  
CUGGCGUUUUACCAUGAUUAAAAGAUGCAGGGUACCCCAAACCAUUUUCAAAGGAUUUGGAG  
GACUAAACUGGACAAUAGUGGCAGCGUUU  
>random\_seq\_from\_cds\_\_NO\_3436 RANDOM\_LENGTH 68 SEQ\_LENGTH 49  
GC\_CONTENT 0.510204081632653 BASEPAIR 19 FREE\_ENERGY  
-21.30 LEN\_BP\_RATIO 2.57894736842105  
CCGUAGAUGCUCAGGGACUUGAGGAGGGUAGAUCAUCUCUGCCUGAGUAUCUUUGACUGUGGGAG  
GAU  
>random\_seq\_from\_cds\_\_NO\_3441 RANDOM\_LENGTH 82 SEQ\_LENGTH 62  
GC\_CONTENT 0.403225806451613 BASEPAIR 27 FREE\_ENERGY  
-19.10 LEN\_BP\_RATIO 2.2962962962963  
UUUGUAGCCAUGUCAGCAUUGUAAGUUGGUGGACUGUCAAAUCAAUGUGAUCUGGCAUGUCAAC  
ACAUAACUCAUAAUUGC  
>random\_seq\_from\_cds\_\_NO\_3445 RANDOM\_LENGTH 84 SEQ\_LENGTH 60  
GC\_CONTENT 0.5 BASEPAIR 24 FREE\_ENERGY -20.00 LEN\_BP\_RATIO  
2.5  
AGCAGCAGGGCGGGCGAGCAUUCUAUGUUCUUAAGGGUUCUUGAUAAAGACAGAGUGCCUUUGU  
CUUGGAAUACAUCUUGGAU  
>random\_seq\_from\_cds\_\_NO\_3452 RANDOM\_LENGTH 90 SEQ\_LENGTH 78  
GC\_CONTENT 0.371794871794872 BASEPAIR 24 FREE\_ENERGY  
-20.47 LEN\_BP\_RATIO 3.25  
CCCUUCAUAAUUCACUUCUUAUUCUUAUGUAAUUCUGUUCUUGUAAUCCACAUAAACAGUACAUG  
GUUCCCAAGCAAACAGGUGGGGAUG  
>random\_seq\_from\_cds\_\_NO\_3461 RANDOM\_LENGTH 97 SEQ\_LENGTH 73

---

```
GC_CONTENT    0.479452054794521    BASEPAIR    25    FREE_ENERGY
-19.81    LEN_BP_RATIO    2.92
GCACUUUAAUUCUGGUACAUUUUGGUGUGAGAGACCAUCCGUAUGUGAGACAUUCUACCUCUCU
GUCUUCUUUCCUCCAGCUGUGUAGUAGCCAGU
>random_seq_from_cds__NO_3466    RANDOM_LENGTH    85    SEQ_LENGTH    67
GC_CONTENT    0.328358208955224    BASEPAIR    24    FREE_ENERGY
-15.50    LEN_BP_RATIO    2.791666666666667
UUUUGUCUAUGCUCAUUGGAAAAGUAAAAGCUUUUAAAAGUAUAGUAAUAUUGGGCAAUUCUCCA
UUUUCACAUGAGGAAAACC
>random_seq_from_cds__NO_3468    RANDOM_LENGTH    77    SEQ_LENGTH    69
GC_CONTENT    0.666666666666667    BASEPAIR    27    FREE_ENERGY
-38.20    LEN_BP_RATIO    2.55555555555556
GCCUUGGAGGAAUAAGGGUCUCCUGGGAGCCUGGUGUUGGUCGAGGCUGCCCAGGGAGGACCCG
AGGUUCAGGCAU
>random_seq_from_cds__NO_3489    RANDOM_LENGTH    81    SEQ_LENGTH    67
GC_CONTENT    0.567164179104478    BASEPAIR    23    FREE_ENERGY
-18.40    LEN_BP_RATIO    2.91304347826087
UCCCAAACAUCUGCAUGCCGAUGACAGCGUAGAUGAAGAAGAGCAUGACGAUGAGCAGAGCCAC
GUAGGGUAGGGCCCUG
>random_seq_from_cds__NO_3498    RANDOM_LENGTH    95    SEQ_LENGTH    77
GC_CONTENT    0.584415584415584    BASEPAIR    25    FREE_ENERGY
-29.70    LEN_BP_RATIO    3.08
CAUUGGAGUCUAUGGCCUUGUACAGCAGCCUGAGGCCAUCCCUCGAAGGUGGAGACCGUGAAGAG
GGACAUCAUGGCUGAGAGCACAUUGUCGAA
>random_seq_from_cds__NO_3511    RANDOM_LENGTH    73    SEQ_LENGTH    64
GC_CONTENT    0.609375    BASEPAIR    23    FREE_ENERGY    -26.60
LEN_BP_RATIO    2.78260869565217
GGCAGAAGUCAGGCUCUCCGCCUCGGCCAGGUUGUCCACGGCAAUGGCCAGGAAGACAUUGAGCA
GGAUGUCA
>random_seq_from_cds__NO_3514    RANDOM_LENGTH    84    SEQ_LENGTH    69
GC_CONTENT    0.536231884057971    BASEPAIR    23    FREE_ENERGY
-16.70    LEN_BP_RATIO    3
UGAGGGCUUGGGGAAAGUUGUCAAAAGUUGCUGCGCCGUACUUCUGUGUCUCAAAGUCAUACCUC
CCCCAAAGAGCUGCAUGC
>random_seq_from_cds__NO_3534    RANDOM_LENGTH    88    SEQ_LENGTH    67
GC_CONTENT    0.582089552238806    BASEPAIR    27    FREE_ENERGY
-34.30    LEN_BP_RATIO    2.48148148148148
UCAGGCAGAACAAGGCCCGGGUGGCCUUGGCAGAAUCUCAGGAACUGGCUUCUUGGGCUGUUUC
UUCCUCAGGCCUUCAUCCUGGGG
>random_seq_from_cds__NO_3540    RANDOM_LENGTH    90    SEQ_LENGTH    74
GC_CONTENT    0.567567567567568    BASEPAIR    26    FREE_ENERGY
-23.30    LEN_BP_RATIO    2.84615384615385
GCCAUAGCCUUGGGCCCAUACUUCUUGCCGUAAGCAGGACUUGCAGUAAAUCUCCUCACCAUGCA
CGGCCACAGUGGUACUGUCCAGAUU
```

---

```
>random_seq_from_cds__NO_3544 RANDOM_LENGTH 69 SEQ_LENGTH 55
GC_CONTENT 0.763636363636364 BASEPAIR 21 FREE_ENERGY
-29.50 LEN_BP_RATIO 2.61904761904762
CCAAGGCGCCCGGCGGGCGGGCGGCAUGGCCAAGGCCAGCGGGCUGAGCUGAAGGUCUUCAAG
UCCG
>random_seq_from_cds__NO_3546 RANDOM_LENGTH 110 SEQ_LENGTH 86
GC_CONTENT 0.604651162790698 BASEPAIR 31 FREE_ENERGY
-40.70 LEN_BP_RATIO 2.7741935483871
AAAAAGCUGCAGCUUUAUGAGCCCGAAUGGAGCGACGAUAUGGCCAAGGCGCCCAAAGGCUUAGG
CAAGGUGGGGUCCAAGGGCCGUGAAGCUCCGUGAUGUCCAAGAC
>random_seq_from_cds__NO_3549 RANDOM_LENGTH 84 SEQ_LENGTH 72
GC_CONTENT 0.666666666666667 BASEPAIR 25 FREE_ENERGY
-31.70 LEN_BP_RATIO 2.88
CUCUCCAGCAAGGCCAAGGGCGAAAAGAGCUCUGGGCCUGUCCCCUCUGCCAAGGGCCAGGAGGA
GCGCGCCUCCUCAAGGUG
>random_seq_from_cds__NO_3551 RANDOM_LENGTH 78 SEQ_LENGTH 65
GC_CONTENT 0.615384615384615 BASEPAIR 23 FREE_ENERGY
-27.10 LEN_BP_RATIO 2.82608695652174
AAAGAGGACAGUGCAGAAUGUCCUGGAUCUCCGGCAGAACCUUGGAAGAGACCAUGUCCAGCCUGC
GAGGGUCCAGGU
>random_seq_from_cds__NO_3552 RANDOM_LENGTH 92 SEQ_LENGTH 71
GC_CONTENT 0.619718309859155 BASEPAIR 23 FREE_ENERGY
-19.20 LEN_BP_RATIO 3.08695652173913
GACUCACAGGCUCCUGGAGAUGACCUGCUACGACAGCGAUGAUGCCAACCCACGCAGCGUGUCC
AGCCUCUCCAACCGCUCGUCCCCUCUG
>random_seq_from_cds__NO_3571 RANDOM_LENGTH 93 SEQ_LENGTH 77
GC_CONTENT 0.584415584415584 BASEPAIR 23 FREE_ENERGY
-20.70 LEN_BP_RATIO 3.34782608695652
CAUCCAGUGAUACCACCAUGCUUCAAGGUCCAGAUUCUGCAUGCUACAAGCUCAGCAUCUGGG
GGCCUCUCCCUCCUGCUUACCCCA
>random_seq_from_cds__NO_3572 RANDOM_LENGTH 89 SEQ_LENGTH 68
GC_CONTENT 0.529411764705882 BASEPAIR 20 FREE_ENERGY
-20.20 LEN_BP_RATIO 3.4
GUCCGGCACCCAUCCUCAAUAUUAACUCAGCCAGCUUCUCCAGGGCCUGGAGCUAAUGAGUGGU
UUCAGUGUGCCAAAAGAGACCCGC
>random_seq_from_cds__NO_3574 RANDOM_LENGTH 86 SEQ_LENGTH 64
GC_CONTENT 0.640625 BASEPAIR 19 FREE_ENERGY -19.20
LEN_BP_RATIO 3.36842105263158
AGCAGUACUCCCGUCCCCACCCACCCUGCUCCCCUGCUGCUCCACAGAAGAAGAGACGGAAGA
GCUGACUUGGAGUGGAAGCCC
>random_seq_from_cds__NO_3575 RANDOM_LENGTH 82 SEQ_LENGTH 69
GC_CONTENT 0.579710144927536 BASEPAIR 19 FREE_ENERGY
-21.70 LEN_BP_RATIO 3.63157894736842
CAGAGCUGGGCAACUGGACAGGUAAUCAGCGGAUCGGAACACUCUCCCAAGAAAGGGCUCAGG
```

```
GUACCAGCUUCAGUCCC
>random_seq_from_cds__NO_3584 RANDOM_LENGTH 78 SEQ_LENGTH 63
  GC_CONTENT 0.507936507936508 BASEPAIR 21 FREE_ENERGY
  -16.50 LEN_BP_RATIO 3
AUCUCAAGCCUCAACAGCAUCACUAGCCAUUCCAGCAUCGGCAGCAGCAAGGAUGCUGAUGCAGAA
AAAGAAGAAAAAA
>random_seq_from_cds__NO_3594 RANDOM_LENGTH 83 SEQ_LENGTH 68
  GC_CONTENT 0.470588235294118 BASEPAIR 20 FREE_ENERGY
  -16.80 LEN_BP_RATIO 3.4
UUCCAAGUGUUCAAGGGACUAUAUUUCUAAAAUGGACCCAGCCUCUACCCUGGGACUAAGCACUG
AGUCCAUCAUGGCUACA
>random_seq_from_cds__NO_3614 RANDOM_LENGTH 82 SEQ_LENGTH 77
  GC_CONTENT 0.597402597402597 BASEPAIR 26 FREE_ENERGY
  -27.30 LEN_BP_RATIO 2.96153846153846
CAGCAGCUUGGCGAUCUCCAUCUCCGUCUUGCCUCCACAGAUGUGUCGCGUGGUUGUGGAAGCGGA
GCUCGGUCAGCGUGUUG
>random_seq_from_cds__NO_3617 RANDOM_LENGTH 110 SEQ_LENGTH 99
  GC_CONTENT 0.505050505050505 BASEPAIR 33 FREE_ENERGY
  -24.10 LEN_BP_RATIO 3
AACUCCAGAGCCUCAGUAAACCGGACCAAGAUCUCAUUUGUGAUGCAGUCUGAGUUGUUGACGUU
CACCUCAGUCAUCUCGGGGUCAUUGUUCUUCACUCUCUCCAGAGG
>random_seq_from_cds__NO_3618 RANDOM_LENGTH 87 SEQ_LENGTH 59
  GC_CONTENT 0.677966101694915 BASEPAIR 22 FREE_ENERGY
  -26.90 LEN_BP_RATIO 2.68181818181818
CUCAUCAAAUAUGCUGGGAGCUGCCUCCUCCUCCACCUUGGCCGGUCCUUCAGAGGGCUUGGUGG
GGCCACUGGGCGUCUGUUUCUC
>random_seq_from_cds__NO_3627 RANDOM_LENGTH 75 SEQ_LENGTH 52
  GC_CONTENT 0.596153846153846 BASEPAIR 20 FREE_ENERGY
  -15.80 LEN_BP_RATIO 2.6
CACAGAAGUUGAGCAUGGCCUCCCGGUUGUACACACCCGUGGACUGUUUCUCCGUCUGGUUUCUC
UGCCGCAGCC
>random_seq_from_cds__NO_3638 RANDOM_LENGTH 68 SEQ_LENGTH 58
  GC_CONTENT 0.655172413793103 BASEPAIR 24 FREE_ENERGY
  -26.90 LEN_BP_RATIO 2.41666666666667
CGGGAUGCCACCUUCUGCUUCAUCGUGUCGUGGCGGUGGCUGAUGUGGCCGUGGGUGCCCUGGU
CAU
>random_seq_from_cds__NO_3641 RANDOM_LENGTH 77 SEQ_LENGTH 52
  GC_CONTENT 0.769230769230769 BASEPAIR 20 FREE_ENERGY
  -31.40 LEN_BP_RATIO 2.6
GUGACCCCGGAGGGCGGCGGUGGCAUAGCCGGCUGCUGGAUCCUCUCCUUCGUGGUGGGACU
GACCCUAUGUU
>random_seq_from_cds__NO_3649 RANDOM_LENGTH 68 SEQ_LENGTH 56
  GC_CONTENT 0.607142857142857 BASEPAIR 20 FREE_ENERGY
  -24.61 LEN_BP_RATIO 2.8
```

GUCGGGCAGCUUUGCUGGAACAGCCGCCCGCUGCACAGCUGUAGAAGCUGGACCGUUCCCGAGG  
AUU

>random\_seq\_from\_cds\_\_NO\_3652 RANDOM\_LENGTH 97 SEQ\_LENGTH 81  
GC\_CONTENT 0.654320987654321 BASEPAIR 26 FREE\_ENERGY  
-30.60 LEN\_BP\_RATIO 3.11538461538462

UGGAUGAGGGGGUAUCGGCCUGGUUGCAGGAGAAGCCGGCAAAGUCAUCUAAGUCCAGUGCCCA  
GACCAUGGCCCGCCAGUCCCUUCUGCUUCA

>random\_seq\_from\_cds\_\_NO\_3654 RANDOM\_LENGTH 72 SEQ\_LENGTH 57  
GC\_CONTENT 0.56140350877193 BASEPAIR 20 FREE\_ENERGY  
-17.90 LEN\_BP\_RATIO 2.85

UGAUCCUGGAUUCUCUGUUUGGUGGCCCCCUUCCAGGAGCAGACCUUCAUAGUAGGCCAGCAUCC  
CUCCUUC

>random\_seq\_from\_cds\_\_NO\_3658 RANDOM\_LENGTH 71 SEQ\_LENGTH 43  
GC\_CONTENT 0.558139534883721 BASEPAIR 19 FREE\_ENERGY  
-20.15 LEN\_BP\_RATIO 2.26315789473684

AAUCCAGGUUCCUGGGCGAUUUUGUCCACCUCGUAUCCAGCAUCCACAUAGGUCUGCCAGCUGG  
AACCGC

>random\_seq\_from\_cds\_\_NO\_3661 RANDOM\_LENGTH 82 SEQ\_LENGTH 75  
GC\_CONTENT 0.5333333333333333 BASEPAIR 26 FREE\_ENERGY  
-20.00 LEN\_BP\_RATIO 2.88461538461538

GGCCGAGUUGACAAAGGUCUGACGGUUGUUGGCCGUGGCUACCAUAUCUGUGAACCUUCUGAGUG  
CCGAAAUUCCAGCCUCC

>random\_seq\_from\_cds\_\_NO\_3670 RANDOM\_LENGTH 68 SEQ\_LENGTH 54  
GC\_CONTENT 0.5555555555555556 BASEPAIR 21 FREE\_ENERGY  
-23.10 LEN\_BP\_RATIO 2.57142857142857

UCAGGUCCAGCAAGAUCAGUGACCGGAGGCCCUCAUGGAACUGCCCACUUCUGGAUCUCAUUG  
UGU

>random\_seq\_from\_cds\_\_NO\_3687 RANDOM\_LENGTH 85 SEQ\_LENGTH 77  
GC\_CONTENT 0.532467532467532 BASEPAIR 27 FREE\_ENERGY  
-24.50 LEN\_BP\_RATIO 2.85185185185185

UGUCCUGGCUGAGAAAGCCACUGACUGUCCUGUUGAAUAGCGGAGGGUGAGUUCUGUUCUUAUG  
UGCUGUAGCUGGAGGAAUC

>random\_seq\_from\_cds\_\_NO\_3699 RANDOM\_LENGTH 110 SEQ\_LENGTH 99  
GC\_CONTENT 0.484848484848485 BASEPAIR 36 FREE\_ENERGY  
-25.00 LEN\_BP\_RATIO 2.75

CCAACCAUCUCAUUGUAGGUAGGAUUGCAGGUUUUCCGGGCCACUUUGGUUUUCCUCUJAGUGGU  
UUUCUGAGGGUCAGGAAGGAGGUAAAUUUUCACAUAGGGGUCAGG

>random\_seq\_from\_cds\_\_NO\_3704 RANDOM\_LENGTH 89 SEQ\_LENGTH 76  
GC\_CONTENT 0.513157894736842 BASEPAIR 26 FREE\_ENERGY  
-26.30 LEN\_BP\_RATIO 2.92307692307692

UGGAACUCCUCAAGGUCCGUGGAUGUAGGUGGCCUCGUGAGUGUUCUCUCGCAUCACCUUUAC  
CACAUUAUCAUAGCCUUUGUUGG

>random\_seq\_from\_cds\_\_NO\_3708 RANDOM\_LENGTH 100 SEQ\_LENGTH 88  
GC\_CONTENT 0.556818181818182 BASEPAIR 30 FREE\_ENERGY

```
-29.80 LEN_BP_RATIO 2.9333333333333333
GGCAUCGUACACAUACUUGAGGUCCUCCAGGUCUGAGAGUUCAGGGAUCCCACAGGACAACAUC
AGGCCAGAAGGUUGAGGAAGAGGUGGGUGUGCUU
>random_seq_from_cds__NO_3720 RANDOM_LENGTH 71 SEQ_LENGTH 62
GC_CONTENT 0.596774193548387 BASEPAIR 22 FREE_ENERGY
-24.61 LEN_BP_RATIO 2.81818181818182
GCCACAGCAGCACAGUAAGGCUGCCAGCAGAUACUGGUAGCGGAUGCUGAACUGAGAGUCCUUGA
GGCCGU
>random_seq_from_cds__NO_3726 RANDOM_LENGTH 90 SEQ_LENGTH 80
GC_CONTENT 0.5875 BASEPAIR 27 FREE_ENERGY -29.30
LEN_BP_RATIO 2.96296296296296
UGUCUUUAAGCUUGCGCUGGUCUUCUCCCGGAGGCUGCCAAACUCAUAGCGGGGCUGAACUUG
UCUCCAGGGGGCUGGUGAACUUGA
>random_seq_from_cds__NO_3736 RANDOM_LENGTH 69 SEQ_LENGTH 57
GC_CONTENT 0.684210526315789 BASEPAIR 20 FREE_ENERGY
-20.30 LEN_BP_RATIO 2.85
CACGGCGCCAGGGCGUUGCAGAUGGCCUUGACGGACUGGACCACCCUGUCAGCCUUCAGUGGGA
AGUC
>random_seq_from_cds__NO_3739 RANDOM_LENGTH 81 SEQ_LENGTH 66
GC_CONTENT 0.515151515151515 BASEPAIR 24 FREE_ENERGY
-22.00 LEN_BP_RATIO 2.75
GUAGCCGAAUGUCA AUGUCAAAACUUGCGGCAGUAUUGGAUGUACUCAUGACUGCCCAAGGCAUGC
UUGCUCUGCAGGAAC
>random_seq_from_cds__NO_3745 RANDOM_LENGTH 70 SEQ_LENGTH 58
GC_CONTENT 0.655172413793103 BASEPAIR 20 FREE_ENERGY
-22.00 LEN_BP_RATIO 2.9
CUCCUGGCCACGGGUUUUCCAGAGGUGUCUUUGCUGAAGUCCAGCGGCCUCGGCCCUCCUCCA
GCCCC
>random_seq_from_cds__NO_3763 RANDOM_LENGTH 78 SEQ_LENGTH 61
GC_CONTENT 0.39344262295082 BASEPAIR 24 FREE_ENERGY
-18.90 LEN_BP_RATIO 2.54166666666667
UUUGAAUGAGUCAGUAUCAGAGCAGUUAGGUGUUGGAAUAAAAGUUGAAGCUGCUGAUACUGAAC
AAACAAGUGAAGA
>random_seq_from_cds__NO_3771 RANDOM_LENGTH 80 SEQ_LENGTH 69
GC_CONTENT 0.565217391304348 BASEPAIR 21 FREE_ENERGY
-23.74 LEN_BP_RATIO 3.28571428571429
GCCCUUGUCUCCUCUUCAGGCUUGGAGUUCAGCCCUGGGAUCCCAAACCACCUUCGGGCCUGUCU
UGAAGACCAGCCCC
>random_seq_from_cds__NO_3774 RANDOM_LENGTH 81 SEQ_LENGTH 67
GC_CONTENT 0.641791044776119 BASEPAIR 24 FREE_ENERGY
-28.80 LEN_BP_RATIO 2.79166666666667
UGGGGGGCAACCUGGUCAUCAUGAACCCACCAAGGCACAGGAUGCCGGGGUCUACCAGUGCCUG
GCCUCAACCCAGUGG
>random_seq_from_cds__NO_3791 RANDOM_LENGTH 110 SEQ_LENGTH 95
```



---

```
GC_CONTENT    0.621052631578947    BASEPAIR    34    FREE_ENERGY
-42.70    LEN_BP_RATIO    2.79411764705882
CAGGUCCCCAGGAGGUGUGGUGGUGAGGGACAUUGGCGACACCACCAUCCAGCUCAGCUGGAGC
CGUGGCUUCGACAACCACAGCCCCAUCGCUAAGUACACCCUGCAA
>random_seq_from_cds__NO_3800    RANDOM_LENGTH    84    SEQ_LENGTH    77
GC_CONTENT    0.701298701298701    BASEPAIR    24    FREE_ENERGY
-32.76    LEN_BP_RATIO    3.208333333333333
GUGACCGUGAGGGCCUACAACCGGGCUGGCACUGGGCCUGCCAGCCCUUCUGCCAACGCCACGAC
CAUGAAGCCCCGCUCCGCG
>random_seq_from_cds__NO_3804    RANDOM_LENGTH    72    SEQ_LENGTH    62
GC_CONTENT    0.629032258064516    BASEPAIR    20    FREE_ENERGY
-18.00    LEN_BP_RATIO    3.1
AUCGUGAGGAAUGGAGGGCACAAGCAUGAUGGUGGAGAAACAUGGCAGUCCGCCAGCACACCACCC
CUGGCAC
>random_seq_from_cds__NO_3810    RANDOM_LENGTH    82    SEQ_LENGTH    76
GC_CONTENT    0.565789473684211    BASEPAIR    24    FREE_ENERGY
-26.50    LEN_BP_RATIO    3.166666666666667
UCAUCCAUCAAGGAGGUUUGGACUGCAUCCGGUGGGGGCCGUAAGGAUUUUUCUUCUGGGUCUUC
UACCUCAGGGGCAAUGG
>random_seq_from_cds__NO_3821    RANDOM_LENGTH    84    SEQ_LENGTH    70
GC_CONTENT    0.471428571428571    BASEPAIR    24    FREE_ENERGY
-18.40    LEN_BP_RATIO    2.916666666666667
AUCUCGUGGAUGAUUUGGACUUUUAAGAUGGGUGAAGGGAAUCGAAACCUCUGGUCACAGUCGC
CUGAAAGAACAUCCACUG
>random_seq_from_cds__NO_3831    RANDOM_LENGTH    100    SEQ_LENGTH    84
GC_CONTENT    0.511904761904762    BASEPAIR    25    FREE_ENERGY
-27.10    LEN_BP_RATIO    3.36
CUAUAUUAUGUACCUCGAGACCAUCUAGCUUAUCGAUAUGAGGUGCUGAAAAUUAUUGGCAAGG
GGAGUUUUGGGCAGGUGGCCAGGGUCUAUGAUCAC
>random_seq_from_cds__NO_3837    RANDOM_LENGTH    84    SEQ_LENGTH    66
GC_CONTENT    0.454545454545455    BASEPAIR    19    FREE_ENERGY
-17.70    LEN_BP_RATIO    3.47368421052632
CCAGUCUCGGUUCUACAGAGCUCAGAAUUAUCUUAGGAAGCCGCUACAGCACACCAAUUGACA
UAUGGAGUUUUGGCUGCAU
>random_seq_from_cds__NO_3865    RANDOM_LENGTH    81    SEQ_LENGTH    75
GC_CONTENT    0.586666666666667    BASEPAIR    22    FREE_ENERGY
-26.70    LEN_BP_RATIO    3.40909090909091
GGGGUGCAAGCCAUCUGCCUGGAGUUGCCACAGAGCCUUGUUGAAGGUGGGUGUCAGGUCAGGCA
ACGAAGACAUCUCCAG
>random_seq_from_cds__NO_3870    RANDOM_LENGTH    86    SEQ_LENGTH    70
GC_CONTENT    0.671428571428571    BASEPAIR    26    FREE_ENERGY
-30.40    LEN_BP_RATIO    2.69230769230769
CCCUGGAGAGUUCGCCUGAGGGAGAGGAUGGCACUGGCCACCUGAGCCACCUCUGCUCUGUGA
CUGCGGGCUGCUGAGAACUG
```

---

```
>random_seq_from_cds__NO_3880 RANDOM_LENGTH 68 SEQ_LENGTH 55
  GC_CONTENT 0.581818181818182 BASEPAIR 20 FREE_ENERGY
  -21.10 LEN_BP_RATIO 2.75
CAGAUGCAGGUCUCCUGAAUGGAAGCUCCCGGGCGCCGGUCCGGAAAUAGUGCAGCUGACACCG
CUC
>random_seq_from_cds__NO_3888 RANDOM_LENGTH 70 SEQ_LENGTH 65
  GC_CONTENT 0.661538461538462 BASEPAIR 24 FREE_ENERGY
  -27.30 LEN_BP_RATIO 2.708333333333333
ACUGGCACCGAACAUCCUGCCAGCUCUGAGGCCGACCCUGGCGGACCCGAGGGAAGGUGGAGGUG
CAGUC
>random_seq_from_cds__NO_3890 RANDOM_LENGTH 85 SEQ_LENGTH 69
  GC_CONTENT 0.623188405797101 BASEPAIR 25 FREE_ENERGY
  -25.30 LEN_BP_RATIO 2.76
UGGAAUCUCCUGUCCAGGUCCAGCUGCAGAGAGACAGGGUUCACAUCCAUCUUGUGACUGCCACC
AGCGCAUGGGGCCGAGGAU
>random_seq_from_cds__NO_3903 RANDOM_LENGTH 110 SEQ_LENGTH 94
  GC_CONTENT 0.595744680851064 BASEPAIR 31 FREE_ENERGY
  -41.20 LEN_BP_RATIO 3.03225806451613
ACUCCAUCUCCAGGGUUCAGUUUUGGGCCACACUGCCUCCGGGUGCAGUUGCCCACACUGCA
AUUGCCCACACUGGCUGGCGCCAUGGGAGAACCCAUGAUGUUCA
>random_seq_from_cds__NO_3904 RANDOM_LENGTH 84 SEQ_LENGTH 70
  GC_CONTENT 0.542857142857143 BASEPAIR 28 FREE_ENERGY
  -29.60 LEN_BP_RATIO 2.5
GGAAGGGGAAGGUGUCCUGGAUGGGAACAUGGUGCUGCGACUGAUCCAGCUCAUCUCCUCAUCU
UCUUCAUCCACAUAUUAU
>random_seq_from_cds__NO_3908 RANDOM_LENGTH 72 SEQ_LENGTH 55
  GC_CONTENT 0.581818181818182 BASEPAIR 22 FREE_ENERGY
  -30.00 LEN_BP_RATIO 2.5
GUUGAGGGCUAUGCCGGGUGGCAUGUUUCCAGGGAAUCUGGAAGCGUUUAGAGUCCUGUGUAGC
CAGAUGA
>random_seq_from_cds__NO_3918 RANDOM_LENGTH 99 SEQ_LENGTH 84
  GC_CONTENT 0.416666666666667 BASEPAIR 26 FREE_ENERGY
  -20.42 LEN_BP_RATIO 3.23076923076923
GACUCCAAGUCGAUCAACUUUGCAAUAGGGAAAAGAGAUGCUAUAGCAGUUUCUUUGACAAU
CUAGCAGUCCUCAUCUUUUGGAUCAAUUAAAAGC
>random_seq_from_cds__NO_3933 RANDOM_LENGTH 82 SEQ_LENGTH 58
  GC_CONTENT 0.396551724137931 BASEPAIR 23 FREE_ENERGY
  -19.87 LEN_BP_RATIO 2.52173913043478
ACAGCAGAAAGCUGAGUUCUCAGAUCAGAAACAUCAGAAGGAAAUAGAAAUAUGUGUUUGAAGA
CUUCUCAGCUUACUGGG
>random_seq_from_cds__NO_3939 RANDOM_LENGTH 81 SEQ_LENGTH 70
  GC_CONTENT 0.428571428571429 BASEPAIR 28 FREE_ENERGY
  -17.60 LEN_BP_RATIO 2.5
AAGUCAGCGCAUUAAGUUAACAGGAAGACACUUCUGCUCACCAGAAUGUUGUUGCUGAAACCU
```

UAAGUGCCCUUGAGAA

>random\_seq\_from\_cds\_\_NO\_3956 RANDOM\_LENGTH 62 SEQ\_LENGTH 54  
GC\_CONTENT 0.4444444444444444 BASEPAIR 20 FREE\_ENERGY  
-21.90 LEN\_BP\_RATIO 2.7

GAAGACAUACCAGGAGGUGAAUUUGGUGAACAACCAAUGAACAGCACCCUGUGUCUUUGGC

>random\_seq\_from\_cds\_\_NO\_3959 RANDOM\_LENGTH 67 SEQ\_LENGTH 55  
GC\_CONTENT 0.4545454545454545 BASEPAIR 21 FREE\_ENERGY  
-18.00 LEN\_BP\_RATIO 2.61904761904762

CUGCAGACCUAUGUUGACUCAUUAAGGCCGAAAAUUUGGUCUUGUCAACGAAUCUGAGAAACUU  
UC

>random\_seq\_from\_cds\_\_NO\_3978 RANDOM\_LENGTH 85 SEQ\_LENGTH 60  
GC\_CONTENT 0.5166666666666667 BASEPAIR 20 FREE\_ENERGY  
-16.40 LEN\_BP\_RATIO 3

GGAGAAAACACAAGAGCUUGAGUCUCAUCAAAGUGAGUGUCUCCAUGCAUUCAGGUGGCAGAGG  
CAGAGGUGAAGGAAAAGACG

>random\_seq\_from\_cds\_\_NO\_3979 RANDOM\_LENGTH 94 SEQ\_LENGTH 88  
GC\_CONTENT 0.4545454545454545 BASEPAIR 32 FREE\_ENERGY  
-25.71 LEN\_BP\_RATIO 2.75

GAACUCCUUCAGACUUUGUCCUCUGAUGUGAGUGAGCUGUJAAAAGACAAAACUCAUCUCCAGGA  
AAAGCUGCAGAGUUUGGAAAAGGACUCAC

>random\_seq\_from\_cds\_\_NO\_3996 RANDOM\_LENGTH 78 SEQ\_LENGTH 69  
GC\_CONTENT 0.420289855072464 BASEPAIR 24 FREE\_ENERGY  
-18.70 LEN\_BP\_RATIO 2.875

UAUUGUUUUGCAAUCUUCAGUGAAUGGCCUCAUUAAGAAGUAGAAGAUGGCAAGCAGAAACUGG  
AGAAGAAGGAUGA

>random\_seq\_from\_cds\_\_NO\_4018 RANDOM\_LENGTH 84 SEQ\_LENGTH 55  
GC\_CONTENT 0.5454545454545454 BASEPAIR 19 FREE\_ENERGY  
-18.91 LEN\_BP\_RATIO 2.89473684210526

CCCACAGUGCUUGCUUCCCGGGUGGAGAGUGACACGACCAUJAAUGUUAUGAAAUGGAAGACGGU  
CUCCACGAUUAUCCUGGUG

>random\_seq\_from\_cds\_\_NO\_4032 RANDOM\_LENGTH 83 SEQ\_LENGTH 70  
GC\_CONTENT 0.457142857142857 BASEPAIR 24 FREE\_ENERGY  
-23.50 LEN\_BP\_RATIO 2.916666666666667

AAUAAUCAAUUGCCUUGGUCGCUAUUAUUGGUAUUCUCUGGGGUAGUCAUCCUGGUACUCGCAUGA  
UACUCAUCAGGGUAUUCU

>random\_seq\_from\_cds\_\_NO\_4035 RANDOM\_LENGTH 110 SEQ\_LENGTH 82  
GC\_CONTENT 0.524390243902439 BASEPAIR 30 FREE\_ENERGY  
-27.80 LEN\_BP\_RATIO 2.733333333333333

AAAUUGUCGAGUUGUCCACCGGUCUGUAAUGUUAGCUUCUGAUCAUAGAUGUCUCUUCUGGUACCU  
GGUGCUAACAUCCUGCCUGGCGUGGCUCCUUUAUUAGUGCCCAU

>random\_seq\_from\_cds\_\_NO\_4058 RANDOM\_LENGTH 82 SEQ\_LENGTH 73  
GC\_CONTENT 0.438356164383562 BASEPAIR 26 FREE\_ENERGY  
-22.30 LEN\_BP\_RATIO 2.80769230769231

AUAUGCAGGAUACAUAUACCUGUUUCACUAGUAGGACGAAUGGCAAUUGGUUCUGCCAGCUCGGUU

```
UUGCCAGAUCUUGUAAC
>random_seq_from_cds__NO_4059 RANDOM_LENGTH 82 SEQ_LENGTH 67
  GC_CONTENT 0.492537313432836 BASEPAIR 21 FREE_ENERGY
  -16.50 LEN_BP_RATIO 3.19047619047619
CCAAGCAACCCUCUGGGGCAAAGUCAGCAACAUGAGUCUUCUCUUUCUCUAAUGCACUUUGAGAC
ACAAACAUGGGGAAGUA
>random_seq_from_cds__NO_4071 RANDOM_LENGTH 90 SEQ_LENGTH 82
  GC_CONTENT 0.402439024390244 BASEPAIR 26 FREE_ENERGY
  -19.96 LEN_BP_RATIO 3.15384615384615
AGCCACUCUAUUGUAAAGGACCAAGGAAUCCUCAGAUGUAGUACAAUUAUUUAUUCAGAGAAGGUG
UUGGUCUUUCCUAAAAGGAGCAGA
>random_seq_from_cds__NO_4084 RANDOM_LENGTH 84 SEQ_LENGTH 71
  GC_CONTENT 0.464788732394366 BASEPAIR 22 FREE_ENERGY
  -17.23 LEN_BP_RATIO 3.22727272727273
AAACUGCUCAUUCUCUGUCAUGGUAUUCUGUUGUUCUCAGGGCAUGUGUAACACCUUCGAUGCUGU
CAACUAUGGGGCAGGCAAA
>random_seq_from_cds__NO_4085 RANDOM_LENGTH 95 SEQ_LENGTH 76
  GC_CONTENT 0.407894736842105 BASEPAIR 24 FREE_ENERGY
  -19.60 LEN_BP_RATIO 3.16666666666667
AUCAUAUGUUGGAUAAACACUUGUAUUUUAUUUCCAGUUCUUGGAUGUGGUUGAAUUUUGCAGCGA
UAAAGGGUUGGAUCUCUCAUGCAUCCAUG
>random_seq_from_cds__NO_4102 RANDOM_LENGTH 89 SEQ_LENGTH 75
  GC_CONTENT 0.56 BASEPAIR 29 FREE_ENERGY -28.80
  LEN_BP_RATIO 2.58620689655172
CUGAUAGCCGACUGGCCGGUGGUGGUCUUGGGCAUGUGCACCAUGUUCAUCGUAGUCUGUGCCUU
GGUUGGAGUAUUAGUGCCAGAGCU
>random_seq_from_cds__NO_4111 RANDOM_LENGTH 81 SEQ_LENGTH 68
  GC_CONTENT 0.455882352941176 BASEPAIR 21 FREE_ENERGY
  -22.51 LEN_BP_RATIO 3.23809523809524
CACGCCAGCUUAAAUAACAGCAUGCUCUUCUCUCCCACAGAGAAAGGGGAGAGCAUGAUGAACA
UUUACUUGGACAACUU
>random_seq_from_cds__NO_4140 RANDOM_LENGTH 94 SEQ_LENGTH 85
  GC_CONTENT 0.541176470588235 BASEPAIR 27 FREE_ENERGY
  -18.30 LEN_BP_RATIO 3.14814814814815
CUUGAACUAUGGCCACACUCUUGCCAGCAGAUGGGGGACUGCUUGUGCCACCAGUGCUCUCCUA
CCACUAGCAGCUUUGUCCAGAUCAAAAC
>random_seq_from_cds__NO_4142 RANDOM_LENGTH 72 SEQ_LENGTH 66
  GC_CONTENT 0.5303030303030303 BASEPAIR 21 FREE_ENERGY
  -20.10 LEN_BP_RATIO 3.14285714285714
UGCAGGGCAGAGUAAAGCCAGCCGGAUUGCAGAAUUCUCUGCCUAGGAAUUUUUCCUCCACCCA
GUGCAGC
>random_seq_from_cds__NO_4155 RANDOM_LENGTH 77 SEQ_LENGTH 58
  GC_CONTENT 0.603448275862069 BASEPAIR 22 FREE_ENERGY
  -24.40 LEN_BP_RATIO 2.63636363636364
```

UAUGAAGCGCUAUCAGGGGUGCCACCACUGAGGGCUUCGAAGACUUCACCGGAGGCAUUGCUGA  
GUGGUAUGAGUU

>random\_seq\_from\_cds\_\_NO\_4167 RANDOM\_LENGTH 67 SEQ\_LENGTH 58  
GC\_CONTENT 0.517241379310345 BASEPAIR 22 FREE\_ENERGY  
-16.60 LEN\_BP\_RATIO 2.63636363636364

AGAUCUCUGCCUUUGAGCUGCAGACCAUCCUGAGAAGGGUUCUAGCAAAGCGGCCAAGAUUAUCAA  
GU

>random\_seq\_from\_cds\_\_NO\_4168 RANDOM\_LENGTH 86 SEQ\_LENGTH 79  
GC\_CONTENT 0.506329113924051 BASEPAIR 30 FREE\_ENERGY  
-25.80 LEN\_BP\_RATIO 2.633333333333333

CAGAUGGCUUCAGCAUCGAGACAUGCAAAAUUAUGGUUGACAUGCUAGAUGUCGGACGGGAGUGG  
CAAGCUGGGGCGUAAGGAGUU

>random\_seq\_from\_cds\_\_NO\_4172 RANDOM\_LENGTH 110 SEQ\_LENGTH 93  
GC\_CONTENT 0.56989247311828 BASEPAIR 33 FREE\_ENERGY  
-40.50 LEN\_BP\_RATIO 2.81818181818182

AUCCUCCUCACUUCAGUGCUGGGCUUUGCCAUCUACUGGUUCAUCUCCCGGGACAAAGAGGAAAC  
UUUGCCACUUGAAGAUGGGUGGGGGCCAGGCACGAGGUCCGC

>random\_seq\_from\_cds\_\_NO\_4187 RANDOM\_LENGTH 84 SEQ\_LENGTH 71  
GC\_CONTENT 0.633802816901408 BASEPAIR 27 FREE\_ENERGY  
-31.80 LEN\_BP\_RATIO 2.62962962962963

UGUCGGUGCUGGAGCGGCAAUGACCUAUGGCUGGAGCCUCCUUGGCACGAGCGCACCAUCCGAGG  
CACAGCUGCACUUCUGCAC

>random\_seq\_from\_cds\_\_NO\_4191 RANDOM\_LENGTH 80 SEQ\_LENGTH 68  
GC\_CONTENT 0.647058823529412 BASEPAIR 21 FREE\_ENERGY  
-27.70 LEN\_BP\_RATIO 3.23809523809524

GCAGCGGGUGCCCUCGGUCAUUGGUGCUUCAGGGUCACAGUCGCCUGAGCUCCAUAGUCCCCA  
AGGUCCAGGGUGUGC

>random\_seq\_from\_cds\_\_NO\_4207 RANDOM\_LENGTH 94 SEQ\_LENGTH 87  
GC\_CONTENT 0.793103448275862 BASEPAIR 33 FREE\_ENERGY  
-47.00 LEN\_BP\_RATIO 2.63636363636364

GGGAGGUGCUGGUUGGAGCCGUCGUCGCGGACGCGCAGCCACUCGACGGUCACCCGGGCCUGGGCG  
CUGCGCGGGGACAGCCGCCCGUGCCUGUG

>random\_seq\_from\_cds\_\_NO\_4209 RANDOM\_LENGTH 84 SEQ\_LENGTH 70  
GC\_CONTENT 0.671428571428571 BASEPAIR 26 FREE\_ENERGY  
-26.50 LEN\_BP\_RATIO 2.69230769230769

CAUGCCGAACACCAGCAGGUGUGUGCUGGCCUCCGACGCCAGGAACCUGCCGGCCACCUCCUGG  
AAGCUCUGGCUGAACCUCU

>random\_seq\_from\_cds\_\_NO\_4216 RANDOM\_LENGTH 86 SEQ\_LENGTH 76  
GC\_CONTENT 0.513157894736842 BASEPAIR 28 FREE\_ENERGY  
-24.60 LEN\_BP\_RATIO 2.71428571428571

UUUGCAGGGAGGCAAGUGAGGCCUAUCUGGUUGCCUUUUUGAAGACACCAACCUGUGUCUAUC  
CAUGCCAAACGUGUAACAAU

>random\_seq\_from\_cds\_\_NO\_4233 RANDOM\_LENGTH 89 SEQ\_LENGTH 74  
GC\_CONTENT 0.851351351351351 BASEPAIR 28 FREE\_ENERGY

---

-49.00 LEN\_BP\_RATIO 2.64285714285714  
CUCCGCCGCGCCCCAGCCGCCGCCUCCCCGGGCUCGGGCUCUCCCCUGAGGCGCCCGGGCCGC  
GACCGGAUCCAGGUGGCGAGGGCG  
>random\_seq\_from\_cds\_\_NO\_4243 RANDOM\_LENGTH 82 SEQ\_LENGTH 68  
GC\_CONTENT 0.544117647058823 BASEPAIR 25 FREE\_ENERGY  
-25.90 LEN\_BP\_RATIO 2.72  
CUCAUAGUUGACAUCGAUGGGAUCCUUGCUGCUAUCAUCAUCAGACCCUCCCCUGAGCAGACUGUAGG  
CCACCUCGAUGUCCAGC  
>random\_seq\_from\_cds\_\_NO\_4251 RANDOM\_LENGTH 110 SEQ\_LENGTH 90  
GC\_CONTENT 0.555555555555556 BASEPAIR 32 FREE\_ENERGY  
-32.70 LEN\_BP\_RATIO 2.8125  
UUGUAGUAGGAGUUGGUUCCUUAACGAUGUCCACCAGGCCAAGGGUGGCACUGAAGACCUUCCC  
ACCUUUCUCCAGGACAUGCGCAGAGUGUCCAGUCCCAGAAUCAG  
>random\_seq\_from\_cds\_\_NO\_4267 RANDOM\_LENGTH 110 SEQ\_LENGTH 75  
GC\_CONTENT 0.586666666666667 BASEPAIR 20 FREE\_ENERGY  
-18.24 LEN\_BP\_RATIO 3.75  
GCCUUGCACCAUCCAUCCUGGCCUUUGCCCUGUCACUCCUCCAGCUUCCGCUGUCUUCUUGA  
CUUUCUGCUGGUCAUCCACCGAAGCUCAGAGAACCCAUCCACCU  
>random\_seq\_from\_cds\_\_NO\_4274 RANDOM\_LENGTH 82 SEQ\_LENGTH 66  
GC\_CONTENT 0.545454545454545 BASEPAIR 22 FREE\_ENERGY  
-20.00 LEN\_BP\_RATIO 3  
CUUCAUUGGUGGUGCUGCCCACCUUGAGUGCCGUCUCAUACUUGUGCUUCAGAUGCUUGCCCACC  
UCAUGGAAAGGCGCCAA  
>random\_seq\_from\_cds\_\_NO\_4275 RANDOM\_LENGTH 73 SEQ\_LENGTH 52  
GC\_CONTENT 0.692307692307692 BASEPAIR 22 FREE\_ENERGY  
-29.70 LEN\_BP\_RATIO 2.36363636363636  
CUGCCGCCAGCAGGUCCGCACCCUGCAUGAGCCUGACACGCCGUGGCACUUGCAGGUGGUCUCCA  
CCCCAGCC  
>random\_seq\_from\_cds\_\_NO\_4284 RANDOM\_LENGTH 88 SEQ\_LENGTH 73  
GC\_CONTENT 0.698630136986301 BASEPAIR 28 FREE\_ENERGY  
-34.60 LEN\_BP\_RATIO 2.60714285714286  
ACCCGAUCUGGUGGGUCGUGGCUGUUGGGCCACAGUAUCCUCCCUGGGCUCGCAGCCCAUCCU  
GUGUGCCAGCAUCCCGGGCCUGG  
>random\_seq\_from\_cds\_\_NO\_4287 RANDOM\_LENGTH 85 SEQ\_LENGTH 68  
GC\_CONTENT 0.676470588235294 BASEPAIR 25 FREE\_ENERGY  
-35.00 LEN\_BP\_RATIO 2.72  
UUGCCUCAGCCGGUGUGGCCUUUGCAGUGACACGCUCAUGUGCAGAAGGCACGGCCGCAUCUGU  
GGCUGCAGCAGCCGCCACCA  
>random\_seq\_from\_cds\_\_NO\_4297 RANDOM\_LENGTH 75 SEQ\_LENGTH 48  
GC\_CONTENT 0.625 BASEPAIR 20 FREE\_ENERGY -29.05  
LEN\_BP\_RATIO 2.4  
GCCAGGACAAGAUCCGGCCCCUGUGGCGCCACUACUCCAGAACACACAAGGGCCUGAUCUUCGU  
GGUGGACAGC  
>random\_seq\_from\_cds\_\_NO\_4304 RANDOM\_LENGTH 72 SEQ\_LENGTH 58



---

```
>random_seq_from_cds__NO_4359 RANDOM_LENGTH 87 SEQ_LENGTH 76
  GC_CONTENT 0.5 BASEPAIR 24 FREE_ENERGY -18.40 LEN_BP_RATIO
  3.166666666666667
GAUGAGACAUGGAUUGUCUGCUGAGUGCCAUGCUGCUGCCAAAAUCACCAGCCCAUCACCAGUUU
UGCUCUUAAGUCCAAUAUCGAA
>random_seq_from_cds__NO_4367 RANDOM_LENGTH 97 SEQ_LENGTH 85
  GC_CONTENT 0.482352941176471 BASEPAIR 26 FREE_ENERGY
  -16.40 LEN_BP_RATIO 3.26923076923077
CCAAAUAUUGAGCUUCUCUUUGCACACCAGACAAGCCCAUCCACCUUCAUCUAUGUUAUUGGUCA
GCUGGUCAUCGACCUUCAGCCAAUGUUAGGGC
>random_seq_from_cds__NO_4391 RANDOM_LENGTH 90 SEQ_LENGTH 83
  GC_CONTENT 0.843373493975904 BASEPAIR 29 FREE_ENERGY
  -45.20 LEN_BP_RATIO 2.86206896551724
CAGCCCCAGGAGCUUCCGGGCCUCCGGGAGUCCGGCCGUGCGGGGCGCAGCCGCCCUUGUCCC
CGGGAGGCGCCGCCGGCCCGCGCCG
>random_seq_from_cds__NO_4400 RANDOM_LENGTH 90 SEQ_LENGTH 84
  GC_CONTENT 0.666666666666667 BASEPAIR 28 FREE_ENERGY
  -32.90 LEN_BP_RATIO 3
CCGUUGGGAGAAAAGGCGAGAGAAAGCACGGGGCCACGGUGGCCUGUGAAAAGCCUCACCGAGUU
CCCCUGCUGAGCGCUCCACAGCCGG
>random_seq_from_cds__NO_4402 RANDOM_LENGTH 75 SEQ_LENGTH 70
  GC_CONTENT 0.6 BASEPAIR 27 FREE_ENERGY -29.00 LEN_BP_RATIO
  2.59259259259259
UAUAUCCUCAGCGGGUACGUCCGAUCAAUGACCACAGCCUGGCGGUGCGGUCGUGGGACCCGCU
GGCGAAGUAC
>random_seq_from_cds__NO_4410 RANDOM_LENGTH 86 SEQ_LENGTH 76
  GC_CONTENT 0.473684210526316 BASEPAIR 25 FREE_ENERGY
  -23.50 LEN_BP_RATIO 3.04
CACAGGGCAGUAUUGUUGUCACUUUGGAGGUAGCGGAUAAGGUAGUUGUAGCUGUCUUCUUGGAG
ACGGACCACGUACUUGUUAUC
>random_seq_from_cds__NO_4411 RANDOM_LENGTH 69 SEQ_LENGTH 59
  GC_CONTENT 0.491525423728814 BASEPAIR 20 FREE_ENERGY
  -15.10 LEN_BP_RATIO 2.95
UAGGAAUGCUCGAAGCUUGAAGUUAGAUAGGAUGUCCUGGAUGGUUUGAGUGGUCUGUAGCUGCU
CAAU
>random_seq_from_cds__NO_4412 RANDOM_LENGTH 110 SEQ_LENGTH 87
  GC_CONTENT 0.494252873563218 BASEPAIR 33 FREE_ENERGY
  -25.30 LEN_BP_RATIO 2.63636363636364
GACAUCCUUCUGGCUAGCAUUCUGCAGAAACAUUCCAUGGAAGCGGCUGUAAAAACUUCCACUG
UGCUCUUCGGACUGUUUUGGACCAGGUUGAGAUGGAGGUAGACAA
>random_seq_from_cds__NO_4414 RANDOM_LENGTH 81 SEQ_LENGTH 66
  GC_CONTENT 0.53030303030303 BASEPAIR 22 FREE_ENERGY
  -20.90 LEN_BP_RATIO 3
CAGUCGUCCAAACUGUACUUCAUAUUGCUGGGGUUCUGCCUGGCAAGGGGCGUCAGACACUAUGU
```



```
UGGCACAACCAGAUUC
>random_seq_from_cds__NO_4416 RANDOM_LENGTH 87 SEQ_LENGTH 63
  GC_CONTENT 0.587301587301587 BASEPAIR 25 FREE_ENERGY
  -26.60 LEN_BP_RATIO 2.52
CCAUCUGAGUCCACGUACUGCCGCGUUUGAGGUAGCAGGACACUGCCAUCUGAAUCUGCUCGGU
ACGCACUCGUUUCAUAAUGCGG
>random_seq_from_cds__NO_4423 RANDOM_LENGTH 94 SEQ_LENGTH 79
  GC_CONTENT 0.531645569620253 BASEPAIR 29 FREE_ENERGY
  -28.20 LEN_BP_RATIO 2.72413793103448
UGAUCGCUGAGGACGGGCUCUCUUGGGGAAAAUUGAGAAAUGCGAGUUCUUAGAAAUGAUCGA
CGAGAAGGGCCUCAUGCGCUCACGGGUUC
>random_seq_from_cds__NO_4432 RANDOM_LENGTH 95 SEQ_LENGTH 81
  GC_CONTENT 0.518518518518518 BASEPAIR 21 FREE_ENERGY
  -19.54 LEN_BP_RATIO 3.85714285714286
UUGCUGAUGGUGUGGUUGGAGUUUAUGAAUGUCACAAUGCUGGGGAAACCAGGGAAUGGGCCUU
GACGAAGGAGAAGUCGGUGAAGCACAUGGA
>random_seq_from_cds__NO_4434 RANDOM_LENGTH 89 SEQ_LENGTH 78
  GC_CONTENT 0.666666666666667 BASEPAIR 22 FREE_ENERGY
  -26.94 LEN_BP_RATIO 3.54545454545455
AAAUGGGAACAGAUCGAGGGCAACUCCAAGCUGAGGCACGUGGGCAGCAACCUGUGCCUGGACAG
UCGCACGGCCAAGAGCGGGGGCCU
>random_seq_from_cds__NO_4457 RANDOM_LENGTH 97 SEQ_LENGTH 84
  GC_CONTENT 0.607142857142857 BASEPAIR 28 FREE_ENERGY
  -36.40 LEN_BP_RATIO 3
GCUGAUUGUGCUCAGGUAUGCGGAUGAGGAGCUCCAGCUGGACUUCGAUGACUUCUCAACUGCC
UGGUCCGGCUGGAGAAUGCGAGCCGGGGUGUU
>random_seq_from_cds__NO_4462 RANDOM_LENGTH 87 SEQ_LENGTH 76
  GC_CONTENT 0.421052631578947 BASEPAIR 26 FREE_ENERGY
  -18.80 LEN_BP_RATIO 2.92307692307692
AGGUGCUCUGAUAUGGAAGAUUAUUGACUGAAUCAGAAAUAAAUUGGAUGGUGUCAGACAAA
AGAUAUUCCAGGUAGCCCAAGA
>random_seq_from_cds__NO_4470 RANDOM_LENGTH 84 SEQ_LENGTH 78
  GC_CONTENT 0.615384615384615 BASEPAIR 26 FREE_ENERGY
  -31.50 LEN_BP_RATIO 3
GCUUCCUGGUGCUGGGCUACUUGCUCUACCUGGUCUUCGGCGCAGUGGUCUUCUCCUCGGUGGAG
CUGCCCUAUGAGGACCUGC
>random_seq_from_cds__NO_4472 RANDOM_LENGTH 72 SEQ_LENGTH 55
  GC_CONTENT 0.672727272727273 BASEPAIR 19 FREE_ENERGY
  -21.80 LEN_BP_RATIO 2.89473684210526
GGCGUGUCGGUGCUCAGCAACGCCUCGGGCAACUGGAACUGGGACUUCACCUCCGCGCUCUUCUU
CGCCAGC
>random_seq_from_cds__NO_4474 RANDOM_LENGTH 81 SEQ_LENGTH 55
  GC_CONTENT 0.654545454545455 BASEPAIR 20 FREE_ENERGY
  -22.00 LEN_BP_RATIO 2.75
```

---

UCACCCUCCUGUUCUGACGGCUGUGGUCCAGCGCAUCACCGUGCAGUCACCCGCAGGCCGGUC  
CUCUACUCCACAUC

>random\_seq\_from\_cds\_\_NO\_4503 RANDOM\_LENGTH 81 SEQ\_LENGTH 55  
GC\_CONTENT 0.454545454545455 BASEPAIR 20 FREE\_ENERGY  
-18.10 LEN\_BP\_RATIO 2.75

UGAUCAGAAGAAAGAACUGUGAGGGCUUCUAGUGCAGACUGCAAAGUCCUUAUUGGCAUCUGAAC  
GGCAGGUAGAAACGGU

>random\_seq\_from\_cds\_\_NO\_4504 RANDOM\_LENGTH 88 SEQ\_LENGTH 57  
GC\_CONTENT 0.421052631578947 BASEPAIR 21 FREE\_ENERGY  
-23.40 LEN\_BP\_RATIO 2.71428571428571

UCCAGAAUUUCACUCCUGUGGUUGUAUAAGGGUGUGAUAUUUUUCAACAGGAAAGAGAGGCA  
CACCCAUUGAUGAUGAAUAUAU

>random\_seq\_from\_cds\_\_NO\_4527 RANDOM\_LENGTH 71 SEQ\_LENGTH 63  
GC\_CONTENT 0.73015873015873 BASEPAIR 21 FREE\_ENERGY  
-24.79 LEN\_BP\_RATIO 3

CCGCCGACACCUCCACCGCCUCUGCAGCAGGUAGCGCGCUCGCUUGCGCGUCAGGGCGUCCGCC  
UGGCC

>random\_seq\_from\_cds\_\_NO\_4532 RANDOM\_LENGTH 89 SEQ\_LENGTH 70  
GC\_CONTENT 0.8 BASEPAIR 29 FREE\_ENERGY -44.90 LEN\_BP\_RATIO  
2.41379310344828

GCCCGUCCUCGCGGGGCCGAAACAUGGCCCGACGGCUGCUAGCACUCCACGGCAGCCUCGGCG  
CCAGGCGCGGCCACCCGGCGAGC

>random\_seq\_from\_cds\_\_NO\_4537 RANDOM\_LENGTH 81 SEQ\_LENGTH 58  
GC\_CONTENT 0.448275862068966 BASEPAIR 21 FREE\_ENERGY  
-20.40 LEN\_BP\_RATIO 2.76190476190476

ACCCACUCCAUAUGAGUGACACUUGACAGCGGAUGUCAUUGGUCGAAGAGUUGAAGUUAUGG  
AGAACAUGCAACAGUA

>random\_seq\_from\_cds\_\_NO\_4553 RANDOM\_LENGTH 110 SEQ\_LENGTH 104  
GC\_CONTENT 0.509615384615385 BASEPAIR 33 FREE\_ENERGY  
-29.00 LEN\_BP\_RATIO 3.15151515151515

UGCCGGGGCUCCAUGACAAUUCAAAAGGUGAAGGGAUUGCUGUCACGUCUUCUCAAAGUUCUGU  
GUCAGACCUUCUGUUGUCCUAUGAAAGUCCCAAAGAAGCCGGGCA

>random\_seq\_from\_cds\_\_NO\_4557 RANDOM\_LENGTH 86 SEQ\_LENGTH 79  
GC\_CONTENT 0.518987341772152 BASEPAIR 27 FREE\_ENERGY  
-17.90 LEN\_BP\_RATIO 2.92592592592593

CUCCCACCUAAGGAAAGCCGGCACCCAGAUUGAGAACAUCGAGGAAGACUUCAGGAAUGGCCUUA  
AGCUCAUGCUGCUUUUGGAAG

>random\_seq\_from\_cds\_\_NO\_4563 RANDOM\_LENGTH 78 SEQ\_LENGTH 72  
GC\_CONTENT 0.555555555555556 BASEPAIR 24 FREE\_ENERGY  
-17.00 LEN\_BP\_RATIO 3

UCGUGAACACCCUAAAACCCGAUGAAAGAGCCAUCAUGACGUACGUCUCUUGCUUCUACCACGCU  
UUUGCGGGCGCGG

>random\_seq\_from\_cds\_\_NO\_4567 RANDOM\_LENGTH 72 SEQ\_LENGTH 61  
GC\_CONTENT 0.60655737704918 BASEPAIR 25 FREE\_ENERGY

-32.90 LEN\_BP\_RATIO 2.44  
CUGCGGAUCAGCAACCGUCCUGCCUUAUGCCCUCGAGGGCAAGAUGGUGUCGGGAUUAUUGCUG  
GUGCCUG  
>random\_seq\_from\_cds\_\_NO\_4581 RANDOM\_LENGTH 75 SEQ\_LENGTH 55  
GC\_CONTENT 0.490909090909091 BASEPAIR 19 FREE\_ENERGY  
-19.50 LEN\_BP\_RATIO 2.89473684210526  
GAUGAAUGAGUUCAGAGCCUCCUUAACCACUUUGACAGGGAGGAAGAAUGGCCUGAUGGAUCAU  
GAGGAUUUCA  
>random\_seq\_from\_cds\_\_NO\_4582 RANDOM\_LENGTH 87 SEQ\_LENGTH 79  
GC\_CONTENT 0.556962025316456 BASEPAIR 32 FREE\_ENERGY  
-38.70 LEN\_BP\_RATIO 2.46875  
GAGCCUGCCUGAUUUCCAUGGGUUAUGACCUGGGGUGAAGCCGAAUUUGCCC GAUUAUGACCCU  
GGUAGAUCCCAACGGGCAAGGC  
>random\_seq\_from\_cds\_\_NO\_4588 RANDOM\_LENGTH 98 SEQ\_LENGTH 74  
GC\_CONTENT 0.418918918918919 BASEPAIR 26 FREE\_ENERGY  
-18.90 LEN\_BP\_RATIO 2.84615384615385  
CUGAAAGGCAACAAUGACAUUUAAGUAUAACUCAGCCUGAUGUCAUUUACCAAUCCAUAAGGG  
AAUACUUGCUGGCUGGGGCAGAUUAUCAUGAAA  
>random\_seq\_from\_cds\_\_NO\_4593 RANDOM\_LENGTH 73 SEQ\_LENGTH 55  
GC\_CONTENT 0.527272727272727 BASEPAIR 21 FREE\_ENERGY  
-17.60 LEN\_BP\_RATIO 2.61904761904762  
UGCCAAUGCCAAGGGCAGCCUUGUUUGCACUCCAAAUCUUUUUGAGGAGAAAUAUGCUCCCCGG  
CCUAUCUU  
>random\_seq\_from\_cds\_\_NO\_4594 RANDOM\_LENGTH 84 SEQ\_LENGTH 64  
GC\_CONTENT 0.53125 BASEPAIR 27 FREE\_ENERGY -28.91  
LEN\_BP\_RATIO 2.37037037037037  
UGAUUUCAGGGACGAUCGUUGAUAAAAGUGGGCGGACUCUUUCCGGACAGACAGGAGAGGGAUUU  
GUCAUCAGCGUGUCUCAUG  
>random\_seq\_from\_cds\_\_NO\_4597 RANDOM\_LENGTH 78 SEQ\_LENGTH 71  
GC\_CONTENT 0.464788732394366 BASEPAIR 22 FREE\_ENERGY  
-21.29 LEN\_BP\_RATIO 3.22727272727273  
UGAUGGCCAAGCACCUAAAGGGAUUUUGCUAUGGAUGGCUUGGUCAAUAUAGUUGGAGGAUGCUG  
UGGGUCAACACCA  
>random\_seq\_from\_cds\_\_NO\_4602 RANDOM\_LENGTH 86 SEQ\_LENGTH 81  
GC\_CONTENT 0.45679012345679 BASEPAIR 26 FREE\_ENERGY  
-19.40 LEN\_BP\_RATIO 3.11538461538462  
CCAAUUUUGCUGUGAUUGAAGCUGGGUUAAGUGCUGCCAAGGGAAGUGCAUUGUCAAUAGCAUU  
AGUCUGAAGGAAGGAGAGGAC  
>random\_seq\_from\_cds\_\_NO\_4607 RANDOM\_LENGTH 89 SEQ\_LENGTH 78  
GC\_CONTENT 0.461538461538462 BASEPAIR 28 FREE\_ENERGY  
-26.60 LEN\_BP\_RATIO 2.78571428571429  
AGAAGCAAUGCAUGGGGUUUUCCUUUACCAUGCAAUCAAGGUCUGGCAUGGACAUGGGGAUAGUG  
AAUGCUGGAAACCUCCUGUGUAU  
>random\_seq\_from\_cds\_\_NO\_4612 RANDOM\_LENGTH 70 SEQ\_LENGTH 54

---

```
GC_CONTENT    0.5 BASEPAIR    20 FREE_ENERGY   -15.20 LEN_BP_RATIO
2.7
GCUGUUGGCCACCUUAUCCCUUUC AUGGAAAAAGAAAGAGAAGAAACCAGAGUGCUUAACGGCAC
AGUAG
>random_seq_from_cds__NO_4633 RANDOM_LENGTH 87 SEQ_LENGTH    79
GC_CONTENT    0.594936708860759 BASEPAIR    29 FREE_ENERGY
-32.10 LEN_BP_RATIO 2.72413793103448
CUGGCAGACUGACACGCUGCAGUGCAGAUGCACCCGGUCCCCUGAGGGCCUGUUUCUCCACUGUA
GGGUUCACAAAGCUGAAGGUGA
>random_seq_from_cds__NO_4634 RANDOM_LENGTH 69 SEQ_LENGTH    56
GC_CONTENT    0.589285714285714 BASEPAIR    19 FREE_ENERGY
-21.30 LEN_BP_RATIO 2.94736842105263
AGAUGCUGAAGCGCUGGUGGUGAGAGGGAAAUGGAAGAUCCAAGGCUUUCUGGACAGGGAUCAGC
UGGG
>random_seq_from_cds__NO_4637 RANDOM_LENGTH 109 SEQ_LENGTH    100
GC_CONTENT    0.52 BASEPAIR    36 FREE_ENERGY   -32.80
LEN_BP_RATIO 2.77777777777778
GGUAGUCACCAACACCGUAGUAAGAGCCAUAGUUUUUAUCCUUUGGCAAUCUGAAGUCCAGAGU
GAGGGGUCCAGGCUGGGUCUCAGGAAAGGGUGGUGGGAGAGUGA
>random_seq_from_cds__NO_4664 RANDOM_LENGTH 68 SEQ_LENGTH    48
GC_CONTENT    0.416666666666667 BASEPAIR    19 FREE_ENERGY
-16.00 LEN_BP_RATIO 2.52631578947368
AGCUUUAUAACUGGGGUCUGGCAUGCGUUCUGUCACACCUCCAAUCUUAAGUUCAUCGUAGAU
CUC
>random_seq_from_cds__NO_4672 RANDOM_LENGTH 110 SEQ_LENGTH    96
GC_CONTENT    0.625 BASEPAIR    32 FREE_ENERGY   -43.20
LEN_BP_RATIO 3
AGCCCCGGGGCAAAGAGCCUGAUGAGACUGUGCACAGUUUUGCCCAGCGCCGUUGGACCUGAG
GGUGGCGUCUCUAGCCAUGGACAGUCUCUGCCGUGGAGUGUUUGC
>random_seq_from_cds__NO_4678 RANDOM_LENGTH 78 SEQ_LENGTH    66
GC_CONTENT    0.515151515151515 BASEPAIR    24 FREE_ENERGY
-21.80 LEN_BP_RATIO 2.75
CCAUCUGCCUGUCCAGGGGAUUUGGACAUUUGGUGCCAUCUUCAGAAGAUAUCCAGGAGUCCUGGGA
AUCGUGUAUGACU
>random_seq_from_cds__NO_4694 RANDOM_LENGTH 75 SEQ_LENGTH    70
GC_CONTENT    0.471428571428571 BASEPAIR    25 FREE_ENERGY
-17.60 LEN_BP_RATIO 2.8
CAAGCCAGACAGGAGCUUGGAUCUAGGAGGCAGUAUGGUAAUAAAUUUGUGGAUGCGCUUCAGG
AGCGUGGUUU
>random_seq_from_cds__NO_4699 RANDOM_LENGTH 84 SEQ_LENGTH    66
GC_CONTENT    0.515151515151515 BASEPAIR    21 FREE_ENERGY
-16.60 LEN_BP_RATIO 3.14285714285714
UGGGUGGCGUUGGUAGGAUGGAUCAGAAUAUUGCCAAGUACAAGGUGAAGAUAUCCGAGGCAUGAAG
UGGUACUCAAGCUUUAUUG
```

---

```
>random_seq_from_cds__NO_4707 RANDOM_LENGTH 84 SEQ_LENGTH 66
  GC_CONTENT 0.575757575757576 BASEPAIR 19 FREE_ENERGY
  -19.63 LEN_BP_RATIO 3.47368421052632
CUUUCUCCUGCGUGUCCCUGCUUCUCCUCGCCGGUCUCCUCCGCAGGGUUCUCUUCUUCUUGUUU
CUGGGACAUGUUAGCCGUC
>random_seq_from_cds__NO_4708 RANDOM_LENGTH 102 SEQ_LENGTH 78
  GC_CONTENT 0.474358974358974 BASEPAIR 24 FREE_ENERGY
  -19.30 LEN_BP_RATIO 3.25
UUCUUUUGGGGGUGUGUACCAGCCCGUUUUUUUCGUGGAUCUGCACCAAGGACUUGUAGGACUGC
UGUGCUCUUGUCAGACUGUAUUGAGACUUUGUUGGCU
>random_seq_from_cds__NO_4717 RANDOM_LENGTH 84 SEQ_LENGTH 74
  GC_CONTENT 0.608108108108108 BASEPAIR 26 FREE_ENERGY
  -26.10 LEN_BP_RATIO 2.84615384615385
GGGUCAUCAGACUCCACCGACCAGAUGGGGGGCACAGCAGGGUAUGACUCCCGUGAUGUUGCAGU
GGAUGCGGACAGGAUCCCC
>random_seq_from_cds__NO_4719 RANDOM_LENGTH 81 SEQ_LENGTH 61
  GC_CONTENT 0.704918032786885 BASEPAIR 20 FREE_ENERGY
  -28.10 LEN_BP_RATIO 3.05
GAACUCGCAGCUCAGCUCGUCCAGGCAGGCGCUGGCAAUGCGGAAGCGCUCGUGGCCGCGGUGGA
AGAUGGACUCGAGCAG
>random_seq_from_cds__NO_4728 RANDOM_LENGTH 89 SEQ_LENGTH 77
  GC_CONTENT 0.519480519480519 BASEPAIR 22 FREE_ENERGY
  -24.43 LEN_BP_RATIO 3.5
CAAGCCAGGGUCACUGUUCAUGGUCUGAACGAUUUCAUGCCCCUGGUUGAGCACAACCCAGUUU
GGGUCAAUCUGAGCAUCACCCUCA
>random_seq_from_cds__NO_4757 RANDOM_LENGTH 86 SEQ_LENGTH 72
  GC_CONTENT 0.458333333333333 BASEPAIR 25 FREE_ENERGY
  -15.60 LEN_BP_RATIO 2.88
GAUGAAAUUUUAAACUUAGACACUCAGCUCAGGCCUGCUUCCAUGGGCGAACAGUGGUCCAA
GUACAAAUGGCUGUCAGUUCU
>random_seq_from_cds__NO_4763 RANDOM_LENGTH 87 SEQ_LENGTH 75
  GC_CONTENT 0.466666666666667 BASEPAIR 26 FREE_ENERGY
  -19.11 LEN_BP_RATIO 2.88461538461538
GUGCUGGUGCCUGCUGCUAAAGUUUGUCCUGCUCCCGAAGCACUGGUCACACAACCAACUGAAU
GCAGAGAGUAAUAGUAAACUCA
>random_seq_from_cds__NO_4768 RANDOM_LENGTH 78 SEQ_LENGTH 69
  GC_CONTENT 0.420289855072464 BASEPAIR 28 FREE_ENERGY
  -18.30 LEN_BP_RATIO 2.46428571428571
AGUGAUGGUUGUCAUUGUUUGAGGAGGUUUUAAUGCAUUUCAUUGGCCGAUUCUACAAAUGAAU
GAGGACUGAGCCA
>random_seq_from_cds__NO_4770 RANDOM_LENGTH 89 SEQ_LENGTH 53
  GC_CONTENT 0.471698113207547 BASEPAIR 19 FREE_ENERGY
  -15.50 LEN_BP_RATIO 2.78947368421053
UUCAUAUCUUAAUAAUUAUCCCAUUUAGUCCCGUGGUGGAGACCAUUCUACAUGAAGUUCUGUA
```

---

GAACUGAUUUUCUGCAUCUUAGGU

>random\_seq\_from\_cds\_\_NO\_4772 RANDOM\_LENGTH 75 SEQ\_LENGTH 58  
GC\_CONTENT 0.482758620689655 BASEPAIR 19 FREE\_ENERGY  
-17.80 LEN\_BP\_RATIO 3.05263157894737

CAGAAAAAUCGUACUUGGCAAUGGAACCAGAUUCCAGAUGGUAGCUGAGGUUUC AUGACCUUCG  
UAGGAAACAC

>random\_seq\_from\_cds\_\_NO\_4779 RANDOM\_LENGTH 94 SEQ\_LENGTH 84  
GC\_CONTENT 0.464285714285714 BASEPAIR 26 FREE\_ENERGY  
-21.97 LEN\_BP\_RATIO 3.23076923076923

UUACAAGGCUGACAUCUCCAGUCUGAGGAUCAAAUCCAAAGUAAUGGUCUUUGCAUUGGUCAC  
AACGUUGCCCAGCAAUGGAAGCAUCUUGG

>random\_seq\_from\_cds\_\_NO\_4780 RANDOM\_LENGTH 78 SEQ\_LENGTH 55  
GC\_CONTENT 0.509090909090909 BASEPAIR 21 FREE\_ENERGY  
-19.50 LEN\_BP\_RATIO 2.61904761904762

CAAACACACUGACCAGUCAGGCUAUUACAGAUGUGAUUAACUGCACCAGUUGUAUGGCAUGAGCA  
UGGCAGGCAGCCA

>random\_seq\_from\_cds\_\_NO\_4787 RANDOM\_LENGTH 88 SEQ\_LENGTH 67  
GC\_CONTENT 0.432835820895522 BASEPAIR 23 FREE\_ENERGY  
-22.72 LEN\_BP\_RATIO 2.91304347826087

AAGUCCUUUGGCUUCUUUUUUGCACUCACACUGCCCAGAGUGAGGAUUGCAGAAUUGUUCACUG  
AGCCAUGGAGGUACACUGGCAG

>random\_seq\_from\_cds\_\_NO\_4794 RANDOM\_LENGTH 81 SEQ\_LENGTH 64  
GC\_CONTENT 0.453125 BASEPAIR 22 FREE\_ENERGY -17.70  
LEN\_BP\_RATIO 2.90909090909091

UGGAAUGGCUGUUGCAUUGACAAGGUUUACA AUUGAAAGCGUAAACUUGAUCACCUUGGCGGAAA  
GGCUUGUCAUUUAAAA

>random\_seq\_from\_cds\_\_NO\_4803 RANDOM\_LENGTH 90 SEQ\_LENGTH 78  
GC\_CONTENT 0.564102564102564 BASEPAIR 27 FREE\_ENERGY  
-28.70 LEN\_BP\_RATIO 2.88888888888889

UUCAACCGUGACACUCUAUUAUCAGCUGUGUCUCCUGCAUCAUUAGGAAUGCAGUACCGCUGUGC  
CAAAGGGUGGACCCGCGGGUGGCUG

>random\_seq\_from\_cds\_\_NO\_4838 RANDOM\_LENGTH 84 SEQ\_LENGTH 72  
GC\_CONTENT 0.597222222222222 BASEPAIR 25 FREE\_ENERGY  
-26.80 LEN\_BP\_RATIO 2.88

ACUAAAAGGCCUGUGAGGCUGGAAGAGUGACACGCUAUGGGAUUGCAGGUCCUUGGUCACUACCUC  
CGGCGGCAGCGAGAUCCEA

>random\_seq\_from\_cds\_\_NO\_4841 RANDOM\_LENGTH 97 SEQ\_LENGTH 80  
GC\_CONTENT 0.6 BASEPAIR 26 FREE\_ENERGY -33.00 LEN\_BP\_RATIO  
3.07692307692308

GAUGGGAUUCUUUUUGGGAUGGUGGGGGCCUAUGACUGGGGAGGCUCUGUGCUAUGGCUUGAAGG  
AGGCCACCGCCUUUUUCCCCCACGAAUGGCAC

>random\_seq\_from\_cds\_\_NO\_4849 RANDOM\_LENGTH 72 SEQ\_LENGTH 48  
GC\_CONTENT 0.5625 BASEPAIR 19 FREE\_ENERGY -23.00  
LEN\_BP\_RATIO 2.52631578947368

UCCAUCUGACCCCAUCACUGGAGGUGACCCACAGGCCAUCAGUGUGGUUCAGAGGGACUGUAGG  
CGGCGAG

>random\_seq\_from\_cds\_\_NO\_4852 RANDOM\_LENGTH 86 SEQ\_LENGTH 62  
GC\_CONTENT 0.548387096774194 BASEPAIR 22 FREE\_ENERGY  
-18.80 LEN\_BP\_RATIO 2.81818181818182

CUACACUCCAUGUGCUGGGAUACAUCAGAUUACCUCGGCCAGUGGCCUUGACUGUGACCUUUG  
CCUUGGACAAUACUACAAAGC

>random\_seq\_from\_cds\_\_NO\_4853 RANDOM\_LENGTH 88 SEQ\_LENGTH 67  
GC\_CONTENT 0.611940298507463 BASEPAIR 23 FREE\_ENERGY  
-31.00 LEN\_BP\_RATIO 2.91304347826087

CAGGGCCUGUGCUGAAUGAGGGCUCACCCACCUCUAUACAAAAGCUGGGUCCCUUCUCAAAGGA  
UUGUGGCCUGACAAUGAAUGUG

>random\_seq\_from\_cds\_\_NO\_4855 RANDOM\_LENGTH 110 SEQ\_LENGTH 99  
GC\_CONTENT 0.484848484848485 BASEPAIR 28 FREE\_ENERGY  
-26.70 LEN\_BP\_RATIO 3.53571428571429

CGGAAAGUGCUGGUAUCUACAACUCUGGAGAACAGAAAGGAAAAUGCUUACAAUACGAGCCUGAG  
UCUCAUCUUCUCUAGAAACCUCACCUGGCCAGUCUCACUCCUCA

>random\_seq\_from\_cds\_\_NO\_4864 RANDOM\_LENGTH 98 SEQ\_LENGTH 80  
GC\_CONTENT 0.5875 BASEPAIR 25 FREE\_ENERGY -29.70  
LEN\_BP\_RATIO 3.2

CCGAAGAGGGCAGUGUCCUACAGCUGACUGAAGCCUCCCGUUGGAGUGAGGAGCCUCUUGGAGGU  
GGUUCAGACCCGGCCUAUCCUCAUCUCCUGUG

>random\_seq\_from\_cds\_\_NO\_4865 RANDOM\_LENGTH 68 SEQ\_LENGTH 61  
GC\_CONTENT 0.59016393442623 BASEPAIR 22 FREE\_ENERGY  
-31.50 LEN\_BP\_RATIO 2.77272727272727

GAUCCUCAUAGGCAGUGUCCUGGGAGGGUUGCUCCUGCUUGCUCUCCUUGUCUUCUGCCUGUGGA  
AGG

>random\_seq\_from\_cds\_\_NO\_4881 RANDOM\_LENGTH 85 SEQ\_LENGTH 60  
GC\_CONTENT 0.65 BASEPAIR 22 FREE\_ENERGY -30.60  
LEN\_BP\_RATIO 2.72727272727273

UCAGCACCCUGGCUCUGGCCAUGGCGGGAGGAAGGCUGGCCUUGGUCCUGCCUCAGAGCCCAUUG  
CUCACACUCUCCUUGGACC

>random\_seq\_from\_cds\_\_NO\_4885 RANDOM\_LENGTH 70 SEQ\_LENGTH 58  
GC\_CONTENT 0.689655172413793 BASEPAIR 22 FREE\_ENERGY  
-27.80 LEN\_BP\_RATIO 2.63636363636364

GGAGCGUGUUGCGGCGAGCCAUGGGGAGGUGGAGCGACUUGAGCGUCAUGGCCUCCAUGCCCCGC  
ACCAU

>random\_seq\_from\_cds\_\_NO\_4886 RANDOM\_LENGTH 65 SEQ\_LENGTH 55  
GC\_CONTENT 0.636363636363636 BASEPAIR 21 FREE\_ENERGY  
-25.90 LEN\_BP\_RATIO 2.61904761904762

GCUGUUCAUACCUCAGGCUGUGGCGCUUGUUCACAGUGCCGUGGUGCUUGGUGGCCGUGAGGG

>random\_seq\_from\_cds\_\_NO\_4888 RANDOM\_LENGTH 81 SEQ\_LENGTH 67  
GC\_CONTENT 0.73134328358209 BASEPAIR 26 FREE\_ENERGY  
-38.90 LEN\_BP\_RATIO 2.57692307692308

GGGUCACCAGGUCCGGGUCGUCGCCGUCGACGUACUUGGGCGGUGGCUGGCCAGGUCUGGGGUG  
CUGGUGGCAGGUCGUG

>random\_seq\_from\_cds\_\_NO\_4891 RANDOM\_LENGTH 83 SEQ\_LENGTH 65  
GC\_CONTENT 0.523076923076923 BASEPAIR 21 FREE\_ENERGY  
-21.60 LEN\_BP\_RATIO 3.0952380952381

AUUAUUCUUUGGGUUCUCUGGUCAGAUGGACUGACAAGUUUGUUGCUGUAGACCCCUUGGGCC  
CAUAAGGGACAGUGUAGG

>random\_seq\_from\_cds\_\_NO\_4892 RANDOM\_LENGTH 81 SEQ\_LENGTH 74  
GC\_CONTENT 0.554054054054054 BASEPAIR 25 FREE\_ENERGY  
-20.52 LEN\_BP\_RATIO 2.96

GGUGCCUCUCCCGCAUCUCCGGUUGGCUGUACACCAGAUCUCCUGGCUGGUUGUAGGCAUGGGUG  
UUGAUAAUGUUGAGGU

>random\_seq\_from\_cds\_\_NO\_4906 RANDOM\_LENGTH 70 SEQ\_LENGTH 59  
GC\_CONTENT 0.593220338983051 BASEPAIR 22 FREE\_ENERGY  
-17.70 LEN\_BP\_RATIO 2.68181818181818

GGCAUUCUUGCCUGUGCUUCCACCGACAGCGUGCACUCGAUAACAUGCUGUCCAGCAGGCGA  
AUCCG

>random\_seq\_from\_cds\_\_NO\_4911 RANDOM\_LENGTH 80 SEQ\_LENGTH 69  
GC\_CONTENT 0.478260869565217 BASEPAIR 26 FREE\_ENERGY  
-22.70 LEN\_BP\_RATIO 2.65384615384615

CAUCAUCAUCAUCGGUGUGGGUUGUCUCUUAUGAGUUAGUUGCUGUCAUUCUUGAUGACGACCU  
CUAAUCCGUGGUGCC

>random\_seq\_from\_cds\_\_NO\_4928 RANDOM\_LENGTH 80 SEQ\_LENGTH 66  
GC\_CONTENT 0.666666666666667 BASEPAIR 22 FREE\_ENERGY  
-24.80 LEN\_BP\_RATIO 3

AACCCAUCGGACUCCCAUCUCGAUCCAGGCUGCAGGAUCCAGUAGCAGCUGGGGCACCUGGCC  
CAGAGGUUCUGCCAC

>random\_seq\_from\_cds\_\_NO\_4931 RANDOM\_LENGTH 87 SEQ\_LENGTH 75  
GC\_CONTENT 0.693333333333333 BASEPAIR 28 FREE\_ENERGY  
-38.00 LEN\_BP\_RATIO 2.67857142857143

CAGCAGGAUCCAGCCUCCUUCAGUCUCCCUUGAGGGGGUGGCCUCUGCUCUCCAGUGGGG  
UCCCACCUGGGGGAGGUGGGGG

>random\_seq\_from\_cds\_\_NO\_4932 RANDOM\_LENGTH 81 SEQ\_LENGTH 72  
GC\_CONTENT 0.597222222222222 BASEPAIR 28 FREE\_ENERGY  
-28.90 LEN\_BP\_RATIO 2.57142857142857

ACCUGAGGUAGAAGCCCAGGGGAGUGGAGUCUGGAAGGGUCUCCCCGAGCUCAUCCUCCUCGCUC  
UCUUCUCUGCUCUCCU

>random\_seq\_from\_cds\_\_NO\_4939 RANDOM\_LENGTH 95 SEQ\_LENGTH 86  
GC\_CONTENT 0.686046511627907 BASEPAIR 29 FREE\_ENERGY  
-29.30 LEN\_BP\_RATIO 2.96551724137931

GGCCUGGCUCAGUCCCGCAGCAGACUCACCCAUGGCAGGCUCUGACCCCAACAUGACCUCUGGG  
GAGGCUUGGUCACCCCUUGGGGCCACAUCA

>random\_seq\_from\_cds\_\_NO\_4950 RANDOM\_LENGTH 71 SEQ\_LENGTH 53  
GC\_CONTENT 0.490566037735849 BASEPAIR 19 FREE\_ENERGY



---

-18.60 LEN\_BP\_RATIO 2.78947368421053  
CCCUAGAGACCUCCGUCGCUGUUGAGUCUCUUUUUCAAGAGUUCUCA AUGUCUCUUGGUCCUGU  
CUUCUA  
>random\_seq\_from\_cds\_\_NO\_4957 RANDOM\_LENGTH 82 SEQ\_LENGTH 72  
GC\_CONTENT 0.513888888888889 BASEPAIR 23 FREE\_ENERGY  
-27.80 LEN\_BP\_RATIO 3.1304347826087  
UCUCCCUUUCUAGUGUCUCAUGGCUCUGGUUUUCCAGAGUCUUCAGUGACUCUUGAAUCUCCUCU  
CCCAGAGACUUCAGGGU  
>random\_seq\_from\_cds\_\_NO\_4961 RANDOM\_LENGTH 83 SEQ\_LENGTH 77  
GC\_CONTENT 0.701298701298701 BASEPAIR 26 FREE\_ENERGY  
-36.60 LEN\_BP\_RATIO 2.96153846153846  
GGGACUGGCCUGUACUGGCCUCUUGCCGCUGGCCCCAGGCUCUCUGGUCCAGGCAGGACGCUG  
GCAGGAAUGGCCACCCUG  
>random\_seq\_from\_cds\_\_NO\_4963 RANDOM\_LENGTH 71 SEQ\_LENGTH 53  
GC\_CONTENT 0.622641509433962 BASEPAIR 19 FREE\_ENERGY  
-17.20 LEN\_BP\_RATIO 2.78947368421053  
CUGAGGUGUGGGGGGAUGGGGGUGCUGGCCAAGGUAGGGGUACGGGCCUGGAGGAAUUCUUGGU  
UCUUA  
>random\_seq\_from\_cds\_\_NO\_4970 RANDOM\_LENGTH 89 SEQ\_LENGTH 80  
GC\_CONTENT 0.725 BASEPAIR 24 FREE\_ENERGY -32.69  
LEN\_BP\_RATIO 3.33333333333333  
CUGGCCAGCGACGUCUCCAUGUGGCCACGCGCUCUGGUAGCCGCGCACUGCCCCGCGCCACG  
CCUCGCCAGUCGCCUUGCCAGCU  
>random\_seq\_from\_cds\_\_NO\_4974 RANDOM\_LENGTH 75 SEQ\_LENGTH 64  
GC\_CONTENT 0.78125 BASEPAIR 23 FREE\_ENERGY -27.00  
LEN\_BP\_RATIO 2.78260869565217  
CCAGGUUGUCGCGGCCACCUCGGCCGCGUGCUUCUCCCGCCAGCGUUGGUCAACGAGGGCCCGC  
AGGGCCGCCA  
>random\_seq\_from\_cds\_\_NO\_4997 RANDOM\_LENGTH 81 SEQ\_LENGTH 69  
GC\_CONTENT 0.492753623188406 BASEPAIR 23 FREE\_ENERGY  
-18.20 LEN\_BP\_RATIO 3  
UGUGUUCCCAAGGCCUCCCAUCUGAAUGAGACAUUGUCAUCUGCAUCCUCCACAGAGCAAGUCA  
GAUGGAGCUCACAGGU  
>random\_seq\_from\_cds\_\_NO\_4999 RANDOM\_LENGTH 82 SEQ\_LENGTH 65  
GC\_CONTENT 0.523076923076923 BASEPAIR 24 FREE\_ENERGY  
-24.10 LEN\_BP\_RATIO 2.70833333333333  
GUGUAACUGGACAGCUUUGCAGAGGUCUUUGUGGAUAUCUGGGCUCUGUAAGAGCCUGUGUCUUC  
CAUCUUCAGGUUGCUGA  
>random\_seq\_from\_cds\_\_NO\_5002 RANDOM\_LENGTH 86 SEQ\_LENGTH 74  
GC\_CONTENT 0.5 BASEPAIR 27 FREE\_ENERGY -26.40 LEN\_BP\_RATIO  
2.74074074074074  
AACUCCAGGGGAAGAGUUACUGACUCCCCAGAAUCCCGUUCACCAUCA AUGGGGUUAAGCUGCU  
UUGUGAAACUACAUCCUCCUG  
>random\_seq\_from\_cds\_\_NO\_5019 RANDOM\_LENGTH 89 SEQ\_LENGTH 76

---

```
GC_CONTENT    0.473684210526316    BASEPAIR    26    FREE_ENERGY
-23.90    LEN_BP_RATIO    2.92307692307692
UCAUUGGGAGAAGCUGUCUUUGCUCGGUGCUUAUCAUCUCUGAAGGAUGAGAGAAUUCAAGCUAG
CAAAAAGCUGAAGGGUCCCCAGAA
>random_seq_from_cds__NO_5031    RANDOM_LENGTH    110    SEQ_LENGTH    103
GC_CONTENT    0.621359223300971    BASEPAIR    36    FREE_ENERGY
-41.20    LEN_BP_RATIO    2.8611111111111111
CCCUUCAUCUCAGGGUCCAGAGGUGACUGGUGUGGAUCCUGCUCGCUGUGCCAAGAUGGCCCUCC
AGAUGCGGCAUACCAUCCCUCCCCUGAUGCGGGUGUAGAUGAGG
>random_seq_from_cds__NO_5034    RANDOM_LENGTH    69    SEQ_LENGTH    52
GC_CONTENT    0.615384615384615    BASEPAIR    19    FREE_ENERGY
-15.50    LEN_BP_RATIO    2.73684210526316
GCACCAGGGCCUGGUACUCCCGUCCUCCCCGCCAGGAUUUCGCGCAGCCCGAUCAGUCUCUGC
CCUC
>random_seq_from_cds__NO_5039    RANDOM_LENGTH    69    SEQ_LENGTH    58
GC_CONTENT    0.706896551724138    BASEPAIR    21    FREE_ENERGY
-28.90    LEN_BP_RATIO    2.76190476190476
CUGGGCGAGCUGCCGGCGGUUGGGAGUGUGGAUGUGUGCCCCGAGGCAGCGCAGCAGCUCUCCA
CAUG
>random_seq_from_cds__NO_5046    RANDOM_LENGTH    110    SEQ_LENGTH    100
GC_CONTENT    0.53    BASEPAIR    32    FREE_ENERGY    -30.50
LEN_BP_RATIO    3.125
CCAUCUCA AUGACAGUGCAGCCCAGUGACCAGAUGUCAGCUGCUUCCCAUACCCGCGUGGGCCC
UGGUCAAUGAUUUCUGGGCCAUUAUCUGCAGAGUCCCCUGUGAA
>random_seq_from_cds__NO_5078    RANDOM_LENGTH    72    SEQ_LENGTH    66
GC_CONTENT    0.636363636363636    BASEPAIR    21    FREE_ENERGY
-27.59    LEN_BP_RATIO    3.14285714285714
ACUUCUCCGGCGGUGGUGUCUGUGGAUGGGCGGCCCGUGAGACUCCAACUCUGUGACACUGCCGG
ACAGGGA
>random_seq_from_cds__NO_5101    RANDOM_LENGTH    71    SEQ_LENGTH    63
GC_CONTENT    0.571428571428571    BASEPAIR    21    FREE_ENERGY
-18.30    LEN_BP_RATIO    3
CCCUUCCUCGUCGUGGUACCCAACCUGUGGGUUCUCUAGAACUAAAGUCUGCCUGCCAGGUGACU
GCUGGA
>random_seq_from_cds__NO_5103    RANDOM_LENGTH    92    SEQ_LENGTH    78
GC_CONTENT    0.551282051282051    BASEPAIR    28    FREE_ENERGY
-30.20    LEN_BP_RATIO    2.78571428571429
CUUGAGUCAUGUCCUGGUGAGACGGUUGUGGCAGAAGAUCCCGCCGGGCUGAAGGGUCCCUUGC
UACUACACCAGAAGCAGGCAUUGGCUU
>random_seq_from_cds__NO_5111    RANDOM_LENGTH    95    SEQ_LENGTH    91
GC_CONTENT    0.450549450549451    BASEPAIR    27    FREE_ENERGY
-21.73    LEN_BP_RATIO    3.37037037037037
AGUCAGGUUGACAAUGGCUCAAAAGAAAGGAGGAGAACGGUUAAGUAUUUUAAACCAAGAGCCUUU
GCUGAGGAGAACAAAAGACCAGCUGGACUC
```

---

```
>random_seq_from_cds__NO_5117 RANDOM_LENGTH 87 SEQ_LENGTH 79
GC_CONTENT 0.468354430379747 BASEPAIR 27 FREE_ENERGY
-17.90 LEN_BP_RATIO 2.92592592592593
UUUCCCUUAACGGCACCUUCUUCUUAAGAUGGAGCUUUUUGAAGGCAUGCGAGAGAGCACCAAGGAU
UUCAUCUCUGUUGGCAGAAUUG
>random_seq_from_cds__NO_5128 RANDOM_LENGTH 75 SEQ_LENGTH 52
GC_CONTENT 0.480769230769231 BASEPAIR 19 FREE_ENERGY
-18.80 LEN_BP_RATIO 2.73684210526316
GAUGAAAUGAGGCACAAGCUGGCUGGAUUGAGGGGGCAGCCAUCUUUCUCAGUGAUCAUCGU
GGUGUUAGUG
>random_seq_from_cds__NO_5129 RANDOM_LENGTH 67 SEQ_LENGTH 58
GC_CONTENT 0.517241379310345 BASEPAIR 21 FREE_ENERGY
-15.80 LEN_BP_RATIO 2.76190476190476
ACUGCCUUUAUGAUUGGAGCAAAGAGAAGCAAUUCGGGGCUGCAGUGCCGAUUGAACAGGA
GC
>random_seq_from_cds__NO_5137 RANDOM_LENGTH 75 SEQ_LENGTH 57
GC_CONTENT 0.526315789473684 BASEPAIR 20 FREE_ENERGY
-22.76 LEN_BP_RATIO 2.85
GUACUCCCAUCUACAUCAGUACUUGUCAAGUUCUUCAUCAUCGGCAUCACUGUACUGGUGGUG
GCUGUGCCAG
>random_seq_from_cds__NO_5149 RANDOM_LENGTH 110 SEQ_LENGTH 85
GC_CONTENT 0.576470588235294 BASEPAIR 26 FREE_ENERGY
-30.30 LEN_BP_RATIO 3.26923076923077
AACGAGAAAGGCGAGGGUAGAGCAAGAAAAGCUGGACAAGAUCUGGCCUAAGCUUCGGGUCCUGG
CGCGAUCUUCUCCCACUGACAAGCACACCCUGGUGAAAAGGGCAUA
>random_seq_from_cds__NO_5151 RANDOM_LENGTH 82 SEQ_LENGTH 57
GC_CONTENT 0.508771929824561 BASEPAIR 19 FREE_ENERGY
-18.30 LEN_BP_RATIO 3
GGAUGUUGGUUUUGCCAUGGGGCAUCGCAGGCACAGAUGUAGCAAAGGAGGCUUCAGACAUCAUC
CUAACAGAUGACAACUU
>random_seq_from_cds__NO_5152 RANDOM_LENGTH 73 SEQ_LENGTH 60
GC_CONTENT 0.516666666666667 BASEPAIR 22 FREE_ENERGY
-22.10 LEN_BP_RATIO 2.72727272727273
CACCAGCAUUGUGAAGGCAGUGAUGUGGGGACGAAAUGUCUAUGACAGCAUCUCCAAGUCCUGC
AGUCCAG
>random_seq_from_cds__NO_5156 RANDOM_LENGTH 82 SEQ_LENGTH 71
GC_CONTENT 0.422535211267606 BASEPAIR 24 FREE_ENERGY
-20.41 LEN_BP_RATIO 2.95833333333333
CAUUCUAUCAGCUCAUUGUCAUCUUUAUCCUUGUCUUUGCGGGGUGAGAAUUCUUUGAUUAUGA
UAGUGGGAGGAAGGCAC
>random_seq_from_cds__NO_5164 RANDOM_LENGTH 89 SEQ_LENGTH 77
GC_CONTENT 0.506493506493506 BASEPAIR 23 FREE_ENERGY
-17.59 LEN_BP_RATIO 3.34782608695652
UAAGUUUGGACUAGGGUGCUCCUGUUGGAUGGUGAGGUCACUCCAUAUGCCAAUACAAACAACA
```

```
AUGCGGUGGAUUGCAACCAAGUGC
>random_seq_from_cds__NO_5182 RANDOM_LENGTH 82 SEQ_LENGTH 71
  GC_CONTENT 0.71830985915493 BASEPAIR 23 FREE_ENERGY
  -32.10 LEN_BP_RATIO 3.08695652173913
GGGACGGAGCGGGAGGCCGAGGCUGGGGGCAGGUCCCCGGCGCACGCCCAUAAGCAGAAUCCCCAG
GGCCAGACUGACUCCCA
>random_seq_from_cds__NO_5209 RANDOM_LENGTH 110 SEQ_LENGTH 89
  GC_CONTENT 0.426966292134831 BASEPAIR 30 FREE_ENERGY
  -28.30 LEN_BP_RATIO 2.966666666666667
AACAUUGAUGAUUCUGGGCUAGAGCUUGAUAAUAACAAUGCAGCAAUGGCAAUUGAUCCAGUAA
UGGAUGGUGCUAGUGAAAUUGAAUUGAUUAGUAUUCAGGCCUCAUCCCA
>random_seq_from_cds__NO_5210 RANDOM_LENGTH 89 SEQ_LENGTH 70
  GC_CONTENT 0.428571428571429 BASEPAIR 23 FREE_ENERGY
  -17.60 LEN_BP_RATIO 3.04347826086957
CACUUAUGGAAAAAGAUGACAGUGCACAGACGAGGAUACAUAAGACUUCUGGUAACGCCACUGU
UGAUCACUUAUCCAAGUAUCUGGC
>random_seq_from_cds__NO_5225 RANDOM_LENGTH 78 SEQ_LENGTH 65
  GC_CONTENT 0.430769230769231 BASEPAIR 23 FREE_ENERGY
  -19.80 LEN_BP_RATIO 2.82608695652174
AAAGAGUCUUGACAUUGGAAUGGCUGAGGAUGUAGGAACAAAUUCUGCAACUUGUUCUAUGAAA
UCAGGGUUCAGCU
>random_seq_from_cds__NO_5232 RANDOM_LENGTH 71 SEQ_LENGTH 49
  GC_CONTENT 0.551020408163265 BASEPAIR 20 FREE_ENERGY
  -20.24 LEN_BP_RATIO 2.45
GUGUUCUGGCUUCUUGGGAUGAGGCACACACCACAUCCAGAUUCCCUUGGUGUGAGACUUCACUG
UGGAGC
>random_seq_from_cds__NO_5244 RANDOM_LENGTH 65 SEQ_LENGTH 51
  GC_CONTENT 0.529411764705882 BASEPAIR 19 FREE_ENERGY
  -16.80 LEN_BP_RATIO 2.68421052631579
UCUGAAUCUCGUUACCUCCCAGCAGACCAGGAGUAUACUGUUGGCUGUAGGAAUAUGUUGGGC
>random_seq_from_cds__NO_5252 RANDOM_LENGTH 89 SEQ_LENGTH 66
  GC_CONTENT 0.454545454545455 BASEPAIR 21 FREE_ENERGY
  -17.40 LEN_BP_RATIO 3.14285714285714
AACAAACCUACAGAAUAUCAUCUAUAACCCGGGUAUACCCGUUUGUUGGCACCAUUCUGAUCAGC
UGGAUCCUGGAACUUUGAUUGUGA
>random_seq_from_cds__NO_5270 RANDOM_LENGTH 99 SEQ_LENGTH 89
  GC_CONTENT 0.50561797752809 BASEPAIR 26 FREE_ENERGY
  -27.03 LEN_BP_RATIO 3.42307692307692
CCGCAUGCCCUAUAUCUCAGACAAGCACCCUCGACAAACCUUGGAAGUGAUUAACCUUCUGAGAA
AGCACCGGGAGCUAUGUGAUGUGGUGCUAGUUGU
>random_seq_from_cds__NO_5276 RANDOM_LENGTH 80 SEQ_LENGTH 73
  GC_CONTENT 0.493150684931507 BASEPAIR 24 FREE_ENERGY
  -22.70 LEN_BP_RATIO 3.041666666666667
GUGUUCAAUGCAGUGAUGGCCUGGGUCAAAUACAGUAUUCAGGAAAGACGUCCUCAAUACCCCA
```

```
GGGUGCUGCAGCAUG
>random_seq_from_cds__NO_5280 RANDOM_LENGTH 82 SEQ_LENGTH 70
  GC_CONTENT 0.485714285714286 BASEPAIR 27 FREE_ENERGY
  -25.80 LEN_BP_RATIO 2.59259259259259
CAGACCAAUGAAUGGAGAAUGGUGGCUUCAUGAGCAAAGGAGAUGCGGAGUUGGGUCAGUGU
UCUUGAUGAUCUGUUAU
>random_seq_from_cds__NO_5281 RANDOM_LENGTH 110 SEQ_LENGTH 94
  GC_CONTENT 0.5 BASEPAIR 30 FREE_ENERGY -31.10 LEN_BP_RATIO
  3.13333333333333
AUGCAGUAGGAGGCCAUGAUGGAUCCUCUUAUCUCAAUAGUGUUGAAAGGGUAUGACCCCAAAC
AAACCAGUGGAGCAGUGAUGUGGCCCUACAAGCACCUGCAGGAC
>random_seq_from_cds__NO_5294 RANDOM_LENGTH 80 SEQ_LENGTH 65
  GC_CONTENT 0.538461538461538 BASEPAIR 24 FREE_ENERGY
  -24.80 LEN_BP_RATIO 2.70833333333333
GAUGGCCAUGGCAGUCAGUGGCAGCAGAAAGAGGCAGCAGAAGGUGAAGAGGUUAUAGGUGGUCU
CUUGCCAUGAGCCU
>random_seq_from_cds__NO_5296 RANDOM_LENGTH 72 SEQ_LENGTH 60
  GC_CONTENT 0.6 BASEPAIR 20 FREE_ENERGY -20.40 LEN_BP_RATIO
  3
UGCCCCAGAAGUUCCUACACCUGAACGGGAUCCAAGCGGGUUGAGUACUGCUGCCUGGCGGU
CCAAUCC
>random_seq_from_cds__NO_5301 RANDOM_LENGTH 84 SEQ_LENGTH 65
  GC_CONTENT 0.523076923076923 BASEPAIR 25 FREE_ENERGY
  -27.50 LEN_BP_RATIO 2.6
UGCAGCUGUUCUACUUCCUUUUCUCUUGGAGCCCUGGCCGAUCGGGCAUUGAUGAGAACAAGGG
CUGUGUAGAGGGCAAUCUC
>random_seq_from_cds__NO_5307 RANDOM_LENGTH 64 SEQ_LENGTH 58
  GC_CONTENT 0.689655172413793 BASEPAIR 23 FREE_ENERGY
  -27.60 LEN_BP_RATIO 2.52173913043478
GGUGUGCUGCGGAAACUGGGGCGCCGUGAGCUGUCUGGGCCUGUCCAGUUCCTCAAGCCAG
>random_seq_from_cds__NO_5309 RANDOM_LENGTH 85 SEQ_LENGTH 66
  GC_CONTENT 0.636363636363636 BASEPAIR 26 FREE_ENERGY
  -26.60 LEN_BP_RATIO 2.53846153846154
CUCUCUCUGCCCUCAGCCUUGCCCCGCUCAGGGCUGUAUUAAGGUGGCAUGAGGCCCAUUGAG
CCCUGCCUUGGCCAAGUUGU
>random_seq_from_cds__NO_5311 RANDOM_LENGTH 82 SEQ_LENGTH 74
  GC_CONTENT 0.662162162162162 BASEPAIR 28 FREE_ENERGY
  -40.20 LEN_BP_RATIO 2.64285714285714
GGCAGCUGCCCGUCUGGGAGCCCAAGGUGUAGGUGAGGGUAUCUGCUCCUUGGGCCCGUCUGG
AGGGGUCUUGACCACUG
>random_seq_from_cds__NO_5316 RANDOM_LENGTH 90 SEQ_LENGTH 81
  GC_CONTENT 0.62962962962963 BASEPAIR 25 FREE_ENERGY
  -30.42 LEN_BP_RATIO 3.24
UGCAGGUGUGGGUCUUCUUUGCAGCCAGCAGCUCCCCCGUGAGGCUCGGUGCUGUCUCUGUGGGC
```

```
CCUGUCCAUUCUAUUUCCAGCGCCC
>random_seq_from_cds__NO_5322 RANDOM_LENGTH 94 SEQ_LENGTH 77
  GC_CONTENT 0.519480519480519 BASEPAIR 25 FREE_ENERGY
  -16.31 LEN_BP_RATIO 3.08
CUCUGCCCAGCGUCUCUCCGAUCCUGUCUUUGAGAGAAACGAGCUCCUCCUCCUCUUUCUCCUG
UUCUCAAGGUGAGCCUCGAUCAGCGCCUG
>random_seq_from_cds__NO_5332 RANDOM_LENGTH 80 SEQ_LENGTH 65
  GC_CONTENT 0.615384615384615 BASEPAIR 21 FREE_ENERGY
  -23.90 LEN_BP_RATIO 3.0952380952381
ACCUCGAUCAUCUUCUGGUACAUGUCCUCCGCAGGCUGGGCUUCUCCGGGCCUUCGUGAGCUC
CUCUCCAGGUAGGU
>random_seq_from_cds__NO_5334 RANDOM_LENGTH 71 SEQ_LENGTH 58
  GC_CONTENT 0.603448275862069 BASEPAIR 24 FREE_ENERGY
  -21.20 LEN_BP_RATIO 2.41666666666667
UCUGGUUGUAGCGCUCCCCGUCCUACACAUCCCAUGGUAGGCAGGUACGAAGGGCCUCAGC
ACAUCC
>random_seq_from_cds__NO_5335 RANDOM_LENGTH 64 SEQ_LENGTH 53
  GC_CONTENT 0.622641509433962 BASEPAIR 20 FREE_ENERGY
  -20.80 LEN_BP_RATIO 2.65
ACCAUCAGCCGGUCCAGGCAGCGCUGCUCUGACUCACAGUGCUUCUUCAGGAUCCUGCCAUUGG
>random_seq_from_cds__NO_5339 RANDOM_LENGTH 81 SEQ_LENGTH 73
  GC_CONTENT 0.684931506849315 BASEPAIR 29 FREE_ENERGY
  -45.20 LEN_BP_RATIO 2.51724137931034
CCCUGGAGGAGGCCGAGGAAGAGGACAGUUUCCUCAGGGGCAGGUUGCCCCGAGGGCUUCCUG
CGUCUCCUCCAAGGCC
>random_seq_from_cds__NO_5346 RANDOM_LENGTH 71 SEQ_LENGTH 60
  GC_CONTENT 0.633333333333333 BASEPAIR 20 FREE_ENERGY
  -23.20 LEN_BP_RATIO 3
CACAGUCGUCUCCUCUGGCCUUUGCCCACUUCAGGCUCCCAGAGCCCGGAUGCCACAGGGCA
GAUAUC
>random_seq_from_cds__NO_5348 RANDOM_LENGTH 86 SEQ_LENGTH 65
  GC_CONTENT 0.707692307692308 BASEPAIR 27 FREE_ENERGY
  -36.80 LEN_BP_RATIO 2.40740740740741
CUGCCUCUCCACCAGGGCCUCUGGGGGCUGCAGGUCCUCAAGCUCACGGGCUCUCCAGACGGCU
CAGUGAGGGCAAGAUCCUGUG
>random_seq_from_cds__NO_5360 RANDOM_LENGTH 82 SEQ_LENGTH 64
  GC_CONTENT 0.734375 BASEPAIR 25 FREE_ENERGY -31.40
  LEN_BP_RATIO 2.56
GCAGUACACAGCCAUCAUGCAGCGCGCUGGCUCAGCGGUGGCCGCGGGGAAUGUGACAUCAGCG
GCGCCGGGCGCUUGGGG
>random_seq_from_cds__NO_5361 RANDOM_LENGTH 110 SEQ_LENGTH 78
  GC_CONTENT 0.756410256410256 BASEPAIR 31 FREE_ENERGY
  -48.10 LEN_BP_RATIO 2.51612903225806
CUGGAGGAGGCAGCUCGCCUCAGCUGCGCUGUGCACACCUCGCCCGGGGGAGGACGCAGACCCGG
```

---

```
GCAGGCGGCAGGGAUGUCGGCGAAGGAGAGGCCAAAGGGCAAAGU
>random_seq_from_cds__NO_5381 RANDOM_LENGTH 84 SEQ_LENGTH 65
  GC_CONTENT 0.538461538461538 BASEPAIR 20 FREE_ENERGY
  -19.40 LEN_BP_RATIO 3.25
CUCCUGCACUGGCUCCAUCCGCUAUA AAAACCUUGACAGACCAUGAGCCCAGUGGGAUAGUGAGGG
UUGAGGCUCACCCAGAGAA
>random_seq_from_cds__NO_5390 RANDOM_LENGTH 92 SEQ_LENGTH 83
  GC_CONTENT 0.481927710843373 BASEPAIR 27 FREE_ENERGY
  -18.20 LEN_BP_RATIO 3.07407407407407
CUGUGUCCACAGCGUUCAAGGCAAACAGUGAGUUUUUCCAGAUUCUCAGUCAGAAUGGAGCACCU
CAGGCAGAUGUGAGCAUGUACAGUCUU
>random_seq_from_cds__NO_5402 RANDOM_LENGTH 110 SEQ_LENGTH 97
  GC_CONTENT 0.65979381443299 BASEPAIR 33 FREE_ENERGY
  -42.10 LEN_BP_RATIO 2.93939393939394
UGGGGAGCAGCGGGUCG CAGGAGCAGCUUGUCAGCAUCGCCUCCUCCAGUGAGGCCAGUGGGCAC
CGUGUGGAGGAGACGAAGGCGGAGCAGGAUGACCUUGCAGCAGGU
>random_seq_from_cds__NO_5409 RANDOM_LENGTH 73 SEQ_LENGTH 61
  GC_CONTENT 0.639344262295082 BASEPAIR 19 FREE_ENERGY
  -17.94 LEN_BP_RATIO 3.21052631578947
CCAUGUCCACCC CAGAGACAGGCCAGGGAUGCUACCCUCUUCUGUGAGCCUGGACCCUGAAC
AUGCAGCC
>random_seq_from_cds__NO_5415 RANDOM_LENGTH 81 SEQ_LENGTH 63
  GC_CONTENT 0.634920634920635 BASEPAIR 23 FREE_ENERGY
  -29.20 LEN_BP_RATIO 2.73913043478261
CAGCCCCCGGAACUGCACCGGAAGGCCUGCAUGGGCUGCCCUUGUCCGAGGGCUUGCAGCCUAC
CCAGCUUUCUUUUUC
>random_seq_from_cds__NO_5430 RANDOM_LENGTH 71 SEQ_LENGTH 63
  GC_CONTENT 0.714285714285714 BASEPAIR 21 FREE_ENERGY
  -32.80 LEN_BP_RATIO 3
CACCCAGUGAGCCUCCUGCUGCAGGUGCCCAAUGUGGGAGGCGGCUUGGAGGCCUGGCACAUCCG
GGGUUG
>random_seq_from_cds__NO_5437 RANDOM_LENGTH 79 SEQ_LENGTH 69
  GC_CONTENT 0.579710144927536 BASEPAIR 23 FREE_ENERGY
  -19.12 LEN_BP_RATIO 3
GCCCAGAACUUUGGUCUCCAGCAUCUCUCCAGCGGCCACUUCUUGCGGGAGAACAUCAAGGCCAG
CACCGGAAGUUGGU
>random_seq_from_cds__NO_5467 RANDOM_LENGTH 82 SEQ_LENGTH 53
  GC_CONTENT 0.547169811320755 BASEPAIR 19 FREE_ENERGY
  -16.30 LEN_BP_RATIO 2.78947368421053
CCGUCGCUAUAUCCG CAGACUCCGGGCUAUCCGGGAGCUCAAUAGGAACUGUAGAAGAUUUGAAA
AAUAAUGAAAGCCAAUG
>random_seq_from_cds__NO_5469 RANDOM_LENGTH 102 SEQ_LENGTH 82
  GC_CONTENT 0.573170731707317 BASEPAIR 27 FREE_ENERGY
  -24.20 LEN_BP_RATIO 3.03703703703704
```

CUGUGCUGAUGCUGGCCUACUUGACGAGAGCUUCCUGAGAAGAUGUCUGAAUUUUUAUGGCCUUC  
UCAUUCAGCUGCUGCUCCGCAUCCUGGACCCCGCAUA

>random\_seq\_from\_cds\_\_NO\_5479 RANDOM\_LENGTH 90 SEQ\_LENGTH 71  
GC\_CONTENT 0.492957746478873 BASEPAIR 24 FREE\_ENERGY  
-17.60 LEN\_BP\_RATIO 2.95833333333333

AGCAACUUUGUGGCCCAAGUGCCGUGACCUGAAAGUUGAAAACCCUGAGAAUACGGCUUUGAA  
CCAAAGAAGCUGUUGGACCAACUGA

>random\_seq\_from\_cds\_\_NO\_5480 RANDOM\_LENGTH 83 SEQ\_LENGTH 77  
GC\_CONTENT 0.480519480519481 BASEPAIR 24 FREE\_ENERGY  
-20.10 LEN\_BP\_RATIO 3.20833333333333

CGGAUUAUUACUUACAGCUGGACUGUGCUCGGUUCGCGAAAGCCAUUGCUGACGACCAGGAGAU  
CUACAGUAAGGAAUUGUU

>random\_seq\_from\_cds\_\_NO\_5488 RANDOM\_LENGTH 72 SEQ\_LENGTH 65  
GC\_CONTENT 0.676923076923077 BASEPAIR 27 FREE\_ENERGY  
-36.00 LEN\_BP\_RATIO 2.40740740740741

AGGCCUGGGGAUGGCCGAGGGAAUGGGCAGUUGACUGGAAGAUUUAGCAGCUGCUCCUGCGGCC  
GGGGCAG

>random\_seq\_from\_cds\_\_NO\_5491 RANDOM\_LENGTH 110 SEQ\_LENGTH 81  
GC\_CONTENT 0.666666666666667 BASEPAIR 31 FREE\_ENERGY  
-43.27 LEN\_BP\_RATIO 2.61290322580645

GAGGGCCUCUUCCAGAUGUAGCCCGGAGAGCCUGACUGACCCCUCCUAUCAUUACUCCGGAG  
UCGAGGCGUCAGGCUGCUUGGGGAGGGGUGCUCGCGUCAAGA

>random\_seq\_from\_cds\_\_NO\_5498 RANDOM\_LENGTH 84 SEQ\_LENGTH 73  
GC\_CONTENT 0.438356164383562 BASEPAIR 23 FREE\_ENERGY  
-16.30 LEN\_BP\_RATIO 3.17391304347826

GUGCAUUUGCCCAGUAUAACAUGGAUCAGUUCACGCCUGUGAAGAUAGAAGGAUAUGAAGAU  
GGUCUUAUUACAGAGCAC

>random\_seq\_from\_cds\_\_NO\_5518 RANDOM\_LENGTH 69 SEQ\_LENGTH 61  
GC\_CONTENT 0.557377049180328 BASEPAIR 20 FREE\_ENERGY  
-18.51 LEN\_BP\_RATIO 3.05

GCUGAGCAUUUCCUGGGACCAGGAGACAGAGAUGUGCCUAUUCUGCAUUGUCUCCAACCCUG  
UCAG

>random\_seq\_from\_cds\_\_NO\_5519 RANDOM\_LENGTH 83 SEQ\_LENGTH 62  
GC\_CONTENT 0.645161290322581 BASEPAIR 20 FREE\_ENERGY  
-26.40 LEN\_BP\_RATIO 3.1

CUGGGACUUGGCCACAGUCACGCCUGGGAUAGCUGUCAUCAUGAGGCAGGCACCAGGGAAGGCC  
UCCUACAAAGAUGUGCUG

>random\_seq\_from\_cds\_\_NO\_5530 RANDOM\_LENGTH 110 SEQ\_LENGTH 79  
GC\_CONTENT 0.417721518987342 BASEPAIR 26 FREE\_ENERGY  
-19.00 LEN\_BP\_RATIO 3.03846153846154

UAUAUUCUUUAAGAACCAAUUCCAGUCUAAGUCUGGAAUGGUCAAGUUUGCAAGAGUCCCAA  
CAUUCAAUCACAAACUCCUCUUCUUCAUCAUUAAGAGAUCUGGGCU

>random\_seq\_from\_cds\_\_NO\_5535 RANDOM\_LENGTH 85 SEQ\_LENGTH 63  
GC\_CONTENT 0.444444444444444 BASEPAIR 22 FREE\_ENERGY



---

-17.40 LEN\_BP\_RATIO 2.86363636363636

GAAGCAGUCCAACUUGUACCAUCUUAUUCUCAGUCCUGUGUCAAGGAUAGGUUUAGUAAAAGU  
CGGAGGGUGAUUUCAGCAG

>random\_seq\_from\_cds\_\_NO\_5549 RANDOM\_LENGTH 87 SEQ\_LENGTH 60  
GC\_CONTENT 0.65 BASEPAIR 23 FREE\_ENERGY -28.00  
LEN\_BP\_RATIO 2.60869565217391

UUGCAUCUCAUGCUGUGCUCAGCGGUUGGCCACGCGGCCAGGAAGUGCAGGGCAGUGGCGCUU  
UGAUCAUACACAGCAAACAGGA

>random\_seq\_from\_cds\_\_NO\_5553 RANDOM\_LENGTH 109 SEQ\_LENGTH 96  
GC\_CONTENT 0.59375 BASEPAIR 32 FREE\_ENERGY -32.70  
LEN\_BP\_RATIO 3

AGGUCAGAGGCAUAGUGAGGCUGGAUCAGCAGCAGGCAGGCGCUCUCAGUGAAGGGCACUUGAGU  
CACCGAGAAGUUGUCCUGGAUGUCACUCCAGUGCUGGAAGGUGC

>random\_seq\_from\_cds\_\_NO\_5556 RANDOM\_LENGTH 93 SEQ\_LENGTH 78  
GC\_CONTENT 0.551282051282051 BASEPAIR 28 FREE\_ENERGY  
-26.80 LEN\_BP\_RATIO 2.78571428571429

CCAGUCUCCAUCUGUCACAGCCUGCAUGAACCUGUCAAUUCUCAGCAGCAACAUCAGUUC  
UGUGAAGUCCAGAGAGCGUGGGAGGACC

>random\_seq\_from\_cds\_\_NO\_5557 RANDOM\_LENGTH 71 SEQ\_LENGTH 65  
GC\_CONTENT 0.646153846153846 BASEPAIR 22 FREE\_ENERGY  
-27.10 LEN\_BP\_RATIO 2.95454545454545

ACAGGGGUAUAGAGAGCCAGGCCUGCACAAACGGCUGCUUCAGGUGCAGGCCUGGGGUCUGUGAA  
CACGCC

>random\_seq\_from\_cds\_\_NO\_5560 RANDOM\_LENGTH 78 SEQ\_LENGTH 66  
GC\_CONTENT 0.651515151515151 BASEPAIR 21 FREE\_ENERGY  
-24.10 LEN\_BP\_RATIO 3.14285714285714

GCCUGUCAGCUGUGUGGUCCAAGGCUCCAGAUAGAGAGAGGCCAGGGUGCCAAAGACAGCCGUU  
GGGGAGAGGACGG

>random\_seq\_from\_cds\_\_NO\_5578 RANDOM\_LENGTH 89 SEQ\_LENGTH 79  
GC\_CONTENT 0.594936708860759 BASEPAIR 27 FREE\_ENERGY  
-26.20 LEN\_BP\_RATIO 2.92592592592593

GCUCCAGCUUCUGGUCAUGAUUCACCAGCUGUCCACCCUGCGGGACCAGCUCCUGACAGCCCACU  
CGGAGCAGAAGAACAUGGCUGCCA

>random\_seq\_from\_cds\_\_NO\_5588 RANDOM\_LENGTH 77 SEQ\_LENGTH 63  
GC\_CONTENT 0.619047619047619 BASEPAIR 22 FREE\_ENERGY  
-25.60 LEN\_BP\_RATIO 2.86363636363636

UUCCCCGAGUCCCGAAACAGCAGCCACAUCAAGAGGCCCAUGAACGCCUUCAUGGUGGGCCAA  
GGAUGAGCGGAG

>random\_seq\_from\_cds\_\_NO\_5603 RANDOM\_LENGTH 68 SEQ\_LENGTH 58  
GC\_CONTENT 0.620689655172414 BASEPAIR 19 FREE\_ENERGY  
-19.60 LEN\_BP\_RATIO 3.05263157894737

CACUGGCCACCUUCAGAAAUAUGUCCCGUGGUUCCCCGGGGCCCCACAUCUGGGUCUCACAGAU  
GAC

>random\_seq\_from\_cds\_\_NO\_5607 RANDOM\_LENGTH 87 SEQ\_LENGTH 78

---

```
GC_CONTENT    0.641025641025641    BASEPAIR    29    FREE_ENERGY
-29.31    LEN_BP_RATIO    2.68965517241379
CACUGCGCUGGACUCCAAGGUGACACGGCGUCCAUGCCUUCUCGUUGCUC AACCCAGGAGAGG
CCCUGCACCAUGGCCAGCUGCC
>random_seq_from_cds__NO_5612    RANDOM_LENGTH    99    SEQ_LENGTH    79
GC_CONTENT    0.721518987341772    BASEPAIR    32    FREE_ENERGY
-36.40    LEN_BP_RATIO    2.46875
CCUUCGUGCGUUCGCCGUAGGCGGCGAUGACCUGUAGGUCCCGCAAGUGCUGUGUGCGGACGCUC
UGCUGCGCCCAACACGCUCGUCCCGCGCCGGCCC
>random_seq_from_cds__NO_5624    RANDOM_LENGTH    68    SEQ_LENGTH    56
GC_CONTENT    0.535714285714286    BASEPAIR    21    FREE_ENERGY
-22.90    LEN_BP_RATIO    2.666666666666667
CGUCACAGGUUCUGUAGCGCUGACAGCCUCGGCUGGUCGUUUUAUUGGCAUCCAGAAUCUCGGGAA
AGC
>random_seq_from_cds__NO_5625    RANDOM_LENGTH    87    SEQ_LENGTH    65
GC_CONTENT    0.676923076923077    BASEPAIR    27    FREE_ENERGY
-37.00    LEN_BP_RATIO    2.40740740740741
CGGAGGACUGCAGGAGCACCAUGGAGGCUCUCGAGGGCUGCCCUGCAGAGCCUCCUGGUCUGGGU
UCCCACAACAUAUAGGGGCAUGC
>random_seq_from_cds__NO_5627    RANDOM_LENGTH    82    SEQ_LENGTH    76
GC_CONTENT    0.684210526315789    BASEPAIR    28    FREE_ENERGY
-31.40    LEN_BP_RATIO    2.71428571428571
CUCCUGCUGGCCUGGGCCGGGGAGGCCUGAGAGCCAUGGGGUAGCUGUGAAGUAGGCCUGGCCAAG
CAGUGCUGAGUCGGGGA
>random_seq_from_cds__NO_5629    RANDOM_LENGTH    80    SEQ_LENGTH    69
GC_CONTENT    0.710144927536232    BASEPAIR    28    FREE_ENERGY
-39.10    LEN_BP_RATIO    2.46428571428571
GCGCUGGCGGGCCUCGAAGGGGACGUGGGUGGUUCCUGGAAGGCCCGCCGCUCCACUUUGGGGCC
ACUGACAGGCUCCGU
>random_seq_from_cds__NO_5634    RANDOM_LENGTH    90    SEQ_LENGTH    76
GC_CONTENT    0.605263157894737    BASEPAIR    26    FREE_ENERGY
-28.50    LEN_BP_RATIO    2.92307692307692
CGGAGCCUGGUCUUGGAAGAGGAGACCACUUCCUGCUGAAGCUAGCUGAGCGCGUCAAGGCCAC
AUCCAUCUCAGGCACCAGUACAACG
>random_seq_from_cds__NO_5641    RANDOM_LENGTH    85    SEQ_LENGTH    78
GC_CONTENT    0.551282051282051    BASEPAIR    24    FREE_ENERGY
-21.50    LEN_BP_RATIO    3.25
CCUGGGAAGCAGAGAUAGGAGAGUCCGGCUGGUUGCUGAAGAUCGAAGAAUCCAAAACCCACAG
GACAAUGUCUGGAGGCUCCC
>random_seq_from_cds__NO_5648    RANDOM_LENGTH    64    SEQ_LENGTH    51
GC_CONTENT    0.6666666666666667    BASEPAIR    20    FREE_ENERGY
-20.70    LEN_BP_RATIO    2.55
UCCACGGGGACUGGGGCUGGCUCACGUAUCCGGCUC AUGGGGUGGGACUCCAUCAACGAGGUGG
>random_seq_from_cds__NO_5652    RANDOM_LENGTH    84    SEQ_LENGTH    77
```

---

```
GC_CONTENT    0.649350649350649    BASEPAIR    27    FREE_ENERGY
-35.00    LEN_BP_RATIO    2.85185185185185
CACCAUUGCGGCCGACGAGAGCUUCACAGGUGCCGACCUUGGUGUGCGGCGUCUCAAGCUCAACA
CGGAGGUGCGCAGUGUGGG
>random_seq_from_cds__NO_5655    RANDOM_LENGTH    87    SEQ_LENGTH    79
GC_CONTENT    0.708860759493671    BASEPAIR    27    FREE_ENERGY
-27.90    LEN_BP_RATIO    2.92592592592593
GGAGGUGAGGGGCCAGUGCGUGCGGCACUCAGAGGAGCGGGACACACCCAAGAUGUACUGCAGCG
CGGAGGGCGAGUGGCUCGUGCC
>random_seq_from_cds__NO_5681    RANDOM_LENGTH    97    SEQ_LENGTH    64
GC_CONTENT    0.546875    BASEPAIR    22    FREE_ENERGY    -18.90
LEN_BP_RATIO    2.90909090909091
CCCGCCGGCACCUCUGAUCUACUUCUGCAUGUCACACUGCAGCAGCAACACAAUGGAUGGGUCAC
UCUUGGCUGCCUCCUUGAACUCCUCCAAUGUA
>random_seq_from_cds__NO_5688    RANDOM_LENGTH    94    SEQ_LENGTH    76
GC_CONTENT    0.565789473684211    BASEPAIR    23    FREE_ENERGY
-26.10    LEN_BP_RATIO    3.30434782608696
ACCGUGGGUAUGCAGACAGUCCUUCAAAAGGCAGGAGCAGCUCCAUAUGUGCAGGCAUUUGACUC
GCUGCUUGCUGGUCCUGUGGCAGAGUACU
>random_seq_from_cds__NO_5694    RANDOM_LENGTH    110    SEQ_LENGTH    100
GC_CONTENT    0.65    BASEPAIR    30    FREE_ENERGY    -36.40
LEN_BP_RATIO    3.33333333333333
CCUGGAGCAAACGGGGGCCUGUGGCAAAGAACUGAGCGGACUGCCAUCUGGACCCUCUGCCGG
AUCAUGUCCUCCUCCCCUCCACCAUGCCCCCUCCUCCCCCAGU
>random_seq_from_cds__NO_5700    RANDOM_LENGTH    75    SEQ_LENGTH    68
GC_CONTENT    0.470588235294118    BASEPAIR    23    FREE_ENERGY
-16.00    LEN_BP_RATIO    2.95652173913043
UUGGCCUGGUAUUCGAUGACGUGGUGGGCAUUGUGGAGAUAAUCAACAGUAAGGAUGUCAAGUU
CAGGGUAAUG
>random_seq_from_cds__NO_5727    RANDOM_LENGTH    97    SEQ_LENGTH    75
GC_CONTENT    0.56    BASEPAIR    29    FREE_ENERGY    -28.20
LEN_BP_RATIO    2.58620689655172
UCUGCCCCUGCCAAAACAGACUGUGUGCAUCUCCUUUCAGAAGUUAACGGUAUCCCCGGCCUGG
AGCUGUAAAGGGGUCCUUAUGCAGAGCUGG
>random_seq_from_cds__NO_5744    RANDOM_LENGTH    100    SEQ_LENGTH    91
GC_CONTENT    0.450549450549451    BASEPAIR    34    FREE_ENERGY
-26.20    LEN_BP_RATIO    2.67647058823529
UUCCACAAGGGUUUCACUCUAUUAAAUCAGGAAGGCCUUUGUAGAUGUCUUAUCAUUAUUGCUU
UCUUCUGUUGGAAGGGCCCUGAUUCCUGUGGCCA
>random_seq_from_cds__NO_5746    RANDOM_LENGTH    97    SEQ_LENGTH    53
GC_CONTENT    0.509433962264151    BASEPAIR    21    FREE_ENERGY
-26.50    LEN_BP_RATIO    2.52380952380952
AGUUCACUUUUCUCAUUCCAAACGUCUCACAACAGGCCGUGAGAAAUGUCCUUAUGUUCUUCAA
ACAGAGAAACCUGGGACAUCUGCGGCCUCAGG
```

---

```
>random_seq_from_cds__NO_5778 RANDOM_LENGTH 71 SEQ_LENGTH 60
  GC_CONTENT 0.65 BASEPAIR 22 FREE_ENERGY -26.50
  LEN_BP_RATIO 2.72727272727273
UGGUCGGGGUUCAGAUAGAUUCGACCCCGCAUGGCCAGCUCUAUCAGGAUGCCCCUCGCAGG
CCUGAU
>random_seq_from_cds__NO_5780 RANDOM_LENGTH 84 SEQ_LENGTH 63
  GC_CONTENT 0.46031746031746 BASEPAIR 20 FREE_ENERGY
  -20.29 LEN_BP_RATIO 3.15
CCAUAAGAGUAAGGCGGAUAUCCUJAGAGUCUCCAGAAUCUUAUUGUCUGGACUUUCUCCCAA
UUACUGUCUUCUCACUUU
>random_seq_from_cds__NO_5793 RANDOM_LENGTH 79 SEQ_LENGTH 69
  GC_CONTENT 0.550724637681159 BASEPAIR 23 FREE_ENERGY
  -29.70 LEN_BP_RATIO 3
AAUUGGGAGCCAGGUCCUGAUUCCUCUUCAGCAAGGCCUCACUGAAGGAAGUUUCAUCAGGUGCU
GGCUUGACCCGGGG
>random_seq_from_cds__NO_5795 RANDOM_LENGTH 109 SEQ_LENGTH 93
  GC_CONTENT 0.548387096774194 BASEPAIR 32 FREE_ENERGY
  -36.30 LEN_BP_RATIO 2.90625
UCUGUCACCCCUCAUAAUGAGCCUCUUUGAUCUCUCCGGGGCUUUUUCGGCUUUCUGGACCU
CGGAGGCCACAGAGAUCUUUUUUGGAGGGAUGACUCGAGAUG
>random_seq_from_cds__NO_5817 RANDOM_LENGTH 95 SEQ_LENGTH 74
  GC_CONTENT 0.540540540540541 BASEPAIR 26 FREE_ENERGY
  -31.40 LEN_BP_RATIO 2.84615384615385
AUUAUGAAACUGUCCUGUCCUGGGAAUUCUCCAUUCCUAAGCCAGACAUGAUCACCCGUUUGGA
AGGGGAGGAGGAGUCUCAGAAUUCUGACGA
>random_seq_from_cds__NO_5824 RANDOM_LENGTH 81 SEQ_LENGTH 61
  GC_CONTENT 0.540983606557377 BASEPAIR 21 FREE_ENERGY
  -19.30 LEN_BP_RATIO 2.9047619047619
AAGGGUUCAAGGCAAGCUUGGGUUGGUGUCGAAGAAUGAUGAGAAGGUAUGACCUGUCUCUGAGG
CAUAAAGUGCCCGUGC
>random_seq_from_cds__NO_5826 RANDOM_LENGTH 63 SEQ_LENGTH 55
  GC_CONTENT 0.490909090909091 BASEPAIR 19 FREE_ENERGY
  -15.40 LEN_BP_RATIO 2.89473684210526
CGCAUGACUAUGAGGUAGCUCAGAUUGGGGAAUGCAGAUGAGACGCCCAUUUGUUUAGAGGUGC
>random_seq_from_cds__NO_5830 RANDOM_LENGTH 77 SEQ_LENGTH 61
  GC_CONTENT 0.60655737704918 BASEPAIR 20 FREE_ENERGY
  -17.60 LEN_BP_RATIO 3.05
GACUGAAGACUUGAUGCAGGACUGGUUGGAAGUGGUGUGGAGACGGAGGACAGGAGCAGUGCCCA
AGCAGCGAGGGA
>random_seq_from_cds__NO_5847 RANDOM_LENGTH 71 SEQ_LENGTH 59
  GC_CONTENT 0.694915254237288 BASEPAIR 19 FREE_ENERGY
  -22.80 LEN_BP_RATIO 3.10526315789474
CCGGAGGUCUGCUUCUCGGGGACGUGGCUCCCAACUUUGAGGCCAAUACCACCGUCGGCCGCAUC
CGUUUC
```

---

>random\_seq\_from\_cds\_\_NO\_5848 RANDOM\_LENGTH 67 SEQ\_LENGTH 50  
GC\_CONTENT 0.6 BASEPAIR 19 FREE\_ENERGY -18.29 LEN\_BP\_RATIO  
2.63157894736842  
CACGACUUUCUGGGAGACUCGAUGGGGCAUUCUCUUCUCCACCCUCGGGACUUUACCCAGUGU  
GC

>random\_seq\_from\_cds\_\_NO\_5851 RANDOM\_LENGTH 72 SEQ\_LENGTH 49  
GC\_CONTENT 0.489795918367347 BASEPAIR 19 FREE\_ENERGY  
-17.40 LEN\_BP\_RATIO 2.57894736842105  
AGCAGAGAAGGAUGAAAAGGGCAUGCCUGUGACAGCUCGUGUGGGUGUUUGUUUUUGGUCCUGAU  
AAGAAGC

>random\_seq\_from\_cds\_\_NO\_5865 RANDOM\_LENGTH 88 SEQ\_LENGTH 67  
GC\_CONTENT 0.597014925373134 BASEPAIR 22 FREE\_ENERGY  
-24.60 LEN\_BP\_RATIO 3.04545454545455  
GACAGUUA AUGAAUGGGAGCUUCUCCAUGGACGGGACAGGACAAUCCUAUCAGGACUUGAGGGAU  
GGGAGCCCCUAUGGAAUCCCCCA

>random\_seq\_from\_cds\_\_NO\_5866 RANDOM\_LENGTH 87 SEQ\_LENGTH 65  
GC\_CONTENT 0.553846153846154 BASEPAIR 23 FREE\_ENERGY  
-19.90 LEN\_BP\_RATIO 2.82608695652174  
GUCUCCAUCCUCCAUAUCGUCCUGCCAUCCACGCUCUUUGCUCAAUGGGCUGGAUJACACGG  
UGGACAGUAAUUUGGGCAUCAU

>random\_seq\_from\_cds\_\_NO\_5871 RANDOM\_LENGTH 87 SEQ\_LENGTH 79  
GC\_CONTENT 0.455696202531646 BASEPAIR 22 FREE\_ENERGY  
-17.04 LEN\_BP\_RATIO 3.59090909090909  
UAUAUCAUUAGCUUUAAAAGAGAUGAGCACCUUCAAGACAAUGCUGCCUGCCCGGUCCUUCACU  
GCCUGACUCUUGGUGUUGAUAG

>random\_seq\_from\_cds\_\_NO\_5873 RANDOM\_LENGTH 88 SEQ\_LENGTH 69  
GC\_CONTENT 0.550724637681159 BASEPAIR 21 FREE\_ENERGY  
-17.20 LEN\_BP\_RATIO 3.28571428571429  
AUCUUCUUCGUCCACGAACUUGUUCUGUCAUAUUCAUCCACGUCCACCUUCCGGAAGCGGGCCG  
ACGACACUGUGUUCUUCGACAU

>random\_seq\_from\_cds\_\_NO\_5874 RANDOM\_LENGTH 75 SEQ\_LENGTH 66  
GC\_CONTENT 0.636363636363636 BASEPAIR 23 FREE\_ENERGY  
-21.70 LEN\_BP\_RATIO 2.8695652173913  
UCAGUGGGUCGGAGAGGCAUCCUCCAAGCCCAGCAGCUCUCUGACGAGUCUCUCUCCAAACUGCG  
CCCGGCUGUA

>random\_seq\_from\_cds\_\_NO\_5879 RANDOM\_LENGTH 81 SEQ\_LENGTH 67  
GC\_CONTENT 0.626865671641791 BASEPAIR 23 FREE\_ENERGY  
-22.60 LEN\_BP\_RATIO 2.91304347826087  
CAUGGACAGUGGGAGGCCGGUGCAGUCACUCUCCGCGCGGAGCAAGCCGCAGCAGUAAAUCC  
CCUUGCUUCUCAAACU

>random\_seq\_from\_cds\_\_NO\_5889 RANDOM\_LENGTH 68 SEQ\_LENGTH 51  
GC\_CONTENT 0.745098039215686 BASEPAIR 19 FREE\_ENERGY  
-25.20 LEN\_BP\_RATIO 2.68421052631579  
AUGGAUUAUAGGGCGGCCGAGGCGUCGACUCCAUCCACAGCUGUCGCGUGCCUCUGGCCCAAGGAG

CUC

```
>random_seq_from_cds__NO_5926 RANDOM_LENGTH 82 SEQ_LENGTH 68
  GC_CONTENT 0.441176470588235 BASEPAIR 23 FREE_ENERGY
-15.30 LEN_BP_RATIO 2.95652173913043
AGAUUAUCACAGAAACCACUGGUAGAGAGAACACUAUAUGAAGCCUCCUCUGAAGGGAACUCUUCUG
AUGAUUCUGAAGAUGAG
>random_seq_from_cds__NO_5940 RANDOM_LENGTH 77 SEQ_LENGTH 60
  GC_CONTENT 0.433333333333333 BASEPAIR 20 FREE_ENERGY
-15.60 LEN_BP_RATIO 3
CUGUGAUGCAUCCAUCUGGUGAUAGUGACACAACGAUGUUAGAAUCUGAAUGUCAAGCUCCUGUA
CAGAAGGGUAU
>random_seq_from_cds__NO_5948 RANDOM_LENGTH 67 SEQ_LENGTH 57
  GC_CONTENT 0.87719298245614 BASEPAIR 25 FREE_ENERGY
-42.00 LEN_BP_RATIO 2.28
GCCGCGCCGCCGCCGUCGCGCCGCCACGCCGAGGCCAGGCGGCCGCGCGGCAGGG
AA
>random_seq_from_cds__NO_5949 RANDOM_LENGTH 100 SEQ_LENGTH 91
  GC_CONTENT 0.538461538461538 BASEPAIR 26 FREE_ENERGY
-26.60 LEN_BP_RATIO 3.5
CUGGCGCUGAAGACCCUGGGGACAGAUGGCCUUUUUCUCUUUCCUCCUUGGACACUGACGGGGA
UAUGUACAUCAGCCUGAGGAGUCAAACCCAUG
>random_seq_from_cds__NO_5950 RANDOM_LENGTH 84 SEQ_LENGTH 71
  GC_CONTENT 0.549295774647887 BASEPAIR 27 FREE_ENERGY
-25.20 LEN_BP_RATIO 2.62962962962963
CUGAGAAGCUAACAGGGGUCUUGUUCUGUCACCCAGACUGGAGUGCAGUGGUGCAGUCACAGCUC
ACUGCAGCCUCAACUCCCC
>random_seq_from_cds__NO_5978 RANDOM_LENGTH 84 SEQ_LENGTH 62
  GC_CONTENT 0.451612903225806 BASEPAIR 21 FREE_ENERGY
-16.30 LEN_BP_RATIO 2.95238095238095
CACUCUUUGUAACUUGGAAACUCAGGAGCCUUUGGAAAGUACUGCUGCAGUUUGCUCCAAGCCUC
UUUAGAAACAAGCCUUCUU
>random_seq_from_cds__NO_5992 RANDOM_LENGTH 73 SEQ_LENGTH 68
  GC_CONTENT 0.441176470588235 BASEPAIR 26 FREE_ENERGY
-24.60 LEN_BP_RATIO 2.61538461538462
AGCUGCAAGUUCAGAGUGCAAGGAAGGCUAAGAAGUCGAAUCUUUCUUGUUGCAUUCUGUUUGCU
UUGACAGU
>random_seq_from_cds__NO_6016 RANDOM_LENGTH 106 SEQ_LENGTH 70
  GC_CONTENT 0.557142857142857 BASEPAIR 22 FREE_ENERGY
-26.14 LEN_BP_RATIO 3.18181818181818
AUUUUGUAUUUUUCAUCAAUAAAAGAACUUGAGUUUGCCAAUCAUAGGGCGGUAUAUUCUGUGGAG
AUCCUUCAGGGCUGCCCCCAGUGUGAGCUCUGAGGCUUCC
>random_seq_from_cds__NO_6028 RANDOM_LENGTH 81 SEQ_LENGTH 50
  GC_CONTENT 0.62 BASEPAIR 19 FREE_ENERGY -21.40
  LEN_BP_RATIO 2.63157894736842
```

UCCACUGCAGCCCUUCUACCGCUGGAGGACGUGGGUCCCUCCUGGGGGUUGUUAUGAUCCCUGCU  
CUCCAUGAUGUCGUCG

>random\_seq\_from\_cds\_\_NO\_6031 RANDOM\_LENGTH 93 SEQ\_LENGTH 86  
GC\_CONTENT 0.383720930232558 BASEPAIR 33 FREE\_ENERGY  
-23.70 LEN\_BP\_RATIO 2.60606060606061

CUUCAAAUGAACAACAAGAGCUUUUCUGUCAGAAGUUGCAGCAGUGUUGUAUACUGUUUGAUUUC  
AUGGACUCUGUUUCAGACUUGAAGAGCA

>random\_seq\_from\_cds\_\_NO\_6042 RANDOM\_LENGTH 96 SEQ\_LENGTH 78  
GC\_CONTENT 0.320512820512821 BASEPAIR 25 FREE\_ENERGY  
-18.36 LEN\_BP\_RATIO 3.12

UUGUACUUCUGGAAUAACGAAUAUAUUCUAGUUUGAUUGAGGAGAACAUAUGAUAAAAUUCUGCC  
AAUUAUGUUUGCCAGUUUGUACAAAAUUUCC

>random\_seq\_from\_cds\_\_NO\_6050 RANDOM\_LENGTH 110 SEQ\_LENGTH 92  
GC\_CONTENT 0.717391304347826 BASEPAIR 33 FREE\_ENERGY  
-51.90 LEN\_BP\_RATIO 2.78787878787879

UGCCCAUGGGGGCCCUUGCCUGGGUACCCAGGGGGCCAGGAGGUCCUGGAGGACCCAUCAU  
GCCACCGCACCCAGGGCUUCCCGCUUGGCACUCACGGCGACCUC

>random\_seq\_from\_cds\_\_NO\_6059 RANDOM\_LENGTH 79 SEQ\_LENGTH 54  
GC\_CONTENT 0.722222222222222 BASEPAIR 19 FREE\_ENERGY  
-25.60 LEN\_BP\_RATIO 2.84210526315789

UCCCAUCCUUGCCGUUGAUGCCUGGGGGGCCCGUUGCUCUUUCGGGCCUGUGAUCCCUUGGGG  
UCCACGAAUACCG

>random\_seq\_from\_cds\_\_NO\_6062 RANDOM\_LENGTH 70 SEQ\_LENGTH 51  
GC\_CONTENT 0.686274509803922 BASEPAIR 20 FREE\_ENERGY  
-29.90 LEN\_BP\_RATIO 2.55

CCCCGGUGGUCCAGGAUGCCUUGCUCUCCAGAGGCACCCACAUCUCCCUUGGGACCCCGGCUUC  
CCUG

>random\_seq\_from\_cds\_\_NO\_6065 RANDOM\_LENGTH 78 SEQ\_LENGTH 72  
GC\_CONTENT 0.666666666666667 BASEPAIR 24 FREE\_ENERGY  
-36.90 LEN\_BP\_RATIO 3

UGGGGGCCCCGAUGGUCCAUCUGGUCCAGGGUCCCCCUUGGGGCCUCGGAUCCAAUCUCACCA  
GGGAGGCCAACAG

>random\_seq\_from\_cds\_\_NO\_6070 RANDOM\_LENGTH 82 SEQ\_LENGTH 63  
GC\_CONTENT 0.666666666666667 BASEPAIR 21 FREE\_ENERGY  
-28.50 LEN\_BP\_RATIO 3

UCCCGGUGGACCUCUCAAUCUGCGCCAGAGCGAGCACUACCACCUGGAGGAGAACAAGGAGGCUG  
CGGGGGGAGGCCGUAGC

>random\_seq\_from\_cds\_\_NO\_6076 RANDOM\_LENGTH 84 SEQ\_LENGTH 64  
GC\_CONTENT 0.4375 BASEPAIR 20 FREE\_ENERGY -18.40  
LEN\_BP\_RATIO 3.2

AGAUGUGAAACCUGGCUUCAACAUCAGCAUUCUGAAAAUAUUAUCACCAUGAUGUCUGAGAGU  
GUUCGGAUGAUGCUGGAAC

>random\_seq\_from\_cds\_\_NO\_6078 RANDOM\_LENGTH 88 SEQ\_LENGTH 58  
GC\_CONTENT 0.586206896551724 BASEPAIR 19 FREE\_ENERGY

---

-20.60 LEN\_BP\_RATIO 3.05263157894737  
AAGUGUGCCUUCAGCCACCAGGGCAGCAUCCAGUUGGACAGGUACCCUGGACUCAUACCUGAAAAG  
CAGUGUUCAACCUUAGCAAAAUC  
>random\_seq\_from\_cds\_\_NO\_6099 RANDOM\_LENGTH 75 SEQ\_LENGTH 59  
GC\_CONTENT 0.559322033898305 BASEPAIR 23 FREE\_ENERGY  
-32.10 LEN\_BP\_RATIO 2.56521739130435  
GCCAGAGGCUGGAAUGUGGACAGUGAAGGACCUCAAGCAGUGGAAGGCACUCUGUUCGCAUUACU  
GGCCUCAGUA  
>random\_seq\_from\_cds\_\_NO\_6108 RANDOM\_LENGTH 70 SEQ\_LENGTH 61  
GC\_CONTENT 0.475409836065574 BASEPAIR 22 FREE\_ENERGY  
-15.10 LEN\_BP\_RATIO 2.77272727272727  
AAUGUUACAGUCACUCCUGGAGAGAGAGCAGUUUUAACAUGUCUCAUCAUCAGUGCGGUGGAUUA  
CAAUC  
>random\_seq\_from\_cds\_\_NO\_6149 RANDOM\_LENGTH 84 SEQ\_LENGTH 67  
GC\_CONTENT 0.432835820895522 BASEPAIR 22 FREE\_ENERGY  
-16.90 LEN\_BP\_RATIO 3.04545454545455  
GAGAAAAGGAAAUCAAUAUGAAGUUGAUGUCUUGGGUGCCACCAGCUAUAAGAAGGAGGAGAUGA  
AACAUUCUACUUCUUGUG  
>random\_seq\_from\_cds\_\_NO\_6155 RANDOM\_LENGTH 86 SEQ\_LENGTH 62  
GC\_CONTENT 0.516129032258065 BASEPAIR 22 FREE\_ENERGY  
-18.00 LEN\_BP\_RATIO 2.81818181818182  
AUGGAACCACCUAGUCUGGAAGAUGCUGGAAAAAUGCUGAAUGAGACUGUGUUGGUGAGCAACCC  
UGUACAGCUGGAGUGUAAGGC  
>random\_seq\_from\_cds\_\_NO\_6170 RANDOM\_LENGTH 87 SEQ\_LENGTH 78  
GC\_CONTENT 0.423076923076923 BASEPAIR 26 FREE\_ENERGY  
-18.40 LEN\_BP\_RATIO 3  
UCAUGUAUCUGACACAGGCCGUUAUGUGUGUGUUGCUGUGAAUGUAGCAGGAAUGACUGACAAAA  
AAUAUGACUUAAGUGUCCAUGG  
>random\_seq\_from\_cds\_\_NO\_6173 RANDOM\_LENGTH 84 SEQ\_LENGTH 56  
GC\_CONTENT 0.482142857142857 BASEPAIR 22 FREE\_ENERGY  
-18.90 LEN\_BP\_RATIO 2.54545454545455  
CUACGGCUGAUGCAGACCACAAUGGAAGAUGCUGGCCAAUAUACUUGCGUUGUAAGGAAUGCAGC  
UGGUGAAGAAAGAAAAAUC  
>random\_seq\_from\_cds\_\_NO\_6177 RANDOM\_LENGTH 96 SEQ\_LENGTH 77  
GC\_CONTENT 0.532467532467532 BASEPAIR 27 FREE\_ENERGY  
-22.40 LEN\_BP\_RATIO 2.85185185185185  
UGGCUUCCAGUCCAGCUGGCCACAAGAGCAGGAGCUUCAGUCUUAUGUAUUUGGUAUCUCCUAC  
AAUUGCUGGUGUAGGUAGUGAUGGCAACCCU  
>random\_seq\_from\_cds\_\_NO\_6192 RANDOM\_LENGTH 110 SEQ\_LENGTH 82  
GC\_CONTENT 0.48780487804878 BASEPAIR 29 FREE\_ENERGY  
-26.20 LEN\_BP\_RATIO 2.82758620689655  
UGGUGAACAAUUUCAUCUCUUGACCUGUGAGGUCUCUGGUUUUCCACCUCUGACCUCAGCUGG  
CUCAAGAAUGAACAGCCCAUCAAAACUGAACACAAAUAUCUCAUU  
>random\_seq\_from\_cds\_\_NO\_6209 RANDOM\_LENGTH 80 SEQ\_LENGTH 60



---

```
GC_CONTENT    0.65    BASEPAIR    22    FREE_ENERGY    -32.00
LEN_BP_RATIO  2.72727272727273
UACUGAUGGAACCCAGCUCCAGUAUGGCCUGGCUUAGAGAUGGCCAGCCUCUGGGGCUUGAUG
CCCAUCUGACAGUCA
>random_seq_from_cds__NO_6215    RANDOM_LENGTH 66    SEQ_LENGTH    55
GC_CONTENT    0.490909090909091    BASEPAIR    20    FREE_ENERGY
-17.60    LEN_BP_RATIO  2.75
AACUGAUGAGCCCCGGGAUAUCACUGUGUUACGGAACAGACAAGUGACAUUGGAAUGCAAGUCAG
A
>random_seq_from_cds__NO_6218    RANDOM_LENGTH 82    SEQ_LENGTH    64
GC_CONTENT    0.453125    BASEPAIR    19    FREE_ENERGY    -17.99
LEN_BP_RATIO  3.36842105263158
CUACAAGAGAAUUUAUUCUCACUGUAAAUGGUUCCUCCAAACAUAAGGGGGGCCCCCAGAGCCU
UGUAAUUCUUUAAAUA
>random_seq_from_cds__NO_6230    RANDOM_LENGTH 67    SEQ_LENGTH    48
GC_CONTENT    0.583333333333333    BASEPAIR    19    FREE_ENERGY
-21.80    LEN_BP_RATIO  2.52631578947368
CAUGCAGUUCUCCUAGUGGGCGGCUUACAGAUCUCCAGAGCUGUCCGAGAGGAUGCUGGCACUUA
CA
>random_seq_from_cds__NO_6231    RANDOM_LENGTH 90    SEQ_LENGTH    70
GC_CONTENT    0.585714285714286    BASEPAIR    24    FREE_ENERGY
-28.44    LEN_BP_RATIO  2.91666666666667
UGUGUGUGGCCAGAACCCGGCUGGUACAGCCUUGGGCAAAAUCAAGUAAAUGUCCAAGGUUCC
UCCAGUCAUUAGCCCUCAUCUAAAG
>random_seq_from_cds__NO_6232    RANDOM_LENGTH 84    SEQ_LENGTH    75
GC_CONTENT    0.493333333333333    BASEPAIR    28    FREE_ENERGY
-18.10    LEN_BP_RATIO  2.67857142857143
GAAUAUGUUUAUUGCUGUGGACAAGCCCAUCACGUUAUCCUGUGAAGCAGAUGGCCUCCCUCCGCC
UGACAUAUACAUGGCAUAAA
>random_seq_from_cds__NO_6237    RANDOM_LENGTH 87    SEQ_LENGTH    74
GC_CONTENT    0.527027027027027    BASEPAIR    25    FREE_ENERGY
-26.30    LEN_BP_RATIO  2.96
AUGUUGUGGGCUGGAGGAUUCUGGCUUCUAUACCUGUGUUGCUAACAAUGCUGCAGGUGAAGAUAC
ACACACUGUCAGCCUGACUGUG
>random_seq_from_cds__NO_6249    RANDOM_LENGTH 85    SEQ_LENGTH    62
GC_CONTENT    0.580645161290323    BASEPAIR    24    FREE_ENERGY
-25.10    LEN_BP_RATIO  2.58333333333333
AGCCUUGUCCAGGUGGAUGGUAGCUGGUCGGAAUGGAGUCUUUGGGAAGAAUGCACAAGGAGCUG
UGGACGCGGCAACCAAACCA
>random_seq_from_cds__NO_6262    RANDOM_LENGTH 90    SEQ_LENGTH    85
GC_CONTENT    0.376470588235294    BASEPAIR    28    FREE_ENERGY
-16.42    LEN_BP_RATIO  3.03571428571429
GGUUCAGCAAUGAGAAAGAUAGUUUCUAUUCUAAAUCCCAUUUAUUGGACAACAGCAAAGGAAAU
AGGAGAAGCAGUCAUUGGCUUACC
```

---

```
>random_seq_from_cds__NO_6277 RANDOM_LENGTH 84 SEQ_LENGTH 65
  GC_CONTENT 0.507692307692308 BASEPAIR 24 FREE_ENERGY
  -20.40 LEN_BP_RATIO 2.708333333333333
CUUCAAGUGUAUCUGUCCACCAGGACAACAUUUUUAUAGGGGACGGGAAAUCUUGCGCUGGAUUGG
AGAGGCUGCCAAAUUAUGG
>random_seq_from_cds__NO_6283 RANDOM_LENGTH 67 SEQ_LENGTH 53
  GC_CONTENT 0.528301886792453 BASEPAIR 19 FREE_ENERGY
  -15.30 LEN_BP_RATIO 2.78947368421053
GGGUUCUGCCUCAAGAACUGUCCACCCAAUGAUUUGGAAUGUGCCUUGAGCCCAUAUGCCUUGG
AA
>random_seq_from_cds__NO_6284 RANDOM_LENGTH 84 SEQ_LENGTH 72
  GC_CONTENT 0.5 BASEPAIR 22 FREE_ENERGY -17.80 LEN_BP_RATIO
  3.27272727272727
UACAAACUCGUCUCCCUCCCAUUGGAAUAGCCACCAAUCAAGAUUUAAUCCGGCUGGUUGCAUA
CACACAGGAUGGAGUGAUG
>random_seq_from_cds__NO_6285 RANDOM_LENGTH 88 SEQ_LENGTH 76
  GC_CONTENT 0.473684210526316 BASEPAIR 28 FREE_ENERGY
  -31.60 LEN_BP_RATIO 2.71428571428571
CAUCCAGGACAACUUUCCUCAUGGUAGAUGAGGAACAGACUGUCCUUUUGCCUUGAGGGAUGA
AAACCUGAAAGGAGUGGUGUAUA
>random_seq_from_cds__NO_6295 RANDOM_LENGTH 79 SEQ_LENGTH 67
  GC_CONTENT 0.626865671641791 BASEPAIR 24 FREE_ENERGY
  -28.70 LEN_BP_RATIO 2.791666666666667
CUGUGGGCUGCUCCAGGUCUGAGGUCUCAGGGGCUGGGCUCUUGGCUUCAUCCUUGGGACACACA
AGGGACUCCAGCAG
>random_seq_from_cds__NO_6301 RANDOM_LENGTH 74 SEQ_LENGTH 66
  GC_CONTENT 0.621212121212121 BASEPAIR 22 FREE_ENERGY
  -28.20 LEN_BP_RATIO 3
CCCAUAGGAGGGAGGCCAGCUGUCCGGAGUGGCUUGAGGGGCAUAGGAGGAAGGCUGGACCUUA
GAGAUGGCC
>random_seq_from_cds__NO_6311 RANDOM_LENGTH 87 SEQ_LENGTH 75
  GC_CONTENT 0.64 BASEPAIR 28 FREE_ENERGY -37.40
  LEN_BP_RATIO 2.67857142857143
GGGUAGCUGUGCUGCAGAGAGCUGAACCUGUCAGUCAUCUUGGUGGCUGACCGGCCUCCGCACU
GACAGCGGUGACCCUGGCAUAG
>random_seq_from_cds__NO_6315 RANDOM_LENGTH 67 SEQ_LENGTH 59
  GC_CONTENT 0.711864406779661 BASEPAIR 22 FREE_ENERGY
  -25.90 LEN_BP_RATIO 2.68181818181818
CCGUCAGCUCCAGGCGGUCCUGGUGGCCGUCGCCACUCGUCGUCGUCGUCGUCGUCGUCUCCUGGGU
CC
>random_seq_from_cds__NO_6320 RANDOM_LENGTH 86 SEQ_LENGTH 81
  GC_CONTENT 0.679012345679012 BASEPAIR 27 FREE_ENERGY
  -32.42 LEN_BP_RATIO 3
CUGUCUUUGCCCAGAGCAUCCCGUGGAACCUGGAGCGGAUUAACCCUCCACGGUACCGGGCGGAU
```

```
GAAUACCAGCCCCCGGACGG
>random_seq_from_cds__NO_6322 RANDOM_LENGTH 83 SEQ_LENGTH 78
  GC_CONTENT 0.602564102564103 BASEPAIR 28 FREE_ENERGY
  -26.50 LEN_BP_RATIO 2.78571428571429
CAUGGUCACCGACUUCGAGAAUGUGCCCGAGGAGGACGGGACCCGCUUCCACAGACAGGGCCAGC
AAGUGUGACAGUCAUGGC
>random_seq_from_cds__NO_6356 RANDOM_LENGTH 84 SEQ_LENGTH 66
  GC_CONTENT 0.651515151515151 BASEPAIR 22 FREE_ENERGY
  -24.20 LEN_BP_RATIO 3
GCCCAUGCUGACAGCCUCACCCAGGAUGCUGCUCCUUCUUCUCCUCGAAGCCUCCAGGCCUGG
GCACAGAGACACCGCUGUC
>random_seq_from_cds__NO_6372 RANDOM_LENGTH 70 SEQ_LENGTH 62
  GC_CONTENT 0.645161290322581 BASEPAIR 21 FREE_ENERGY
  -25.50 LEN_BP_RATIO 2.95238095238095
AAGCCCUAGGAGGGGAAGGCUGGGAGAAGCUAUCAUUGGUGCCCUCCUCUGCCC GCCUGCAUUAU
GGCAC
>random_seq_from_cds__NO_6394 RANDOM_LENGTH 86 SEQ_LENGTH 67
  GC_CONTENT 0.388059701492537 BASEPAIR 26 FREE_ENERGY
  -16.90 LEN_BP_RATIO 2.57692307692308
UUCCCGGUUGAUCGUGGAUUAUUUGAGGGAUAAAGUAGCCAAUUAUUUGGUGCAGCUCAAUGUCU
UUCUGAAGAUUAAGGAUUAUU
>random_seq_from_cds__NO_6405 RANDOM_LENGTH 73 SEQ_LENGTH 60
  GC_CONTENT 0.616666666666667 BASEPAIR 19 FREE_ENERGY
  -24.20 LEN_BP_RATIO 3.15789473684211
GUGGGAAGGAGCACUCCCCUCACAGUAAUAGGCCGAGUAGCCUUGGGGAGCGAUGACCCAGUCC
CAGCCAGC
>random_seq_from_cds__NO_6410 RANDOM_LENGTH 110 SEQ_LENGTH 92
  GC_CONTENT 0.608695652173913 BASEPAIR 27 FREE_ENERGY
  -30.34 LEN_BP_RATIO 3.40740740740741
GUGACAUC CAGCACCAGCCAGCCUCGUCUCCAGCUCGGAGCGUCUGAAGAUC CAAAAAGAACAA
GUCAGACUCCCCUGUUGGACUGCUCCUGGACCACCU GGAACAUGC
>random_seq_from_cds__NO_6415 RANDOM_LENGTH 84 SEQ_LENGTH 76
  GC_CONTENT 0.789473684210526 BASEPAIR 27 FREE_ENERGY
  -40.70 LEN_BP_RATIO 2.81481481481481
CGAGCACCGCCAGGAUCUCGCGCUGCAGUCCCGGCGCUCGCGCGCGCCAGACGUCGUGGGGA
CAGCCGGGCGGGGUCGCA
>random_seq_from_cds__NO_6437 RANDOM_LENGTH 97 SEQ_LENGTH 76
  GC_CONTENT 0.565789473684211 BASEPAIR 28 FREE_ENERGY
  -29.00 LEN_BP_RATIO 2.71428571428571
AUGUUGACUAUAUAUCCUGUUGAAACGUGGCUUCCUCCAGUCCUGAUCGACGGAACUCUGCGAGG
AUGGCUCUCAGGAAGCUCUGUCCAGAACAGA
>random_seq_from_cds__NO_6444 RANDOM_LENGTH 77 SEQ_LENGTH 60
  GC_CONTENT 0.533333333333333 BASEPAIR 21 FREE_ENERGY
  -16.41 LEN_BP_RATIO 2.85714285714286
```

UUUGGCCUGUUAGCUUCCUGCAAGAUUUGCACAUAGACUUGGUGGGGCUCGUCAGCUUCAUGCC  
AUUGACCUCAAU

>random\_seq\_from\_cds\_\_NO\_6451 RANDOM\_LENGTH 110 SEQ\_LENGTH 91  
GC\_CONTENT 0.516483516483517 BASEPAIR 29 FREE\_ENERGY  
-29.60 LEN\_BP\_RATIO 3.13793103448276

CUUUUACUAUUACCUAGAAACCCGAAGCUGCUGCCUAAUCCGAUUCAUAGUCAAGACAGAACUCU  
UUCUGCGGAUACGAUGGGGAGUAGAGGUCGCUUCAUUCUGGGCUU

>random\_seq\_from\_cds\_\_NO\_6454 RANDOM\_LENGTH 72 SEQ\_LENGTH 62  
GC\_CONTENT 0.483870967741936 BASEPAIR 23 FREE\_ENERGY  
-20.00 LEN\_BP\_RATIO 2.69565217391304

UGAAGCCUUCUUGUCAUCCUCAGUAUAAGAGAGUCCAGUCUCUCUGGUUUUCUCUGGGGCUUUA  
GAGCUGG

>random\_seq\_from\_cds\_\_NO\_6457 RANDOM\_LENGTH 81 SEQ\_LENGTH 70  
GC\_CONTENT 0.571428571428571 BASEPAIR 24 FREE\_ENERGY  
-28.90 LEN\_BP\_RATIO 2.91666666666667

GGAGGCGGAGUGCCUUGAUUCAAUCCUUUUGGCCACAUGUUCUGCUGGGGUCCAAGAAGGGCUCU  
CUGCACUCUUACUCUU

>random\_seq\_from\_cds\_\_NO\_6458 RANDOM\_LENGTH 87 SEQ\_LENGTH 63  
GC\_CONTENT 0.555555555555556 BASEPAIR 20 FREE\_ENERGY  
-20.00 LEN\_BP\_RATIO 3.15

GGCUCUCACGGGUUUCUGGCACUUGGCUGCACUCUCUUGUGGUUUUAUUAACUCCGCAAUAGUU  
CUGAGGAAAGUGGCCUGAAUUU

>random\_seq\_from\_cds\_\_NO\_6468 RANDOM\_LENGTH 85 SEQ\_LENGTH 71  
GC\_CONTENT 0.647887323943662 BASEPAIR 23 FREE\_ENERGY  
-18.90 LEN\_BP\_RATIO 3.08695652173913

GGCCCGUUCGAGGAAUUGUAAUAGCUCCCCAGGAAGACCAGGAUCCAGAAGCCGUUGCCCGCGG  
ACAGCUCGCCCUUCUCCUUC

>random\_seq\_from\_cds\_\_NO\_6469 RANDOM\_LENGTH 85 SEQ\_LENGTH 53  
GC\_CONTENT 0.716981132075472 BASEPAIR 21 FREE\_ENERGY  
-26.70 LEN\_BP\_RATIO 2.52380952380952

CUGUUCACGUUCUCCUGCACACCCCCAGGGCCAGCUGGUGCGGUCCCCAACCUCCACCUCCCA  
GUAGUGGCGGCCUGAGGUGA

>random\_seq\_from\_cds\_\_NO\_6477 RANDOM\_LENGTH 77 SEQ\_LENGTH 72  
GC\_CONTENT 0.75 BASEPAIR 23 FREE\_ENERGY -32.40  
LEN\_BP\_RATIO 3.1304347826087

GCUCCCAGAGCGCUCGCAGGCCGCACACAGGAGGCGCAGCUCGUCGCCACAGAAGGCGGCCAGU  
GGCUCGCGGUGC

>random\_seq\_from\_cds\_\_NO\_6495 RANDOM\_LENGTH 83 SEQ\_LENGTH 72  
GC\_CONTENT 0.625 BASEPAIR 22 FREE\_ENERGY -25.90  
LEN\_BP\_RATIO 3.27272727272727

CUGAGGAGCUCAUCUACCCAGACCGCAGGCUGGAGACCAAGUAUCCGGUGUGUCCGAUGGCAAG  
AGGUUCCUGGGCUCUGGA

>random\_seq\_from\_cds\_\_NO\_6500 RANDOM\_LENGTH 86 SEQ\_LENGTH 78  
GC\_CONTENT 0.615384615384615 BASEPAIR 28 FREE\_ENERGY

---

-24.70 LEN\_BP\_RATIO 2.78571428571429  
GGCAUUGGGGAUGAAGCUCUGCCCACGGUCCUGGUCGGCGUGUUAUCGAACAGCCCACGCCGU  
UUGUGUCCUGUUCUCCAGC  
>random\_seq\_from\_cds\_\_NO\_6507 RANDOM\_LENGTH 72 SEQ\_LENGTH 58  
GC\_CONTENT 0.655172413793103 BASEPAIR 20 FREE\_ENERGY  
-20.40 LEN\_BP\_RATIO 2.9  
CCCUGCGGGGUGAGCUGCAGUCCUCAGAUCUCUCCACCACAGCAAGCUGGACCCCGACAUGGCC  
UUCUGUG  
>random\_seq\_from\_cds\_\_NO\_6518 RANDOM\_LENGTH 83 SEQ\_LENGTH 59  
GC\_CONTENT 0.457627118644068 BASEPAIR 21 FREE\_ENERGY  
-23.12 LEN\_BP\_RATIO 2.80952380952381  
AGUGACCUGGAUUAUUCUGUUGUAGCCCAGCAGGAAUAUGGGCACCUCUUGCUGUAGCGACAACA  
GUAAAACUGCCACUCCCG  
>random\_seq\_from\_cds\_\_NO\_6519 RANDOM\_LENGTH 110 SEQ\_LENGTH 81  
GC\_CONTENT 0.592592592592593 BASEPAIR 27 FREE\_ENERGY  
-25.10 LEN\_BP\_RATIO 3  
AUCCAGCACUGACUCGAAGUAGCGGCUCUGGAAUCCUGCCACCAGCCCAUUGUUGGAGCACGUCU  
GGUACCCAUUCCAUGCCAGCCCUGUUGAUCUCCUCCACCAGCAC  
>random\_seq\_from\_cds\_\_NO\_6520 RANDOM\_LENGTH 81 SEQ\_LENGTH 75  
GC\_CONTENT 0.573333333333333 BASEPAIR 24 FREE\_ENERGY  
-22.80 LEN\_BP\_RATIO 3.125  
UCCGUGGGUUCCCCAGGCUCUGUGGCGUGGGCAUGCAGGCGUAGUCCAUUGUCUGUCAGAACC  
UCCUUCUUGCUGAAG  
>random\_seq\_from\_cds\_\_NO\_6531 RANDOM\_LENGTH 68 SEQ\_LENGTH 48  
GC\_CONTENT 0.458333333333333 BASEPAIR 19 FREE\_ENERGY  
-17.40 LEN\_BP\_RATIO 2.52631578947368  
UUUUAAUUGGUGACGGAGCUGGUUCAAAGUUGCAAUGGGAGCUUUUGAUAAAACCAGACCUGUA  
GGU  
>random\_seq\_from\_cds\_\_NO\_6540 RANDOM\_LENGTH 81 SEQ\_LENGTH 63  
GC\_CONTENT 0.666666666666667 BASEPAIR 24 FREE\_ENERGY  
-28.80 LEN\_BP\_RATIO 2.625  
CUGCUGCACACGGAUGGUCCUUGGCCAGCUCCUGGCCACUACAUUGCCAUCAUGGGCUGCCG  
CCCGCCAUCAGUGUUC  
>random\_seq\_from\_cds\_\_NO\_6541 RANDOM\_LENGTH 87 SEQ\_LENGTH 77  
GC\_CONTENT 0.688311688311688 BASEPAIR 20 FREE\_ENERGY  
-31.70 LEN\_BP\_RATIO 3.85  
UUACCUGGUAGGCUCCACAUGGCCGAGUUUCUGCAGACUGGUGGUGACCCUGAGUGGCUGCUGG  
GCCUCCACCGGGCCCCCGAGAA  
>random\_seq\_from\_cds\_\_NO\_6543 RANDOM\_LENGTH 75 SEQ\_LENGTH 62  
GC\_CONTENT 0.661290322580645 BASEPAIR 24 FREE\_ENERGY  
-26.90 LEN\_BP\_RATIO 2.583333333333333  
CAGGGCCUUGCUGAAGACCGGCGAGCACACUUGGUCCUGGCCGAGCUCAUUCAGGCUCUGGUCC  
UGCUCACCCA  
>random\_seq\_from\_cds\_\_NO\_6548 RANDOM\_LENGTH 67 SEQ\_LENGTH 53

---

```
GC_CONTENT    0.584905660377358    BASEPAIR    20    FREE_ENERGY
-17.80    LEN_BP_RATIO    2.65
UCGGAUAUGAGGACUUCACUCGGAGAGGGGCUCAGGCACCCCUACCUUCCGGGCCAGGGAUUA
UA
>random_seq_from_cds__NO_6549    RANDOM_LENGTH    89    SEQ_LENGTH    80
GC_CONTENT    0.6    BASEPAIR    32    FREE_ENERGY    -39.30    LEN_BP_RATIO
2.5
CCUGGGAAGACCAUGGCUACUCGCUGAUCCAGCGGCUUUACCCUGAGGGUGGGCAGCUGCUGGAU
GAGAAGUUCAGGCAGCCUAUAGC
>random_seq_from_cds__NO_6557    RANDOM_LENGTH    87    SEQ_LENGTH    51
GC_CONTENT    0.529411764705882    BASEPAIR    19    FREE_ENERGY
-17.20    LEN_BP_RATIO    2.68421052631579
CUUGACAGAUUCUGAUCUCCCGUAUGGCCGUGUGGUAUCUCUCCAGCUUCUCUCCCAACUUCACU
GUGUUGUCUGGGAGCUUCAUGC
>random_seq_from_cds__NO_6558    RANDOM_LENGTH    110    SEQ_LENGTH    103
GC_CONTENT    0.553398058252427    BASEPAIR    38    FREE_ENERGY
-40.80    LEN_BP_RATIO    2.71052631578947
UGGCACCUGCGAGUUAGGGUUGUUUCCGAGUUUUCUUUCUUGGGUUUCAUCCCGAAAGGAGAUGG
UCCUGGGGCGUGGAGCGUUUGAGGGAGCUGCUGUAGGUUCGCUGUG
>random_seq_from_cds__NO_6559    RANDOM_LENGTH    109    SEQ_LENGTH    92
GC_CONTENT    0.66304347826087    BASEPAIR    28    FREE_ENERGY
-39.65    LEN_BP_RATIO    3.28571428571429
UGGGUGAGGACAUUUCUGCCUCUCCUCCUUGCUGGGGAUUUCACCCUGGAGUGUGACGGGUGG
GAGGCGGGAGGCCACAGUCGGAGGGUCUGAAGCCCCCUGCUUUG
>random_seq_from_cds__NO_6568    RANDOM_LENGTH    90    SEQ_LENGTH    78
GC_CONTENT    0.628205128205128    BASEPAIR    28    FREE_ENERGY
-38.10    LEN_BP_RATIO    2.78571428571429
CUGCCUCCGCUCUGCCGUGUUCUGAGGAUGCUCUGGAUGUCCUCGUCCUCAUCUUUGGAGGCUG
GGGCAGUGGCUUGGGCACCUCUGC
>random_seq_from_cds__NO_6569    RANDOM_LENGTH    90    SEQ_LENGTH    85
GC_CONTENT    0.611764705882353    BASEPAIR    31    FREE_ENERGY
-35.10    LEN_BP_RATIO    2.74193548387097
UUUUUCCACGCUCGGUAGUCCUCUCAGAAGCAGAGGCCUGCCGGUCUCCAUCUGGCUGAGCCUG
GGAGCCUCAUCGUCCGUGGUGGAGC
>random_seq_from_cds__NO_6571    RANDOM_LENGTH    88    SEQ_LENGTH    75
GC_CONTENT    0.6133333333333333    BASEPAIR    28    FREE_ENERGY
-33.00    LEN_BP_RATIO    2.67857142857143
CCUGCUGACAGCCAUAUGGCGGCGGAUUUGAAGCCUCGGGAGCCUAGCAGCAGUGGCGACUG
CUAUGCCGGCUGAGCAUGUGGCC
>random_seq_from_cds__NO_6576    RANDOM_LENGTH    86    SEQ_LENGTH    74
GC_CONTENT    0.378378378378378    BASEPAIR    22    FREE_ENERGY
-18.55    LEN_BP_RATIO    3.36363636363636
GAUCUUGGCUCUACAAGAGAAAUUGCUGUACAGAUACAUCUGUUAUUACAGCCAUUGGAAUAA
AAAUGGAAGGCUUAGAGUGUC
```

---

```
>random_seq_from_cds__NO_6595 RANDOM_LENGTH 81 SEQ_LENGTH 70
  GC_CONTENT 0.428571428571429 BASEPAIR 25 FREE_ENERGY
-18.80 LEN_BP_RATIO 2.8
UGGAUGAUCGUAUUUCUUUGGAACAACCACCAAUGGAAGUGACACCCCAAUCCAGAGAAUAU
CAAGAAUCACCUGGAA
>random_seq_from_cds__NO_6614 RANDOM_LENGTH 67 SEQ_LENGTH 58
  GC_CONTENT 0.620689655172414 BASEPAIR 20 FREE_ENERGY
-24.60 LEN_BP_RATIO 2.9
GCCAGAGCUGCGCGGUGAGGAAGACCAUCUCAGAUGGGGAUCCCCACAGUGUUCACCUGGUCCUU
GA
>random_seq_from_cds__NO_6615 RANDOM_LENGTH 90 SEQ_LENGTH 70
  GC_CONTENT 0.628571428571429 BASEPAIR 25 FREE_ENERGY
-26.00 LEN_BP_RATIO 2.8
GUCCCAGCAGGCUGUAGGCGAUGCGCUUCUGGUGGCCGGCAGCCGCACCCCAAUCCUCUUGAUG
UCGCUCGUUGGUCAUCUGCACCACC
>random_seq_from_cds__NO_6619 RANDOM_LENGTH 72 SEQ_LENGTH 52
  GC_CONTENT 0.711538461538462 BASEPAIR 21 FREE_ENERGY
-28.70 LEN_BP_RATIO 2.47619047619048
GGCGGCACGCUCCUGCUGCCAGCACUGCAUCAUGAGCUGGUAGAUGGCGGAGGGGCAGUCCAUG
GGUGUGG
>random_seq_from_cds__NO_6629 RANDOM_LENGTH 66 SEQ_LENGTH 58
  GC_CONTENT 0.672413793103448 BASEPAIR 21 FREE_ENERGY
-16.60 LEN_BP_RATIO 2.76190476190476
AAUACCCGCAAGUUGCCAGAUCUCCUCCGGGGCACAGCGUCUGGAAUUCGUGCACCUCUGCUGCCG
G
>random_seq_from_cds__NO_6632 RANDOM_LENGTH 67 SEQ_LENGTH 50
  GC_CONTENT 0.64 BASEPAIR 19 FREE_ENERGY -23.10
  LEN_BP_RATIO 2.63157894736842
GAGACGCUAAGCGAGGUGGUGCUGCGGCCUCCAGCCUCACCUUGGGGGCUCUCCUGUCUGGUUGA
UG
>random_seq_from_cds__NO_6642 RANDOM_LENGTH 84 SEQ_LENGTH 73
  GC_CONTENT 0.671232876712329 BASEPAIR 26 FREE_ENERGY
-35.40 LEN_BP_RATIO 2.80769230769231
CCUGGAAGGCCAGGUAGAAGCCUUUGCGGGUGAGCGGCCCCACGGAGCGCUCCUCCACGUUCAGC
UUCACGUGGCGUGCCUCGA
>random_seq_from_cds__NO_6657 RANDOM_LENGTH 75 SEQ_LENGTH 60
  GC_CONTENT 0.566666666666667 BASEPAIR 20 FREE_ENERGY
-23.90 LEN_BP_RATIO 3
AACUCCACGUUUUCUGCUACCUUGGAACCGAGGAGUCUCUUCUCCUUCUUCUUCUUCUUCUUCUUC
GAGCCCGACU
>random_seq_from_cds__NO_6663 RANDOM_LENGTH 86 SEQ_LENGTH 56
  GC_CONTENT 0.5 BASEPAIR 23 FREE_ENERGY -20.50 LEN_BP_RATIO
2.43478260869565
UGUCAAGAAUUUGGCCUGGGUGGACUCAGACCAGCUCUCCUCUAUCAGCAUUUUUGGUGUCUCCAG
```

```
UGAUCAAAAAGAGAGUGGUUG
>random_seq_from_cds__NO_6666 RANDOM_LENGTH 72 SEQ_LENGTH 64
  GC_CONTENT 0.703125 BASEPAIR 20 FREE_ENERGY -20.70
  LEN_BP_RATIO 3.2
UGCAGCGUUCAGCCAGCUCCACCGUGCGCCGUGUGGAAGCCGCGGCCACAGCACAGCAGCUCACAG
CCGUCGA
>random_seq_from_cds__NO_6667 RANDOM_LENGTH 82 SEQ_LENGTH 78
  GC_CONTENT 0.6666666666666667 BASEPAIR 29 FREE_ENERGY
-36.20 LEN_BP_RATIO 2.68965517241379
UGGCCUUGGACGUCUUGUUGCAUGUGCGGCCCCUCGUGCCCAGCACGCCGUGCGCAUGUCCUGC
UCACAGAAGUCGGGGCU
>random_seq_from_cds__NO_6683 RANDOM_LENGTH 86 SEQ_LENGTH 67
  GC_CONTENT 0.552238805970149 BASEPAIR 24 FREE_ENERGY
-25.00 LEN_BP_RATIO 2.791666666666667
CUUUACCUGGUGACUGUUCUCCUUGGUCACUCGACGGGAAUCCUCCAGCUGAGUGAUGAUGGUC
UGCACACGGUCAUUCGCCGCC
>random_seq_from_cds__NO_6687 RANDOM_LENGTH 86 SEQ_LENGTH 80
  GC_CONTENT 0.6625 BASEPAIR 30 FREE_ENERGY -40.90
  LEN_BP_RATIO 2.666666666666667
AUGAUCACCUCGUGGCGGCAGGUGGGGCAGCGGAAACGGCCUCCAGACAUGGACACUGAGCUGCC
CCGGCUGGUCCAGUAGGGAUU
>random_seq_from_cds__NO_6721 RANDOM_LENGTH 110 SEQ_LENGTH 75
  GC_CONTENT 0.5466666666666667 BASEPAIR 29 FREE_ENERGY
-33.30 LEN_BP_RATIO 2.58620689655172
AGCACACGAUGUAUUUUGCCUGAUUUAGAUCUGGGGGCUGGUGGGGGCCAUAGCCUUGGCAGCUU
GCUGGGCUAACCAGUACUUAUAUCUUUUGGUCUUGGGCUUCUCAA
>random_seq_from_cds__NO_6731 RANDOM_LENGTH 72 SEQ_LENGTH 54
  GC_CONTENT 0.703703703703704 BASEPAIR 21 FREE_ENERGY
-34.01 LEN_BP_RATIO 2.57142857142857
CCUCUCCAGCCUCCUGAGGACCCGGGGCUGCGUGAGCGAGCAGAGGCUUAAGGUCUUCAGCGGGG
CGCUCCA
>random_seq_from_cds__NO_6734 RANDOM_LENGTH 78 SEQ_LENGTH 61
  GC_CONTENT 0.688524590163934 BASEPAIR 21 FREE_ENERGY
-30.10 LEN_BP_RATIO 2.9047619047619
UCCUACCGCAUUGGGGAGGACGGCUCCAUCUGCGUCUUGUACGAGGAGGCCCCACUGGCCGCCUC
CUGUGGGCUCCUC
>random_seq_from_cds__NO_6751 RANDOM_LENGTH 68 SEQ_LENGTH 53
  GC_CONTENT 0.452830188679245 BASEPAIR 19 FREE_ENERGY
-15.50 LEN_BP_RATIO 2.78947368421053
AAGAAGUUCAGCACAAGACUUGAGAAAACUCUGUGAGAGACUCAGGGGUAUGGAUUCUAGCACU
CCC
>random_seq_from_cds__NO_6754 RANDOM_LENGTH 83 SEQ_LENGTH 71
  GC_CONTENT 0.366197183098592 BASEPAIR 24 FREE_ENERGY
-16.30 LEN_BP_RATIO 2.958333333333333
```



UGAUGAAGCUUAUGACCUGCUUGAUAAACUUCUAGAUCUAAAUCCAGCUUCAAGAAUAACAGCAG  
AAGAAGCUUUGUUGCAUC

>random\_seq\_from\_cds\_\_NO\_6758 RANDOM\_LENGTH 87 SEQ\_LENGTH 80  
GC\_CONTENT 0.5375 BASEPAIR 26 FREE\_ENERGY -20.62  
LEN\_BP\_RATIO 3.07692307692308

AUUUGGAUGGAGAGCUCUGUCUAGGGGCUGGGGUUGGAGCGUGAGUUGGUCGAUGGUGUGGUAGA  
AGUCACAGGGGUCAAUUC AAC

>random\_seq\_from\_cds\_\_NO\_6763 RANDOM\_LENGTH 72 SEQ\_LENGTH 54  
GC\_CONTENT 0.7222222222222222 BASEPAIR 19 FREE\_ENERGY  
-23.70 LEN\_BP\_RATIO 2.84210526315789

UGCUGAGUGGCAGGAAAGAGACCCGGCUGGCCCAUGCGAUGGGCUGAGCCCCGGCAUCACCUG  
AGCGACU

>random\_seq\_from\_cds\_\_NO\_6768 RANDOM\_LENGTH 110 SEQ\_LENGTH 86  
GC\_CONTENT 0.476744186046512 BASEPAIR 31 FREE\_ENERGY  
-26.60 LEN\_BP\_RATIO 2.7741935483871

UCACGGAUUGGCUCGUGUCCAGCCUCAAACACAAUGUACCUGGUACACAGGAUCUUCAACAUCU  
CUUCCAAUAUUGUCCUGGUACACAGCUUGUUCACACUGCUUAUCC

>random\_seq\_from\_cds\_\_NO\_6770 RANDOM\_LENGTH 87 SEQ\_LENGTH 78  
GC\_CONTENT 0.538461538461538 BASEPAIR 20 FREE\_ENERGY  
-19.55 LEN\_BP\_RATIO 3.9

CAGCCCGCUGGGCUGUUUUUAUGGCCACAAUCUGUGAUUCCCUUCCUCCACAAACAUAUCC  
AAAGGCCCGGUGAUCUGUAAUG

>random\_seq\_from\_cds\_\_NO\_6774 RANDOM\_LENGTH 72 SEQ\_LENGTH 61  
GC\_CONTENT 0.524590163934426 BASEPAIR 20 FREE\_ENERGY  
-17.21 LEN\_BP\_RATIO 3.05

AAAGUGGCUUCACUGCGAUCCUGACCCUUCUUCUUGGAGUCUUCUUGGCGCUGGUUUUCACAG  
CUACUUG

>random\_seq\_from\_cds\_\_NO\_6789 RANDOM\_LENGTH 72 SEQ\_LENGTH 59  
GC\_CONTENT 0.576271186440678 BASEPAIR 20 FREE\_ENERGY  
-20.34 LEN\_BP\_RATIO 2.95

UACCGGGUGGACCAUUACUUAGGCAAGCAGGGCUGUGGCGAGAUCUGCCUUUCCGAGACCAGA  
ACCGCAA

>random\_seq\_from\_cds\_\_NO\_6790 RANDOM\_LENGTH 68 SEQ\_LENGTH 60  
GC\_CONTENT 0.6166666666666667 BASEPAIR 20 FREE\_ENERGY  
-20.80 LEN\_BP\_RATIO 3

GGCUUUGGACGGCCUCUGGAACCGGCACCAUGUGGAGCGGGUGGAGAUCAUCAUGAAAGAGACCG  
UGG

>random\_seq\_from\_cds\_\_NO\_6793 RANDOM\_LENGTH 85 SEQ\_LENGTH 77  
GC\_CONTENT 0.61038961038961 BASEPAIR 29 FREE\_ENERGY  
-28.00 LEN\_BP\_RATIO 2.6551724137931

AGUCUACAGUGAGCAGGUGCGCAGAGAGCUGCAGAAGCCAGACAGCUUCCACAGCCUGACGCCG  
ACCUUCGCAGGUGGUCCUAG

>random\_seq\_from\_cds\_\_NO\_6806 RANDOM\_LENGTH 87 SEQ\_LENGTH 62  
GC\_CONTENT 0.725806451612903 BASEPAIR 19 FREE\_ENERGY

---

-23.81 LEN\_BP\_RATIO 3.26315789473684  
CCCACAGUCACCCACUGGCCUGGAUGGCGAGCAGCUGGUCGUGCUGACCACGAGCCCCUCCCAGC  
CACACCGCCGCAUGAGCCUUAG  
>random\_seq\_from\_cds\_\_NO\_6819 RANDOM\_LENGTH 62 SEQ\_LENGTH 55  
GC\_CONTENT 0.654545454545455 BASEPAIR 19 FREE\_ENERGY  
-17.80 LEN\_BP\_RATIO 2.89473684210526  
ACGGGGAUGACAUGCCAAGCUCGGAGCUCCUACCUGGUAGACGAGGUGCUGUGGGGCCACC  
>random\_seq\_from\_cds\_\_NO\_6822 RANDOM\_LENGTH 92 SEQ\_LENGTH 55  
GC\_CONTENT 0.763636363636364 BASEPAIR 20 FREE\_ENERGY  
-30.40 LEN\_BP\_RATIO 2.75  
GGUGGAGGAGGAGGGGGCGGGGGAGGGGGCGGGUGGGGAAGCUGGGGCUGACAAGGAGCAGAAUG  
GCUGCCUGCCACCCCAGAGAGUGAGU  
>random\_seq\_from\_cds\_\_NO\_6825 RANDOM\_LENGTH 88 SEQ\_LENGTH 56  
GC\_CONTENT 0.517857142857143 BASEPAIR 21 FREE\_ENERGY  
-19.10 LEN\_BP\_RATIO 2.66666666666667  
CCACCACUGCCUCCACUACCGCUGCCACCCUGAAGAAGAGAGGGAACCACAGCACAGGCCUGUG  
UCUCCUUGUGAUGUUUUUCAUGG  
>random\_seq\_from\_cds\_\_NO\_6830 RANDOM\_LENGTH 81 SEQ\_LENGTH 67  
GC\_CONTENT 0.567164179104478 BASEPAIR 23 FREE\_ENERGY  
-21.00 LEN\_BP\_RATIO 2.91304347826087  
AACAAACUGCCCCUGAGCCACAAGGUCUACAUGAGGAACUCUAAGUAUCCCCAGGAUCUGGUGAU  
GAUGGAGGGGAAGAUG  
>random\_seq\_from\_cds\_\_NO\_6831 RANDOM\_LENGTH 65 SEQ\_LENGTH 56  
GC\_CONTENT 0.589285714285714 BASEPAIR 21 FREE\_ENERGY  
-25.60 LEN\_BP\_RATIO 2.66666666666667  
AUGAGCUACUGCACUACUGGGCAGAUGUGGGCCCGCAGCAGCUACCUGGGGCAGUGUCAAUCU  
>random\_seq\_from\_cds\_\_NO\_6832 RANDOM\_LENGTH 98 SEQ\_LENGTH 77  
GC\_CONTENT 0.402597402597403 BASEPAIR 26 FREE\_ENERGY  
-19.60 LEN\_BP\_RATIO 2.96153846153846  
UACCAGUGCUGAUCAUUUAUAUGUCAACGUAUCUGAGCUCUCUGGUCAAUUUUGAGGAAUCUC  
AGACGUUUUUCGGCUUAUAUAAGCUCUAACUA  
>random\_seq\_from\_cds\_\_NO\_6835 RANDOM\_LENGTH 79 SEQ\_LENGTH 60  
GC\_CONTENT 0.55 BASEPAIR 19 FREE\_ENERGY -24.90  
LEN\_BP\_RATIO 3.15789473684211  
AAGAGGGGCUCCUCAUCCUUCUGGUAAGAAGGCUAAUGUUGACUUCUGGGAGAAGUAGCCCUU  
CAGGGAGAUGAGAU  
>random\_seq\_from\_cds\_\_NO\_6861 RANDOM\_LENGTH 79 SEQ\_LENGTH 54  
GC\_CONTENT 0.481481481481481 BASEPAIR 20 FREE\_ENERGY  
-16.90 LEN\_BP\_RATIO 2.7  
UAGAUGAGGAGGAAGGAUGGGUGGGGAUUUGAAUCUUCCUCAGAUCGAAACGCAUACAUUUCU  
GACCAUAAGGCCCU  
>random\_seq\_from\_cds\_\_NO\_6874 RANDOM\_LENGTH 82 SEQ\_LENGTH 73  
GC\_CONTENT 0.657534246575342 BASEPAIR 25 FREE\_ENERGY  
-28.40 LEN\_BP\_RATIO 2.92

---

CAGGCUGCAGCUGGACAGAGUGGCAGAGGCGGCUGAGGCUUGGGCAGCCAGGUCCCGUAAGCAG  
GCGACUUCAGGAAGCGU

>random\_seq\_from\_cds\_\_NO\_6880 RANDOM\_LENGTH 84 SEQ\_LENGTH 54  
GC\_CONTENT 0.62962962962963 BASEPAIR 19 FREE\_ENERGY  
-22.70 LEN\_BP\_RATIO 2.84210526315789

AUUUGUGAAGAAAGAUCCCCAGACGUGUCUUGAACUCUUUGGCUCCUCUCCAGGCAGGUGGUGGG  
GAAGGCGGCCAGGGUGCGG

>random\_seq\_from\_cds\_\_NO\_6884 RANDOM\_LENGTH 84 SEQ\_LENGTH 65  
GC\_CONTENT 0.661538461538462 BASEPAIR 23 FREE\_ENERGY  
-27.30 LEN\_BP\_RATIO 2.82608695652174

AGGAUGCUGUGGGCUCCAUGAUGCAGGGUCGGUGCUGCUGCUGGGCUGGGCAGAGUCAGGGCUG  
GGCAGAGGGUGGAGGUAG

>random\_seq\_from\_cds\_\_NO\_6886 RANDOM\_LENGTH 62 SEQ\_LENGTH 50  
GC\_CONTENT 0.66 BASEPAIR 19 FREE\_ENERGY -19.60  
LEN\_BP\_RATIO 2.63157894736842

GUUGUCCUCAGUCCUGUCGGGCACUCCAGUCUCGUCUGCGGAGGGGCCUUGACGGCAAUC

>random\_seq\_from\_cds\_\_NO\_6887 RANDOM\_LENGTH 110 SEQ\_LENGTH 98  
GC\_CONTENT 0.530612244897959 BASEPAIR 35 FREE\_ENERGY  
-35.40 LEN\_BP\_RATIO 2.8

ACUGUCUGCUCCUAAAGUUGCCAACAGCACGGAUAUCCUGGUAAGUCACAUAGGCCAGCUCUCU  
UGUUGGCCUUGUCCUCAGUCAGGUGCUUGAAGCUCAGAGAGCAGC

>random\_seq\_from\_cds\_\_NO\_6893 RANDOM\_LENGTH 81 SEQ\_LENGTH 72  
GC\_CONTENT 0.6944444444444444 BASEPAIR 25 FREE\_ENERGY  
-35.80 LEN\_BP\_RATIO 2.88

AUCCAGCUCCUUUUGGCCCGGCAGCCGGCCUGCCGGCAGGCAUCGCACAACUUGGCCUCGGGU  
CCGUGGGGAGUGGCGU

>random\_seq\_from\_cds\_\_NO\_6894 RANDOM\_LENGTH 81 SEQ\_LENGTH 64  
GC\_CONTENT 0.6875 BASEPAIR 23 FREE\_ENERGY -34.70  
LEN\_BP\_RATIO 2.78260869565217

CGAGGCAGGUGCCUGGCGCCGUCGCGGGAGGCGCCGUCUGCGGGUACAGCGGUGUGUAGUAGGUA  
GCAGUAGCUGGGCAGA

>random\_seq\_from\_cds\_\_NO\_6898 RANDOM\_LENGTH 110 SEQ\_LENGTH 83  
GC\_CONTENT 0.373493975903614 BASEPAIR 30 FREE\_ENERGY  
-23.20 LEN\_BP\_RATIO 2.76666666666667

CCUUGCAUUUGAUAUGUCUGUGUCCAUCUGGGAGAGUCUUAUAUUGAACUUAACUUAUUUA  
AGACUUCUUGGUUGCCUGGGGAUAUGAGGUAUGAUUUCACCAUCU

>random\_seq\_from\_cds\_\_NO\_6919 RANDOM\_LENGTH 63 SEQ\_LENGTH 50  
GC\_CONTENT 0.62 BASEPAIR 19 FREE\_ENERGY -18.50  
LEN\_BP\_RATIO 2.63157894736842

GCAUGACCAUCGCUGCCUACCAGACCCUGUACGAGAGCAGCGUGGCGUUUGGCAUGAGGAAGG

>random\_seq\_from\_cds\_\_NO\_6922 RANDOM\_LENGTH 73 SEQ\_LENGTH 55  
GC\_CONTENT 0.5454545454545454 BASEPAIR 19 FREE\_ENERGY  
-16.90 LEN\_BP\_RATIO 2.89473684210526

GAAGCACAAUGAGGAGAUUCAGUCCUGAAGCGAACAAAUCAGCAGCUGAAGGGCCCAACUGGAA

```
GGCAUUAU
>random_seq_from_cds__NO_6923 RANDOM_LENGTH 99 SEQ_LENGTH 81
  GC_CONTENT 0.4444444444444444 BASEPAIR 26 FREE_ENERGY
  -18.00 LEN_BP_RATIO 3.11538461538462
UGCACCAAAGAAGUGAAAUGUCCUGCUCUUCUCUCGAUGCAACUCUAUCGUCACAGUCAAGAAA
AAUAAGAGACACAUGGCUGAGGUGAAUGCAUCCC
>random_seq_from_cds__NO_6932 RANDOM_LENGTH 97 SEQ_LENGTH 85
  GC_CONTENT 0.647058823529412 BASEPAIR 32 FREE_ENERGY
  -38.30 LEN_BP_RATIO 2.65625
UGCAUCUGCCUCAGAGCCCGAGUACAUGGAGGAGGGUGCGGCGGCAGCACAUUGGAGCGUUGUACC
AGCUUCCUGGUGGAUGAGCUGGGCGUGGUGGA
>random_seq_from_cds__NO_6937 RANDOM_LENGTH 72 SEQ_LENGTH 59
  GC_CONTENT 0.542372881355932 BASEPAIR 20 FREE_ENERGY
  -18.30 LEN_BP_RATIO 2.95
CUGGAGCUCUUGGCUCAAGACUAUAAGCUGCGAAUUAAGCAGAUUACGGAGGAAGUGGAGAGGCA
GGGUGUC
>random_seq_from_cds__NO_6940 RANDOM_LENGTH 68 SEQ_LENGTH 51
  GC_CONTENT 0.568627450980392 BASEPAIR 19 FREE_ENERGY
  -19.90 LEN_BP_RATIO 2.68421052631579
UCCACGGCCAUCACCAACUCCCUGCAGACCAUGCAGCAGGACAUGAUAGGAUGGCUUGAAACCCC
UCC
>random_seq_from_cds__NO_6955 RANDOM_LENGTH 78 SEQ_LENGTH 60
  GC_CONTENT 0.4666666666666667 BASEPAIR 24 FREE_ENERGY
  -20.30 LEN_BP_RATIO 2.5
GUGAAAAUGAUGUUAAGUGGUGUGGCUUGUUUGCUGUUUUCAUAGCUUUGCUGCCCAUCCUUGG
ACAUCGAGACUAU
>random_seq_from_cds__NO_6958 RANDOM_LENGTH 110 SEQ_LENGTH 81
  GC_CONTENT 0.481481481481481 BASEPAIR 29 FREE_ENERGY
  -23.60 LEN_BP_RATIO 2.79310344827586
AAGAGUUAAAUUAAAAGUCAGCAGCACAGACAAGGCAGAUCAUCAUUUGGAAAUGGUAUCC
AGCUCCUGGCGAUAAUGUGUGUCUCCUGUAUUUGUUGGAGCCCAU
>random_seq_from_cds__NO_6969 RANDOM_LENGTH 78 SEQ_LENGTH 55
  GC_CONTENT 0.618181818181818 BASEPAIR 21 FREE_ENERGY
  -26.40 LEN_BP_RATIO 2.61904761904762
CCCGCACGUGUACCGUUUCUCCUCAUAAGAGGUAUCCGUGAACUCCAGGAGCAGGCGGAUGGCGU
GCGCCAGCCCCAC
>random_seq_from_cds__NO_6979 RANDOM_LENGTH 110 SEQ_LENGTH 72
  GC_CONTENT 0.3472222222222222 BASEPAIR 24 FREE_ENERGY
  -16.50 LEN_BP_RATIO 3
AAAUUAUGACAUUUUCAAAAAUCUACAUAUUUGAUCAGUCUUUUUAUGAUCUAUCGUGCAA
ACCAGUGAAAUCAAGAAGAAGAAAAGGAACUGAGAAGAACUACA
>random_seq_from_cds__NO_6985 RANDOM_LENGTH 89 SEQ_LENGTH 58
  GC_CONTENT 0.46551724137931 BASEPAIR 22 FREE_ENERGY
  -19.30 LEN_BP_RATIO 2.63636363636364
```

---

GGCAUUCUGCUGAAUGUACCACCAUUUAUAACAGAGGUGAACAUACAAGUGGCAUGUAUGCCAU  
CAGACCCAGCAACUCUCAAGUUUU

>random\_seq\_from\_cds\_\_NO\_6989 RANDOM\_LENGTH 86 SEQ\_LENGTH 60  
GC\_CONTENT 0.4333333333333333 BASEPAIR 21 FREE\_ENERGY  
-18.40 LEN\_BP\_RATIO 2.85714285714286

UACUGGCAAUGUCCCCAAUGCAAUCCCGGAAAACAAAGAUUUGGUGUUUUCUACUUGGGAUCACA  
AAGCAAAAGGACACUUCAACU

>random\_seq\_from\_cds\_\_NO\_7016 RANDOM\_LENGTH 62 SEQ\_LENGTH 57  
GC\_CONTENT 0.614035087719298 BASEPAIR 22 FREE\_ENERGY  
-26.10 LEN\_BP\_RATIO 2.59090909090909

CAGCAGAGUUAGGGUGCCUCCUCCAGGGGUGGAGGUGGAGUUCAGCCCCCGAUUAUUGU

>random\_seq\_from\_cds\_\_NO\_7025 RANDOM\_LENGTH 73 SEQ\_LENGTH 60  
GC\_CONTENT 0.6166666666666667 BASEPAIR 21 FREE\_ENERGY  
-22.70 LEN\_BP\_RATIO 2.85714285714286

CACCACCCACUACUACCGUGUCAUGCAGCUGUGUUUCUGGUGGGAGCUCUUUGACCGGAUCCUG  
GAGCGGGG

>random\_seq\_from\_cds\_\_NO\_7026 RANDOM\_LENGTH 94 SEQ\_LENGTH 86  
GC\_CONTENT 0.5 BASEPAIR 27 FREE\_ENERGY -23.90 LEN\_BP\_RATIO  
3.18518518518519

UGUCUACACAGAGAAGGAUGCCAGUCUGGUGAUCCAGCAGGUCUUGUCGGCAGUGAAAUACCUAC  
AUGAGAAUGGCAUCGUCCACAGAGACUUA

>random\_seq\_from\_cds\_\_NO\_7035 RANDOM\_LENGTH 110 SEQ\_LENGTH 80  
GC\_CONTENT 0.7 BASEPAIR 25 FREE\_ENERGY -31.60 LEN\_BP\_RATIO  
3.2

CUGACCCAAUUAACCGGCCAGCAUGGCCGCGGCCACUCGCCCCUGGUGGCAGGUCCCUCAACUG  
CCUGGUCAAUGGCUCCUCCACAUCAGCAGCAGCCUGGUGCCCAU

>random\_seq\_from\_cds\_\_NO\_7039 RANDOM\_LENGTH 79 SEQ\_LENGTH 67  
GC\_CONTENT 0.597014925373134 BASEPAIR 25 FREE\_ENERGY  
-27.70 LEN\_BP\_RATIO 2.68

GAUCCUGUCUGGCUCGCUUAGGAUUCUGCAGGUCACCAGGUGGUGAGGCCUUGCUUGCUGAGAUG  
CUCCGGAGAGAAUG

>random\_seq\_from\_cds\_\_NO\_7049 RANDOM\_LENGTH 102 SEQ\_LENGTH 96  
GC\_CONTENT 0.6354166666666667 BASEPAIR 35 FREE\_ENERGY  
-37.20 LEN\_BP\_RATIO 2.74285714285714

GUCAGGGACUUAUCAUUGGCCAGAAUGUCACAGGCCCUUGCUCCUCAGGUCUUCGAGGCAGGAGG  
CGGCCACGCCUGCUGUUCGCGGCUGUAGUUGCGGCG

>random\_seq\_from\_cds\_\_NO\_7051 RANDOM\_LENGTH 96 SEQ\_LENGTH 91  
GC\_CONTENT 0.538461538461538 BASEPAIR 31 FREE\_ENERGY  
-26.60 LEN\_BP\_RATIO 2.93548387096774

GCUGUGGCUGAAGAGGCUCUGGGUGCUCUUGGAGGUGGCUGUGCAUGUGGUCGUGGGUAAAGUGC  
UUCUGAUUAUUGUUCCAGACAGAGUCAAGCG

>random\_seq\_from\_cds\_\_NO\_7053 RANDOM\_LENGTH 79 SEQ\_LENGTH 65  
GC\_CONTENT 0.553846153846154 BASEPAIR 23 FREE\_ENERGY  
-26.90 LEN\_BP\_RATIO 2.82608695652174

CCCAGUAUUUCUGGUUCGUCUUGAAGGUCCGUUGGCAGCGACUAGAGGACACGACUGAGCUAGGG  
GGUCUGGCCCCAAA

>random\_seq\_from\_cds\_\_NO\_7066 RANDOM\_LENGTH 72 SEQ\_LENGTH 61  
GC\_CONTENT 0.639344262295082 BASEPAIR 19 FREE\_ENERGY  
-21.70 LEN\_BP\_RATIO 3.21052631578947

UCCCGCUGCUCCUCAACCCUGCGCAGCUGAAAACCCUUGACGGAUGGCUGAAAGCAGGUCGCUAC  
GGGCAUC

>random\_seq\_from\_cds\_\_NO\_7072 RANDOM\_LENGTH 73 SEQ\_LENGTH 56  
GC\_CONTENT 0.517857142857143 BASEPAIR 19 FREE\_ENERGY  
-19.60 LEN\_BP\_RATIO 2.94736842105263

AUCUUUUGGGUCCAGCCAAACCAGAUCCUCUUUGGUUGUCCACUGGGUAACCUGAAUUCUGCUGG  
UGGAGGAG

>random\_seq\_from\_cds\_\_NO\_7076 RANDOM\_LENGTH 110 SEQ\_LENGTH 68  
GC\_CONTENT 0.397058823529412 BASEPAIR 24 FREE\_ENERGY  
-19.95 LEN\_BP\_RATIO 2.83333333333333

CUAUGCUUUCUCUUCUCUUUCAUGAUAUCCUUGGUGUCCUGCAGCAUCUUCUCCUCCAAAGAUC  
AAAGAAGUAUGAAGGGUCUGUGUAGAAUUUGAGUGCCUCUUUCC

>random\_seq\_from\_cds\_\_NO\_7079 RANDOM\_LENGTH 87 SEQ\_LENGTH 76  
GC\_CONTENT 0.552631578947368 BASEPAIR 25 FREE\_ENERGY  
-24.90 LEN\_BP\_RATIO 3.04

CCUUCUUCUCCUUGGGAUCCAGCUGAGUGACUUUAACCGUAGUCGGUCGACCCUCUCAGCAAG  
GGAGCUUACCCGAGAGGCAAAG

>random\_seq\_from\_cds\_\_NO\_7092 RANDOM\_LENGTH 90 SEQ\_LENGTH 72  
GC\_CONTENT 0.680555555555556 BASEPAIR 27 FREE\_ENERGY  
-33.20 LEN\_BP\_RATIO 2.66666666666667

GUGGAAGGUAGUGACCAGCACAGCCAGCGCCUGCUCCAGAGAACUGCACAUCAUGCGGCUGGCGC  
UGCUCUGGGCCCUGGGCUCUCCUGG

>random\_seq\_from\_cds\_\_NO\_7093 RANDOM\_LENGTH 73 SEQ\_LENGTH 57  
GC\_CONTENT 0.701754385964912 BASEPAIR 21 FREE\_ENERGY  
-28.70 LEN\_BP\_RATIO 2.71428571428571

CGCGGGCAGCCUCUGCCUCCUGGCCGCUCCCAAUAUAGGGUGGCACUGAGGAGCAGCAGGCA  
GAGUCAGA

>random\_seq\_from\_cds\_\_NO\_7098 RANDOM\_LENGTH 100 SEQ\_LENGTH 91  
GC\_CONTENT 0.571428571428571 BASEPAIR 24 FREE\_ENERGY  
-26.75 LEN\_BP\_RATIO 3.79166666666667

GGUCCUCCAUUAUUUCGCGAAUCCAAGAUCUCCACCUGCCAGGCCACACCUGUGCCUGAGCUG  
GCGGGAAUCUGUACACACUCAGAAGCCACCAGAGC

>random\_seq\_from\_cds\_\_NO\_7101 RANDOM\_LENGTH 94 SEQ\_LENGTH 74  
GC\_CONTENT 0.662162162162162 BASEPAIR 26 FREE\_ENERGY  
-26.20 LEN\_BP\_RATIO 2.84615384615385

AAUGUACGAGUGGCACUAGUGGGCCUGGAGGCCUGGACCCAGCGUGACCUGGUGGAGAUCAAGCCC  
AAACCAGCUGUCACCCUCGAAAACUCC

>random\_seq\_from\_cds\_\_NO\_7114 RANDOM\_LENGTH 84 SEQ\_LENGTH 73  
GC\_CONTENT 0.534246575342466 BASEPAIR 28 FREE\_ENERGY

---

-29.30 LEN\_BP\_RATIO 2.60714285714286  
AUAGACCAUCGAUGCCAGCGUGUGGAUCUCCUGGGGCACAGGAAUGUCGAAGCAAUGCCAUGG  
ACAUGGGGGUCUGUGACAG  
>random\_seq\_from\_cds\_\_NO\_7120 RANDOM\_LENGTH 98 SEQ\_LENGTH 78  
GC\_CONTENT 0.641025641025641 BASEPAIR 27 FREE\_ENERGY  
-35.80 LEN\_BP\_RATIO 2.88888888888889  
AGUGUCCUCGCUCUACCUCUGAGAUGGCGGACGGGGAGCUGAACGUGGACAGCCUCAUCACCCGG  
CUGCUGGAGGGUACGAGGAUGUCGUCCAGGAAA  
>random\_seq\_from\_cds\_\_NO\_7150 RANDOM\_LENGTH 89 SEQ\_LENGTH 75  
GC\_CONTENT 0.466666666666667 BASEPAIR 19 FREE\_ENERGY  
-18.30 LEN\_BP\_RATIO 3.94736842105263  
GCAGUCUCUUGGUACUUUUGAUGCACAGCGUUUAUGGCAGUUGAAUUUGCAAUCCUUUACACUGC  
AUUCCUUGGCGAAAGAGGCCUUUC  
>random\_seq\_from\_cds\_\_NO\_7153 RANDOM\_LENGTH 79 SEQ\_LENGTH 65  
GC\_CONTENT 0.492307692307692 BASEPAIR 19 FREE\_ENERGY  
-16.40 LEN\_BP\_RATIO 3.42105263157895  
GUCUUGAACUGAGAGGCCGGGUCCUGGUAAGAUACA AUUUGACAGACGUCUCUUUCUACUCCA  
CUACAGUUUUUGG  
>random\_seq\_from\_cds\_\_NO\_7179 RANDOM\_LENGTH 68 SEQ\_LENGTH 61  
GC\_CONTENT 0.540983606557377 BASEPAIR 19 FREE\_ENERGY  
-16.10 LEN\_BP\_RATIO 3.21052631578947  
GUGGAGAAGUGGGAGCACGCAGUCAUGGUAACAGGAGAAACGUGGACUUCAGGAACUCUUUGU  
CUC  
>random\_seq\_from\_cds\_\_NO\_7203 RANDOM\_LENGTH 73 SEQ\_LENGTH 62  
GC\_CONTENT 0.483870967741936 BASEPAIR 23 FREE\_ENERGY  
-20.00 LEN\_BP\_RATIO 2.69565217391304  
AGCAUGUUAGCCUAGGUUUUGUUUGGGCAAGCUGUCGACUUGGCCGUCUAAUAGACUGUUUUUGC  
UGUAUCUU  
>random\_seq\_from\_cds\_\_NO\_7254 RANDOM\_LENGTH 82 SEQ\_LENGTH 71  
GC\_CONTENT 0.591549295774648 BASEPAIR 25 FREE\_ENERGY  
-23.80 LEN\_BP\_RATIO 2.84  
GAACCGCCGUUCUUCUGACACUGGCUCCAAGGCACCCCCACCUUCAAGGGUCUCACUUAUGGAC  
CAGUCAGUAAGAGAAGG  
>random\_seq\_from\_cds\_\_NO\_7256 RANDOM\_LENGTH 71 SEQ\_LENGTH 64  
GC\_CONTENT 0.75 BASEPAIR 26 FREE\_ENERGY -39.40  
LEN\_BP\_RATIO 2.46153846153846  
CCAGCGGCGCUUUGCGGAGGAGCUGAGGGUGGGCUGUGCCGCGCUGCGGAUCCUGGCUGCAGAGC  
GUGGCG  
>random\_seq\_from\_cds\_\_NO\_7257 RANDOM\_LENGTH 64 SEQ\_LENGTH 50  
GC\_CONTENT 0.64 BASEPAIR 19 FREE\_ENERGY -19.30  
LEN\_BP\_RATIO 2.63157894736842  
AUGCUGGUUUCUACACUUGCAAAGCGGUCAAUGAGUAUGGUGCUCGGCAGUGCGAGGCCCGCUU  
>random\_seq\_from\_cds\_\_NO\_7270 RANDOM\_LENGTH 69 SEQ\_LENGTH 63  
GC\_CONTENT 0.476190476190476 BASEPAIR 24 FREE\_ENERGY

-18.60 LEN\_BP\_RATIO 2.625  
CAGCUCaucugcagucacAUUUAGUGAAGAAACUAUAUGGUCUAUACUGCUGGCUCAUCAGGUGA  
CUGG  
>random\_seq\_from\_cds\_\_NO\_7280 RANDOM\_LENGTH 89 SEQ\_LENGTH 76  
GC\_CONTENT 0.421052631578947 BASEPAIR 21 FREE\_ENERGY  
-17.50 LEN\_BP\_RATIO 3.61904761904762  
UCGUUCUUGGUUACCAUGUAUAUUUUUGCUGGAGGCAUAACAUGGGAAACAUUGGUCGACAAC  
UGGCAAUGGUACGAAUGUAAAAGUU  
>random\_seq\_from\_cds\_\_NO\_7292 RANDOM\_LENGTH 89 SEQ\_LENGTH 80  
GC\_CONTENT 0.4875 BASEPAIR 29 FREE\_ENERGY -19.20  
LEN\_BP\_RATIO 2.75862068965517  
CAUGGGCAGCUAUCGAUGUACCUGCAAAAUAGGAUUUGGCCGGAUCCUACCUUUUCAAGUUGUG  
UUCGCUGAUCCCCUGUGAUCUCG  
>random\_seq\_from\_cds\_\_NO\_7293 RANDOM\_LENGTH 78 SEQ\_LENGTH 57  
GC\_CONTENT 0.526315789473684 BASEPAIR 20 FREE\_ENERGY  
-16.00 LEN\_BP\_RATIO 2.85  
GAAGAGAAAGGGCCUGUUACCGACUUGUCAGUUCUGGAAGACAGUGUAUGCACCCUCUGUCUGU  
UCACCUCACCAAG  
>random\_seq\_from\_cds\_\_NO\_7295 RANDOM\_LENGTH 79 SEQ\_LENGTH 70  
GC\_CONTENT 0.485714285714286 BASEPAIR 23 FREE\_ENERGY  
-22.20 LEN\_BP\_RATIO 3.04347826086957  
CGGUUCUGGCGUUCAUAGACGCAGGCCAAUCCAUCACCAUGUAGGUAAAGGACCUGUAUUUGUC  
AAGCCAAAGAACAC  
>random\_seq\_from\_cds\_\_NO\_7301 RANDOM\_LENGTH 82 SEQ\_LENGTH 72  
GC\_CONTENT 0.541666666666667 BASEPAIR 23 FREE\_ENERGY  
-24.00 LEN\_BP\_RATIO 3.1304347826087  
GUUCAGUGAACAACAGAGGAAAUGUGUGGGAUUAUGAUGAGUGUACUCAGGUCCAACACCUCUGC  
UCCCAGGGCCGUGUGA  
>random\_seq\_from\_cds\_\_NO\_7309 RANDOM\_LENGTH 70 SEQ\_LENGTH 61  
GC\_CONTENT 0.524590163934426 BASEPAIR 22 FREE\_ENERGY  
-17.90 LEN\_BP\_RATIO 2.77272727272727  
AUCUCUGUGCUCAUGGGCAGUGCAGGAACACUGAGGGCUCUUUCAUGUGUGUGUGACCAGGGU  
UACAG  
>random\_seq\_from\_cds\_\_NO\_7314 RANDOM\_LENGTH 88 SEQ\_LENGTH 64  
GC\_CONTENT 0.59375 BASEPAIR 25 FREE\_ENERGY -24.90  
LEN\_BP\_RATIO 2.56  
GCUGGCUCUUCCGUGCCUCUGUUAUCAGGGCUUUAAGCCCCACAGGAUGGGCAAGGGUGUGU  
GGGAUGUGAAUGAAUGUGAACUG  
>random\_seq\_from\_cds\_\_NO\_7321 RANDOM\_LENGTH 87 SEQ\_LENGTH 74  
GC\_CONTENT 0.459459459459459 BASEPAIR 27 FREE\_ENERGY  
-20.40 LEN\_BP\_RATIO 2.74074074074074  
GAUGAAUGUCAAGACCCCAGUAGUUGUAUUGAUGGCCAGUGUGUAAUACAGAGGGCUCUUACAA  
CUGCUUCUGUACUCACCCAUG  
>random\_seq\_from\_cds\_\_NO\_7326 RANDOM\_LENGTH 74 SEQ\_LENGTH 61



---

```
GC_CONTENT    0.409836065573771    BASEPAIR    20    FREE_ENERGY
-18.40    LEN_BP_RATIO    3.05
GGUUUUCUAAAUAGCUUUGAGGAGUUACAGGCUGAGGAAUGCGGCAUCCUCA AUGGAUGUGAAAA
UGGUCG CUG
>random_seq_from_cds__NO_7336    RANDOM_LENGTH    73    SEQ_LENGTH    65
GC_CONTENT    0.492307692307692    BASEPAIR    24    FREE_ENERGY
-20.20    LEN_BP_RATIO    2.708333333333333
UUGGUAACCACUUC CUGCCAUCA AAGCUAGCUACUAUAAAUGUUUUCUGUGCUUGCAAGGUAAG
UGGCC CAG
>random_seq_from_cds__NO_7354    RANDOM_LENGTH    109    SEQ_LENGTH    82
GC_CONTENT    0.304878048780488    BASEPAIR    33    FREE_ENERGY
-16.26    LEN_BP_RATIO    2.484848484848484
UUUUUUUCUUGUUUGUAGAGAUUUC AUGAUCCUGAAAUC CAUCUUAAGGAGUAUAACUUCAGUC
UAUAAGUAUUUUUAAGUAAUCAGUUAGAGUGUAAGUUUUGCGA
>random_seq_from_cds__NO_7364    RANDOM_LENGTH    85    SEQ_LENGTH    76
GC_CONTENT    0.552631578947368    BASEPAIR    23    FREE_ENERGY
-21.96    LEN_BP_RATIO    3.30434782608696
GGACCUGUAGUAGCGAUGCAGCACCAGGAUGAAGUCAGUGAUGGUCAGCAUCCCCACAAAGCUC
UGCUCUUGCUGUCCCAUAG
>random_seq_from_cds__NO_7382    RANDOM_LENGTH    90    SEQ_LENGTH    73
GC_CONTENT    0.493150684931507    BASEPAIR    24    FREE_ENERGY
-21.04    LEN_BP_RATIO    3.041666666666667
UGAUCCAAAAGAAGAUCAAAUACAGUGCAAGUAGCAUGGCAGCACAGCGUUGUGCAUCCAGGU
CUAGCGUGUCUCCUGUCUUCUGU
>random_seq_from_cds__NO_7407    RANDOM_LENGTH    85    SEQ_LENGTH    65
GC_CONTENT    0.553846153846154    BASEPAIR    24    FREE_ENERGY
-24.00    LEN_BP_RATIO    2.708333333333333
GGCAUCUGUUUCUGCAGUUUGAGGUGUUAAGGCACGUGCCCUGGAACUCCAGCCCGUAGAUCACU
GGUGCAUCGUCCUCAUGAU
>random_seq_from_cds__NO_7412    RANDOM_LENGTH    72    SEQ_LENGTH    64
GC_CONTENT    0.40625    BASEPAIR    23    FREE_ENERGY    -16.30
LEN_BP_RATIO    2.78260869565217
GACAGCACUUUCAAACCUGGAUUCAGAAUAUGAACAAUAUAUCUCCUCCCUUGGACAGU
UUGCUGA
>random_seq_from_cds__NO_7439    RANDOM_LENGTH    72    SEQ_LENGTH    64
GC_CONTENT    0.609375    BASEPAIR    22    FREE_ENERGY    -21.30
LEN_BP_RATIO    2.90909090909091
GAAGCUCUGGGUCCUCUGUCCAAUGCUAUGGUCCUGCAGCCCCUGCACCCAUGCCUAGGAAGUC
GCAGGCA
>random_seq_from_cds__NO_7442    RANDOM_LENGTH    96    SEQ_LENGTH    88
GC_CONTENT    0.545454545454545    BASEPAIR    30    FREE_ENERGY
-31.80    LEN_BP_RATIO    2.933333333333333
GCUGACUGAGAUGGACCUCGAGGAGGCGGGAAGAGUUAAAAGAACGCUGUACUCAGUGUGCUGCU
GUCUCAUGGGGUCUACUGAUGAAGGCAAU
```

---

```
>random_seq_from_cds__NO_7453 RANDOM_LENGTH 82 SEQ_LENGTH 67
  GC_CONTENT 0.402985074626866 BASEPAIR 22 FREE_ENERGY
-17.30 LEN_BP_RATIO 3.04545454545455
UAGCUUAACUUGCCACGUGGUAAAAAUGACUGGAAUGGGAGAAGUGGAUUUUCUGACAUUUGAUC
CUAUAGCUAAAAUGGCA
>random_seq_from_cds__NO_7461 RANDOM_LENGTH 71 SEQ_LENGTH 61
  GC_CONTENT 0.426229508196721 BASEPAIR 19 FREE_ENERGY
-17.30 LEN_BP_RATIO 3.21052631578947
UCUCUUCUCCUCCUGCUCAGAAUAAAGACUCCCCUUCUCCAUGAAGAAGUGAGCUUAGUUGAGA
AGAAAC
>random_seq_from_cds__NO_7465 RANDOM_LENGTH 87 SEQ_LENGTH 79
  GC_CONTENT 0.493670886075949 BASEPAIR 29 FREE_ENERGY
-20.10 LEN_BP_RATIO 2.72413793103448
GAGAGAAAACCCCGCCGCUUUGUCAUCUCCCCAUCGAGUACCAUGAUAUCUGGCAGAUGUAUA
AGAAGGCAGAGGCUUCCUUUUG
>random_seq_from_cds__NO_7476 RANDOM_LENGTH 72 SEQ_LENGTH 62
  GC_CONTENT 0.451612903225806 BASEPAIR 21 FREE_ENERGY
-16.40 LEN_BP_RATIO 2.95238095238095
AGAGGAUGGGAGUGAUGUCAAGUCCAACAGAGAAUUCUUUJACCUUGGAUGCUGACUUCUAAUCU
ACACAUU
>random_seq_from_cds__NO_7490 RANDOM_LENGTH 79 SEQ_LENGTH 62
  GC_CONTENT 0.5 BASEPAIR 22 FREE_ENERGY -19.00 LEN_BP_RATIO
2.81818181818182
AAUCCUGUCCCGGUAGCAGCAAGGGUCUUCACGAUGGCUUUGCUAUCAUUACAUUUGACUGCAUA
AAAGGGGGUGACAC
>random_seq_from_cds__NO_7503 RANDOM_LENGTH 85 SEQ_LENGTH 79
  GC_CONTENT 0.759493670886076 BASEPAIR 29 FREE_ENERGY
-38.40 LEN_BP_RATIO 2.72413793103448
AGGCUGCGGGCAGCAGGGGCGUGGCACACGGCUAGGCAGCGCUCGGCGCUCAGGCCUGCCACGCU
CAGCACCGUGGCGUAGGCGC
>random_seq_from_cds__NO_7511 RANDOM_LENGTH 77 SEQ_LENGTH 72
  GC_CONTENT 0.638888888888889 BASEPAIR 22 FREE_ENERGY
-21.20 LEN_BP_RATIO 3.27272727272727
UGCCAGCUGAAAAGGGGCUUGUGGACAGGAUGAGAGGCCUGGACCCCAGCACGCCAGCCCAAGU
GAUCGCUCCCAG
>random_seq_from_cds__NO_7520 RANDOM_LENGTH 73 SEQ_LENGTH 55
  GC_CONTENT 0.490909090909091 BASEPAIR 21 FREE_ENERGY
-18.40 LEN_BP_RATIO 2.61904761904762
CAGCAAACAAGACGGAUUCUCCUCCAGGAAAAGAGGAUAAACGAAGCCGACAUCUUGGUGCUGA
CGGCGUCU
>random_seq_from_cds__NO_7534 RANDOM_LENGTH 99 SEQ_LENGTH 86
  GC_CONTENT 0.383720930232558 BASEPAIR 29 FREE_ENERGY
-15.10 LEN_BP_RATIO 2.96551724137931
UUGAAAAGAAGCCAGAAAAGUUUAAAGUCCAGUGUUUGACAGACAUCAAAACCUGUUUUUCCCC
```

```
AACACAGAACCCUUUUUAUGCUGCUUUUGGAAACC
>random_seq_from_cds__NO_7547 RANDOM_LENGTH 81 SEQ_LENGTH 72
  GC_CONTENT 0.5972222222222222 BASEPAIR 25 FREE_ENERGY
  -21.20 LEN_BP_RATIO 2.88
GGCCAUCAUCUUGAGGGACGCCAUGUCUGCCCGGUCCACGCCACAGCAUAGAGCUCAAUACCAG
AUGCUUGGGCCCGAGC
>random_seq_from_cds__NO_7548 RANDOM_LENGTH 81 SEQ_LENGTH 66
  GC_CONTENT 0.6060606060606060 BASEPAIR 22 FREE_ENERGY
  -24.80 LEN_BP_RATIO 3
CGCCACCUCAUUCACCUGGUCCUGGGGCCUCCCAUCUGUAACAAUGAUGGCCACCUUAGGGAUGU
UAGAAGAGGGCUCUCG
>random_seq_from_cds__NO_7549 RANDOM_LENGTH 82 SEQ_LENGTH 70
  GC_CONTENT 0.6 BASEPAIR 27 FREE_ENERGY -28.10 LEN_BP_RATIO
  2.59259259259259
AGCCCCUGCCUCCACUGUGAAGGCUUCGUCCAUUGCUGUCUGGAUGGCUAGGCCUGACAUGGUGC
CUGUUGACAAGGGUGUG
>random_seq_from_cds__NO_7553 RANDOM_LENGTH 99 SEQ_LENGTH 87
  GC_CONTENT 0.839080459770115 BASEPAIR 35 FREE_ENERGY
  -57.30 LEN_BP_RATIO 2.48571428571429
GGCGGCGUCCAGGGCUGCCCCGGGACCUCGGGUCUCCAGCCUCCGGAAGCCCGGGCGGGCCACG
GGGUCGGGGCGGCGGAGGGCAGCAGCAGCAGCG
>random_seq_from_cds__NO_7554 RANDOM_LENGTH 89 SEQ_LENGTH 77
  GC_CONTENT 0.662337662337662 BASEPAIR 24 FREE_ENERGY
  -34.70 LEN_BP_RATIO 3.208333333333333
GCCAGAGCAGCAGGAGGAGUCCCGGGAGGCGGCGCGGGGGCCGGGCGCGGCAUUAUAGAGGAU
GAUAGUAAGUUCUCCUGGAGCAAG
>random_seq_from_cds__NO_7560 RANDOM_LENGTH 110 SEQ_LENGTH 96
  GC_CONTENT 0.3854166666666667 BASEPAIR 29 FREE_ENERGY
  -19.43 LEN_BP_RATIO 3.31034482758621
GGCACUGACAAUAUAUUCAGAAUGGAAGUCCUUAAGAGCAACUAACAGGUUCUUGAUCAGACUGA
CUAUCUUUUCUUAAGUUAUAUAUUCACUGUCCAGCCAACUA
>random_seq_from_cds__NO_7568 RANDOM_LENGTH 89 SEQ_LENGTH 75
  GC_CONTENT 0.4533333333333333 BASEPAIR 23 FREE_ENERGY
  -17.39 LEN_BP_RATIO 3.26086956521739
AAUUCUUGAGUAAUCUGUACCAAGCCAUAACACGUUAUCCUUGAGUCCUGGAAACUGGCUUG
GCCUCCUGAGUCAACAGUCCUG
>random_seq_from_cds__NO_7570 RANDOM_LENGTH 78 SEQ_LENGTH 60
  GC_CONTENT 0.5 BASEPAIR 20 FREE_ENERGY -18.50 LEN_BP_RATIO
  3
AAACCCACUCAGCAUUGUUCUGCAGAUUUCUUCUCAGCUUUGAAGACACUUCUCUCAGGGUGAGC
CCUGUGUGUCC
>random_seq_from_cds__NO_7571 RANDOM_LENGTH 79 SEQ_LENGTH 71
  GC_CONTENT 0.47887323943662 BASEPAIR 25 FREE_ENERGY
  -24.30 LEN_BP_RATIO 2.84
```

AGUGGUACUUGUUGACAUAUAUCAUAAGGACCCUGUGGCCUUGGGCACGUUGUCUUUCAGAGAG  
GUUAGCAAGCCAGA

>random\_seq\_from\_cds\_\_NO\_7574 RANDOM\_LENGTH 80 SEQ\_LENGTH 63  
GC\_CONTENT 0.619047619047619 BASEPAIR 25 FREE\_ENERGY  
-23.90 LEN\_BP\_RATIO 2.52

CGUCAUCUUCAUCAUAUCAUGCCCACGGUGCCUACGGCUGGGGAGGCUGCUGAGGUGGAGAUG  
CCUUUCUUGUCUUUC

>random\_seq\_from\_cds\_\_NO\_7576 RANDOM\_LENGTH 92 SEQ\_LENGTH 65  
GC\_CONTENT 0.430769230769231 BASEPAIR 26 FREE\_ENERGY  
-15.60 LEN\_BP\_RATIO 2.5

UUGCCAUCUUCUUCAUAUUCUGCACUGAAGUCACGGUGUGCAAUGUCCUUUAGUCUJAGAGGC  
UAACGUACCAUCUUCGAUUUUGUGUGU

>random\_seq\_from\_cds\_\_NO\_7586 RANDOM\_LENGTH 102 SEQ\_LENGTH 91  
GC\_CONTENT 0.428571428571429 BASEPAIR 33 FREE\_ENERGY  
-28.00 LEN\_BP\_RATIO 2.75757575757576

AAGCUCUUGUCAUAGACUGGUAGGAUGAUUUUUUGAGGAACCUUAGGUGUCCUUCUAAGGAUCC  
UGCAAUGUCAAGGUGUGCCUUUUCUUGGUCAUUGGAA

>random\_seq\_from\_cds\_\_NO\_7592 RANDOM\_LENGTH 94 SEQ\_LENGTH 66  
GC\_CONTENT 0.454545454545455 BASEPAIR 23 FREE\_ENERGY  
-18.40 LEN\_BP\_RATIO 2.8695652173913

CUGAAUAUUCGGAGAAAGAACCGAACCCUUGACAUCUCCUUUGGUAGAUGACUCAAUGGAAAAG  
UAAGAGGUGAGGCCUUUCCAAGCUAAGCUU

>random\_seq\_from\_cds\_\_NO\_7595 RANDOM\_LENGTH 110 SEQ\_LENGTH 62  
GC\_CONTENT 0.467741935483871 BASEPAIR 25 FREE\_ENERGY  
-21.72 LEN\_BP\_RATIO 2.48

UUUUUCGUGGUUAAGCUCACAGUACUGUUAUGACUACCCUCCACAAUUUGUUGCUCAGAGACAG  
AGCUGUGGCUAACUUCAAUCCCCUUUUUCUUGUCAAUUCUUGUGGU

>random\_seq\_from\_cds\_\_NO\_7612 RANDOM\_LENGTH 87 SEQ\_LENGTH 76  
GC\_CONTENT 0.5 BASEPAIR 28 FREE\_ENERGY -23.00 LEN\_BP\_RATIO  
2.71428571428571

CUGAGAAUCUGGGGAGGCCCAUJUCAUGACCCUUUCCAGAAGAAGUCCAUGCUAUGUGGCCA  
GCUUUCAACAGUGUCUUGAUCU

>random\_seq\_from\_cds\_\_NO\_7613 RANDOM\_LENGTH 84 SEQ\_LENGTH 78  
GC\_CONTENT 0.448717948717949 BASEPAIR 25 FREE\_ENERGY  
-19.50 LEN\_BP\_RATIO 3.12

CGUUGCGCAGGUCAGCCUGACUAGAGAAGUCCAGUUUGGGGAUGUCAAUUUGUGGAAGUAUUUA  
GUGUUGCUAUCCAGGGUAA

>random\_seq\_from\_cds\_\_NO\_7627 RANDOM\_LENGTH 84 SEQ\_LENGTH 63  
GC\_CONTENT 0.412698412698413 BASEPAIR 22 FREE\_ENERGY  
-16.40 LEN\_BP\_RATIO 2.86363636363636

GCCAAAGAUGCUGAACUUAAGCCUCCUGUAACCAAUUGAUGAUUAAGGUUAUUUUGGUGUCCUG  
UAGGCUUCCAGAUACACU

>random\_seq\_from\_cds\_\_NO\_7638 RANDOM\_LENGTH 92 SEQ\_LENGTH 80  
GC\_CONTENT 0.3 BASEPAIR 25 FREE\_ENERGY -15.40 LEN\_BP\_RATIO

## 3.2

CAUUAAGUUGAUUUUGGCAUCAUCUAAUGCAAUUUGUAUAUCAUUUUCUGUAAUUCUAUACUUU  
UUUGUGAGAGCAGUCAGUUUCUCCUUG

>random\_seq\_from\_cds\_\_NO\_7641 RANDOM\_LENGTH 100 SEQ\_LENGTH 67  
GC\_CONTENT 0.373134328358209 BASEPAIR 23 FREE\_ENERGY  
-19.30 LEN\_BP\_RATIO 2.91304347826087

UUGCAAGGUCUCAAAAAAUGGGAGGUUAAUGGAGUGAACAUUCUUGGUUUUUUAUCAUACUUUACAA  
AAGCAACAAUUGUAAAUCUUGGGGCUUCUCAACG

>random\_seq\_from\_cds\_\_NO\_7644 RANDOM\_LENGTH 75 SEQ\_LENGTH 59  
GC\_CONTENT 0.542372881355932 BASEPAIR 20 FREE\_ENERGY  
-21.20 LEN\_BP\_RATIO 2.95

GUUGUAAAUUGGGUCUUGAGUUUCCAGGUGCCUGUCUGCUCAGCUGGAGUAAGCAGGGCACUGA  
CUUUGUGUUC

>random\_seq\_from\_cds\_\_NO\_7673 RANDOM\_LENGTH 82 SEQ\_LENGTH 77  
GC\_CONTENT 0.558441558441558 BASEPAIR 29 FREE\_ENERGY  
-24.10 LEN\_BP\_RATIO 2.6551724137931

UCCAUUUGGAGAAGCAGUUUGGCAGGCGACCAGUGGGCGAGGAUCUCACUUCUGGCUUCUGCUUG  
CAAACGGGGUAUGGAAA

>random\_seq\_from\_cds\_\_NO\_7677 RANDOM\_LENGTH 90 SEQ\_LENGTH 78  
GC\_CONTENT 0.525641025641026 BASEPAIR 22 FREE\_ENERGY  
-22.87 LEN\_BP\_RATIO 3.54545454545455

UGCUCGCACCCUUCUGCUUGAGUUACAAACUUCAGGGUAUCCACCAAGGCUCUGUCCUCUCUCU  
GGAGCUCAUAGGUUGCGCUGACAGA

>random\_seq\_from\_cds\_\_NO\_7683 RANDOM\_LENGTH 75 SEQ\_LENGTH 63  
GC\_CONTENT 0.53968253968254 BASEPAIR 20 FREE\_ENERGY  
-17.30 LEN\_BP\_RATIO 3.15

CUUGGCUCCGGGAGCAAUGACUCCAGAUGAAGAUUUUGCAACUGUAAUCCAGCUCAGUGGGGA  
GUUCAAGGC

>random\_seq\_from\_cds\_\_NO\_7690 RANDOM\_LENGTH 83 SEQ\_LENGTH 68  
GC\_CONTENT 0.352941176470588 BASEPAIR 27 FREE\_ENERGY  
-16.70 LEN\_BP\_RATIO 2.51851851851852

UAUUUGGAUCAAAUUAUAAGAUUCCUUCUAUUUUGGCUGAGGCUGGGUCAAGUGAUGGAAGAGAA  
ACAGAUUUGUAGAGUUGA

>random\_seq\_from\_cds\_\_NO\_7694 RANDOM\_LENGTH 81 SEQ\_LENGTH 68  
GC\_CONTENT 0.529411764705882 BASEPAIR 25 FREE\_ENERGY  
-22.10 LEN\_BP\_RATIO 2.72

UCUGAAGAAGAACCUCUGGUCCUUGUCUUUAGGCUCCAUUUCCGCAGAGCCUGGAUGGCAGC  
UUUCUGGAUCAUCAGU

>random\_seq\_from\_cds\_\_NO\_7695 RANDOM\_LENGTH 85 SEQ\_LENGTH 66  
GC\_CONTENT 0.454545454545455 BASEPAIR 25 FREE\_ENERGY  
-21.70 LEN\_BP\_RATIO 2.64

GAUGGCUUUGUACUUUGGACACAUUUCAGGAUUGAAGACUUGAGUUCUGGAGUUAACUGCUCCAU  
GGUUUGGCCCAUAAUUUCCAA

>random\_seq\_from\_cds\_\_NO\_7709 RANDOM\_LENGTH 70 SEQ\_LENGTH 55

---

```
GC_CONTENT    0.581818181818182    BASEPAIR    23    FREE_ENERGY
-31.70    LEN_BP_RATIO    2.39130434782609
CUGGCUGGUCUUCAGGAUGAAGCUGCAGAGCUGGGGAACCUCCAGCUCAACCCUUGCAGUUGAUC
CUGGU
>random_seq_from_cds__NO_7711    RANDOM_LENGTH    80    SEQ_LENGTH    61
GC_CONTENT    0.655737704918033    BASEPAIR    19    FREE_ENERGY
-21.80    LEN_BP_RATIO    3.21052631578947
GUGCUUGAAUCGGGUCGCAUCUUCUUGGACAGACCAGGCUGACAUUUUCCAGCAUUUCCUCUUC
GGCCUGGCGCCCGC
>random_seq_from_cds__NO_7713    RANDOM_LENGTH    67    SEQ_LENGTH    55
GC_CONTENT    0.563636363636364    BASEPAIR    19    FREE_ENERGY
-21.70    LEN_BP_RATIO    2.89473684210526
UGACAGAGGGGCCAUUGGGGAAGGUGGCUAGCUUAUCCCCGCCCCUUCAGAAGAAGGUCAGCAGC
UC
>random_seq_from_cds__NO_7719    RANDOM_LENGTH    67    SEQ_LENGTH    60
GC_CONTENT    0.416666666666667    BASEPAIR    22    FREE_ENERGY
-17.00    LEN_BP_RATIO    2.72727272727273
GAUUUCAUUGAGGAAACGCAGACACUCAAUACCACCAUUGUUGAUGCUCUCCUCUGUGUAGAAGU
CA
>random_seq_from_cds__NO_7730    RANDOM_LENGTH    70    SEQ_LENGTH    58
GC_CONTENT    0.637931034482759    BASEPAIR    22    FREE_ENERGY
-21.60    LEN_BP_RATIO    2.63636363636364
CCAGGGCCGUGCAGAGCAGGACGACGCAGGAGCAGCUGAAGGCAGCCCCACUCUGCUUCUCCUUC
UCCAC
>random_seq_from_cds__NO_7733    RANDOM_LENGTH    82    SEQ_LENGTH    68
GC_CONTENT    0.676470588235294    BASEPAIR    24    FREE_ENERGY
-33.10    LEN_BP_RATIO    2.83333333333333
GCGCAGCCUCCGCGUGGGUUGGGGAUGAGGGUUGUCGGCCUGGGCAUCCUGCUCUCCUGGGC
UUCUCCGACGUGGACCC
>random_seq_from_cds__NO_7734    RANDOM_LENGTH    71    SEQ_LENGTH    55
GC_CONTENT    0.636363636363636    BASEPAIR    20    FREE_ENERGY
-26.90    LEN_BP_RATIO    2.75
ACUGCUGUGGGCACUCCCGUUGGGCUCCUUGGUCUCAAUUGAGGGCAGGGGAGCUGGACUUUGAGG
AAGCUG
>random_seq_from_cds__NO_7742    RANDOM_LENGTH    78    SEQ_LENGTH    66
GC_CONTENT    0.575757575757576    BASEPAIR    19    FREE_ENERGY
-16.20    LEN_BP_RATIO    3.47368421052632
GAACUGCUGCUGGUCCUUCUGGCUCUCGUCUUUCUUAUGUCUUUCAGCAUCUCGUCAGCCACGU
GCUUGGGCAGGAU
>random_seq_from_cds__NO_7744    RANDOM_LENGTH    89    SEQ_LENGTH    71
GC_CONTENT    0.619718309859155    BASEPAIR    21    FREE_ENERGY
-18.90    LEN_BP_RATIO    3.38095238095238
GUAGUAGGACAUGAUGCCCACAGCGAUGGCGCACAGGUAGAGGAAGACGUUGGCCAGGAUCCUCC
CGCAGCAGCUGCAUCCCUUGAGC
```

---

```
>random_seq_from_cds__NO_7750 RANDOM_LENGTH 72 SEQ_LENGTH 57
  GC_CONTENT 0.614035087719298 BASEPAIR 20 FREE_ENERGY
  -20.80 LEN_BP_RATIO 2.85
CAGCACCAGCAGGGUCUCGUGGCGCUGCCUUUUGAAGUAGGUCUGGUAGAGGUUCUCCAAGGACU
CCGGCAC
>random_seq_from_cds__NO_7764 RANDOM_LENGTH 71 SEQ_LENGTH 52
  GC_CONTENT 0.596153846153846 BASEPAIR 20 FREE_ENERGY
  -17.80 LEN_BP_RATIO 2.6
UGCACUCCAGUCCAUGUGCUCGUGCCUGUGGUACAAGAGCCGCGAGAAGCUGCAGUACUCCAUC
CCCAUG
>random_seq_from_cds__NO_7767 RANDOM_LENGTH 75 SEQ_LENGTH 58
  GC_CONTENT 0.827586206896552 BASEPAIR 21 FREE_ENERGY
  -30.60 LEN_BP_RATIO 2.76190476190476
CGUGUGACAUGGGCCCGCGCCGCGGAGCCGAAAGCCCGAGGCCCGGAGGAGGCGCAGCCCGAGC
CCGACCCCGA
>random_seq_from_cds__NO_7839 RANDOM_LENGTH 84 SEQ_LENGTH 72
  GC_CONTENT 0.666666666666667 BASEPAIR 25 FREE_ENERGY
  -27.70 LEN_BP_RATIO 2.88
UCGGAGGAAGGACUUGAGGUCUCCCCCGCAUGAGCUCCAGCAGGAUGAACCGGGGCAGGGAUU
GCAGGCUCACCCCAUGCA
>random_seq_from_cds__NO_7843 RANDOM_LENGTH 72 SEQ_LENGTH 56
  GC_CONTENT 0.607142857142857 BASEPAIR 22 FREE_ENERGY
  -23.60 LEN_BP_RATIO 2.54545454545455
CAGCUUGUACUCAGGGCUCUGCAGCUCCAUCUGCAUGGCUUGCAGCUCCUGGUGCUUCCGGCGGU
ACACCAA
>random_seq_from_cds__NO_7845 RANDOM_LENGTH 84 SEQ_LENGTH 60
  GC_CONTENT 0.666666666666667 BASEPAIR 19 FREE_ENERGY
  -28.30 LEN_BP_RATIO 3.15789473684211
GUGGCUCGCGGGUGGGUGACACCAAUGCAGGAGACGCCAUCCUCAGCCAGCACCGUCCGUGGUC
ACAGAAGCAGAUGACCUUG
>random_seq_from_cds__NO_7864 RANDOM_LENGTH 72 SEQ_LENGTH 56
  GC_CONTENT 0.571428571428571 BASEPAIR 19 FREE_ENERGY
  -18.40 LEN_BP_RATIO 2.94736842105263
AGUCCUGGUGGAAGUCACAGGCCUGCCCAAGCUGGAGGACUGUCCCAUCCAACAAGUGAAGGAG
CUCUGCA
>random_seq_from_cds__NO_7866 RANDOM_LENGTH 85 SEQ_LENGTH 66
  GC_CONTENT 0.545454545454545 BASEPAIR 25 FREE_ENERGY
  -27.70 LEN_BP_RATIO 2.64
UCCACUGGAGAUGUAUCCAGGGCCACUCGAAAUGGGUUGUCUGGACGCCCGAUUCUCCUGGA
GCACUGUCCAACCCAUGCUU
>random_seq_from_cds__NO_7869 RANDOM_LENGTH 81 SEQ_LENGTH 72
  GC_CONTENT 0.597222222222222 BASEPAIR 27 FREE_ENERGY
  -31.00 LEN_BP_RATIO 2.66666666666667
UGCUUGGAGUCAGCUGAGGUGUUGAGAAGGAGAAAGGAGCCUCUGGGCAUCUCCUAGAACGCU
```

```
CUGCCCCAGGCCCAUC
>random_seq_from_cds__NO_7873 RANDOM_LENGTH 86 SEQ_LENGTH 76
  GC_CONTENT 0.671052631578947 BASEPAIR 27 FREE_ENERGY
  -36.00 LEN_BP_RATIO 2.81481481481481
CCCGAAGAUCUGGAAGAGAAGGCGGGGCGUGGGAGGCGCGAAUUGCCGCGGACAGCCUCCUCUC
UGCCCACUCCGACGCCUUCU
>random_seq_from_cds__NO_7881 RANDOM_LENGTH 84 SEQ_LENGTH 70
  GC_CONTENT 0.528571428571429 BASEPAIR 29 FREE_ENERGY
  -26.20 LEN_BP_RATIO 2.41379310344828
AGGGUUUGCAGUUUUCUGGGACACCAGUGACACACCAGGGUGGUGAACUUGUCCACGCAGGCAUU
GCGGAUCUUCUCCGGGGUG
>random_seq_from_cds__NO_7890 RANDOM_LENGTH 78 SEQ_LENGTH 69
  GC_CONTENT 0.623188405797101 BASEPAIR 23 FREE_ENERGY
  -23.10 LEN_BP_RATIO 3
GAGCUCUACUGGCCACCCUGGACCAUUUUGGUAUGAAGGCCUUGGCCCAUCUCAGUCCCCCGUG
GGUCAGCAGCACA
>random_seq_from_cds__NO_7893 RANDOM_LENGTH 71 SEQ_LENGTH 60
  GC_CONTENT 0.533333333333333 BASEPAIR 24 FREE_ENERGY
  -21.60 LEN_BP_RATIO 2.5
GAUACUGAGAGCUUGCUAGGCAUUCUCCAGCAUCUGGGCAAGGUGAAACCCUCAAGCUUCUGG
UUGAAG
>random_seq_from_cds__NO_7901 RANDOM_LENGTH 96 SEQ_LENGTH 89
  GC_CONTENT 0.49438202247191 BASEPAIR 32 FREE_ENERGY
  -21.80 LEN_BP_RATIO 2.78125
UUGGAACAGCAAUGGUGCAGUGAGUCUCCAGGUAGAAGUGCUCUUGGCCACCGAUGUAUAUCUCC
CCCUGACACAACAUUAUCUGCUUCGGAAAAC
>random_seq_from_cds__NO_7929 RANDOM_LENGTH 66 SEQ_LENGTH 49
  GC_CONTENT 0.387755102040816 BASEPAIR 19 FREE_ENERGY
  -15.50 LEN_BP_RATIO 2.57894736842105
UUUUUUUCUAUAAGGAAUGACUGUAGUCAAAUACUGUGCCGGGCAUAUGACUUCUCUCAUUCU
C
>random_seq_from_cds__NO_7932 RANDOM_LENGTH 89 SEQ_LENGTH 59
  GC_CONTENT 0.457627118644068 BASEPAIR 20 FREE_ENERGY
  -15.66 LEN_BP_RATIO 2.95
GCACCAGCUCCUCAGAGUACUCCUUAUGGCAGUCUCAAUUUCUCCAGGAUUUCAUUUAACUCA
GACACUGAGAGCCUUUUCACUCCU
>random_seq_from_cds__NO_7933 RANDOM_LENGTH 87 SEQ_LENGTH 74
  GC_CONTENT 0.445945945945946 BASEPAIR 25 FREE_ENERGY
  -15.10 LEN_BP_RATIO 2.96
CUCUUCAUAACUGCCGGUACUAGACCUCUUGAGAGUUUGAAUUUCCUGGGAAAGCAUUGAAAGCC
GAUCUGACUGUGUAGGGGUUC
>random_seq_from_cds__NO_7934 RANDOM_LENGTH 109 SEQ_LENGTH 93
  GC_CONTENT 0.451612903225806 BASEPAIR 29 FREE_ENERGY
  -24.42 LEN_BP_RATIO 3.20689655172414
```



---

AUCAUCUUCUGGGUCCGGUGAUUCCUGCAUCAUUUCUUCAAUUCUUCAAUAACCCUGGUCUGCC  
GUGAAGAGGGGUUCAUCAUUAACACAGGAGACGAUGAUUGAGUG

>random\_seq\_from\_cds\_\_NO\_7948 RANDOM\_LENGTH 94 SEQ\_LENGTH 85  
GC\_CONTENT 0.588235294117647 BASEPAIR 32 FREE\_ENERGY  
-27.60 LEN\_BP\_RATIO 2.65625

GGGGGGCGGCCCGGGCCGAAGGCUUUCGCAGUGCCUCAAGAACUUGUCCAGGAUGAAGUUGCUG  
AAGUUGCGGUUGAGCUGCUCGAAUUCGCG

>random\_seq\_from\_cds\_\_NO\_7951 RANDOM\_LENGTH 95 SEQ\_LENGTH 89  
GC\_CONTENT 0.786516853932584 BASEPAIR 34 FREE\_ENERGY  
-47.50 LEN\_BP\_RATIO 2.61764705882353

GGGCCGUCGCGCUGCCGCGCACCAGCAGCGCCACCAGCUCGCGCGCCUCGCUCAGCACGUGGC  
CCUCGAGGACUUGGCGGCUGCGCGGCUGGC

>random\_seq\_from\_cds\_\_NO\_7955 RANDOM\_LENGTH 80 SEQ\_LENGTH 65  
GC\_CONTENT 0.815384615384615 BASEPAIR 22 FREE\_ENERGY  
-36.50 LEN\_BP\_RATIO 2.95454545454545

CCGCCUGGCCACCGCCGCGCGUUCGCAUCAGUGGCCACGCAAACGGGCCCGGGGGCGCGGAC  
CGGAGCUGCCGCCUC

>random\_seq\_from\_cds\_\_NO\_7958 RANDOM\_LENGTH 88 SEQ\_LENGTH 79  
GC\_CONTENT 0.721518987341772 BASEPAIR 28 FREE\_ENERGY  
-37.60 LEN\_BP\_RATIO 2.82142857142857

GCAGGCGGCGCCAGGGUCGAGGCUGGGAGACUCAGAGCCGCUGAGGCUGCCGAGCUCAGGGAG  
CCGCUUAGGUAGCUGUCGCGGUC

>random\_seq\_from\_cds\_\_NO\_7963 RANDOM\_LENGTH 80 SEQ\_LENGTH 68  
GC\_CONTENT 0.838235294117647 BASEPAIR 24 FREE\_ENERGY  
-47.60 LEN\_BP\_RATIO 2.83333333333333

GUCCUCGGCGCCCCCGGUGCCGUACAGCAGAGCGGCCGAGCCGCGGCCGCGCGGAGGCGCAGC  
AUGUCGGGGCGCCCCG

>random\_seq\_from\_cds\_\_NO\_7969 RANDOM\_LENGTH 71 SEQ\_LENGTH 57  
GC\_CONTENT 0.684210526315789 BASEPAIR 19 FREE\_ENERGY  
-23.30 LEN\_BP\_RATIO 3

GAAGGGCCGGCACAGCUCGGUCUUGUAGCGGUGGAGUUGAUCUGGGAGCCGCCGCCCCCUUCU  
GCUGCU

>random\_seq\_from\_cds\_\_NO\_7976 RANDOM\_LENGTH 85 SEQ\_LENGTH 79  
GC\_CONTENT 0.417721518987342 BASEPAIR 26 FREE\_ENERGY  
-22.40 LEN\_BP\_RATIO 3.03846153846154

UGGGCAGGUUUUCUCAAUGAAUUGAAUCCUUGAGUGAAGGCACACAUUGGAUUAGUUGUCACAG  
AAACAUUUGAGCUGCCACA

>random\_seq\_from\_cds\_\_NO\_7986 RANDOM\_LENGTH 98 SEQ\_LENGTH 89  
GC\_CONTENT 0.393258426966292 BASEPAIR 31 FREE\_ENERGY  
-17.80 LEN\_BP\_RATIO 2.87096774193548

UUCAAAGUUUUAUGACAAAUUGCUGAUUUUCUUGUAGGCAGAUUCUAUCAUCUGGACUCUCUUGA  
GGUUUCUAUUUCCCGUUCUUGCUUUGGGUAUC

>random\_seq\_from\_cds\_\_NO\_7997 RANDOM\_LENGTH 89 SEQ\_LENGTH 76  
GC\_CONTENT 0.605263157894737 BASEPAIR 26 FREE\_ENERGY

---

-31.20 LEN\_BP\_RATIO 2.92307692307692  
GGAGCUCUGGGAGCCUCUGUUUACUUGGAGACCCAUGGACCCUCCGGGGGUCAAAGAUGAGAGGU  
CACCCAUCAUGGCGCCCCCGCAGG  
>random\_seq\_from\_cds\_\_NO\_7998 RANDOM\_LENGTH 78 SEQ\_LENGTH 70  
GC\_CONTENT 0.614285714285714 BASEPAIR 25 FREE\_ENERGY  
-27.10 LEN\_BP\_RATIO 2.8  
UCCUCGCGUUCGGGCUUCUGCUUGCCGCGGCGACGGCGACUUUUGCCGCGAGCUCAGGAAGGAAUG  
UGUCUGUGAAAAC  
>random\_seq\_from\_cds\_\_NO\_8009 RANDOM\_LENGTH 71 SEQ\_LENGTH 52  
GC\_CONTENT 0.673076923076923 BASEPAIR 21 FREE\_ENERGY  
-24.60 LEN\_BP\_RATIO 2.47619047619048  
AGGAGACGCGCAGUUGGAGAGCGCGGCCGAGGUCGGCUUCGUGCGCUUCUUUCAGGGCAUGCCG  
GAGAAG  
>random\_seq\_from\_cds\_\_NO\_8034 RANDOM\_LENGTH 81 SEQ\_LENGTH 66  
GC\_CONTENT 0.5303030303030303 BASEPAIR 21 FREE\_ENERGY  
-23.04 LEN\_BP\_RATIO 3.14285714285714  
GUCAGCAGAAGUGUCCAUGUGGACUGCAUCUUAGCCCGAGUAGGGGCUUGGUGACAGUCAAUUGA  
AAGGAGUCUCCACGUU  
>random\_seq\_from\_cds\_\_NO\_8038 RANDOM\_LENGTH 110 SEQ\_LENGTH 92  
GC\_CONTENT 0.402173913043478 BASEPAIR 30 FREE\_ENERGY  
-24.42 LEN\_BP\_RATIO 3.06666666666667  
UAACUAUGCUUUUAUCAGGUGAAGAAAGGGUGUCUGUGAUCAAAGUUUUGGGAUUCAUGUUGCAGA  
GCUUGCUAAUUUCCUAAGCAUGUAAUAGAGUGUCUAAAACAGAA  
>random\_seq\_from\_cds\_\_NO\_8049 RANDOM\_LENGTH 94 SEQ\_LENGTH 81  
GC\_CONTENT 0.802469135802469 BASEPAIR 32 FREE\_ENERGY  
-48.10 LEN\_BP\_RATIO 2.53125  
GGUACACCGAGGGCUUCCAGCCCGCCAGGCUGUCGGCCUCCGAGAGCGCGGAGCCGCGGCGGAAG  
GUGGCGGGCAGCAGGCCGUGCGGCGCAG  
>random\_seq\_from\_cds\_\_NO\_8051 RANDOM\_LENGTH 69 SEQ\_LENGTH 57  
GC\_CONTENT 0.666666666666667 BASEPAIR 22 FREE\_ENERGY  
-29.50 LEN\_BP\_RATIO 2.59090909090909  
AGCCCGUAGGCGAUGAGGAAGCCUUCGCCACCGUCGCGGGGUGGUCAUGCCGAAACCCUA  
UGGU  
>random\_seq\_from\_cds\_\_NO\_8076 RANDOM\_LENGTH 86 SEQ\_LENGTH 77  
GC\_CONTENT 0.467532467532468 BASEPAIR 24 FREE\_ENERGY  
-20.50 LEN\_BP\_RATIO 3.20833333333333  
UGCCGGUUUGAGCUGAUGCGUUUCAAGACUUUGUAUAAUGGGGAUAAUCUUCUUUCCUUGAA  
GUCUGUAGUGGUUGUCCAGGG  
>random\_seq\_from\_cds\_\_NO\_8079 RANDOM\_LENGTH 63 SEQ\_LENGTH 46  
GC\_CONTENT 0.434782608695652 BASEPAIR 19 FREE\_ENERGY  
-19.20 LEN\_BP\_RATIO 2.42105263157895  
UGUCUGGGGAGUUUACAGGAACUUGAAUCUGAACCCUGUCAUUAAGUCACUGUGGGGUCAGCA  
>random\_seq\_from\_cds\_\_NO\_8096 RANDOM\_LENGTH 110 SEQ\_LENGTH 98  
GC\_CONTENT 0.418367346938776 BASEPAIR 31 FREE\_ENERGY

---

-21.50 LEN\_BP\_RATIO 3.16129032258065  
GAAGGUACCUGAAGAAGAAGCUGACAGUAUUUCAAAUGAGGAUUCAGCCACAAACAGUAGUGAUA  
AUGAAGACCCUCAAGUAAACAUUGUAGAAGAGGGACCCUUUAAA  
>random\_seq\_from\_cds\_\_NO\_8115 RANDOM\_LENGTH 110 SEQ\_LENGTH 84  
GC\_CONTENT 0.357142857142857 BASEPAIR 27 FREE\_ENERGY  
-19.02 LEN\_BP\_RATIO 3.11111111111111  
AAAUUGUGGACAACUUUUGGGGUAAGUCACAAAAGAAGGAAAUUUGUUGAAAGUGCUGUGAUA  
ACUCAAAUUUAUUGCCUCUGCUUUGUGAAUGGGAACCCUGGAAUGC  
>random\_seq\_from\_cds\_\_NO\_8134 RANDOM\_LENGTH 82 SEQ\_LENGTH 68  
GC\_CONTENT 0.426470588235294 BASEPAIR 24 FREE\_ENERGY  
-19.00 LEN\_BP\_RATIO 2.83333333333333  
GCAUAAUCAGAAUGGCAUGUCUAAUCGCAGCUUUGGUCCAGGUGAAUAGCAUAGGUGAUGGUG  
UGCCAUCUUUCUAGAGU  
>random\_seq\_from\_cds\_\_NO\_8143 RANDOM\_LENGTH 70 SEQ\_LENGTH 54  
GC\_CONTENT 0.592592592592593 BASEPAIR 19 FREE\_ENERGY  
-23.70 LEN\_BP\_RATIO 2.84210526315789  
CCAUAGCUCGGCAGGGCCUGCAAUUUGGUGGAAGAAAUAUCCCAAGGUUUUCGGCCUGUGGCC  
CACGG  
>random\_seq\_from\_cds\_\_NO\_8150 RANDOM\_LENGTH 67 SEQ\_LENGTH 51  
GC\_CONTENT 0.823529411764706 BASEPAIR 19 FREE\_ENERGY  
-29.40 LEN\_BP\_RATIO 2.68421052631579  
CAGCGCAGGGCGCCGUCGGGCACGCAGUUGCAGGGCUCAGGGCAGAGCGCCUCGCGCAGCGCUCG  
UG  
>random\_seq\_from\_cds\_\_NO\_8151 RANDOM\_LENGTH 70 SEQ\_LENGTH 55  
GC\_CONTENT 0.727272727272727 BASEPAIR 22 FREE\_ENERGY  
-33.20 LEN\_BP\_RATIO 2.5  
GCAGCGGCGGCGUCGAGCAGCAGCAGCAGCUUCAGCAGCUGCAGCGCCGAGAACCGCUGCUUCAUC  
AUGUC  
>random\_seq\_from\_cds\_\_NO\_8197 RANDOM\_LENGTH 86 SEQ\_LENGTH 50  
GC\_CONTENT 0.56 BASEPAIR 19 FREE\_ENERGY -18.38  
LEN\_BP\_RATIO 2.63157894736842  
GAGAACUGCAUCCAACAGAGGGGAACAAAUUUCAGCGACCCAUCUGUGGAUCAUUGGAUCGG  
CUCACCCAACCAGAUUAUAAC  
>random\_seq\_from\_cds\_\_NO\_8201 RANDOM\_LENGTH 77 SEQ\_LENGTH 52  
GC\_CONTENT 0.346153846153846 BASEPAIR 19 FREE\_ENERGY  
-16.50 LEN\_BP\_RATIO 2.73684210526316  
AUUAUACUAUCCACACUUGAUUAGGGAGUAACAUGUACUUUUCUAUCAAGUGUUCUUGUACUGU  
UUGAUCUGUUUG  
>random\_seq\_from\_cds\_\_NO\_8237 RANDOM\_LENGTH 87 SEQ\_LENGTH 70  
GC\_CONTENT 0.485714285714286 BASEPAIR 22 FREE\_ENERGY  
-17.50 LEN\_BP\_RATIO 3.18181818181818  
UUCCCCUCCUGAAAGGAUGUCAUCGCAACAGAUAAAGAAGACGUUGCCUCAAAGACCUGGAUGU  
GGCCAUCUUGUGGGCUCCAUG  
>random\_seq\_from\_cds\_\_NO\_8247 RANDOM\_LENGTH 82 SEQ\_LENGTH 64

---

```
GC_CONTENT    0.515625  BASEPAIR   23  FREE_ENERGY   -22.40
LEN_BP_RATIO  2.78260869565217
AGCCAGCAACUGUAAAGGGAUCACGCUGAGAAUGCCCUGCAAGCAGUCCACUGAGUGGGGCACCU
UGAUCGUUCUUUUUGUG
>random_seq_from_cds__NO_8258  RANDOM_LENGTH 97  SEQ_LENGTH    78
GC_CONTENT    0.512820512820513  BASEPAIR   28  FREE_ENERGY
-26.61  LEN_BP_RATIO  2.78571428571429
GCCCCUUAUGAUCUGCUGGAGUCCAUCUGGAGUUUUGCACAGCUCGUCGGGGUGAUCUCCU
GCAGUUCGUUUAAUUCGAUGGAUAGAAAGACG
>random_seq_from_cds__NO_8264  RANDOM_LENGTH 90  SEQ_LENGTH    74
GC_CONTENT    0.364864864864865  BASEPAIR   26  FREE_ENERGY
-15.60  LEN_BP_RATIO  2.84615384615385
GUUUCAGAUUCGAAGUCAUAGCCUUUGCUUUCCAAAAACUUUUUCAAGUCUUUGUAGUUGGUGA
UGAUUCCAUGUGAAUAACGAUAAA
>random_seq_from_cds__NO_8265  RANDOM_LENGTH 78  SEQ_LENGTH    60
GC_CONTENT    0.566666666666667  BASEPAIR   20  FREE_ENERGY
-18.60  LEN_BP_RATIO  3
UUCCAUAUUUUUAUCAGAGCGCUGGGGGUGGCUAUUGACAGGACUGGGUUCUCCAUGUGUUGCC
CAACGGGUAUGAG
>random_seq_from_cds__NO_8293  RANDOM_LENGTH 83  SEQ_LENGTH    72
GC_CONTENT    0.652777777777778  BASEPAIR   23  FREE_ENERGY
-29.60  LEN_BP_RATIO  3.1304347826087
CUCCGAGGCCUUUGCCACCUCCAACAUCUGCGGCUGCUGGAGCAGGGCCGGCUGCUCUCUGUGC
CCAGGGCCCUAGCCUCC
>random_seq_from_cds__NO_8298  RANDOM_LENGTH 85  SEQ_LENGTH    71
GC_CONTENT    0.577464788732394  BASEPAIR   22  FREE_ENERGY
-21.96  LEN_BP_RATIO  3.22727272727273
CCGAGAACAUCAGCAGGCGGUCACCCGAAACUACAUCACCCACCCCGUGUCAGCCUACAGGACU
GUGUGCAGCGUGAACGGGCC
>random_seq_from_cds__NO_8300  RANDOM_LENGTH 87  SEQ_LENGTH    74
GC_CONTENT    0.554054054054054  BASEPAIR   29  FREE_ENERGY
-26.10  LEN_BP_RATIO  2.55172413793103
UGCUUGAGGUGGCUGGCACCAAGGCGAUUGUUCAGGGUGUUUGAAGGGACAUCAGGGAUUCGAUGC
CAGGAAGACCACUUGCGAAUUU
>random_seq_from_cds__NO_8375  RANDOM_LENGTH 89  SEQ_LENGTH    68
GC_CONTENT    0.338235294117647  BASEPAIR   26  FREE_ENERGY
-16.60  LEN_BP_RATIO  2.61538461538462
GCCCGAAGACCCUUCUACUUAGUUACUGUAGAUGAAAUACAAGAUGACAGCAGUGAUUUGCAUU
UAGUGACUUUGGAUGAAGUAACUG
>random_seq_from_cds__NO_8376  RANDOM_LENGTH 110  SEQ_LENGTH    59
GC_CONTENT    0.355932203389831  BASEPAIR   20  FREE_ENERGY
-16.80  LEN_BP_RATIO  2.95
AAGAGGAUGAAGACUCUCUGGCGGAUUUUACAACCUAAAAGAAGAGCUAAUUUUUGUACUGUU
GAUGAAGUUGGAGAGGAGGAAGAUGGAGAUAAUGAUUUAAAAGUU
```

---

```
>random_seq_from_cds__NO_8403 RANDOM_LENGTH 99 SEQ_LENGTH 81
  GC_CONTENT 0.604938271604938 BASEPAIR 26 FREE_ENERGY
-28.00 LEN_BP_RATIO 3.11538461538462
AGUCCAGAGAGUUCACAGGCUUCCAGACCCCUACACAGAGCUCAACACAGGCAAGGGGGGAAG
GUGUGGCUUAUCGUGGCCGGCUUCUGCUCUCCCU
>random_seq_from_cds__NO_8409 RANDOM_LENGTH 73 SEQ_LENGTH 66
  GC_CONTENT 0.636363636363636 BASEPAIR 23 FREE_ENERGY
-15.40 LEN_BP_RATIO 2.8695652173913
ACCAGUACCUGUACCAGCUGCGCACCCAUCACCUGAGCCAAAUCACUGAGGCUGCCCUGGCCUG
AAGCUCGG
>random_seq_from_cds__NO_8414 RANDOM_LENGTH 85 SEQ_LENGTH 69
  GC_CONTENT 0.492753623188406 BASEPAIR 26 FREE_ENERGY
-21.50 LEN_BP_RATIO 2.65384615384615
AGUUUGCUGAGGGGAAGCUGUCUGUCUUUGCUGAAACCGUAUGAGAACGAGACUAAGUUGGCCCU
UGUUGGGAACUGGGGCACAA
>random_seq_from_cds__NO_8425 RANDOM_LENGTH 78 SEQ_LENGTH 58
  GC_CONTENT 0.603448275862069 BASEPAIR 19 FREE_ENERGY
-16.30 LEN_BP_RATIO 3.05263157894737
GAACACCCUUAACCCCACCGGGACCAGACGCUCAUCUUCUACGAGAUCGAGAUCUUUGGCGAGC
CGGCCACAGUUGC
>random_seq_from_cds__NO_8435 RANDOM_LENGTH 88 SEQ_LENGTH 69
  GC_CONTENT 0.565217391304348 BASEPAIR 25 FREE_ENERGY
-32.60 LEN_BP_RATIO 2.76
AGCCCCUCAUCCCAUCCAGGGAGGAAGAGUUAUCGAUUGGUGGAGCAAUUCUUUGCCUCCAU
AGGGGAGAGGGAAAAGUGCGGCU
>random_seq_from_cds__NO_8436 RANDOM_LENGTH 97 SEQ_LENGTH 81
  GC_CONTENT 0.493827160493827 BASEPAIR 28 FREE_ENERGY
-28.90 LEN_BP_RATIO 2.89285714285714
CCUACCUGGAGAAGGAUUUUGACACCCUGAAGGGUCUAUGACACACAGCUGGAGAAUGUGGAGGC
CUUUGAGGGCCUGUCUGACUUUUGUAACACCU
>random_seq_from_cds__NO_8438 RANDOM_LENGTH 85 SEQ_LENGTH 67
  GC_CONTENT 0.671641791044776 BASEPAIR 19 FREE_ENERGY
-21.20 LEN_BP_RATIO 3.52631578947368
UCCCGAAGACCCAGCCAUCCCAUGCCCCAAGACAGUUCACCAGCUGGCCGCCAGGGACCC
CAGGAGUGCUUGGUCCGUAU
>random_seq_from_cds__NO_8445 RANDOM_LENGTH 110 SEQ_LENGTH 94
  GC_CONTENT 0.680851063829787 BASEPAIR 35 FREE_ENERGY
-51.32 LEN_BP_RATIO 2.68571428571429
CUGGUCCCGGAGCACGUGGAGUCACGGCCCCUCUACAGCCCCUGCAGCCAGACAUCGAGCAGGG
GGAAGCUGCAGAUGUGGGUCGACCUAUUUCCGAAGGCCCUUGGGGC
>random_seq_from_cds__NO_8473 RANDOM_LENGTH 86 SEQ_LENGTH 72
  GC_CONTENT 0.472222222222222 BASEPAIR 22 FREE_ENERGY
-20.40 LEN_BP_RATIO 3.27272727272727
AAUGUUGAGGAUGUCUCCUGACACUGUGCCAAAGGCUCCUAAACAUUUAAAAGCAGGGAGACACU
```

---

```
UCUAAAAGGAGGCAUAGCUAAA
>random_seq_from_cds__NO_8500 RANDOM_LENGTH 88 SEQ_LENGTH 71
  GC_CONTENT 0.492957746478873 BASEPAIR 24 FREE_ENERGY
  -20.60 LEN_BP_RATIO 2.958333333333333
ACCUGAAGAGGCACAGAAAGUUUCACCUUUCUUGGACCAGCUGACCAGAAGACUGGGACACCAA
CUCCAACCUCUGCUUCUACUCA
>random_seq_from_cds__NO_8509 RANDOM_LENGTH 73 SEQ_LENGTH 48
  GC_CONTENT 0.5 BASEPAIR 20 FREE_ENERGY -19.30 LEN_BP_RATIO
  2.4
CUGUAACCUCCCCUCCAGCUCAUUUGGAGAGAAGCCCAUUGUUAUCUACAAACAGGCCUUUCCA
GAGGGUCA
>random_seq_from_cds__NO_8565 RANDOM_LENGTH 110 SEQ_LENGTH 89
  GC_CONTENT 0.438202247191011 BASEPAIR 28 FREE_ENERGY
  -19.40 LEN_BP_RATIO 3.17857142857143
AAAUACAAGUGAACAUUUCAGAUUUCGAAGGACAUUCCAAUCCAGAGGGGACCCAGUAUUUGCA
GAUCGGAUUACCAGAGAAGAUGAAGACCCACUUUCUGCUUUCUC
>random_seq_from_cds__NO_8582 RANDOM_LENGTH 110 SEQ_LENGTH 75
  GC_CONTENT 0.466666666666667 BASEPAIR 27 FREE_ENERGY
  -23.20 LEN_BP_RATIO 2.777777777777778
UUUCUCAGAAUCCAAUCACACAUCUCUCCAGGUCUCAGAAAGUACACAUGAUGAUAGCAGAGGG
GAACGAAGUGUGAAGGAAUGGAGUGGUAGACAACAGCAGAGAAAU
>random_seq_from_cds__NO_8593 RANDOM_LENGTH 80 SEQ_LENGTH 57
  GC_CONTENT 0.385964912280702 BASEPAIR 19 FREE_ENERGY
  -16.10 LEN_BP_RATIO 3
UGAGGACAGAAAGUUAAAAAAGAACAAGAAGAAUCCCAUGAAGGGAGUUUCCUGGUUUGUCCU
GUGGAAAAUGUGGAG
>random_seq_from_cds__NO_8597 RANDOM_LENGTH 110 SEQ_LENGTH 86
  GC_CONTENT 0.558139534883721 BASEPAIR 27 FREE_ENERGY
  -22.20 LEN_BP_RATIO 3.18518518518519
GAUAAAAGCGCCUGAAGUAAUAGUCCAGGAGAGGAAGCUGCAGAGCAUGUUACAGACCGAGCGGG
AUGCACUAUUCAACAUUGACAGGGAACGGCAGGGCCACCAGAAUC
>random_seq_from_cds__NO_8609 RANDOM_LENGTH 67 SEQ_LENGTH 54
  GC_CONTENT 0.574074074074074 BASEPAIR 21 FREE_ENERGY
  -24.80 LEN_BP_RATIO 2.57142857142857
AAUGAGAUGGCCACAGCAGCUUCCUCUCCUCCUGGAGAAGAGCUAUGAGCUGCCAGAUGGGCA
GG
>random_seq_from_cds__NO_8651 RANDOM_LENGTH 72 SEQ_LENGTH 62
  GC_CONTENT 0.887096774193548 BASEPAIR 21 FREE_ENERGY
  -34.90 LEN_BP_RATIO 2.95238095238095
UCCAGCCGUGCUACGCGGCCCGCCGCCCGGCCGUCUCCGUCGCCCGGGCCUCCCCGAGCCGCC
UCUCGGC
>random_seq_from_cds__NO_8653 RANDOM_LENGTH 87 SEQ_LENGTH 79
  GC_CONTENT 0.683544303797468 BASEPAIR 27 FREE_ENERGY
  -33.20 LEN_BP_RATIO 2.92592592592593
```

UGCAGAGUCAGCGCUUUGGGACCAAGGAGGUGGAGGAAGACCUGGGCCGUGCUCUACCCGGCCAG  
UCCCCACGGCGUAGCGCGGCUC

>random\_seq\_from\_cds\_\_NO\_8663 RANDOM\_LENGTH 81 SEQ\_LENGTH 69  
GC\_CONTENT 0.579710144927536 BASEPAIR 23 FREE\_ENERGY  
-26.60 LEN\_BP\_RATIO 3

CAUGCCCUUCCCAGGACUCCCUAUACUCAGACCCCUUGGACAGCACGUCUGCUCAGGCAGGAGAG  
GGAGUACAACGGAAGA

>random\_seq\_from\_cds\_\_NO\_8666 RANDOM\_LENGTH 99 SEQ\_LENGTH 79  
GC\_CONTENT 0.645569620253165 BASEPAIR 20 FREE\_ENERGY  
-22.02 LEN\_BP\_RATIO 3.95

CAACCCUGCCACUGAUGACUACGCUGUGCCACCCCCUCGGAGCACAAAGCCCCUCCUUGCUCCCA  
AGCCCCAGGGCCCAGCCUUCCCUGAACCUGGUAC

>random\_seq\_from\_cds\_\_NO\_8668 RANDOM\_LENGTH 69 SEQ\_LENGTH 59  
GC\_CONTENT 0.491525423728814 BASEPAIR 21 FREE\_ENERGY  
-18.50 LEN\_BP\_RATIO 2.80952380952381

GUAGGGACUGACAAGACUGGGGUCAAGUCAGAGGGCUCUACCUGAUCUAGUUUUUGAACUUGCAA  
ACAA

>random\_seq\_from\_cds\_\_NO\_8674 RANDOM\_LENGTH 81 SEQ\_LENGTH 54  
GC\_CONTENT 0.518518518518518 BASEPAIR 24 FREE\_ENERGY  
-43.20 LEN\_BP\_RATIO 2.25

CAGGAACAUCAGGGAGGAGAUCAUGAAGAACGAGUUGGUCUGAGCCAUCAUGGCUCAGACCA  
GCUCAUACUUCAUGCU

>random\_seq\_from\_cds\_\_NO\_8679 RANDOM\_LENGTH 73 SEQ\_LENGTH 65  
GC\_CONTENT 0.6 BASEPAIR 21 FREE\_ENERGY -25.80 LEN\_BP\_RATIO  
3.0952380952381

AGCAGUGGGUCCUGGUCUCCUACAAGUCCUGGGGCAUUGGAGCCCCAAGCAGUGUAAUCCUGG  
CUACUGUG

>random\_seq\_from\_cds\_\_NO\_8702 RANDOM\_LENGTH 110 SEQ\_LENGTH 93  
GC\_CONTENT 0.666666666666667 BASEPAIR 34 FREE\_ENERGY  
-39.20 LEN\_BP\_RATIO 2.73529411764706

AGGCGUCGGACGGCAGCCUCCUGGGGGACCUCGGGCACACACCACUUAGCAAGAAGGAGGUUAUC  
AAGUGGCAGAGGCCGAGGCUCAGCCGCCAGGCUUUGAUGAGAUGC

>random\_seq\_from\_cds\_\_NO\_8706 RANDOM\_LENGTH 97 SEQ\_LENGTH 73  
GC\_CONTENT 0.63013698630137 BASEPAIR 28 FREE\_ENERGY  
-37.60 LEN\_BP\_RATIO 2.60714285714286

AACGCCUUGAUGCGGACGGGAACGGGGCAUCCACUUUGAGGGACUUUGUGGUUGGCCUCUCCA  
UCCUGCUGCGGGGCACAGUCCACGAGAAGCUC

>random\_seq\_from\_cds\_\_NO\_8718 RANDOM\_LENGTH 81 SEQ\_LENGTH 74  
GC\_CONTENT 0.756756756756757 BASEPAIR 27 FREE\_ENERGY  
-34.00 LEN\_BP\_RATIO 2.74074074074074

AGCACAUGAGCCGGCUGUCGGGCCGGAGCUCCGCCACCGAGGCACUGCCUCGUCCAGCACCCAC  
GGCCCCGCGCCAGCUCC

>random\_seq\_from\_cds\_\_NO\_8741 RANDOM\_LENGTH 87 SEQ\_LENGTH 67  
GC\_CONTENT 0.597014925373134 BASEPAIR 22 FREE\_ENERGY

---

-25.50 LEN\_BP\_RATIO 3.04545454545455  
CUCUGGUCCAGCUUCACCUCAAACCAGGCACCAGGGUUACUUAAGAUGGCCCCAGGGCCAUAAGGGU  
AGAGACUGAGCAUUAUGAAGAA

>random\_seq\_from\_cds\_\_NO\_8743 RANDOM\_LENGTH 81 SEQ\_LENGTH 73  
GC\_CONTENT 0.465753424657534 BASEPAIR 24 FREE\_ENERGY  
-16.00 LEN\_BP\_RATIO 3.04166666666667  
GUGAUGAUGAAGAUUUGGAUGACUUAUUUGUGGGACCUGUUGGGAACUCUGACCUCACCUUAU  
CCUUGCCAUCCACCUA

>random\_seq\_from\_cds\_\_NO\_8746 RANDOM\_LENGTH 82 SEQ\_LENGTH 69  
GC\_CONTENT 0.608695652173913 BASEPAIR 24 FREE\_ENERGY  
-27.70 LEN\_BP\_RATIO 2.875  
UGAAGCAGAGCAUGUGGAGUCUGCUGACAGCGCUCUCCGGAAAGGAGGCAGAUGCAGAGGGCAAA  
CCACAGGGAAGCUGGAA

>random\_seq\_from\_cds\_\_NO\_8750 RANDOM\_LENGTH 95 SEQ\_LENGTH 84  
GC\_CONTENT 0.75 BASEPAIR 33 FREE\_ENERGY -49.40  
LEN\_BP\_RATIO 2.54545454545455  
ACUUCGCGGAGCUGGAACGCUGGCCGCGCAGGCCUUGAGGGCUCGCGGCCCCAGUGGCGCGGCCG  
CGAUGCGCUCCAUGGCAUCUGGAGGGUGGU

>random\_seq\_from\_cds\_\_NO\_8764 RANDOM\_LENGTH 82 SEQ\_LENGTH 65  
GC\_CONTENT 0.584615384615385 BASEPAIR 25 FREE\_ENERGY  
-23.70 LEN\_BP\_RATIO 2.6  
AGGAGCACAGGAUGCCUCCUCCGAGAAGGUCUGCAGCUGAUCCUUGGAGUAGACGUACUGCCAGA  
UGCGUCCAUGUCGUUC

>random\_seq\_from\_cds\_\_NO\_8767 RANDOM\_LENGTH 96 SEQ\_LENGTH 78  
GC\_CONTENT 0.525641025641026 BASEPAIR 23 FREE\_ENERGY  
-25.33 LEN\_BP\_RATIO 3.39130434782609  
UCUCCUGCAAAGCCAGCUUUAUACCCCCGAACCCGUUGUCGAUGACCACAGGCUGGUUGGCCGA  
UGAUGUCGUAGGACUCCAUAUCAGUUGGUGG

>random\_seq\_from\_cds\_\_NO\_8770 RANDOM\_LENGTH 99 SEQ\_LENGTH 75  
GC\_CONTENT 0.386666666666667 BASEPAIR 26 FREE\_ENERGY  
-19.42 LEN\_BP\_RATIO 2.88461538461538  
CUUCACUCCUAAAAGGCAAAACUCCACAGUUGUGUUUAGCAGAAUAUCUCCAGGAUGUUCUUG  
GUUGCCGCUAUGGAACAAAUAACCUUUCUACAUU

>random\_seq\_from\_cds\_\_NO\_8775 RANDOM\_LENGTH 72 SEQ\_LENGTH 57  
GC\_CONTENT 0.456140350877193 BASEPAIR 21 FREE\_ENERGY  
-15.30 LEN\_BP\_RATIO 2.71428571428571  
UCAGAGUAAGAUCGGCGCUUGAAACAUUUUACCCAAUGAAGCCAGCUGGGAAAACUCUAGAAU  
CAUCCA

>random\_seq\_from\_cds\_\_NO\_8788 RANDOM\_LENGTH 84 SEQ\_LENGTH 73  
GC\_CONTENT 0.452054794520548 BASEPAIR 23 FREE\_ENERGY  
-17.70 LEN\_BP\_RATIO 3.17391304347826  
AGAAUUGUCUUUGGAAGCUCAAGGCAUCAAGCUGACAGAGAAACUGUUGCAGUGAAGGCCAACA  
GAAAACAAUGAAGAGGAAU

>random\_seq\_from\_cds\_\_NO\_8816 RANDOM\_LENGTH 81 SEQ\_LENGTH 67



---

```
GC_CONTENT    0.447761194029851    BASEPAIR    25    FREE_ENERGY
-22.00    LEN_BP_RATIO    2.68
GAUGUCAUCUUGAUCAAUGGGCGUUUGAAGGAAGGAGAUACAAUCAUUGUUCUGGAGUAGAAGG
GCCCAUUGUAACUCAG
>random_seq_from_cds__NO_8818    RANDOM_LENGTH    110    SEQ_LENGTH    86
GC_CONTENT    0.441860465116279    BASEPAIR    26    FREE_ENERGY
-22.30    LEN_BP_RATIO    3.30769230769231
GCUCAGGGGGUAAAGAUUCUUGGAAAAGACCUGGAGAAAACAUUGGCUGGUUUACCCCUCCUUGU
GGCUUAUAAAGAAGAUGAAAUCCUGUUCUUAAGGAUGAAUUGA
>random_seq_from_cds__NO_8828    RANDOM_LENGTH    70    SEQ_LENGTH    56
GC_CONTENT    0.678571428571429    BASEPAIR    19    FREE_ENERGY
-27.12    LEN_BP_RATIO    2.94736842105263
GGUGGGCGCUGUUCGCGAGCCAGUGCAGGCCUGUUGGGAGUACUGGACCAGGUGCUGCAUGCUG
CUGUG
>random_seq_from_cds__NO_8830    RANDOM_LENGTH    90    SEQ_LENGTH    78
GC_CONTENT    0.58974358974359    BASEPAIR    26    FREE_ENERGY
-27.00    LEN_BP_RATIO    3
GUAGUCGUAGCUGUGCAGGAUGCUGUUGGUGAUGCUGACGUGGUUGGCCGCAUCUGGUGGAUGC
GCUGUGGGAUGCUGACGAUGGUCGA
>random_seq_from_cds__NO_8833    RANDOM_LENGTH    119    SEQ_LENGTH    107
GC_CONTENT    0.476635514018692    BASEPAIR    36    FREE_ENERGY
-26.30    LEN_BP_RATIO    2.97222222222222
AAUAGUCGAUUGAGUCUUUUGAAUACUUUACAGCGUGGUCCUUUUGAGUCGAAACAUCGCCAG
UACAGGAGGGCCAGGCAUCGGUAACCAUAAUGCAGCCAGUUGUUUGUCUUCUGG
>random_seq_from_cds__NO_8837    RANDOM_LENGTH    86    SEQ_LENGTH    74
GC_CONTENT    0.662162162162162    BASEPAIR    29    FREE_ENERGY
-35.50    LEN_BP_RATIO    2.55172413793103
UCUGCCUCUUGCAGUCCCUGUGGCCGUUGGAGCCUGGAGACCACGGCUUCGUCUGCGGCCGUGAC
UUGUGGAGGGGAAUGUUUUA
>random_seq_from_cds__NO_8840    RANDOM_LENGTH    90    SEQ_LENGTH    72
GC_CONTENT    0.458333333333333    BASEPAIR    25    FREE_ENERGY
-23.00    LEN_BP_RATIO    2.88
UUUAUUGGUAUUGCCACACCGUUGAUGUUAUGUUGCAGUGGUUUGCAGACAAAGUAUUCUGG
UGGAGGUGGCCAGUCUUGAAGAGCU
>random_seq_from_cds__NO_8842    RANDOM_LENGTH    75    SEQ_LENGTH    62
GC_CONTENT    0.612903225806452    BASEPAIR    20    FREE_ENERGY
-22.70    LEN_BP_RATIO    3.1
UUGGAUUUUGGCAAAGCCUUUCUGCAGGUGUGUCCGAGGUGUGGCUGGGCGGUGCGCUCUCAGA
GUCCUUGGUG
>random_seq_from_cds__NO_8844    RANDOM_LENGTH    78    SEQ_LENGTH    58
GC_CONTENT    0.551724137931034    BASEPAIR    23    FREE_ENERGY
-19.20    LEN_BP_RATIO    2.52173913043478
CCUGAUCUCAUCUGUCCUUUAGAGGGGAGAGAAGUUCGUUCCGGCCAAAGGGGACCAGUGUGU
AGAACUGCUCCUC
```

---

```
>random_seq_from_cds__NO_8848 RANDOM_LENGTH 71 SEQ_LENGTH 58
  GC_CONTENT 0.689655172413793 BASEPAIR 19 FREE_ENERGY
  -28.20 LEN_BP_RATIO 3.05263157894737
ACGGAGGAGCGCAGCUCCUUGCGGUGGCUCGCUCUGUUGUUGCCACAGGGCCUGGUUUUGGUGGG
CUCCGG
>random_seq_from_cds__NO_8850 RANDOM_LENGTH 87 SEQ_LENGTH 75
  GC_CONTENT 0.76 BASEPAIR 30 FREE_ENERGY -46.00
  LEN_BP_RATIO 2.5
GUCCUCUCGGUGCGCCUGGUGGGCUUCUUGCCC GCGGACCUCCGGGCAGGCGCGGGCGGUUCUC
CGCGGGCGCACAGGGCACUGCG
>random_seq_from_cds__NO_8872 RANDOM_LENGTH 110 SEQ_LENGTH 99
  GC_CONTENT 0.464646464646465 BASEPAIR 33 FREE_ENERGY
  -22.90 LEN_BP_RATIO 3
UGGACAAAACCACCGUGUUGGAAAAGGUCAUCGGAUUUUUGCAGAAACACAAUGGAAGUCUCAGC
GCAAACGGAAUCUGUGACAUCAGCAAGACUGGAAGCCUUCAUU
>random_seq_from_cds__NO_8874 RANDOM_LENGTH 75 SEQ_LENGTH 55
  GC_CONTENT 0.490909090909091 BASEPAIR 21 FREE_ENERGY
  -21.80 LEN_BP_RATIO 2.61904761904762
UCAUCUAUGUCUCUGACAGUAUCACGCCUCUCCUUGGGCAUUUACCGGUCGGAUGUCAUGGAUCA
GAAUUUGUUA
>random_seq_from_cds__NO_8883 RANDOM_LENGTH 72 SEQ_LENGTH 60
  GC_CONTENT 0.633333333333333 BASEPAIR 21 FREE_ENERGY
  -27.20 LEN_BP_RATIO 2.85714285714286
UCCGGGUGGAAAGGAGGCAGGAGCUGGCUCUGGAAGACCCGCCAUCCGAGGCCUCCACUCCUCA
GCACUAA
>random_seq_from_cds__NO_8901 RANDOM_LENGTH 88 SEQ_LENGTH 63
  GC_CONTENT 0.46031746031746 BASEPAIR 23 FREE_ENERGY
  -16.90 LEN_BP_RATIO 2.73913043478261
CUACAGAACAAGCCUCCAGGAUUCAUCAACACAAAGAGAAACUUUGGUUUUGUCCUGCUAAGGUG
GAGGAUUCAGGACAUUACUAUUG
>random_seq_from_cds__NO_8929 RANDOM_LENGTH 92 SEQ_LENGTH 67
  GC_CONTENT 0.537313432835821 BASEPAIR 25 FREE_ENERGY
  -23.90 LEN_BP_RATIO 2.68
GCCUUCUUUCAUGUGCCACGCUGGAGUGCCACAGCAUACAUUAUUAUACAGCUCCAGGCUCC
GGAUUUUCGAGCUUACUUGAUAGGAGG
>random_seq_from_cds__NO_8934 RANDOM_LENGTH 87 SEQ_LENGTH 77
  GC_CONTENT 0.584415584415584 BASEPAIR 24 FREE_ENERGY
  -26.10 LEN_BP_RATIO 3.20833333333333
UCCCCGAAUCGCUGGGCUUUGGCCUGUUGAAGAACCUGUCAGAAGAACAAAUCGCGGUCUACAGU
GCCCUUGAUCCAGGACGGGAUGA
>random_seq_from_cds__NO_8946 RANDOM_LENGTH 70 SEQ_LENGTH 51
  GC_CONTENT 0.470588235294118 BASEPAIR 20 FREE_ENERGY
  -15.80 LEN_BP_RATIO 2.55
AAUAGUGGAAGGAUCGCAGUAAUAUAGUUCGGUUCUUCUUGGACCAAAGCUUAACCAUGUUGCA
```

GUGGA

```
>random_seq_from_cds__NO_8951 RANDOM_LENGTH 83 SEQ_LENGTH 56
  GC_CONTENT 0.410714285714286 BASEPAIR 23 FREE_ENERGY
  -15.20 LEN_BP_RATIO 2.43478260869565
UGGUGGCAGUAGUGUGCCUAGUGACUGUGUGUGUCAUUUAUAGAGUUGACUUGGUUCUAUUUUUAU
AGACAUUUAACGAGAAGA
>random_seq_from_cds__NO_8972 RANDOM_LENGTH 84 SEQ_LENGTH 76
  GC_CONTENT 0.407894736842105 BASEPAIR 24 FREE_ENERGY
  -17.40 LEN_BP_RATIO 3.16666666666667
CUUUGUAAAAAUGAUGUUACUGAUGGAAGAGCAAAUACUGGCUUGAAAGAGCAGCCAAACUUUU
CCCAGGAAGUCCUGCAAUU
>random_seq_from_cds__NO_8976 RANDOM_LENGTH 95 SEQ_LENGTH 69
  GC_CONTENT 0.449275362318841 BASEPAIR 24 FREE_ENERGY
  -22.89 LEN_BP_RATIO 2.875
UUUACAGUGUUUGGAGUCUGAUAAAAGUGACUGGCGAGCAACCAUACAGACUUACUGCUGGCCU
AUGCUGAAUCUUAUGCUUCUUACGCUUUCCA
>random_seq_from_cds__NO_8982 RANDOM_LENGTH 86 SEQ_LENGTH 78
  GC_CONTENT 0.41025641025641 BASEPAIR 26 FREE_ENERGY
  -16.57 LEN_BP_RATIO 3
CUUGGUAGCGAUGAUUAUUGGAAACAUUGAUGUACGAGAACCAGAGCUUGAAGAUUUGACUAGUAU
CGAUGUUGGGUGCUAUUCGAG
>random_seq_from_cds__NO_8997 RANDOM_LENGTH 89 SEQ_LENGTH 74
  GC_CONTENT 0.527027027027027 BASEPAIR 25 FREE_ENERGY
  -23.90 LEN_BP_RATIO 2.96
CCUCAUCGUUGGCCACAGAGAAUUAUGGACCAGACUCAGUGCCUGAUGGAUAUCAGGGGUCACA
GACAUUUC AUGGGGCUCCACUAAC
>random_seq_from_cds__NO_9026 RANDOM_LENGTH 89 SEQ_LENGTH 70
  GC_CONTENT 0.457142857142857 BASEPAIR 23 FREE_ENERGY
  -23.60 LEN_BP_RATIO 3.04347826086957
AAGGAAGGACAGUGGGAUUGCAGUGUGUCUUAUGUAAGAAAUGAAGCCAGUGCUACCAAUGUAU
UGCUUGUCAGUGUCCAAGUAAAACA
>random_seq_from_cds__NO_9046 RANDOM_LENGTH 88 SEQ_LENGTH 70
  GC_CONTENT 0.371428571428571 BASEPAIR 25 FREE_ENERGY
  -17.00 LEN_BP_RATIO 2.8
AGAUGGACAGUACUUUGAACCUUGUUGUCCUUUACCUGAUCUAGUUGAAGUAUCCAGUGGUGAGG
AAAAUGAACAAAGUUGUUUUUAGU
>random_seq_from_cds__NO_9063 RANDOM_LENGTH 110 SEQ_LENGTH 81
  GC_CONTENT 0.37037037037037 BASEPAIR 30 FREE_ENERGY
  -19.90 LEN_BP_RATIO 2.7
UAAAUCUGAAGAACCUGAUUCUAUUACCAAUCCAUUAGUUCACCAUCUGUUUCCUCUGAAACUA
UGGACAAACCUGUAGAUUUGUCAACUAGAAAGGAAUUGAUACAG
>random_seq_from_cds__NO_9090 RANDOM_LENGTH 110 SEQ_LENGTH 90
  GC_CONTENT 0.455555555555556 BASEPAIR 30 FREE_ENERGY
  -22.40 LEN_BP_RATIO 3
```

---

CUUUUCCAUCUUCUUCUUGGGUAAUUUUUGGGAUCUACACUCCUCCAGCUGUAGAGUGGGCUUA  
UCAUCUUUCAACACGCAGGACAGGUACAGAUUCUUUCCUUGAGG

>random\_seq\_from\_cds\_\_NO\_9111 RANDOM\_LENGTH 96 SEQ\_LENGTH 84  
GC\_CONTENT 0.726190476190476 BASEPAIR 29 FREE\_ENERGY  
-36.80 LEN\_BP\_RATIO 2.89655172413793  
GCGCCCGGUGCCCAACGGGUGGACAGGGUCUCUACCUGCGGCAGUCUGGCCUCUGUCACGCUCG  
ACCCGGCCUCCUCCUCCUGCGCCUCCUCUGG

>random\_seq\_from\_cds\_\_NO\_9113 RANDOM\_LENGTH 75 SEQ\_LENGTH 58  
GC\_CONTENT 0.724137931034483 BASEPAIR 21 FREE\_ENERGY  
-32.30 LEN\_BP\_RATIO 2.76190476190476  
UGAAAAAGUUGGUGGUGCGGUGCAGCUGGGCCGUGGCUGCGGCUGGUGAGCAGGCGCCGCGAGA  
UGCUGAGGCG

>random\_seq\_from\_cds\_\_NO\_9115 RANDOM\_LENGTH 85 SEQ\_LENGTH 76  
GC\_CONTENT 0.776315789473684 BASEPAIR 25 FREE\_ENERGY  
-31.20 LEN\_BP\_RATIO 3.04  
GACACCGGCACGCUGUCUCCAUCGCUGCCGCUGCCGCUGCGCCGUGGCGCCCGGACUGAGGCU  
CAGGCUGAGGCCGCCCGGAG

>random\_seq\_from\_cds\_\_NO\_9117 RANDOM\_LENGTH 110 SEQ\_LENGTH 99  
GC\_CONTENT 0.666666666666667 BASEPAIR 35 FREE\_ENERGY  
-45.70 LEN\_BP\_RATIO 2.82857142857143  
GAUGAUGCUGGUCCUGCAGGUGCCUGGCUCUGCUCCAAGUGGCUGGCCUUGGUGCUGUUGCUGA  
AGGAGGCCACGGGGUGCAGUGGGAACUCACGGAGGUGCCAUUGCU

>random\_seq\_from\_cds\_\_NO\_9124 RANDOM\_LENGTH 67 SEQ\_LENGTH 49  
GC\_CONTENT 0.571428571428571 BASEPAIR 19 FREE\_ENERGY  
-18.70 LEN\_BP\_RATIO 2.57894736842105  
CCAGCAGCCAGGAGUAGUUGGCCAUGAUGCAGUACUGGAACAGCACCAUGACCAGCUUGCAGCCC  
GC

>random\_seq\_from\_cds\_\_NO\_9126 RANDOM\_LENGTH 92 SEQ\_LENGTH 74  
GC\_CONTENT 0.621621621621622 BASEPAIR 24 FREE\_ENERGY  
-22.60 LEN\_BP\_RATIO 3.08333333333333  
GGACACGAACAGGUGCAUGUGGAUGUAGUUGCGAGUGCAGUGGAGCCUCCCGAAAGCACAGAGG  
AUGCCAAGGGCGACCAGGAGCAUGACC

>random\_seq\_from\_cds\_\_NO\_9160 RANDOM\_LENGTH 89 SEQ\_LENGTH 66  
GC\_CONTENT 0.46969696969697 BASEPAIR 25 FREE\_ENERGY  
-21.00 LEN\_BP\_RATIO 2.64  
GUACGAAACAAGAGGGCUGGCAAGGAAGAACCCGUUGUUGUCCAUGCAGGUGCUGGAAUCGGAA  
GAACUGGGGUUCUUAUUACUAUGG

>random\_seq\_from\_cds\_\_NO\_9161 RANDOM\_LENGTH 77 SEQ\_LENGTH 64  
GC\_CONTENT 0.40625 BASEPAIR 22 FREE\_ENERGY -17.10  
LEN\_BP\_RATIO 2.90909090909091  
AAACAGCCAUGUGUCUCAUUGAAUGCAAUCAGCCAGUUUAUCCACUAGAUUUGUAAGAACAUG  
AGAGAUCAGCGA

>random\_seq\_from\_cds\_\_NO\_9170 RANDOM\_LENGTH 77 SEQ\_LENGTH 60  
GC\_CONTENT 0.85 BASEPAIR 23 FREE\_ENERGY -41.70

```
LEN_BP_RATIO 2.60869565217391
AUGGACGGGCGUGCCCGGUCGGGCGUGGGGGCCGCCUGCCUUCUGCUGCUGGCGGCCGGCUGGCU
GGGGCCUGAGGC
>random_seq_from_cds__NO_9200 RANDOM_LENGTH 86 SEQ_LENGTH 62
GC_CONTENT 0.419354838709677 BASEPAIR 21 FREE_ENERGY
-15.02 LEN_BP_RATIO 2.95238095238095
UGUCAUCCUCCUUUCAUGAAACUUGAUCAGAAACUGGCAAGCUCUAAAUUUGUUGGGGUUCAUG
GUGUACAGCAAGAUUCGUUUC
>random_seq_from_cds__NO_9211 RANDOM_LENGTH 78 SEQ_LENGTH 66
GC_CONTENT 0.5 BASEPAIR 25 FREE_ENERGY -26.70 LEN_BP_RATIO
2.64
CAUUUGCUCAUAGAAGUCAAAACAGGUCCAUGGGGAUGUCAGAUUUACCCUGUGGAUCUGUCACUC
GGGAAGUGGAGGG
>random_seq_from_cds__NO_9212 RANDOM_LENGTH 81 SEQ_LENGTH 62
GC_CONTENT 0.5 BASEPAIR 21 FREE_ENERGY -19.20 LEN_BP_RATIO
2.95238095238095
CCCACCACUGCUUUCAGCAGUCUUGAAAUUCGGCAGAUUUGCUUGUGAAAGUCUCUGUGAUGAGC
UCAGUGGCCUCCCUU
>random_seq_from_cds__NO_9215 RANDOM_LENGTH 81 SEQ_LENGTH 72
GC_CONTENT 0.5277777777777778 BASEPAIR 24 FREE_ENERGY
-24.30 LEN_BP_RATIO 3
CUGAGCUUCCUGAGGUACUCGGUGAUGUCACUGGUUUGCAGCCCAACGCUGACAGCUGCAUACAA
GGAGUAGGCAGUUAGU
>random_seq_from_cds__NO_9234 RANDOM_LENGTH 85 SEQ_LENGTH 75
GC_CONTENT 0.6133333333333333 BASEPAIR 28 FREE_ENERGY
-26.60 LEN_BP_RATIO 2.67857142857143
CCCCUCUGCACAUGCCGCCACUCGCUCAGGUAGCGGGACACGGGGUCUCGUAGCAGGGUGAUGUA
GUAGAACUUCCUGGGCGUG
>random_seq_from_cds__NO_9235 RANDOM_LENGTH 99 SEQ_LENGTH 92
GC_CONTENT 0.760869565217391 BASEPAIR 35 FREE_ENERGY
-46.70 LEN_BP_RATIO 2.62857142857143
CGCAGCGCGGCGGAGUCGCGGCGGUCCAGCACGCCGGCACGCAGUUGGUGAGCUCGGUCCAGUC
GGCGUGCAGCCCGCAGCUCCAGCCGGUGGAGAAG
>random_seq_from_cds__NO_9237 RANDOM_LENGTH 86 SEQ_LENGTH 76
GC_CONTENT 0.644736842105263 BASEPAIR 31 FREE_ENERGY
-35.20 LEN_BP_RATIO 2.45161290322581
GCCGAAGGUGGUGCCGCCGUCUUCUGGAUGUGCAGGAAGACGAUCACGUCGUCGCCCUUCAUGU
CGAAGCGCAGCGAGCGCUCCA
>random_seq_from_cds__NO_9248 RANDOM_LENGTH 87 SEQ_LENGTH 56
GC_CONTENT 0.607142857142857 BASEPAIR 20 FREE_ENERGY
-23.80 LEN_BP_RATIO 2.8
GAAGAAUCCGGUGGAUGAGACUACGGAUCCGGCGAAUGGCUGACGCAUGGAUCCAAGCAAUCAA
GUCCUUGGCAGAAAAGCAGAAC
>random_seq_from_cds__NO_9263 RANDOM_LENGTH 78 SEQ_LENGTH 53
```

```
GC_CONTENT    0.60377358490566 BASEPAIR   21 FREE_ENERGY
-21.40 LEN_BP_RATIO  2.52380952380952
AACAAAGGACAAGGACAUGCUGAAGGUACAAGGUGACCUGCCAAAGCUCAGAGCUGGCCAAGGACA
UCCUGGUGCCUC
>random_seq_from_cds__NO_9270 RANDOM_LENGTH 80 SEQ_LENGTH    65
GC_CONTENT    0.415384615384615 BASEPAIR   23 FREE_ENERGY
-19.00 LEN_BP_RATIO  2.82608695652174
UUACAACAUCCUGCUCUAUUCUUGGUGCCACUUAUGUUAUUGCGGGGAUUGUCAUUUGUGCAU
UUUGGGUGUACAGGC
>random_seq_from_cds__NO_9272 RANDOM_LENGTH 86 SEQ_LENGTH    66
GC_CONTENT    0.439393939393939 BASEPAIR   19 FREE_ENERGY
-17.30 LEN_BP_RATIO  3.47368421052632
GUUAUUGAAGUGAAAGCAAGGGGAAGAUUUGGUUGUGUCUGGAAAGCCCAGUUGCUAACGAAU
AUGUGGCUGUCAAAAUAUUUC
>random_seq_from_cds__NO_9285 RANDOM_LENGTH 88 SEQ_LENGTH    73
GC_CONTENT    0.383561643835616 BASEPAIR   21 FREE_ENERGY
-15.33 LEN_BP_RATIO  3.47619047619048
CAUCCAUUUGAAGCCUCCAUCUCCUGUCAGAAGCACUGUCCUCUAGAUGUCCUGAAAAUAUC
CUGAUACUUUUUCAAGUGUAUUU
>random_seq_from_cds__NO_9291 RANDOM_LENGTH 77 SEQ_LENGTH    55
GC_CONTENT    0.381818181818182 BASEPAIR   20 FREE_ENERGY
-19.00 LEN_BP_RATIO  2.75
CGAGCUCACUUGAAACGAACAGGAGAUUUUGACAACUGGCUGUCAUUCUCAGGAGUUUCAACUG
AUAAGAAUUUCA
>random_seq_from_cds__NO_9296 RANDOM_LENGTH 110 SEQ_LENGTH   96
GC_CONTENT    0.510416666666667 BASEPAIR   32 FREE_ENERGY
-30.60 LEN_BP_RATIO  3
CGCAGAAGCUAAGGCGGUGUGUGAAUUUGAAGGCGGCCAUCUCGCAACUUACAAGCAGCUAGAGG
CAGCCAGAAAAUUGGGAUUUC AUGUCUGUCUGCUGGAUGGAUG
>random_seq_from_cds__NO_9311 RANDOM_LENGTH 82 SEQ_LENGTH    72
GC_CONTENT    0.458333333333333 BASEPAIR   23 FREE_ENERGY
-18.10 LEN_BP_RATIO  3.1304347826087
AUACCUCGGUAGUUAUUGUCACUGAAGUCCUGCAUGUUCUUCUUACUCGUUCAGUGAUAGGAUC
UGUCACCACUGGUGUGA
>random_seq_from_cds__NO_9316 RANDOM_LENGTH 86 SEQ_LENGTH    58
GC_CONTENT    0.53448275862069 BASEPAIR   24 FREE_ENERGY
-21.90 LEN_BP_RATIO  2.41666666666667
UGUAUAACACCCGAGCUAAUGUUUUCUUGAUUGCGUUUGACUCUCUGCAUCUCAGGAGUGACAGG
GGUUGCGGUGGCUUCCCCAC
>random_seq_from_cds__NO_9323 RANDOM_LENGTH 72 SEQ_LENGTH    48
GC_CONTENT    0.416666666666667 BASEPAIR   19 FREE_ENERGY
-15.70 LEN_BP_RATIO  2.52631578947368
ACACGCAGUAUUUCUGGCGUGUCUUGAACAACUGUAAUUUUUCCUUUACUGUUUUUAAGGUCACA
CUGGUAU
```

---

```
>random_seq_from_cds__NO_9332 RANDOM_LENGTH 89 SEQ_LENGTH 73
GC_CONTENT 0.438356164383562 BASEPAIR 30 FREE_ENERGY
-27.30 LEN_BP_RATIO 2.433333333333333
UCUUUGUAUUUCACCUAUACUCUGUAAUUCUGUGGCCUCUUUUAGGUGAAGCUGCUCCAGAUUUAU
CGGGUAUGGUGUGGUAGUGGCCUU
>random_seq_from_cds__NO_9333 RANDOM_LENGTH 81 SEQ_LENGTH 73
GC_CONTENT 0.397260273972603 BASEPAIR 26 FREE_ENERGY
-17.90 LEN_BP_RATIO 2.80769230769231
UACUCUUCUCAUACUUCUUCUUGUACUGGUACAGAACUGGCAAGUUGGCUUGUAUUCAGGACAUG
AUUCAUGAUCAGAGAC
>random_seq_from_cds__NO_9337 RANDOM_LENGTH 83 SEQ_LENGTH 64
GC_CONTENT 0.546875 BASEPAIR 22 FREE_ENERGY -25.10
LEN_BP_RATIO 2.90909090909091
GGCCUGUUUGGUGGCCUGUGUGGCCUUCUUGAUGUCUGGUCGAUCAGCCACUGUGGUGUAAUGCA
GGUUCUCUUUGGCAUCUU
>random_seq_from_cds__NO_9341 RANDOM_LENGTH 82 SEQ_LENGTH 67
GC_CONTENT 0.477611940298507 BASEPAIR 22 FREE_ENERGY
-17.50 LEN_BP_RATIO 3.04545454545455
CAGGAUCUGAGGCGUGUCAGGUACGGCAUGGCAGGUUCCUCUUUCCUUGACAUGUUUCUCUUUGU
AUUUCAGCAUCACUUUC
>random_seq_from_cds__NO_9342 RANDOM_LENGTH 97 SEQ_LENGTH 58
GC_CONTENT 0.5 BASEPAIR 24 FREE_ENERGY -23.90 LEN_BP_RATIO
2.416666666666667
UAUUAAAGUAUUCUGAGGGCGAGCACCGUGUUUUUGUCAUCAGUGACAGAAAGCUUGCAACCCU
UGAGGAACUCCCGGUCCAGCUUAUAUCAAAC
>random_seq_from_cds__NO_9343 RANDOM_LENGTH 80 SEQ_LENGTH 64
GC_CONTENT 0.625 BASEPAIR 24 FREE_ENERGY -27.30
LEN_BP_RATIO 2.666666666666667
AUCGCUUUGCUGCAGGGAUGACUUGGCAGCCUGGAGGAAGUCCGGUCGGUCAGGAGUCCACUUC
AGUGGGCUUUGUUGG
>random_seq_from_cds__NO_9356 RANDOM_LENGTH 79 SEQ_LENGTH 71
GC_CONTENT 0.52112676056338 BASEPAIR 21 FREE_ENERGY
-15.60 LEN_BP_RATIO 3.38095238095238
CCAUGUCCUUCACGUCUUUAGCAUGCUUCAAGGCUGUGGUCUGGUUCCAGCGUGAUGAUGGGGU
CUCUCUUUGGUGGC
>random_seq_from_cds__NO_9357 RANDOM_LENGTH 84 SEQ_LENGTH 72
GC_CONTENT 0.430555555555556 BASEPAIR 23 FREE_ENERGY
-18.90 LEN_BP_RATIO 3.1304347826087
AAGUUCAACAUACAGAUACCUGACUCUGAAGCUUCUGCCCUCGCUUGGCUCUAAAAGAUCAGGA
GUAUCAGGAACUGAAGUAA
>random_seq_from_cds__NO_9361 RANDOM_LENGTH 84 SEQ_LENGTH 67
GC_CONTENT 0.477611940298507 BASEPAIR 24 FREE_ENERGY
-18.20 LEN_BP_RATIO 2.791666666666667
ACAUAGCGGCAAUGGAUCACUUGGGGUGUGUAUGGCAGAGAGAUCAUGUGGCCUUGCAUCUUGAA
```

```
GAAGUCUGAUUUGUAGAUC
>random_seq_from_cds__NO_9362 RANDOM_LENGTH 69 SEQ_LENGTH 50
  GC_CONTENT 0.58 BASEPAIR 20 FREE_ENERGY -17.60
  LEN_BP_RATIO 2.5
AACCCACUGACAGCCUCUUGUGUCUUCUUGACUUGGCGGAUCUCAGGGGUAUCGGGAGUUGUAU
GGAU
>random_seq_from_cds__NO_9368 RANDOM_LENGTH 110 SEQ_LENGTH 99
  GC_CONTENT 0.4040404040404040 BASEPAIR 34 FREE_ENERGY
  -29.99 LEN_BP_RATIO 2.91176470588235
GACAAGCUUGUAGUCAUCCUUGUUUCAACAUGUGAGCUUUUAUACUUGAUCAUCAUCACGUAGA
UCAUAAGCAUGCUUGGCAUGGAGGAUUUCAGGAGUGUCCAGACG
>random_seq_from_cds__NO_9370 RANDOM_LENGTH 81 SEQ_LENGTH 64
  GC_CONTENT 0.53125 BASEPAIR 24 FREE_ENERGY -19.90
  LEN_BP_RATIO 2.666666666666667
UUCCUGACGUGAUCAUUGACUUGCAAGUCGGGGUGGCAAAUCCAUCGUGGAGGCGCAGGCGGUA
AUCAAUCUCACUGACU
>random_seq_from_cds__NO_9374 RANDOM_LENGTH 87 SEQ_LENGTH 62
  GC_CONTENT 0.548387096774194 BASEPAIR 23 FREE_ENERGY
  -22.50 LEN_BP_RATIO 2.69565217391304
GACAAGGUGCUGGAAGGCAGGAUGUAGCUGGUGGCUUUCACUCUAUCCAGGCCUCCUUGUACAG
GUUCACUGCUGUAAAGAUUCUU
>random_seq_from_cds__NO_9378 RANDOM_LENGTH 110 SEQ_LENGTH 79
  GC_CONTENT 0.531645569620253 BASEPAIR 27 FREE_ENERGY
  -23.80 LEN_BP_RATIO 2.92592592592593
AGGUCAUCUUUAUACACAUAUCAUCACUCAAGAUCUCCUGGGCGUUUCGGACGCGUAUAACAUUGG
GUUCUCCAGAAGAGACGUCCACUGGUGGAAUAGUGUCGAUACU
>random_seq_from_cds__NO_9386 RANDOM_LENGTH 81 SEQ_LENGTH 74
  GC_CONTENT 0.540540540540541 BASEPAIR 22 FREE_ENERGY
  -19.93 LEN_BP_RATIO 3.36363636363636
AGUGGGAUCCAGCCAAUGCCUCGGAGCCACUCCAGGUCAGCUCUGUAGACAUUCAUCACUCUGUA
GGUCAUAGGCCUUUCU
>random_seq_from_cds__NO_9390 RANDOM_LENGTH 72 SEQ_LENGTH 57
  GC_CONTENT 0.473684210526316 BASEPAIR 21 FREE_ENERGY
  -15.80 LEN_BP_RATIO 2.71428571428571
UCAGCUUUGUAUUUCAGCCUCACUCUGAACGUCAUUGCAGUGAUGGGCAUGAACAAAUGGCACAG
CAUCUGG
>random_seq_from_cds__NO_9392 RANDOM_LENGTH 93 SEQ_LENGTH 74
  GC_CONTENT 0.5 BASEPAIR 27 FREE_ENERGY -21.50 LEN_BP_RATIO
  2.74074074074074
UGUGCAGCAGGGGGUUUCUGUGAGGGUGUACUUUGAUUUGGUGGCAUUCAGUCUUUCCGGUAU
UUAUCAUCAUCGAGGAUCUCGCCACUU
>random_seq_from_cds__NO_9395 RANDOM_LENGTH 85 SEQ_LENGTH 66
  GC_CONTENT 0.590909090909091 BASEPAIR 25 FREE_ENERGY
  -27.40 LEN_BP_RATIO 2.64
```



AACAUUCAUCGCUCUGCAGUUCGUAGGCCUUCUUGGCCUGAAUCACAUCGUUCUGGUCGGGCAUG  
CAGGUCCACUGGUGCAGGUA

>random\_seq\_from\_cds\_\_NO\_9410 RANDOM\_LENGTH 82 SEQ\_LENGTH 73  
GC\_CONTENT 0.520547945205479 BASEPAIR 24 FREE\_ENERGY  
-26.10 LEN\_BP\_RATIO 3.04166666666667

UGAAUUUGAGCUGGUCUGCAGGCUGGCGAUACUUCUGUCACUCAGGAUUUCUCCAGCUCUCUUC  
ACUUUCUGACCUCUAC

>random\_seq\_from\_cds\_\_NO\_9420 RANDOM\_LENGTH 85 SEQ\_LENGTH 69  
GC\_CONTENT 0.478260869565217 BASEPAIR 28 FREE\_ENERGY  
-25.10 LEN\_BP\_RATIO 2.46428571428571

GUCUGACUUUAACAAAUCGUCACUCUGGAGGUCAUAGGCCUUUCGUGCAUGAAUGAUGUCAUUC  
UGGUCGGGCAGGCAGAUCCA

>random\_seq\_from\_cds\_\_NO\_9422 RANDOM\_LENGTH 101 SEQ\_LENGTH 61  
GC\_CONTENT 0.508196721311475 BASEPAIR 22 FREE\_ENERGY  
-20.20 LEN\_BP\_RATIO 2.77272727272727

UGUACCUUGUCUUGUAUUUCUAAAAUCUUUCUUGUACUCACGGUCACUCUGCACUUUGGCAAUG  
UGGAGGGACCACAUUAUCUUGGGGUCAUCGUGUACU

>random\_seq\_from\_cds\_\_NO\_9442 RANDOM\_LENGTH 78 SEQ\_LENGTH 46  
GC\_CONTENT 0.478260869565217 BASEPAIR 19 FREE\_ENERGY  
-21.60 LEN\_BP\_RATIO 2.42105263157895

AAAAUCUGGGUGGCUCGUUUUUUCUCAUCCUCGAGAGAACCACUAGUCAUCCAGCCAAUGCC  
UUUUAGCCACUGA

>random\_seq\_from\_cds\_\_NO\_9448 RANDOM\_LENGTH 86 SEQ\_LENGTH 64  
GC\_CONTENT 0.453125 BASEPAIR 24 FREE\_ENERGY -15.40  
LEN\_BP\_RATIO 2.66666666666667

GCUUUAGCCAGAACAAUGUCAGGUGUAUCAGGCAUGAUGUGGAUCUGAGUCUUGUCUUUGUCCCA  
AGCUUCUCUAUAAAGUCUCAU

>random\_seq\_from\_cds\_\_NO\_9454 RANDOM\_LENGTH 89 SEQ\_LENGTH 75  
GC\_CONTENT 0.413333333333333 BASEPAIR 22 FREE\_ENERGY  
-17.40 LEN\_BP\_RATIO 3.40909090909091

CUUGUAUUCUCUUUCACUCUGCAUUUGGCUACAUUCAUGGACAACACAAGUUUUGGGUCAUCUU  
GCAGACUCCGGAUCCAACAUGGU

>random\_seq\_from\_cds\_\_NO\_9457 RANDOM\_LENGTH 86 SEQ\_LENGTH 79  
GC\_CONTENT 0.354430379746835 BASEPAIR 28 FREE\_ENERGY  
-15.90 LEN\_BP\_RATIO 2.82142857142857

AAAUAUCUGGUGUAUCAGGCAUCACAUGAAUCUUGGUCUUAUCUUUAUUCCAAUCAUUGGUGUAU  
AAAUGCCUUGUUAUGGUAUG

>random\_seq\_from\_cds\_\_NO\_9460 RANDOM\_LENGTH 73 SEQ\_LENGTH 63  
GC\_CONTENT 0.444444444444444 BASEPAIR 23 FREE\_ENERGY  
-18.70 LEN\_BP\_RATIO 2.73913043478261

UGGUCAGCUCAAUGUUCUUGCAUCUGGAAGGAGGAUGUACUUGUGAAUCAGGUGCUUGUAGUUA  
GUGUUGGU

>random\_seq\_from\_cds\_\_NO\_9465 RANDOM\_LENGTH 82 SEQ\_LENGTH 62  
GC\_CONTENT 0.483870967741936 BASEPAIR 22 FREE\_ENERGY

```
-17.10 LEN_BP_RATIO 2.81818181818182
AAUCUGGGGGAUAUCAGGCAUGAUGUGGACUUUGUUUUGUCAGCCUCCCAUGCUUGUUUGUAGA
GAUGCUUCGUUCAUAAU
>random_seq_from_cds__NO_9470 RANDOM_LENGTH 68 SEQ_LENGTH 59
GC_CONTENT 0.559322033898305 BASEPAIR 23 FREE_ENERGY
-25.30 LEN_BP_RATIO 2.56521739130435
GUCCACCGGGGUGUGGAAGGAGGUCUUGGAUUUCUCAUAUCCCUUCUUGUAUUCGGUCUGACU
GCA
>random_seq_from_cds__NO_9475 RANDOM_LENGTH 81 SEQ_LENGTH 70
GC_CONTENT 0.485714285714286 BASEPAIR 24 FREE_ENERGY
-17.40 LEN_BP_RATIO 2.91666666666667
CAGUUUGUUACUCUUGUUAAGUGCCUGUCCAUGUGUCAUGGCGUAAGUGAACUUCAGCUUCU
CGGGGUGCUGGCGAUA
>random_seq_from_cds__NO_9486 RANDOM_LENGTH 87 SEQ_LENGTH 68
GC_CONTENT 0.397058823529412 BASEPAIR 26 FREE_ENERGY
-16.60 LEN_BP_RATIO 2.61538461538462
ACUCGUCUUUAUACACAUUCAUCACUCUGAAUUUGAUUGACAUUCCUCGUAUGCUCAGACUCAU
GGCGUCAGGUAGGUAUGUGUAA
>random_seq_from_cds__NO_9487 RANDOM_LENGTH 81 SEQ_LENGTH 67
GC_CONTENT 0.477611940298507 BASEPAIR 22 FREE_ENERGY
-18.30 LEN_BP_RATIO 3.04545454545455
UGAUGCAAUGGCUGUUUGUAGUUGACAUUGGUAGCGACAUCUGGGCCAUCUUUGCAGCUGUGAU
GCUAACCAUGUCCCCA
>random_seq_from_cds__NO_9490 RANDOM_LENGTH 78 SEQ_LENGTH 66
GC_CONTENT 0.5 BASEPAIR 23 FREE_ENERGY -24.70 LEN_BP_RATIO
2.8695652173913
AUGUUUCUCGAUGCCUUGGCUGCAGUGAUGGGAAUAGCAUCGCCAGCACAUUGUUGCCCUUGGC
UAUUAAGUCAUAC
>random_seq_from_cds__NO_9500 RANDOM_LENGTH 100 SEQ_LENGTH 77
GC_CONTENT 0.506493506493506 BASEPAIR 25 FREE_ENERGY
-25.20 LEN_BP_RATIO 3.08
GAUGAACUGGGGCAGGUCUGGUGGCAGGUUGUAUUUGUGAAUAAUUCCUCUCCUUUGGCUUUGU
AAGCGAUCAUACUCCUCUGGGCCUGGUUAAUUU
>random_seq_from_cds__NO_9503 RANDOM_LENGTH 89 SEQ_LENGTH 64
GC_CONTENT 0.5625 BASEPAIR 23 FREE_ENERGY -22.40
LEN_BP_RATIO 2.78260869565217
UUUGUAUUCAACCAUCGCUCUGCAGCGCAUAUGCCUUCUUGGCAAGGUCCACAUUGAUGCUAUCA
GGGGGUAGCUGUAACUGUGUAAG
>random_seq_from_cds__NO_9519 RANDOM_LENGTH 84 SEQ_LENGTH 57
GC_CONTENT 0.473684210526316 BASEPAIR 21 FREE_ENERGY
-17.20 LEN_BP_RATIO 2.71428571428571
ACUUGGGCUUGUAGCAGAACAGGAGAGUCUGUAACUUGGGUGAAUUUUGUCUUAUCUGGAUGGAC
UUUGUAGGUGUGCGUCUUU
>random_seq_from_cds__NO_9521 RANDOM_LENGTH 99 SEQ_LENGTH 76
```

---

```
GC_CONTENT    0.434210526315789    BASEPAIR    29    FREE_ENERGY
-23.40    LEN_BP_RATIO    2.62068965517241
GUAUUCUGCUUUGUAGUUUUUCAUCACUGUUUUGAGCUGUGACUUUCAUGCAGUGUGAAUGGUAU
GGAUCCUCGAAGCUGCCUACAUAUAAUGUCCCAAAA
>random_seq_from_cds__NO_9523    RANDOM_LENGTH    95    SEQ_LENGTH    76
GC_CONTENT    0.460526315789474    BASEPAIR    28    FREE_ENERGY
-19.80    LEN_BP_RATIO    2.71428571428571
CUUUGCUUUUGUCUUUUCAUAGUUUUCCUUGUAUAGUUUCGUCACUUAGGGCAUCUCCUGCUGCC
UUCAGCUGCCUAAGCUGUGGGUUCUCUGAA
>random_seq_from_cds__NO_9526    RANDOM_LENGTH    88    SEQ_LENGTH    78
GC_CONTENT    0.371794871794872    BASEPAIR    24    FREE_ENERGY
-15.67    LEN_BP_RATIO    3.25
UGUGCUAAUGUUAUCAGCAUUCAUUCUGGCAUUUGCAACUUCAAAGCAAGGUGUCACUCCAUII
UGCCUUUGAUUUUAUUUUCAUAG
>random_seq_from_cds__NO_9528    RANDOM_LENGTH    102    SEQ_LENGTH    97
GC_CONTENT    0.556701030927835    BASEPAIR    32    FREE_ENERGY
-29.90    LEN_BP_RATIO    3.03125
AGCCAGAGGCGUGAAUUGAGCUUGCUGUUCAGCGAGACCUUUUUUUGUAGGCAACCAUCACUGAGA
GCUUUCUGGGCCUGGGCAACUCUCCUCAGUUCGGGC
>random_seq_from_cds__NO_9530    RANDOM_LENGTH    85    SEQ_LENGTH    73
GC_CONTENT    0.506849315068493    BASEPAIR    24    FREE_ENERGY
-21.10    LEN_BP_RATIO    3.04166666666667
CGGCCUGGACAAGUUCAGGGGCAUCAGGAGGAAGCAGGUACUUAUCCUUGGUGUCUCCCAGUUC
UGCUUGUAUAAAACCCUAC
>random_seq_from_cds__NO_9552    RANDOM_LENGTH    81    SEQ_LENGTH    64
GC_CONTENT    0.625    BASEPAIR    23    FREE_ENERGY    -31.30
LEN_BP_RATIO    2.78260869565217
UGUUCUGUUAACACCAGUCCCCUUGGCAGCACUCCACGGCUUGGCCAGGGGACGGCGGGGUCUUA
CAGGUCAUCUUUCCU
>random_seq_from_cds__NO_9559    RANDOM_LENGTH    110    SEQ_LENGTH    72
GC_CONTENT    0.513888888888889    BASEPAIR    24    FREE_ENERGY
-23.80    LEN_BP_RATIO    3
ACUGGUGUAAGCAAACCUAGAGUUUCUGACGCUGUCCAGCCCAACAACUAUCUCAUCAGGACAGA
GCCAGAACAAGGAACCCUCUAUUCACCAGAACAGACAUCUCUCA
>random_seq_from_cds__NO_9583    RANDOM_LENGTH    90    SEQ_LENGTH    64
GC_CONTENT    0.578125    BASEPAIR    22    FREE_ENERGY    -23.13
LEN_BP_RATIO    2.90909090909091
UAAAACCAUAUCUGACUCUUCUAGCAGAAAGUCCAACCCAGCCACCUUGGAAGGCUCUGCAGGG
UCUCUCCAGAACCUCUCUGCUGGCA
>random_seq_from_cds__NO_9585    RANDOM_LENGTH    68    SEQ_LENGTH    59
GC_CONTENT    0.474576271186441    BASEPAIR    20    FREE_ENERGY
-16.80    LEN_BP_RATIO    2.95
GAUAACGAUAGAGUUGUUUCUCCGUGGCAACAGCCUUGAGGAAUAUGGCACUAGAUGUUCGCAA
CAA
```

---

```
>random_seq_from_cds__NO_9589 RANDOM_LENGTH 99 SEQ_LENGTH 84
  GC_CONTENT 0.464285714285714 BASEPAIR 27 FREE_ENERGY
  -19.77 LEN_BP_RATIO 3.11111111111111
GCAAUUAUCGGGACCUCCGGAGCAUUUAUAAAAAGGGAUGGGUGGAAUCAGAACCAUUUUAUUACA
CCUGUGUCGACAUUGGAGCGAGACCGAUUCAAAU
>random_seq_from_cds__NO_9606 RANDOM_LENGTH 87 SEQ_LENGTH 63
  GC_CONTENT 0.46031746031746 BASEPAIR 22 FREE_ENERGY
  -16.55 LEN_BP_RATIO 2.86363636363636
CACUGGAUGCGCCAAGAAAUCUCUUUUGGAAAAUUAAAACUJACGAACAACAAAGGAGCUUCAA
UAACAAUGGCAGGAUGGUGGU
>random_seq_from_cds__NO_9644 RANDOM_LENGTH 88 SEQ_LENGTH 71
  GC_CONTENT 0.549295774647887 BASEPAIR 25 FREE_ENERGY
  -21.90 LEN_BP_RATIO 2.84
CUUUGGCUUGCUUCGUGGCCCUCCAACACCAGGUGAAGCUGUUAGUCCCAGUAUCUGAGGAAG
GGAUCACUGGUUUUUUUUUUUUU
>random_seq_from_cds__NO_9647 RANDOM_LENGTH 94 SEQ_LENGTH 68
  GC_CONTENT 0.338235294117647 BASEPAIR 23 FREE_ENERGY
  -16.30 LEN_BP_RATIO 2.95652173913043
CAGGACUUGACAACUUCUGGAAAUGAUUUUUUCAGUUGGGUAUCACCACUUAUCCAAUAACACG
AUACCAUUUCUUCAAAAAUGGUUGGAACU
>random_seq_from_cds__NO_9658 RANDOM_LENGTH 65 SEQ_LENGTH 54
  GC_CONTENT 0.62962962962963 BASEPAIR 20 FREE_ENERGY
  -22.00 LEN_BP_RATIO 2.7
CAGACUCCCUUCUCCAAGGUGCUCAGCAGCAGUUAACUGCCUGCAUGUCCCCGGAGGUGGCGAC
>random_seq_from_cds__NO_9664 RANDOM_LENGTH 110 SEQ_LENGTH 90
  GC_CONTENT 0.4 BASEPAIR 29 FREE_ENERGY -18.00 LEN_BP_RATIO
  3.10344827586207
AUGGAACUUACUCUCGCCUUCAGUUUGGAAACCUGCAGAAUUAUGAUUGCCAUGUUGGAUGAGAG
AUCACACAGGAAAAAUGGGAUUUAAUGCAUUCAAAGAGCUAUGGG
>random_seq_from_cds__NO_9673 RANDOM_LENGTH 81 SEQ_LENGTH 55
  GC_CONTENT 0.345454545454545 BASEPAIR 20 FREE_ENERGY
  -16.60 LEN_BP_RATIO 2.75
ACACUGAAGGCGGUGUUUUUUUCAAUUCUUUUUGAAAGAUCACCAAUUGCUUUCUUGUUUAACA
AUUUUUGCUGCAUCUG
>random_seq_from_cds__NO_9709 RANDOM_LENGTH 85 SEQ_LENGTH 66
  GC_CONTENT 0.454545454545455 BASEPAIR 22 FREE_ENERGY
  -18.66 LEN_BP_RATIO 3
AUAUUGGCUUUCUGAAUGGCUGUCUUGAAGGGCUUCUCCAGCUCAGUCUCAAGUGCUUCAUGAA
CCGCCUCUCCUUUCCAAUUC
>random_seq_from_cds__NO_9721 RANDOM_LENGTH 84 SEQ_LENGTH 66
  GC_CONTENT 0.484848484848485 BASEPAIR 20 FREE_ENERGY
  -19.26 LEN_BP_RATIO 3.3
GAUGAGCAACUGAAAUGAUUGUGUGCCCAUGCUGAAUCCUJACUCAGCACUUCUUGCACCAUGGC
UUCACUCUCAUUGUCCAGA
```

---

```
>random_seq_from_cds__NO_9723 RANDOM_LENGTH 69 SEQ_LENGTH 53
  GC_CONTENT 0.584905660377358 BASEPAIR 19 FREE_ENERGY
-16.50 LEN_BP_RATIO 2.78947368421053
UUCUGGCCACCACUCAUCUGGCCUCCUCCUUCUCCAACAAGGGUGUCAAAUUGCCUGUGGCAGGU
CCAU
>random_seq_from_cds__NO_9727 RANDOM_LENGTH 84 SEQ_LENGTH 63
  GC_CONTENT 0.4444444444444444 BASEPAIR 23 FREE_ENERGY
-21.70 LEN_BP_RATIO 2.73913043478261
UUUAAUGACCAUGUUGAGGUCAUUUAGAAUCCUUCACCUCUGGUCUGGAAGGAUAAUGGAAGGUC
ACAUUAUGGAAUUCAAUUU
>random_seq_from_cds__NO_9744 RANDOM_LENGTH 110 SEQ_LENGTH 74
  GC_CONTENT 0.662162162162162 BASEPAIR 28 FREE_ENERGY
-31.20 LEN_BP_RATIO 2.64285714285714
AGAUCCCGGGCGGGGGCACCGAGGGCUACCACGUUCUGCGGGGUACAAGAAAAUCCCCAGGACA
CAGAGCUGGUUUGGAGCCUUUCUUUGAUUUUUAUUGUUUCUAUUAA
>random_seq_from_cds__NO_9758 RANDOM_LENGTH 82 SEQ_LENGTH 70
  GC_CONTENT 0.642857142857143 BASEPAIR 25 FREE_ENERGY
-20.30 LEN_BP_RATIO 2.8
ACUCACUGUGGAUGUGACGCCCCCACUGCCAAGGCCCCACCACCGUUGAGGACAGAGUCGGCG
ACUCCACCCCAGUCAGC
>random_seq_from_cds__NO_9761 RANDOM_LENGTH 85 SEQ_LENGTH 71
  GC_CONTENT 0.408450704225352 BASEPAIR 25 FREE_ENERGY
-17.90 LEN_BP_RATIO 2.84
UGACAUAAGAACUUUCUUCCUGAGUAUACCCAUCAACUCUUUGGGGAUGAGUGAAACUGCUUUU
GGUUACAAGGGUCUAAAGAU
>random_seq_from_cds__NO_9774 RANDOM_LENGTH 81 SEQ_LENGTH 72
  GC_CONTENT 0.7361111111111111 BASEPAIR 26 FREE_ENERGY
-30.60 LEN_BP_RATIO 2.76923076923077
CCGCCGUGAUGGUGGUGGUGGUGAUGCGGCUGCGGGGUCUGAGUGGGGUGCAGCAGCGGCCCGU
GGCCUGCAGGUGUGAG
>random_seq_from_cds__NO_9779 RANDOM_LENGTH 82 SEQ_LENGTH 73
  GC_CONTENT 0.520547945205479 BASEPAIR 28 FREE_ENERGY
-27.70 LEN_BP_RATIO 2.60714285714286
CUGGAAACUGGAGUAGAUGGUGCGGGUUUCCGGACUUUCUUUGGCUUCCGUUCACUAUCCGAA
UUUCAGGCUCAAGGUCC
>random_seq_from_cds__NO_9780 RANDOM_LENGTH 68 SEQ_LENGTH 57
  GC_CONTENT 0.596491228070175 BASEPAIR 21 FREE_ENERGY
-22.20 LEN_BP_RATIO 2.71428571428571
UCCUUCUCCAGGCUCGUUGUUGGUCUGGGGACGAACUGGUUCCAUAGGGAGCGUAGGAGGUGUAGG
CGG
>random_seq_from_cds__NO_9781 RANDOM_LENGTH 81 SEQ_LENGTH 65
  GC_CONTENT 0.6 BASEPAIR 25 FREE_ENERGY -26.20 LEN_BP_RATIO
2.6
CGGUGUAGCCCAGGUCAUAGCUGCUCUUGGCGGAGUAAGGGACGUUGUUGAGGCCCGCUGGCUUGG
```

```
UACUGGUAGGAACCCA
>random_seq_from_cds__NO_9783 RANDOM_LENGTH 68 SEQ_LENGTH 59
  GC_CONTENT 0.711864406779661 BASEPAIR 19 FREE_ENERGY
  -27.10 LEN_BP_RATIO 3.10526315789474
ACCGGAAGGGUGGGCGACUCCUGGGGCUUGUGGAGGCUGCUGCUGCUGCUGUUGCCACCCGG
GCC
>random_seq_from_cds__NO_9793 RANDOM_LENGTH 97 SEQ_LENGTH 86
  GC_CONTENT 0.441860465116279 BASEPAIR 31 FREE_ENERGY
  -29.80 LEN_BP_RATIO 2.7741935483871
GAAGAUGGGCCUUAUGAAGUUGGUGGAGAGACUGAGCAUGAUGAAAGUCUCGUUCCUGUUCUGC
UAACAGUUACUUAGGGUUUUUCUUUGGACUCA
>random_seq_from_cds__NO_9811 RANDOM_LENGTH 84 SEQ_LENGTH 75
  GC_CONTENT 0.386666666666667 BASEPAIR 29 FREE_ENERGY
  -19.10 LEN_BP_RATIO 2.58620689655172
UUGCUGAAACCUUCCAGGUGUAUUUUGGAGGUACAGUUGUUGCGAGCAAGCUAUGAAAUCUGAA
GAUGAAGUGGGAAGUUUAA
>random_seq_from_cds__NO_9812 RANDOM_LENGTH 85 SEQ_LENGTH 65
  GC_CONTENT 0.461538461538462 BASEPAIR 20 FREE_ENERGY
  -15.01 LEN_BP_RATIO 3.25
UAGAGUAUGAAUUCAGGGGUAUAUAACUUAGGUAAACCUCUACAAACCUCGGCACAGCAACCU
GAACAUCAGUGGCCAAAAG
>random_seq_from_cds__NO_9817 RANDOM_LENGTH 89 SEQ_LENGTH 81
  GC_CONTENT 0.506172839506173 BASEPAIR 29 FREE_ENERGY
  -28.12 LEN_BP_RATIO 2.79310344827586
CUGCCGAAAUAUCAGGCUGCCAAUUGCAGGCACUCAGGGUUCGAGUGACUGUGUUUCCCUCAA
GACUGUAGCUCAGUAUUCGGGAGU
>random_seq_from_cds__NO_9824 RANDOM_LENGTH 84 SEQ_LENGTH 72
  GC_CONTENT 0.555555555555556 BASEPAIR 26 FREE_ENERGY
  -28.10 LEN_BP_RATIO 2.76923076923077
UGGGAUAGUGUCGAUAAAAACCCUUCGCACCCAGUUGGGCAUGACAUGGGUGCUGGGUGAGCGG
UGGUGUGUGUUGAUGACGA
>random_seq_from_cds__NO_9825 RANDOM_LENGTH 84 SEQ_LENGTH 70
  GC_CONTENT 0.471428571428571 BASEPAIR 22 FREE_ENERGY
  -18.00 LEN_BP_RATIO 3.18181818181818
UGACAGUGAUGAUGAUGGAGGCAAUGACGAACACCAUGGUGAACAGCAUGUAUUUCCAAUCAAG
GGCACAGCACUGGACGUGG
>random_seq_from_cds__NO_9831 RANDOM_LENGTH 68 SEQ_LENGTH 57
  GC_CONTENT 0.508771929824561 BASEPAIR 19 FREE_ENERGY
  -17.70 LEN_BP_RATIO 3
CUCACAGUAGCUUUUAAAGAUGGCUGGAGGUGUCCACGUGAUGUGGCCAGUGUACUGCAGGAGCA
CUU
>random_seq_from_cds__NO_9838 RANDOM_LENGTH 85 SEQ_LENGTH 68
  GC_CONTENT 0.867647058823529 BASEPAIR 26 FREE_ENERGY
  -47.00 LEN_BP_RATIO 2.61538461538462
```

---

CGGGGCGGGCGGGCGGGCGGGCAGCGGGCGGCUGCGGGCGGGCGGGCGGGCAGCCUCCGGCUUUGCG  
UACCCCGGGACCUCUGAGCG

>random\_seq\_from\_cds\_\_NO\_9841 RANDOM\_LENGTH 69 SEQ\_LENGTH 58  
GC\_CONTENT 0.672413793103448 BASEPAIR 20 FREE\_ENERGY  
-20.50 LEN\_BP\_RATIO 2.9

CCGUAUGUCGCACGGCGUGGGCUUACAGCAGAAUGCGCUCAAGUCAUCGCCGCACGCCUCGCUGG  
GAGG

>random\_seq\_from\_cds\_\_NO\_9853 RANDOM\_LENGTH 81 SEQ\_LENGTH 66  
GC\_CONTENT 0.757575757575758 BASEPAIR 23 FREE\_ENERGY  
-32.50 LEN\_BP\_RATIO 2.8695652173913

ACGCCGGGCUCCACGACCCUGCUCCAGGGGGCUCCUGCGCCCCUGGCUUCAAGGACGACACCAA  
GGGCCCGCUCAACUUG

>random\_seq\_from\_cds\_\_NO\_9858 RANDOM\_LENGTH 84 SEQ\_LENGTH 74  
GC\_CONTENT 0.662162162162162 BASEPAIR 25 FREE\_ENERGY  
-32.60 LEN\_BP\_RATIO 2.96

AACGACUUUGACGAGUGCGGCCAGAGCGCAGCCAGCAUGUACCUGCCGGGCGUGCGCCUACUAUGU  
GGCCCCGUCUGACUUCGCU

>random\_seq\_from\_cds\_\_NO\_9860 RANDOM\_LENGTH 87 SEQ\_LENGTH 79  
GC\_CONTENT 0.873417721518987 BASEPAIR 28 FREE\_ENERGY  
-48.70 LEN\_BP\_RATIO 2.82142857142857

CGGCCUGGAGCGCGCAAGUGGCCGUACCGCGGGCGGGCGGGCGGGCGGGCAGCGCGGGGGGGCGGCA  
GCAGCGGGGGCGGGCCCCGGCGG

>random\_seq\_from\_cds\_\_NO\_9885 RANDOM\_LENGTH 81 SEQ\_LENGTH 76  
GC\_CONTENT 0.815789473684211 BASEPAIR 28 FREE\_ENERGY  
-45.00 LEN\_BP\_RATIO 2.71428571428571

GCCUCUGCCUCCGAGCCCGGCCGCUACGUGCGCUCCUGGAUGGAGCCGCGUGCCCCGGCUUCCCGGG  
CGGUGCGGGCGGUGGC

>random\_seq\_from\_cds\_\_NO\_9903 RANDOM\_LENGTH 84 SEQ\_LENGTH 73  
GC\_CONTENT 0.520547945205479 BASEPAIR 21 FREE\_ENERGY  
-19.80 LEN\_BP\_RATIO 3.47619047619048

CCAAGAGCUGGAGGAAGACAGAGCCGAAGGCCUGACAAAUAUAAAUGGUCAUGAGUUCGUAUAUG  
GUGAACUCCAAGUAUGUGG

>random\_seq\_from\_cds\_\_NO\_9908 RANDOM\_LENGTH 75 SEQ\_LENGTH 69  
GC\_CONTENT 0.666666666666667 BASEPAIR 21 FREE\_ENERGY  
-21.40 LEN\_BP\_RATIO 3.28571428571429

GCCUCCGGGACGGCACUCAAGCAGCCGGCCGUGGUCUACCCUGGAUGAAGAAGGUGCACGUGA  
AUUCGGGUGA

>random\_seq\_from\_cds\_\_NO\_9910 RANDOM\_LENGTH 86 SEQ\_LENGTH 54  
GC\_CONTENT 0.611111111111111 BASEPAIR 20 FREE\_ENERGY  
-21.90 LEN\_BP\_RATIO 2.7

AAAAAGAAUUUCAUUUUUAACAGGUAUCUGACAAGGGCGCCGUCGGAUUGAAAUCGCUCACACCCUG  
UGUCUGUCGGAGCGCCAGAUC

>random\_seq\_from\_cds\_\_NO\_9931 RANDOM\_LENGTH 68 SEQ\_LENGTH 64  
GC\_CONTENT 0.75 BASEPAIR 25 FREE\_ENERGY -33.50

```
LEN_BP_RATIO 2.56
GGGCCUACGAACCGUGCCGCACCUGCCGCGGCAGCUGGGGGCGCGGACUACGGCUUCCUGGGG
UCC
>random_seq_from_cds__NO_9947 RANDOM_LENGTH 89 SEQ_LENGTH 77
GC_CONTENT 0.363636363636364 BASEPAIR 26 FREE_ENERGY
-16.50 LEN_BP_RATIO 2.96153846153846
UGUAGUUAAGAUUGUGAAUCUAGCUUGCAAUAUAUUCUUUGUAUCAUACCAAUUGGUGGGAGGA
ACAAGUGUUUCAUAUGGCCUGAUG
>random_seq_from_cds__NO_9973 RANDOM_LENGTH 75 SEQ_LENGTH 63
GC_CONTENT 0.507936507936508 BASEPAIR 22 FREE_ENERGY
-20.70 LEN_BP_RATIO 2.86363636363636
AAGGCUUGGAUCGUACUUUGGAGCUUCUGUCUGUGCUGUGGACCUCAAUGCAGAUGGCUUCUCAG
AUCUGCUCGU
>random_seq_from_cds__NO_9980 RANDOM_LENGTH 110 SEQ_LENGTH 91
GC_CONTENT 0.395604395604396 BASEPAIR 32 FREE_ENERGY
-19.20 LEN_BP_RATIO 2.84375
GUUGAAAAUGGAUGGCCUUCUGUGUGCAUAGAUCUAACACUUUGUUUCUCAUAUAAGGGCAAGGA
AGUCCAGGUUACAUAUGGUUUUGUUUAUAACAUGAGUUUGGAUG
>random_seq_from_cds__NO_9992 RANDOM_LENGTH 88 SEQ_LENGTH 59
GC_CONTENT 0.372881355932203 BASEPAIR 20 FREE_ENERGY
-17.40 LEN_BP_RATIO 2.95
UUUUAGCCCCAAACUGAUAAGCUGUUCAACAUUUUGGAUGUCCAGGACUACUACUGGAGAAUGC
CACUUUGAAAAUUAUCAAAAGAGU
>random_seq_from_cds__NO_10003 RANDOM_LENGTH 89 SEQ_LENGTH 68
GC_CONTENT 0.617647058823529 BASEPAIR 23 FREE_ENERGY
-37.80 LEN_BP_RATIO 2.95652173913043
CCCUCUGGUAUUCUGGGAGAAAUGGUGACCCUGGUAUUCAGGACAACCAGGGUCCCCUGGUU
CUCCUGGCCCCCCUGGAAUCUGUG
>random_seq_from_cds__NO_10004 RANDOM_LENGTH 94 SEQ_LENGTH 80
GC_CONTENT 0.5375 BASEPAIR 29 FREE_ENERGY -26.00
LEN_BP_RATIO 2.75862068965517
AAUCAUGCCCUACUGGUCCUCAGGAACUAUUCUCCCCAGUAUGAUUCAUAUGAUGUCAAGUCUGG
AGUAGCAGUAGGAGGACUCGCAGGCUAUC
>random_seq_from_cds__NO_10019 RANDOM_LENGTH 110 SEQ_LENGTH
104 GC_CONTENT 0.625 BASEPAIR 36 FREE_ENERGY -41.90
LEN_BP_RATIO 2.88888888888889
CCAUCUGGUCCCCGAGGUCAGCCUGGUGUCAUGGGCUUCCCCGGUCCUAAAGGAAAUGAUGGGUG
CUCCUGGUAAGAAUGGAGAACGAGGUGGCCUGGAGGACCUGGCC
>random_seq_from_cds__NO_10029 RANDOM_LENGTH 80 SEQ_LENGTH 70
GC_CONTENT 0.657142857142857 BASEPAIR 25 FREE_ENERGY
-30.60 LEN_BP_RATIO 2.8
UCCUGGUGCUCGUGGUCUUCUGGUCCUCCUGGUAGUAAUGGGUAACCCAGGACCCCCAGGUCC
CAGCGGUUCUCCAGG
>random_seq_from_cds__NO_10038 RANDOM_LENGTH 70 SEQ_LENGTH 56
```



---

GC\_CONTENT 0.607142857142857 BASEPAIR 20 FREE\_ENERGY  
-26.60 LEN\_BP\_RATIO 2.8  
GGCCCCAGAGGGACCUGUUGGACCCAGUGGACCUCUGGCAAAGAUGGAACCAGUGGACAUCAG  
GUCCC  
>random\_seq\_from\_cds\_\_NO\_10055 RANDOM\_LENGTH 81 SEQ\_LENGTH 66  
GC\_CONTENT 0.409090909090909 BASEPAIR 21 FREE\_ENERGY  
-16.90 LEN\_BP\_RATIO 3.14285714285714  
UUUACGUGGUACACUGGAUGGGUUUGCUGAAAUACAUGUUUCUCCUGUUUCAUGUUGCAGUAAA  
CUUUGAUUGCAUCUUC  
>random\_seq\_from\_cds\_\_NO\_10059 RANDOM\_LENGTH 85 SEQ\_LENGTH 65  
GC\_CONTENT 0.753846153846154 BASEPAIR 23 FREE\_ENERGY  
-38.30 LEN\_BP\_RATIO 2.82608695652174  
UGGCCAGGGGGACCCGGAGGGCCAGGUGGGCCAGGCUCACCAGGAGGGCCCCUCAGGUCCUGCUU  
CUCCUACACUGCCUCGUACA  
>random\_seq\_from\_cds\_\_NO\_10060 RANDOM\_LENGTH 81 SEQ\_LENGTH 68  
GC\_CONTENT 0.647058823529412 BASEPAIR 25 FREE\_ENERGY  
-37.22 LEN\_BP\_RATIO 2.72  
CCUGGAGGUCCA AUUGGCCCAAGUGGCCAGGGUUUCUUCUUUACCUGAAGGACCAACUGGGCC  
UGGAGGACCCUCUUGG  
>random\_seq\_from\_cds\_\_NO\_10063 RANDOM\_LENGTH 71 SEQ\_LENGTH 57  
GC\_CONTENT 0.649122807017544 BASEPAIR 21 FREE\_ENERGY  
-27.71 LEN\_BP\_RATIO 2.71428571428571  
GAACCCCGGAUCUCCUCUUUGUCCUGCAUCUCCUGGAGCACCCACAGGGCCAGGAGUCCAGGGG  
CACCCU  
>random\_seq\_from\_cds\_\_NO\_10065 RANDOM\_LENGTH 84 SEQ\_LENGTH 66  
GC\_CONTENT 0.606060606060606 BASEPAIR 24 FREE\_ENERGY  
-33.80 LEN\_BP\_RATIO 2.75  
GUUCCCCUACAGGACCAUUGGAGCCUGGGGGCCCCACAGGUCCAGGUGGACCUUUAUCUCCUGUU  
GCACCAGUUGGUCCUACUU  
>random\_seq\_from\_cds\_\_NO\_10066 RANDOM\_LENGTH 99 SEQ\_LENGTH 77  
GC\_CONTENT 0.649350649350649 BASEPAIR 26 FREE\_ENERGY  
-34.23 LEN\_BP\_RATIO 2.96153846153846  
UUCCUGGUGUUCGGCGUGGGCCUGGUAGGCCGGGCAUGCCUCUCUCCACGUUGCCCAGGCAU  
GCCAACAAUUCUCCUCUGCCCGGUCGUCCAGCU  
>random\_seq\_from\_cds\_\_NO\_10073 RANDOM\_LENGTH 81 SEQ\_LENGTH 63  
GC\_CONTENT 0.603174603174603 BASEPAIR 21 FREE\_ENERGY  
-21.60 LEN\_BP\_RATIO 3  
UUUUCUCCAGUAGGACCUGCCGGACCUGGAGGGCCCAAAGGACCUGGAAGACCCUCUUGCACCAU  
CAUUCCAGCUGUGCC  
>random\_seq\_from\_cds\_\_NO\_10085 RANDOM\_LENGTH 79 SEQ\_LENGTH 69  
GC\_CONTENT 0.666666666666667 BASEPAIR 25 FREE\_ENERGY  
-32.30 LEN\_BP\_RATIO 2.76  
ACCCUGAGGUCCUGGAGAUCCAGGAGGCCUGCUGAGCCAGGAGGACCAGAGGUACCUGGAGAGC  
CCCGUUGGGCCUUU

---

```
>random_seq_from_cds__NO_10133    RANDOM_LENGTH 95  SEQ_LENGTH    78
  GC_CONTENT    0.41025641025641 BASEPAIR    28  FREE_ENERGY
  -17.20 LEN_BP_RATIO  2.78571428571429
GGGUUUGCUUGGUGUACCAGAUGAGUAUGAGGAUAUUUUUGUAAAAUACAAAUUCACACUCUCC
AGAGCAGUAAUUGGCCUUUAUCUUUUAGG
>random_seq_from_cds__NO_10137    RANDOM_LENGTH 86  SEQ_LENGTH    72
  GC_CONTENT    0.4583333333333333  BASEPAIR    24  FREE_ENERGY
  -18.90 LEN_BP_RATIO  3
GGAUUCAGGUUGUUUGAGCCAAUJUUGCAACACUGUCUUCACAUCAUCAAUGCUCUGCCAAAUACCAG
UGCCUGGGUUCAUGUCAAGUU
>random_seq_from_cds__NO_10140    RANDOM_LENGTH 95  SEQ_LENGTH    57
  GC_CONTENT    0.43859649122807 BASEPAIR    21  FREE_ENERGY
  -16.80 LEN_BP_RATIO  2.71428571428571
UCCAUCCACUUGCAUUAGAAAAUCAGCACUCUGUAGGCAUGGUAUUGAUUGUUUCCGUUGUAGCG
UGAUAAUCGUCAUCUUCCAAAGAGCCAUCG
>random_seq_from_cds__NO_10144    RANDOM_LENGTH 80  SEQ_LENGTH    54
  GC_CONTENT    0.6666666666666667  BASEPAIR    19  FREE_ENERGY
  -21.90 LEN_BP_RATIO  2.84210526315789
GUCAGAUAUCCUCCGGGAGCUGCUCUGUGUCUCUGAGAAGGCUGCUAACAUUGCCCGGGCGUGCA
GACAGCAGGAAGCCC
>random_seq_from_cds__NO_10164    RANDOM_LENGTH 93  SEQ_LENGTH    65
  GC_CONTENT    0.430769230769231  BASEPAIR    21  FREE_ENERGY
  -20.33 LEN_BP_RATIO  3.0952380952381
UUCAGAAUGGUCCACCCAGGUGAAAGUUUUAUCCUCCGAGAUGGCUUUCACUGAAUCUUAUAAAA
AGGUGCCAGGCAUUUUUAUCCUUUAGCAA
>random_seq_from_cds__NO_10182    RANDOM_LENGTH 87  SEQ_LENGTH    68
  GC_CONTENT    0.382352941176471  BASEPAIR    19  FREE_ENERGY
  -15.57 LEN_BP_RATIO  3.57894736842105
GAGUAGGUUUUUCUCUUUGGAAACACGACCUAACUGUUCAUCCAGUUGUAUUAACAAGUUUUGAA
GAAGAAUCGUUGCCAUGGUUUC
>random_seq_from_cds__NO_10201    RANDOM_LENGTH 102 SEQ_LENGTH    89
  GC_CONTENT    0.550561797752809  BASEPAIR    31  FREE_ENERGY
  -35.40 LEN_BP_RATIO  2.87096774193548
UGGAGGCGUUGGUCCAGCCACCAUCUGUGCCAAGAAUCCUGCCAGAAACUCAUUGGAAGGGCAC
UGGAACGAACAGAUGCUGGAUAUAGCCUGCAGGCUUA
>random_seq_from_cds__NO_10202    RANDOM_LENGTH 80  SEQ_LENGTH    66
  GC_CONTENT    0.5303030303030303 BASEPAIR    27  FREE_ENERGY
  -28.00 LEN_BP_RATIO  2.44444444444444
UUCUGAAUGAAGUCUCCUUUUGGGCUCGCGCCAGGUGGGAAAGUGGAGUUCAAGAGGACUCUC
AUCAUCAGCUUCCUC
>random_seq_from_cds__NO_10214    RANDOM_LENGTH 102 SEQ_LENGTH    79
  GC_CONTENT    0.518987341772152  BASEPAIR    27  FREE_ENERGY
  -22.70 LEN_BP_RATIO  2.92592592592593
AGGCUGGAUUCAUGAACGAUGGCAGAAUCUUGGCCUGGACAUGGAGCAUUACAGCAAUGCAGGC
```

GCCUCCUUGGAUGAAUCAUUAUUCGGUGAUAGAAAUG  
>random\_seq\_from\_cds\_\_NO\_10223      RANDOM\_LENGTH 110 SEQ\_LENGTH  
    103 GC\_CONTENT      0.475728155339806      BASEPAIR    34 FREE\_ENERGY  
    -33.30 LEN\_BP\_RATIO    3.02941176470588  
UUCAGCUGUUGGAUACUUCAGGAGGUUAUGAGUCAGACAUGAACUGGGAGAAAGGCGAAGGCCAG  
CCCUUCGAAUACUUUGUUUAUGGAGCUGCCUGUUCGAGGUUGAA  
>random\_seq\_from\_cds\_\_NO\_10243      RANDOM\_LENGTH 80 SEQ\_LENGTH    67  
    GC\_CONTENT      0.492537313432836      BASEPAIR    24 FREE\_ENERGY  
    -23.00 LEN\_BP\_RATIO    2.79166666666667  
UCAUCUCGGCGGGUGACAUUUCACUAUAAGAGAAGCAGUCUGAGUUACUUUGGAGGUGUCUGUUC  
UCGCACAAGAGGAGU  
>random\_seq\_from\_cds\_\_NO\_10251      RANDOM\_LENGTH 110 SEQ\_LENGTH    94  
    GC\_CONTENT      0.48936170212766 BASEPAIR    35 FREE\_ENERGY  
    -24.40 LEN\_BP\_RATIO    2.68571428571429  
AACUGCGGGAAGGAUGGAGACCGGUGGAUUCAGUGCAGCAAACAGUGAUGUGUUCUGUGGAUUCU  
UACUCUGUACCAAUUCUACUCGAGCUCCACGUAUUGGUCAACUUC  
>random\_seq\_from\_cds\_\_NO\_10254      RANDOM\_LENGTH 84 SEQ\_LENGTH    77  
    GC\_CONTENT      0.571428571428571      BASEPAIR    23 FREE\_ENERGY  
    -22.26 LEN\_BP\_RATIO    3.34782608695652  
GGCCAUGGGGGUGUGUAGUAAUGAAGCCACUGCAUUUGUGAUUUCACCUGGGCAGGGACAGAUU  
GCAGUAUCCGGGAUCCAGU  
>random\_seq\_from\_cds\_\_NO\_10266      RANDOM\_LENGTH 97 SEQ\_LENGTH    81  
    GC\_CONTENT      0.62962962962963 BASEPAIR    30 FREE\_ENERGY  
    -35.20 LEN\_BP\_RATIO    2.7  
ACUGUCUUGGGGAUGAGACAACAGGAGCGGAUGGAGUCGCUGAGGCCCAUCCAUUGCUGGUAGU  
CGGGGUACUCCCCUCGCCGAGCAAGUAUUGU  
>random\_seq\_from\_cds\_\_NO\_10270      RANDOM\_LENGTH 64 SEQ\_LENGTH    52  
    GC\_CONTENT      0.596153846153846      BASEPAIR    21 FREE\_ENERGY  
    -21.20 LEN\_BP\_RATIO    2.47619047619048  
GGAUCCAGCUGCCCUCAGCACAUUGAGGGAGUGAAUUUCAGUGAGGUGGAAGCGGUCCUGAAC  
>random\_seq\_from\_cds\_\_NO\_10296      RANDOM\_LENGTH 64 SEQ\_LENGTH    57  
    GC\_CONTENT      0.491228070175439      BASEPAIR    22 FREE\_ENERGY  
    -21.70 LEN\_BP\_RATIO    2.59090909090909  
CCAUCAGCAAACCUUACAGGCCCUAUACAGGUACUUCAUGUCCUGUGAGGUUGUAGAGUGU  
>random\_seq\_from\_cds\_\_NO\_10311      RANDOM\_LENGTH 99 SEQ\_LENGTH    84  
    GC\_CONTENT      0.5 BASEPAIR    31 FREE\_ENERGY    -33.40 LEN\_BP\_RATIO  
    2.70967741935484  
GAAGGUUCCCCACAAUAGAAGUAGCAUCCAUAACAGCUUUGGCAACCAGCUGUUCUCUGUUG  
AGCCUGCUUCUGCGUGGACCUUCAGGAAUUUCAU  
>random\_seq\_from\_cds\_\_NO\_10317      RANDOM\_LENGTH 78 SEQ\_LENGTH    61  
    GC\_CONTENT      0.524590163934426      BASEPAIR    24 FREE\_ENERGY  
    -20.20 LEN\_BP\_RATIO    2.54166666666667  
UCUUGGCUGCAUCGUGAAGUGGUGAGUCAUUUGAUACCCGGUGGUGUUCACCAAUGCCUUAUGC  
UGGAGCAAUAUU

---

```
>random_seq_from_cds__NO_10334    RANDOM_LENGTH 85  SEQ_LENGTH    60
  GC_CONTENT    0.6666666666666667  BASEPAIR    24  FREE_ENERGY
  -36.70  LEN_BP_RATIO    2.5
GAUCCUCGGCUGCCGGUUCUCGGCUGCCGAUUAUCCGGCAUCAUGGUGCGGUCGGGGAAUAAGG
GCAGCUGUUGUGCUGUGUAU
>random_seq_from_cds__NO_10342    RANDOM_LENGTH 96  SEQ_LENGTH    72
  GC_CONTENT    0.5  BASEPAIR    24  FREE_ENERGY    -20.60  LEN_BP_RATIO
  3
GCAUUCCAUUCACUGGCCUGCCGACUGACCAUUGGCUCCAAUUUGUCUAUAAGGAUUGCAGCCU
AUAAAUCGGAUUCUACAGGAGAGAGUUAAAA
>random_seq_from_cds__NO_10385    RANDOM_LENGTH 88  SEQ_LENGTH    81
  GC_CONTENT    0.604938271604938  BASEPAIR    27  FREE_ENERGY
  -32.10  LEN_BP_RATIO    3
CGGCUGACCUGGUGGUGUUUGCUGAGCUGUUUGGAACCCAGGGGUGCUGAUCCAGGCUGAGGA
CCGCGUGCACCGCAUUGGACAGA
>random_seq_from_cds__NO_10391    RANDOM_LENGTH 70  SEQ_LENGTH    53
  GC_CONTENT    0.641509433962264  BASEPAIR    19  FREE_ENERGY
  -18.70  LEN_BP_RATIO    2.78947368421053
GUAACAUGGGCCAAACGUACCAAGAAAGUCGGGAUCGUCGGUAAAUACGGGACCCGCUAUGGGGC
CUCCC
>random_seq_from_cds__NO_10393    RANDOM_LENGTH 84  SEQ_LENGTH    59
  GC_CONTENT    0.627118644067797  BASEPAIR    23  FREE_ENERGY
  -25.00  LEN_BP_RATIO    2.56521739130435
GAAGAGACGAGCUGUGGGGAUCUGGCACUGUGGUUCCUGCAUGAAGACAGUGGCUGGCGUGCCU
GGACGUACAAGUACCACUU
>random_seq_from_cds__NO_10400    RANDOM_LENGTH 70  SEQ_LENGTH    58
  GC_CONTENT    0.620689655172414  BASEPAIR    21  FREE_ENERGY
  -27.70  LEN_BP_RATIO    2.76190476190476
GGCAGGGCCAAUGGGAUGAUGGAGUGCUGGUAGACCAGGGCAGACAGCGAUCCCGAAGUUUGGCU
CAUUG
>random_seq_from_cds__NO_10402    RANDOM_LENGTH 87  SEQ_LENGTH    69
  GC_CONTENT    0.565217391304348  BASEPAIR    24  FREE_ENERGY
  -24.50  LEN_BP_RATIO    2.875
CCUUUUUUUAUUCUGCUGCAUGAUGGUUGGAGGUGGCGAAGACACCUUCAUGGCCAGCCCGUACG
CGCCUCGGAAGGAGUGACUGUC
>random_seq_from_cds__NO_10406    RANDOM_LENGTH 110  SEQ_LENGTH
  101  GC_CONTENT    0.673267326732673  BASEPAIR    36  FREE_ENERGY
  -48.00  LEN_BP_RATIO    2.80555555555556
GUCUCCACUGACAUCUUCGCUUCUCUGGCAAGGCUGGUGUUGGGCUCCUUGCCGGAAGGCUG
CGGAGUCUGGUGACGGGGAGGUGGCAGGGCUGCUCAGGCCAGGGU
>random_seq_from_cds__NO_10409    RANDOM_LENGTH 89  SEQ_LENGTH    79
  GC_CONTENT    0.658227848101266  BASEPAIR    31  FREE_ENERGY
  -37.90  LEN_BP_RATIO    2.54838709677419
CCCAGGCUGGGGCUUCCAGGGCUGGCUAUUGCAUUGCUAUGAAGACCGGAGGCCAGGUUGCCUUG
```

GUGAGCCCCAGGGUGCCGGCCCCAG

>random\_seq\_from\_cds\_\_NO\_10422      RANDOM\_LENGTH 71    SEQ\_LENGTH      63  
GC\_CONTENT      0.587301587301587      BASEPAIR      26    FREE\_ENERGY  
-30.90    LEN\_BP\_RATIO    2.42307692307692

CUGGACAGGGGAGCGAACCCCAGGGCUACGAGGGGAUGUGGCUUCUGGAGACUGGUUCUCAUACU  
GUCCAU

>random\_seq\_from\_cds\_\_NO\_10424      RANDOM\_LENGTH 92    SEQ\_LENGTH      85  
GC\_CONTENT      0.588235294117647      BASEPAIR      28    FREE\_ENERGY  
-30.90    LEN\_BP\_RATIO    3.03571428571429

CUGCUACCCUGUGGGCCACCAGCCCUUCAAAUUCAAUGGCUCCUCCUCUGGAGUCCGGGAGGGG  
UCUGAAGUCGCUUCCUUUGGUGAGAGC

>random\_seq\_from\_cds\_\_NO\_10429      RANDOM\_LENGTH 110    SEQ\_LENGTH      98  
GC\_CONTENT      0.612244897959184      BASEPAIR      32    FREE\_ENERGY  
-35.10    LEN\_BP\_RATIO    3.0625

UGUGUAGUGGGGCAGCAGCGGAGGCUGGCUCAGGUCCAGCAUCAGCAUAUUGAGUGUUUCGAUG  
GACUGUCAAUCUCUGCUGGGAGGCUGCUCGCGGGAACUCAGGG

>random\_seq\_from\_cds\_\_NO\_10430      RANDOM\_LENGTH 71    SEQ\_LENGTH      61  
GC\_CONTENT      0.59016393442623      BASEPAIR      21    FREE\_ENERGY  
-24.30    LEN\_BP\_RATIO    2.9047619047619

AGACUGGGGAUGGGGUCUCUGCCAAUGGCUGAGGGCUGGGCCUGCUGGCUACAAGACUCUCCAA  
GUGGGC

>random\_seq\_from\_cds\_\_NO\_10433      RANDOM\_LENGTH 72    SEQ\_LENGTH      63  
GC\_CONTENT      0.6666666666666667      BASEPAIR      23    FREE\_ENERGY  
-34.50    LEN\_BP\_RATIO    2.73913043478261

GGAGGUGGUCACUGGCUGUGGCCAGGCUGGGUGGGCCCCUCCUCUGGUAGCCAGCUAAACCCU  
CCUGUGC

>random\_seq\_from\_cds\_\_NO\_10435      RANDOM\_LENGTH 67    SEQ\_LENGTH      54  
GC\_CONTENT      0.6666666666666667      BASEPAIR      20    FREE\_ENERGY  
-23.20    LEN\_BP\_RATIO    2.7

ACUUGUCCAGACCGUUGGUCAGUGGGGACAGGGCCUCUGGGUAGCCCCCUCACUGGUGUUGGUG  
AC

>random\_seq\_from\_cds\_\_NO\_10442      RANDOM\_LENGTH 71    SEQ\_LENGTH      66  
GC\_CONTENT      0.6515151515151515      BASEPAIR      23    FREE\_ENERGY  
-21.60    LEN\_BP\_RATIO    2.8695652173913

CCUCCCUCCAUGCCGUCAUCUCGAUGCCCACUGAAGUUGUCGUAGGAGUCCAGCGGAUGAGGGG  
GUCGGA

>random\_seq\_from\_cds\_\_NO\_10446      RANDOM\_LENGTH 72    SEQ\_LENGTH      55  
GC\_CONTENT      0.5818181818181818      BASEPAIR      20    FREE\_ENERGY  
-22.80    LEN\_BP\_RATIO    2.75

CAAGAGCAGUCCUGGCUCGAUGGUGAUGCAGACGCUAGUCUGGCUGUCUCCUGGGAUGUUGCUAG  
AUGCCAG

>random\_seq\_from\_cds\_\_NO\_10452      RANDOM\_LENGTH 87    SEQ\_LENGTH      62  
GC\_CONTENT      0.548387096774194      BASEPAIR      21    FREE\_ENERGY  
-20.30    LEN\_BP\_RATIO    2.95238095238095

GCCAAAUCCAGUACCCUUGGCAUGGAGCUUCGUGAUGUCAGGUCUCCGCUCAGAGAGGUUGAAC  
AGCCAGGUAGUUGCCUCAUGU

>random\_seq\_from\_cds\_\_NO\_10465      RANDOM\_LENGTH 71    SEQ\_LENGTH      58  
GC\_CONTENT      0.551724137931034      BASEPAIR    19    FREE\_ENERGY  
-17.71    LEN\_BP\_RATIO    3.05263157894737

CAGACCUCUCCUUAGUGUCCACCUGCCACACUUUCAAGAGGCCACUCAUGUCCCCUGUGGCCAC  
UAGAGU

>random\_seq\_from\_cds\_\_NO\_10469      RANDOM\_LENGTH 102    SEQ\_LENGTH      67  
GC\_CONTENT      0.611940298507463      BASEPAIR    21    FREE\_ENERGY  
-21.46    LEN\_BP\_RATIO    3.19047619047619

CGUUGCCUCUUCUCCUCUUCUCCUCAAGUCCACAUCUCCAUCCUGGGCCAGGUCAUCC  
UGGGUCCGGCGGACCGGGAUCAAGUUCUACCACCUCG

>random\_seq\_from\_cds\_\_NO\_10484      RANDOM\_LENGTH 87    SEQ\_LENGTH      68  
GC\_CONTENT      0.602941176470588      BASEPAIR    23    FREE\_ENERGY  
-25.60    LEN\_BP\_RATIO    2.95652173913043

AAAACCCACACUGUGGGCUCGUGGGCCAAAGUGGAACAGGUGAAGUUCGAUGCCACAUCCAUGC  
AUGUCAAGCCUCAGGUGGCUGC

>random\_seq\_from\_cds\_\_NO\_10499      RANDOM\_LENGTH 99    SEQ\_LENGTH      62  
GC\_CONTENT      0.532258064516129      BASEPAIR    20    FREE\_ENERGY  
-19.36    LEN\_BP\_RATIO    3.1

CCUGUCCAUUGAAGAUUUCACUCAGGCCUUUGGGAUGACUCCAGCUGCCUUCUCUGCUCUGCCUC  
GAUGGAAGCAACAAAACCUCAAGAAAGAAAAAGG

>random\_seq\_from\_cds\_\_NO\_10500      RANDOM\_LENGTH 90    SEQ\_LENGTH      71  
GC\_CONTENT      0.802816901408451      BASEPAIR    28    FREE\_ENERGY  
-47.40    LEN\_BP\_RATIO    2.53571428571429

ACUAUUUUGACAUGGCUGCGCUGGGCUGCGCGAGGCUGAGGUGGGCGCUGCGAGGGGCCGGCCGU  
GGCCUCUGCCCCACGGGGCCAGAG

>random\_seq\_from\_cds\_\_NO\_10506      RANDOM\_LENGTH 70    SEQ\_LENGTH      59  
GC\_CONTENT      0.559322033898305      BASEPAIR    22    FREE\_ENERGY  
-16.60    LEN\_BP\_RATIO    2.68181818181818

GGUGAUUGAUGACUUUAUGACUCGACUGGACCAGCUGCGGGCAGAGAGUGCUUCGGGAACCAGG  
UGUCG

>random\_seq\_from\_cds\_\_NO\_10509      RANDOM\_LENGTH 84    SEQ\_LENGTH      57  
GC\_CONTENT      0.526315789473684      BASEPAIR    22    FREE\_ENERGY  
-25.00    LEN\_BP\_RATIO    2.59090909090909

CCCGUGCUGCCUUUCUGGAAGCGAUACCUGGAUGGUUGGAAUGCCAUCUUUCCUUUGGGGAAGA  
AGCUGAUUGAUGAGAAGCU

>random\_seq\_from\_cds\_\_NO\_10526      RANDOM\_LENGTH 82    SEQ\_LENGTH      76  
GC\_CONTENT      0.684210526315789      BASEPAIR    25    FREE\_ENERGY  
-28.30    LEN\_BP\_RATIO    3.04

UGCGGAGCCACACGCGCACCGAGUGCAAUGCCACGGCUGUCGGGAUCAUGCGCGCUGCGCACC  
UGCUGGCAGAAGCUGCC

>random\_seq\_from\_cds\_\_NO\_10529      RANDOM\_LENGTH 97    SEQ\_LENGTH      84  
GC\_CONTENT      0.773809523809524      BASEPAIR    31    FREE\_ENERGY

---

-45.80 LEN\_BP\_RATIO 2.70967741935484  
ACGCGCGGUCGCGCCUGCAAUAGCAGCGCCCCGGACCUCAGCGGCUGCGACCUCUGUGCUGCGG  
CCGCGGGCACCGCCAGGAGAGCGUGCAGCUCG  
>random\_seq\_from\_cds\_\_NO\_10543 RANDOM\_LENGTH 84 SEQ\_LENGTH 78  
GC\_CONTENT 0.705128205128205 BASEPAIR 27 FREE\_ENERGY  
-39.40 LEN\_BP\_RATIO 2.88888888888889  
GGCAGCAUGUGCUGCGGCCGCGCCACAACAUCUGCGCCAGACGCGCAGCGAGCGCUGCCACUG  
CCGCUUCCACUGGUGCUGU  
>random\_seq\_from\_cds\_\_NO\_10545 RANDOM\_LENGTH 90 SEQ\_LENGTH 62  
GC\_CONTENT 0.580645161290323 BASEPAIR 21 FREE\_ENERGY  
-23.51 LEN\_BP\_RATIO 2.95238095238095  
CAGAGGUUUCUCCUGUCCCUGCUGCAGCUGCCACAUGUCAGCAUACACCCCACCUCGGGACAAC  
AGAGCCUCGUGUCCGUCUCCCUCUCC  
>random\_seq\_from\_cds\_\_NO\_10550 RANDOM\_LENGTH 73 SEQ\_LENGTH 65  
GC\_CONTENT 0.523076923076923 BASEPAIR 19 FREE\_ENERGY  
-21.14 LEN\_BP\_RATIO 3.42105263157895  
UCAUCCAGCUGUGACACGGCCGUAACGGAUUAUUGUCGGCGAUGGUGUCAUUAAGAGGACAGU  
GUCUUGG  
>random\_seq\_from\_cds\_\_NO\_10553 RANDOM\_LENGTH 110 SEQ\_LENGTH 92  
GC\_CONTENT 0.630434782608696 BASEPAIR 31 FREE\_ENERGY  
-35.92 LEN\_BP\_RATIO 2.96774193548387  
AAGACACGUCCUGCAGAGUCUCCCGCCCAUCGGCAUAGCUGAAGUGCACGUUCUCAAACUCAAU  
ACGGCCCUUCUGAAAGCGAAGGGGCCUCGCUCCAGGAAGGUCCUU  
>random\_seq\_from\_cds\_\_NO\_10554 RANDOM\_LENGTH 85 SEQ\_LENGTH 76  
GC\_CONTENT 0.460526315789474 BASEPAIR 25 FREE\_ENERGY  
-17.00 LEN\_BP\_RATIO 3.04  
CACCUUCUGUCUCCUCUUUCAGCAAGUCAACAUGUUCUCAUGUCAUGAAGUUGGUCUGGAUC  
AUCCUGUAGUAGGUGCCAA  
>random\_seq\_from\_cds\_\_NO\_10580 RANDOM\_LENGTH 85 SEQ\_LENGTH 72  
GC\_CONTENT 0.6805555555555556 BASEPAIR 29 FREE\_ENERGY  
-35.40 LEN\_BP\_RATIO 2.48275862068966  
UGACGAUGACGGUGCAGCCGUCUCCACACCAUCCUGCCAGAAGUCUGCGAUGGUAUGGGACAG  
CGGGCCUGCGUGGCUAUGU  
>random\_seq\_from\_cds\_\_NO\_10585 RANDOM\_LENGTH 110 SEQ\_LENGTH  
100 GC\_CONTENT 0.61 BASEPAIR 36 FREE\_ENERGY -37.90  
LEN\_BP\_RATIO 2.77777777777778  
GGACACACUGCUCACCCGUGAAGGCUCCGGUGGACCCUCUGCCCGGUUGAACAAGGACUUCGUGG  
CCAUGUGCUGGCGGCACAGGUCCCUGGUACUCAAGGUAGUGUCA  
>random\_seq\_from\_cds\_\_NO\_10590 RANDOM\_LENGTH 95 SEQ\_LENGTH 84  
GC\_CONTENT 0.630952380952381 BASEPAIR 28 FREE\_ENERGY  
-33.70 LEN\_BP\_RATIO 3  
CUCCAGCAGCUUCACUCCUGCAGCCAGGCUCAGGGCCUUCUGAUCAGUGACGAUGUAGCCAUAU  
UCCUCUGCUGGCGGGCUGAGGGCUGU  
>random\_seq\_from\_cds\_\_NO\_10594 RANDOM\_LENGTH 78 SEQ\_LENGTH 71

---

```
GC_CONTENT    0.647887323943662    BASEPAIR    26    FREE_ENERGY
-30.20    LEN_BP_RATIO    2.73076923076923
CAACCCUCCCCGGAUUUCUCCUGCACCCUUGGGCAGUAGCUGCAGCAGGGUCAGGAGUGUGGA
GAGCUGCUCAGGG
>random_seq_from_cds__NO_10599    RANDOM_LENGTH    82    SEQ_LENGTH    62
GC_CONTENT    0.693548387096774    BASEPAIR    21    FREE_ENERGY
-31.90    LEN_BP_RATIO    2.95238095238095
GGCAGGGGCUUCAGCCUUGGGCAGGGGGCCGACACUGACCAUCCUGGGGAGCCUCUGAGACCC
UGGAGCCAUCACGGGAG
>random_seq_from_cds__NO_10602    RANDOM_LENGTH    78    SEQ_LENGTH    69
GC_CONTENT    0.681159420289855    BASEPAIR    25    FREE_ENERGY
-26.90    LEN_BP_RATIO    2.76
GGGCAGCAGGGGCGGAGCCAGUGGGGAUGUCCUGUAAAAGCAGCUCUCCAGCAGGACCAGGUCUC
UUGGGUGCCAAGC
>random_seq_from_cds__NO_10621    RANDOM_LENGTH    81    SEQ_LENGTH    59
GC_CONTENT    0.440677966101695    BASEPAIR    20    FREE_ENERGY
-17.10    LEN_BP_RATIO    2.95
CAAAAAGCUAUGAUGGUGGAGGAGUUCUGGUCAUGAAGUACCUUGCUCUCGGGCUAAUAUCCA
UUUCUCAGUCUCCUUG
>random_seq_from_cds__NO_10633    RANDOM_LENGTH    95    SEQ_LENGTH    80
GC_CONTENT    0.55    BASEPAIR    27    FREE_ENERGY    -32.20
LEN_BP_RATIO    2.96296296296296
GGACAUCCGGGCUCAGUAUGAGACCAUCGCGGCUAAGAACAUUUCUGAAGCUGAGGAGUGGUACA
AGUCGAAGGGUGUCAGACCUGACCCAGGCA
>random_seq_from_cds__NO_10644    RANDOM_LENGTH    81    SEQ_LENGTH    72
GC_CONTENT    0.680555555555556    BASEPAIR    27    FREE_ENERGY
-32.90    LEN_BP_RATIO    2.66666666666667
CAAUAGCUCUGAGCCCCUGCUAGGCCUGCUGGCACUGUCACCGGGAGGACCCGUGGCUGUGCCCA
UGUCUUUGGGCCAUGC
>random_seq_from_cds__NO_10664    RANDOM_LENGTH    86    SEQ_LENGTH    65
GC_CONTENT    0.692307692307692    BASEPAIR    22    FREE_ENERGY
-31.10    LEN_BP_RATIO    2.95454545454545
ACAGCGGCUGACAUAAGGGGCGGAUCGCCUCUUCAGAGAGUGGCAUCAUGGGGAGGGGCGCAGCGC
UGGCCAGCCAGUAGGAUCUGU
>random_seq_from_cds__NO_10677    RANDOM_LENGTH    73    SEQ_LENGTH    68
GC_CONTENT    0.632352941176471    BASEPAIR    21    FREE_ENERGY
-26.64    LEN_BP_RATIO    3.23809523809524
GCCAGGUGAUCCGGAGGGACCCUUUUUAUCCCGGAGGACCUGGUAUCCUGGAUCCCCUGGAGG
CCUCUUGG
>random_seq_from_cds__NO_10683    RANDOM_LENGTH    98    SEQ_LENGTH    86
GC_CONTENT    0.523255813953488    BASEPAIR    24    FREE_ENERGY
-30.42    LEN_BP_RATIO    3.58333333333333
CUUGCAUCCCGGAGUUCUUUAUCACCCUCUUUCUCUGGGAAUCCAUCAUCUCCAGGAGGUCC
AGGUUCCCCAGGUGUUCUUUUUGUGAAAUGAU
```



---

```
>random_seq_from_cds__NO_10686    RANDOM_LENGTH 84 SEQ_LENGTH    74
  GC_CONTENT    0.662162162162162  BASEPAIR    27 FREE_ENERGY
  -40.10 LEN_BP_RATIO  2.74074074074074
ACCAGGCAGCCCCCGGGGUCCCCUUGGACCUGGAGGACCAGGUAGCCCAUCAUCUCCAAAGGGA
CCUGGGAUUCUGGGAGGC
>random_seq_from_cds__NO_10715    RANDOM_LENGTH 110 SEQ_LENGTH    89
  GC_CONTENT    0.651685393258427  BASEPAIR    31 FREE_ENERGY
  -49.50 LEN_BP_RATIO  2.87096774193548
UGAAAGCCCAAUGGGUCCUGGGGCUCCCAGGGGUCCAAUUGGACCCUGUGGCCUGGUGGUCCUG
GUGGACCCCGAGACCCCUUUUCAGGAACACAGUGGCAAACAGAG
>random_seq_from_cds__NO_10728    RANDOM_LENGTH 74 SEQ_LENGTH    57
  GC_CONTENT    0.526315789473684  BASEPAIR    19 FREE_ENERGY
  -17.60 LEN_BP_RATIO  3
CCCCUAUUGCUUCUGUGCCUGGAUCCACUAAUACGGGUACUGUCCGGGAUCAGAGAAAGACAGG
UGACUCGAU
>random_seq_from_cds__NO_10734    RANDOM_LENGTH 86 SEQ_LENGTH    65
  GC_CONTENT    0.415384615384615  BASEPAIR    23 FREE_ENERGY
  -16.70 LEN_BP_RATIO  2.82608695652174
AUCAGGAAGGUGGAGGUCUCUAUGCACUAGGUCUUAUUCAUGCCAAUCAUGGUGGUGAUUAAU
GACUAUCUGCUUAAUCAGCUU
>random_seq_from_cds__NO_10756    RANDOM_LENGTH 110 SEQ_LENGTH    69
  GC_CONTENT    0.550724637681159  BASEPAIR    20 FREE_ENERGY
  -18.30 LEN_BP_RATIO  3.45
UUAUUUCCAUCAAUUUCACCGUCUCCAUGGCCUCCUUUGGCAUCCUCCUCACUGUUGAAGUCUA
CAAACCAAACCCCUUUGGAGGACCCAGUUUCCCGUCAGUAACU
>random_seq_from_cds__NO_10773    RANDOM_LENGTH 84 SEQ_LENGTH    67
  GC_CONTENT    0.567164179104478  BASEPAIR    21 FREE_ENERGY
  -24.30 LEN_BP_RATIO  3.19047619047619
UGUGGCUCCCUUCUUGCCAGGUGUGGUAACUGCUUUGGCUGGUGUAACUGUCUUCUUGGCAGGUG
UUGCUGCUGCCUUUUUGCC
>random_seq_from_cds__NO_10778    RANDOM_LENGTH 84 SEQ_LENGTH    75
  GC_CONTENT    0.666666666666667  BASEPAIR    25 FREE_ENERGY
  -33.30 LEN_BP_RATIO  3
AUCCCAGGUUGAGGAGGAGAACCCGACUUCUGGAACCGCGAGGCAGCCGAGGCCUGGGUGCCG
CCAAGAAGCUGCAGCCUGC
>random_seq_from_cds__NO_10788    RANDOM_LENGTH 86 SEQ_LENGTH    73
  GC_CONTENT    0.575342465753425  BASEPAIR    28 FREE_ENERGY
  -29.50 LEN_BP_RATIO  2.60714285714286
UGGAGGGGUGGUCGCAUCGACCAUGGUCAUCAUGAAAGCAGGGCUUACCGGGCACUGACUGAGAC
GAUCAUGUUCGACGACGCCAU
>random_seq_from_cds__NO_10794    RANDOM_LENGTH 72 SEQ_LENGTH    57
  GC_CONTENT    0.719298245614035  BASEPAIR    21 FREE_ENERGY
  -28.00 LEN_BP_RATIO  2.71428571428571
GCGUUGCUUCCUCUGCUGGCCGGACCCUGCUGCUGCUGGAGACGGCCACUGCUCCUGACAUGC
```

AGGGGCC

>random\_seq\_from\_cds\_\_NO\_10823      RANDOM\_LENGTH 82    SEQ\_LENGTH      73  
GC\_CONTENT      0.657534246575342      BASEPAIR      24    FREE\_ENERGY  
-31.92    LEN\_BP\_RATIO    3.04166666666667

CCCUGAUGGAGAUGACAGAGGCUGCCUGCGCCUGCUGAGCAGGAACCCCGCGGCUUCUACCUC  
UUUGUGGAGGGGCGGCC

>random\_seq\_from\_cds\_\_NO\_10825      RANDOM\_LENGTH 86    SEQ\_LENGTH      68  
GC\_CONTENT      0.602941176470588      BASEPAIR      23    FREE\_ENERGY  
-25.71    LEN\_BP\_RATIO    2.95652173913043

CCAGCUCACCAGCGAGGAGACACGCUGACCCUCGUCACCGCUGACCACUCCCAUGUCUUCUCCU  
UUGGUGGCUACACCUUGCGAG

>random\_seq\_from\_cds\_\_NO\_10833      RANDOM\_LENGTH 77    SEQ\_LENGTH      72  
GC\_CONTENT      0.6527777777777778      BASEPAIR      26    FREE\_ENERGY  
-36.90    LEN\_BP\_RATIO    2.76923076923077

UGUGUGUACUUGAGCCGGGAAGUGGGUGCUCUGGGCCGUGCUCCCGCACCCACUUCUGAUAGGC  
CGUGGUAGGCCA

>random\_seq\_from\_cds\_\_NO\_10835      RANDOM\_LENGTH 90    SEQ\_LENGTH      72  
GC\_CONTENT      0.5972222222222222      BASEPAIR      27    FREE\_ENERGY  
-27.80    LEN\_BP\_RATIO    2.66666666666667

GAAGUUGUCAUAGAGACGGACGAUGCACUCAGCCUUUCGCAGGAAGCGGCUGUAGGAGGCCUCCG  
UCCACCAGUGCAGCAGGUUCCUGA

>random\_seq\_from\_cds\_\_NO\_10842      RANDOM\_LENGTH 106    SEQ\_LENGTH      79  
GC\_CONTENT      0.708860759493671      BASEPAIR      29    FREE\_ENERGY  
-44.30    LEN\_BP\_RATIO    2.72413793103448

AGAGGGCGCCAAGCGCCAUGCCAAAGUGGCGAUUGGCCUGGCCCAAGCAGACCCGGGCCAGCUCC  
UGUGGCUUGUCGCUGCCCUCCAUCUCCUGUGCCAGCUCGUG

>random\_seq\_from\_cds\_\_NO\_10844      RANDOM\_LENGTH 89    SEQ\_LENGTH      79  
GC\_CONTENT      0.582278481012658      BASEPAIR      25    FREE\_ENERGY  
-21.00    LEN\_BP\_RATIO    3.16

AUGUAGUCUGUCGCCAGCAGCACCACCUCUCCUCUGAGAAGUCCUCCUGGAAGAUCUGGUC  
UAGCAGCCACUCCACCGCAACGU

>random\_seq\_from\_cds\_\_NO\_10863      RANDOM\_LENGTH 85    SEQ\_LENGTH      77  
GC\_CONTENT      0.584415584415584      BASEPAIR      26    FREE\_ENERGY  
-29.20    LEN\_BP\_RATIO    2.96153846153846

AGGAGAACCGCACCUACCCCGUGGAGUGGAUCAUCAUUGAUCCUGAAGGCUUCACAGGAGAACGG  
GGAGUGGGAGAUAGUCCACC

>random\_seq\_from\_cds\_\_NO\_10866      RANDOM\_LENGTH 71    SEQ\_LENGTH      58  
GC\_CONTENT      0.586206896551724      BASEPAIR      20    FREE\_ENERGY  
-23.10    LEN\_BP\_RATIO    2.9

AGGUGGUGAGAAGACAUCAGUGGCCAUCUCGGUGCUCCUGGCUCAGUCUGUCUCCUGCUGCUCA  
UCUCCA

>random\_seq\_from\_cds\_\_NO\_10869      RANDOM\_LENGTH 81    SEQ\_LENGTH      69  
GC\_CONTENT      0.710144927536232      BASEPAIR      24    FREE\_ENERGY  
-30.50    LEN\_BP\_RATIO    2.875

CUGCCGGAGCUCCUGCACAUGUCCCGCCCAGCAGAGGAUGGACCCAGCCCUGGGGCCCUUGGUGCG  
GAGGAGCAGCUCCUG

>random\_seq\_from\_cds\_\_NO\_10888      RANDOM\_LENGTH 77    SEQ\_LENGTH      49  
GC\_CONTENT      0.673469387755102      BASEPAIR    19    FREE\_ENERGY  
-24.60    LEN\_BP\_RATIO    2.57894736842105

CUGAAGCAAGCCUCCAGCUGAGUACCUGCCUCAGUGACAUGGCAGCCAGCGGGAAGACCAGCA  
AGUCCGAACCGA

>random\_seq\_from\_cds\_\_NO\_10891      RANDOM\_LENGTH 79    SEQ\_LENGTH      69  
GC\_CONTENT      0.594202898550725      BASEPAIR    19    FREE\_ENERGY  
-17.14    LEN\_BP\_RATIO    3.63157894736842

UCACUCUGACCUGCGCCUCCGCUAUGGCCAAGAGGACAUGACGUGAUCGGCUUGACCUUCCGC  
AGGGACCUGUACUU

>random\_seq\_from\_cds\_\_NO\_10898      RANDOM\_LENGTH 94    SEQ\_LENGTH      69  
GC\_CONTENT      0.434782608695652      BASEPAIR    24    FREE\_ENERGY  
-17.00    LEN\_BP\_RATIO    2.875

UAACACAGAGAAGACCGUGAAGAAGAUUAAAGCAUUCGGUGGAACAGGUGGCCAAUGUGGUUCUC  
UACUCGAGUGAUUAAUACGUCAAGCCCGU

>random\_seq\_from\_cds\_\_NO\_10899      RANDOM\_LENGTH 86    SEQ\_LENGTH      71  
GC\_CONTENT      0.577464788732394      BASEPAIR    23    FREE\_ENERGY  
-23.04    LEN\_BP\_RATIO    3.08695652173913

GGCUAUGGAGGAAGCGCAGAGAAAAGUGCCACCAAACAGCACUUUGACCAAGACGCUGACGCUG  
CUGCCCUUGCUGGCCUAACAAU

>random\_seq\_from\_cds\_\_NO\_10904      RANDOM\_LENGTH 70    SEQ\_LENGTH      62  
GC\_CONTENT      0.741935483870968      BASEPAIR    24    FREE\_ENERGY  
-31.40    LEN\_BP\_RATIO    2.58333333333333

GACGUUGAUGAGUGACAUGGCCCGGGCCCUGUGCCGCCUCCCGCGGCGCGGCCUCUGGCUGCUCC  
UGGGC

>random\_seq\_from\_cds\_\_NO\_10906      RANDOM\_LENGTH 82    SEQ\_LENGTH      78  
GC\_CONTENT      0.641025641025641      BASEPAIR    27    FREE\_ENERGY  
-30.90    LEN\_BP\_RATIO    2.88888888888889

CAGUUCAGGUAGACAUGGAGGCCGUCGGGAGACGCUGUGGUGUGACUGGGGCAGGACCAUCAG  
GGAGCUACAGGGAGCUG

>random\_seq\_from\_cds\_\_NO\_10907      RANDOM\_LENGTH 68    SEQ\_LENGTH      61  
GC\_CONTENT      0.639344262295082      BASEPAIR    21    FREE\_ENERGY  
-26.80    LEN\_BP\_RATIO    2.9047619047619

GCCGACUGCACCUGGCACAUGGCGGAGAAGCUGGGCUGCUUCUGGCCCAAUGCAGAGGUGGACAG  
GUU

>random\_seq\_from\_cds\_\_NO\_10910      RANDOM\_LENGTH 94    SEQ\_LENGTH      81  
GC\_CONTENT      0.679012345679012      BASEPAIR    24    FREE\_ENERGY  
-35.20    LEN\_BP\_RATIO    3.375

GCACUGAGGGCAUUGUGUAGCAUGGCGGAGGGCGGCAGCCCAGACGGGCGGGCAGGGCCGGGCUC  
CGCAGGGUCGUAAUCUGAAGGAGUGGCUG

>random\_seq\_from\_cds\_\_NO\_10924      RANDOM\_LENGTH 78    SEQ\_LENGTH      66  
GC\_CONTENT      0.46969696969697    BASEPAIR    23    FREE\_ENERGY

-21.30 LEN\_BP\_RATIO 2.8695652173913  
AUCUCCAUGACUUUCUCCAUGGAACGGACAGCGUUUGCAUUGGGUCUUUGCUGUAAAACCUUUUC  
UGGGAGAGGAUCA

>random\_seq\_from\_cds\_\_NO\_10928      RANDOM\_LENGTH 77    SEQ\_LENGTH      65  
GC\_CONTENT      0.723076923076923      BASEPAIR    22    FREE\_ENERGY  
-30.80 LEN\_BP\_RATIO 2.95454545454545

GGGGGGUCCAGGCCCGCGGUGAAAGCCAUGUUGACGUUGAAACCCACGCCGGGCCCUUGGCCA  
CCCUCAUCAGGA

>random\_seq\_from\_cds\_\_NO\_10934      RANDOM\_LENGTH 68    SEQ\_LENGTH      55  
GC\_CONTENT      0.636363636363636      BASEPAIR    21    FREE\_ENERGY  
-23.00 LEN\_BP\_RATIO 2.61904761904762

CGGUUGAGGGGUUCGUGCCAUAACAGGAGGGUGUGGGCUUCCGAGUGCACCGUCUGUAGCUCCUC  
CAG

>random\_seq\_from\_cds\_\_NO\_10945      RANDOM\_LENGTH 69    SEQ\_LENGTH      51  
GC\_CONTENT      0.666666666666667      BASEPAIR    19    FREE\_ENERGY  
-19.90 LEN\_BP\_RATIO 2.68421052631579

GUGCUUGUGCCGGCGGCUGCUCCAGUAAGACCAUGUGCUGCAGAAGAGGGCUGUGCGCUGCCCCU  
CCGU

>random\_seq\_from\_cds\_\_NO\_10953      RANDOM\_LENGTH 71    SEQ\_LENGTH      58  
GC\_CONTENT      0.586206896551724      BASEPAIR    22    FREE\_ENERGY  
-25.50 LEN\_BP\_RATIO 2.63636363636364

CAGUAGCGAGGGUCGUGGAAAUGCAGUGGUUCAGAUUCCGGUGGGCCAGCGCCUUCUUUUUAUU  
GAGGAC

>random\_seq\_from\_cds\_\_NO\_10976      RANDOM\_LENGTH 72    SEQ\_LENGTH      51  
GC\_CONTENT      0.705882352941177      BASEPAIR    20    FREE\_ENERGY  
-29.20 LEN\_BP\_RATIO 2.55

ACGGGAUGGCCAGAGGCCGGGUACCUCCCCGAGGUCAUGGGUGACGGCCUGGCCAACCAAGAUCAA  
CAACCCC

>random\_seq\_from\_cds\_\_NO\_10982      RANDOM\_LENGTH 88    SEQ\_LENGTH      76  
GC\_CONTENT      0.671052631578947      BASEPAIR    28    FREE\_ENERGY  
-39.40 LEN\_BP\_RATIO 2.71428571428571

UCCUGCUGGGGCCUGGUCCUCCAACCUGCCUCCUCGCAUCAUGGCAGCCGGGGGGCUGCAGAUG  
AUCGGGUCCAUGAGCAAGGAUUAU

>random\_seq\_from\_cds\_\_NO\_10984      RANDOM\_LENGTH 92    SEQ\_LENGTH      82  
GC\_CONTENT      0.670731707317073      BASEPAIR    30    FREE\_ENERGY  
-34.50 LEN\_BP\_RATIO 2.73333333333333

CCUGGAGGCCGCCUGGUCAAUGUGCUGGAGCCUGGGACUCCUCCUGGUUGGGGCCAAUGGCA  
UUUGGGGGCAGCGAGCCGUGGACAUCG

>random\_seq\_from\_cds\_\_NO\_10986      RANDOM\_LENGTH 75    SEQ\_LENGTH      58  
GC\_CONTENT      0.672413793103448      BASEPAIR    22    FREE\_ENERGY  
-24.40 LEN\_BP\_RATIO 2.63636363636364

CCUGGCCAGCACAAGCCAGUGCUGUCGUUUCUUAACCCACGGGGAGUCGUCCACCGGCGUGCUGC  
AGCCCCUUGA

>random\_seq\_from\_cds\_\_NO\_10987      RANDOM\_LENGTH 88    SEQ\_LENGTH      67

---

GC\_CONTENT 0.686567164179104 BASEPAIR 23 FREE\_ENERGY  
-34.60 LEN\_BP\_RATIO 2.91304347826087  
UGGCUUCGGGGAACUCUGCCACAGGGUACAAGUGCCUGCUCUCCUGGUGGAUUCGGUGGCAUCCCUG  
GGCGGGACCCCUUUACAUGGA  
>random\_seq\_from\_cds\_\_NO\_10991 RANDOM\_LENGTH 89 SEQ\_LENGTH 75  
GC\_CONTENT 0.746666666666667 BASEPAIR 31 FREE\_ENERGY  
-37.70 LEN\_BP\_RATIO 2.41935483870968  
GCACCGCGAGGCCGCGCGUAUCUGCAUGGGCGCCUGCAGGCACUGGGGUGCAGCUCUUCGUGA  
AGGACCCGGGCGCUCCGGCUUCCC  
>random\_seq\_from\_cds\_\_NO\_10999 RANDOM\_LENGTH 68 SEQ\_LENGTH 59  
GC\_CONTENT 0.745762711864407 BASEPAIR 22 FREE\_ENERGY  
-34.80 LEN\_BP\_RATIO 2.68181818181818  
UGGGCCACACGCCUGAGGCCGUGCAGAUCCGCGGAAGGAACGCCGCGCGCCUCUGCUGUGUG  
GCC  
>random\_seq\_from\_cds\_\_NO\_11000 RANDOM\_LENGTH 84 SEQ\_LENGTH 74  
GC\_CONTENT 0.756756756756757 BASEPAIR 29 FREE\_ENERGY  
-39.80 LEN\_BP\_RATIO 2.55172413793103  
AGCCGUGACGCCGCCUCUCUGGGGCGAGCGCCCGGGACCUCACCGAGGAGGCCAUCGGUGGUGC  
CGUGCAGGGACUGGGCCAC  
>random\_seq\_from\_cds\_\_NO\_11006 RANDOM\_LENGTH 84 SEQ\_LENGTH 60  
GC\_CONTENT 0.7 BASEPAIR 23 FREE\_ENERGY -30.60 LEN\_BP\_RATIO  
2.60869565217391  
GUCCACGAACCCAGAGGAGGCUGCUGUAGACCCCGUGGAGGCCAGGUGCCUGGUGGGCCCUU  
CAGCCGUCUGCAGCCUCGG  
>random\_seq\_from\_cds\_\_NO\_11009 RANDOM\_LENGTH 80 SEQ\_LENGTH 74  
GC\_CONTENT 0.72972972972973 BASEPAIR 28 FREE\_ENERGY  
-33.10 LEN\_BP\_RATIO 2.64285714285714  
UGGACCCGCGCAGCUGGACAGAGCCUGGGUGAUCUACGAGGGCCCCAGCGGCUACUCCGACCUG  
GCGUCCAUCGGGCCG  
>random\_seq\_from\_cds\_\_NO\_11010 RANDOM\_LENGTH 71 SEQ\_LENGTH 60  
GC\_CONTENT 0.633333333333333 BASEPAIR 22 FREE\_ENERGY  
-30.50 LEN\_BP\_RATIO 2.72727272727273  
GCUCCUGAGGGGGCCUGGUUUUGCCUGCCUGUACGAGAGCGGGGCCAGGACCUCCUAUGAUGA  
GAUUUC  
>random\_seq\_from\_cds\_\_NO\_11019 RANDOM\_LENGTH 82 SEQ\_LENGTH 71  
GC\_CONTENT 0.535211267605634 BASEPAIR 23 FREE\_ENERGY  
-21.54 LEN\_BP\_RATIO 3.08695652173913  
UCUCAGACAUGGUGGUCCUCGAUCAACCAAGACUCAUUACUGAGGACAAGGAAGGGGGCCUUU  
CACUGUGACUCUGUUUC  
>random\_seq\_from\_cds\_\_NO\_11030 RANDOM\_LENGTH 87 SEQ\_LENGTH 64  
GC\_CONTENT 0.5 BASEPAIR 22 FREE\_ENERGY -17.20 LEN\_BP\_RATIO  
2.90909090909091  
UGUUUGUAGGAGCCACUGAUUCAGCCGUGCCAUGUGCAAUGAUGUUGGAACUUGCUCGUGCCUUA  
GACAAGAAACUCCUUUCCUUA

---

```
>random_seq_from_cds__NO_11045    RANDOM_LENGTH 75  SEQ_LENGTH    60
  GC_CONTENT    0.45  BASEPAIR    22  FREE_ENERGY    -23.40
  LEN_BP_RATIO  2.72727272727273
GGGAUUUUUGCUGGAUACAGAAAAUUUCCCUUGGCAGUAUUCUGUCAGGGAGUUUGUGUCUGGAA
UAGCAACAGG
>random_seq_from_cds__NO_11059    RANDOM_LENGTH 110 SEQ_LENGTH
106 GC_CONTENT    0.367924528301887  BASEPAIR    32  FREE_ENERGY
-23.90 LEN_BP_RATIO  3.3125
ACUUUAUCCAACAGCUCGAUUGCCAAAGACCGUGUCAAAUGUUGUGUUACAAAAGGAUGCCUGUA
AUAUUUUUUCAGCAGUAGGUCUUUUUUUCGGAUUUUUGGUAAGUG
>random_seq_from_cds__NO_11065    RANDOM_LENGTH 80  SEQ_LENGTH    73
  GC_CONTENT    0.465753424657534  BASEPAIR    24  FREE_ENERGY
-15.40 LEN_BP_RATIO  3.04166666666667
GCAAUUUGCAGUUCUGACAGAGGUCCAGUUACCGUGAUAAAUAUCCUGUAAAGAACCACCUCCAC
AAAACUCCAUGCAAA
>random_seq_from_cds__NO_11068    RANDOM_LENGTH 86  SEQ_LENGTH    68
  GC_CONTENT    0.588235294117647  BASEPAIR    24  FREE_ENERGY
-25.90 LEN_BP_RATIO  2.83333333333333
CCGAUGCGCUGAAUCAGCUCGAAGUCCUCCUGCGGGUUCGGCGGGACAAAUCGAAGCCGGGGUU
CAUCUCAUUUGUUUUUGGGCU
>random_seq_from_cds__NO_11071    RANDOM_LENGTH 92  SEQ_LENGTH    82
  GC_CONTENT    0.51219512195122  BASEPAIR    27  FREE_ENERGY
-23.10 LEN_BP_RATIO  3.03703703703704
GAAUCGGAGGUCAGUUUAGUUGGUGUGGCAAUAUGAUAGGUGGUGCUUCUGUGGAAACCACAGG
CUUUAAUCCCCUGCGGGCUAUAGGCCU
>random_seq_from_cds__NO_11074    RANDOM_LENGTH 90  SEQ_LENGTH    68
  GC_CONTENT    0.720588235294118  BASEPAIR    22  FREE_ENERGY
-26.50 LEN_BP_RATIO  3.09090909090909
ACCAGGAGGCUGUCAUCAGGGGCCAGGCUCAGGCGCCGUCCCCCAUUGUCACCACCGAGGAGCC
CUCCCAGCUGCCACAGCCACACGUC
>random_seq_from_cds__NO_11087    RANDOM_LENGTH 87  SEQ_LENGTH    81
  GC_CONTENT    0.567901234567901  BASEPAIR    24  FREE_ENERGY
-27.15 LEN_BP_RATIO  3.375
ACAUCUUGGGCACCACAUCUCCACGGUACAGCAGGCAGCAGGCCAUGUACUUGCCGUGCCGGGG
AUCACACUUUACCAUCUGGUUG
>random_seq_from_cds__NO_11089    RANDOM_LENGTH 77  SEQ_LENGTH    66
  GC_CONTENT    0.606060606060606  BASEPAIR    25  FREE_ENERGY
-22.00 LEN_BP_RATIO  2.64
UGACUGGUGCAUAGGUGGCCAGGGGAAGUGGAUGCGAGGGUAGGGCACCAGGUUGGUCUGGAAC
UCUGUCAGGUCC
>random_seq_from_cds__NO_11102    RANDOM_LENGTH 82  SEQ_LENGTH    64
  GC_CONTENT    0.46875  BASEPAIR    20  FREE_ENERGY    -16.00
  LEN_BP_RATIO  3.2
GAAAUUUCUGAACGAAUUGUACAGUGGCCUGCAAUAGACGUACAAACCUCUGUUGGACAAAGCUG
```

GUUUGGGAUCCAUAACU

>random\_seq\_from\_cds\_\_NO\_11108      RANDOM\_LENGTH 87    SEQ\_LENGTH      57  
GC\_CONTENT      0.56140350877193    BASEPAIR      20    FREE\_ENERGY  
-20.40    LEN\_BP\_RATIO    2.85

CUACAACAGUUUUUAAGGAGAUACUGCUUGGCUGUACUGCGGCAACUCCACCUAGUAAGGACCCA  
AGACAGCAAAGUACUCCCCAGG

>random\_seq\_from\_cds\_\_NO\_11116      RANDOM\_LENGTH 72    SEQ\_LENGTH      59  
GC\_CONTENT      0.542372881355932    BASEPAIR      19    FREE\_ENERGY  
-22.10    LEN\_BP\_RATIO    3.10526315789474

AUCGUGGCACAGUUGCCUAAAUGCCGAGAGUGUCGCUUGGACAGUCUCCGCAAGGAUAAGGAGCA  
ACAGAAG

>random\_seq\_from\_cds\_\_NO\_11121      RANDOM\_LENGTH 85    SEQ\_LENGTH      78  
GC\_CONTENT      0.525641025641026    BASEPAIR      24    FREE\_ENERGY  
-17.86    LEN\_BP\_RATIO    3.25

ACUGGGUGUGUCCUCGGUGUGGGUUUGGAGUAUGUGUGGACUGCUACCGGAUGAAGAGAAAGAAU  
UGCCAACAGGGGUGCUGCUU

>random\_seq\_from\_cds\_\_NO\_11125      RANDOM\_LENGTH 84    SEQ\_LENGTH      58  
GC\_CONTENT      0.620689655172414    BASEPAIR      22    FREE\_ENERGY  
-28.40    LEN\_BP\_RATIO    2.63636363636364

GAAAAACCGACUCUUGGUGCAGUGCUCAGCAGAAUCCUCAGUGUUGGAGCCAGCAGCUGUGGG  
UGGGGAAGCAGCCUCCAAG

>random\_seq\_from\_cds\_\_NO\_11140      RANDOM\_LENGTH 77    SEQ\_LENGTH      56  
GC\_CONTENT      0.428571428571429    BASEPAIR      22    FREE\_ENERGY  
-18.60    LEN\_BP\_RATIO    2.54545454545455

UCAUUUAGAAAACGUCUUCAUCAAGAGUAUGGAGUUCAAGGCUGGGCUAUUGUACAGUUUCUUGG  
GGAUGUGGUGUU

>random\_seq\_from\_cds\_\_NO\_11146      RANDOM\_LENGTH 84    SEQ\_LENGTH      67  
GC\_CONTENT      0.462686567164179    BASEPAIR      22    FREE\_ENERGY  
-22.00    LEN\_BP\_RATIO    3.04545454545455

AAAAGGGGCCUUCUGUGGAUUGGGGAAAAAUCCAGAGACCCCUGAAGAUUCGGAUUCAACCCUA  
UGAAAAGAUAAAGGCCAGG

>random\_seq\_from\_cds\_\_NO\_11190      RANDOM\_LENGTH 84    SEQ\_LENGTH      70  
GC\_CONTENT      0.528571428571429    BASEPAIR      25    FREE\_ENERGY  
-18.90    LEN\_BP\_RATIO    2.8

CCUGCUGCUGUAAUUGUGGAGAAGCCACUGAGUGUACCACCAGCCCAAGGACUUUCCAUUCAGU  
GAUUGGCGCAAGAAGUUGA

>random\_seq\_from\_cds\_\_NO\_11205      RANDOM\_LENGTH 81    SEQ\_LENGTH      56  
GC\_CONTENT      0.410714285714286    BASEPAIR      21    FREE\_ENERGY  
-18.32    LEN\_BP\_RATIO    2.66666666666667

UUUCAGCCUCACUUGAUCAAUGUUGAAGGAGUUGGUGUUGCUGAAUUGCUUUUUAACACAAUUCA  
GGCAGCUGACAUUGAU

>random\_seq\_from\_cds\_\_NO\_11208      RANDOM\_LENGTH 87    SEQ\_LENGTH      70  
GC\_CONTENT      0.485714285714286    BASEPAIR      26    FREE\_ENERGY  
-19.70    LEN\_BP\_RATIO    2.69230769230769

GGUAUUCUGGGUGGUGCAGUUCUAGCGGAUAUCAUGAAAGACAAAGACAACUUUUGGAUGACCC  
GACAAGAGUACCAAGAAAAGGG

>random\_seq\_from\_cds\_\_NO\_11209      RANDOM\_LENGTH 73    SEQ\_LENGTH      64  
GC\_CONTENT      0.46875      BASEPAIR      21    FREE\_ENERGY      -18.40  
LEN\_BP\_RATIO    3.04761904761905

UGUCCGUGUGCUAGAGAAACUUGGUGUGACUGUUCGAUAAGAUGAAGUUCACAGAUUGUCUUUGC  
UGGACUUC

>random\_seq\_from\_cds\_\_NO\_11217      RANDOM\_LENGTH 88    SEQ\_LENGTH      76  
GC\_CONTENT      0.592105263157895      BASEPAIR      26    FREE\_ENERGY  
-34.10    LEN\_BP\_RATIO    2.92307692307692

UCCUGGGCUGCCCGACUGGCAUUGGGCUUCACAUUCCAAGAAUACCUCCUGUGUGAAUAGUCCUC  
UCCAGGGGGACCAGGAGGAGGGA

>random\_seq\_from\_cds\_\_NO\_11226      RANDOM\_LENGTH 84    SEQ\_LENGTH      65  
GC\_CONTENT      0.6    BASEPAIR      20    FREE\_ENERGY      -20.74    LEN\_BP\_RATIO  
3.25

AAACGAGUCCCAGGCAUCCGCUGUCCAACUGGGAGAUAGUCUUUCCACCCUUUCGGGGAUGUGGU  
UUCCGCCCUUCUUCUUGGC

>random\_seq\_from\_cds\_\_NO\_11258      RANDOM\_LENGTH 84    SEQ\_LENGTH      62  
GC\_CONTENT      0.516129032258065      BASEPAIR      21    FREE\_ENERGY  
-17.20    LEN\_BP\_RATIO    2.95238095238095

GUUAUAGAAGGUGAUGGUGUCUCUGCUCUAAUAAGGCCUGGUGCGUGAACUGCUUUGCCUGUU  
CUACCUUGCAACACUAAAUU

>random\_seq\_from\_cds\_\_NO\_11261      RANDOM\_LENGTH 84    SEQ\_LENGTH      67  
GC\_CONTENT      0.477611940298507      BASEPAIR      23    FREE\_ENERGY  
-18.90    LEN\_BP\_RATIO    2.91304347826087

UCAGUUUGGCCUCUACAAAAUCCGUUUGAGGAAAUCUCGAGUAUAGUCUGAGACAUGAGGUGGC  
AGCUUUGGGUUUGUUGGCU

>random\_seq\_from\_cds\_\_NO\_11291      RANDOM\_LENGTH 88    SEQ\_LENGTH      78  
GC\_CONTENT      0.512820512820513      BASEPAIR      28    FREE\_ENERGY  
-23.70    LEN\_BP\_RATIO    2.78571428571429

AUUCGCACUGAGUUUGACCAGGAGAUUGACAUGGGCUCACUGAACCCGGGAAAGCAACUGGUUUG  
AGAAGAUGAUCAGUGGGAUGUAC

>random\_seq\_from\_cds\_\_NO\_11294      RANDOM\_LENGTH 80    SEQ\_LENGTH      72  
GC\_CONTENT      0.7083333333333333      BASEPAIR      24    FREE\_ENERGY  
-26.60    LEN\_BP\_RATIO    3

GGAGGACUGCGUGGCCACUCACCGGAUCUGCCAGAUCGUGUCCACACGCUCGCCAGCCUGUGCG  
CAGCCACCCUGGCCG

>random\_seq\_from\_cds\_\_NO\_11299      RANDOM\_LENGTH 82    SEQ\_LENGTH      69  
GC\_CONTENT      0.652173913043478      BASEPAIR      20    FREE\_ENERGY  
-19.80    LEN\_BP\_RATIO    3.45

CAAGGAGACUCAUGCCAGUGCCCCGUCAAGAUGCUGCCACCUACGUGUGUCUACCCCGGACG  
GCACAGGAGAAAGGGGA

>random\_seq\_from\_cds\_\_NO\_11312      RANDOM\_LENGTH 84    SEQ\_LENGTH      61  
GC\_CONTENT      0.540983606557377      BASEPAIR      23    FREE\_ENERGY



---

-21.20 LEN\_BP\_RATIO 2.65217391304348  
CAGCUUUGCCAAAGUCAUGCAUGAGACAGUGAAGGACCUGGCUCCGAAAUGUGAUGUGUCUUUCC  
UGCAGUCAGAGGAUGGCAG  
>random\_seq\_from\_cds\_\_NO\_11314 RANDOM\_LENGTH 68 SEQ\_LENGTH 60  
GC\_CONTENT 0.766666666666667 BASEPAIR 23 FREE\_ENERGY  
-33.60 LEN\_BP\_RATIO 2.60869565217391  
AGCGGCUGGAAGCGCGGGGCGGCCGGGAGGGGCGAGUCCUCGCCGGCGAGUUCAGCGGACAUCCA  
GGC  
>random\_seq\_from\_cds\_\_NO\_11318 RANDOM\_LENGTH 87 SEQ\_LENGTH 58  
GC\_CONTENT 0.603448275862069 BASEPAIR 22 FREE\_ENERGY  
-32.70 LEN\_BP\_RATIO 2.63636363636364  
UGGGCGGAAAAGGUGUGAGCGGUACUGGGCCCAGGAGCAGGAGCCACUGCAGACUGGGCUUUUC  
UGCAUCACUCUGGAUAAAGGAG  
>random\_seq\_from\_cds\_\_NO\_11322 RANDOM\_LENGTH 79 SEQ\_LENGTH 74  
GC\_CONTENT 0.567567567567568 BASEPAIR 25 FREE\_ENERGY  
-25.60 LEN\_BP\_RATIO 2.96  
GGCAGCUGCUCUGACCCAGGAUGAUCCCACCUGACUUCAGUCUCUUUGAUGUGGUCCUUAAGAU  
GAGGAAGCAGCGGC  
>random\_seq\_from\_cds\_\_NO\_11342 RANDOM\_LENGTH 93 SEQ\_LENGTH 68  
GC\_CONTENT 0.426470588235294 BASEPAIR 27 FREE\_ENERGY  
-19.10 LEN\_BP\_RATIO 2.51851851851852  
UCAAAUCCUCCAUUUUGUUGGUCUGUUCUUGCAUGCUAGUUUAGAGGAUCUUUAAGCAAGCGA  
CAAUGAAGGCAUUGCGGAAAAAAUCUGU  
>random\_seq\_from\_cds\_\_NO\_11354 RANDOM\_LENGTH 81 SEQ\_LENGTH 65  
GC\_CONTENT 0.461538461538462 BASEPAIR 20 FREE\_ENERGY  
-17.10 LEN\_BP\_RATIO 3.25  
CUUUGGAGUCUGGUUUUGAAUCUGUUGGAUCUAUACUCUGAAGUACCUGCAGGGCUCUAUCCAUC  
UUAUCCCUCAUCUAUA  
>random\_seq\_from\_cds\_\_NO\_11384 RANDOM\_LENGTH 83 SEQ\_LENGTH 61  
GC\_CONTENT 0.409836065573771 BASEPAIR 21 FREE\_ENERGY  
-17.30 LEN\_BP\_RATIO 2.9047619047619  
AACUGCAUUUGUUAUAGCUGCUAUUAUAAAAGUGAGGAGGCCAAACGCCAACAAUUGGGAUAG  
AGAAAAGAAGCUGUUCUUC  
>random\_seq\_from\_cds\_\_NO\_11387 RANDOM\_LENGTH 84 SEQ\_LENGTH 71  
GC\_CONTENT 0.507042253521127 BASEPAIR 28 FREE\_ENERGY  
-24.10 LEN\_BP\_RATIO 2.53571428571429  
ACGUGGCUAGAAACUUGGCUGUGGAGCAGUUAACACUGAGUGAAGAAUCCCAGUGCCCCAGCU  
GUGUUACAGCAGACUUUCU  
>random\_seq\_from\_cds\_\_NO\_11394 RANDOM\_LENGTH 80 SEQ\_LENGTH 65  
GC\_CONTENT 0.738461538461539 BASEPAIR 22 FREE\_ENERGY  
-26.50 LEN\_BP\_RATIO 2.95454545454545  
GUCCGGCCUUUAGAGCGCUCCCAGCGAACACAGUCCCAGUCCUGCGGGGUGGGGGCCCCUGCCA  
GCUGCCAGGCCCUU  
>random\_seq\_from\_cds\_\_NO\_11396 RANDOM\_LENGTH 80 SEQ\_LENGTH 72

---

GC\_CONTENT 0.666666666666667 BASEPAIR 27 FREE\_ENERGY  
-36.60 LEN\_BP\_RATIO 2.666666666666667  
UGGCAGUUCUGGGUGUCACGGGUACUUUAGGGGCGUGGCACUCCCCUCCUUUGGGUGCCUCC  
GUUCGGGCUGUCGCC  
>random\_seq\_from\_cds\_\_NO\_11397 RANDOM\_LENGTH 84 SEQ\_LENGTH 75  
GC\_CONTENT 0.573333333333333 BASEPAIR 28 FREE\_ENERGY  
-33.00 LEN\_BP\_RATIO 2.67857142857143  
AGGGACCUCGACUGGGCUUGGGGGAUCUAGCAUAGCUUUCUGGGUUUCGCCCAACCUUUGCUGA  
UUUGACCUGGUCCCUGGAA  
>random\_seq\_from\_cds\_\_NO\_11407 RANDOM\_LENGTH 100 SEQ\_LENGTH 83  
GC\_CONTENT 0.55421686746988 BASEPAIR 28 FREE\_ENERGY  
-28.10 LEN\_BP\_RATIO 2.96428571428571  
CAUGGGGAUACCUCUGCUGGGACCUGAAGCACCAGAGUGAAGCAGACAUACUGUGAAUCCUGGUC  
CUCUGCAGUGGCAGGAUGCAAAGUGAUGUAGAUCU  
>random\_seq\_from\_cds\_\_NO\_11421 RANDOM\_LENGTH 89 SEQ\_LENGTH 75  
GC\_CONTENT 0.466666666666667 BASEPAIR 27 FREE\_ENERGY  
-22.80 LEN\_BP\_RATIO 2.77777777777778  
GAUUUUCUGUAGCUGCCACUGACAUAUAUGGAGAUGAGUUAUGCAGAUGUGUUUAUUGGAGCACC  
UCUCUUCAUGGAUCGUGGCUCUGA  
>random\_seq\_from\_cds\_\_NO\_11441 RANDOM\_LENGTH 82 SEQ\_LENGTH 71  
GC\_CONTENT 0.492957746478873 BASEPAIR 22 FREE\_ENERGY  
-20.12 LEN\_BP\_RATIO 3.22727272727273  
UUGGGGUUGUGGAGUUGCUCAGUGCUUGAAGAUUGUCUGCCAAGUUGGGAGAUUAGACAGAGGAA  
AGAGUGCAAUCUUGUAC  
>random\_seq\_from\_cds\_\_NO\_11449 RANDOM\_LENGTH 89 SEQ\_LENGTH 81  
GC\_CONTENT 0.604938271604938 BASEPAIR 28 FREE\_ENERGY  
-35.20 LEN\_BP\_RATIO 2.89285714285714  
CUGAAGGGAGCCAGAUGGGGGGCGUGGUUGUGCUGAGUGGAGGGGGCACCUCUGGCCGGAUGGCAU  
UCCUCAUGUCGGGUGUCCUUAAU  
>random\_seq\_from\_cds\_\_NO\_11450 RANDOM\_LENGTH 85 SEQ\_LENGTH 60  
GC\_CONTENT 0.55 BASEPAIR 22 FREE\_ENERGY -22.60  
LEN\_BP\_RATIO 2.72727272727273  
CAGCUGAUGAAAGGUCUGGGACAGAAACCUCUUACACCUACCUCAUUGCAGGUGGUGACAGGGU  
CUGUGGUGGCCUCUAGGGAG  
>random\_seq\_from\_cds\_\_NO\_11464 RANDOM\_LENGTH 69 SEQ\_LENGTH 60  
GC\_CONTENT 0.6 BASEPAIR 21 FREE\_ENERGY -18.50 LEN\_BP\_RATIO  
2.85714285714286  
GGACAGUCCAAGGCUCGAUGCAUCGAGAGCCUCCUCCGAGCGAUCCACUUUCCCCAGCCACUGUC  
AGAU  
>random\_seq\_from\_cds\_\_NO\_11481 RANDOM\_LENGTH 81 SEQ\_LENGTH 65  
GC\_CONTENT 0.492307692307692 BASEPAIR 21 FREE\_ENERGY  
-19.13 LEN\_BP\_RATIO 3.0952380952381  
AAGAAACUCAUCCUUAUGCUCUGGAGCAGUGUGUAAAGUCGACACCGUCUUGCUCUGAGAAAA  
CAUCACCAAAGAGGGA

---

```
>random_seq_from_cds__NO_11515    RANDOM_LENGTH 78 SEQ_LENGTH    55
  GC_CONTENT    0.418181818181818  BASEPAIR    20 FREE_ENERGY
  -16.50 LEN_BP_RATIO    2.75
UGUUUUCCUUCUAUGAAAGGUCGCUAGAGAAGUCCGACUCUUCUAUCUUUGAUGGAGUCGUAACAAG
AAUCACAAACCCG
>random_seq_from_cds__NO_11537    RANDOM_LENGTH 89 SEQ_LENGTH    69
  GC_CONTENT    0.3333333333333333  BASEPAIR    27 FREE_ENERGY
  -19.80 LEN_BP_RATIO    2.55555555555556
UUUUUUUGAUCCAGUUGAAAGUGAUGAAGACAUAAACAAAUGUUCAUGAUGAUGAGCUGGAUUCAA
ACAAAGAAGAUGAUGAAAUUGCUG
>random_seq_from_cds__NO_11546    RANDOM_LENGTH 68 SEQ_LENGTH    59
  GC_CONTENT    0.525423728813559  BASEPAIR    22 FREE_ENERGY
  -15.40 LEN_BP_RATIO    2.68181818181818
AAAGUUGUGUCAAAUCUGCCAGCCAUAAACCAUGGAGGAAGUAGCCCCAGUGAGUGUUAGUGAUGC
AGC
>random_seq_from_cds__NO_11560    RANDOM_LENGTH 88 SEQ_LENGTH    67
  GC_CONTENT    0.567164179104478  BASEPAIR    22 FREE_ENERGY
  -23.36 LEN_BP_RATIO    3.04545454545455
AACAUGCCCCACAAGUUCGGUAUCCACAACUACAAGGUCCCUACCUUCUGCGAUCACUGUGGGUC
CCUGCUCUGGGGACUCUUGCGGC
>random_seq_from_cds__NO_11565    RANDOM_LENGTH 110 SEQ_LENGTH
  104 GC_CONTENT    0.490384615384615  BASEPAIR    35 FREE_ENERGY
  -33.80 LEN_BP_RATIO    2.97142857142857
UGGGCCUGGAUGAGUUCAACUUCUAUCAAGGUGUUGGGCAAAGGCAGCUUUGGCAAGGGUCAUGUU
GGCAGAACUCAAGGGCAAAGAUGAAGUAUAUGCUGUGAAGGUCUU
>random_seq_from_cds__NO_11577    RANDOM_LENGTH 97 SEQ_LENGTH    81
  GC_CONTENT    0.481481481481481  BASEPAIR    28 FREE_ENERGY
  -25.80 LEN_BP_RATIO    2.89285714285714
CGAUGAAGGCCAGGGAUAAAUUUCAAGAGUUGCUUUCGGACACUCCCUUUCUGCUCUUCGGGG
CAGGGUCCCAAACAUGCUUGAUAGUUGCCCU
>random_seq_from_cds__NO_11585    RANDOM_LENGTH 110 SEQ_LENGTH    91
  GC_CONTENT    0.54945054945055  BASEPAIR    29 FREE_ENERGY
  -36.82 LEN_BP_RATIO    3.13793103448276
GCUUGCAGGCCAGCACAGUGAGCUGGGCUGUCCUCCUGUAUUUUGCAUAUCAAGUGAACAUUUC
CGAGGAGCAGGCAUUCUGAUUCUGGGGCCUGUAAGACCUGAAUUU
>random_seq_from_cds__NO_11595    RANDOM_LENGTH 78 SEQ_LENGTH    69
  GC_CONTENT    0.521739130434783  BASEPAIR    27 FREE_ENERGY
  -19.80 LEN_BP_RATIO    2.55555555555556
UCUUCAUGGUCAUGAUGUCCCCAUAGCAGCCGUGGUACAGGCGUGGAUGUAGGUGAGGCUUCAU
GAGUGACUGAAGG
>random_seq_from_cds__NO_11607    RANDOM_LENGTH 90 SEQ_LENGTH    47
  GC_CONTENT    0.595744680851064  BASEPAIR    20 FREE_ENERGY
  -27.50 LEN_BP_RATIO    2.35
UCCCUAUGAUCCAACACCAUAUUGAAGCCUGUGCCCAGGGUCCUGGAAUGCAGGAGAUUCUGCU
```

```
CAUUGGCUUCUACCAACCUGAUGAG
>random_seq_from_cds__NO_11610    RANDOM_LENGTH 88  SEQ_LENGTH    80
  GC_CONTENT    0.575  BASEPAIR    23  FREE_ENERGY    -22.90
  LEN_BP_RATIO  3.47826086956522
UGCUCCGACUCCCCUUGAGUGCUAUGUUGGAAGCCCACCGACGCCAGCGUCACCCUUCUUACU
CCUUGGCACUACGGGCUAACAGG
>random_seq_from_cds__NO_11613    RANDOM_LENGTH 72  SEQ_LENGTH    61
  GC_CONTENT    0.655737704918033  BASEPAIR    19  FREE_ENERGY
-22.10  LEN_BP_RATIO  3.21052631578947
AAUCAGCAGGAUGGGCAAUUGGGAGGACUCACCAGGCUUGUGGCCAGGGGCAGGUACCAUCCGCC
UAGAGCA
>random_seq_from_cds__NO_11616    RANDOM_LENGTH 79  SEQ_LENGTH    71
  GC_CONTENT    0.676056338028169  BASEPAIR    26  FREE_ENERGY
-31.30  LEN_BP_RATIO  2.73076923076923
UCCGAGGGGAUUGUGUACAUCCACCCGACCGCCAAGGUGGCCCCUCGGCUGUGGCUGGGCCCCA
ACGUCUCCAUCGGG
>random_seq_from_cds__NO_11637    RANDOM_LENGTH 110 SEQ_LENGTH    91
  GC_CONTENT    0.373626373626374  BASEPAIR    34  FREE_ENERGY
-27.00  LEN_BP_RATIO  2.67647058823529
ACAUACGCAGGGUAAGUGGUAUCGAUAAUAAUAUCCGAACAACGGGAUUCUUAGCUCCAGCCCU
UUGGGUAUGGAAUUAUUUAUUGUUCUAGGAUUAUUGUUAUCGCAU
>random_seq_from_cds__NO_11639    RANDOM_LENGTH 94  SEQ_LENGTH    74
  GC_CONTENT    0.310810810810811  BASEPAIR    26  FREE_ENERGY
-16.00  LEN_BP_RATIO  2.84615384615385
UUCAUAAAACCCAGUCUGGGAUUCCAUAUAAUAUUUUUAUUUCUCUCCAUAUAAAUGUUAUUUGAA
AAGGUGGAUCUCCUGGUCUUUGUUUCAA
>random_seq_from_cds__NO_11642    RANDOM_LENGTH 95  SEQ_LENGTH    83
  GC_CONTENT    0.349397590361446  BASEPAIR    28  FREE_ENERGY
-17.90  LEN_BP_RATIO  2.96428571428571
CUAGAUUAACAAUUGCCGAUCAGGUGAUAAAGCCGUAUUUGAAGCAUUCACACUUUCCAUGGU
UCUAUUAUCUAAAUGGUAUAUGAUUGUCC
>random_seq_from_cds__NO_11648    RANDOM_LENGTH 82  SEQ_LENGTH    71
  GC_CONTENT    0.47887323943662  BASEPAIR    22  FREE_ENERGY
-17.60  LEN_BP_RATIO  3.22727272727273
GACGAGGAAUGCCUCCCGACACUGCUGGUA AAAAUUCUUGAAAAGAAAGGCCCAAUGUAAGAAGGG
UUAUCCUGGUUGUCCAG
>random_seq_from_cds__NO_11659    RANDOM_LENGTH 81  SEQ_LENGTH    60
  GC_CONTENT    0.4  BASEPAIR    21  FREE_ENERGY    -16.00  LEN_BP_RATIO
2.85714285714286
UUUUUAUCUCUUUUAUUCUCUUAAGAAGGUGUUUCUUUGCCAACAGGAGCUGAAACUACUCUAUUC
UGAGCUUGAAUCUUUU
>random_seq_from_cds__NO_11667    RANDOM_LENGTH 84  SEQ_LENGTH    63
  GC_CONTENT    0.5555555555555556  BASEPAIR    23  FREE_ENERGY
-26.81  LEN_BP_RATIO  2.73913043478261
```

GGUUUACUCAUGAUGGCGGCCUUCUCCGGAGAUGGGUGUAAUGCCUGAGAUUGCACAAGCUGUGG  
AAGAGAUGGAUUGGCUGCC

>random\_seq\_from\_cds\_\_NO\_11679      RANDOM\_LENGTH 88    SEQ\_LENGTH      62  
GC\_CONTENT      0.483870967741936      BASEPAIR      22    FREE\_ENERGY  
-18.70    LEN\_BP\_RATIO    2.81818181818182

UAAGAAAUACAUGAUAAUCCUAAAUAAGGGGAGCUUCUGAUAAUUGGAGGUGUUGCAGCCCCG  
GAUCAGCUCUCUGUUUUGGAAAA

>random\_seq\_from\_cds\_\_NO\_11681      RANDOM\_LENGTH 84    SEQ\_LENGTH      57  
GC\_CONTENT      0.403508771929825      BASEPAIR      20    FREE\_ENERGY  
-17.20    LEN\_BP\_RATIO    2.85

AUCUCAAGUUAGAUUCCUGGUCCUGGAUGAAGCUGGAUGGGCUUCUUUCUCAAGGUUAUUCUGAU  
UUUAUAAAUAGGAUGCACA

>random\_seq\_from\_cds\_\_NO\_11697      RANDOM\_LENGTH 110    SEQ\_LENGTH      96  
GC\_CONTENT      0.604166666666667      BASEPAIR      33    FREE\_ENERGY  
-40.50    LEN\_BP\_RATIO    2.90909090909091

CAAGCGUGAGGCCUGUAGCGGGGUCAGGGAAGCCAUUGCAUCGGACCACAGAGGCGUAGAACUU  
CGCUGAUGC UUUGGGAUCCUUGGCAGAGAAGGGUCACUGUAGUU

>random\_seq\_from\_cds\_\_NO\_11702      RANDOM\_LENGTH 99    SEQ\_LENGTH      79  
GC\_CONTENT      0.481012658227848      BASEPAIR      29    FREE\_ENERGY  
-27.00    LEN\_BP\_RATIO    2.72413793103448

AUAGUUGAGGUUGUAGGCGAGGACAGUGGUGUAGUGAUUGAACCCAAAAAAGUCAUAGGUGCCGU  
UGAUCCUCCUCUUCUCACUCUCUGUAAAUUCUGG

>random\_seq\_from\_cds\_\_NO\_11713      RANDOM\_LENGTH 90    SEQ\_LENGTH      75  
GC\_CONTENT      0.573333333333333      BASEPAIR      23    FREE\_ENERGY  
-24.57    LEN\_BP\_RATIO    3.26086956521739

UCAGGAAACCGUCCGUACAGAAACUCAUCCUCCUGGCCAGUGGCAUGCCGUUGUUGGUAUGAC  
CUCUGUGUAGUACCUGGCGGAGGCU

>random\_seq\_from\_cds\_\_NO\_11716      RANDOM\_LENGTH 88    SEQ\_LENGTH      66  
GC\_CONTENT      0.46969696969697      BASEPAIR      21    FREE\_ENERGY  
-23.30    LEN\_BP\_RATIO    3.14285714285714

GGUUUUGUGGUAAAUAUCCUAUCAGUAUCCUCCGUGUUCGGAUUGGUCAGCCCCACUCCGUUUU  
CGGUGAUGUAAAUGGGGAUGUCA

>random\_seq\_from\_cds\_\_NO\_11721      RANDOM\_LENGTH 84    SEQ\_LENGTH      71  
GC\_CONTENT      0.619718309859155      BASEPAIR      26    FREE\_ENERGY  
-29.00    LEN\_BP\_RATIO    2.73076923076923

CAUUCGGUCAGCGGCUUCCACAUCUCUGGGGACCCUGGUGACUUGGGCUCUGCCCAGUGUGUAC  
UGAGGCUCAGCGAGAUGAC

>random\_seq\_from\_cds\_\_NO\_11731      RANDOM\_LENGTH 80    SEQ\_LENGTH      60  
GC\_CONTENT      0.5    BASEPAIR      22    FREE\_ENERGY      -20.10    LEN\_BP\_RATIO  
2.72727272727273

AAAGUGAAGGCUCUGACUUUGGAGGGGAGUUUACUGUAUJAGGUGGUAGCAGUCUUUUUGCCCC  
CUUGGUGAGGAAACC

>random\_seq\_from\_cds\_\_NO\_11732      RANDOM\_LENGTH 78    SEQ\_LENGTH      58  
GC\_CONTENT      0.448275862068966      BASEPAIR      22    FREE\_ENERGY

---

-17.50 LEN\_BP\_RATIO 2.63636363636364  
GUUCUUUUCUAUGAUGCUAGUGAAAAAGUAGGCAGAUUCCUGGGAGUCCUUGACUUGCUGCUGU  
CGCUGAAGUUGAC

>random\_seq\_from\_cds\_\_NO\_11742      RANDOM\_LENGTH 71    SEQ\_LENGTH      63  
GC\_CONTENT      0.650793650793651      BASEPAIR    22    FREE\_ENERGY  
-25.80 LEN\_BP\_RATIO 2.86363636363636

GGACCAAGUGAGCCACCCUAAAAGAGGCCACUCCUGGGUCAGAGAUGCCGGGAGGGUGCUGGCC  
GGUGCC

>random\_seq\_from\_cds\_\_NO\_11744      RANDOM\_LENGTH 74    SEQ\_LENGTH      56  
GC\_CONTENT      0.642857142857143      BASEPAIR    20    FREE\_ENERGY  
-24.50 LEN\_BP\_RATIO 2.8

CGCUCUCAUUCUGCCAUCCACCAUGAUCCUGCAGGGCCUGAGGCAGGUCCAGUGGAACAGCGUG  
GCCAUGGGC

>random\_seq\_from\_cds\_\_NO\_11757      RANDOM\_LENGTH 97    SEQ\_LENGTH      84  
GC\_CONTENT      0.571428571428571      BASEPAIR    34    FREE\_ENERGY  
-29.10 LEN\_BP\_RATIO 2.47058823529412

UGGUGCAGGAUGACCAUGGGCUGAAGCCGUGCAGUCUUGAGGGCCUUGAGGAGUCGCCGGUAGCA  
CUGCACUGUUUUCUGUCUGGAUUCUGGGUGC

>random\_seq\_from\_cds\_\_NO\_11758      RANDOM\_LENGTH 89    SEQ\_LENGTH      81  
GC\_CONTENT      0.555555555555556      BASEPAIR    27    FREE\_ENERGY  
-31.90 LEN\_BP\_RATIO 3

UUCCUGCUGGGAGGAGCUGUGCCCAUGACAGAAUACCUUAUAAUGGGUGAUCUGACUGGCAUGG  
AGACUGCUGAAGUAUUCUGGCAGG

>random\_seq\_from\_cds\_\_NO\_11767      RANDOM\_LENGTH 71    SEQ\_LENGTH      54  
GC\_CONTENT      0.351851851851852      BASEPAIR    21    FREE\_ENERGY  
-16.90 LEN\_BP\_RATIO 2.57142857142857

UGUUGUAGUCUGCAUUUUGGAUGCAUACUUAUUUGUUGGCUUACAAAAAGGAAGUAUUAUCC  
AGUGUG

>random\_seq\_from\_cds\_\_NO\_11773      RANDOM\_LENGTH 92    SEQ\_LENGTH      80  
GC\_CONTENT      0.625    BASEPAIR    27    FREE\_ENERGY    -37.00  
LEN\_BP\_RATIO 2.96296296296296

GCGGGAACAGGGGUCUCUGCUGGGGAAGCUGGUCCAGAAUGGAACAGAACCUUCAUCCUGCCAU  
UCUUGGACCCCAUGCCCGCCCCUGG

>random\_seq\_from\_cds\_\_NO\_11774      RANDOM\_LENGTH 85    SEQ\_LENGTH      68  
GC\_CONTENT      0.588235294117647      BASEPAIR    27    FREE\_ENERGY  
-33.70 LEN\_BP\_RATIO 2.51851851851852

UACCAGAGGUCUCCAUAAGGACUCCACGGGUUAUUAACAGGGGUGCCCCUCGGAUCCUUGC  
UUUGGACUGUGGCCUCAAGU

>random\_seq\_from\_cds\_\_NO\_11775      RANDOM\_LENGTH 82    SEQ\_LENGTH      67  
GC\_CONTENT      0.626865671641791      BASEPAIR    22    FREE\_ENERGY  
-24.90 LEN\_BP\_RATIO 3.04545454545455

AUAAUCAGAUCCGAUGCCUCUGCCAGCGUGGGGUGAGGUCACUGUGGUACCCUGGGACCAUGCA  
CUAGACAGCCAAGGAGU

>random\_seq\_from\_cds\_\_NO\_11783      RANDOM\_LENGTH 71    SEQ\_LENGTH      60

---

```
GC_CONTENT    0.5833333333333333    BASEPAIR    19    FREE_ENERGY
-19.80    LEN_BP_RATIO    3.15789473684211
AGACGUUGCUGAUAACCCCAAUAUUGCCACAGUGCAGACCUCAGGGGCGUGCCGACAAGGUC
UAUUUU
>random_seq_from_cds__NO_11796    RANDOM_LENGTH    87    SEQ_LENGTH    76
GC_CONTENT    0.578947368421053    BASEPAIR    24    FREE_ENERGY
-17.00    LEN_BP_RATIO    3.166666666666667
UGGACCGCCUGUAUGAGCUCACACGCAUCGACCGCUGGUUCCUGCACCGAAUGAAGCGUAUCAUC
GCACAUGCCCAGCUGCUAGAAC
>random_seq_from_cds__NO_11806    RANDOM_LENGTH    84    SEQ_LENGTH    68
GC_CONTENT    0.632352941176471    BASEPAIR    21    FREE_ENERGY
-27.12    LEN_BP_RATIO    3.23809523809524
CCCUCCUAUGUGCUGAGCGGUGCUGCUAUGAAUGUGGCCUACACGGAUGGAGACCUGGAGCGCUU
CCUGAGCAGCGCAGCAGCC
>random_seq_from_cds__NO_11811    RANDOM_LENGTH    85    SEQ_LENGTH    68
GC_CONTENT    0.573529411764706    BASEPAIR    28    FREE_ENERGY
-28.70    LEN_BP_RATIO    2.42857142857143
GGGUGUGGACCUAGUAGCCUUGGCCACGCGGGUCAUCAUGGGGGAAGAAGUGGAACCUUGGGGGC
UAAUGACUGGUUCUGGAGUC
>random_seq_from_cds__NO_11813    RANDOM_LENGTH    81    SEQ_LENGTH    62
GC_CONTENT    0.564516129032258    BASEPAIR    24    FREE_ENERGY
-29.60    LEN_BP_RATIO    2.5833333333333333
GAGGUGGCCGGCUUUGGGGAGAGCCGCUGUGAGGCAUACCCUAAGGCCAUGCUAAGCACUGGCCU
UAAGAUCSCCAAGAAG
>random_seq_from_cds__NO_11820    RANDOM_LENGTH    90    SEQ_LENGTH    70
GC_CONTENT    0.7    BASEPAIR    25    FREE_ENERGY    -30.82    LEN_BP_RATIO
2.8
GCCUCUGGCGGGGUAUCACCAUGGUGUGGCAUGCCUAAUACCCGGCCCCCAUCAUUGACGC
CCCUGCUCUGGCCUGGCCAGAAAG
>random_seq_from_cds__NO_11829    RANDOM_LENGTH    72    SEQ_LENGTH    64
GC_CONTENT    0.609375    BASEPAIR    21    FREE_ENERGY    -22.70
LEN_BP_RATIO    3.04761904761905
CCUAUGUGGAGGGUGGAUCUGGAGCAUGAGUGGACAAUCCAGCCACAUGCCCUUCUCCAAGGC
CCACUGG
>random_seq_from_cds__NO_11834    RANDOM_LENGTH    84    SEQ_LENGTH    74
GC_CONTENT    0.621621621621622    BASEPAIR    21    FREE_ENERGY
-21.33    LEN_BP_RATIO    3.52380952380952
AGGUAGCCGAGCCAGGAGCUGAUGGGAACCCUGAUGGCACCCUGCUACCCUCCACCACAGUACC
GAGACAGGCAUCUCCCCAG
>random_seq_from_cds__NO_11835    RANDOM_LENGTH    84    SEQ_LENGTH    69
GC_CONTENT    0.623188405797101    BASEPAIR    19    FREE_ENERGY
-19.22    LEN_BP_RATIO    3.63157894736842
AACCUGGGGACCCUGGCUUGCUGCACCCCCAGACCUCACCCUGCUGCACUCAUUAUGGGGCA
ACAUAUCCUGUCCGUCCAG
```

---

>random\_seq\_from\_cds\_\_NO\_11838      RANDOM\_LENGTH 72    SEQ\_LENGTH      63  
GC\_CONTENT      0.619047619047619      BASEPAIR      22    FREE\_ENERGY  
-23.30    LEN\_BP\_RATIO    2.86363636363636  
UGUGCUCAGCUUCUCGGAAGCCACAUCGUCCGUCCAGAAGGGCGAAUCCCUGGCUGACUCCGUGC  
AGACCAU

>random\_seq\_from\_cds\_\_NO\_11839      RANDOM\_LENGTH 74    SEQ\_LENGTH      60  
GC\_CONTENT      0.7166666666666667      BASEPAIR      21    FREE\_ENERGY  
-28.60    LEN\_BP\_RATIO    2.85714285714286  
GAGCUGCUAUGCCGACGUCGUCGUCGUCCGGCACCCCCAGCCUGGAGCAGUGGAGGCUGGCCGCC  
AAGCACUGC

>random\_seq\_from\_cds\_\_NO\_11847      RANDOM\_LENGTH 84    SEQ\_LENGTH      70  
GC\_CONTENT      0.6    BASEPAIR      22    FREE\_ENERGY      -31.84    LEN\_BP\_RATIO  
3.18181818181818  
GGAAGCAGGAGGAGAAGCACCUGAAGAUGCUGCGGGACAUGACCGGCCUCCCGCACAAACCGAAAG  
UGCUCGACUGCGACCAGC

>random\_seq\_from\_cds\_\_NO\_11889      RANDOM\_LENGTH 78    SEQ\_LENGTH      65  
GC\_CONTENT      0.538461538461538      BASEPAIR      23    FREE\_ENERGY  
-20.40    LEN\_BP\_RATIO    2.82608695652174  
GUCACCGAGGACGAGGUCGAGUGGAUGAGACAAGGCUGGACUACUUACUACUGAUCCACGUGUGA  
GGGAACGGAAGAA

>random\_seq\_from\_cds\_\_NO\_11890      RANDOM\_LENGTH 83    SEQ\_LENGTH      66  
GC\_CONTENT      0.575757575757576      BASEPAIR      24    FREE\_ENERGY  
-29.70    LEN\_BP\_RATIO    2.75  
GCCAGGCCAAGAGGGAGCCCGCAGAAAGUUUACGUGGAAGAAACGCUAAGUUAGACUGUGGCCGU  
CAGCAUGGCCUCCGUCUC

>random\_seq\_from\_cds\_\_NO\_11897      RANDOM\_LENGTH 86    SEQ\_LENGTH      77  
GC\_CONTENT      0.662337662337662      BASEPAIR      29    FREE\_ENERGY  
-33.90    LEN\_BP\_RATIO    2.6551724137931  
GCAGCUUCUCCAGCACAGUGGGUGCUUCAGCAGCUGCAUGAUGAGUGAGGUGCUGGCCUGGCC  
GUGGUGGCAUAGGCCGCAAAG

>random\_seq\_from\_cds\_\_NO\_11902      RANDOM\_LENGTH 71    SEQ\_LENGTH      55  
GC\_CONTENT      0.690909090909091      BASEPAIR      23    FREE\_ENERGY  
-28.90    LEN\_BP\_RATIO    2.39130434782609  
GGCCUCGGGUGGCUGCUCCAGGCGCGCAGUGUGUCCUGGAUCACCAGCUGGAUCUUGGGCAGGU  
AACUCU

>random\_seq\_from\_cds\_\_NO\_11906      RANDOM\_LENGTH 89    SEQ\_LENGTH      76  
GC\_CONTENT      0.684210526315789      BASEPAIR      28    FREE\_ENERGY  
-38.60    LEN\_BP\_RATIO    2.71428571428571  
UGGCCGUCUCUCCGAUGAGCGGGAAGCCCAUGGAUCCCUUGGGGAUGGGCAGCUUGCAGCUCUU  
GUCGCGAGUGGCGGCCAGCGCAG

>random\_seq\_from\_cds\_\_NO\_11911      RANDOM\_LENGTH 85    SEQ\_LENGTH      66  
GC\_CONTENT      0.454545454545455      BASEPAIR      23    FREE\_ENERGY  
-20.10    LEN\_BP\_RATIO    2.8695652173913  
AUGAUAGCCAGAUUUUCUUCUGCAUGGCGGUUACAGGGCAAUCUUUAUGAGCCAGAAGAAGCUGUU



```
UCAGCUGUGCCACUUCAUUU
>random_seq_from_cds__NO_11914    RANDOM_LENGTH 72 SEQ_LENGTH    50
  GC_CONTENT    0.58    BASEPAIR    19 FREE_ENERGY    -19.40
  LEN_BP_RATIO  2.63157894736842
GUUAGCUGCUCUUCUCCGACGACCACUUGUACUUUGGGUCUGUGGAGUUGUGUGAGCUGGAGAAG
CCCGGAG
>random_seq_from_cds__NO_11915    RANDOM_LENGTH 97 SEQ_LENGTH    86
  GC_CONTENT    0.523255813953488    BASEPAIR    31 FREE_ENERGY
  -30.00 LEN_BP_RATIO  2.7741935483871
UUUCUGUAGUGGAUGUGGCUGGCUGUUGUAAUGACUGCGGUCGAGAUUCCUCUGACUGAGUCCUA
ACCAAUCCGCUACCAUGACCUUUGACAGUAUC
>random_seq_from_cds__NO_11916    RANDOM_LENGTH 71 SEQ_LENGTH    54
  GC_CONTENT    0.407407407407407    BASEPAIR    19 FREE_ENERGY
  -17.60 LEN_BP_RATIO  2.84210526315789
ACCAUUGGUAACUGGAGGAUGUUGCUGGGUCAAGCAGCUUUUAAUCUCCAUUUUUGCUUCUGAC
UGUACU
>random_seq_from_cds__NO_11917    RANDOM_LENGTH 68 SEQ_LENGTH    63
  GC_CONTENT    0.603174603174603    BASEPAIR    20 FREE_ENERGY
  -18.20 LEN_BP_RATIO  3.15
GGUUGGGGAGAGGAAGGACCUGGGAUUCCUGGAACACUAGGCACCAUGGUGACUGGUCGAACGAG
CUG
>random_seq_from_cds__NO_11924    RANDOM_LENGTH 82 SEQ_LENGTH    71
  GC_CONTENT    0.47887323943662 BASEPAIR    26 FREE_ENERGY
  -26.50 LEN_BP_RATIO  2.73076923076923
AAUCUUGUUGGUUGGGUCUGAUCCAGCCACAAUGACACUGUCAUUACGUGCUGGACCAAUU
UCAGUGUCAUCUCAUGU
>random_seq_from_cds__NO_11937    RANDOM_LENGTH 69 SEQ_LENGTH    52
  GC_CONTENT    0.538461538461538    BASEPAIR    19 FREE_ENERGY
  -16.00 LEN_BP_RATIO  2.73684210526316
AAGCACAGAAACUUGGUAUUGGGAUCAACAUAUUGUGGCCACACCAGGCCGUCUGCUGGACCAU
AUGC
>random_seq_from_cds__NO_11940    RANDOM_LENGTH 110 SEQ_LENGTH    87
  GC_CONTENT    0.448275862068966    BASEPAIR    31 FREE_ENERGY
  -28.30 LEN_BP_RATIO  2.80645161290323
UUGAAGACCUGGCAAGGAUUUCUCUGAAAAAGGAGCCAUUGUAUGUUGGCGUUGAUGAUGAUA
GCGAAUGCAACAGUGGAUGGUCUUGAACAGGGGAUAUGUUGUUUG
>random_seq_from_cds__NO_11950    RANDOM_LENGTH 90 SEQ_LENGTH    75
  GC_CONTENT    0.48    BASEPAIR    27 FREE_ENERGY    -27.50
  LEN_BP_RATIO  2.77777777777778
AUCAUUCAGGCCUGAAGUGAGGGAGCCUUUAUAUUGCCACAGUGUUCAUUGUUCAGCAUUGU
UGGGCUCACCUGGAAUCCAGAACCC
>random_seq_from_cds__NO_11956    RANDOM_LENGTH 99 SEQ_LENGTH    69
  GC_CONTENT    0.536231884057971    BASEPAIR    23 FREE_ENERGY
  -22.10 LEN_BP_RATIO  3
```

CCCAACUUCUUGUUAAGAUCUGGAUCUGUGCGUUGGCCUUCUCCACACUGGUUUUUAACUUCAGG  
AACUGAGAACGCACAUAACCCAGGCUCUCAUUA  
>random\_seq\_from\_cds\_\_NO\_11964      RANDOM\_LENGTH 87    SEQ\_LENGTH      54  
GC\_CONTENT      0.407407407407407      BASEPAIR    20    FREE\_ENERGY  
-16.70    LEN\_BP\_RATIO    2.7  
GAAAAGCUAUCCUCACAUCAUUCAGGACAAAUGUACCCUUCACUUUUUGACCCCAGGGGUGAAUA  
AUUCUGGGUCAUAUAUUUGUAG  
>random\_seq\_from\_cds\_\_NO\_11983      RANDOM\_LENGTH 89    SEQ\_LENGTH      80  
GC\_CONTENT      0.5625    BASEPAIR    25    FREE\_ENERGY    -15.90  
LEN\_BP\_RATIO    3.2  
CGGACCUCUUCACCACGCUGGUGGACCUCAAGUGGCGCUGGAACCUCUUCAUCUUCUUCUUCACC  
UACACCGUGGCCUGGCUUUUAUG  
>random\_seq\_from\_cds\_\_NO\_11997      RANDOM\_LENGTH 89    SEQ\_LENGTH      74  
GC\_CONTENT      0.513513513513513      BASEPAIR    25    FREE\_ENERGY  
-23.90    LEN\_BP\_RATIO    2.96  
CCACCAAGAUGUUAUCUGAUCCCAUGAGCCAGUCUGUGGCUGAUUUGCCACCAAAGCUUCAAAG  
AUGGCUGGAGGAGCAGCUAGGAUG  
>random\_seq\_from\_cds\_\_NO\_12001      RANDOM\_LENGTH 101    SEQ\_LENGTH      82  
GC\_CONTENT      0.463414634146341      BASEPAIR    25    FREE\_ENERGY  
-23.44    LEN\_BP\_RATIO    3.28  
GUUACAAGCUCGCUCUUCUUAUUGCUGACUCGUCCUCUCCUUCUCCACCUUUCUGAGGUGA  
AGCACAAUAAGGUUAGAGAUUCGGCAGUACUCAGAG  
>random\_seq\_from\_cds\_\_NO\_12009      RANDOM\_LENGTH 95    SEQ\_LENGTH      80  
GC\_CONTENT      0.4    BASEPAIR    29    FREE\_ENERGY    -21.40    LEN\_BP\_RATIO  
2.75862068965517  
UCGGGACAUGAUGGGAGCUGACAAAUUUUAUUCUGUUUCAUGAUUUUGAUCUGUCAUAGUGUC  
CACUGAUUGGGUUUGCUGCUGCCAAAUGG  
>random\_seq\_from\_cds\_\_NO\_12018      RANDOM\_LENGTH 88    SEQ\_LENGTH      70  
GC\_CONTENT      0.528571428571429      BASEPAIR    21    FREE\_ENERGY  
-22.15    LEN\_BP\_RATIO    3.3333333333333333  
UCGAAUGCCUUCUGUCUCAUAUCCAUCAACACCACUGACACGGGAAUUAGUUUCUGCACGUGCUC  
CCUGGUGUGCUAAGCUUGGAGAC  
>random\_seq\_from\_cds\_\_NO\_12027      RANDOM\_LENGTH 95    SEQ\_LENGTH      76  
GC\_CONTENT      0.763157894736842      BASEPAIR    29    FREE\_ENERGY  
-40.00    LEN\_BP\_RATIO    2.62068965517241  
UUCUGGCACUUCUCGGCCACCUCGUCGCGGACCUCAGGUGCUGGCUGCCGGCGCCCGGCUCCGC  
UGCCGCCGCGAGGUCCAUUUCAGCAUAUGG  
>random\_seq\_from\_cds\_\_NO\_12047      RANDOM\_LENGTH 84    SEQ\_LENGTH      55  
GC\_CONTENT      0.509090909090909      BASEPAIR    19    FREE\_ENERGY  
-19.80    LEN\_BP\_RATIO    2.89473684210526  
UAUCAUUCCAACAUCAUGGACUGGUCCUGCAGAUACAUAUCCUCCUGGUCACAAUAGG  
ACAGUCCAUGGGUGAUUU  
>random\_seq\_from\_cds\_\_NO\_12061      RANDOM\_LENGTH 84    SEQ\_LENGTH      79  
GC\_CONTENT      0.556962025316456      BASEPAIR    27    FREE\_ENERGY

---

-26.20 LEN\_BP\_RATIO 2.92592592592593  
GGUGGCGAGGGGCUUCCCAUCUCCUGUGGUACUGUCUGGAUAAUGAAUCCCCGCUUCAGGAAAGU  
GCUUGAAGCCCUAGUUUCU  
>random\_seq\_from\_cds\_\_NO\_12073 RANDOM\_LENGTH 70 SEQ\_LENGTH 61  
GC\_CONTENT 0.672131147540984 BASEPAIR 22 FREE\_ENERGY  
-25.60 LEN\_BP\_RATIO 2.77272727272727  
ACGUGGCGCGUCAGCUGCACAUCCUGCAGUCUGAGCCUGUGGUGACCGAUGCGUUCUGGCC  
GUGGC  
>random\_seq\_from\_cds\_\_NO\_12075 RANDOM\_LENGTH 85 SEQ\_LENGTH 73  
GC\_CONTENT 0.712328767123288 BASEPAIR 28 FREE\_ENERGY  
-36.60 LEN\_BP\_RATIO 2.60714285714286  
CAGGCCAGCCUGCCAUGGUCCACGCCUCGUGGACUGCCUGGGGAGUUCGUGCGCAAGACCCU  
GGCAACCUGGCUGCGGAGAC  
>random\_seq\_from\_cds\_\_NO\_12096 RANDOM\_LENGTH 87 SEQ\_LENGTH 71  
GC\_CONTENT 0.647887323943662 BASEPAIR 25 FREE\_ENERGY  
-32.60 LEN\_BP\_RATIO 2.84  
CUUCCUGCUGGUGUGGCUGGUGUCUUCUGUUGCAGGAUUAUGGCCUGGCCGCCGCGGCCUCG  
UCCCCACCUUCCACAUGGCCUC  
>random\_seq\_from\_cds\_\_NO\_12112 RANDOM\_LENGTH 84 SEQ\_LENGTH 67  
GC\_CONTENT 0.462686567164179 BASEPAIR 26 FREE\_ENERGY  
-22.90 LEN\_BP\_RATIO 2.57692307692308  
ACGUCCUCUCUACAAGGAAUAUUGUCCUCUCUGGAGGUUCAACCAUGUUCAGGGACUUUGGACGU  
CGCUUGCAAAGAGAUUUGA  
>random\_seq\_from\_cds\_\_NO\_12137 RANDOM\_LENGTH 92 SEQ\_LENGTH 80  
GC\_CONTENT 0.35 BASEPAIR 29 FREE\_ENERGY -19.00  
LEN\_BP\_RATIO 2.75862068965517  
CUUAGUGCAGAGAAGAAAGCUGGGGCGUGGUCAAGGUUUGCAAUAGGUUAUUAUUUUAACCAUA  
CUGAUCACUUUAUCCAUCUUCUUU  
>random\_seq\_from\_cds\_\_NO\_12146 RANDOM\_LENGTH 92 SEQ\_LENGTH 88  
GC\_CONTENT 0.840909090909091 BASEPAIR 35 FREE\_ENERGY  
-52.90 LEN\_BP\_RATIO 2.51428571428571  
CGGAGCCGCCUUGGCCGGCCCGGGCCGGGCGUGCGCGCCGCCGCUUCAGCCGCAGCUUCAGCU  
CGGACUCGGGCUCCAGCCCGGCGUCCG  
>random\_seq\_from\_cds\_\_NO\_12181 RANDOM\_LENGTH 81 SEQ\_LENGTH 74  
GC\_CONTENT 0.486486486486487 BASEPAIR 30 FREE\_ENERGY  
-26.80 LEN\_BP\_RATIO 2.46666666666667  
CUGCUUCCACUCAUCCUUCACAUGGAGAGUCUUGGAAGCCAUUUCUAAUAGAUGUUGAUGGUG  
GAGGUGGGGAGGUGC  
>random\_seq\_from\_cds\_\_NO\_12184 RANDOM\_LENGTH 82 SEQ\_LENGTH 74  
GC\_CONTENT 0.648648648648649 BASEPAIR 22 FREE\_ENERGY  
-23.70 LEN\_BP\_RATIO 3.36363636363636  
CGGGGAGGAAGAGACCUGAACGUCCUGGCGAAGGUAACGGGGCGUGGACGAACUGAGGGACA  
GAUCCGCGUGGGAGU  
>random\_seq\_from\_cds\_\_NO\_12186 RANDOM\_LENGTH 81 SEQ\_LENGTH 67

---

```
GC_CONTENT    0.641791044776119    BASEPAIR    23    FREE_ENERGY
-31.70    LEN_BP_RATIO    2.91304347826087
GGAAGGCACUGGAGGCUUGUUGUUCUGAGGAGGAGGAGGGGGAACCGCUUCCCUGUGGAUGGAGG
GCCUGUUGCCCACUGG
>random_seq_from_cds__NO_12189    RANDOM_LENGTH    110    SEQ_LENGTH
102    GC_CONTENT    0.607843137254902    BASEPAIR    36    FREE_ENERGY
-42.40    LEN_BP_RATIO    2.833333333333333
GGCUGCCUGGGGCCUCCGGGCACUGGUGGGGACCCCCGGUUGUGCGGACUUGAUUGAAUGGGUCU
UGGAGUACUAGGUACUGGAGGAGGAAUGCUAUCAGGCUUUGAGCC
>random_seq_from_cds__NO_12191    RANDOM_LENGTH    110    SEQ_LENGTH
103    GC_CONTENT    0.58252427184466    BASEPAIR    35    FREE_ENERGY
-38.80    LEN_BP_RATIO    2.94285714285714
CCUGGGCCACUUGGGGGUGAAAAGGGUUCGCGAUGUGGAUCUCCUCCCGGUGGCAACAAUGG
UGGUCGGCUUCCUCCAGAAUCCAUAUCCUGUUGGCCGUGGAUC
>random_seq_from_cds__NO_12196    RANDOM_LENGTH    87    SEQ_LENGTH    79
GC_CONTENT    0.683544303797468    BASEPAIR    29    FREE_ENERGY
-39.30    LEN_BP_RATIO    2.72413793103448
GCUGGGGGCGUCGCUCCACGUCUGGGGUUGGCUAAUGCUCGGCAGCUGCCUCCUGGCCAGAGCCC
AGGCUGGAUUCUGAUGGCACCA
>random_seq_from_cds__NO_12200    RANDOM_LENGTH    95    SEQ_LENGTH    83
GC_CONTENT    0.433734939759036    BASEPAIR    27    FREE_ENERGY
-18.50    LEN_BP_RATIO    3.07407407407407
ACAUGGGCCAAUUAUUCAGACUGCCUUCGCUUUCUGCAGCCAGAUUAUCAGCAUAGGAAAGGCAAG
AAUUCUUUGAACGCCUCUAUGUAAUGUAUA
>random_seq_from_cds__NO_12204    RANDOM_LENGTH    110    SEQ_LENGTH
103    GC_CONTENT    0.378640776699029    BASEPAIR    28    FREE_ENERGY
-19.51    LEN_BP_RATIO    3.67857142857143
GUUGUGAUGUUUAUUUACUUCUGGCUACAAUUAUUAUUGGAUCCUGGUGGAAGGUCUCUACCU
GCAUAAUCUCAUCUUUGUGGCUUUCUUUUCGGACACCAAUACCU
>random_seq_from_cds__NO_12208    RANDOM_LENGTH    73    SEQ_LENGTH    66
GC_CONTENT    0.575757575757576    BASEPAIR    23    FREE_ENERGY
-24.90    LEN_BP_RATIO    2.8695652173913
GUCCUGGUCCUAGUCUUUGGAGUGCAUUAUCAUCGUGUUCGUAUGCCUGCCUCACUCCUUCACUGG
GCUCGGGU
>random_seq_from_cds__NO_12227    RANDOM_LENGTH    68    SEQ_LENGTH    54
GC_CONTENT    0.592592592592593    BASEPAIR    20    FREE_ENERGY
-19.50    LEN_BP_RATIO    2.7
CAUGGUGGCCCGUGUCUCUGUGUCAUGGGAGUGCAGCAAGGAGGCACUCAAGCGCCAUUAUCA
GCU
>random_seq_from_cds__NO_12234    RANDOM_LENGTH    70    SEQ_LENGTH    63
GC_CONTENT    0.650793650793651    BASEPAIR    20    FREE_ENERGY
-28.60    LEN_BP_RATIO    3.15
CGCUGGGGCUCUUGUCUGUCUCUGUUGCCCAGGGGAAGGGAGCUUCUUGGAGUCGGCCUC
UGGCA
```

---

>random\_seq\_from\_cds\_\_NO\_12244      RANDOM\_LENGTH 82    SEQ\_LENGTH      62  
GC\_CONTENT      0.516129032258065      BASEPAIR      23    FREE\_ENERGY  
-26.30    LEN\_BP\_RATIO    2.69565217391304  
UCGAUAUAAGCGGAGAGUGUCAUGUAGAUUUUCUCUCGUAUAAGGGGUGACCCGGUUCAGCAGGAG  
AGAGUUGUGCAUGGAGC

>random\_seq\_from\_cds\_\_NO\_12265      RANDOM\_LENGTH 99    SEQ\_LENGTH      88  
GC\_CONTENT      0.659090909090909      BASEPAIR      31    FREE\_ENERGY  
-39.40    LEN\_BP\_RATIO    2.83870967741936  
CCUCCAGCUUGCUCUCAUAGUCCCAGCCGCGUCGUCUCCAGCAGGUAGGUGGCCUCCUCCCGCUC  
GCGGCGGUACUGGUCCUCCAGUUCUGGAGCCCU

>random\_seq\_from\_cds\_\_NO\_12297      RANDOM\_LENGTH 71    SEQ\_LENGTH      58  
GC\_CONTENT      0.637931034482759      BASEPAIR      21    FREE\_ENERGY  
-16.90    LEN\_BP\_RATIO    2.76190476190476  
GUCCCACGCCUGCGGCACAUCAUCACUGUUGAUGGAAAGCCACCGACCUGGUCCGAGUUCCCCAA  
GGGCAU

>random\_seq\_from\_cds\_\_NO\_12344      RANDOM\_LENGTH 78    SEQ\_LENGTH      73  
GC\_CONTENT      0.465753424657534      BASEPAIR      22    FREE\_ENERGY  
-15.70    LEN\_BP\_RATIO    3.31818181818182  
GAGGUCUJAGAGUAAAUGGUUAUUCUCUUUUAUGGUCAUCAGGCUCACUCUCAGGGUCAUCUUCG  
CUCUCUCUCUUA

>random\_seq\_from\_cds\_\_NO\_12347      RANDOM\_LENGTH 82    SEQ\_LENGTH      66  
GC\_CONTENT      0.439393939393939      BASEPAIR      25    FREE\_ENERGY  
-22.90    LEN\_BP\_RATIO    2.64  
AAACCCUGAUCAUCCUUAUCUUCUGAGGAGUGAUGUAUUUAUCCUCUUAUCUGUGGACACAUC  
AAGGGUUCUGGAUCCU

>random\_seq\_from\_cds\_\_NO\_12348      RANDOM\_LENGTH 98    SEQ\_LENGTH      86  
GC\_CONTENT      0.802325581395349      BASEPAIR      30    FREE\_ENERGY  
-46.60    LEN\_BP\_RATIO    2.86666666666667  
GAGCCUUCGUCCGCGCGGGGAGCCGCUUUGGUGGCACGCCGGGAGCUCGCCCAGACCCGGCCCCG  
GCCACGAGGGCCCCGAACCCGGUGGGGCAGUCC

>random\_seq\_from\_cds\_\_NO\_12351      RANDOM\_LENGTH 77    SEQ\_LENGTH      64  
GC\_CONTENT      0.609375    BASEPAIR      21    FREE\_ENERGY      -25.80  
LEN\_BP\_RATIO    3.04761904761905  
CAAAGGGUACGACGAUCUACCCCAUACGGGGGCAUGGAUGGAGUAGGCAUCCCUCCACGAUGU  
AUGGGGACCCGC

>random\_seq\_from\_cds\_\_NO\_12367      RANDOM\_LENGTH 83    SEQ\_LENGTH      49  
GC\_CONTENT      0.612244897959184      BASEPAIR      19    FREE\_ENERGY  
-23.09    LEN\_BP\_RATIO    2.57894736842105  
UAAUGGCCUGGAGCCAAUCGCCACUGAUACCACAGCAGAGAAUUCAGGGGAGCUUGGAUCCAAC  
AAGGCAGUGUUAGGUCCU

>random\_seq\_from\_cds\_\_NO\_12376      RANDOM\_LENGTH 110    SEQ\_LENGTH      58  
GC\_CONTENT      0.5    BASEPAIR      19    FREE\_ENERGY      -21.47    LEN\_BP\_RATIO  
3.05263157894737  
CUCUCUCUUGCCAGGCACUUUGAGACGCCACUGCAUACCUCACCAAUUCACCCAACUCCUAUA

```
ACUUUUUCAAUCUUA AUGCAGGAUGCGUCAUUUUCUUUGGCAAAC
>random_seq_from_cds__NO_12392    RANDOM_LENGTH 110 SEQ_LENGTH
    101 GC_CONTENT    0.495049504950495    BASEPAIR    34 FREE_ENERGY
    -24.60 LEN_BP_RATIO    2.97058823529412
GUAAAACCCCUUUUUGCUUAAUGGCCCUACAUCCCGGAUCUCGGUGUUCAGCUUCAUGAUUCUGU
CACCAAUGUCCACUUGGGUGAAGCUCUCAUCAGCAGCAAUGGUGU
>random_seq_from_cds__NO_12410    RANDOM_LENGTH 102 SEQ_LENGTH    91
    GC_CONTENT    0.428571428571429    BASEPAIR    30 FREE_ENERGY
    -26.16 LEN_BP_RATIO    3.033333333333333
UACUUCUCCAGCUUUCUCCCAUCUCUGAGUGAUGAGGAAUCACUUCUUCUUGGAAAAACUCCUU
ACACUUUUCGGAAAAUGUCAUGCUCUGGAGAAAAGA
>random_seq_from_cds__NO_12426    RANDOM_LENGTH 84 SEQ_LENGTH    62
    GC_CONTENT    0.532258064516129    BASEPAIR    22 FREE_ENERGY
    -22.70 LEN_BP_RATIO    2.81818181818182
CAAGAUCUCAAUA CAAGGCCGAGUCUGUGGAAUGUAUCAGGGUAUAAUUUCGUGGGUUUCGCU
GGUUACAGGCUAUGAUUU
>random_seq_from_cds__NO_12433    RANDOM_LENGTH 82 SEQ_LENGTH    55
    GC_CONTENT    0.545454545454545    BASEPAIR    20 FREE_ENERGY
    -15.50 LEN_BP_RATIO    2.75
CUCUGAUGAGGAAGAGA UCCAGCAUGUGGUAGAGGUGAUUCAA AAUCCACGGCCAAAGUCAUCG
UGGUUUUCUCCAGUGGC
>random_seq_from_cds__NO_12439    RANDOM_LENGTH 97 SEQ_LENGTH    76
    GC_CONTENT    0.565789473684211    BASEPAIR    22 FREE_ENERGY
    -16.32 LEN_BP_RATIO    3.45454545454545
ACUUAGCAGUCUACUCCA UUGCCCACGCCUUGCAAGAUUAUAUACCUGCUUACCUGGGAGAGGG
CUCUUCACCAAUGGCUCCUGUGCAGACA UCAA
>random_seq_from_cds__NO_12470    RANDOM_LENGTH 73 SEQ_LENGTH    66
    GC_CONTENT    0.545454545454545    BASEPAIR    21 FREE_ENERGY
    -22.90 LEN_BP_RATIO    3.14285714285714
GGGGAGUGGGAGCUCUUGGGCAUCAACAAGGCCACCCCAAAGAUGUCCAUGGGCAACAACCUAUA
UGACCAGA
>random_seq_from_cds__NO_12473    RANDOM_LENGTH 90 SEQ_LENGTH    70
    GC_CONTENT    0.585714285714286    BASEPAIR    23 FREE_ENERGY
    -20.50 LEN_BP_RATIO    3.04347826086957
CUUCCUGCUCAUGAUGAAUGACUUGCUCCUGCCAGUGGCACCCCCUCAUCAGGUGUCUACUUC
GCCUGUGCCUGUCCUGAUGGUGG
>random_seq_from_cds__NO_12478    RANDOM_LENGTH 85 SEQ_LENGTH    72
    GC_CONTENT    0.486111111111111    BASEPAIR    24 FREE_ENERGY
    -24.50 LEN_BP_RATIO    3
UCCUCUGGAACACCUAGAAUGGCUUCUGUUUGGCAGAGAUUGGGUUUUUAUGCCUCUCUUCUGAA
AAGACAGCUAAAUGGUGGGC
>random_seq_from_cds__NO_12482    RANDOM_LENGTH 85 SEQ_LENGTH    73
    GC_CONTENT    0.534246575342466    BASEPAIR    27 FREE_ENERGY
    -27.70 LEN_BP_RATIO    2.7037037037037
```

---

AUCCUUCUGGUAAGCUGCACAUGGGCCAUGUGCGUGUCUACACCAUCAGCGACACCAUAGCACGG  
UCCAGAAGAUGAGAGGGAU

>random\_seq\_from\_cds\_\_NO\_12486      RANDOM\_LENGTH 90    SEQ\_LENGTH      82  
GC\_CONTENT      0.548780487804878      BASEPAIR    25    FREE\_ENERGY  
-26.16    LEN\_BP\_RATIO    3.28

ACUGGGACCCAGUGGAUCAAACAGUGCUUGCCAAUGAGCAGGUGGAUGAACAUGGCUGUUAUGG  
CGUUCUGGAGCAAAGGUGGAACAGA

>random\_seq\_from\_cds\_\_NO\_12494      RANDOM\_LENGTH 73    SEQ\_LENGTH      66  
GC\_CONTENT      0.606060606060606      BASEPAIR    23    FREE\_ENERGY  
-18.20    LEN\_BP\_RATIO    2.8695652173913

CACACCAAUCCCCAUUGUCCACUGCCCAGUCUGUGGCCCCACACCUGUGCCCCUGGAGGACUUGC  
CUGUGACC

>random\_seq\_from\_cds\_\_NO\_12559      RANDOM\_LENGTH 84    SEQ\_LENGTH      73  
GC\_CONTENT      0.479452054794521      BASEPAIR    25    FREE\_ENERGY  
-16.70    LEN\_BP\_RATIO    2.92

GGGAUGUCCGUCCAUUGAUACAAACCAAAGAUGGAGAAAAUACGCUACAGUGGUUGGGUACAGU  
GCUUUCUUAUUGCGAGU

>random\_seq\_from\_cds\_\_NO\_12562      RANDOM\_LENGTH 110    SEQ\_LENGTH      92  
GC\_CONTENT      0.402173913043478      BASEPAIR    25    FREE\_ENERGY  
-16.75    LEN\_BP\_RATIO    3.68

AUAGGAAAAACUGCAGUCACAGCCAAUUGGAUUAUAGAAGAUAGCUACAAAACUUAAGUUAUCUC  
CUAAGAAUCCUCGUAUCCCCAAUUGCAUAUGCUUGAAUUAUUAU

>random\_seq\_from\_cds\_\_NO\_12567      RANDOM\_LENGTH 88    SEQ\_LENGTH      81  
GC\_CONTENT      0.45679012345679      BASEPAIR    27    FREE\_ENERGY  
-29.33    LEN\_BP\_RATIO    3

AACAAAGAAGAGCCUGGAAGGUGGGAGGAACUGACCAGAGUCCAAGGAAAGAAAACCACAGUUAU  
CUUACCUUUGGCUCCAUUUGUGA

>random\_seq\_from\_cds\_\_NO\_12585      RANDOM\_LENGTH 82    SEQ\_LENGTH      64  
GC\_CONTENT      0.5    BASEPAIR    20    FREE\_ENERGY    -20.20    LEN\_BP\_RATIO  
3.2

UAUUGGUGCCUACGUGGAUCUAAGGAGAAGGGAUCUGUUGAAAGCAAUGGAAGUUCUACAGCAA  
CUUUUCCCCUUCGGGCA

>random\_seq\_from\_cds\_\_NO\_12591      RANDOM\_LENGTH 90    SEQ\_LENGTH      68  
GC\_CONTENT      0.485294117647059      BASEPAIR    24    FREE\_ENERGY  
-27.30    LEN\_BP\_RATIO    2.83333333333333

AGAAGGUCAAGGUGUGGUGCUUCUCUGUGGCCACCGCCACAUUUUGGAGGAUUUAUCUUAUGCA  
UGGACCUUCAUGAUAACCCCUUAU

>random\_seq\_from\_cds\_\_NO\_12611      RANDOM\_LENGTH 85    SEQ\_LENGTH      75  
GC\_CONTENT      0.48    BASEPAIR    24    FREE\_ENERGY    -17.30  
LEN\_BP\_RATIO    3.125

UGAACUCGUCAUUAACGUGGGAGGUCAAUCCAGAAGAACUGCAGAAUGGGGAGGGAUUUGGAUUA  
AUCAUCAUGUCCGGCCAGU

>random\_seq\_from\_cds\_\_NO\_12619      RANDOM\_LENGTH 82    SEQ\_LENGTH      63  
GC\_CONTENT      0.428571428571429      BASEPAIR    22    FREE\_ENERGY

---

-20.20 LEN\_BP\_RATIO 2.86363636363636

CAUCAGCUGAGCUUCUGGUUCCAUAUUGAAGAAGACUACUAAUUGAAAUAAGAACAGUCAGUGAU  
GGUGGAGAUGGAAGCAG

>random\_seq\_from\_cds\_\_NO\_12620      RANDOM\_LENGTH 81    SEQ\_LENGTH      74  
GC\_CONTENT      0.378378378378378      BASEPAIR    26    FREE\_ENERGY  
-17.70 LEN\_BP\_RATIO 2.84615384615385

CAGUGAGAAAUAAGGAUUCAAAAAUGUCAAGGUUUGAGUUCAGAGGAAUUCAAUUCUAGAA  
CCUAGCACCCAUUUUC

>random\_seq\_from\_cds\_\_NO\_12627      RANDOM\_LENGTH 86    SEQ\_LENGTH      79  
GC\_CONTENT      0.518987341772152      BASEPAIR    26    FREE\_ENERGY  
-19.70 LEN\_BP\_RATIO 3.03846153846154

CUCGCGCUGCCGUGGACUUUUGGAGAAUGAGUUGAAACUGAUGGAAGAAUUGUCAAGCAAUAUA  
AGAGCGAGGCCUCGGCGUGG

>random\_seq\_from\_cds\_\_NO\_12630      RANDOM\_LENGTH 90    SEQ\_LENGTH      78  
GC\_CONTENT      0.615384615384615      BASEPAIR    25    FREE\_ENERGY  
-29.60 LEN\_BP\_RATIO 3.12

CCCACCUUCUUGUGUGUGCCAAGUGCUCGAGCCGUGGUGACCUCAUCUACUUCUGGAAGGA  
UGGUGCACCCUGGUGCGGCCCAU

>random\_seq\_from\_cds\_\_NO\_12649      RANDOM\_LENGTH 88    SEQ\_LENGTH      74  
GC\_CONTENT      0.513513513513513      BASEPAIR    26    FREE\_ENERGY  
-28.90 LEN\_BP\_RATIO 2.84615384615385

CUGAUGGCUCCCAGUACUAUGUUCUGCUCAUCAUCACUGAUGGGGUCAUCUCUGACAUGACGCAG  
ACCAAGGAGGCCAUCGUCAGCGG

>random\_seq\_from\_cds\_\_NO\_12650      RANDOM\_LENGTH 86    SEQ\_LENGTH      76  
GC\_CONTENT      0.486842105263158      BASEPAIR    26    FREE\_ENERGY  
-23.30 LEN\_BP\_RATIO 2.92307692307692

CCUCCUCAUUGCCCAUGUCUAUCAUAUCGUCGGUGUAGGACCAGCCAUGUUUGAGGGCAAUGGA  
AGAGUUGGACGGUGAUGAUGU

>random\_seq\_from\_cds\_\_NO\_12665      RANDOM\_LENGTH 88    SEQ\_LENGTH      75  
GC\_CONTENT      0.653333333333333      BASEPAIR    25    FREE\_ENERGY  
-30.10 LEN\_BP\_RATIO 3

CCGUUGCCUGCAGUCACCCUCUCGUGCUGUGGAUUGGCCUGUGCCCCAACAAAGGGCGGUGCCU  
UCAAGCAGACAGAUGACGGGCGC

>random\_seq\_from\_cds\_\_NO\_12671      RANDOM\_LENGTH 73    SEQ\_LENGTH      60  
GC\_CONTENT      0.666666666666667      BASEPAIR    20    FREE\_ENERGY  
-22.60 LEN\_BP\_RATIO 3

GAUCCUGGCAGAGAAGCGGGCAGCAGCACCUGUGGUGUCAGUGCCCUGCAUCCCACCACACAGGG  
CUUAGUAA

>random\_seq\_from\_cds\_\_NO\_12678      RANDOM\_LENGTH 82    SEQ\_LENGTH      67  
GC\_CONTENT      0.701492537313433      BASEPAIR    26    FREE\_ENERGY  
-31.70 LEN\_BP\_RATIO 2.57692307692308

ACACCAUCUUCUACCGGGCAGCAGUGCGGCUUCGUGAGCAGGGUGGUGCUGUGCUCCGCCAGGCC  
CGGCGCCAGGCAGAAAA

>random\_seq\_from\_cds\_\_NO\_12696      RANDOM\_LENGTH 110    SEQ\_LENGTH



---

104 GC\_CONTENT 0.644230769230769 BASEPAIR 37 FREE\_ENERGY  
-41.60 LEN\_BP\_RATIO 2.81081081081081  
GGGCUCUCGAGCACCAGCAAGGUGCAAGGCGAGCAGAGCAGUGAGACCAGCGAUAGUGAUUGA  
GAUGGACUGCCACUCUCCGCCCUACCUGAGUGCCGUGCGGGCCA  
>random\_seq\_from\_cds\_\_NO\_12699 RANDOM\_LENGTH 88 SEQ\_LENGTH 62  
GC\_CONTENT 0.419354838709677 BASEPAIR 24 FREE\_ENERGY  
-20.60 LEN\_BP\_RATIO 2.58333333333333  
UGUGAAACAGGGCUGAUGAGAUCGAGAAGAUUUUGUGCCACAAGUUCAUGCGCUUCAUGAUGAUG  
CGAGCAGAGAACUUCUUUAUCCU  
>random\_seq\_from\_cds\_\_NO\_12714 RANDOM\_LENGTH 87 SEQ\_LENGTH 73  
GC\_CONTENT 0.534246575342466 BASEPAIR 20 FREE\_ENERGY  
-18.12 LEN\_BP\_RATIO 3.65  
AGUACCGCAUGGUCUGGAGAUAUCCACAGCAACGUCAGAGGCUCUAAUGUCUUGCUGGACCA  
AAAUCUCACCCCAAACUUGCU  
>random\_seq\_from\_cds\_\_NO\_12731 RANDOM\_LENGTH 89 SEQ\_LENGTH 70  
GC\_CONTENT 0.557142857142857 BASEPAIR 22 FREE\_ENERGY  
-24.50 LEN\_BP\_RATIO 3.18181818181818  
AGCUGGAACAUCUGAAACUUGGUCUCCUGGACAUGCAGGUGUUUGUAGAGGCUGCUGCCCUCGCA  
CCACUGGGUCACAAUUGCCAGGU  
>random\_seq\_from\_cds\_\_NO\_12737 RANDOM\_LENGTH 88 SEQ\_LENGTH 72  
GC\_CONTENT 0.513888888888889 BASEPAIR 28 FREE\_ENERGY  
-30.80 LEN\_BP\_RATIO 2.57142857142857  
UGUGACUUCGAAUUGCAUCCCUCAAUCAUCCUGCUGUCCACAGGCAGGGUGGUGCUGACCAUGUG  
GACAUUAGGUGUGGAUGUCGACC  
>random\_seq\_from\_cds\_\_NO\_12747 RANDOM\_LENGTH 110 SEQ\_LENGTH  
101 GC\_CONTENT 0.544554455445545 BASEPAIR 29 FREE\_ENERGY  
-31.77 LEN\_BP\_RATIO 3.48275862068966  
CCUGUAUGUGCUCCAUCUACUCAUUUUCUACUGCGCAGCCUGGCAUUGGGGUUGGUGACUCU  
GAUGGCCAGUUGGGCAGCUCUUCCACGAUGGCUUUGCGGUUCU  
>random\_seq\_from\_cds\_\_NO\_12755 RANDOM\_LENGTH 88 SEQ\_LENGTH 74  
GC\_CONTENT 0.648648648648649 BASEPAIR 28 FREE\_ENERGY  
-30.00 LEN\_BP\_RATIO 2.64285714285714  
AGAUCAGCUGCCAGUUCAUGCUGUGCCCGAGCUGCCGCCAACUGCAUCGAGGCUGUAGUGGUG  
GCUGACAGCUGCCCACAGUGCGG  
>random\_seq\_from\_cds\_\_NO\_12762 RANDOM\_LENGTH 90 SEQ\_LENGTH 86  
GC\_CONTENT 0.651162790697674 BASEPAIR 29 FREE\_ENERGY  
-45.40 LEN\_BP\_RATIO 2.96551724137931  
CUGGAUGGGCUGCCCACUACAGCCCAGCCUGGACCCAGUCUCCUAUCCAGGAGGAGGGCAG  
AAGCUGGGGCAAGGGCAGAAGCUGG  
>random\_seq\_from\_cds\_\_NO\_12764 RANDOM\_LENGTH 84 SEQ\_LENGTH 65  
GC\_CONTENT 0.692307692307692 BASEPAIR 20 FREE\_ENERGY  
-29.00 LEN\_BP\_RATIO 3.25  
UGGGCAAGGCUGCUCUCGUCCAACUCAGGCCGUGCCUGGCUCUCCAGGGACCCAGUCAAGCCC  
AGCCCCACAACAUCUGU

---

```
>random_seq_from_cds__NO_12772    RANDOM_LENGTH 78 SEQ_LENGTH    66
  GC_CONTENT    0.6969696969697    BASEPAIR    24 FREE_ENERGY
  -35.30 LEN_BP_RATIO    2.75
CACCACGGAGAGUUUCAGAGGCAGAGAUGGCGGGCCGAGAGGCCUGUCACUGGGCACAGAGGC
CGAGCUGCCGAAC
>random_seq_from_cds__NO_12781    RANDOM_LENGTH 84 SEQ_LENGTH    72
  GC_CONTENT    0.625    BASEPAIR    25 FREE_ENERGY    -23.80
  LEN_BP_RATIO    2.88
AACCCGCUGAUCUGCGCGCGCGGCUACCACGCCAGCGAUGAUGGGACCAAGUGUGUGGGACGUGA
AUGAGUGUGAGACAGGUGU
>random_seq_from_cds__NO_12783    RANDOM_LENGTH 98 SEQ_LENGTH    79
  GC_CONTENT    0.658227848101266    BASEPAIR    27 FREE_ENERGY
  -36.50 LEN_BP_RATIO    2.92592592592593
UUUGGCCGGGGCUGCAUCGGACGUGAAUGAGUGCUGGGCCUCGCCAGGCCGCCUGUGCCAGCACA
CGUGUGAGAACACACUCGGCUCCUACCGCUGUU
>random_seq_from_cds__NO_12796    RANDOM_LENGTH 84 SEQ_LENGTH    71
  GC_CONTENT    0.450704225352113    BASEPAIR    25 FREE_ENERGY
  -16.80 LEN_BP_RATIO    2.84
ACCUUGACAUCUAUGAACAGCAAGUGAUGACUGCAGCCAAAAGGGAUGUACAGAUUAUAGUGUU
UCCAGAAGAUGGCAUUCAU
>random_seq_from_cds__NO_12817    RANDOM_LENGTH 80 SEQ_LENGTH    59
  GC_CONTENT    0.423728813559322    BASEPAIR    25 FREE_ENERGY
  -19.30 LEN_BP_RATIO    2.36
GAUGACCUGAACUGGUGAAUUUGGGUAAGUAGGAUAUGCCUGAACAUACUGAGUUUAUGGAUUC
AUCGUGGUUGUGGGC
>random_seq_from_cds__NO_12824    RANDOM_LENGTH 64 SEQ_LENGTH    59
  GC_CONTENT    0.576271186440678    BASEPAIR    19 FREE_ENERGY
  -21.11 LEN_BP_RATIO    3.10526315789474
CUUGCCAAUGCCCAGGUGGCUAAGGGUUUCCCAUAGUCUACUGUCCGAUGGCUUCUGCGAGC
>random_seq_from_cds__NO_12825    RANDOM_LENGTH 85 SEQ_LENGTH    69
  GC_CONTENT    0.449275362318841    BASEPAIR    22 FREE_ENERGY
  -18.30 LEN_BP_RATIO    3.13636363636364
UUGCUGGAUUUGCCCGAACUGAAGUCAUGCAGAAGAGUUUGUAGCUGCAAGUUCUUAUUUGGGGUU
GAAACCAAUGAGCAACUGAU
>random_seq_from_cds__NO_12837    RANDOM_LENGTH 82 SEQ_LENGTH    65
  GC_CONTENT    0.492307692307692    BASEPAIR    24 FREE_ENERGY
  -17.40 LEN_BP_RATIO    2.70833333333333
GGGAAGACAACAGCCUUCUGAAGUGGGAAGUUGGGUUGGCUUCAUGAGUUGGAAAGAGACUGGA
AUCUCCAUAUAUGGCA
>random_seq_from_cds__NO_12838    RANDOM_LENGTH 81 SEQ_LENGTH    61
  GC_CONTENT    0.639344262295082    BASEPAIR    22 FREE_ENERGY
  -21.56 LEN_BP_RATIO    2.77272727272727
ACAAUACCUUGGGGGGCCGUCGAUCCGAAGUGCCUAUAUUGCCGCUCUGUACUUCACGCUGAGC
AGCCUCACCAGCGUGG
```



```
CUGCCGGAAAACUUC
>random_seq_from_cds__NO_12955    RANDOM_LENGTH 81 SEQ_LENGTH    47
  GC_CONTENT    0.553191489361702  BASEPAIR    19 FREE_ENERGY
  -16.62 LEN_BP_RATIO    2.47368421052632
AUGAAUCACCUUUCGUUGGGCACAAACAGGAACGGUAUAUGACUGCUGCUGCUCCUAUGCAAGGGA
CCUACAUCCUCAGUA
>random_seq_from_cds__NO_12972    RANDOM_LENGTH 85 SEQ_LENGTH    56
  GC_CONTENT    0.5 BASEPAIR    22 FREE_ENERGY    -23.40 LEN_BP_RATIO
  2.54545454545455
CACUUUUUUAUCUUCAGACAAAACCAAUUCAGAGCCUGAGUUUGGCCUCUGGCUCUGGCUGUGA
GGUUUGUUCGUCUUCAGCAG
>random_seq_from_cds__NO_12977    RANDOM_LENGTH 89 SEQ_LENGTH    78
  GC_CONTENT    0.58974358974359 BASEPAIR    28 FREE_ENERGY
  -33.90 LEN_BP_RATIO    2.78571428571429
UGAUUGUGACAACACCGGGGGCCCCACACUGAGGUGUCUCUGGCUACAGGGAGACGCAGAAUUG
GGUGUCCAUGUGGGAGCAAAGUG
>random_seq_from_cds__NO_12980    RANDOM_LENGTH 88 SEQ_LENGTH    77
  GC_CONTENT    0.571428571428571  BASEPAIR    26 FREE_ENERGY
  -27.10 LEN_BP_RATIO    2.96153846153846
AGAGUACACCACCAGCAUGUGGGGAGCUUCAUCGCUCAGGGACACUAUGGCUCCAGAUAAAGACA
GGACUCCUCGAGGCUUCUGGUGU
>random_seq_from_cds__NO_13004    RANDOM_LENGTH 110 SEQ_LENGTH    93
  GC_CONTENT    0.505376344086022  BASEPAIR    30 FREE_ENERGY
  -24.93 LEN_BP_RATIO    3.1
GGAGCAAGUUACUCAGAUGGAAAACUGAAAGCCCCUCCUAAACCAUGUGCUGGCAAUCAAGGGAC
CCAGAUACACGGGUGGAGGACCUUUUUUACAACAUAAGCCACGAGGA
>random_seq_from_cds__NO_13013    RANDOM_LENGTH 82 SEQ_LENGTH    73
  GC_CONTENT    0.547945205479452  BASEPAIR    29 FREE_ENERGY
  -25.30 LEN_BP_RATIO    2.51724137931034
CCCUGUCCAGUCAGCCCCAGGCCAUUGUCACAGAGGAUAAGACAGAUUUUCUAGUGGCAGGGCU
AGGCAGCAAGAUGAGGA
>random_seq_from_cds__NO_13014    RANDOM_LENGTH 80 SEQ_LENGTH    65
  GC_CONTENT    0.569230769230769  BASEPAIR    21 FREE_ENERGY
  -23.32 LEN_BP_RATIO    3.0952380952381
GAUGCUUGAACUCCAGCCCCUGCUGAAGUGGCUGCCAAAAAUCAGAGCUUGGAGGGGGAUACAA
CAAAGGGGACUUCAG
>random_seq_from_cds__NO_13019    RANDOM_LENGTH 84 SEQ_LENGTH    75
  GC_CONTENT    0.6 BASEPAIR    26 FREE_ENERGY    -27.10 LEN_BP_RATIO
  2.88461538461538
CGGGAGCCAGCACCGCUCUUUGACCUUGCCAUGCUUGCCUAGAUAGUCCAGAGAGUGGCUGGAC
AGAGGAAGAUGGUCCAAA
>random_seq_from_cds__NO_13020    RANDOM_LENGTH 84 SEQ_LENGTH    55
  GC_CONTENT    0.363636363636364  BASEPAIR    20 FREE_ENERGY
  -16.20 LEN_BP_RATIO    2.75
```

---

GAAGGACUUGCUGAAUACAUUGUUGAGUUUCUGAAGAAGAAGGCUGAGAUGCUUGCAGACUAUUU  
CUCUUUGGAAAUUGAUGAG

>random\_seq\_from\_cds\_\_NO\_13022      RANDOM\_LENGTH 82    SEQ\_LENGTH      62  
GC\_CONTENT      0.451612903225806      BASEPAIR    21    FREE\_ENERGY  
-16.80    LEN\_BP\_RATIO    2.95238095238095

UCAUUCUUCGACUAGCCACUGAGGGUGAAUUGGGACGAAGAAAAGGAAUGUUUUGAAAGCCUCAG  
UAAAGAAUGCGCUAUGU

>random\_seq\_from\_cds\_\_NO\_13032      RANDOM\_LENGTH 88    SEQ\_LENGTH      59  
GC\_CONTENT      0.576271186440678      BASEPAIR    20    FREE\_ENERGY  
-22.10    LEN\_BP\_RATIO    2.95

CGGCGGGAGGGGAUAAAUCGAUUCAUGUAAAGCUGGACGUGGGCAAGCUGCACACCCAGCCUAAG  
UUAGCGGCCAGCUCAGGAUGGU

>random\_seq\_from\_cds\_\_NO\_13038      RANDOM\_LENGTH 97    SEQ\_LENGTH      91  
GC\_CONTENT      0.582417582417582      BASEPAIR    26    FREE\_ENERGY  
-35.90    LEN\_BP\_RATIO    3.5

UGCCAGCCCGUGCCUCAUCCCUCAACUCCAGUGACAUCUUCUUGCUGGUCACAGCCAGCGUCUGC  
UACCUCUGGUUUGGGAAGGGCUGUAAUGGUG

>random\_seq\_from\_cds\_\_NO\_13040      RANDOM\_LENGTH 70    SEQ\_LENGTH      59  
GC\_CONTENT      0.728813559322034      BASEPAIR    21    FREE\_ENERGY  
-29.30    LEN\_BP\_RATIO    2.80952380952381

UUCUGGGAGGCCUGGGAGGCCGGGCCCCCUACCCAGCAACAAGAGGGCUGCCUGAGGAGGUCC  
CCAGC

>random\_seq\_from\_cds\_\_NO\_13045      RANDOM\_LENGTH 87    SEQ\_LENGTH      71  
GC\_CONTENT      0.690140845070423      BASEPAIR    24    FREE\_ENERGY  
-37.30    LEN\_BP\_RATIO    2.95833333333333

GCGGCUAUCCAGAUGGCCGGGCAAUGGCAGGGCAGGUGCCGUGGCCUGCAGGCCCUCAAGGGCU  
CCCAGGACAGCUCAGAGAAUGA

>random\_seq\_from\_cds\_\_NO\_13052      RANDOM\_LENGTH 92    SEQ\_LENGTH      84  
GC\_CONTENT      0.535714285714286      BASEPAIR    30    FREE\_ENERGY  
-24.10    LEN\_BP\_RATIO    2.8

CAGCCUGGCUUGCAAAGGCCUCAUUGAUCUCGAAGAUGUCCACGUCACUCACUGUCAGCCCCUG  
CUUUUUGCAAAGCUACUGGGAUGGCAU

>random\_seq\_from\_cds\_\_NO\_13072      RANDOM\_LENGTH 110    SEQ\_LENGTH      84  
GC\_CONTENT      0.380952380952381      BASEPAIR    29    FREE\_ENERGY  
-20.90    LEN\_BP\_RATIO    2.89655172413793

CUCCUUAUCAUAAAUAUCCACCAAUGAAGGGUUUUAUGCUGACACUGCAGAACGAUCCUCCUUC  
UUUGGAAACUGGUGUUAAGAUAAAAGAAUGCUGAAAAAAUAUGG

>random\_seq\_from\_cds\_\_NO\_13085      RANDOM\_LENGTH 63    SEQ\_LENGTH      52  
GC\_CONTENT      0.634615384615385      BASEPAIR    20    FREE\_ENERGY  
-16.60    LEN\_BP\_RATIO    2.6

CUGAACAGCUGGUACUGAGCGUGCCCCUGGACACUGCAGGUCACCCAGAGCCCUGCCUCAUGU

>random\_seq\_from\_cds\_\_NO\_13087      RANDOM\_LENGTH 84    SEQ\_LENGTH      65  
GC\_CONTENT      0.538461538461538      BASEPAIR    21    FREE\_ENERGY  
-17.90    LEN\_BP\_RATIO    3.0952380952381

UAUCCUGAGAACAGGCUCCCAUCCUGAAGAAUGAGGUUCAACCUGGUUUUGUGAUCGGAAGCACC  
UGAAGGACACCACACAGUC

>random\_seq\_from\_cds\_\_NO\_13098      RANDOM\_LENGTH 82    SEQ\_LENGTH      70  
GC\_CONTENT      0.585714285714286      BASEPAIR      24    FREE\_ENERGY  
-25.82    LEN\_BP\_RATIO    2.916666666666667

UGCCCUGGUGGUCACCAUGCUGGCUGUGGGGAAGAUGGCCACAGCUGCUGCCUUACCAUC  
UCCUAUGUGUACUCUGC

>random\_seq\_from\_cds\_\_NO\_13112      RANDOM\_LENGTH 85    SEQ\_LENGTH      71  
GC\_CONTENT      0.591549295774648      BASEPAIR      24    FREE\_ENERGY  
-20.86    LEN\_BP\_RATIO    2.958333333333333

UAUCCUGGGACACUGCUUUUUCGCUGUUGGGCCGUGUUGCUGACAGGGAUCGCCUACAGUCUUC  
CCCACUGGCAGCUGCUGUUU

>random\_seq\_from\_cds\_\_NO\_13115      RANDOM\_LENGTH 75    SEQ\_LENGTH      58  
GC\_CONTENT      0.53448275862069    BASEPAIR      20    FREE\_ENERGY  
-19.00    LEN\_BP\_RATIO    2.9

UGCCCAGAAAGAAGGUGACUCGGGCCUCUGUCCUGGACUUCUGUAAGAAUAGGCAGCUCUGCAAG  
GUGACCUUGG

>random\_seq\_from\_cds\_\_NO\_13125      RANDOM\_LENGTH 90    SEQ\_LENGTH      70  
GC\_CONTENT      0.5    BASEPAIR      26    FREE\_ENERGY      -28.20    LEN\_BP\_RATIO  
2.69230769230769

UGCACAAGGAUGGGCUGACGGUCACUUCUCCAGUACUAAUGUGGGUCCAGGGCACUGGAUAUCAU  
CUUGGAGAAGAUGAAGGCUUCGGGC

>random\_seq\_from\_cds\_\_NO\_13129      RANDOM\_LENGTH 85    SEQ\_LENGTH      59  
GC\_CONTENT      0.525423728813559      BASEPAIR      24    FREE\_ENERGY  
-17.90    LEN\_BP\_RATIO    2.458333333333333

AAAUUGCAAAAUUUACCAGCAGAACCCCGAGGCCUACUCACAUACGGAGGAGAAUUUCUUUGGU  
CAGUAGCUUUGCUGCUUCCC

>random\_seq\_from\_cds\_\_NO\_13131      RANDOM\_LENGTH 78    SEQ\_LENGTH      58  
GC\_CONTENT      0.586206896551724      BASEPAIR      21    FREE\_ENERGY  
-21.11    LEN\_BP\_RATIO    2.76190476190476

CUGGUCCAGGCUUGCCUUGGUGCCUGUGCACCUCAUUUAGAGGAGAAGCUUAGCCCACCAGUAC  
CAUCAUGCUCAGU

>random\_seq\_from\_cds\_\_NO\_13133      RANDOM\_LENGTH 88    SEQ\_LENGTH      78  
GC\_CONTENT      0.615384615384615      BASEPAIR      26    FREE\_ENERGY  
-29.60    LEN\_BP\_RATIO    3

CUGGCAGGCAUGAGACUGGAGGAAGGUGACAUUGCGGGUCAGCCUGGGCACCAGUGACACCCUGU  
UUCUCUGGCUCCAAGAGCCCAUG

>random\_seq\_from\_cds\_\_NO\_13134      RANDOM\_LENGTH 82    SEQ\_LENGTH      71  
GC\_CONTENT      0.549295774647887      BASEPAIR      19    FREE\_ENERGY  
-22.14    LEN\_BP\_RATIO    3.73684210526316

CCUGCCCUGGAAGGCCACAUCUUCUGCAACCCGGUUGACUCCAGCACUACAUGGCACUCCUGUG  
GCUUUAAAAAUGGCUCC

>random\_seq\_from\_cds\_\_NO\_13142      RANDOM\_LENGTH 84    SEQ\_LENGTH      60  
GC\_CONTENT      0.766666666666667      BASEPAIR      24    FREE\_ENERGY

---

-32.30 LEN\_BP\_RATIO 2.5  
GAAUCUUGUCUCAGACCCGGGGCCUCCGGAGUGACAUGACGGCGCCCUGGGUGGCCUCGCCCC  
CCUCUGGGGAUCGCUGUGC  
>random\_seq\_from\_cds\_\_NO\_13149      RANDOM\_LENGTH 84    SEQ\_LENGTH      67  
GC\_CONTENT      0.686567164179104      BASEPAIR      23    FREE\_ENERGY  
-33.10 LEN\_BP\_RATIO 2.91304347826087  
GGUGGGCCUGAAGCCACUGCAGCUGCUGGAGAUCAAGGCUCGGGGCGCUUUGGCUGUGUCUGGA  
AGGCCAGCUCAUGAAUGA  
>random\_seq\_from\_cds\_\_NO\_13160      RANDOM\_LENGTH 90    SEQ\_LENGTH      71  
GC\_CONTENT      0.549295774647887      BASEPAIR      24    FREE\_ENERGY  
-27.70 LEN\_BP\_RATIO 2.958333333333333  
CAUCUAAGUUAUUCUGUGGUAGAGAUCUGGGCCUGGCUGUCCAGCCCCUCAGCCUCCGUCCCAGU  
AUCUAGGCCCCUCUGUGCUUGCUGGU  
>random\_seq\_from\_cds\_\_NO\_13173      RANDOM\_LENGTH 81    SEQ\_LENGTH      71  
GC\_CONTENT      0.535211267605634      BASEPAIR      23    FREE\_ENERGY  
-18.20 LEN\_BP\_RATIO 3.08695652173913  
UUCUCCACAUUGGCUUUCAGUAGUGCCUUCAGGGUGUCAUUCUCCUUGUUCAGCCUCGAGUGCC  
CAAUGGUGAUGAUGAA  
>random\_seq\_from\_cds\_\_NO\_13175      RANDOM\_LENGTH 77    SEQ\_LENGTH      58  
GC\_CONTENT      0.637931034482759      BASEPAIR      20    FREE\_ENERGY  
-24.10 LEN\_BP\_RATIO 2.9  
GGCUGCUCAGCGCUGACGCCAGGCCAUCUCACACCGGCACAGGCUCCAUAUAGAGAUGCUGGGA  
CAGUGUCCUCAA  
>random\_seq\_from\_cds\_\_NO\_13181      RANDOM\_LENGTH 87    SEQ\_LENGTH      52  
GC\_CONTENT      0.557692307692308      BASEPAIR      19    FREE\_ENERGY  
-20.90 LEN\_BP\_RATIO 2.73684210526316  
CACCAGGGUCACUAGUACCAAGAUGUCAGCUGGAUGGAAGCAGCUGAGGUUGUCCAGGUUCCCC  
ACGCUCCCUUCCUCCUCUUCU  
>random\_seq\_from\_cds\_\_NO\_13194      RANDOM\_LENGTH 87    SEQ\_LENGTH      73  
GC\_CONTENT      0.657534246575342      BASEPAIR      28    FREE\_ENERGY  
-33.20 LEN\_BP\_RATIO 2.60714285714286  
GACAGGGCGGGUGAAACUUCUGGGGCCGAGAAGUCACGGUCAGGCAGGGGCAUCUGAUCCCAGG  
GGCCUUCUCCUCUGAGUCCCA  
>random\_seq\_from\_cds\_\_NO\_13206      RANDOM\_LENGTH 90    SEQ\_LENGTH      82  
GC\_CONTENT      0.536585365853659      BASEPAIR      24    FREE\_ENERGY  
-30.20 LEN\_BP\_RATIO 3.416666666666667  
CACGGAAGACUGGUCUGCAGCUCACUGCUCAGGCCACUGAAUGGGUAGGAGCAACCACUGACU  
GGUCUUAAGAUGUUCACUGUGCUGA  
>random\_seq\_from\_cds\_\_NO\_13209      RANDOM\_LENGTH 82    SEQ\_LENGTH      71  
GC\_CONTENT      0.464788732394366      BASEPAIR      22    FREE\_ENERGY  
-20.70 LEN\_BP\_RATIO 3.22727272727273  
UGGUUAUUGUCUGGAUGCCGGGUCUUCAAGAACCACAGUCUACGUGUAUCAAUGGCCAGCAGAAA  
AAGAGAAUAAUACCGGA  
>random\_seq\_from\_cds\_\_NO\_13214      RANDOM\_LENGTH 71    SEQ\_LENGTH      61

---

GC\_CONTENT 0.639344262295082 BASEPAIR 20 FREE\_ENERGY  
-30.80 LEN\_BP\_RATIO 3.05  
UCCUGGAGGAAGAACCUGUGGCACAUGUGGGUGCACCCGCAUGGAGUGGAAACCACGGGUGCCCU  
GGACUU

>random\_seq\_from\_cds\_\_NO\_13220 RANDOM\_LENGTH 92 SEQ\_LENGTH 78  
GC\_CONTENT 0.448717948717949 BASEPAIR 25 FREE\_ENERGY  
-19.00 LEN\_BP\_RATIO 3.12  
CAAAGAUUAAAGGGCCAUUUGUGGGCUUUUGCAGGAUUCUACUACACAGCCAGUGCUUUAUAUCU  
UUCAGGUAGCUUUUCCUGGACACCUU

>random\_seq\_from\_cds\_\_NO\_13237 RANDOM\_LENGTH 85 SEQ\_LENGTH 81  
GC\_CONTENT 0.827160493827161 BASEPAIR 32 FREE\_ENERGY  
-48.10 LEN\_BP\_RATIO 2.53125  
CCGCCCGCUGGCUAUGCGUGCUGGCAGGCGCCUCGCCUGGGCCCUUGGGCCGGCGGGGCGGCCA  
GGCGGCCAGGCUGCAGGAGG

>random\_seq\_from\_cds\_\_NO\_13244 RANDOM\_LENGTH 89 SEQ\_LENGTH 69  
GC\_CONTENT 0.608695652173913 BASEPAIR 25 FREE\_ENERGY  
-25.26 LEN\_BP\_RATIO 2.76  
AGUGCUCCGAGGGCUCGGGUGGGCUGUAAGGCAGCCAUGGUCUUUUCCAAUAUUGUGUCAUGGC  
UAACUUCUUCUGGCUGCUGGUGGA

>random\_seq\_from\_cds\_\_NO\_13245 RANDOM\_LENGTH 86 SEQ\_LENGTH 72  
GC\_CONTENT 0.597222222222222 BASEPAIR 27 FREE\_ENERGY  
-26.80 LEN\_BP\_RATIO 2.66666666666667  
GGGCCUCUACCUGUACACCCUGCUUGCCGUCUCCUUCUUCUCUGAGCGGAAGUACUUCUGGGGGU  
ACAUAUCAUCGGCUGGGGGG

>random\_seq\_from\_cds\_\_NO\_13258 RANDOM\_LENGTH 94 SEQ\_LENGTH 68  
GC\_CONTENT 0.573529411764706 BASEPAIR 21 FREE\_ENERGY  
-17.10 LEN\_BP\_RATIO 3.23809523809524  
AUUUGCCCGCAUCCUCCUACUGACCUAGUGGCAUUAACCUCCAGGAUCCUCAGCAUGGAUUCUC  
CUGCCCCUGAAGCUUCUGCCCUUCCAG

>random\_seq\_from\_cds\_\_NO\_13260 RANDOM\_LENGTH 81 SEQ\_LENGTH 61  
GC\_CONTENT 0.557377049180328 BASEPAIR 21 FREE\_ENERGY  
-25.40 LEN\_BP\_RATIO 2.9047619047619  
GGAGGUGUCAGUAUGCUUCACUUCAGAGGAAUGGGCAUGUCUGGGCCCAAUCCAGAGGGCCUUGU  
ACUGGGAUGUGAUGCU

>random\_seq\_from\_cds\_\_NO\_13261 RANDOM\_LENGTH 86 SEQ\_LENGTH 79  
GC\_CONTENT 0.468354430379747 BASEPAIR 28 FREE\_ENERGY  
-35.00 LEN\_BP\_RATIO 2.82142857142857  
GGAGAAUUAUGGAAUUGUGACCUCCUAGGAAUGGGAGACCAUGACCGAGAAUGAGGAGGUGACA  
UCAAGCCAAGUAGUUCUCAA

>random\_seq\_from\_cds\_\_NO\_13286 RANDOM\_LENGTH 86 SEQ\_LENGTH 57  
GC\_CONTENT 0.298245614035088 BASEPAIR 23 FREE\_ENERGY  
-15.80 LEN\_BP\_RATIO 2.47826086956522  
AACCCUAUGGGUGUAAUGAUUGUAGUAAAGUUUUUAGGCAAAGAAAAACCUUACUGUACAUCAG  
AAAAUCCACACAGAUGAAAAA



---

>random\_seq\_from\_cds\_\_NO\_13294      RANDOM\_LENGTH 110 SEQ\_LENGTH      95  
GC\_CONTENT      0.663157894736842      BASEPAIR      37 FREE\_ENERGY  
-48.00 LEN\_BP\_RATIO      2.56756756756757  
ACCUCUUAAGGGCGCUCAGGCUCAGGGGAGGUGCGGGAGCUGGAGCUGCCUUGGGGGCUGCCUU  
GGCAUCAUCCUUCUUGGGCUCUGGCUUUUUGGGGGCCAUGCUAAG

>random\_seq\_from\_cds\_\_NO\_13298      RANDOM\_LENGTH 72 SEQ\_LENGTH      67  
GC\_CONTENT      0.626865671641791      BASEPAIR      23 FREE\_ENERGY  
-22.20 LEN\_BP\_RATIO      2.91304347826087  
UGGUAUCUGACCCUGGCUGGGGUGGAUGAGGUGGUGGCAUCUGGUGGUGCAUCAGAGGGUAGGGA  
GGGGGCU

>random\_seq\_from\_cds\_\_NO\_13315      RANDOM\_LENGTH 81 SEQ\_LENGTH      59  
GC\_CONTENT      0.440677966101695      BASEPAIR      22 FREE\_ENERGY  
-16.50 LEN\_BP\_RATIO      2.68181818181818  
AUACUCUUGGGGUUUAGACGAUACGUGUCAUAUAAAAUUUCGAUAUGCCAAGUAUCAUUUCU  
GGAGUCUUGGAUUUGU

>random\_seq\_from\_cds\_\_NO\_13339      RANDOM\_LENGTH 72 SEQ\_LENGTH      64  
GC\_CONTENT      0.6875 BASEPAIR      19 FREE\_ENERGY      -24.25  
LEN\_BP\_RATIO      3.36842105263158  
CAGGGACCCAGGAGCCCCACCACUCUCUCUCCGGGGGACCUCGCUCACCCCUUCUGGCCUG  
AAGUCCU

>random\_seq\_from\_cds\_\_NO\_13345      RANDOM\_LENGTH 84 SEQ\_LENGTH      77  
GC\_CONTENT      0.662337662337662      BASEPAIR      24 FREE\_ENERGY  
-36.52 LEN\_BP\_RATIO      3.20833333333333  
UCGGAUACCAGGCACUCCAUCUUCUGGGGAUCCCCGGGUCACCAGGGAUCCUGCUGCACCA  
GGUUGACCCUGGGGUCCC

>random\_seq\_from\_cds\_\_NO\_13349      RANDOM\_LENGTH 70 SEQ\_LENGTH      57  
GC\_CONTENT      0.824561403508772      BASEPAIR      22 FREE\_ENERGY  
-39.00 LEN\_BP\_RATIO      2.59090909090909  
CGCUCUCCCCUGCUGCCAGGGGGCCCCGUGAGUCCUCGGGGUCCUCCUGGCCGGGGCGGCCAU  
CUUCA

>random\_seq\_from\_cds\_\_NO\_13360      RANDOM\_LENGTH 90 SEQ\_LENGTH      80  
GC\_CONTENT      0.7125 BASEPAIR      29 FREE\_ENERGY      -43.30  
LEN\_BP\_RATIO      2.75862068965517  
AGACCCCGGGCACCAGGUGGUCCAGGGUCUCCAUGACCACCCACUGGGCCAGGGGGCCUCUU  
GGACCCUGCAGACCCCGGCUUCCCU

>random\_seq\_from\_cds\_\_NO\_13373      RANDOM\_LENGTH 75 SEQ\_LENGTH      68  
GC\_CONTENT      0.705882352941177      BASEPAIR      23 FREE\_ENERGY  
-32.01 LEN\_BP\_RATIO      2.95652173913043  
GGUUUGCCAUCUCCUGCCUGGCUUCCCCGGUAAUCCAGGGGGACCAGAGGGGCCAGGGAGGCCCU  
GUUCUCCACG

>random\_seq\_from\_cds\_\_NO\_13375      RANDOM\_LENGTH 75 SEQ\_LENGTH      61  
GC\_CONTENT      0.704918032786885      BASEPAIR      20 FREE\_ENERGY  
-31.00 LEN\_BP\_RATIO      3.05  
CAGUCCGCUCCGGCCAUCCAGCCCAGGGGGACCCCGGUCACCCCUUUUCUCCUGCUGGGCCUCGG

ACACCUGGGU

>random\_seq\_from\_cds\_\_NO\_13384      RANDOM\_LENGTH 68    SEQ\_LENGTH      48  
GC\_CONTENT      0.75    BASEPAIR    19    FREE\_ENERGY    -27.13  
LEN\_BP\_RATIO    2.52631578947368

UGGGCCUGGGGUCCACGUUCGCCCCUUCUCUCCAGCCUCACCCAGGGGCCUGGAAAGCCCCGG  
UCA

>random\_seq\_from\_cds\_\_NO\_13386      RANDOM\_LENGTH 73    SEQ\_LENGTH      61  
GC\_CONTENT      0.704918032786885    BASEPAIR    23    FREE\_ENERGY  
-29.20    LEN\_BP\_RATIO    2.65217391304348

CCUUUUUCUCCUUUCUUUCCAGGGGGCCAACGGGGCCUUGGGGUCCAGGGCUUCCGGGAAGAC  
CCCCGCAG

>random\_seq\_from\_cds\_\_NO\_13392      RANDOM\_LENGTH 84    SEQ\_LENGTH      75  
GC\_CONTENT      0.6933333333333333    BASEPAIR    25    FREE\_ENERGY  
-30.20    LEN\_BP\_RATIO    3

CCGGGAGGCCAGGGUCGCCAGGAGGCCAACUUGUCCUCUCAGGCCCAUCUCUCCAGGUUCCCC  
CUUCUGGCCCCUUGGACA

>random\_seq\_from\_cds\_\_NO\_13393      RANDOM\_LENGTH 78    SEQ\_LENGTH      66  
GC\_CONTENT      0.6666666666666667    BASEPAIR    26    FREE\_ENERGY  
-35.60    LEN\_BP\_RATIO    2.53846153846154

AUACACUGGGCAGGGCUCUGGCCGGGGCCUGAGUAGUGAAGGAUGCCUGACACAGGGCUGUGGCC  
AGACCACUGACUG

>random\_seq\_from\_cds\_\_NO\_13415      RANDOM\_LENGTH 71    SEQ\_LENGTH      57  
GC\_CONTENT      0.701754385964912    BASEPAIR    22    FREE\_ENERGY  
-27.70    LEN\_BP\_RATIO    2.59090909090909

GAGUUUCCGGCUCGCCCGGCGGACAGUGAGGACACUGGCACUGCCCUCACGGGGACCCACUCGAGC  
AGACAC

>random\_seq\_from\_cds\_\_NO\_13417      RANDOM\_LENGTH 77    SEQ\_LENGTH      68  
GC\_CONTENT      0.705882352941177    BASEPAIR    26    FREE\_ENERGY  
-31.00    LEN\_BP\_RATIO    2.61538461538462

AGGGUCCGCUCAACCCCCUGGGUGCUGCGCACAAUGAUGCGGUACUGGGUGGCACCAGGGACUG  
GGCUCCAGGACA

>random\_seq\_from\_cds\_\_NO\_13428      RANDOM\_LENGTH 85    SEQ\_LENGTH      72  
GC\_CONTENT      0.6527777777777778    BASEPAIR    21    FREE\_ENERGY  
-28.47    LEN\_BP\_RATIO    3.42857142857143

GCUUGGCUCAGACAGCACCAGGUCUCGUGGAGCAGAGGUCGAGUCAUCCGCGAGGUCGGGUCACA  
GGCACGCCACCAGCAGUCGU

>random\_seq\_from\_cds\_\_NO\_13433      RANDOM\_LENGTH 84    SEQ\_LENGTH      54  
GC\_CONTENT      0.6111111111111111    BASEPAIR    19    FREE\_ENERGY  
-22.40    LEN\_BP\_RATIO    2.84210526315789

AUCACAUCACCCCAGAGCCAAGUGCAUCCAGGCCGAACUCUGUCCCGUGGGUCAUCGCGUACU  
GCACUGUGGCAAAGCGCAC

>random\_seq\_from\_cds\_\_NO\_13439      RANDOM\_LENGTH 68    SEQ\_LENGTH      56  
GC\_CONTENT      0.678571428571429    BASEPAIR    19    FREE\_ENERGY  
-25.50    LEN\_BP\_RATIO    2.94736842105263

ACUGUUCUGUGGAGGGGCCAUGGCUGGGGCCACUGACCGAGUCCUCCCUAGCUCUGAGCAGCUGC  
GGG

>random\_seq\_from\_cds\_\_NO\_13455      RANDOM\_LENGTH 73    SEQ\_LENGTH      65  
GC\_CONTENT      0.676923076923077      BASEPAIR    23    FREE\_ENERGY  
-24.50    LEN\_BP\_RATIO    2.82608695652174

GAGAGCCGUGUUGUAGGCCCCAGGUCCCCAGGCCAGGUGCUGGCCUUGCCUCCUCAGGCGCU  
GCCUCCU

>random\_seq\_from\_cds\_\_NO\_13474      RANDOM\_LENGTH 84    SEQ\_LENGTH      61  
GC\_CONTENT      0.672131147540984      BASEPAIR    22    FREE\_ENERGY  
-29.60    LEN\_BP\_RATIO    2.77272727272727

GAUCCUCAUUGAAGUGGGCAUCCUGUGUGGCUGUCAGCCCAGGCCUGCUGAUGGCUCUCGAA  
GGCCAGCAGGUGGGCCAGC

>random\_seq\_from\_cds\_\_NO\_13477      RANDOM\_LENGTH 95    SEQ\_LENGTH      90  
GC\_CONTENT      0.666666666666667      BASEPAIR    25    FREE\_ENERGY  
-31.10    LEN\_BP\_RATIO    3.6

CCAGCCAACCCUGGGCCUCAUCACACAGCCGCACAGCAGCACCCCAGGGCCCCCGGGGACAGGG  
CACUGUGGCCAGGACGCCAAACUUUGUCUG

>random\_seq\_from\_cds\_\_NO\_13479      RANDOM\_LENGTH 75    SEQ\_LENGTH      67  
GC\_CONTENT      0.701492537313433      BASEPAIR    23    FREE\_ENERGY  
-29.50    LEN\_BP\_RATIO    2.91304347826087

CCUCUGCGAAGGGACUGUCACAGCUGUUGCAGUGGCGGCCAAGGGCUCUGGGCGACAGGGGCAC  
UGCCCGCUGU

>random\_seq\_from\_cds\_\_NO\_13500      RANDOM\_LENGTH 99    SEQ\_LENGTH      88  
GC\_CONTENT      0.75      BASEPAIR    33    FREE\_ENERGY    -39.70  
LEN\_BP\_RATIO    2.666666666666667

CGAAAGCCGCCGUUGGGCGCGUCGGUGCAGGUGCCCCCGUUGCGGCAGACGCCCGGCACGCAGCG  
GCCGGCCUCGGUGUCCAGCUCGCAGUCCUCUCCC

>random\_seq\_from\_cds\_\_NO\_13505      RANDOM\_LENGTH 94    SEQ\_LENGTH      84  
GC\_CONTENT      0.678571428571429      BASEPAIR    30    FREE\_ENERGY  
-28.70    LEN\_BP\_RATIO    2.8

CCCUGCAGCGCCCGCCCGGCCACGUGGAGCUAGCGCCGAGAAACUCACAUUGAGCACGGUGC  
CCCCUACGUCUGUGUCGUUCUGGAUGUUG

>random\_seq\_from\_cds\_\_NO\_13508      RANDOM\_LENGTH 68    SEQ\_LENGTH      51  
GC\_CONTENT      0.666666666666667      BASEPAIR    22    FREE\_ENERGY  
-28.50    LEN\_BP\_RATIO    2.31818181818182

UGCGCCGUCACGCUGUGCAGGCCAUCCUGUGACAGUCACCAACAUGGAGGCCACCAGUGGGCGGU  
UAU

>random\_seq\_from\_cds\_\_NO\_13513      RANDOM\_LENGTH 109    SEQ\_LENGTH      78  
GC\_CONTENT      0.538461538461538      BASEPAIR    24    FREE\_ENERGY  
-29.35    LEN\_BP\_RATIO    3.25

GUUCCCUCCACGAUCUGGUACAUAUAUGGGCAUUGGGCCUUCGUCAGGGUCCACUGCAGUGA  
UCUGGGCCACCACUGAGCCCACAAUGCUAUUCUCUUUCACCCGC

>random\_seq\_from\_cds\_\_NO\_13523      RANDOM\_LENGTH 72    SEQ\_LENGTH      56  
GC\_CONTENT      0.589285714285714      BASEPAIR    20    FREE\_ENERGY

---

-23.70 LEN\_BP\_RATIO 2.8  
CCCCCUGGGUGCUGAUGGCCAAAGCGAUUCCGGGUGUUGCCGCCUGUGAUCUGGUAGCUGAUGGC  
ACUGUUG  
>random\_seq\_from\_cds\_\_NO\_13533      RANDOM\_LENGTH 72    SEQ\_LENGTH      54  
GC\_CONTENT      0.759259259259259      BASEPAIR    20    FREE\_ENERGY  
-28.00 LEN\_BP\_RATIO 2.7  
CGCACAGUGGCCGAGCGCGGCCCGGGUUCUGGCCUGGUCGUGGCUUCCACCACCAGCUCAUA  
GCUUUC  
>random\_seq\_from\_cds\_\_NO\_13540      RANDOM\_LENGTH 78    SEQ\_LENGTH      62  
GC\_CONTENT      0.596774193548387      BASEPAIR    24    FREE\_ENERGY  
-29.20 LEN\_BP\_RATIO 2.58333333333333  
CAACCACGCGUAGCACCGCGGUGCCUGCUGCCUCAUUCUCCGGCACCCAGCGUCUGGUAGUUGUAC  
UGCGGAAACUGCG  
>random\_seq\_from\_cds\_\_NO\_13545      RANDOM\_LENGTH 86    SEQ\_LENGTH      70  
GC\_CONTENT      0.714285714285714      BASEPAIR    25    FREE\_ENERGY  
-37.90 LEN\_BP\_RATIO 2.8  
GCGGUGCCCACUCUUUUGCGGGAGCCUGUCCAGCGUUCGCGUGGGAGGACACCGGCUUGGGACC  
GUGGUGCCGAAUCAAAAAGUC  
>random\_seq\_from\_cds\_\_NO\_13550      RANDOM\_LENGTH 70    SEQ\_LENGTH      58  
GC\_CONTENT      0.672413793103448      BASEPAIR    21    FREE\_ENERGY  
-21.00 LEN\_BP\_RATIO 2.76190476190476  
CAAAGAGCUAAGGCUCGCCACCGAU AUGCGCCUUGGCCCCGUAGUGGCAGCUAAGCCUGGGUC  
CCAGC  
>random\_seq\_from\_cds\_\_NO\_13551      RANDOM\_LENGTH 84    SEQ\_LENGTH      74  
GC\_CONTENT      0.675675675675676      BASEPAIR    25    FREE\_ENERGY  
-32.10 LEN\_BP\_RATIO 2.96  
CCUGGUGCCCACCGCCCCCAGCUCCUCCUGGCUGAGGGGAACAAAGAGAGGAGAAGGAGCAGG  
AGUAUGGGGGUCGACCGUC  
>random\_seq\_from\_cds\_\_NO\_13567      RANDOM\_LENGTH 75    SEQ\_LENGTH      69  
GC\_CONTENT      0.652173913043478      BASEPAIR    23    FREE\_ENERGY  
-25.40 LEN\_BP\_RATIO 3  
GGCAUCGGGCCUGGCGGGGUAGUAGCUUGCCUAGAGAUCUCAGCCGCACCCUCUGGCAAGGCCA  
UCUUUGUCA  
>random\_seq\_from\_cds\_\_NO\_13574      RANDOM\_LENGTH 71    SEQ\_LENGTH      54  
GC\_CONTENT      0.62962962962963      BASEPAIR    23    FREE\_ENERGY  
-27.30 LEN\_BP\_RATIO 2.34782608695652  
UGGGGAUGUCAUGCUGUACAGGGCUCUGGGUGGCUGCACCCGCCACACGUGAUUCUCCGGGAGG  
GUCUGC  
>random\_seq\_from\_cds\_\_NO\_13577      RANDOM\_LENGTH 71    SEQ\_LENGTH      50  
GC\_CONTENT      0.6 BASEPAIR    20    FREE\_ENERGY    -27.90 LEN\_BP\_RATIO  
2.5  
CACAGGCUCAGCCCACGCACUCACAGCUGUUUGUAACCAUAUCUCCUCGGUACGUGCUGUGGCUG  
UGUGGG  
>random\_seq\_from\_cds\_\_NO\_13583      RANDOM\_LENGTH 110    SEQ\_LENGTH      87

---

```
GC_CONTENT    0.620689655172414    BASEPAIR    29    FREE_ENERGY
-33.00    LEN_BP_RATIO    3
CAGCCUGGCUUUCUGGGAUUCACCAUGCUAGACCAUGACUCCACUGUCCUGGAGCCUCCAG
UGGAUCCUGGGCUUCCCUACCGGGCUUGGCACCCCCUCCUGACU
>random_seq_from_cds__NO_13589    RANDOM_LENGTH    72    SEQ_LENGTH    50
GC_CONTENT    0.6    BASEPAIR    21    FREE_ENERGY    -24.10    LEN_BP_RATIO
2.38095238095238
CCUGUGAGCCCUGAGUUUGGCCACCGUUGUGCCCUUGGGGUCAGGGGCUUGAGGUUACAACUG
GUAUGAC
>random_seq_from_cds__NO_13597    RANDOM_LENGTH    83    SEQ_LENGTH    64
GC_CONTENT    0.5625    BASEPAIR    24    FREE_ENERGY    -23.70
LEN_BP_RATIO    2.666666666666667
AGCAGGAAAGUUGGUGAUGAUGACCCGUGAGUACUCCAGCACAGCCAUGGCUCGUGGGGCGUGUGU
CAUUCAGCACAUACGCA
>random_seq_from_cds__NO_13608    RANDOM_LENGTH    69    SEQ_LENGTH    62
GC_CONTENT    0.516129032258065    BASEPAIR    22    FREE_ENERGY
-23.50    LEN_BP_RATIO    2.81818181818182
AGGUGCGCUUUAGUAGAUUCAUGGUGUGUGAGUGACCACAUAGCCUGGGGUCUUGUAGUUCUC
ACCC
>random_seq_from_cds__NO_13614    RANDOM_LENGTH    98    SEQ_LENGTH    86
GC_CONTENT    0.593023255813954    BASEPAIR    32    FREE_ENERGY
-33.40    LEN_BP_RATIO    2.6875
GCCGCUUAGCUGGGGUCAGUGUGGAUCUUCUACUGGCUAUGUAGCUUACAAGGAAGGAGAGAC
GCCGGUAUCCUGAGUCGGGAGGCCAAGCCAU
>random_seq_from_cds__NO_13616    RANDOM_LENGTH    80    SEQ_LENGTH    73
GC_CONTENT    0.657534246575342    BASEPAIR    27    FREE_ENERGY
-34.00    LEN_BP_RATIO    2.7037037037037
GCUGCGCGCUCAGAGCCGAGUUCUUGAGCGUCUCGCGGGCCUUCUGCUCGCUCAGGCCGAGGCUA
GUGAAGAGCGACAGG
>random_seq_from_cds__NO_13620    RANDOM_LENGTH    71    SEQ_LENGTH    59
GC_CONTENT    0.661016949152542    BASEPAIR    19    FREE_ENERGY
-21.72    LEN_BP_RATIO    3.10526315789474
CUGGGCACGACCCUGGGCACUGCCUGCCGUUUCUUCUGCUGUAGAGGCUGCCAGACUAUUUCCUG
CCCGUU
>random_seq_from_cds__NO_13622    RANDOM_LENGTH    85    SEQ_LENGTH    71
GC_CONTENT    0.661971830985916    BASEPAIR    28    FREE_ENERGY
-34.50    LEN_BP_RATIO    2.53571428571429
GUACCCUGGUACAGGGUCUGCUCUGUGUCCCGUGUGUCAGCCACUGCCCCCGGAUGGCACCCUG
GGCAAUACCCUGUGCCCGCU
>random_seq_from_cds__NO_13627    RANDOM_LENGTH    82    SEQ_LENGTH    62
GC_CONTENT    0.67741935483871    BASEPAIR    20    FREE_ENERGY
-22.00    LEN_BP_RATIO    3.1
GCUGCCUGGGCCCGCUGCUGUGCCUCGCUUGCCUGCCGACGAGUCUCAGCCACUCUGCUGAGGAU
GCUACCACCUUCUGCCA
```

---

>random\_seq\_from\_cds\_\_NO\_13629      RANDOM\_LENGTH 95    SEQ\_LENGTH    88  
GC\_CONTENT    0.636363636363636    BASEPAIR    27    FREE\_ENERGY  
-27.91    LEN\_BP\_RATIO    3.25925925925926  
UCUCGACAGCCGGCACCCCCACAAGGGCUUGUAGCACAGGGUGCAUCCCCUGGUGCCCCACACAC  
CCAGCUCAUUUUAUGUCUGUCAGGCUCAGGG

>random\_seq\_from\_cds\_\_NO\_13634      RANDOM\_LENGTH 110    SEQ\_LENGTH  
103    GC\_CONTENT    0.650485436893204    BASEPAIR    35    FREE\_ENERGY  
-53.83    LEN\_BP\_RATIO    2.94285714285714  
UGCUCAGUGGCCUCCCCAAUUUCACGCCCGCAGCUCUCCUCUGUGGCCUCCACAAGCUGUGCAGUGG  
AGGCGGUCUGAGGUGUUGCGGGCACCUACGAUGCCCUGCACAAUGC

>random\_seq\_from\_cds\_\_NO\_13640      RANDOM\_LENGTH 75    SEQ\_LENGTH    67  
GC\_CONTENT    0.656716417910448    BASEPAIR    23    FREE\_ENERGY  
-29.20    LEN\_BP\_RATIO    2.91304347826087  
GCCACUGGUGAGGUUCCAGAAGUUGGGGCACAGCGGUCACAGCUAGGGCCCUGGACAUUGGGGA  
GGCAUGGGCA

>random\_seq\_from\_cds\_\_NO\_13642      RANDOM\_LENGTH 88    SEQ\_LENGTH    77  
GC\_CONTENT    0.649350649350649    BASEPAIR    26    FREE\_ENERGY  
-36.20    LEN\_BP\_RATIO    2.96153846153846  
UCGGGCAGCCUGCCCAUGGAAGCCAGGCUUGCAGUGGGCACAGUGUGGACCCUCUGUGUGGUGUA  
AACAGCGCAGGCAUUGCCCCGUG

>random\_seq\_from\_cds\_\_NO\_13649      RANDOM\_LENGTH 110    SEQ\_LENGTH    97  
GC\_CONTENT    0.639175257731959    BASEPAIR    33    FREE\_ENERGY  
-38.61    LEN\_BP\_RATIO    2.93939393939394  
CACUGGCAGGCCUUGACAGCCUGUGGGGCCAAAGCCAUAUAGCCAGGGGCACAGAGGUCACAGC  
GGCGCCCAACCACUCCAGGCUUGCACAGGCACUGACCACCAUGAG

>random\_seq\_from\_cds\_\_NO\_13655      RANDOM\_LENGTH 84    SEQ\_LENGTH    64  
GC\_CONTENT    0.609375    BASEPAIR    21    FREE\_ENERGY    -23.70  
LEN\_BP\_RATIO    3.04761904761905  
UCAGUCCAACUCUGCCCAUUGCUCAGGGACCCUGGGGCUCUAAGCGCAGCAGCAGGUCAUAGUC  
CAUAGCCUUCGGCACAGAG

>random\_seq\_from\_cds\_\_NO\_13656      RANDOM\_LENGTH 67    SEQ\_LENGTH    60  
GC\_CONTENT    0.616666666666667    BASEPAIR    21    FREE\_ENERGY  
-18.10    LEN\_BP\_RATIO    2.85714285714286  
GCCACCAGGAACUCCAGGGUCUGACCUUCCUGUAGCCGCACGAAGCCUGAGCCAGUCCAGGAUGG  
AG

>random\_seq\_from\_cds\_\_NO\_13667      RANDOM\_LENGTH 80    SEQ\_LENGTH    67  
GC\_CONTENT    0.686567164179104    BASEPAIR    25    FREE\_ENERGY  
-37.70    LEN\_BP\_RATIO    2.68  
GAUGCAAGCUCGGUGCACCCAUGCCCUCAGCAUGGGCUGGUGCCCCUGGGGCGGGUGCACACUCU  
GAGGCGUGUCCGUAG

>random\_seq\_from\_cds\_\_NO\_13670      RANDOM\_LENGTH 84    SEQ\_LENGTH    69  
GC\_CONTENT    0.594202898550725    BASEPAIR    25    FREE\_ENERGY  
-25.40    LEN\_BP\_RATIO    2.76  
GAGCUGUAGGGGUCUGGGAUAGGGAUGGCAGGGUCCAGCACACGAUAGAUGACCCUCGCCUUCAG

UGGAUGGCUCAAUCUCUGA

>random\_seq\_from\_cds\_\_NO\_13674      RANDOM\_LENGTH 75    SEQ\_LENGTH      68  
GC\_CONTENT      0.588235294117647      BASEPAIR    26    FREE\_ENERGY  
-22.00    LEN\_BP\_RATIO    2.61538461538462  
CCAUUCUCUGACUGCCACCAGGCUGCCCGCCGUGUGGUGCAAAGCUGGUGACUACAUUCUGGAU  
GCGAUGGCGUG

>random\_seq\_from\_cds\_\_NO\_13682      RANDOM\_LENGTH 75    SEQ\_LENGTH      60  
GC\_CONTENT      0.6666666666666667      BASEPAIR    23    FREE\_ENERGY  
-28.90    LEN\_BP\_RATIO    2.60869565217391  
CAGCGGCAGGGAAGGAGGCUUUGCCAUCUUGGCUGCACUGGGACUCACAGAGCCACACCCUGGAG  
GGCCUCCCC

>random\_seq\_from\_cds\_\_NO\_13687      RANDOM\_LENGTH 110    SEQ\_LENGTH      87  
GC\_CONTENT      0.597701149425287      BASEPAIR    31    FREE\_ENERGY  
-32.70    LEN\_BP\_RATIO    2.80645161290323  
GGAAAUGCAAAAAGGUGGUGGAGAAUGGGGCCCUUCUCUCCUGGAAGCUGGGCUGCUCCUGAA  
CCAGAACAGUGUGCCUGACAUUCAUGGUGUAGAGGCCCCUGCCAG

>random\_seq\_from\_cds\_\_NO\_13688      RANDOM\_LENGTH 70    SEQ\_LENGTH      63  
GC\_CONTENT      0.619047619047619      BASEPAIR    20    FREE\_ENERGY  
-23.80    LEN\_BP\_RATIO    3.15  
GGAGGGCGCAAUGUCUGCUCAGCUUGGCUACCCUGUGGGUUGGCACAUCGCCAAUAAGAAGC  
CCCCU

>random\_seq\_from\_cds\_\_NO\_13692      RANDOM\_LENGTH 89    SEQ\_LENGTH      63  
GC\_CONTENT      0.587301587301587      BASEPAIR    20    FREE\_ENERGY  
-23.10    LEN\_BP\_RATIO    3.15  
GAAGCUGGCACCACAGUUCUGGCCAGAUUCGCCAACGAUGACCAUUCUGGCUAUGUGGAGCC  
UACUGCAGUUGCUACCCUCCAC

>random\_seq\_from\_cds\_\_NO\_13695      RANDOM\_LENGTH 88    SEQ\_LENGTH      70  
GC\_CONTENT      0.614285714285714      BASEPAIR    23    FREE\_ENERGY  
-21.74    LEN\_BP\_RATIO    3.04347826086957  
AUCACCAGAUUGGAAACUGCCUCACCGCCUACUCGUUAUUCGCACCACCACCAGUGGAGUGCCCCG  
UGGCGGAGAACCCAACCAGCGCC

>random\_seq\_from\_cds\_\_NO\_13700      RANDOM\_LENGTH 85    SEQ\_LENGTH      72  
GC\_CONTENT      0.5833333333333333      BASEPAIR    24    FREE\_ENERGY  
-25.80    LEN\_BP\_RATIO    3  
CUGGCCUUCGCCUUUGGAGACCGAAACUGUAGCACCAUCACCCUGCAGAAUAUCACCCGGGGCUC  
CAUCGUGGUGGAAUGGACCA

>random\_seq\_from\_cds\_\_NO\_13702      RANDOM\_LENGTH 86    SEQ\_LENGTH      76  
GC\_CONTENT      0.618421052631579      BASEPAIR    25    FREE\_ENERGY  
-27.40    LEN\_BP\_RATIO    3.04  
UCGGCCUGCCUUCUCCAACGCCCUAGAGCCUGACUUUAAGGCCACAAGCAUCACUGUGACGGGCU  
CUGGCAGUUGUCGGCACCUAC

>random\_seq\_from\_cds\_\_NO\_13703      RANDOM\_LENGTH 72    SEQ\_LENGTH      58  
GC\_CONTENT      0.672413793103448      BASEPAIR    20    FREE\_ENERGY  
-27.22    LEN\_BP\_RATIO    2.9

AGUUUAUCCCUGUGGUACCACCCAGGAGAGUGCCCUCAGAGGCGCCGCCACAGAAGUGCCUGAC  
AGGGACC

>random\_seq\_from\_cds\_\_NO\_13704      RANDOM\_LENGTH 81    SEQ\_LENGTH      67  
GC\_CONTENT      0.582089552238806      BASEPAIR      27    FREE\_ENERGY  
-28.70    LEN\_BP\_RATIO    2.48148148148148

CUGAGAAGAGCAGUGAGGAUGAUGUCUACCUGCACACAGUCAUUCGGCCGUGGUGGUCGCAGCC  
AUCCUGCUCAUUGCUG

>random\_seq\_from\_cds\_\_NO\_13706      RANDOM\_LENGTH 110    SEQ\_LENGTH      88  
GC\_CONTENT      0.636363636363636      BASEPAIR      24    FREE\_ENERGY  
-24.13    LEN\_BP\_RATIO    3.66666666666667

AUCUUUGCAGACGAACUGGACGACUCCAAGCCCCACCCUCCUCCAGCAUGCCACUCAUUCUGCA  
GGAGGAGAAGGCUCCCCUACCCCUCCUGAGUACCCCAACCAGAG

>random\_seq\_from\_cds\_\_NO\_13715      RANDOM\_LENGTH 89    SEQ\_LENGTH      74  
GC\_CONTENT      0.567567567567568      BASEPAIR      24    FREE\_ENERGY  
-23.00    LEN\_BP\_RATIO    3.08333333333333

ACACACUUGUUGUAUGUGGCAGAGAAGAAGCGCCCCAAGGCCGAGUCCUUCUUUCAGACCAAAGC  
CUUGGACGUCAGUGCCAGCGAUGA

>random\_seq\_from\_cds\_\_NO\_13722      RANDOM\_LENGTH 82    SEQ\_LENGTH      68  
GC\_CONTENT      0.544117647058823      BASEPAIR      25    FREE\_ENERGY  
-25.00    LEN\_BP\_RATIO    2.72

GAGAACUUCUCUGGGAUCUACUGCAGCCUUCUGCCUUUGGGAUGCUGGUCAGCUGACAGCCAGAG  
AGUGGUCUUUGACUCGG

>random\_seq\_from\_cds\_\_NO\_13726      RANDOM\_LENGTH 85    SEQ\_LENGTH      57  
GC\_CONTENT      0.56140350877193    BASEPAIR      19    FREE\_ENERGY  
-18.60    LEN\_BP\_RATIO    3

ACAGCCACCCCAGAGCAAGAGAAUGUGCAGUAUGGCUGGCCUUGACUUUGAAGCAAUCCUGCUG  
CAGCCUGGCAGCCCUCCAGA

>random\_seq\_from\_cds\_\_NO\_13730      RANDOM\_LENGTH 78    SEQ\_LENGTH      64  
GC\_CONTENT      0.5625    BASEPAIR      24    FREE\_ENERGY      -29.40  
LEN\_BP\_RATIO    2.66666666666667

CAUGUGGCCUUUAUGGGUGGUUCCUUGGUGGCUUCAUUUCCUGCCACUUGAUUGGUCAGUACCC  
AGAGACCUACAGG

>random\_seq\_from\_cds\_\_NO\_13734      RANDOM\_LENGTH 84    SEQ\_LENGTH      62  
GC\_CONTENT      0.548387096774194      BASEPAIR      21    FREE\_ENERGY  
-22.40    LEN\_BP\_RATIO    2.95238095238095

AGACCCGAAUGUGCCUGUUCGGGCUCCUGCUCUAUCCAAAAGCACCCACGCAUUAUCAGAGGU  
GGAGUGGAGUCAGACAGC

>random\_seq\_from\_cds\_\_NO\_13747      RANDOM\_LENGTH 68    SEQ\_LENGTH      51  
GC\_CONTENT      0.588235294117647      BASEPAIR      20    FREE\_ENERGY  
-21.90    LEN\_BP\_RATIO    2.55

CCACGGUUGGCUAUGAUGCCAGAGCAUUGAGUGGCAGGUGCACACCAAAGCGGGCCUCACAGUG  
UGC

>random\_seq\_from\_cds\_\_NO\_13750      RANDOM\_LENGTH 81    SEQ\_LENGTH      61  
GC\_CONTENT      0.59016393442623    BASEPAIR      22    FREE\_ENERGY



-16.70 LEN\_BP\_RATIO 2.77272727272727

GGUGAUCCAGCUUCACGAUGCCCCUGAGGAAUCAGAUUCUUAUGCACUCGCCUCAGCUUGGCCCCG  
CUUCUGCCCCGUUCUUG

>random\_seq\_from\_cds\_\_NO\_13754 RANDOM\_LENGTH 99 SEQ\_LENGTH 70  
GC\_CONTENT 0.8 BASEPAIR 20 FREE\_ENERGY -23.30 LEN\_BP\_RATIO  
3.5

CGGCCGGGACUUGGAGGCGGUGCGGCGGGGUGCGGUUCAGUCGGUCGGCGGCGGCAGCGGA  
GGAGGAGGAGGAGGAGGAGGAGGAGGAGGAUGAG

>random\_seq\_from\_cds\_\_NO\_13760 RANDOM\_LENGTH 99 SEQ\_LENGTH 87  
GC\_CONTENT 0.459770114942529 BASEPAIR 25 FREE\_ENERGY  
-20.74 LEN\_BP\_RATIO 3.48

AGAGCUGAAGAAGAUUCUGGAUGACUGGGGGGAGACAUGCAAAGGCUGUGCAGAAAAGUCUGACU  
ACAUCCGGAAGAUAAAUGAACUGAUGCCUAAAUA

>random\_seq\_from\_cds\_\_NO\_13771 RANDOM\_LENGTH 94 SEQ\_LENGTH 67  
GC\_CONTENT 0.671641791044776 BASEPAIR 27 FREE\_ENERGY  
-36.40 LEN\_BP\_RATIO 2.48148148148148

GGGGGCCUUGGAGAGUGUGGUGGCAGGCAGUGAGGGGGCUGCUGAGGGUGCUAUCACCAUCGAGC  
UGGCCUCCUACCCCAUCAGUGACUUUGCC

>random\_seq\_from\_cds\_\_NO\_13775 RANDOM\_LENGTH 89 SEQ\_LENGTH 82  
GC\_CONTENT 0.597560975609756 BASEPAIR 25 FREE\_ENERGY  
-22.50 LEN\_BP\_RATIO 3.28

AUGCGGCCAGUUAACGGGCGCCGCCUCUACAAGGACUUUGUGCUCACGUCUAGUUUGAUGGCC  
CCUUUCGCCAGCUGACACCCACA

>random\_seq\_from\_cds\_\_NO\_13776 RANDOM\_LENGTH 81 SEQ\_LENGTH 66  
GC\_CONTENT 0.545454545454545 BASEPAIR 24 FREE\_ENERGY  
-27.50 LEN\_BP\_RATIO 2.75

AUGAGGUCCGCUUUGACCGCUUUGGUGAUGGUUAUUGGCCGCUACAACAUCUUCACCUAUCUGCGU  
GCAGGCAGUGGGCGCU

>random\_seq\_from\_cds\_\_NO\_13784 RANDOM\_LENGTH 80 SEQ\_LENGTH 73  
GC\_CONTENT 0.63013698630137 BASEPAIR 24 FREE\_ENERGY  
-28.40 LEN\_BP\_RATIO 3.04166666666667

CGGCCACGCUUCAUCAGUCCUGCCUCACAGGUGGCCAUCUGCCUGGCACUUAUCUCGGGCCAGCU  
GCUCAUCGUGGUCGC

>random\_seq\_from\_cds\_\_NO\_13793 RANDOM\_LENGTH 99 SEQ\_LENGTH 88  
GC\_CONTENT 0.568181818181818 BASEPAIR 31 FREE\_ENERGY  
-34.60 LEN\_BP\_RATIO 2.83870967741936

GCCUGGGCUGUCAGAAAGUAGAGGGUGGCACCUGGCUAUGUGGUGACCGUGUUGACCUGGCCAGG  
CACCAACCCUACACUCUCCUCCAUCUUGCUCUAAAC

>random\_seq\_from\_cds\_\_NO\_13796 RANDOM\_LENGTH 68 SEQ\_LENGTH 57  
GC\_CONTENT 0.56140350877193 BASEPAIR 20 FREE\_ENERGY  
-23.40 LEN\_BP\_RATIO 2.85

CCAGAACCAUCCACAUGACCUUUGGCCUGGAUGAGGAGGUUGGGGGUCACCAAGGCAUGGAGCU  
GUU

>random\_seq\_from\_cds\_\_NO\_13798 RANDOM\_LENGTH 81 SEQ\_LENGTH 64

```
GC_CONTENT    0.6875 BASEPAIR   24 FREE_ENERGY   -27.20
LEN_BP_RATIO  2.666666666666667
CUGUCUUUUUAUGAGUGAGCGGAGUCCCUGGUGGGUGCGGGUUACCAGCACUGGGAGGCCAGGCCA
UGCCUCACGCUUCAUG
>random_seq_from_cds__NO_13801    RANDOM_LENGTH 86 SEQ_LENGTH    77
GC_CONTENT    0.584415584415584    BASEPAIR   26 FREE_ENERGY
-34.00 LEN_BP_RATIO  2.96153846153846
CAGCUUUGACUUCUGUGGCACCGGAUGUGGACUUCAAGGGCUUUUGAGGAGCAGCUGCAGAGC
UGGUGCCAGGCAGCUGGCGAG
>random_seq_from_cds__NO_13804    RANDOM_LENGTH 71 SEQ_LENGTH    47
GC_CONTENT    0.617021276595745    BASEPAIR   20 FREE_ENERGY
-18.80 LEN_BP_RATIO  2.35
CUCACCCAUGAACCGCACACCCUGUGCUGCUGCAGACCACGAUGAACGGCUGCAUGAGGCUGUGU
UCCUCC
>random_seq_from_cds__NO_13807    RANDOM_LENGTH 87 SEQ_LENGTH    69
GC_CONTENT    0.652173913043478    BASEPAIR   24 FREE_ENERGY
-30.40 LEN_BP_RATIO  2.875
UUUGGCCGGCACAGCCUGAGCCCCUUGGCAAUACGGGCACGAGCACGCUUCCCAAGCUUGGGGUG
GGCAAUGUAGGCAAGUCGAUCG
>random_seq_from_cds__NO_13811    RANDOM_LENGTH 81 SEQ_LENGTH    71
GC_CONTENT    0.647887323943662    BASEPAIR   22 FREE_ENERGY
-27.30 LEN_BP_RATIO  3.22727272727273
AGAAGUUCCGGUUUAUGAAGUGGUGGUUUGUCCCUGGUCAGGGCCAUGCCCAGCUGGGCCCAGAAG
CUGCGCUGACCACUGG
>random_seq_from_cds__NO_13814    RANDOM_LENGTH 67 SEQ_LENGTH    53
GC_CONTENT    0.69811320754717 BASEPAIR   19 FREE_ENERGY
-22.70 LEN_BP_RATIO  2.78947368421053
CACUGACCCGGUCCGUGUGGGCCAGCACAAACAGCGUCUUGCGGCUGCCAUGACCCGAGGCCAC
AG
>random_seq_from_cds__NO_13819    RANDOM_LENGTH 72 SEQ_LENGTH    63
GC_CONTENT    0.666666666666667    BASEPAIR   24 FREE_ENERGY
-24.80 LEN_BP_RATIO  2.625
GGUCCUGUGCAAAGAUGCUGAGGCCUGGAGCUGGCCCGGACUGCCACACUUCACCCGGCUGGGC
AGACCGG
>random_seq_from_cds__NO_13835    RANDOM_LENGTH 84 SEQ_LENGTH    72
GC_CONTENT    0.486111111111111    BASEPAIR   21 FREE_ENERGY
-19.30 LEN_BP_RATIO  3.42857142857143
AUUGAAGGACAGGUUAAGCUUGCGCAGCUGUGUUAGGCCCUUGGAAGGCCUUGGUUUUAGUGAUGC
AUUUGUAGAGGAAGUUCUC
>random_seq_from_cds__NO_13837    RANDOM_LENGTH 78 SEQ_LENGTH    63
GC_CONTENT    0.634920634920635    BASEPAIR   21 FREE_ENERGY
-19.00 LEN_BP_RATIO  3
CGGCUCAGGUGGCUGAAGGUAUCGGGAUGUAGCUGGGGGAAGUGACGAGGGCACUCCAUGCAGGG
GUUGGGAGCGUGG
```

---

```
>random_seq_from_cds__NO_13840    RANDOM_LENGTH 62 SEQ_LENGTH    56
  GC_CONTENT    0.714285714285714    BASEPAIR    21 FREE_ENERGY
  -27.50 LEN_BP_RATIO    2.666666666666667
GAGGUUGCCCAGGCCAAGGAGGGCACCCGGGGCCACCUCAGUGCCUGCCUGCAGGGGUUCU
>random_seq_from_cds__NO_13842    RANDOM_LENGTH 71 SEQ_LENGTH    58
  GC_CONTENT    0.517241379310345    BASEPAIR    21 FREE_ENERGY
  -20.20 LEN_BP_RATIO    2.76190476190476
AUGGCUGAGGGACAGGGGAUAUGAGGGAUUUGGGCAGCGCAGGCACAGUCAUGAUGUUGUUGUAGC
UCAGGU
>random_seq_from_cds__NO_13844    RANDOM_LENGTH 74 SEQ_LENGTH    66
  GC_CONTENT    0.575757575757576    BASEPAIR    23 FREE_ENERGY
  -21.60 LEN_BP_RATIO    2.8695652173913
GGGCAGUUCCACUUGAGGUUGAGAUGCCGCAGGCUGGGCAGGUGGGCAAAGUCAGAAUCAUGGAG
GUGGUGGAU
>random_seq_from_cds__NO_13862    RANDOM_LENGTH 88 SEQ_LENGTH    82
  GC_CONTENT    0.634146341463415    BASEPAIR    29 FREE_ENERGY
  -33.90 LEN_BP_RATIO    2.82758620689655
CCUGUGUGGUUGCCCUCAGAGGCUGCAGGGGCCUGUUUGCUUCCAGCACCAGCGGGGACUUGUU
GCUGGCUGACUUGGACUCCUCAG
>random_seq_from_cds__NO_13865    RANDOM_LENGTH 86 SEQ_LENGTH    68
  GC_CONTENT    0.676470588235294    BASEPAIR    22 FREE_ENERGY
  -27.86 LEN_BP_RATIO    3.09090909090909
GCGAGGCCGAUACGCUCAUGAUGACCCGCCGGGCCUUGUCUGUCCACUCCUCGUCCUCCCCCA
GGGCCCAUGGUCAAUGGGGU
>random_seq_from_cds__NO_13892    RANDOM_LENGTH 97 SEQ_LENGTH    72
  GC_CONTENT    0.388888888888889    BASEPAIR    25 FREE_ENERGY
  -23.00 LEN_BP_RATIO    2.88
AGGUGUAUUUGAAGAAGAUGCCACAGCUAUUUCCAACUAUAUGAACCAGUUGUAUCAAGCUAUGC
AUCGGAUUUAUGAUGCACAGGAAUGAAUUAAG
>random_seq_from_cds__NO_13894    RANDOM_LENGTH 99 SEQ_LENGTH    76
  GC_CONTENT    0.407894736842105    BASEPAIR    22 FREE_ENERGY
  -17.54 LEN_BP_RATIO    3.45454545454545
CUACAUUGCAACAGUUUUCAAAAGUUUAUGAUGAGGCCUUAGCUCUUGUCAUGCAGUGCUUUAAC
UCAACUUGCUGAUGCCAUGAUGUCCCCAUUACC
>random_seq_from_cds__NO_13901    RANDOM_LENGTH 84 SEQ_LENGTH    70
  GC_CONTENT    0.528571428571429    BASEPAIR    25 FREE_ENERGY
  -18.61 LEN_BP_RATIO    2.8
AGUAAAACAGGCUUGGUGUCAUCUACCUGGGACAGACAGUUUUACUUCACGCAGGGUGGAAUUU
AAUGAGUCAGGCCCGUGGG
>random_seq_from_cds__NO_13902    RANDOM_LENGTH 68 SEQ_LENGTH    57
  GC_CONTENT    0.543859649122807    BASEPAIR    21 FREE_ENERGY
  -19.50 LEN_BP_RATIO    2.71428571428571
GAUGUAGCAGGAGGCCUGGCCAUGGACAUAGACAACUGUUCAGUGAUGGCUGUGGACUGUGAAGA
CAG
```

---

```
>random_seq_from_cds__NO_13912    RANDOM_LENGTH 110 SEQ_LENGTH    97
  GC_CONTENT    0.391752577319588    BASEPAIR    35 FREE_ENERGY
  -25.10 LEN_BP_RATIO    2.77142857142857
GGGAGAAGUGAAAGUAAUCUGUCAUCAGUCUGCUAUUAUUAUUGAGUCAAAACAAUGAGGGGGAAAA
GGAUAUGUGAUUCUGUUGGACUGGCAAACAGAUAGCUUUGCAUG
>random_seq_from_cds__NO_13918    RANDOM_LENGTH 110 SEQ_LENGTH    98
  GC_CONTENT    0.418367346938776    BASEPAIR    31 FREE_ENERGY
  -20.90 LEN_BP_RATIO    3.16129032258065
UUUAGGCGGCACAAAUGUUUUAGGGAGCGAGGGUUUGCUUAAGAUAAAAUGUAUUUCUGACCAGA
UCCCCUGUUUUUGGAGCACAGCUUUCAACUUUGAACAGAUCCGAA
>random_seq_from_cds__NO_13928    RANDOM_LENGTH 119 SEQ_LENGTH
  106 GC_CONTENT    0.433962264150943    BASEPAIR    30 FREE_ENERGY
  -25.73 LEN_BP_RATIO    3.53333333333333
GGCAAUCCUGUUUGUUUGCAAAAAGUAGCAGCACUGCAUCUCUCAAUUAUCUACCAGAAGCCA
UUUUCUGCAGCUCAUCUGCUACUCCUGAAUUCUUUCACGAUCGUUGCUAUCUA
>random_seq_from_cds__NO_13934    RANDOM_LENGTH 84 SEQ_LENGTH    70
  GC_CONTENT    0.628571428571429    BASEPAIR    23 FREE_ENERGY
  -26.70 LEN_BP_RATIO    3.04347826086957
UACAGGAUGGCAUCCUCCCCGGAUCAGGCGGAGCAGGUCCAGGUAGGCUGUUCUUGCCAUGUCC
ACUUGGGCACCAGACAGGA
>random_seq_from_cds__NO_13937    RANDOM_LENGTH 90 SEQ_LENGTH    83
  GC_CONTENT    0.602409638554217    BASEPAIR    27 FREE_ENERGY
  -33.80 LEN_BP_RATIO    3.07407407407407
UAGCAGUGCACCCUAGCAGCCUGGAGGUGUAUGACAGUGGUCUGGUUCCAAGCCUCGUGCUGGU
CAGCUCCGGAUUGCGUCAGGGUCUG
>random_seq_from_cds__NO_13943    RANDOM_LENGTH 71 SEQ_LENGTH    58
  GC_CONTENT    0.5 BASEPAIR    20 FREE_ENERGY    -19.60 LEN_BP_RATIO
  2.9
GAAGUCUUGGUUCAGAAUGGCAGUGUAGGAGUGCUGGAAGAACUCCAAGAGGCUGACUGCCAGGA
AAUGGA
>random_seq_from_cds__NO_13957    RANDOM_LENGTH 64 SEQ_LENGTH    57
  GC_CONTENT    0.596491228070175    BASEPAIR    20 FREE_ENERGY
  -18.10 LEN_BP_RATIO    2.85
CCAGGUAUCCCCAAUGACACUCGGUGCACUGGGCUGCCCAUCAUGCGGAGGUUACUGGAACCG
>random_seq_from_cds__NO_13967    RANDOM_LENGTH 86 SEQ_LENGTH    55
  GC_CONTENT    0.527272727272727    BASEPAIR    23 FREE_ENERGY
  -20.60 LEN_BP_RATIO    2.39130434782609
CUUACCAUCAGGCUUGAGGCUUUUUUAUCCAUCUUCACCACGGAGCAGCAAGACCAUGUCAAGUC
GGUGGAGUAUCUGAGAAAUA
>random_seq_from_cds__NO_13975    RANDOM_LENGTH 89 SEQ_LENGTH    79
  GC_CONTENT    0.746835443037975    BASEPAIR    28 FREE_ENERGY
  -34.00 LEN_BP_RATIO    2.82142857142857
GCUCGCCGGCCUGGGUUCGGCGGUGGUGGAUCUCCUCUUCUCCCCAGCACUGUGUGGCCACGC
GCCUCCCGACGGCCGCCUCAGCCA
```

---

```
>random_seq_from_cds__NO_14006  RANDOM_LENGTH 84 SEQ_LENGTH 59
  GC_CONTENT  0.491525423728814  BASEPAIR  19 FREE_ENERGY
  -18.70 LEN_BP_RATIO  3.10526315789474
GAAAAUUGGAAUUGGUCCCAUGACAGUAGACAAAAUUGGUCUGUUCUUAUUGCAGAUGAAUCAGA
CCCUGCUGAGAGCAUGGAG
>random_seq_from_cds__NO_14008  RANDOM_LENGTH 110 SEQ_LENGTH
  104 GC_CONTENT  0.836538461538462  BASEPAIR  37 FREE_ENERGY
  -60.20 LEN_BP_RATIO  2.81081081081081
GGCGGCGGGCGGAGCAGCGGCCGCGGCCCGCCGCGCAGCAGCAGCAGCAGCAGCAGCAGCAGCAGC
CGCCGCCUCCGACGCCCCAGCGGCAGCAGCACCCGCCACCGCCGC
>random_seq_from_cds__NO_14009  RANDOM_LENGTH 69 SEQ_LENGTH 63
  GC_CONTENT  0.825396825396825  BASEPAIR  24 FREE_ENERGY
  -32.80 LEN_BP_RATIO  2.625
CACGGCGCACACGGCCGAGGACGGCGGGCCCGGCGCCGCCUCCACCUCGGCCGCCGCAAUGGCG
ACGG
>random_seq_from_cds__NO_14010  RANDOM_LENGTH 77 SEQ_LENGTH 65
  GC_CONTENT  0.646153846153846  BASEPAIR  21 FREE_ENERGY
  -25.74 LEN_BP_RATIO  3.0952380952381
UCGGGGAGCGCAGGCCUCUGCCAGUCCUGAAGUGAUGCUGGGACAGUCGUGGAAUCUGUGGGUU
GAGGCUUCCAAA
>random_seq_from_cds__NO_14017  RANDOM_LENGTH 90 SEQ_LENGTH 54
  GC_CONTENT  0.611111111111111  BASEPAIR  19 FREE_ENERGY
  -18.40 LEN_BP_RATIO  2.84210526315789
UCUGCGGUGGGGCCAACCCUGUCCUGCUACUGUGAGUUCUUAAGUCAAGCCUGGCCUUAACUGCCC
CUCAAUACCAAAGCCAACCUUGCCU
>random_seq_from_cds__NO_14023  RANDOM_LENGTH 69 SEQ_LENGTH 53
  GC_CONTENT  0.679245283018868  BASEPAIR  21 FREE_ENERGY
  -22.60 LEN_BP_RATIO  2.52380952380952
CUCCACACCCUCCCCUGCCUGCCACUGAGCCAGCUUCUCGGUUAUCCAGUGAGGAGGGCGAAGGC
GAUG
>random_seq_from_cds__NO_14044  RANDOM_LENGTH 85 SEQ_LENGTH 72
  GC_CONTENT  0.416666666666667  BASEPAIR  27 FREE_ENERGY
  -17.70 LEN_BP_RATIO  2.66666666666667
GAGGGUAACUGUGUUUCCCGCUUCCUUGAUUAGGUUCACAAUGUCUGAAUGGGAAUUGUUGGUGA
UGGAACAUCCAUUUACUGCC
>random_seq_from_cds__NO_14048  RANDOM_LENGTH 86 SEQ_LENGTH 68
  GC_CONTENT  0.632352941176471  BASEPAIR  27 FREE_ENERGY
  -25.50 LEN_BP_RATIO  2.51851851851852
CACCGUGUUCAGCGAGUUCUGGCUGCCCUGCGGAGUGCGCUUCUCUUCUGUCAGCGAGGCCGGCU
GGUUGCUACUGUGAUGAGAGG
>random_seq_from_cds__NO_14056  RANDOM_LENGTH 81 SEQ_LENGTH 70
  GC_CONTENT  0.557142857142857  BASEPAIR  22 FREE_ENERGY
  -22.72 LEN_BP_RATIO  3.18181818181818
UGAGAACUAUUCUGGCUGUCUUCCUUUCCAGUGGUUGCCGACUUUGGGCUCUUCUUGGGAACUG
```



---

CAAUGUAAAUUUCUAUUUAUCUGAUGCCGGUGUCCUACAGUACUGGACCAAGUACUGUCCCAUG  
ACUUUUAGUAGAUGAUUAUAC

>random\_seq\_from\_cds\_\_NO\_14120      RANDOM\_LENGTH 86    SEQ\_LENGTH      62  
GC\_CONTENT      0.548387096774194      BASEPAIR      22    FREE\_ENERGY  
-22.80    LEN\_BP\_RATIO    2.81818181818182

CCUUCAGCGAGAACCAUGGGGUGGUGAUCCAGCCUGCCUAUAAGGACAAGAUAAACAUAUACCCAG  
CUGGGACUCCAAAACUCAACC

>random\_seq\_from\_cds\_\_NO\_14124      RANDOM\_LENGTH 106    SEQ\_LENGTH  
101    GC\_CONTENT      0.514851485148515      BASEPAIR      31    FREE\_ENERGY  
-32.49    LEN\_BP\_RATIO    3.25806451612903

AUAUCAAAAGACCCUAAGAAUCAGGUGGGGAAGGAGGUGAUCUGCCAGGUGCUGCACCUGGGGACU  
GUGACCGACUUUAAGCAAACCGUCAACAAAGGGCUAUUGGU

>random\_seq\_from\_cds\_\_NO\_14130      RANDOM\_LENGTH 81    SEQ\_LENGTH      67  
GC\_CONTENT      0.671641791044776      BASEPAIR      24    FREE\_ENERGY  
-33.60    LEN\_BP\_RATIO    2.79166666666667

AAACUCCUCCGAGGAGAAGAAGGGGGAGGUGAUGCUGCCACAGAGCAGGCAGCCCCCAGGCU  
CCUGCAUCCUCAGAGG

>random\_seq\_from\_cds\_\_NO\_14137      RANDOM\_LENGTH 98    SEQ\_LENGTH      85  
GC\_CONTENT      0.529411764705882      BASEPAIR      27    FREE\_ENERGY  
-28.06    LEN\_BP\_RATIO    3.14814814814815

ACAACGAUGACAUCUAUGGGGUGCCUGGAUCGGCAUAUUGUGGGCAUCUGCCUCUUCUGCCUG  
UCUGUUCUAGGCAUUGUAGGCAUCAUGAAGUCC

>random\_seq\_from\_cds\_\_NO\_14142      RANDOM\_LENGTH 75    SEQ\_LENGTH      61  
GC\_CONTENT      0.540983606557377      BASEPAIR      22    FREE\_ENERGY  
-23.12    LEN\_BP\_RATIO    2.77272727272727

ACUAGGCGUGCCUGGUUUUAUCACAAUCAGGGGUGCUAUGAACUGAUCUCUGGUCCAAUGAAC  
CGACACGCCU

>random\_seq\_from\_cds\_\_NO\_14144      RANDOM\_LENGTH 87    SEQ\_LENGTH      72  
GC\_CONTENT      0.513888888888889      BASEPAIR      25    FREE\_ENERGY  
-25.40    LEN\_BP\_RATIO    2.88

UGAAUAUUAACUCAAUUAGGUUCUGCUGGGUUCUGGAGUUGGGAGUGAAGUGGCUCUUGAGUGG  
CUCCCAGCACUUGUGGUAGUUC

>random\_seq\_from\_cds\_\_NO\_14153      RANDOM\_LENGTH 85    SEQ\_LENGTH      69  
GC\_CONTENT      0.521739130434783      BASEPAIR      22    FREE\_ENERGY  
-18.90    LEN\_BP\_RATIO    3.13636363636364

UAGCCCCUGGUCUCCUCAAGACAUCUAUGCUGAACCGCAUCCUCUCCUGAAUGACGCAGAUCU  
CAUUGGGCUGUACAAGCAUC

>random\_seq\_from\_cds\_\_NO\_14159      RANDOM\_LENGTH 110    SEQ\_LENGTH      81  
GC\_CONTENT      0.432098765432099      BASEPAIR      26    FREE\_ENERGY  
-22.90    LEN\_BP\_RATIO    3.11538461538462

UUUAACUCAGCCAUAAUGAUACCUGGAGGCUUAUCUGAGGCCAAACCCGCCACUCCAGAAAUCCA  
GGAGAUUGUUGAUAAAGGGUUAACACAGCUUGAAGAAAAACAA

>random\_seq\_from\_cds\_\_NO\_14173      RANDOM\_LENGTH 97    SEQ\_LENGTH      79  
GC\_CONTENT      0.455696202531646      BASEPAIR      26    FREE\_ENERGY

---

-22.80 LEN\_BP\_RATIO 3.03846153846154  
AGGUGGACUUUCCCUCUACAGAGAUUAGACAAAGCCCAUACUGCAUUCGGGUCAUGGUCAGGC  
GGUUUUGCUUUGAAAUAACCGCAAAGAGG

>random\_seq\_from\_cds\_\_NO\_14191      RANDOM\_LENGTH 98    SEQ\_LENGTH      81  
GC\_CONTENT      0.432098765432099      BASEPAIR    25    FREE\_ENERGY  
-17.20 LEN\_BP\_RATIO 3.24

AAACACUGGAUGCUACCUCGCUUUUUGGAUCUUCAGGAACAGUGAAAUGUUUCUCCAAUGAUA  
GGAUUGUAUGGUUUUUUAGCAAUGGCUCUUUA

>random\_seq\_from\_cds\_\_NO\_14212      RANDOM\_LENGTH 83    SEQ\_LENGTH      62  
GC\_CONTENT      0.516129032258065      BASEPAIR    21    FREE\_ENERGY  
-20.50 LEN\_BP\_RATIO 2.95238095238095

ACGAGAUUAAAAGGUGACCGAGGAGGUGUCCAUUUCUAAAAGGCUUACGUCGUGGGGGGCUAAG  
AGCCUUCUUUGUUUAUAUU

>random\_seq\_from\_cds\_\_NO\_14214      RANDOM\_LENGTH 102    SEQ\_LENGTH      97  
GC\_CONTENT      0.391752577319588      BASEPAIR    32    FREE\_ENERGY  
-20.50 LEN\_BP\_RATIO 3.03125

AGUGAAGUCUUUCCUGGUUGGUGAGCAGUUGUUGUCCAUUUCAGAGCCACGUUUUAAAUGUCAG  
UAUGCAAAGUUCUUUCCUUUCCACAACUUCUACUUU

>random\_seq\_from\_cds\_\_NO\_14222      RANDOM\_LENGTH 89    SEQ\_LENGTH      80  
GC\_CONTENT      0.4125    BASEPAIR    29    FREE\_ENERGY    -18.50  
LEN\_BP\_RATIO 2.75862068965517

AGAUAUUAGCAAGUGAACUUUUGGAUCUGAACUUCAGUCCUUGUGGGCCUGAUAAGUACACAU  
CAAUCUUCUGCUGUCUUCCAA

>random\_seq\_from\_cds\_\_NO\_14230      RANDOM\_LENGTH 90    SEQ\_LENGTH      73  
GC\_CONTENT      0.616438356164384      BASEPAIR    26    FREE\_ENERGY  
-33.80 LEN\_BP\_RATIO 2.80769230769231

CCACCCUGGGCGGGUGAAAUGCCUGUGGUCCUUGGUGGUCCUGGCCAUCGAGCGGUACGUGGU  
GGUGUGUAAGCCCAUGAGCAACUUC

>random\_seq\_from\_cds\_\_NO\_14231      RANDOM\_LENGTH 109    SEQ\_LENGTH      99  
GC\_CONTENT      0.686868686868687      BASEPAIR    31    FREE\_ENERGY  
-48.60 LEN\_BP\_RATIO 3.19354838709677

CGCUUCGGGAGAACCAUGCCAUCAUGGGCGUUGCCUUCACCUGGGUCAUGGCGCUGGCCUGCGC  
CGCACCCACUCGCCGGCUGGUCCAGGGUACAUCGAGGGC

>random\_seq\_from\_cds\_\_NO\_14233      RANDOM\_LENGTH 82    SEQ\_LENGTH      44  
GC\_CONTENT      0.681818181818182      BASEPAIR    19    FREE\_ENERGY  
-26.40 LEN\_BP\_RATIO 2.31578947368421

CACUUCACCAUCCCCAUGAUUAUCAUCUUUUUCUGCUAUGGGCAGCUCGUCUUCACCGUCAAGGA  
GGGCCGUGCCCAGCAG

>random\_seq\_from\_cds\_\_NO\_14272      RANDOM\_LENGTH 77    SEQ\_LENGTH      69  
GC\_CONTENT      0.521739130434783      BASEPAIR    25    FREE\_ENERGY  
-20.90 LEN\_BP\_RATIO 2.76

UUGGCACUGGUCUGGACGACAUCUUGAGACGAUCAGAAUUCAGUGGGAGAGAGAUGUUGAAAAG  
AACCGGGUGGAG

>random\_seq\_from\_cds\_\_NO\_14274      RANDOM\_LENGTH 66    SEQ\_LENGTH      48



```

GC_CONTENT    0.625  BASEPAIR  19  FREE_ENERGY  -21.50
LEN_BP_RATIO  2.52631578947368
GCCAAGUCCAGAGCCUCCAGGCUGAGACAGAAUCCUUACGUGCCCUGGAAACGAGGCCUGGAGAA
C
>random_seq_from_cds__NO_14278  RANDOM_LENGTH 74  SEQ_LENGTH  51
GC_CONTENT    0.627450980392157  BASEPAIR  19  FREE_ENERGY
-17.70  LEN_BP_RATIO  2.68421052631579
CCGUCCUGGGGCGUGUCUGGCUGUCCUGAUAAAACUGUGAGAUGGUGUGCAGUGUCGGAGCA
UGAGGCCAC
>random_seq_from_cds__NO_14285  RANDOM_LENGTH 89  SEQ_LENGTH  71
GC_CONTENT    0.535211267605634  BASEPAIR  27  FREE_ENERGY
-30.70  LEN_BP_RATIO  2.62962962962963
CUGAAGGAUGGUGCUGGGGAUGUGGCCUUUGUCAAGCACUCGACUAUAUUUGGAGAACUUGGCAA
ACAAGGCUGACAGGGACCAGUAUG
>random_seq_from_cds__NO_14288  RANDOM_LENGTH 71  SEQ_LENGTH  55
GC_CONTENT    0.509090909090909  BASEPAIR  21  FREE_ENERGY
-20.50  LEN_BP_RATIO  2.61904761904762
CUCAUGGGAAGGACCUGCUGUUUAAGGACUCUGCCCACGGGUUUUUAAAAGUCCCCCAGGAUG
GAUGCC
>random_seq_from_cds__NO_14290  RANDOM_LENGTH 81  SEQ_LENGTH  69
GC_CONTENT    0.565217391304348  BASEPAIR  25  FREE_ENERGY
-24.50  LEN_BP_RATIO  2.76
CCCCAACAGAUGAAUGCAAGCCUGUGAAGUGGUGUGCGCUGAGCCACCACGAGAGGCUCAAGUGU
GAUGAGUGGAGUGUUA
(3). 1442 Zou pseudo miRNAs
>EMBL_CDS:CAA01027  CAA01027.1  Homo sapiens (human) hypothetical
protein
CCCAACCCACCUCUCCUCUUUAGAGUAGGAGGGAACUCAGACAUGCUCACGGACGAAAGACGUC
UAAGACUUAGACAAAACGGAGGAGGAAGAGGUUGGA
>EMBL_CDS:CAA01501  CAA01501.1  Homo sapiens (human) hypothetical
protein
CACGUCGUACCGGAAGAAGAACUCGUGCGGCUCGGCGUCCCGGAACCCAGACCUCGCCGUAUCC
ACUCGGUGUCAGGACUCCGGUGUACGACGUG
>EMBL_CDS:CAA03059  CAA03059.1  Homo sapiens (human) CALPASUAUINE
HUMAINE
AAAAUCGGUUAUCAAGGGAUAUAAAACCUCCUUAACACUGAAGAGAAAUGGGUUAAGGAGAUAC
AUCCACCUUGAGUAACCUAGACUUU
>EMBL_CDS:BAA19117  BAA19117.1  Homo sapiens (human) hypothetical
protein
CCACAAAGUAACGAUCUACCUCCACCUUCCCGAAGGCCAGAACAAAGACUCUCACAACCGGGAUU
AUAAAAGUGAGGGUCUUUAACAUAGACCGUUCUUUCACGG
>EMBL_CDS:BAA24075  BAA24075.1  Homo sapiens (human) DSIF p160
GUAGAAGUCCUCUACCACAAGACCGACCCGAGGUGCAUCAGGUGGACUCGUUACAGUAGGAACA
UCUAC

```

---

>EMBL\_CDS:CAA02705 CAA02705.1 Homo sapiens (human) hypothetical protein  
UCUCCAAGUCUAAAAGGGGACCUGCCAUAACCGGAAACUCCCCUUUACCACCCCGGUAGA

>EMBL\_CDS:CAA02215 CAA02215.1 Homo sapiens (human) hypothetical protein  
GACCGUCCUAGACAAAAGGUGACACCCAGUCGUCGUGUGUCGUAACCACACUGAAGUCUCG  
GCAUCAUACCCCGACGACUGUGAGGGCCACCCUUUAGUCGAAGUGUUGUC

>EMBL\_CDS:CAB58589 CAB58589.1 Homo sapiens (human) FSH receptor  
CCCUCCAGUCUCCUAGAGACAGUGGAACGAGAGAACCUCUCUUUUUGGGACAAUCUCGUCAC  
UGUCUAGGCUACUACUGUAGGA

>EMBL\_CDS:CAA01870 CAA01870.1 Homo sapiens (human) hypothetical protein  
GUACCGGCGAGGGUAGCUGGCACACCCGGUCUGGUAACUCGCGUACCCGAGACCCGACCUCGCGU  
ACCGGGACGGUAGCUCGCGUACCCGGACUCGUACCUCGCGUACCACGGGCGUCCAUACCCUCGAC  
CGGAC

>EMBL\_CDS:CAA01506 CAA01506.1 Homo sapiens (human) hypothetical protein  
CAGCGAGUCGUAGACCAACUAGACACGCCACAAGACGUCGUGUCGCGCGGGCGGACGCGGUCCA  
CCAACUCGCUG

>EMBL\_CDS:BAA19935 BAA19935.1 Homo sapiens (human) BMAL1b  
AGACACAGGUACGAAAGAACCAUCAGUCACCUCGACGAAAGGCAAACGCCAACGUUAGGUGUGG  
UGACCAUGGUUCUCUCGACCUUUCGUCC

>EMBL\_CDS:BAA20771 BAA20771.2 Homo sapiens (human) hypothetical protein  
CGACGGGGGUAGUGAGUGGAAGCGACCUCUAAACGACGGGAAUCAUACCCUCUUUAACUUUGUC  
AUCACCAUCGUCAGCACCCCAUCA

>EMBL\_CDS:BAA20774 BAA20774.3 Homo sapiens (human) KIAA0316 protein  
UGAAACCUCGGUUCGGGGUCGCCCCAGAACCUCCGGCCCUUGAGCCAGACGAGAAGACGUUCC  
CCCACCAUCGGAAGCACUCA

>EMBL\_CDS:BAA20767 BAA20767.3 Homo sapiens (human) hypothetical protein  
UGAAAGUAGAGGAGAUCUUAUUAUGGAAAUUCGUAGAUCUCGGAUCCAUCUCUCCAUCUCCUCU  
UCGUCUUUCA

>EMBL\_CDS:BAA22954 BAA22954.2 Homo sapiens (human) hypothetical protein  
CCGGACCUGAUCCUCAAGCCACAGAGGUGUCGACGACGAGGAGUCGUGAAACUCCAGUCGAGGG  
CCGAGACCCCGGGUCUAGGUCACGGUCCAG

>EMBL\_CDS:BAA23691 BAA23691.3 Homo sapiens (human) KIAA0395 protein  
CGUCUACGAAGACCCCGUCUAGGACGACCCAGGAAGUCCGUUCCAGAGUCGCCCCGACCCGGAG  
GUACGACCGUAGAACG

>EMBL\_CDS:BAA20837 BAA20837.2 Homo sapiens (human) hypothetical protein  
CACCCUCGCUCUACCCUACGUGACCCUAUGACUCCACGGGGAAACGGUAGAUUCGAGGGUA

>EMBL\_CDS:BAA20763 BAA20763.3 Homo sapiens (human) KIAA0304 protein

GUGGACCCCGAGACUCCUCCCCGCCCGACACGUGUUACCAGACCAAGAGGAGACGUCGGAGG  
UCCAC  
>EMBL\_CDS:BAA20808 BAA20808.2 Homo sapiens (human) hypothetical  
protein  
GUGAGUUGACUGUGUAGUAUAACAACGGAUCCGACACCGAGAAGGACACAGACCCCUGACCUCCA  
CACCCUCCGACGGUCGUUGUCUACACAGUCCUGUCCAC  
>EMBL\_CDS:BAA24848 BAA24848.2 Homo sapiens (human) hypothetical  
protein  
CCAAACCUCCCCUACCCCCCGCACCGGAAGAACGAGACCAACUGCCACAAGUCACGAACCUGCGC  
GGAGAGCUAGAAGAGGUCCGA  
>EMBL\_CDS:BAA24847 BAA24847.1 Homo sapiens (human) hypothetical  
protein  
UAGACCACAUCGGCGUCGAAAGCCGUAUCUAUCUCCGACGGAGUCCGAGGUUCCGUUACUACUC  
GACGAGGCUCAAGAGCCCCUCCGGUCCGGACGGACCAUCCGUCGAACAGAGUACUUGACGAACC  
GGCCGACGAAGGUCUA  
>EMBL\_CDS:BAA20773 BAA20773.2 Homo sapiens (human) KIAA0314 protein  
UCCUGAGCACUCUUCAGUCCGUCCCGACCACCAGUCAGUCUGUGUAUAGGAGACAGCCGAAGA  
AGUAAAAGGA  
>EMBL\_CDS:BAA32288 BAA32288.1 Homo sapiens (human) A-type  
microphthalmia associated  
AGACGGAGAGAAACCGGUCACGAGAACGAAGUCUGAGACACUCGAGGGAAAAUACAACCCUCC  
AACCGACCUGUCCUCAACGACUACCACUCCGGACACCCCCGUCU  
>EMBL\_CDS:BAA34700 BAA34700.1 Homo sapiens (human) hypothetical  
protein  
CCCUCUAACCCCAUCUCCUCCACGGCCCGUAAGUGCACCAUCGACAGCGGGCCGAGGAGGCAGAA  
GAAGGACGGA  
>EMBL\_CDS:BAA20839 BAA20839.2 Homo sapiens (human) hypothetical  
protein  
CCUAAGGUCAUCUAGGAGAGGUUUAAGGUACAGAUGACCAUCCAGAGGUCGGUCCCCGAAGAGAC  
CGUCCAGUUACCCAGUUUACCUGACCCUUUAGUGACCCCAGG  
>EMBL\_CDS:BAA20778 BAA20778.2 Homo sapiens (human) hypothetical  
protein  
GGUGAAGACGCUCGACCCACUACCACCGACGACUCCUGACCCGGCGGACCCGGUCGAACAGUCCU  
CACC  
>EMBL\_CDS:BAA19790 BAA19790.1 Homo sapiens (human) proteasome subunit  
p27  
UCCGGGCACCUCCCGGGACCGAGAGUGAGACUGGGUCAACGCGGAGUACCGGAGAAACACCCGG  
A  
>EMBL\_CDS:BAA20758 BAA20758.2 Homo sapiens (human) KIAA0298 protein  
GGAGAGGUUGGACCAUCUACUGUUGAGGUAGAGGUCUCACAACCUUUUCGGGUACUACGAGUCGC  
UCCACCUACGAAAGAGUGGUGUAAACCUCUCC  
>EMBL\_CDS:BAA20759 BAA20759.1 Homo sapiens (human) hypothetical  
protein  
AAAACCGACUCCACUAUUAAGAUCGACUCCGAACCGACUAAAUACUUAUCUUGACGGUCCGAU



---

>EMBL\_CDS:BAA25420 BAA25420.1 Homo sapiens (human) perilipin  
UCCCCGACUGAGAAGGAACAGACGUCCCUCUCAUGAGGUGGUGGAAGAGUUACGACGGGUUCC  
GGUUCAGCCGGGGA

>EMBL\_CDS:BAA22962 BAA22962.2 Homo sapiens (human) hypothetical  
protein  
GACGGACCGGCUCGACCAGUCUCUCGGUGUCGACGUACGCCUACUCCCCGAGGGCGGGGAAGACG  
CAGUCGAACGAGGUACCGAAGCCGGCCUGUC

>EMBL\_CDS:BAA20793 BAA20793.2 Homo sapiens (human) hypothetical  
protein  
CAACGGUAUUAAUUACGUUAUUAAUACGUUAUAGAGGUGACAACAUACGUAAACCAAACCGUUG

>EMBL\_CDS:BAA20760 BAA20760.2 Homo sapiens (human) hypothetical  
protein  
CCAGGGCGAGGGGACUCCCGUCGGUGGGAGGACCAUAACACCCACACGACCAAAGGCUACGACU  
AGCUCAGAACGACAUCAGUCCCCUCGGCGACGAAAGAGGGGGCCCCUCCCCGACGGGAGUACCC  
CCUCGGACUGA

>EMBL\_CDS:BAA20819 BAA20819.2 Homo sapiens (human) hypothetical  
protein  
CAGUAAGGUAUCUAACCGGGAACCGUGGACUCUAAGUCCGAAAGAGGUCCACGGUACUACCCGGG  
UCCUACCCGACAG

>EMBL\_CDS:BAA23698 BAA23698.3 Homo sapiens (human) hypothetical  
protein  
ACAAGACCACCACAGUGACUGACACUUGUAGGGUACGACAAGACCACCACAGUGACUGACA  
CUUGUAGGGUGCGACAAGACCACCACAGUGGCUGACACUUGUAGGGUACGACAAGACCACCCA  
CCAGUGACUGACACUUGU

>EMBL\_CDS:BAA24932 BAA24932.1 Homo sapiens (human) hypothetical  
protein  
GUGCCUGUGAGUCUGGCAAAGACACUCUAGACAAGACUCGGUAGAAACCGGUGUCGUCCACUAU  
GACGUAAACCGUUCUCACAGGCAC

>EMBL\_CDS:BAA20828 BAA20828.2 Homo sapiens (human) hypothetical  
protein  
GUACUUCAAAAAGAACCUCCAUAGAUAAAACAUUUACAUUJAGAAGAUGUUGUCUUAGAGCUCCU  
UCUCGAACCAC

>EMBL\_CDS:BAA19943 BAA19943.1 Homo sapiens (human) scFv collagenase  
IV antibody  
CUACCAGUUCUUCGACACAAAAGGACUCGACCUCGGUCUCUUAGCCAGACCCUAGGGACUCCCGG  
CCAACAAAAAUGGUAUCUACUGUUAUGUCCCCGGACAGGACCGAAGACGACCAUGGUCGAACGU  
AUUAUCGAAGACUCCGACAG

>EMBL\_CDS:BAA25666 BAA25666.1 Homo sapiens (human) hGLI2  
CACCCCGACCCGAGCUCUCCCGGCCCGACGUGAUCCGGUUUCGGACGACAUCGGUGGGGGUA  
GCCCCGACAAACCCCGAGGUA

>EMBL\_CDS:BAA20755 BAA20755.1 Homo sapiens (human) hypothetical  
protein  
ACGACAAGAAGCAUGACGACGGCCAUUCGGCACAACUACGAGUCUCCACCCACACCAUUGAGAC  
CAGCGACAUCGGUAUCCCCCAUGUAUCCGUAUGACCAACAUCAUGUCCUGACGU

---

>EMBL\_CDS:BAA21573 BAA21573.2 Homo sapiens (human) hypothetical protein  
GACCUAACUACUACGGUUUCUCGAGUAGUAAACACUGACGAAACCCUAACUCCAGUCAGGUC

>EMBL\_CDS:BAA20770 BAA20770.2 Homo sapiens (human) hypothetical protein  
UCGUCGAGGCAGAAAAAGUCCACAGACUACCUGUAAAGGUGUGACAUAGCGAACAUUUCUACGAC  
GACGA

>EMBL\_CDS:BAA32590 BAA32590.1 Homo sapiens (human) retina-specific amine oxidase  
CCUGACGGGGAAACGGGUGAUUUAUACCUACAGGUGGUAGCACCGAACUAUCCCCGUCAGG

>EMBL\_CDS:BAA23712 BAA23712.2 Homo sapiens (human) hypothetical protein  
ACAAGAGGCUGCCAGAACAGAACAAAAAGUCGCACAAGACAUACGAAAAGUCGUACCGACUCAGU  
AACCUUAACUCCGAUUGUCUUGAAGGGACUGAGUGUCCUGACGAAAACCUCCUGU

>EMBL\_CDS:BAA25535 BAA25535.3 Homo sapiens (human) KIAA0609 protein  
CAGGUCGAGUCUGUCGACGAAGACCUCGAAAUCUAGUCUGUGCAGAGACAUCGUGACGAGCCUCG  
CCCACACCAGACUGUCGACGUGUAAGGUCUUCGUCCCCUCGACCAUG

>EMBL\_CDS:BAA36409 BAA36409.1 Homo sapiens (human) NBR13  
CACGGAAGAGGAAGUCGCAGAGGCCACCUCCCGACCACACGUGCCACCCUAUGUGGAAGGGCGAC  
GGGUGUCAGGACGGCCUACGGAGUCUACCCCUUGGACCCUCCCCCGCG

>EMBL\_CDS:BAA32313 BAA32313.2 Homo sapiens (human) KIAA0468 protein  
GUCCGACCUACAAGCACCACCCGUCGUGGCGUCCACACCACCUUGUGGCGGUCCCGAUGUAGACC  
GAC

>EMBL\_CDS:BAA32312 BAA32312.2 Homo sapiens (human) KIAA0467 protein  
CCGUGCGCCCCGUCGACUACUCCCCUGUGGGAGUCUAGGAGACCCUGGGUCCACGAACCCC  
CGACCGACAGUCCCAGAGGGGAAGCUACGGAAGUCGGGACAGGAGUACUGACACGG

>EMBL\_CDS:BAA25898 BAA25898.1 Homo sapiens (human) sodium bicarbonate cotransporter2  
GACAUUGUGUCAAAUAGGAACCAUGACUUCUACUACUACUUCUUGUAUAAGGGGUACUAGAGAAG  
UGCCUUUACCUACUUGACACAAUGUC

>EMBL\_CDS:BAA32289 BAA32289.1 Homo sapiens (human) KIAA0444 protein  
CACGGGGCCCCAGAAAGAGUAGGUACAUCGGGUCGACCCGAAGGUAAAACAGACCGUCCGGGUCG  
CCCCGACCGUCCUCCACCCGUCGACCGCCCGUG

>EMBL\_CDS:BAA24112 BAA24112.1 Homo sapiens (human) osteonidogen  
CUACAAGGAAGAAACCACACUCCUAGGUUCCACCUUCUAAGGAGAUUUCGAAACAUAAGGUGAAA  
CCUAACCUUCCUUGUAG

>EMBL\_CDS:BAA25530 BAA25530.2 Homo sapiens (human) KIAA0604 protein  
CCGGGCAAACAUGAGGUGGUACAACGACGGUCGAGGGUCGAGGACGUCGCGCUGCAAGUACCACC  
UCAGCCCCG

>EMBL\_CDS:BAA25461 BAA25461.1 Homo sapiens (human) KIAA0535 protein  
CCUCAACCUUAUCUUCACAAUCUCCUUCUUAUCCCCACGUCUGAACAGGUCCUAAGCUAAAAAAA  
GUACGAAUUCAGGUUACACGGUAAAAGUAGGUGAAGAUAAAGCCGAGG

>EMBL\_CDS:BAA25458 BAA25458.1 Homo sapiens (human) KIAA0532 protein  
CCUAACGUCUGUCUAUCGACACCAAUAUUUUUAUAACUAUACCACAUAAUAACUAAUAACAUCA

GAACAGAAGUUAGA

>EMBL\_CDS:BAA25533 BAA25533.1 Homo sapiens (human) KIAA0607 protein  
AAGGAACUAGUCCUAGAGGGCCCCGGUAGAAGUUGCCAGUCCACCGUGGUCGGUCCGUCCUCCU  
CGGCCUCUCGCAGAGGACCGGUCCACCCGGGACCCACCACCCUCC

>EMBL\_CDS:BAA32319 BAA32319.3 Homo sapiens (human) KIAA0474 protein  
AACCAGCACCCGUAGAGACCCUUCGAGACUCACCUACUCAAGAGGCUGAACCCGAGGACACUCUG  
CACGGGCGACAGACC

>EMBL\_CDS:BAA31199 BAA31199.1 Homo sapiens (human) natriuretic  
peptide A type receptor  
CCUCGAGUCCCGGCAGGUGUCGAAAACCGUAUUUGCCACACAGGAACGAGACCCAGGUCCAGG  
GACUUCGAGA

>EMBL\_CDS:BAA25522 BAA25522.2 Homo sapiens (human) KIAA0596 protein  
CCUUCGGACUCCGGUCUCCCCGAAAAGUAAGACCGAUCACUCACUUCAGAGUUCGCGAGGACG  
GGUACGAAGGA

>EMBL\_CDS:BAA25526 BAA25526.2 Homo sapiens (human) KIAA0600 protein  
GGUGGAAGACAAAUCGGAACUUGCGUGAAAGUUAACCCAAGUCUCCGACAAAACGCCUCCCCC

>EMBL\_CDS:BAA25510 BAA25510.1 Homo sapiens (human) KIAA0584 protein  
ACAGACUACCCCGAAGUCCCCUACCCGUCCAUCGGUAUCACGAGAGACAACGUCUCCAUGUAGA  
CCUACGGACGAACGGACGACCUCUCCGUUUCUGU

>EMBL\_CDS:BAA25479 BAA25479.2 Homo sapiens (human) KIAA0553 protein  
GACCCCGUAAGAAACCCACACAUCAUAUAGUGGUAGGUAACAAGUGACCGAGAGUAUUUUUCA  
UCUUUCCUUUUAAUCCAAAUGAAACGUCACACGACCCCCUACAUCACCAUUAUGAGUCCGAG  
ACAUCGGGGUC

>EMBL\_CDS:BAA82611 BAA82611.1 Homo sapiens (human) ganglioside  
sialidase  
GGUACCACGGUACACUGGGGAUCCAGUAGUGACAUCUAGUAGUCUCUACUCCGGACCAAAAUGU  
ACCAUCGACC

>EMBL\_CDS:BAA25482 BAA25482.2 Homo sapiens (human) KIAA0556 protein  
CCACCAGGAAGACGUAGGACGUCACCCGACCGACCGACGAGCCGGAAAGACGACUCCUCGCGGGA  
GACGUCCCGACGCAAGAGGUGG

>EMBL\_CDS:BAA32136 BAA32136.1 Homo sapiens (human) aurora and  
IPL1-like  
ACACGUACGCGGGGAGUUAGUAGAGACCCCGUCCAUCAGGUCCCACGGUGUGUAACAGAAGGAG  
GAGUCCUCCCGCGUACGUGU

>EMBL\_CDS:BAA25505 BAA25505.2 Homo sapiens (human) KIAA0579 protein  
UACCACCACCACCACCACCAAGCCUAAGCUCCGUCCUJACAAAGGACACCUCGGCGGUGGCG  
GUGACGACGAUA

>EMBL\_CDS:BAA25467 BAA25467.2 Homo sapiens (human) KIAA0541 protein  
ACCGUUAAGACUGUUAUUUAACCAAACCUAAGGAGGAGUUUAUAACCGAGUCAUAGGACGUACAG  
UGAAUAAAGGCUCAUUGUUAGGUCUGGAAGUCCUACGGU

>EMBL\_CDS:BAA32295 BAA32295.3 Homo sapiens (human) KIAA0450 protein  
CCAGGGGGUCGUACCUCAGCGCGCCGAACCCUUCGACGACCGGUGACUACUAGGCCUCGUGGUCG  
ACGAAGAACUCGACGGGCCCGUCCCCCAGG

>EMBL\_CDS:BAA25474 BAA25474.1 Homo sapiens (human) KIAA0548 protein

UAAUCUGUCCCCGACACCUAUCUUUAAAGGACAUCCCCGAACGCUUCCGUAGAAGUGACCAGGAA  
AUAUCCUUGGGAGAUACGUAAAGGGAAACGGUCA  
>EMBL\_CDS:BAA24863 BAA24863.2 Homo sapiens (human) hypothetical  
protein  
GUCUUGUGGAGAUCUUAUGUGUCCUACUUCAAAUAAAUGUCACAGUAGUAGAACACAGGAGACUU  
CCAGAC  
>EMBL\_CDS:BAA32404 BAA32404.1 Homo sapiens (human) Stem cell growth  
factor-alpha  
UCCCCACCCUCUCCCCGACCCCGCCUCCUACCCCAACCGCAACGAAGGAGGAGGAGAAGGAGGG  
GGACCAGGAGGAGGUAGAGGGUCAGGA  
>EMBL\_CDS:BAA37096 BAA37096.1 Homo sapiens (human) hypothetical  
protein  
UAGACCAGCGGGUCCAACACGUCGGUCGGCUACGCACUCAGGUACACACCGACGAGGUACAACGG  
CUACCGCAUGGUCUA  
>EMBL\_CDS:BAA25519 BAA25519.2 Homo sapiens (human) KIAA0593 protein  
GUCAAGGAGGUCCACAACAUAGGUUAUGAUGGUUAUAAGAAAUAUAAGUAUAAGUAACCCCUUUUA  
GGGUUAUUAACAACAAGGUUACUACCACCACAUCCUAUGUAAAUAUCUUCUAGAC  
>EMBL\_CDS:BAA25478 BAA25478.2 Homo sapiens (human) KIAA0552 protein  
CUCCACCGUCCUCGAACCCACCCACCGACCCGAGUGCUAUGACGCCACCCCGAAACAGUGACGG  
UGGUGACGACGACGACGGAG  
>EMBL\_CDS:BAA32298 BAA32298.3 Homo sapiens (human) KIAA0453 protein  
CAUAGAACCCGAGUAGGUGACAACCUCUCCUCCACCCAGUUCCCUAUCAGGAACAGAACCUGA  
AGGAAAACGAAAAGGCCCUUGCGUCUCCACCCGAAACUAUG  
>EMBL\_CDS:BAB69038 BAB69038.1 Homo sapiens (human) kinesin-related  
protein  
AACGAGUACGAGACCGGUUCCGACCAAACGAGUAGCACAAAUUGAACCACCGACCUUGACCGAA  
CCUGUCACCGUACCCACC  
>EMBL\_CDS:BAB19784 BAB19784.1 Homo sapiens (human) MOP-3  
UACGACUAUUGGUCGGUAAUAGUUAACCAAAGGAGUCUUUACCUACAAAACAUGGUUUGUAGUCCU  
CCUCAUUGUAGCCUAUUUCUCGACCAAAGGUGAUGUCGUA  
>EMBL\_CDS:BAA32695 BAA32695.1 Homo sapiens (human) hypothetical  
protein  
UGGACGCAUGGAAACCCCCCGUGACCUCAGUAUCGUCACGAGUCAGGGGUCUACCAGGUGUCCA  
>EMBL\_CDS:BAA31684 BAA31684.2 Homo sapiens (human) KIAA0709 protein  
CGACGACCCCUGCCGAGUCCUCCCGAGGCACGGGAAGACCGUCUACUUCGGUACCCAGAGGAG  
GCACGUCGAGGCUAGCAGGGUCGCCG  
>EMBL\_CDS:BAA31593 BAA31593.2 Homo sapiens (human) KIAA0618 protein  
CGACGAGGGCGACGACCGCCAGACCCACCACCGAGGUUUCGGCCUCGACCACCGACGUGGCUUCU  
UCUGUCGUCACCUCGGCGGUUCCGCCCGACACUCGACCGCCUCGCG  
>EMBL\_CDS:BAA31613 BAA31613.2 Homo sapiens (human) KIAA0638 protein  
CCGGACCCGGACAUCACUCUACAGAGACCGACGUCUCGGUJAGUGGCAGGAGGGAAGGAGGUCG  
CCGUCCUCCACUACCGACACGACUCAGCGGGUGACGGGUCCGA  
>EMBL\_CDS:BAA31675 BAA31675.2 Homo sapiens (human) KIAA0700 protein  
AAGACGCGGACCGCCAUCUAGAAGUCGUCGGACCUCGUGUCCAGACCACGUCCGCGUCCU



---

>EMBL\_CDS:BAA31683 BAA31683.3 Homo sapiens (human) hypothetical protein  
ACCGAGUCCCAGGAGUGACAUCGAGACGUCGUCGACAAGUCGCGGGGUCACCCUUACUCGGU

>EMBL\_CDS:BAA74737 BAA74737.1 Homo sapiens (human) hypothetical protein  
ACUCGGUCAAGGAAGACCAUCCGACGCUACAUCCCCUAGGGGAAGUACGUCUGGAGCAUCCCCC  
GACCUAGU

>EMBL\_CDS:BAA31685 BAA31685.2 Homo sapiens (human) KIAA0710 protein  
AUAGGAGUAAGAGUAGGUCGUCCAUUAGUUUAUUAUACUCGCGGGGUGCCCGGUUAUAUGAACUCC  
AACAAAGAACCACUCUUUUUCCUAU

>EMBL\_CDS:BAA31649 BAA31649.1 Homo sapiens (human) KIAA0674 protein  
ACCGGAAAGAAUCCGACAAAACCCGACACAUGACCUUUUUAAGUAAAGGUACCGGUCGUCGACG  
GACUAGGUCAGGUUUUUCACUCCGGU

>EMBL\_CDS:BAA31616 BAA31616.2 Homo sapiens (human) KIAA0641 protein  
GAGACCCGGACUCCACCGGAGCCGGAGUCGGAGCUCCAGACUCUUCUACCGUCUCAGAGCCAUCC  
CUAAGAAGAGCAACUCCGGUGACUCCUCCACCUCUCGGCACAGAGCCCGGGCCCC

>EMBL\_CDS:BAA31604 BAA31604.2 Homo sapiens (human) KIAA0629 protein  
AGAAGGUGUACGUUUGGUAGAUGUGUCCAUUCACGACAUCUACUCUUUCAUACACUUACUCCU

>EMBL\_CDS:BAA36753 BAA36753.1 Homo sapiens (human) huntingtin  
CGGGACGGACCUCUAGGUCUGAGUCGCCUAGACGAGUACCUAGUUUACGGUCCUGUCCCG

>EMBL\_CDS:BAA31587 BAA31587.2 Homo sapiens (human) KIAA0612 protein  
GUCCCUCUGUGACAGACGGAGUCGAGGAGAUGGAGUGACCGACACAGGUGGAGUCCACAUCCCG  
UACUGAACCCCGACAACACCUACCUGAGCCUCACCCUCCUCAACCUCUCUCUGAGACGGAAGAAC

>EMBL\_CDS:BAA76877 BAA76877.1 Homo sapiens (human) LCAU-like  
lysophospholipase (LLPL)  
UCUUCUCAGACCACACCCUCGCGGUCACGGUAUCUCCGUCACGUCGACGUGCGGUCCACCGUAG  
CACCGAAGGUGGUCGGGAAGA

>EMBL\_CDS:BAA83718 BAA83718.1 Homo sapiens (human) RNA binding  
protein  
AGAUCUCGCCGCGGCUUAUCGACCUCACAGGCCUUGGAUCUCGCCGCCGCACAGUGACCACUCC  
AAGCUCUCGCCUGGAAGAAGCUCAAUGACCUCUACACGCUCUAGCUCUAGAGGAAGCCACUGG  
CCUCUACAAGACCUAGAACUAGAAGACGCUCACUAUCCGCUUCAAGACGAAGCUCUAGCGGAGGA  
CCAAUGACCACCUCAGGACCU

>EMBL\_CDS:BAA33713 BAA33713.1 Homo sapiens (human) HIP1R  
CCGGACUGAACCACCUCGUGGUGUAACCGUCGGGAGAGUAACUGACACGCUCUUGUAAGGACG  
UCCGCCGAGUCCACCCCGACACGAACAACCGGAAGUGGAACCUCGG

>EMBL\_CDS:BAA31606 BAA31606.2 Homo sapiens (human) KIAA0631 protein  
CUACGUGUCACAUCCUUCGACACCCGUCGACCCAGAUACGCGUCCGCGUGGGCGGGUAGCCGG  
GCUCAGCAGGUGUCGCGGAGGAGACCUCGUAG

>EMBL\_CDS:BAA34529 BAA34529.2 Homo sapiens (human) KIAA0809 protein  
UCUCGACAGGGCCUUGUCGUGACGACAGGUAUUAACCCGGCCCCCGGUCCGUCCCGCCGUAA  
CCACGAACCCUCGAGA

>EMBL\_CDS:BAB61018 BAB61018.1 Homo sapiens (human) hypothetical  
protein

AUACUGUCGGUACAAAGGGUCGACCCCGUGUGGUCCCGGUCGGGGACCGUACCGGACAAGGUAAG  
GAACGUACCAACAGUAC

>EMBL\_CDS:BAA34515 BAA34515.1 Homo sapiens (human) KIAA0795 protein  
GUCCACCGACACACCACCAACAUCACAAGGUGUGACGACUUCUAGACGUUUGGUAGUACCGGCGG  
AC

>EMBL\_CDS:BAA76776 BAA76776.2 Homo sapiens (human) KIAA0932 protein  
CUCUAGGAGGUCUGCGUCACCCUCAUUCUACCCAUGGGUAAACCCUUGGUCCACGUCUUUUCAA  
AGGGCAACACAGGACGUCCCAGAG

>EMBL\_CDS:BAA34517 BAA34517.2 Homo sapiens (human) KIAA0797 protein  
CUCUAUCUCCUCCUCAUCCGACUAUCCAUGAUGUCACGGCAAAGACAACAUGAAAGGAGAAUUAA  
AG

>EMBL\_CDS:BAA74870 BAA74870.1 Homo sapiens (human) KIAA0847 protein  
CUAUCCGAAAGAAAACCUCCUCGAAAAGAAAACGUCUUUGACCUCUCCUACUAAGGUUUCAACUC  
AGAUAG

>EMBL\_CDS:BAA74936 BAA74936.1 Homo sapiens (human) KIAA0913 protein  
GAACGAGUCCCAACAACCAUCGGUGGGUCCAGACUGCCGAGCACCUAUGGAACAAGAAGACGGGA  
ACUCCAGCCCACCAACCGAUCGUCUAGGACCCGUUC

>EMBL\_CDS:BAA76782 BAA76782.2 Homo sapiens (human) KIAA0938 protein  
GGUUACGGACUCCCCCGAAAAAGGAAGUAGAGGUGACGAAAAAGGACGUAGACUCCUCUAGA  
AACAUUCUACUAGGAAAAUCCCCUCGAAAAGGAAAGAGUCUUCGAAACC

>EMBL\_CDS:BAA34445 BAA34445.1 Homo sapiens (human) KIAA0725 protein  
UCGAAACCUAACACAUUUUUAUUUAAAGAGACAACCCUCUAAGGUCAAAGAAAAAGGUAAGUAG  
GUUUCAA

>EMBL\_CDS:BAA75631 BAA75631.1 Homo sapiens (human) semaphorin W  
CCGGUGUCAACCAACAUAAGUGAACACAGUGGAGUCAUGCCUCGGUUGGUCCUCGGUCGACACC  
AUGUUAAAGUACAAGAGUUGACCGACACCGA

>EMBL\_CDS:BAA34523 BAA34523.1 Homo sapiens (human) KIAA0803 protein  
CCGAAGAGAAACGUCAACGUAGAAACAUAUUUUAGGAAAUCUCUACUCUAACAUAACUACAUC  
GA

>EMBL\_CDS:BAA77349 BAA77349.1 Homo sapiens (human) hypothetical  
protein  
AACAGUCUCAGUCGAUCUCUAAGGAGUAUAAAUUCUUACACGAGUUGAUCCAUAUGUUGUACAAC  
UCAUGUUCGAAAGAAGUGUCCAAAUAUACUCCUAGGAGAAAGUCUGAAGUUGUU

>EMBL\_CDS:BAA34470 BAA34470.2 Homo sapiens (human) KIAA0750 protein  
UGGUGUCCCGAAACCGAAAGGUCCACCAGUGGAACCUGAACUCGAACCUUAUUUUCAAAGACACC  
A

>EMBL\_CDS:BAA34436 BAA34436.3 Homo sapiens (human) KIAA0716 protein  
CGUAACGACUCGACCUACCGACUCCAGCCGACCACUAGAGGUUAUACCAGGAGUCGUCUUUAGG  
UCGUUCGACCG

>EMBL\_CDS:BAA76374 BAA76374.1 Homo sapiens (human) interleukin-18  
binding protein  
ACUGGUCCUCUCACUGCUGCACCCGUGUGUCCUCGUCCUGGGUGUUUCCCGACUCCAGACCACAG  
GUCAACACAGAGUACCAGU

>EMBL\_CDS:BAA78717 BAA78717.1 Homo sapiens (human) hypothetical

protein

UAACCCUAACGUAAAAUAGUGUCAUCCACAUACUUUAUGAACGUAGCCUACUCAACGUCUGGGU  
UA

>EMBL\_CDS:BAA34508 BAA34508.2 Homo sapiens (human) KIAA0788 protein  
ACAAAACUUCGGGAGUUUGGGUCGGACCCGUAUGAAACCGUCGAAAAGGUGACCUUCGUCAACAA  
GAAGACUCGGUUUCCCGAACCCGAAGUCUCGU

>EMBL\_CDS:BAA34467 BAA34467.1 Homo sapiens (human) KIAA0747 protein  
CACGACCCUGUGGUCCUAGGGAUCGACACGAGAGUCAUCGUGGACGGGGACUGGUGACGACUCAC  
AUUUGGUCGCCAGGUUCGUCUCGACCAGUCGGUGCUCCUCGAGACUCUCCCCGUCCUAUUACUC  
GGGUCGUG

>EMBL\_CDS:BAA34480 BAA34480.2 Homo sapiens (human) KIAA0760 protein  
AGGUCCGUCUAGACUGUACACACCGAGACGACCCCGAACAGGCGCACCUACCAGAAGUCCACCUA  
GAGGUCGUGCCGGUCCGACAAUUUCAGGGCGAACCU

>EMBL\_CDS:BAA74887 BAA74887.2 Homo sapiens (human) KIAA0864 protein  
CCGGGCCCGACGGACACGGACGAGACUCGUCCUCCCGAGGGCCAAACGGUCCUGAGGAACGUCU  
CGACCUCGAGGAAGAGUAUAAGAUCGGCCUAAGACGUCCUGCGUAUCGUUUGGACCCGG

>EMBL\_CDS:BAA76801 BAA76801.2 Homo sapiens (human) KIAA0957 protein  
AGUGAAAAGGUAGGAACGGGGCCAUGUUACACAUCUCGACUAUGCGGGACUUGAGUACCCACCC  
CCACCCCUACU

>EMBL\_CDS:BAA83592 BAA83592.1 Homo sapiens (human) BEC2  
GCGGUGAGAGCCGGAGACACUACCUACCGUCGACAGAACAGACUCCUCCUCGGUCUCCGAAAGACUC  
GCCCCGACCCUCUCCGC

>EMBL\_CDS:BAA34513 BAA34513.2 Homo sapiens (human) KIAA0793 protein  
GAGGCGGUCGUAGUGACUCCUGUCCCGAGUCCUACCCCUACUCGGGACAAGUCGACCCGGGUU  
CCGUGGACUUUACGUCCCGAGUCUGAGUCCCGGAGAAGGCCGACCUCCUC

>EMBL\_CDS:BAA34482 BAA34482.2 Homo sapiens (human) KIAA0762 protein  
AGACCGAUGAACUCACUACCUAGGUGGGAGACCCAGUAUCUUUCCUGAGACUCCUACCAGGUCCG  
ACCAGUCCCGGCCU

>EMBL\_CDS:BAA77569 BAA77569.1 Homo sapiens (human) neuroD-related  
factor

ACGCUCUCAACUCGACGUCUGUCGGCCGGUGGUCUAACCACCACCCGACGCUGUCUGGGAACGU

>EMBL\_CDS:CAB38381 CAB38381.2 Homo sapiens (human) immunoglobulin  
heavy chain variable

AGAGGGAGUACUGGACACGUGGACUAAGUGAGGUCAGGGAAGGGACCCUCGACUCCUAGGUCG  
AGGUCGUCCUUCGUGACCAACACUACCUUCUUCGUCUCUGUCGUGUCUACUCCUCU

>EMBL\_CDS:BAA76791 BAA76791.3 Homo sapiens (human) KIAA0947 protein  
CUUUCAGAGCUCAGGUCUUAACAGUGAAAUAUAUGAAGGGUACAUAAGUCUCGAACCUAUCGAA  
GUACACUAAACCCGAAAA

>EMBL\_CDS:BAA86871 BAA86871.1 Homo sapiens (human) Maf-related DNA  
binding protein

UGCGCCGUCGACCGCCGAUCGGUGCCAAAACUCACACGCCGCGGCGACGAACUCGGCACA

>EMBL\_CDS:BAA75063 BAA75063.1 Homo sapiens (human) apg-1

AUCAACAGAUGUAUCCGAUGAGACCUAGCCAUCUAGUUAUGAAAACUGAAAAGGAAAAAUUCAC  
AGACUAAAUUAGCCAGAACAACAGACUCUGUCGAC

---

>EMBL\_CDS: BAB71953 BAB71953.1 Homo sapiens (human) male enhanced antigen-2  
CGGCGGAGGUUCUACUAGAAGAGCAAGACGUCCUCCGUCUAGCACAGGAGGGACCUCGCGCC

>EMBL\_CDS: BAA95162 BAA95162.1 Homo sapiens (human) vascular cadherin-2  
CGGAGGGACACCCCGACGGACGUUGGAAGUCUCCGGACCUCGACCCGACCCGGACACCGUCCGACC  
CCGAGCCCUUCCAAGUCCAAGAGGGCCCUCCG

>EMBL\_CDS: BAA86899 BAA86899.1 Homo sapiens (human) RECQL4 helicase  
GAGAAGUCGGUGUCGGUCCACGACACGGUGCAGUGACCGUCACGCCGCACACCGACACCGACACU  
C

>EMBL\_CDS: BAA76854 BAA76854.1 Homo sapiens (human) KIAA1010 protein  
CUCCGGGACCCGCAUGACCACCUUGAACCCGUCGAGUAGGUCGUCGACACGUAAGUCCCGGAG

>EMBL\_CDS: BAB19280 BAB19280.1 Homo sapiens (human) protein tyrosine phosphatase HD-PUP  
CGUCCGGGUCCACGAUGCCCGUAACGUACCCCGGGACCCCGGGACCCGACAUAGUCGACCCACCC  
CGGGCUCAUCCAUGGUCCCCGUUCCCCGGACUCUCUAUCACCCAGGACCCGGACA

>EMBL\_CDS: BAA86961 BAA86961.1 Homo sapiens (human) hypothetical protein  
CCACUCUGUGGGGUUGUUUGAGACGAAGGUUGACCAUACACUCACGUUCGUGAACCUACAGGCAC  
CGUCUCUCCGACCCCAUCAGAGGA

>EMBL\_CDS: BAA78033 BAA78033.1 Homo sapiens (human) sodium channel  
UAUGUUCAAAAGGGUUAUCAGGACCCAGUAUUCGCUUUAUACGGUUCUUCGGGUCGAUUUUC  
ACAGUUUUGAACACA

>EMBL\_CDS: BAA86559 BAA86559.2 Homo sapiens (human) KIAA1245 protein  
AGUAGUGAAAGUAAAAGACCCUAUUACACAUGUCGUAGGAGGGUAAGUUGUACUCUCCUACU

>EMBL\_CDS: BAA86582 BAA86582.1 Homo sapiens (human) KIAA1268 protein  
CUAGUGCACCACCAUCCCGUCGAAAGGACGGAACCCUCUACCACCGUAACGGGCCAUCCUCAGACG  
GGAGAGAGAAGUGAUAGACCAG

>EMBL\_CDS: BAA86534 BAA86534.1 Homo sapiens (human) KIAA1220 protein  
CCUGUCACGGUAUUCUGUAAAAGGUGAACAAACCUGUCCAGGACCUUUCAGGAAUACCCCAACAGG

>EMBL\_CDS: BAA83041 BAA83041.2 Homo sapiens (human) KIAA1089 protein  
UCUUCAGGCCUCCUUCGUAUAGGUGAGAGUAUGAGGAGGAGUAGGAGUGACCGGUCCGACUC  
CAACCCACUCCUCCGUCCAUCUUCUCCGUCUCCAACUUCAGGAGGUCCUGACUGA

>EMBL\_CDS: BAA86524 BAA86524.1 Homo sapiens (human) KIAA1210 protein  
CCGAGGUGCCUAGCGAGACAAAUAUCUUCACGGGUGACUUGACCACCCUGAACACGACUUG  
UCAUCCUAAGUAUUACCCGA

>EMBL\_CDS: BAA86560 BAA86560.1 Homo sapiens (human) KIAA1246 protein  
ACGUCACGCCGACCACGACAACGACUCCACACCGUCGACCUGCUACCUCUGGAGGUGGUACCGGC  
ACCGGAGAGGCCGUCGUAACCGUCGUUACGU

>EMBL\_CDS: BAA86545 BAA86545.2 Homo sapiens (human) KIAA1231 protein  
UCCGAGCGGGACCGGGCCACUCGUGGCCGGCCAACCCUAGCCCACGUUCCCCGGCACGAAGCC  
UGUGUGACUUCGUACGCGCAAUAACGUGAGGAGUGUGGUUCAGCACACCCAGCUUCCCCGGCCC  
CGCCCAGA

>EMBL\_CDS: BAA86526 BAA86526.2 Homo sapiens (human) KIAA1212 protein

AUCCUCCUCUACCCAGUAUUUUAAACAUAACUAGGUAAUUAAAAGAGAAGAUACAAAGAGGAAGAC  
>EMBL\_CDS:BAA86437 BAA86437.2 Homo sapiens (human) KIAA1123 protein  
CCGAGGUGACAGACGAAAGUUCGUUCCCGACCUCUAGAACGUUCUCGAAACCGUCCGUGGACAUG  
AGACACAGAGGUCGUCGAACACGUACCUCGA  
>EMBL\_CDS:BAA86592 BAA86592.1 Homo sapiens (human) KIAA1278 protein  
GCACCCAGAAACCACUCGUCAGGGACGUCCUUAAGAAUUUCGUCCUGACUACCAACUCCCGGU  
CGC  
>EMBL\_CDS:BAA83014 BAA83014.2 Homo sapiens (human) KIAA1062 protein  
UCGGGGGAAGAACC GCCCGGAGCGACCCGUCCUACAUCCUCUCGAGGCACGAACACAGACUCUGGU  
CGUCCGUCCUCCGGUGUACGAACGCCUACUUGACCCUGUGGACCUCGAGCCUCGUCGACGAGUCG  
CCCCGGGCUGGACCCCCCGA  
>EMBL\_CDS:BAA86561 BAA86561.2 Homo sapiens (human) KIAA1247 protein  
GGCGAACCACUCCAAAGCCCCGACCCGCCGUAGUGGGUCCGGAUGCACCAUGUGGGACGGCAGGU  
GGAGCUACCGGUGACUCGCC  
>EMBL\_CDS:BAA83045 BAA83045.2 Homo sapiens (human) KIAA1093 protein  
GCCGUGACGGUGGGAAAACCGUAACAACGGUGGUAACUGACCACCGCUACCUCUCGACGGUUAAC  
CCGACCGCCGGC  
>EMBL\_CDS:BAA82978 BAA82978.1 Homo sapiens (human) KIAA1026 protein  
CGGCCUCACCGUCCCCGAGUGGGACUGGCGAACGGCCAGGCGUCCACUCCCCCACACUCACC  
AUCUCUCAGACAACUGAGACGGCCUACCGACGCCAGUCGCCUCCAGGCGGACGUGGUGGGUGAG  
GACCA  
>EMBL\_CDS:BAA86054 BAA86054.1 Homo sapiens (human) fatty acid  
coenzyme A ligase 5  
CGGACUACUAUGGGAAAACUUCGAGAAACUAAAUGACCUUUGUCGGUCGAAGUUGUUCUUGAAG  
AAGUCCACAGAACCG  
>EMBL\_CDS:BAA92330 BAA92330.1 Homo sapiens (human) F-box and  
WD-repeats protein  
CGGUCAAUCUAAGAUUUCAGAGAUUAGGACCUAUUAGAAAACCAUUAUUCUGGAUUAUUUACUU  
AAACCUCCCG  
>EMBL\_CDS:BAA83019 BAA83019.1 Homo sapiens (human) KIAA1067 protein  
GGUCGACGCGACCAUCCAGACCUAGACGACGAGUUACACGAGGGCCAUCUCCGAGUCGUCAGA  
AGACACAGUGACGGUGGUCGACC  
>EMBL\_CDS:BAA83063 BAA83063.1 Homo sapiens (human) KIAA1111 protein  
CGAAGAAAGGAACAGGUCCGAGAUUCCGGUUAAGUUCGAAACGGUGGUACCUGGUCCAUCU  
CCG  
>EMBL\_CDS:BAA89345 BAA89345.1 Homo sapiens (human) hMYHgamma4  
GGAGGGACCCCCGAACGCCGACCGAAAGACCCCUUCAACUGGUGAGGGUCCAGACCAGGGUC  
CCGAGGCUCCCUCC  
>EMBL\_CDS:BAA86228 BAA86228.1 Homo sapiens (human) endomucin-2  
CAACAACCACACUGUUGUAAAAAGACAUUACUAAGACACAAACCACAACAUAUCUACCAAAACA  
ACAUCAUUGUUG  
>EMBL\_CDS:BAA88125 BAA88125.1 Homo sapiens (human) breast cancer  
associated protein  
CUCAAGAAUGACCGAAGAGACCACCAAGACCUAUCCUCUCUGGAGAUCCCUCCAGGAUCCUGAA

>EMBL\_CDS:BAA83016 BAA83016.2 Homo sapiens (human) KIAA1064 protein  
CCCGGCGGUCCCAGGUACCCACCCGGUCCUAAGUACGGUCCCGGGUAGCCGUACAGACGCACGUA  
CAGACGCACGUACAGUCCACGUACAGGCCACGUACAGCCCACGUACAGUCCUACGUAACCG  
GCGGGUAACCGGGACCCCCAGGGUACAACCCGGUCCCGGGUACCCGGGACCCCCAGG

>EMBL\_CDS:BAA82977 BAA82977.2 Homo sapiens (human) KIAA1025 protein  
CCCUUCCACGGUUUAGACAAUGGACACAUCCGAUGACCUCGGUCGAGACGGUCGUCGUAUAGG  
ACGGCCUGUAGACAAAUCAUCGUCUUGACUUUUUAUCUGUACCGUAAAAAGG

>EMBL\_CDS:BAA83000 BAA83000.2 Homo sapiens (human) KIAA1048 protein  
CUGGGACCCGGACUCAUCUCCGCAGACGACACCUCACCCUCCUCGGACACCGACGAACCGGACU  
CAAACGCCGUCUCCGACCGACCCACCCGAACCCCAA

>EMBL\_CDS:BAA86596 BAA86596.1 Homo sapiens (human) KIAA1282 protein  
CCGUCGACGUCCUGGAGGAACACGUCCACGUACCGCUACAGACGCGGUCGAGCAGUCCUCCGA  
GACGUCGUCGA

>EMBL\_CDS:BAA86591 BAA86591.2 Homo sapiens (human) KIAA1277 protein  
GUCGUGGCCUACAUCACACGACGGUCCGCUUCCCAUCUAGUCGCGGUGGUAGCGCACCGUCG  
UGAACCUGUCCUACGAC

>EMBL\_CDS:BAA86516 BAA86516.1 Homo sapiens (human) KIAA1202 protein  
CCUCGACAUCGACUCAGUGCGACCAAUCCCAUGUACAAGACCAGUUAUCCGUUGUCUACCGAGA  
GUAUCCACCGAACCGGACCAACGAGG

>EMBL\_CDS:BAA86597 BAA86597.1 Homo sapiens (human) KIAA1283 protein  
GUCCGUCGUCGGCAGGGGAACCGUGAGUGUUUGUCGGGGCACCCUCCGACCCUAGCGACGAC  
AGAC

>EMBL\_CDS:BAA86525 BAA86525.1 Homo sapiens (human) KIAA1211 protein  
CCGAGUGAACCGAGACCCAGGCCGGAGGGGCGAGCCGCUUCUGUCGUCGAGAUGGUUCAUCCCGA  
CGAGUCAAAACUUUCACCCCUACGACCACCCAGACUGACCACCCGA

>EMBL\_CDS:BAA86603 BAA86603.2 Homo sapiens (human) KIAA1289 protein  
UCGUUCAUUCAGAGGUACUAGAAAAAGUCCACAUCAGAAAAUAUUCUAGACAAAAACUAUCUG  
ACCCAGACAAUAUUGAGAACUAGGGUAAAUAUGUCAGUCUAGAUAACUCGCCAUUGGGACUCCU  
UCAAAAGCCAGUAUAUCCUCUCAAUUUUCGA

>EMBL\_CDS:BAA89212 BAA89212.1 Homo sapiens (human) bromodomain  
adjacent to zinc finger  
UGACGAAAAAGGAAGGGAACUGAUACGUCCUACCCUCUCCGUCUCCGUAUGUCCACAGACUAA  
CGGUCCCCAAGAAGAGGGUGAACAUAGAGUCUAAAUGUCCACUCCUUUUUCCCCA

>EMBL\_CDS:BAA86518 BAA86518.1 Homo sapiens (human) KIAA1204 protein  
AGGAGUUAAGGACCUACUCAGAAGAGAAAGGCCCGACGGGAAACUUUCGUCCUGACCUCAACUG  
AGGAGGUCUCCUCAACCUCCC

>EMBL\_CDS:BAA86595 BAA86595.2 Homo sapiens (human) KIAA1281 protein  
CGCCACCGCCGUCUCCACGACCACGACCAUGAUACGACAAACCCAACGGCGACGGCGGCGACG

>EMBL\_CDS:BAA86489 BAA86489.1 Homo sapiens (human) KIAA1175 protein  
ACGACCCCUCCGUCUCGGGACCCUAGGCAAAAUGACCUGAAGUACCCUCAAAAACUGAAAGAGG  
CCGU

>EMBL\_CDS:BAA86579 BAA86579.1 Homo sapiens (human) KIAA1265 protein  
CAAGAGCGGCACCACCAAUACACGUCGUCGUACCUCUAGUACGAGUACUUAACCAUACAUAUAGGUA  
GUGACACUCUUA

>EMBL\_CDS: BAB83129 BAB83129.1 Homo sapiens (human) BDG-29  
GGACGUCCCCGGGUGACCGUAUGACGAGUAACGUCUUUCCGUUGAAACCACAACCGACACAUG  
UCUCGUCAGGCCCCCAAUAUAACGUCC

>EMBL\_CDS: BAA83004 BAA83004.2 Homo sapiens (human) KIAA1052 protein  
AAGAAAACUCGAAGUCGGAGGUCCGACGACUUCACAAAGACGUCAACGACCGAGACUCGGACGUC  
GUCUAGGUGAACCCUGAGGUCGAAGUCGAACGCCCGGACGUCGAGUAGUUCUU

>EMBL\_CDS: BAA83025 BAA83025.2 Homo sapiens (human) KIAA1073 protein  
UAUCUCUCCUAAUCACUUCAGAAGGUCGACCGACAAAUACAUCUGGUGUCACUGUGUCAGGAAA  
AUCCUUCUAAGAGAAAAGGAGAGACA

>EMBL\_CDS: BAA86539 BAA86539.2 Homo sapiens (human) KIAA1225 protein  
CUGAAAACCGACCAAUUAUCUCCAAAGUUAUUUACCACCAGCGUAGAGGCGGUAAAAGUAGAGAA  
GUAGUCUUCUUUCA

>EMBL\_CDS: BAA86446 BAA86446.2 Homo sapiens (human) KIAA1132 protein  
GACCGCGAGGGCCGAGUGCCACCGCCGACGCAACGACCGCUACGUACAUAUCAACGGCAACACGA  
ACUCCUCUGCGAUC

>EMBL\_CDS: BAA82664 BAA82664.1 Homo sapiens (human) serine/threonine  
phosphatase 1  
AGACAACUACGACCGUGUAAGUACCAAGGGAGACUCUUCUUUUUUAAGAGUCCUAUAAAAUAAA  
ACAUCCGGUCAUUCUCCGUCU

>EMBL\_CDS: BAA83068 BAA83068.2 Homo sapiens (human) KIAA1116 protein  
GAAAAAGAAGUCCGAGACGGACAAUACAACCUCGUAAUUUUUGUAAAGGUCGACCGUCUCGCCUU  
CAUCGUUC

>EMBL\_CDS: BAA92681 BAA92681.1 Homo sapiens (human) KIAA1443 protein  
UACGAGGUGACGGUCCACAGUAGUCCUGAGGAAAUAAGACCACUGAGACACCGUCACCACCG  
UA

>EMBL\_CDS: BAA87415 BAA87415.1 Homo sapiens (human) cadherin-7  
AGUAUCAGGUACCGUUUAAGUCCCGCAUAGUAACUACAGUUCAUUAUCACUACCGGUGUAUCGG  
AGAAGGAUGAACUCUACCUAAGACCGAGAGGUAACGUUCCUGACACU

>EMBL\_CDS: BAA96028 BAA96028.1 Homo sapiens (human) KIAA1504 protein  
ACCUCCACAGUAAAAGGGUGAGAAGGUACCGAGAACAUCCAAUUGACAUCUCAAUUAUAUCUAC  
CCUCUGCGGAGGU

>EMBL\_CDS: BAA96063 BAA96063.1 Homo sapiens (human) KIAA1539 protein  
GCGGGGUACCCUGGCGUCAGACAACCAGGUUUUGUCCGAGAAACCCGGGUCCGUCGUCCACCGA  
GGUCUUCAC

>EMBL\_CDS: BAA96051 BAA96051.1 Homo sapiens (human) KIAA1527 protein  
AGUCUUCUGGUUCUUCGUCUUGCUAUACUCCAGACCUCACUCGUCUUCAUAAAGACCCAGGGUA  
UAAAGACUGAAGGACCUAUGGAAGACC

>EMBL\_CDS: BAA92540 BAA92540.3 Homo sapiens (human) KIAA1302 protein  
AACGCGACCGCGGUGAGGUGGUCCAACUCCGGCAACAGCUACCCGUCGCACUGUAAGGAGAACGG  
GUGCCACCCCAACUGCCACGGUCGGUCGUU

>EMBL\_CDS: BAD74065 BAD74065.1 Homo sapiens (human) histone protein  
CAGGAAGAAGACGCGGAAUCAGUGCCGAAAGAAGCUCGGGAAGAACCCGCGCCUCGCCUG

>EMBL\_CDS: BAA95992 BAA95992.1 Homo sapiens (human) KIAA1468 protein  
CGGAAUAGAAGGUAAUUGUAAACAACGUUGUAACUUCUUGGUUCCUCGAUGCCUAAAGAAAUCC

UUCCAUCCA

>EMBL\_CDS:BAA92641 BAA92641.1 Homo sapiens (human) KIAA1403 protein  
ACGGAGGAGAGGUACCACCACGUCUGGGUCCACCCACCCGUCAGGUGCAGUCCCCGGUCAUCAA  
GAGGGACUUCUGACUUGGCUCGGACGUAGGAGAGGACACAGACGACGGCGGCCUGUCCCCCGU

>EMBL\_CDS:BAA96094 BAA96094.1 Homo sapiens (human) intelectin  
AGACCAUCUACGGUUUGUCUAAUACAGGGUCACAGACCUCUUCGGUCACAGGCACGCCAUGGAG  
UCGUCCCUCGACAAAGAGGUCACGACGUACCCCCUGAAUAACCCGUGCACGGUCU

>EMBL\_CDS:BAA95984 BAA95984.1 Homo sapiens (human) KIAA1460 protein  
CUAAGACCCCUACCAAGGAGGGUCGGACACCCAAGAAGAAGAAAACGACCCCGACCAUUAUCCAGG  
GGGGUCGGUCGGACAUGGUCCUCCAAACGGACAUCGACCACCCUAAGGGGUUCUAG

>EMBL\_CDS:BAA96027 BAA96027.2 Homo sapiens (human) KIAA1503 protein  
CUAGAAGUCCGGGACCGGAGGAAGGUACAAGAAUUAGGUAAAGUCCCGGACCCGGACUCCCAG

>EMBL\_CDS:BAA95996 BAA95996.1 Homo sapiens (human) KIAA1472 protein  
AGGCGGGUACUCCUGGAGCUAACGCACUUCUUCUUCUGGCGAACGAAGGGCGUCAGCUGUAUACC  
UGGAGUCCUCGCCU

>EMBL\_CDS:BAA92624 BAA92624.1 Homo sapiens (human) KIAA1386 protein  
GAGAUCAAAGAAGUAGCUCCCGGUCGGGUCUGAGAACGUCACUAUUGACAUAACGUUCUUAUUAU  
AACCCUAGCAGAAGUAGGUUCCUUGAGUCUC

>EMBL\_CDS:BAA92654 BAA92654.1 Homo sapiens (human) KIAA1416 protein  
GUGAAGGAGAGCUCCGGCGGCAGACGCGGCCAGUCAGAAGUAAUCCCGGAGAACGGAGUAGACAA  
CGGAAAAUAUCGACGCGACUAUCCGUCAUUAUCUGGCCGCGUCUGCACAUCAGUCCCAACUUCAC

>EMBL\_CDS:BAA92671 BAA92671.1 Homo sapiens (human) KIAA1433 protein  
AGCCCGGUCGACGAACCGCCGUCUCAACAGAUACUCCACCCCCUAUUUAGGGACCUACCUCCCG  
AGACAUCCGGUGACCGAACAACCAGGACU

>EMBL\_CDS:BAA92626 BAA92626.1 Homo sapiens (human) KIAA1388 protein  
AAGUGGUCCGGUGACACCCUCGACACCACGACACGGUCACUCCACUCAUCACUCUUCGGGUAGAA  
CGUCUGGGGUGUCUGCUUCCCGAAGACGAGUCGGACGUGCGUGACCACGAGGUCGUCCAGUCACC  
GGACCACCU

>EMBL\_CDS:BAA96031 BAA96031.1 Homo sapiens (human) KIAA1507 protein  
AGUCCUACUUCAUAUAAAACCAACUGAGGAAGUACCUCAUGUCGUUAAACAUAAGGAAGAAU  
GACU

>EMBL\_CDS:BAA92554 BAA92554.1 Homo sapiens (human) KIAA1316 protein  
CUCCCCACCUUCAUUUUUACAUCUACGACGGUGGACUUAUAGUCCCGUCAGUUCAGUCGUCGGU  
CGAGAG

>EMBL\_CDS:BAB16102 BAB16102.1 Homo sapiens (human) hypothetical  
protein  
CGUAUGGUUCUGAACCCGAGAGGUUUCACCUCUAUUAAUACGAUAUCUCCAGGUACAGAAGCCA  
CACG

>EMBL\_CDS:BAB17049 BAB17049.1 Homo sapiens (human)  
interferon-responsive finger  
UCUAGACCUCGUACCUUAUGUCAGAAGUCAAGAACCUCUUGGUAAAAACCGAAAAAGUCGGAGGU  
CUAGA

>EMBL\_CDS:BAA92659 BAA92659.1 Homo sapiens (human) KIAA1421 protein  
CGUCUCCGACUAUAACCGACCUUUUACAUAACUAUUAACCCCAUAUAAAGGUGAACAUUCUUA



AAGUAAAAAGUCGACUAGGUUUUAGACA

>EMBL\_CDS:BAA92636 BAA92636.2 Homo sapiens (human) KIAA1398 protein  
ACGGGACUCAUCACGGUCACCGACCACACAACGGGAACCGUGGGUGACCCCGUGGGUGGUGGUAG  
CCGUGGAGGAACCCUCGU

>EMBL\_CDS:BAA94075 BAA94075.1 Homo sapiens (human) neurexin II  
CCCACCACGACAGGGAGUCACACCCCCUCGCCGGGGCCGCGCACCACCAUCACCGGUACCACCAC  
CAUCAGAGGUACUACCACCACCGGUACAGUCGGUCGUCCACCACCAGGCGACAGAGGCGUGACUC  
GUCGUGCCUGCCGGGGAGGG

>EMBL\_CDS:BAA92662 BAA92662.2 Homo sapiens (human) KIAA1424 protein  
CAAAGAAACAAAAGGAGGAGACAAAGGUAAAAGAAGUAGGAAUAUACUUUUUAAACUUAACGUCUGA  
GACCCCUAUUUGUUUUUUUA

>EMBL\_CDS:BAA92655 BAA92655.2 Homo sapiens (human) KIAA1417 protein  
AAGUCUCAGACUACAGUUGUCAAGACCUUCUCUAAGGUGUCUUAACCAGAAUGGUCUGAAAUUAU  
UAGGACAUCUACUACCUGAGACUU

>EMBL\_CDS:BAA92546 BAA92546.1 Homo sapiens (human) KIAA1308 protein  
GUCGACCGAGACCUCGGACGACCUCGAGGCCUCGACCACGACCUCGAUGAAGAUCGAGACUUGGA  
CCUCGACCACAACCUCGACCGAGACCGAGGCCCCGACCUCGGCCGUGACCCGACCCAC

>EMBL\_CDS:BAA94480 BAA94480.1 Homo sapiens (human) muscarinic  
acetylcholine receptor m3  
GUCGUCGUAGUAACAACAAGGUUGACAGUGACGACGACACCAGAACCAGGUAGACGAGCCUCGAC  
CCAAAGGUCGAGAACCAACACUUGGUCUUCACCGUCGCCGUAUGAAGGAGGACAACCUCGCAA  
GUACGAAACGACAAC

>EMBL\_CDS:BAA92615 BAA92615.1 Homo sapiens (human) KIAA1377 protein  
AGAGAAAACUUACGAGGUCUUCACCUCAGUCAACAGGAGUAUCACGAUCAAAGUCUCCAGAAAAG  
UGUAAAAAAUAGAUAUGUUUGUACCCACCCGAUCUAUGUUUCCCAUGACUUAUAAUACGUCAUA  
AACACCGAGAAAGGUGACAAGGUAAGUUUCCUCU

>EMBL\_CDS:BAB16413 BAB16413.1 Homo sapiens (human) X11L-binding  
protein 51  
ACACGUUCAGUCCGGGGAACCGGUCCAGGAGAAGUGCGUCCCAAGGUCGGCCCCCGGACACUC  
CCGUGU

>EMBL\_CDS:BAA94194 BAA94194.1 Homo sapiens (human) protein kinase  
PAK5  
GACCCAGAGGACCCGACUGGGUGGUCGACGUCCCGGCGGGCUUUGACAAGUACCCUGUGGGACCU  
CCCAGACACCAGCCUCCUCCUCGGGGUC

>EMBL\_CDS:BAB83623 BAB83623.1 Homo sapiens (human) galectin-9  
CGAGACGUGACACACCUACUGACAGACCCAGACCUUCGACUACAUCCUGUCGACGUGUCUCGGUA  
ACUGCCUCUACCACAGGUGGCCACCUUCCCG

>EMBL\_CDS:BAA92556 BAA92556.1 Homo sapiens (human) KIAA1318 protein  
AAACACCGUACCUGUAUGGGUACGGUGUAGGUCUCCGACACCGAGAACCAUCACCGUACCCGUAG  
CUAGGUCUUU

>EMBL\_CDS:BAA96025 BAA96025.1 Homo sapiens (human) KIAA1501 protein  
CAUCCGACCUGUGGUGACGUAACAACGGCCCGUGAGCCAUUUACGGACACCUGAGGUCGGGAG

>EMBL\_CDS:BAA92595 BAA92595.1 Homo sapiens (human) KIAA1357 protein  
ACAGUGACGACCACGACGAGAAAGCCUACGAAGAGACUUAGCUGGGGUGAACGAAACCUCUCCGG

UCCGAACCCCGUCGCGGCCACCCACAGU

>EMBL\_CDS:BAA96021 BAA96021.1 Homo sapiens (human) KIAA1497 protein  
AACUUCAGGGGAAGAACCUGAAAAACACUACCCCAAAAAACAACUCCAGAUUCUUAAGUUUAAACC  
UUGAAAAACGUCCCGUUAACUCCUGAAAUU

>EMBL\_CDS:BAA96024 BAA96024.2 Homo sapiens (human) KIAA1500 protein  
GUUACUGACCUCACCUGAAAAGUCGUCCUCACUAGUACUACCAUJUUAUAGACUAAUAGGUUAC  
AACACCAGGUACAGUCUCUGUCUCUUUAUCUUCGAUAGUCAUUGGUCUACUGGUAGUCAAGUUU  
GUGUCGACUCAUAGACUAAAAGAACAUAAC

>EMBL\_CDS:BAB13394 BAB13394.1 Homo sapiens (human) KIAA1568 protein  
CACUGUGACAAGAAUCAUUGUAGUCACUGGACGCCAAACCUACCACCGGGACCGUCCAGUGAAUU  
UAGUAUCAAAAUGACUAAACAACGAGGUCUGAGACAGU

>EMBL\_CDS:BAB13428 BAB13428.1 Homo sapiens (human) KIAA1602 protein  
CGACGGUCCUAGGGGUCAGCGGCAGGACUGGGGACCGACCCGAAGAACCUACUCAACGGACCCC  
AGGACGCCG

>EMBL\_CDS:BAB13433 BAB13433.1 Homo sapiens (human) KIAA1607 protein  
CCCACUUCGUCCUCUACAACCGUUCUCUUCGCCGUCGUCGUCGAAGACGUGAACCGACUCCGAGA  
AACGGCAGAGACUUGUAGCGACGUAGUGGA

>EMBL\_CDS:BAB13456 BAB13456.1 Homo sapiens (human) KIAA1630 protein  
UCAGAAAGAGUAGGACCGAGACUUAACCCUCCAAAGUUAUCUUUAGACGGGUGUCAUCUAAACU  
AACUCUAUCUGA

>EMBL\_CDS:BAB13396 BAB13396.1 Homo sapiens (human) KIAA1570 protein  
AGAAAAACCAUACAGAGUUAGUUCGGAAAAGGAGUCAAGAUACAUAUUCUCAGACUUCUUA  
CUAGAGUAGUCCUAUAUGUCCUUCU

>EMBL\_CDS:BAB62077 BAB62077.1 Homo sapiens (human) affixin  
CGUGCAGUAAUUAGGUCAGCUCUCCUGGAACUGGUCAAGGAACUUGAACCCAGGAAGGAACCU  
CACCCAGUUAGUAGCACG

>EMBL\_CDS:BAB13460 BAB13460.1 Homo sapiens (human) KIAA1634 protein  
AGUCCGCCUUCUAGGUAAAGACACAACUUUACUUCGGACUCUCGACAGCAGGAGCCCAACAAA  
AGAGGUUAUCUUCUAGAAGGCAGACU

>EMBL\_CDS:BAE71373 BAE71373.1 Homo sapiens (human) zinc finger  
protein  
CGACGACGACGACAUCGACGGACCCCGGCGUGGUCCCGGAGGAAGGUCCCGAGGUCCGGUCCGA  
GACCCGACUUCGACGUUGACCCCGGGGUCUUCUUCUCCCGACCACCUUGUCCGAACAUCUCCGU  
CGCCGUCG

>EMBL\_CDS:BAB13392 BAB13392.1 Homo sapiens (human) KIAA1566 protein  
AGUCGACACCUGAGGGCACAGUCUCCUUACCCUAGUCCUCGUUAACGACUAGAGUAGAGAAGACA  
AAGGUGAGGACAGACGUCUACU

>EMBL\_CDS:BAB13399 BAB13399.1 Homo sapiens (human) KIAA1573 protein  
GGUGAAAGGUCGGAGACUGACGUGGACGACAACUGUGUACCACUUCUCGUAGAACGUCCGGUCC  
CAGUUAUCGACACAUAACAGUGGCCGAGGACCACC

>EMBL\_CDS:BAB13458 BAB13458.1 Homo sapiens (human) KIAA1632 protein  
CCAGAGGAAACUUAAGUGUCCGAUCUCUUCUCCUAAAGGACGAGAGACCUCCAAAAACCUCCUC  
UGA

>EMBL\_CDS:BAB39742 BAB39742.2 Homo sapiens (human) mosaic serine

protease

CCUCUACGGGCCGGACCUCCACAGGGUCGACCUCUACGGACCCGACCUCUACGAGGUCGACUUCC  
ACAAGAACGACCUCUACGUAAGGGCACCAGGGAGAGG

>EMBL\_CDS: BAB17658 BAB17658.1 Homo sapiens (human) gamma2-COP  
CUAAAGUCUGUGUUUUCUUCUAUAGACGAAGUACUCGGCCAGGUGUGACGAGAGUGAAGGACAAA  
ACUCCUCACAUCAUUACCGAUUCCAUCGUUACGAAGACAAACUCAGACACUAA

>EMBL\_CDS: BAB39854 BAB39854.1 Homo sapiens (human) VUS20631  
GACUGUGGACACGUCCGACCCGUCGAGGAGUUAACUAACACUCUGUCAAGGUCCUGAGCCUCGG  
ACCCGUCGACAACCGUGUAGGGGCUACCCUCGUCGGCCUACGGACGCGCCAGUCCAGUC

>EMBL\_CDS: BAB59010 BAB59010.1 Homo sapiens (human) calmin  
CCUUUGGAAACUCUCCCCACCCUCCCGAACUUUAGGUCCGGAAGAAGCGACACUGAGGGUUC  
AGAGG

>EMBL\_CDS: BAA99542 BAA99542.1 Homo sapiens (human)  
3alpha-hydroxysteroid dehydrogenase

CUCGUGACACCCGUUGGUCUUGUUACAGAAAACUGAACGUCUUUAGGUCGUCAAACGAGACCAAC  
UCCAUCCUACUGUAAGAUGGACCAACGUCUGUCCGAA

>EMBL\_CDS: BAB13377 BAB13377.1 Homo sapiens (human) KIAA1551 protein  
ACGGACCCAGUAGAGUUGUCGACUACAGAAACUUCACUCUUGAAAGUGUAGUACUCUACCCAGAC  
CGU

>EMBL\_CDS: BAB13442 BAB13442.1 Homo sapiens (human) KIAA1616 protein  
AGACCAAGAAGACGGAGGAAGAGAACCUCACCUAAGGACCCGGACUCUGUAUAUCCCGUACAG  
CAGAAACAAGAACUUGAGGUUCGACUCUUAACUUCUCCUUCUUAAGGGUCU

>EMBL\_CDS: BAB39380 BAB39380.1 Homo sapiens (human) MAP/microtubule  
affinity-regulating  
CGACACUGACCUCUCCCCUCCGUCUCCCCGUGGGCACCCACGGACUCGACAAAAGAAAGGGUAAAC  
CGUUGUCA

>EMBL\_CDS: BAD74069 BAD74069.1 Homo sapiens (human) hypothetical  
protein  
CCGAGGAAGAGGUUCAGGGUCCUCAGAUCGAGCAGGAGGACCCCGAACCCCGUUCCUACGG

>EMBL\_CDS: BAB86289 BAB86289.1 Homo sapiens (human) CasL interacting  
molecule MICAL

AGCGACGGAAGGAAAAACACCAGACAGACCCCGUCCACGACCUCCGUCAUCUUUACAGGUAGAGG  
ACCCACGACGAGUAUCGGUGGACCCGGUGUCACACCCGAGUGUCCAUACCGUCGCC

>EMBL\_CDS: BAB87181 BAB87181.1 Homo sapiens (human) psi neuronal  
apoptosis inhibitory  
UCACCAAAAAACUUAGUCAAAAAGGAUACUGAACUCCUAACUUGUAUAAAGAAACAUCAGUAGA  
UUUUCUUAUUCUGGACUAAGAAAUUGACGA

>EMBL\_CDS: BAB13469 BAB13469.1 Homo sapiens (human) KIAA1643 protein  
AGUGACCGUAUCAAGCAGACGUCGACCAGUCGGUGUGGACUUUACGUCUGCUUGUCCGCCACC

>EMBL\_CDS: BAB19259 BAB19259.1 Homo sapiens (human) toll-like receptor  
9

CACGUAACGGCGACUUCAGGUCCCGGGCGUCGUGCAUGACGUCUCGACGACCCUGUGAACCGAC  
ACCUACAACAACCCCGUCCGACUCCACCGUCCACGCG

>EMBL\_CDS: BAB21774 BAB21774.1 Homo sapiens (human) KIAA1683 protein

GUAGAGUCAUCCGACUCUACUCAUCAGACCCGAACCCUGUGAAGUCACCGGUGUCUAUCCAUCG  
GACUCGAACCCUGUGGAGUCACUCGACUCUACCCAUCGGACCCGAACCCUGUGGAGUCACCGG  
UGUCUAUCCAUCGGACUCGAACCCUAUAGAGUCACCCGACUAUAC

>EMBL\_CDS: BAB60824 BAB60824.1 Homo sapiens (human) Gi-coupled ADP  
receptor HORK3  
AGUGUAAGAACAGAGAGCCGACGGACAACCAGUCUUAGUACAAUCCGUUUCUCUCAUUCUUGUAC  
U

>EMBL\_CDS: BAB21853 BAB21853.1 Homo sapiens (human) KIAA1762 protein  
UUCUCUCCCCGACCCUUAGCCACGUCCAGGUUCCUCCACCCCUCCCCUGUCCUUCCGUUAGG  
UCUAUACUUCGGUGACCACAGUCCCGGGAAGAAGAGUCACGGGUGGAGGGGAGACAGAGCGGAA  
GGAACCCGAGAAGAACCGACGCAAGACCGGAAGUUAGAA

>EMBL\_CDS: BAB21813 BAB21813.2 Homo sapiens (human) KIAA1722 protein  
UCGAAAAACCGAAAAUACGUCGAAUCCACCAGAUAAAGUAGAUCUAAUCCAUAUUCUCGAAGUUU  
UCGA

>EMBL\_CDS: BAB21776 BAB21776.2 Homo sapiens (human) KIAA1685 protein  
ACCAGGGAGGUUGACUCCGCCGACGUCGUCGACGCCGCCGUCGCCGUCGACGACGGGAGACACGA  
AACUGGU

>EMBL\_CDS: BAB21777 BAB21777.2 Homo sapiens (human) KIAA1686 protein  
UCCUUUCACCCUUGGAAAUGUUGACUCAAAGAUAGAGACUUGUCCAAGACUAAAAAGA

>EMBL\_CDS: BAC15606 BAC15606.1 Homo sapiens (human) FELE-1  
ACCACAUCCGUCACCGUCGGAGUJAGACCCCGUGGUUGGGUACCACGACGUCGUUAAGGGCCUUC  
UCCGACUUCGGUCCGUGGU

>EMBL\_CDS: BAB21802 BAB21802.1 Homo sapiens (human) KIAA1711 protein  
ACAAGACUUUAUGUACAUAUAAACGUAAGUCUCCGAAAUCUUCGACCUAAAACAUUAAAACACACC  
UUCUCGU

>EMBL\_CDS: BAB47408 BAB47408.2 Homo sapiens (human) fibrillin3  
CGGUGGUGACUGUUACGUGAGCAGGUGUAGGUGCGUACGGACGGACCACCCGCACCCGACCUUCG  
GGCCCAUCGUGGCCGUCACCAUCCACGGCCCCUACAACUGCGUCAGUGGCACCACCG

>EMBL\_CDS: BAB40803 BAB40803.1 Homo sapiens (human) epiplakin 1  
CCCGGACGGCUCACGACAUGAACUACUUACCCCCAGGGACCCGAGGGGAGGGGCCCCAGGGGGGA  
CUCUCACCGUCCUUCGUUCGGG

>EMBL\_CDS: BAB21818 BAB21818.1 Homo sapiens (human) KIAA1727 protein  
CCCGCGCCGUCAGAAUAAAAGGAGUCCGAAGACAGACCCCUCCAAGGACUACCAAACCGUGAC  
CCGAAGAACUUUCUUGGGACCCGACGUCCCCUUGCAGGGAGGGGCCUGCCCACGACGACCUCGG  
CGACGAGGG

>EMBL\_CDS: BAD93351 BAD93351.1 Homo sapiens (human) BNIP2 motif  
containing molecule at  
GGAAGGAGAAAUCGUUUACCGAACACAAGUCAAAAGGAAAAGCAGAGGUCGUUUACAACCACUACA  
CAUUCUCAGACUCCACCUUAUUAACCAUAGAUUCCCCUUC

>EMBL\_CDS: BAB33339 BAB33339.1 Homo sapiens (human) KIAA1669 protein  
GGACACCGGACCUCCCGACUCACGACCGACGACGCCACGGAGGGUCCUCGACUCCCCCGUCC  
AGGUUCAAUUACCAGACGUCGCGGUGGAGGUCCUCUCCUGGUACGGUCAGACGUGCCUGCCGAG  
UCGGGGACCCGGGUGUCC

>EMBL\_CDS: BAB20900 BAB20900.1 Homo sapiens (human) KF-1 protein

GUCCUCAAGAUUCAUACAUAACUACCGUAUAAUAUAUACGGUUAUAGACAGUAUAUUGAGAAC  
>EMBL\_CDS: BAB39359 BAB39359.1 Homo sapiens (human) HsRml  
CCUUCGGGGGCCAUAGUGUUUACCGACCUUAGGGGGAGACGAGAGGCCUCGACCAGAGACCGGG  
ACCCCGCCCCACCUCAAAAAUJAGACCUAGGACCCCGAAGA  
>EMBL\_CDS: BAB69021 BAB69021.1 Homo sapiens (human) hypothetical  
protein  
AUACUUGUCUUAAGACGAACUCCUUCGACGCACUUAUGUACAAGAAAGGAAUCAAGAAUUCG  
UCAUAUAGACAUUCAU  
>EMBL\_CDS: BAB21780 BAB21780.3 Homo sapiens (human) KIAA1689 protein  
GUACUCAGACACUUCUUUAGAACUUUACUGACUUCACUGAACUAUGAAGAAAAGUCUUAAGAA  
AAAAGAAGAUGUCCACAUAC  
>EMBL\_CDS: BAB59128 BAB59128.1 Homo sapiens (human) chorein  
UAACACAACAUUACUGAUUUCGUCCUCGUAGUAAAAACAGUACAGUCGAUGUUUGUGUUA  
>EMBL\_CDS: BAB21863 BAB21863.1 Homo sapiens (human) KIAA1772 protein  
AUGUCAAGGGGACGUCCUACCCGACCCAACAUUUUAAGGUCAAUCACCCAGACACCUUGAC  
CCCGUCUAUUUCCCGAGGCAAGAACUUUCUCCCGCUUGACAU  
>EMBL\_CDS: BAB21770 BAB21770.1 Homo sapiens (human) KIAA1679 protein  
GACAUAGCUCUGACAAAUGACACCGUAAAGGACGAACCGUGUAGGAACCCGUGCCACAGGUGAG  
UGACUUUCGUCAGUGUUAUGUC  
>EMBL\_CDS: BAB21846 BAB21846.1 Homo sapiens (human) KIAA1755 protein  
CGUCUUCGAAGACCGUUCGUCGGAAAAGGAGUCAGUCACCCGACCCCGUCACCGACCCGGUCU  
ACAAAACCA  
>EMBL\_CDS: BAB32867 BAB32867.1 Homo sapiens (human) NeshBP  
AGACUAAACAGUAAACUUACCUGAACAAAGAAGGGUGACUACUGGGUAAAAGAGACCUAUUAUGA  
AGUAUAAGUCACUGUCACAGUAAAUCACCGAAAAGGGUCAGGUUCUACUGUUUACUCC  
>EMBL\_CDS: BAB21816 BAB21816.1 Homo sapiens (human) KIAA1725 protein  
ACUGGUCAAGACUUUAACGGAAACUGACAAGGAGUAGGUAAUUCUAAGAAGACUACGUACCCCU  
CAUAAUGAGUUUCUGACGAAGAGACCAGU  
>EMBL\_CDS: BAB21827 BAB21827.1 Homo sapiens (human) KIAA1736 protein  
CGCCUGAUCGUCUCGACGAGUUGAGGUCGGACGACCUUGACCCGCAAACCGGGAGUCAGGCG  
>EMBL\_CDS: BAB21833 BAB21833.2 Homo sapiens (human) KIAA1742 protein  
UCGCCAACCUUCGUGUCGGUCUAUCAACGGGUCCUGGUCGACCCGUCGUGACCAACCGACGA  
CAGGCGA  
>EMBL\_CDS: BAB33332 BAB33332.2 Homo sapiens (human) KIAA1662 protein  
UCGGGUGUCGUCACCCACAGGGUCUCACGGUCCUAACACUCCUGAGACGCCCCGGAGGGGUCAAG  
AGUCCCCCGAGCACUCACCCGAAGAGAAAGGAUCAAGAGACCCUCGAGUACUCACCCGA  
>EMBL\_CDS: BAB21848 BAB21848.1 Homo sapiens (human) KIAA1757 protein  
CAUUGUAAACUUUGUCUACAGAUUGAAGUCUAAAGUCCCGAAGUCAAAAACAGAGAAGUGGUUG  
UCCUCAGAGACUCCACCAACAUCAUJAGAGAUGUAGUCUCAACG  
>EMBL\_CDS: BAB21861 BAB21861.1 Homo sapiens (human) KIAA1770 protein  
CUCCUCCACAUCUACCUUCGAGUCGGUCCUUGACGACGAAAAAGAGUCGAAGGAAAAGA  
AGAUAAGAAGAG  
>EMBL\_CDS: BAB21850 BAB21850.1 Homo sapiens (human) KIAA1759 protein  
GGCCUCCGGUCAGACGAGUCGGUUAAGUAGGAGAGGUACUCCGUCGACCCGUCUCCGACCGUCG

GUCUCC

>EMBL\_CDS:BAC05722 BAC05722.1 Homo sapiens (human) seven transmembrane helix receptor

CAUCUACUACCCCAAGUAACCCACUAGUGAAGUAUUCUGUJAGGUUACUAAAGUAGUCUACG

>EMBL\_CDS:BAB91223 BAB91223.1 Homo sapiens (human) aquaporin 10  
CGACCAUUCACCGACACGGUUGCCACCGGGGGUGGUCUCCCCGGUGGUGUCCGUGGGUGGUGGUC  
GGUAAUGGUCG

>EMBL\_CDS:BAB84316 BAB84316.1 Homo sapiens (human) RIN3  
CUCGAGACCCUACCCGUCACCGGACCCGUCCUCCCACGACUCAGGGUCGGACUCUUCGUCCCCGA  
AACCGGGAGAGACCCACCUUGGGCCGCACCCACAGAGGUUCCGGUAGCGGACACACGUCUCGAG

>EMBL\_CDS:BAB40969 BAB40969.1 Homo sapiens (human)  
kringle-containing transmembrane

GGUCGGGGGUACCCACCGCGGGUCCUUAACGAUGGACCCUGUCAGACUCCACCCACCGACC

>EMBL\_CDS:BAB67831 BAB67831.2 Homo sapiens (human) KIAA1938 protein  
CGGGGGCGUCAUGGUGUCCGACUCCGGCCCCGGCGAGUGAGACCGCCGAACCGACGGAAACCUAC  
AACCCCA

>EMBL\_CDS:BAB47435 BAB47435.1 Homo sapiens (human) KIAA1806 protein  
CGGGCGUAAGGACCGUACGUAUCCCGAAGAACGGUGACACUCAGGAACGUACAAAGGACUCCCUA  
CUCCCCG

>EMBL\_CDS:BAB67802 BAB67802.2 Homo sapiens (human) KIAA1909 protein  
AGUACGAAACCCCGAGACCCGUUCCCCGCCAUUCGACCCAGACCCGUCGGAGUCUJCCCCG  
GAGAAGGUCUGCCUCGGCCCAGACCCCAUGACGUCGGUGUCCAGAACGACACUACGGGUGCCAA  
AGGGGUCCCCGUACU

>EMBL\_CDS:BAB69067 BAB69067.1 Homo sapiens (human) signal recognition  
particle 14kD

AGUCGGGUAGGUACAAUCGAGAUUCCUCCAAACUUAUUCGGUAGACUUUGAAUAAGUGAAGGAAC  
CUCGAGUGGUGUCACGACU

>EMBL\_CDS:BAB47462 BAB47462.1 Homo sapiens (human) KIAA1833 protein  
CAGGGGAUCCAUCCCCGACCUUCUGUGUJGGUUGUCAGAAGGCCAAUGUCGUAUCCUCUG

>EMBL\_CDS:BAC01892 BAC01892.1 Homo sapiens (human) immunoglobulin  
heavy chain VHDJ

CGGAAGGGACCCCGACUGCCUAGGUCGAGUGUCUGUAAGGUGAUGACGACUCACUCUUGGGUCC  
CUUCCA

>EMBL\_CDS:BAB47465 BAB47465.1 Homo sapiens (human) KIAA1836 protein  
ACGGGACCACGUACUUGACGAACCUCUUGUCGUCCGUGAAGAGAACAACGAGGUCUUCGUAAAAA  
ACGUCCGACCCGU

>EMBL\_CDS:BAB93492 BAB93492.1 Homo sapiens (human) annexin A7  
ACGAGGUGGACCACCCUGAGGUUJAGGAACCGGACCUCUUGAGGCCCUAUCCUACCUCGAGGGG  
GACCGACACCCCGU

>EMBL\_CDS:BAB47436 BAB47436.1 Homo sapiens (human) KIAA1807 protein  
GAUACACUCGACACGAAACCCGUUAUCCUGAACUUGAACUGAAGUAGUAAGAGACGAUUCUACCA  
GAAGUAGAGGUCCGGGGCCAGUUUCGUGUCCAGUGUACC

>EMBL\_CDS:BAC05726 BAC05726.1 Homo sapiens (human) seven  
transmembrane helix receptor

---

GAGAGGUGGUAGGUCCCCAGAAGAGGAACGAGAUUGACCCUCUACUGGAAACCGAACCUUUUCUC  
>EMBL\_CDS:BAC06143 BAC06143.1 Homo sapiens (human) seven  
transmembrane helix receptor  
CACGAAAAACAAAAGGGGGUCUACUCCUGUAGAAGGAAUACCUACUUCGUUAAGCACUUAUUCUC  
UUUUACUAGGGUUCUCCCCUUUUUGCGGGUCGUG  
>EMBL\_CDS:BAC05799 BAC05799.1 Homo sapiens (human) seven  
transmembrane helix receptor  
ACACAACGGAACUCUCCUUUAACGAGUCGUAGAAACCUUACUACUGUCUUCACUCGUCAUAGAGA  
UCCGUCCUGU  
>EMBL\_CDS:BAB93508 BAB93508.1 Homo sapiens (human) OK/SW-CL.108  
CAACGACAAGGACUUCUGUUCGAUCUAGGUAGUAUACAGAUUAAACACGAAAGUUUAGAAACAAG  
ACCUCCACGUUUACCACUGUUACUUCUAGAAAGAACUCAAGGAAACCUUAUACUG  
>EMBL\_CDS:BAC05849 BAC05849.1 Homo sapiens (human) seven  
transmembrane helix receptor  
CUUCUCGACCCUGUACGUCGGACGUAUACUUUACCAUAAAAGACUACAAUCGUACCAGGGGUCGU  
AGAAG  
>EMBL\_CDS:BAB47448 BAB47448.1 Homo sapiens (human) KIAA1819 protein  
UCGCCCGCCGACGACGAGAGGCCAAUAGGGUGGUGACGGUGGUAUUAACGAUGACAAGUCGUCCA  
CGACGACCACCACUACCACUAUCAGACCACCCCGCCACCCCGACGACAACGACGA  
>EMBL\_CDS:BAB47484 BAB47484.1 Homo sapiens (human) KIAA1855 protein  
CGAGAAGCGGGAGGAGCCCGUCACCGGCGUCGAGGAGCCCGAGGAGUAGGCACCACGGGCUACAC  
GACCCGAGUCGGGGACCUCCUUCAGGAACUCG  
>EMBL\_CDS:BAB47478 BAB47478.1 Homo sapiens (human) KIAA1849 protein  
ACCCACACCGGUCGUCCAACUCCACGUCCUCUCGAAGACCUUCUUCACGAGAGGUCGCGGGGC  
UUCGGCCGCGAGGCGUAGGU  
>EMBL\_CDS:BAC01580 BAC01580.1 Homo sapiens (human) immunoglobulin  
kappa light chain  
UUAACCUACGUCGUUAUCUAGUCGUCAAUCCCGAAAGGGACCAAACACAACUAUGGUUAA  
>EMBL\_CDS:BAB68399 BAB68399.1 Homo sapiens (human) WNU7B  
CGGCGUCUGCCGACCGGGCGUGGUGGAGGUGGACGUGCCGGCGCAACAUGAAGAGGAAGUCGUCC  
ACCGGGUGGAGAGCCUUGAACCCGUCGCACCAGGUCGUCCAAAACCACCACGUCCUCGGUCUGUG  
CGGCACCG  
>EMBL\_CDS:BAB47466 BAB47466.1 Homo sapiens (human) KIAA1837 protein  
GGGUCCUCCUGGGGUUAGACCGCCUACUUGUAGGGGAAGUCGGAGAGUCAUUCGACUGACUGCAA  
CUAUAGGUUCUACUAGAGGUGGUCCAACAAAAGGACCC  
>EMBL\_CDS:BAC05715 BAC05715.1 Homo sapiens (human) seven  
transmembrane helix receptor  
CCACACCUCCACCCUCAGUCUCGACUGUCGGCCUACGACUCGUCCAAGGAGUCGUGACACUGGU  
CUAUGUACCUGUCCUGUCCUGUCGUUUCGCUCCUGGCCGACGUCAAGACCUAGGAGGCGCGA  
>EMBL\_CDS:BAB47446 BAB47446.1 Homo sapiens (human) KIAA1817 protein  
CGUCGACCCCGAGACGUCUCGGUACCCCAUCAUCGAGCCCCUUGGUCCGACCAGAGAAGCUCGA  
ACGAAGAAAACCCACACGAGAGGUCGACG  
>EMBL\_CDS:BAC05977 BAC05977.1 Homo sapiens (human) seven  
transmembrane helix receptor

CCUGGUGUUAUGUCACCCUCCGUGUCCAGACUUUCCGAGACGCGGAGGGUAGACUCCACGCCUAG  
G

>EMBL\_CDS:BAC01621 BAC01621.1 Homo sapiens (human) immunoglobulin  
lambda light chain

ACUGAAACCCCCGAAACGGACCCUCGACAACCAUGGUCCUCUGUAUCCAUAUUAUGGUUCCAGU

>EMBL\_CDS:BAB67799 BAB67799.1 Homo sapiens (human) KIAA1906 protein

GGGGGAACUCCAGUGACACUCCAGUGAUCCUAAUAACCCAGGCCACUGAAGGGAACUCACCCC

>EMBL\_CDS:BAB79459 BAB79459.1 Homo sapiens (human) ribosomal protein  
L8

CGGUGGUGUGGUUGGUGUCGAGACAACCGACUCCUCUAUUGGAAGAACCUCGGCCUCCCGUCGAA  
GUGUGCCAGAAGAACCAGAGUCCCAACACCCUCUAUUGCCACCG

>EMBL\_CDS:BAE45748 BAE45748.1 Homo sapiens (human) putative protein  
product of

AGUCUCCGACUUAGUUUUUGUAGAGGGAAUUUAUUAACGAAUUCAGUCCCUACAAACUAAAGAA  
GAGACU

>EMBL\_CDS:BAD90695 BAD90695.1 Homo sapiens (human) CXADR like 1

ACGGGGGAUACAGACCUUCCAACAACUGGUCCGUGACCAUCCACGGUCACAGACUAUUGACUCAC  
AAUAAUUAUCUUAUCUCUGUAACCAUCGACCGUACCACGGACAUUUAGGAUGGGGAUGGCACCUU  
GGCCCCCGU

>EMBL\_CDS:BAB85546 BAB85546.1 Homo sapiens (human) KIAA1960 protein

GGACCGGUCAAGAAACCGGAUUCGGUCAAGGUAUGCCGACCAGUCUCCGUACCUGUGACCGACCC

>EMBL\_CDS:BAB85570 BAB85570.1 Homo sapiens (human) KIAA1984 protein

ACCCGAGUGUCUACGGUUCGGGAGCCCAACCCACCACCCUUUGGACGGGUGGCCUACGACCCAC  
UGACCUCGGGU

>EMBL\_CDS:BAE45754 BAE45754.1 Homo sapiens (human) putative protein  
product of Nbla00360

CGAAUCGAGUCCUGACCGACCAAGUCCUCACCUCUGGAGACAGAUCCGCACCAGAAGUGACGGA  
CGUAGUACCACGACAAAGCUCCAUUCG

>EMBL\_CDS:BAE45758 BAE45758.1 Homo sapiens (human) putative protein  
product of

UCUCCUCGUCCCCCGGCUACAACUACCCGUUUCUUCGGAAGUUUCUAGUGUUUCAACAAGUGGA  
CACCCUGACACCAGAGGUCUACAUCACGAAUAAGUCCUAAAAGUCGUCGAAGACACUCCAGCC  
AGUUAACGGUCAACCACGCCAAGGUGAGCGAGGAAGA

>EMBL\_CDS:BAB91138 BAB91138.1 Homo sapiens (human) CLCP1

ACGAGGUGGUACCACCUAGGUCACCAUAUUACGGACAAUAAAAGAAAAGAAUUAAGUUUAGAU  
AACAUJGGUGACCAUAAGUAGUCACCGUUUUCGU

>EMBL\_CDS:BAB85535 BAB85535.1 Homo sapiens (human) KIAA1949 protein

CAACCCCGACCCCAACCCUCUGUCUCCCGACCACCACCCCGACCUCGAGGUGACGAAGGAG  
AAGGACGACAGAGUCCGGAGGUCAGGGUCG

>EMBL\_CDS:BAB85544 BAB85544.1 Homo sapiens (human) KIAA1958 protein

GGAAUGAGUCGUGGGUGUCGAAGAGGAACUCAAGAACCACCUCCUCGACUCCACGACACCAC  
UACC

>EMBL\_CDS:BAB85554 BAB85554.1 Homo sapiens (human) KIAA1968 protein

CCGGGAGACCGUCCAAAGACGGUCCCGUCACCCGACCCCGUAGCCAGAGAGGAAGGGUCCAU



---

CUUAGUCCGACAGUGAUCCCACCAGCUCCGAGUGACAGGGUGACGAGGUCCUGGAACGGCCCGA  
>EMBL\_CDS:BAD38642 BAD38642.1 Homo sapiens (human) putative protein  
product of  
UCCUUACAAGACGGUAGAACCCUUCUGGUGACCAGGGUGAUCACUUCAUCUACCGUCUACGAAGG  
A  
>EMBL\_CDS:BAE45765 BAE45765.1 Homo sapiens (human) putative protein  
product of Nbla10317  
CUCGAACUACAACAGCCGCGGUCGACAGGUCGAGUGAGACGUCCCGACCUCACACGACCC  
GGUCCGCCAAGAGCCGGAGUUCGAG  
>EMBL\_CDS:BAE45713 BAE45713.1 Homo sapiens (human) nestin  
AGAAGACCUCAGGUGUCACCACGAACUCAAGACCUCUAAAAGUCACAAAGGUCCAAGAGAACAGG  
GCGUCUGAAGUCACU  
>EMBL\_CDS:BAC02434 BAC02434.1 Homo sapiens (human) p53-inducible RING  
finger protein  
CACUACCCUCUGGGUGUAGGAAGAGCCUAACGGUCGACGUACAUGACAAAGUCCGUUCGACACGU  
UUUCUACGUGACCGUAAGGACCUCACACCAGUAGAACAGG  
>EMBL\_CDS:BAD38647 BAD38647.1 Homo sapiens (human) peptidoglycan  
recognition protein L  
GGUCCAAAGGUCGGUCCACUGACGGUCCUCCGACAGGUGGUACCAGCCACCCUGAACCGAAAC  
CGUAGACCGUUCUUCGAACC  
>EMBL\_CDS:BAE45716 BAE45716.1 Homo sapiens (human) putative protein  
product of  
CGAGAGACAUCUGCCCCGACCGACGACCCAGGGACUUCGAGUCACCGACCGCGUAGGGUCCGUC  
CCCCA  
>EMBL\_CDS:BAB86816 BAB86816.1 Homo sapiens (human) Sialic  
acid-binding Ig-like lectin  
CCUGGCCUCCUACACGGCAAGGGUCUCAAAGGUCCUGACAGGACAAAGGAACCCUUUGGUAG  
UGAGAGUCCAAG  
>EMBL\_CDS:BAB88873 BAB88873.1 Homo sapiens (human) SU7L isoform 3  
CUCCUAAUUUAAGGUGUCGAGAUACUUAACGAAGGUGCCGUAAUUAAAGACGACACGAAUUAGGA  
G  
>EMBL\_CDS:BAD06454 BAD06454.1 Homo sapiens (human) Grb2-associated  
binder 2-like protein  
GCCUCCUUCGGAGUAAUAGGCGGAGUCUCGGACACUCCGACGGAGACCACACCGGUACCCUCCGG  
UCCGAGGUCCCCUAAGACACCCACGACGGAGAC  
>EMBL\_CDS:BAB91442 BAB91442.1 Homo sapiens (human) KIAA0781 protein  
CUACCUACCGAGUAAAAGAACGAGAACCUAUCUCUUGUCCAGAGACCUGUCCUUGAAGAUACU  
CGUAGGUAA  
>EMBL\_CDS:BAC16233 BAC16233.1 Homo sapiens (human) L-SOX5 transcript  
B  
AACGUCGAUCGACCCGUCGUAAUUGACGACGUCAACCUCACCCGGAUUCGGACCACAACGACGC  
CGUCGUCGACGGUACCAUCAACCCU  
>EMBL\_CDS:BAC67014 BAC67014.1 Homo sapiens (human) Formactin2  
CGAAGGCCAAGACGGAGACUAAGCCCAAGUCCUAGGGCCGUGAACGAACCCCUACCACUCCCCA

AGGACCCCUCCUCCGUCUGUGGCACUCUCG

>EMBL\_CDS:BAC01115 BAC01115.1 Homo sapiens (human) Di-Ras1  
GACGGCCACCACAGACACUAGACGUCGACGUGUGCGAGAACAGCGUCGACUAGUGGACGGCCAU  
C

>EMBL\_CDS:BAE96598 BAE96598.1 Homo sapiens (human) zinc-finger  
homeodomain protein 4  
CCAGUGACUAUAUUCACUGUCGAGAGGACGUCAUUCUCCUGUCCAGUAGUGGGUAAUCGACU  
GG

>EMBL\_CDS:BAC02703 BAC02703.1 Homo sapiens (human) KIAA1994 protein  
CAACCACGUUGACCACACUAUGACAGUCUCGAAGGUCAACAUCUCUCAAAGAUCUAUGACCCGA  
ACUCCACCAGGGUGGUCAUUAACCUACGUGACCG

>EMBL\_CDS:BAC02711 BAC02711.1 Homo sapiens (human) KIAA2002 protein  
CGGACUCUCUUAACGAGUGAUUUCGGAUACCCUAUUCUACUCCACCCCGACCCGAGACGUCC  
GGGUUUCGGAACCCGUCAGGGGGGUCGACCAUACCCUGUUAUCGUCCAAGAGAUCCG

>EMBL\_CDS:BAD00088 BAD00088.1 Homo sapiens (human) chimeric MOZ-ASXH2  
fusion protein  
AUCCUGGACGAAACUCGAGUUGACACGGUAGUCGACGUGUACUUGUCCACUCCGUGGACUCUAA  
UCUCGUCCUGGAC

>EMBL\_CDS:BAC67158 BAC67158.1 Homo sapiens (human) cytosolic  
phospholipase A2 delta  
CCCCUCUUGAGUUGGGUGAGGAACUUCAGGUCACAGAGGUCUAACAAGAGAAACUGUAACUCCG  
AGUUCAUCUCCCCGUCUCCCAAGACUGGGG

>EMBL\_CDS:BAC76999 BAC76999.1 Homo sapiens (human) homeobox  
transcription factor Nanog  
CCACCAUCCUUCUAUCUCCGACCCCAUCCAUCCACGACUCCGGAAGACGCAGUGUGGUAACGAU  
AAGAAGCCGGUCAACAAAAAGACGGUGG

>EMBL\_CDS:BAC45250 BAC45250.1 Homo sapiens (human) receptor protein  
tyrosine kinase  
GAUGACUCUUUACUAGGCAUACCAAUUUCAGAAAACCUACCUCGUGACAGGGUAGGCCGAAGUGG  
UCCAGUAAAGAAGUAAUCAUC

>EMBL\_CDS:BAD02449 BAD02449.1 Homo sapiens (human)  
N-acetylgalactosaminyltransferase  
CUUGACCUCACACCUAGGUGUCGACCUUACAAGGACGACCCGGUCUCGGAACCGAUCAAGAGAGG  
UCGACGGCAUGGAGGCCAAG

>EMBL\_CDS:BAC54922 BAC54922.1 Homo sapiens (human) tripartite  
motif-containing 15  
AUCUAGAAGAGCGGCACGAGGAGCGUCAUUCAAAGAGGGUCGCCCGGUCUCCCGGUA  
CCCUCAGAGACGGACGAGGAGGAGAACCGUCUCGCCCGUCUCGUCCUAGAACGGGCUCUAAACC  
GGGGUAGACCCUCUCGCGCCCCUCCGUCUCGGCCGUCUUCACAC

>EMBL\_CDS:BAD89397 BAD89397.1 Homo sapiens (human) carbonic anhydrase  
VI nirs variant  
AUAUGUCACGGCAGUCGGUGACAGUACGCGUACCACCUCCGUCGACUAGACGUGACACAC

>EMBL\_CDS:BAC23110 BAC23110.2 Homo sapiens (human) KIAA2014 protein  
UCGAAGACACUUCUGAACUGCCUUCGCCUGCGGCGUUAACUACCGUAACUCAACGCCACACUCGUA

GACGUCCAAUAGGACCUUCAA

>EMBL\_CDS:BAC23107 BAC23107.1 Homo sapiens (human) KIAA2011 protein  
CCGGUAGACGAGGUUGGACCCCACCCCGACCGCCGGGUACAUGUCCAAGGCCGACGGUCCAUCC  
CGGCUCGGAGGAGACCGCCCCUCACCCAGACUACACCUACGAAGGUCGGCAUUGAAGGCCAACCU  
CGGUCCGG

>EMBL\_CDS:BAC23124 BAC23124.1 Homo sapiens (human) KIAA2028 protein  
AAACAGACUAUGUAAUUGUCGUUGAAAAGAGAUAGUCAGAGAGGUGCUCGAACGUGACUCUUUAU  
AUCAGACAAAAACAUCAGUCUGCUU

>EMBL\_CDS:BAC82348 BAC82348.1 Homo sapiens (human) scapinin  
CCGACCCCUCGACCGGGUGCCUAGAGAGGUCUCCAGACCCUCCUGACAGGUCCCUCAGUCGGGGU  
CGA

>EMBL\_CDS:BAC98464 BAC98464.1 Homo sapiens (human) GDNF-inducible  
zinc finger protein 1  
UGAGAACGGUGUACAAAGUGUGUAUUUCCAGAAAGUGGACACACUGUGGAAAAUACUAUUUAGU  
CGUACACCAAGACUCA

>EMBL\_CDS:BAC23123 BAC23123.2 Homo sapiens (human) KIAA2027 protein  
ACGAGAGGACCAAGAAGGAUUAACCCUCCACAUCUAAUCGUCGACUAAGACACGGAGGUGAA  
AGAACCCUAAAUCCUAACUCGU

>EMBL\_CDS:BAF31273 BAF31273.1 Homo sapiens (human) LUB protein  
CAGGAACGACCCGGACACGGGGCCCCAGCCGGCAGAGGCAAUGGUCAGGAGGGACUAGGACCCCG  
UGAUUCCGGUCGUGUCGGUCCUG

>EMBL\_CDS:BAD89424 BAD89424.1 Homo sapiens (human) interferon  
regulatory factor 1 nirs  
AGUGACCACGACAGGCCGUGUUGAAGGUGACCCUACACGGUCAGCCCCUCACGACGACUGUCG  
UGUGCCGCU

>EMBL\_CDS:BAF31266 BAF31266.1 Homo sapiens (human) KIAA0170 protein  
CCUAGAUAAGACAAGAAGGGGAUCAUCGGACUCUGCAUCCGAGUCCCAUUGUCCGACCAGA

>EMBL\_CDS:BAD02451 BAD02451.1 Homo sapiens (human) KIAA1199 protein  
CAACCUUACACGAGCCAACAAUAUCUAAAAGGGUCACCUUACACGAGACUUAUUGGACCCCUCA  
UGUAAGGGUG

>EMBL\_CDS:BAC98376 BAC98376.1 Homo sapiens (human) KIAA2036 protein  
GUCCCUUUCUCCGGUCCCGUGUCUCCGUCGACCCACCUCGGACGCCCGUGACACUCUACACAGGA  
CGAGGCGAGGACAGGAAGGACGGGAGAGGGAC

>EMBL\_CDS:BAC84969 BAC84969.1 Homo sapiens (human)  
N-Acetylglucosaminyltransferase IX  
CGCAUCGUCCCAGUCUCCAGGUCGCCCUGCGUAGGUGAGGUGGAAGGGACUCGUCAGUCCCUU  
GAACCCCAGUGACCCACGGAGUGUGACCAGGGCGGCCGGAAGACUGUGGAACGACACG

>EMBL\_CDS:BAC78211 BAC78211.1 Homo sapiens (human) hypothetical  
protein  
UCCUUGAAUAGUCAGUACCGCUCUCCAACGCAUCCCGCUACAGGUCAGCAGAGACCUGGAGCCC  
CACCGAGUUCGGACGAGGCCCCACUGUAGUAUACCCUCUACCGACGCGACGGGACAGACCCGGA  
GUCAGACCAACUAGGUCAAGAA

>EMBL\_CDS:BAF31253 BAF31253.1 Homo sapiens (human) HLA-G protein  
CCGUCCCUUCGACGAAGGUAGAGUCGUACUCCCCGAGGCCGUCGGGGAGUACGACGUGUACCGU

GCACAUAGAGACGA

>EMBL\_CDS:BAC57496 BAC57496.1 Homo sapiens (human) hornerin  
ACCCGGUGCCGACCUUCUUGCUGGACUCGGUCUGGGUACAACCCGGCACCGACCUCCUCACGGGGU  
UUGGCCUGGGUACAGCCGGCGCGGAUCCCCUGACCCGGUCUAGGUCUGGGAACAGCCGGCACCGGG  
C

>EMBL\_CDS:BAC99057 BAC99057.1 Homo sapiens (human) KIAA2038 protein  
CGGGAGAACGUAGACGUCGAGGUCGCCCCGACGCUCACGACUUCGCCGGGACCGUGACUUUCCCGU  
CCGAGUCCGAAAGCAACCACGCCACCAAGUACGUCUACUCCGUCCCCG

>EMBL\_CDS:BAD89015 BAD89015.1 Homo sapiens (human) extracellular  
matrix protein QBRICK  
CUUACGUUCUCACACUAUGCUCUCCUGACAAAACAGGUUAACCAGAUGGACUUACCACUUAUUUUG  
UCCAAGAAGGGUGUGAGAGGGUAAAG

>EMBL\_CDS:BAD86792 BAD86792.1 Homo sapiens (human) diacylglycerol  
kinase kappa  
CGGAGUCCCGUCUUGAGACCCCCGGUCGAGACAGUGUCCAAGACCCCAGCCGAGACCCCCGGUCGAG  
ACCCCGUUGAAGACCUCAGUCGAGACCCCCGGCCGAGACCCUUGGCUGAGAUCCCGUCCAAGACCUC  
AGCCGAGACCCCCG

>EMBL\_CDS:BAD66828 BAD66828.1 Homo sapiens (human) KIAA0596 splice  
variant 1  
ACCUUGAGUGACCAUAGGUACCACCCCAACAGUGAGCCGAGGCCCAUCUGUUAUGGUAGAAGUUA  
CCCACGUCCAAGGU

>EMBL\_CDS:BAD52439 BAD52439.1 Homo sapiens (human) non-muscle myosin  
heavy  
CCGGUCGCCUAACAACUACUUCAAAAUAGGUGUAUCUCUAUGAAUAGCCGUCGAACGACACGG

>EMBL\_CDS:BAD37141 BAD37141.1 Homo sapiens (human) serine/threonine  
kinase  
CCAGGAGGAGUCCGGCGAAUAAAAGACGCAACAAUGAGACUCAGAAGAAUCUCAUUCUUAUUCUC  
CACCCUUAACCGUCCUGG

>EMBL\_CDS:BAD52436 BAD52436.1 Homo sapiens (human) filamin A  
AACCCACCGACGGUCGAGGGUGUAAGUGGGACUUCCCCCGACAACCCCUACGACUGCGGAGGGGU  
C

>EMBL\_CDS:BAH02288 BAH02288.1 Homo sapiens (human) liver X receptor  
beta  
CUAGAGGACCUGACUCUACUACCGGUCGAGGCACUUCACCCGUUUCGCAACGACCGCCCGUAGAG  
CCCUGACCCCCAG

>EMBL\_CDS:BAG15901 BAG15901.1 Homo sapiens (human) UAF1 RNA  
polymerase II, UAU box  
CGUUCUACUACGGAAGAGGUAAAAGUCUGUGUGGUCAUUAUCUUAAGGACCAGGAAUAGGAAGAAG  
UAACCAGGGCCCCCACCUCACCUCUCCGUAGUUGAACG

>EMBL\_CDS:BAF94759 BAF94759.1 Homo sapiens (human) U cell receptor  
alpha variable 35  
GUCAAGGACGGACCAACACCCGUCGUGUCUUAUCUACGGAUGUAGUGAUCCAUAACCUACGAC

>EMBL\_CDS:BAF94561 BAF94561.1 Homo sapiens (human) U cell receptor  
beta variable 27

---

GACCCAGAGGGCCGAGGGCGAUCUUGACGACCGUGUCUUCAUGUCUCUCCAGACCAACCCCGACC  
CGCUGAGGUC

>EMBL\_CDS:BAF63624 BAF63624.1 Homo sapiens (human) MHC class I antigen  
UCUUUGGGUCCCCGGGUCGUGGAGUCCCACCGGAGUACCAGUCUCUACUCCACCACCCAGUGCACA  
CAGA

>EMBL\_CDS:BAF94849 BAF94849.1 Homo sapiens (human) U cell receptor  
beta variable 3  
AGACCUCUAAAUCCACUCUUCGCUAAUCCUCGACAAAGUAAAUAUUACUCGAGGAAUAAUAACAU  
CGAUUUGUAAUAGAAGUCU

>EMBL\_CDS:BAG71128 BAG71128.1 Homo sapiens (human) riboflavin  
transporter 1  
CGGUAGUCCGGGUCGUCCUCCGUGGUACCCGACUCUUGUCGACUACCUGGAGUCCCAGACCCGG  
UCCCUACCA

>EMBL\_CDS:BAG12377 BAG12377.1 Homo sapiens (human) N-acylsphingosine  
amidohydrolase 1  
GUAUCGGUCGUUUCGAACUUCGGAACUUCUGUCAAAACAACAAAGAAACCUUUAGGUUUAAGUGA  
CAAUUUCCAAAUAACGAGUCAAUAC

>EMBL\_CDS:BAG48316 BAG48316.1 Homo sapiens (human) acetyl-Coenzyme  
A carboxylase alpha  
GGCGUAAUGGUACGAGGCGUGCCUAAGGAGUUAGAAACUACCCAGGUACUAUUGGCACCCGUGUU  
UCAACUCCUUCUACACCAAUGUCAGUCACGCC

>EMBL\_CDS:BAG48312 BAG48312.1 Homo sapiens (human) collagen type V  
alpha 1  
GGACCUCAGGACCGUUUGGGACGUCGGGGUGACCCGGUCCCCAGGUCCUUCGGAGACCC

>EMBL\_CDS:BAF63512 BAF63512.1 Homo sapiens (human) small G protein  
signaling modulator 2  
GGGCCUCAGGGCCCAGGACGAAGGACGAGUCCAAAACCAGAACUAGAAGUCCCAGGACCCCGAG  
GCCC

>EMBL\_CDS:BAF80583 BAF80583.1 Homo sapiens (human) MYO5A variant  
protein  
CAAAACACAUUAAUUUCAAUAGACGUAAAGGAUUAGCAUCGUAAAUUUAAGUCCAUUGAAACGA  
CUCCGUGUUUCG

>EMBL\_CDS:BAF63529 BAF63529.1 Homo sapiens (human) Sickle tail  
GUCCGCCACCCCUACCCAGGUCCGACUUCGUCCGAGGAGACGACCUAUAAAACAUCGAGACCAG  
ACACCCGAACCAGGUCGUAGAAGUGACGAAC

>EMBL\_CDS:BAG06714 BAG06714.1 Homo sapiens (human) MYO5B variant  
protein  
UCGAUAGACCCUCGGCACCCGACCUCAUAAGACGCACCCGAACCAGCCGGUGCCGAAAGGAGUCG  
A

>EMBL\_CDS:BAG06722 BAG06722.1 Homo sapiens (human) DNAH10 variant  
protein  
ACCCCUUCGGGAACCACCCAGGCACCACUCGGUGUCCGCCUUCAGACCCACCCCGAACCCACUAG  
GAGAGGUCCUGAAGAGGU

>EMBL\_CDS:BAD92948 BAD92948.1 Homo sapiens (human) RAB40B, member RAS

oncogene family

CUCGAAGAGGACCUCUCUAAGGCGGCACAAAGAAAGUCACGGAAGGAAUUCUUUAAAACGUCGAC  
AAAGACCACGUCAAAAACCCCCCGAGACCCCCCGCCUCGUCGAAGUGAAACGCCUCCGACG  
AG

>EMBL\_CDS:BAD92557 BAD92557.1 Homo sapiens (human) LEPREL2 protein  
variant

AGCCUCCUACUUCGCGACCUACAGGAGAGACCCAGGCUCCGGUCCAGAGCCGAGAGGGUCGACCC  
GGACCAUGACCAAGUCUCGGGAGAACCUCGCGAGUAGGAGGCC

>EMBL\_CDS:BAD93084 BAD93084.1 Homo sapiens (human) zinc finger  
protein 211 isoform 2

CCGACCUCGAAGCCGAUUUCCUAAAAGGUGUAAGUAACGUGAGUACUCCAGAAAGAGGUCACACU  
UGAGAGACCACCAUUUAGUCCGACUUCAAAACCGA

>EMBL\_CDS:BAD93143 BAD93143.1 Homo sapiens (human) tripartite  
motif-containing 38

UGCAGAAGGACUCCACUUCGGAAGUGUUGGGUUCUGUGUCCCCUCCGUCAUUUAGAGGACCUUC  
UACA

>EMBL\_CDS:BAE06093 BAE06093.1 Homo sapiens (human) UNPO2 variant  
protein

UUGAACCCCUAGUACUACAACUCCCCGGACAACUCCCGCAGUGACAGGUCUUCGAGACUACUCAG  
AAGUGUCUAGAAGACGUCCCCGAGGUUCCGAGGGAGUGUUCACAACAUUAGGAGGCUCAA

>EMBL\_CDS:BAD92719 BAD92719.1 Homo sapiens (human) Diaphanous 1  
variant

AGUUAGUAGUACAACCCUUGUCGUCCUAGGUACCGAGACUGGUCGUCAUCCUAAGGAAGAAGACA  
GAGGUUGUACCAGAACU

>EMBL\_CDS:BAD92976 BAD92976.1 Homo sapiens (human) Inositol  
1,4,5-trisphosphate receptor

CCAUGAACGUGUCCCCGACUACAGUAACUCCUAGUCACGCCACUACUACAGAUACGGUAACCCUG  
AGCACUCAGUGUUACGUUCAGACCAAGAGUACCGUCCCCGGGACCGUCAUGA

>EMBL\_CDS:BAE06086 BAE06086.1 Homo sapiens (human) CSPG3 variant  
protein

CGUGACUUCGAGGACUACAAGGGACCCAGAGGUGGACUAGGAGACCGAGACCCACCCCAACCCUC  
GAACUCCUCGGGUCACA

>EMBL\_CDS:BAE06083 BAE06083.1 Homo sapiens (human) APC variant  
protein

CAACGACCCGUCCAGAACUUCUCCCCAGCUUAGAGAUCUAGGACUAGAUCUCCACGAAAUGAACUG  
GGUGGAUAAACCCUACAGACGGACCGUUG

>EMBL\_CDS:BAD92747 BAD92747.1 Homo sapiens (human) EBNA-2  
co-activator variant

ACCGUUACGUCUUGAGAGGGGACGCCCCCGUAUCCUCGGGAGAUGUCCCCCACUGACCGUUAC  
AGU

>EMBL\_CDS:BAD93123 BAD93123.1 Homo sapiens (human) MSH5 protein  
variant

CAGGUCACUACUGAAACUGGGAGGGAAACAGGGGUGGUGUAAGACACCUCAACCCGUGUUUCCAA  
GCCCGUGUCUCAAGGUAGUCUCCUA

---

>EMBL\_CDS:BAD92921 BAD92921.1 Homo sapiens (human) Synapsin-3 variant  
GAGCCACCACCGCAUCCAAAACCGGUACCGCUGGUGCGACCACUACAGGACCUUCAGUUCGACCA  
AAAGGUGAAACUAGAAAGGGUAAGGUCGCACCCGUACAGGGUCGAACUGAUGGUGGCC

>EMBL\_CDS:BAD93102 BAD93102.1 Homo sapiens (human) latent  
transforming growth factor  
AGUCCGUAACCACCCCAACACCGUAAGGGACACUGGGUCCGUCCACGUACCCACUGUGACCAGCA  
CUGGACCGGUCGGACU

>EMBL\_CDS:BAD93140 BAD93140.1 Homo sapiens (human) LL5 beta protein  
variant  
AGGUACGAUAGUCUCGAUAGCUCGAGUCUCAUAGUUUCCGGACCAGGAACAUCGACACUAGACC  
UAUUACCU

>EMBL\_CDS:BAD92774 BAD92774.1 Homo sapiens (human) G protein-coupled  
receptor kinase  
CUACCCACCUGAAACAGAACCCCAACCGAAAUGCGGCCGGCGAGACGUGAACACGCCCCAGGU  
CGUCCUCACGAGGGUCUACCUCAACCGGGGCAA

>EMBL\_CDS:BAD92514 BAD92514.1 Homo sapiens (human) son of sevenless  
homolog 2 variant  
UCCUCUAAAUAUCCUUUUCAACUAAAGGAUCCUUUAGCUCACCAGACAAACGUCAAAAGCUCCAA  
GUUAAAGAUCACUGAACAAACUUGUUUAUUAGACAUUUGAGAAAAAGUCUACGUGAAGGGUACCCC  
AAUCCAAAAGUUUCUUAGAGGA

>EMBL\_CDS:BAD92702 BAD92702.1 Homo sapiens (human) hypothetical  
protein FLJ16665  
CUAGGUACCVCUAGACUCGUUCCCGUUCUACCUUUACCCAGAGAAUAAUCGUAACGAACUAG  
UGGUACCCAA

>EMBL\_CDS:BAD92714 BAD92714.1 Homo sapiens (human) anaplastic  
lymphoma kinase Ki-1  
CGGGUUCGACCUCUGACAGGGUAAGGUUGUUCACUUCUCCGAGACGUCCCGUAGAACCUCGGA  
CCCCUACAAGGAAGUGACGUC AAGAAGUCCG

>EMBL\_CDS:BAD92530 BAD92530.1 Homo sapiens (human) SWI/SNF-related  
matrix-associated  
CGAGGAGAAGAGACACCGGUGCGAAACUGAAUCACAUUCCACAACUCCUGGAAAGAAUCGUAAA  
AAGAAGAAACGAAGACCCCAACCACUUCUCCCCUCG

>EMBL\_CDS:BAD92651 BAD92651.1 Homo sapiens (human) A-kinase anchor  
protein 13 isoform 2  
ACAACCUCGCCUUCUCUUGAGAUCCCGAUACACAACCCUCGUUAGGAGACCCUCUCCCCACGAC  
GUGAGUCGGUACAGGGCCUUUAGUAGAGGAAGAGAAGGUUGU

>EMBL\_CDS:BAD92907 BAD92907.1 Homo sapiens (human) protein tyrosine  
phosphatase,  
CCAAGAAAGGUCAAGUUCUUCUAGAAUAAAAGUUUCCUACAAGGAACUUCUCUAAAUGACCAUG  
CCCUGG

>EMBL\_CDS:BAD92640 BAD92640.1 Homo sapiens (human) iron-responsive  
element binding  
GUCUUAGUGUUCUAGGAGCCGUCCAUCAGACCGGAGACGUCCCUUCGAAGAAUCCGACGUGAAAU  
UCACCUCUCUGAAAGGACGAAAGACGUCCAGUGGUGGAGGUCCUAAACCACGUAAGAC

---

>EMBL\_CDS:BAE06113 BAE06113.1 Homo sapiens (human) C14orf159 variant protein  
GGUCUCCCGUCGUCUUCGGUCGUACCCAUUGUGUUCGGUGACAACAGAACAUAACGUGGGCGGACC  
GACACUGGACGACCCAGAGAAGACC

>EMBL\_CDS:BAD92895 BAD92895.1 Homo sapiens (human) integrin alpha 3 isoform b, precursor  
AUCGGCUUCCACCGGUUGGGUCCGUCAGGGUCGAAGAGAGGUACCUAUUGGACGACCCCGACAGA  
CUCCUCGGGGAAUCUCGAU

>EMBL\_CDS:BAD92894 BAD92894.1 Homo sapiens (human) platelet-derived growth factor  
CGUCCGUCUGGUCUACUACAAGCCGACCCCGUACGGGGCCGGUGCUGUCGCCUGACAGACA

>EMBL\_CDS:BAE06120 BAE06120.1 Homo sapiens (human) UNC variant protein  
GACCAAGAGUAGGAGACACUCUAGCUACCACCAUGCCAGAGGACCGUGCAGAAACUACGGCAUCC  
AGUCGAGUUACGGUAGCUAGAGUCGGUCCCCGAACUUGGUC

>EMBL\_CDS:BAE06087 BAE06087.1 Homo sapiens (human) MEF2D variant protein  
UGGUCCACCCUGACAACGACUCCACCGACAACGCCGACGACUCCGACGACACCGACACCGACGAC  
ACCGACGCCACCGACGACGACACCUCGACACCGACGACGCCGACGACCCCGACGACACCGACAA  
CGGUCCGUCACUGUAACGGAUCGCUGUCGGGGGGUCCA

>EMBL\_CDS:BAE06094 BAE06094.1 Homo sapiens (human) DAB1 variant protein  
CCAGCCCAAACGCCUCCCGUGCCCGCCUCCGACCCGGUAGACCUUUAGGAAUUUGCAAAGAAAC  
GGGUAAAAGACGGACCCGAACAGCCAGACACCUGAACUGG

>EMBL\_CDS:BAD92901 BAD92901.1 Homo sapiens (human) Hypothetical protein DKFZp666D035  
CACAUCCCAAAAAGAAGUCUUACUCAAGAGAAUACCAAUCUUUCCGAACUCGUUCAAGACUUCUG  
GAAGGGUGUA

>EMBL\_CDS:BAD92880 BAD92880.1 Homo sapiens (human) smoothelin isoform b variant  
CCCUGUCUCCCCAGAGAAACCCCGGUCUGUCUUCGAACAACUGGUGGACCGGGAGUCACGACCCC  
UCGCAACCUCUGAGGACUCCGAGUCCCGACCACCAGAACCACCCGACCCCCACCGAGACCCGA  
CGGA

>EMBL\_CDS:BAD92987 BAD92987.1 Homo sapiens (human) RE1-silencing transcription factor  
CAAAAGAAAUCAAGUGAAAACUCUGUAGGUAACAAAUAUCCUGUUCAUCCUACGAAUCUAAA  
CUUCACUAUGACAUCUAAUG

>EMBL\_CDS:BAD92820 BAD92820.1 Homo sapiens (human) phospholipase C, beta 2 variant  
CGUGGACCAGUCCGGCAGCACCGCCCUUGUCGUCCCUCAAUUCGGCCUCAGGGCGACAAAGACC  
AACUACUUAACCAGUCCACG

>EMBL\_CDS:BAE06070 BAE06070.1 Homo sapiens (human) FASN variant protein  
CCCUCUCCCGACAGGUGGUGGACGUCGGCGGGUAGGUUGUCGCGACCCUAGAGUCCCAACCCCG



AUACCUUCACGUCCAACCCCCGGGUCUCGGGCACGAG  
>EMBL\_CDS:BAD92549 BAD92549.1 Homo sapiens (human) DNA-repair protein complementing XP-G  
AGGACACCACUCUCUCCAGGGGACGACUUACGAAAUAAUCGAAAUUGUCCCCAACGAAGCUUCGG  
UUAACCU  
>EMBL\_CDS:BAD93125 BAD93125.1 Homo sapiens (human) natural killer-tumor recognition  
AAAUCUUGCAAUUGAAAACCGGAGGAGAAUACAAAGGAGGAAGACGAAGAGAGUACAAGUUCAA  
GUGAAAGACUUCUACUAAGACUUCUUCUCCUCCUUAACCUUCCCCUAGGCUCGGAAGACUU  
>EMBL\_CDS:BAD92735 BAD92735.1 Homo sapiens (human) low density lipoprotein-related  
CGUAGACCCCCCGCAACCUCUCCGUGUCCGUGCGUACACGGCAACAGGUCGGCGAAGGGUAA  
CCCUGUCCACG  
>EMBL\_CDS:BAD92858 BAD92858.1 Homo sapiens (human) zinc finger, MYND domain-containing  
GGACGGUGAACGGAGACAAAAGAGCGAGGUCGGCGAGGGUCUAAAGACCCUAGAUCUUCUCUU  
CACCUCUCACCGUCC  
>EMBL\_CDS:BAD92580 BAD92580.1 Homo sapiens (human) elongation factor, RNA polymerase  
AUCGUUCAUCGAGGCCAAAGAACAUCGGGAAGUCCCGGUCAUUCACUUAGUGGGACAGGGACAUA  
CCGGAGACUCUCUACCACGACGACGAU  
>EMBL\_CDS:BAE96739 BAE96739.1 Homo sapiens (human) downstream of tyrosine kinase 7  
GGUCCGACGACGGGCGCAUCCUGCUCUCCGACGACCUCAUUCUCCUCACCGACGGUCACCGCUAC  
GGCGACAGGCUCCUCGAGACCGCCGGUUGGAGGACGUCGACGGCGCCUGCGUCGCCGAACC  
>EMBL\_CDS:BAE44474 BAE44474.1 Homo sapiens (human) hypothetical protein  
CGUAACCCCCGGUCCUGUUUCCCCGAGACGCCCCGACCCGGAGACCAUCCCGUCCAGACCUCG  
AGACGUCUUCAGGACCACGACCUACA  
>EMBL\_CDS:BAE17137 BAE17137.1 Homo sapiens (human) hypothetical protein  
CUUCCUACACCACGAUGUCCCGAACCACUGAAAGCCAACCCUCGUGGUUCAAGACACGAAAGAA  
A  
>EMBL\_CDS:BAE96351 BAE96351.1 Homo sapiens (human) mammalian diaphanous homologue  
GUGUUUAAGUCAUAUAGUCCCAUGAAGAGAAGUGUAUAAAGAUGGUCCUUUACUUCAUCGCAAC  
AAAAGACUAGACGACUAAAACAC  
>EMBL\_CDS:BAG70269 BAG70269.1 Homo sapiens (human) MLCK protein  
GGUGUAACUGGGACGGCCACGACCUCGGUUAAGGUCCGGUCAGGACUCCAAGAGCGACCCACAG  
AGUCCUCGGAACCGAAGGUGGAAACACCCGUCCCCGUCCACC  
>EMBL\_CDS:BAD92391 BAD92391.1 Homo sapiens (human) Utyrosine-protein kinase transmembrane  
GGAGGUACUUGGAGUGGCGUCUGUCCGACUAGAGAAACUCAACCCGGACAAACACGACCAAUUAC  
UCC

---

>EMBL\_CDS:BAD92390 BAD92390.1 Homo sapiens (human) formin 2 variant  
AAGACAUCAUUAAGGUCAAACGCUACUUAACUCGUUUACGAAAGACUUUUACACCUGACCUUGUC  
CU

>EMBL\_CDS:BAD92083 BAD92083.1 Homo sapiens (human) Apolipoprotein B  
variant  
UUAGUAUGAAUUUAAGGUACCUCUUCUCUGUCAUCCAAAACUGAACCAUAAAGGUAAUUCAGA  
ACGAACUUUAAGUAAGAGUUUUAAACCUUAAACCCGAAAACACCAA

>EMBL\_CDS:BAD92195 BAD92195.1 Homo sapiens (human) protocadherin  
gamma subfamily A, 7  
AUAACUAAAAAGAUUAAUUUUCCAUCCAAAAGACCUUACCACGUCCAGUGGAGUGGUAAGAAAG  
GUCUUAGAGACAGAACAUCAUCUJUUCUCGUUAC

>EMBL\_CDS:BAE53437 BAE53437.1 Homo sapiens (human) C8orfK32 protein  
UCCCCAAGUCGAGACCUCSCCAAGAAUAACGAUCUAAAAUGCAGUUACAUCAGUCGUGACCCCG  
GACAGGUAGGAGACCUGGACCUGAGGA

>EMBL\_CDS:BAD92137 BAD92137.1 Homo sapiens (human) hepatocyte growth  
factor isoform 1  
AACAUAAAGAAGAAAAGGAAACAGGGAGACGUAUCCCCUACCGCUACCCUCGUCUCCUCUACG  
UC

>EMBL\_CDS:BAD92305 BAD92305.1 Homo sapiens (human) ash1 (absent,  
small, or  
CAACAGUGAAAGUCUAAGAUCGAACGAACCUGAAAGUCACCGUUGUUUACCUCGGUGACUGUCAU  
GUCCACCGAAGUAGAACUGACCACUGGAG

>EMBL\_CDS:BAD92062 BAD92062.1 Homo sapiens (human) poly(rC)-binding  
protein 2 isoform  
UCCACCAGGGAGGUCCAGUCCCAACUCCGUGUACCUGCCCCACCACACCCCUUUCGAGCGUGACA  
GCGACGGACACGACAUGGACAGGACUGGUGGA

>EMBL\_CDS:BAD92359 BAD92359.1 Homo sapiens (human) glypican 1  
precursor variant  
CCAAGAGGAGGUAGAGCGACCACGUCGUCCACAUCGGGACCCUGUCUAGGCGUCCACGAGUGGA  
CACCCCUUCCGGUCACACUCCCUUCCCCGA

>EMBL\_CDS:BAD92458 BAD92458.1 Homo sapiens (human) hypothetical  
protein FLJ41407 variant  
CCGAGGAGGUCCACGAAGACAUCUGUGUCCACUCUCCAUUGUAGGGUCCGGGACCCUACCACCAG  
AAGGGACCCGUCACUGGACACUCCCGG

>EMBL\_CDS:BAD92438 BAD92438.1 Homo sapiens (human) WD  
repeat-containing protein 3  
CUCUAUGACGGUAUUCGGUAUCCUACCCCAACGACCCUUCACCUUGGAGAAAGGGACGUCGAAA  
UGUUUACCGAAACACAAGGAAGUAAAAACGUCAAAGAA

>EMBL\_CDS:BAE16982 BAE16982.1 Homo sapiens (human)  
connexin43-interacting protein of 150  
CAUCAUAAACCUGGUAGUCUAAAAGAAAGUUAUGACAUUCCGUUAACUUGUCAGACGAGAUUU  
AUGAUA

>EMBL\_CDS:BAD92206 BAD92206.1 Homo sapiens (human) KIAA0182 protein  
variant

---

AGGAGGAGAAGGAGGAGGAGGCUCAGGGCCAGGUUGAGGACCCAACCCCCGGGAAGGAACGUCA  
CCCCCGAGGACGACGGGUAACACGACCCACCUCGCCGCGCCGACCUCCU  
>EMBL\_CDS:BAD92022 BAD92022.1 Homo sapiens (human)  
phosphoribosylglycinamide  
AAGGUCGACGUUCUGGUGACCCGGAAGUGUUGUUUCGUCCCUUCAGACGUGAGUUUACUUCGAC  
GUCCGAAGAAGUCCAAACCACUUUCGGAAGGUAACACGCCAACCCU  
>EMBL\_CDS:BAD92171 BAD92171.1 Homo sapiens (human) plexin C1 variant  
CGACACUCUGAAAGUAAGAACAGCAACCGCAGAGACAAUACGUAUAGAAGUCACUUCUACACCCA  
CUUCGGUGGACUGAGUCCCUUCUUUCAAGAGUCUCG  
>EMBL\_CDS:BAE46995 BAE46995.1 Homo sapiens (human) PPAR gamma  
DBD-interacting protein1  
CCGCACCUACCCCAACGGGAACCGGUGCAUCUUCACGGCGCUCUACUUCGACUGUUACCGCAGGC  
ACGUCGCCAUCAAGAGCACCUUCUGGUCGCGCCGAGACGGCGCGG  
>EMBL\_CDS:BAF43710 BAF43710.1 Homo sapiens (human) hypothetical  
protein  
CCUCCGACAGAGGACGUCUAGUACCUCCUAGACGACAAGUGAAACUACUAUAGUAGUUACAAAC  
UCUUGUCCUGUAGGUCUAGAGGGACCCGUUGACGACCUCCGCCGAGG  
>EMBL\_CDS:BAD92025 BAD92025.1 Homo sapiens (human)  
Retinoblastoma-associated protein  
AAGUGUUUCACAUAAAUCGGCCUCUAUCCGAUCGGCUAUGUGAAAAAAUAAUUUUGUCACUU  
>EMBL\_CDS:BAD92410 BAD92410.1 Homo sapiens (human) transducin  
beta-like 3 variant  
AGGACACUCGGACACCGGUCGUGCAACAGCAACCCCCGUUAUCGGUGCGACAACUACAGGAAUAG  
UACCGUCGCGACUCACCAGACCCGGACGUCCU  
>EMBL\_CDS:BAD92113 BAD92113.1 Homo sapiens (human) axin 1 isoform a  
variant  
CGACUCCCGGCCGGGUCCCCACGAGUUCUCCUGUUCUCCAGACCUCAAGAGUACCCCGACACCGAAG  
GAGCAGGGGCUUCUGGGCACCCGGCCAGGACGCCA  
>EMBL\_CDS:BAD92250 BAD92250.1 Homo sapiens (human) sorting nexin 1  
isoform a variant  
UCCUCCUUCUUCAGUAAACAACCGGACAAGGACCACCUCGACGAGUAAAAAAGAAGGUGGA  
>EMBL\_CDS:BAD92184 BAD92184.1 Homo sapiens (human) chordin isoform  
a variant  
CACGUGGAGAGGUCACGGGGGAACGUCCACGUCUGUCGUGUGAAUUAUUCGGUUUCCCCCGU  
GUUGCCCCACGG  
>EMBL\_CDS:BAD92413 BAD92413.1 Homo sapiens (human) calcium channel,  
voltage-dependent,  
GUAGAGGGGUCUGACCUUGACCUCAAUAGCGGACUAAACGACCUCGGUCUCCGCCAAGACCGCGUCG  
AAGACAAGGACGUCGUCUCCGACAGGUCAAACUGCCCCGACCCUAC  
>EMBL\_CDS:BAD92392 BAD92392.1 Homo sapiens (human) serine/threonine  
kinase 23 variant  
GGUGUGUGUCGUUCUACAAGAGCCCGAACUACAGGCACACCUACUAGAACGUGAACCACACC  
>EMBL\_CDS:BAD92189 BAD92189.1 Homo sapiens (human) colony stimulating  
factor 1 isoform a

GACCCCCACACUAAGGUCAGGACCGGUCACCCGGAGUGCCCCGGGUGGGACCCGUUCCGACAUG  
GUCAAUGUAGACGGCC

>EMBL\_CDS:BAD92109 BAD92109.1 Homo sapiens (human) SUMO-1 activating  
enzyme subunit 2  
UGAAAAAGCCCCGUAGUGGUUGUUGAAGUUUAAGUUGCAGGAAAGGAUCCAGAAGUGAUACUUC  
CUACAACUAGUUAUUUCAUAUCAGGACCUCCUUA

>EMBL\_CDS:BAD92020 BAD92020.1 Homo sapiens (human) Oviduct-specific  
glycoprotein  
CCCAGUGUCUGACUACUGGGUGUCCCCAGUCCCAGAAAAGGGGUGCCCCAGUGUCUGACUAUUGGG  
UGUCUCCAGUCCCAGAAGACAGGUCACCAGUGUCUAACUACUGGGUGUCCCCAGUCCCAGGAAGAG  
AGGUCCCCAGUACCUGACUACUGGG

>EMBL\_CDS:BAD92212 BAD92212.1 Homo sapiens (human) nuclear  
transcription factor Y,  
GACUAUGUCCGACCCGAUUCGCCUAUAUGACGUCGACCGGCCGUAAGUCGACGUGGCCCUAGACG  
ACCUAGAGAGGACACAAUC

>EMBL\_CDS:BAD92489 BAD92489.1 Homo sapiens (human) chapsyn-110  
variant  
GUUGUUCGUACACGAAACCUUAACCACUCAUGGAAGGACCUCUCUACCCACCGUCCCUCCAAU  
AUAAGAUUUCACGGUAACAAC

>EMBL\_CDS:BAD92053 BAD92053.1 Homo sapiens (human) calpastatin  
isoform a variant  
CGACAUCCGCUGGGUGUCCACUUCAGUCUACUGUUCGCAGAUUUCGUAGUAGACCGGGAUACCC  
AAAUCGGUUAUCA

>EMBL\_CDS:BAD92377 BAD92377.1 Homo sapiens (human) son of sevenless  
homolog 1 variant  
GUCUCACUCCAACCACCAUACAGCUUAGUAAAAGUCUUCUAAUCCUCUCAAUUAAGAAACAGAA  
GAAACAGGUGUGUGAAGGUUGAUUAAGAC

>EMBL\_CDS:BAD92110 BAD92110.1 Homo sapiens (human) PUPL1-associated  
RhoGAP 1 variant  
CUCAGUCACAAGAAUUGUCGUGCAACAGAUCAAGAUUCCCUUUUUAAGGAAAAAGUGACCU  
ACUCAGGUGACUAAG

>EMBL\_CDS:BAD92177 BAD92177.1 Homo sapiens (human) hypothetical  
protein DKFZp434B216  
GUCUUCUAUUUAUGACUCCACCUUUUCAACUUCGAGGUUCCGGUACAGAAGUCAUAUAUAAAAG  
AC

>EMBL\_CDS:BAD92356 BAD92356.1 Homo sapiens (human) eukaryotic  
translation initiation  
AUCCGAAGGUCCUAAGACCAAAUUUACCUUUACAUUGGGGUAGUGGUCUUGAUAGACACCUCGGA  
C

>EMBL\_CDS:BAD92300 BAD92300.1 Homo sapiens (human) Polyhomeotic-like  
protein 1 variant  
GAUAGACCCCGGCUCUCGACGGGGACUCGAUCUUGAGGGUAACCACCUUAACCUCAAGACGAGC  
GAGAGUCAGAGGUACUAUC

>EMBL\_CDS:BAD92412 BAD92412.1 Homo sapiens (human) collagen, type V,

alpha 3

GUUACACCGGGAAAAGGGGGAACCCCGGUCACAGAGGGAAGUCGGGACCCUCCGGUCUCCCGGGG  
UCCCCCGGUCCUCCCGGUAGAC

>EMBL\_CDS:BAD92396 BAD92396.1 Homo sapiens (human) Uhyroglobulin  
precursor variant

UGGUACAUCGUCGUCGGAGCUGCGCCCGUAGACUCAGGAGCGGUGGGUCUCUUAAGACGUCACGG  
ACCAUUUCCGACAAAACGAUGACCA

>EMBL\_CDS:BAD92334 BAD92334.1 Homo sapiens (human) KIAA0367 protein  
variant

AAUCAACAAACGUAAAGGAUAAAGACUCAAGGGUGAACCACACACAAUAUUACUCGAUCGU  
CUUCACUGAACUACAUUCGUUCACU

>EMBL\_CDS:BAD92066 BAD92066.1 Homo sapiens (human)  
G2/mitotic-specific cyclin F variant

CAGGUCCCCAACGUCCUAGACCCACAGGUCGCGGUCACGGACACCCAGGACCCAGGGAACAGG  
AGACCU

>EMBL\_CDS:BAD92357 BAD92357.1 Homo sapiens (human) AUP-binding  
cassette, sub-family C,

CCUGGACAUUAUACCAAGGAGGUCGACUGUAGGUUUUUCCUACAAAAGAGCCUCUCUAGUAAGA  
CUUAGG

>EMBL\_CDS:BAD92101 BAD92101.1 Homo sapiens (human) flightless I  
homolog variant

GCGACCCACGAGGCGUCCACGUCCAGACGUCCCGGCAGUAGCGACCCUCGACGGCCUCGACACG  
UACGUCGUCCCCAAAGGUAACUCGUGCUCGACAGUCCACGUGGUCGCGCGUAGACGC

>EMBL\_CDS:AAC04305 AAC04305.1 Homo sapiens (human) R29144\_1  
UGUCGCGUAGUGGUGGUGGUCGUCGUGCAUCAAACAGGUCCUACCCAGACCGAGACGGCACCCC  
GCAGGUCACCGUAACAGGGUGCUGCAGCAGUCCGAUGACACCGUCACCACCACCACCACCA  
CCGCCGACA

>EMBL\_CDS:AAC24313 AAC24313.1 Homo sapiens (human) Unknown gene  
product

CCCUACAACACUCCUCGUACUCCUACGACUCCCGGGCCCCGGUCACGAGUUACAUAACCCUAGUC  
GUAAGAGUCAGACCAAAGGUGACGUAGGG

>EMBL\_CDS:AAS07423 AAS07423.1 Homo sapiens (human) unknown

UCCCUUGAGGUGGUCGAUGUUCUUCGAAAACGACAGCGUAAACAAGAAAGUUAUUUUUACGACG  
UCCUCUCGGACCACCGACGACAACCCACCGAAAGGGA

>EMBL\_CDS:AAC07983 AAC07983.1 Homo sapiens (human) P1.11659\_4  
CUCCCAGGUUAUUGUGGGUACCGGACUCGGUGGUACGACCACUGUAGCGGUCCCAACCUCCCGU  
CAUCCUAUCACAACCUCAGGAA

>EMBL\_CDS:AAS07390 AAS07390.1 Homo sapiens (human) unknown

GGGACUUAAGUCCUACUACCACUCGUCCACGACCCCGUCCUCCACCACCAAGAGAUUCGUGGACU  
UAAACUCAGUAGGACUUAUCCC

>EMBL\_CDS:AAC08453 AAC08453.1 Homo sapiens (human) KIAA0324  
AGGUCUAAAGUUGUAUCCUGAGCGACUCUUGAGUGGAGAUAGAACAGAAUAACCUUAGACCU

>EMBL\_CDS:AAB94785 AAB94785.1 Homo sapiens (human) pNORF1  
ACGUAGGACAGUUUCCUCCAGCUGAAGGUGUGUUUUAGGUGGACCUCAACACUCAGUGGAGGUG

UCCACGU

>EMBL\_CDS:AAC32592 AAC32592.1 Homo sapiens (human) APXL  
UCCAGAGGACCCAACCCCAGGUUCAGCGCCGCGAACUUCUGCACCAGGAGUCCUGGGCCCGAAC  
CCGGAGAAAGUCCACCAGA

>EMBL\_CDS:AAC15789 AAC15789.1 Homo sapiens (human) Notch 3  
GUCCUGGGCCCGAUCCUGCCGUGACCGGAGGUACGACCGUACCGACCCUGAGCGUCCUCUGUCC  
UGUCAGACUGUCGCUCCUGGACUCUUCGGUCGUACUGUUUCGUUGCCUUUGGAGGCGGACCCAG  
GAC

>EMBL\_CDS:AAC08455 AAC08455.1 Homo sapiens (human) R30385\_2  
ACACUUUCCUCACCACUUUUGCUUUCGGUAAGGGUGUACCGAAUGUACAUAUACGGAAGACAGAU  
GUAAGGACUAUAAGUGU

>EMBL\_CDS:AAC08447 AAC08447.1 Homo sapiens (human) CBP  
CCCAAACACCGGGGGUCCCUUCAGCCUUCUGGACUAAGACUUUAGUUCAAACCCCGACGACUAG  
A

>EMBL\_CDS:AAC27426 AAC27426.1 Homo sapiens (human) Untranslation  
initiation factor  
CGAGCCCCAAGACGAACAUCGAACACUAUACCCUGAGCUUAGUGCCAACAUA AAAAGCCUAGAAG  
ACUGCGUUCACGAGUCUCGGAACCG

>EMBL\_CDS:AAD03158 AAD03158.1 Homo sapiens (human)  
immunoglobulin-like transcript 10  
CGGGUCUCCGACCCAAACCCUCCAGGGACGUUCACGAACCCGAAAGACCGGGUCUGAGUCGGA  
CUCCG

>EMBL\_CDS:AAC97987 AAC97987.1 Homo sapiens (human) SN24\_HUMAN  
CCGCCUCCCCGUCACACCCGCUUCGACCGUGACGGCGACGGGCACGACGUCACAGACGAGAGUAG  
GACGAGGAGCACGA

>EMBL\_CDS:AAS02034 AAS02034.1 Homo sapiens (human) unknown  
AGACUGCCGUUCCGUUUACAUGUUCUGACGACCUUCCCGUCCUGGGCCUCGAGUCGUGAACUUA  
CGACUUUAGGUUCAGAUCCCCAAGACUCAACAGUUCACGAAAAACUUAACGAGCAAGUCU

>EMBL\_CDS:AAS46897 AAS46897.1 Homo sapiens (human) unknown  
GACCCGACGCACACAAGGCGACGUGGUCGACGACCCGACGUAGGACAAGUCUACCGGAGUCAC  
UGGUCCUCCUUCUGUAGACAGUCCAGUAGCAGUCAGCCCGUCGACACCACUCGGAAGUUUCCG  
UCGUGCC

>EMBL\_CDS:AAC33490 AAC33490.1 Homo sapiens (human) F20887\_1, partial  
CDS  
CCAAAGACCUCGGUGACUCGGUAAAUCGAGGUACACCCAACCGGGCAAAAACCACCGGCACCGAG  
GUCGUUGG

>EMBL\_CDS:AAQ96886 AAQ96886.1 Homo sapiens (human) unknown  
CGGUAGACCCGGUAGUCUGGACCGACGGCCCCGCGUCGUCGUUCUUCGGUUGACGUCUACCCCC  
ACGGCGACGACCACCGACUCGCUGACCACGACCGGACCCACGUCGAGAGUAGACUCCCGGGCCG  
ACCG

>EMBL\_CDS:AAC62835 AAC62835.1 Homo sapiens (human) R33374\_1  
CCGAGCUCACUAAGGUCUGGUCGUCGAACAACAGCAACGGGGGGCUCGCUCCUCGACCACCAGA  
CACCUGGUGAACUCGG

>EMBL\_CDS:AAC24489 AAC24489.1 Homo sapiens (human) H53\_GS1

GUCCUGAACGUCAGUUCGACCGGUAAGACCACAAGGACAGGUUGAAGGGUUUCCCGGACUACG  
GAGAAACCCCAUGUCAGUGCUGUCCCGACUACGAGAGUCCUGGUCGGACAGGAACGUUCGGGAC  
>EMBL\_CDS:AAX82033 AAX82033.1 Homo sapiens (human) unknown  
CCAGGCGGAACCUAGGGUACUCCUACUCCUCCGGGAACGUAAGGAGACCCUGGUCCACCAGG  
>EMBL\_CDS:AAC33801 AAC33801.1 Homo sapiens (human) R26984\_1  
CCUGUCGAGACCGUCUCCGAUCGGCGACGAGGAGUAAGAGACACGAGCCCUACUUGUCCCGGCC  
CCUCCUCCUGCUCGACCUCGGUGACGACCCCGGCCAGG  
>EMBL\_CDS:AAC25582 AAC25582.1 Homo sapiens (human) ubiquitin-52 amino  
acid fusion  
CCGUUCGACCGCCUCUCUUCGAGUUUUACGGUGGAGCGUCCGCGUUGUGGUCCACGUCCCACC  
UGAGAAAAGACCUACAACAUCAGACUCUCUCACGCCGUAGGAGGUCGACAAACGG  
>EMBL\_CDS:AAC23434 AAC23434.1 Homo sapiens (human) hypothetical  
protein  
GACGGGAGAGGGGAAGUAGACAAAGGCGACGAGGAAGACCCGGACGAACCCACCGAACCCGAACC  
GAAACCUCGGUCCUCCCCCGUAGAUCSSCGUCCGCCUACCUACCACUCCAACAUCSSCGUC  
>EMBL\_CDS:AAD30180 AAD30180.1 Homo sapiens (human) hypothetical  
protein  
GGUCCGUCCCCGACCGUAGUCCUCCGGAACGCCACACCCUCCAAGACGAAGGAGAAGGAGAGAG  
CCCGGAAGAAACCCGUCGCACCCGACUGGGGUCGAACGCGUAACGGACCGUGGUCUCCUAAGCCC  
CUCUCUGUGUACGGAGCCUGUUACCAGAGGUGAGACCCGGGAGAAACGGACC  
>EMBL\_CDS:AAC62840 AAC62840.1 Homo sapiens (human) R33083\_1  
CCCCGCGGAACAACUGUUACUCCGGGCUCAUGAACGCCGACGGCACCUACUACGAGGCCUCGGGC  
AGGGUGCUCACGAAGACGUGGACCUUCGCCCGCCGGCCCAGUAGACACCCGCCGACGCAGCGGAGC  
CAGCCGGCAACCCAGGG  
>EMBL\_CDS:AAS00377 AAS00377.1 Homo sapiens (human) unknown  
AAGUCCUUUCCUAACCCCUACCGGCCGUCUCUACUCCAAGAUUUGACGACCAGAAGGAGGACUU  
>EMBL\_CDS:AAC71655 AAC71655.1 Homo sapiens (human) hepatocyte growth  
factor  
AGUCCGUUCUUAACACGGCCACACCACAGACUACUAGGGUCGCGACUGUUUAGAACGGACU  
>EMBL\_CDS:AAD11988 AAD11988.1 Homo sapiens (human) BC85722\_1  
CGGCGACCCUCGGCGACGGAACCAGGGUCCCCGACCACGACCCCGUCCACGGUGGACUUCGACGA  
CCCCGUCGCACCCGUCCUACAUGACAUGGACCCACUAAGGGGGUCGGAACGGGUCCCGUGGACCA  
ACGUCCUACGGGUCCCCA  
>EMBL\_CDS:AAC62261 AAC62261.1 Homo sapiens (human) neuronal apoptosis  
inhibitory  
AAACCUCUUUACCGUUUAACCCUUUUGUAGACCACACUAGCAGAUUACCCAGUAGUGGAAGGACG  
GUAAAGAGAUUU  
>EMBL\_CDS:AAC24305 AAC24305.1 Homo sapiens (human) R31449\_3  
ACCCGUUUUGAGCCCAGUGACCAGAGUACGAGGUUCCGGGGCACUCGUCCGGUCCACCCCCUA  
GGGGCGACGCCCUUUACCGGGGUGGUCGGUCGUGCCCCACUCAACCCCGGUCAGGGACGUCU  
CACACCCACAGGU  
>EMBL\_CDS:AAC18916 AAC18916.1 Homo sapiens (human) Acetolactate  
synthase  
UUGGACGACGCCCUUCGGACCCCUACAGGUCCCCGUCGCCAGGGAGCCCGACUCCGAGGGUCC

GAGGACGJUUCUCCAA  
>EMBL\_CDS:AAX88848 AAX88848.1 Homo sapiens (human) unknown  
UCUAAACAUCUCAACUAUCAAGGCUCUCUAAAAGACUUCAGGUACUGUCAACCUUCAACUCUAA  
GAAAGUCUCGAAGAAAGUGAUUGAAAAAGUCUAGA  
>EMBL\_CDS:AAX88914 AAX88914.1 Homo sapiens (human) unknown  
AGGACCCGCCUCUGCGCCAGAGACCCUJUCGGAAAUCGUAGACCCUCCGGUCCAGAAGUCGAAG  
UCCU  
>EMBL\_CDS:AAX93134 AAX93134.1 Homo sapiens (human) unknown  
CCACGCACAUAACUCGUCGAGCCGGUCGACGUCUCCCAUGAACGUCUAGAAGACGUGGCCUCAG  
UCGUCCUUCGGUAGGUCCUCUACAGUUAGUAGAAGACGUCGUCGGCCGUCCGGAGCUUCUUCAU  
GUGCAUGA  
>EMBL\_CDS:AAD23604 AAD23604.1 Homo sapiens (human) DYN2\_HUMAN [AA  
474-870]  
CGGCUGAGGAGGUACUCCGACGAGACCAGACGGCUCUCAUAUCCAUCCGGUCGUCGAGCACCAC  
CUACUCCG  
>EMBL\_CDS:AAD19817 AAD19817.1 Homo sapiens (human) Human homolog of  
Mus musculus wizS  
CGGGUCCAUCGGUCACCGACUCCCGAACCGGGGUCACUACCCGCAGUCCGACUCGAGUGCUCUU  
GGACCCG  
>EMBL\_CDS:AAD21217 AAD21217.1 Homo sapiens (human) Putative map  
kinase interacting  
GUCCAGGAGCAGCAGACCCCGUCGACGGCCAAGUACCGUUACCGGAGUCGGCGCUUCCUGCAC  
>EMBL\_CDS:AAY24351 AAY24351.1 Homo sapiens (human) unknown  
CUCCACGUCCUGGUUCUAUUAGUCCUAAUAGUGUACAAGGUUAUAUAUCGUUAUGUGACUUACCA  
AAACAACACCCUAGAAAACCUAUUUUUUACUGACAACACCAAGACAUCGGAG  
>EMBL\_CDS:AAX93195 AAX93195.1 Homo sapiens (human) unknown  
CUCAGAACCAACUACAUAUAUACUCAGAACUCCGUCACACUAAAGAAAGACGUAACGUAACGA  
CAUUGACUAUAAUGACGACGAUAAGACAACGUUACAUAACAGAAGUAGACGGUCCUGAG  
>EMBL\_CDS:AAD39266 AAD39266.1 Homo sapiens (human) Human Fc gamma BP  
[AA 1-2843]  
CACCGGGACACCCCGACCUCUCCUCGGGUGUCUUGAGGAGGAAGACUAUGAAGAAGAGGUCGAGC  
CCUCCUGUG  
>EMBL\_CDS:AAX93216 AAX93216.1 Homo sapiens (human) unknown  
CACCCAGACCAACCGGAGAGUGAACCCACAGAACUUUCAUCUCCCGAUUCUUUUGGGUCCACUCU  
CCUUUGUAUAGGUA  
>EMBL\_CDS:AAY14753 AAY14753.1 Homo sapiens (human) unknown  
GACCUCGGUCCUUCCAAUGGAGGCUGGCACCAUCCUGACCGUUGACCCGUCGGUCCCGAGAAGAA  
CGGUGACUCUCCACCGGAGAGGGACGAGAUC  
>EMBL\_CDS:AAX81988 AAX81988.1 Homo sapiens (human) unknown  
ACCCAAAACAAAAGGAGAUCUCAUUAUUUAAGAUAAUGGGCCAUUAUCCUAUAACGAACGGGU  
>EMBL\_CDS:AAX88939 AAX88939.1 Homo sapiens (human) unknown  
UUUCACUAAGUUUUCUCCACAGAAGGAGUAGAGACGUGUCAGGAGAACCACACUGUCUACACUAC  
CUACCACGUGGAGAUAAAUAUAGUAGAAA  
>EMBL\_CDS:AAY14651 AAY14651.1 Homo sapiens (human) unknown



CACGUGUAUCAGUAUCACCAUCUGUCGCAGUGAAUCGACAAAGGGUGAAAACUGUCGGACGUG  
>EMBL\_CDS:AAF03518 AAF03518.2 Homo sapiens (human) unknown  
CAACCGAGGUUCUACGGUUCGGGUACGGUGGGACAAAGACCCCAUGAGACCUCCCGGUGACGAAU  
UCCGAACCGAGAGACCCGGGUCUUUUACCGUCCCGUCACCGGAGACGACCACCCG  
>EMBL\_CDS:AAY14751 AAY14751.1 Homo sapiens (human) unknown  
UCGACCACGUCUCCUGUACCAGGUGUCUCCCGUGGACCGACUUCAGUCGUGGGUCGAGGUCUCCACGC  
CCGGGUCGAGUCCCGGGGACGUGUUAGAGGGACCGUGGACCGGAGGACGUCGUCGA  
>EMBL\_CDS:AAD23606 AAD23606.1 Homo sapiens (human) R31665\_2 [AA  
1-673 ]  
UAGGGUCACAAGGGGAUUGUCUCUCAUGAGGUCUAAUAUCGAACACUCAGAGAGACAAUAGUGAC  
GGACCCUA  
>EMBL\_CDS:AAX93132 AAX93132.1 Homo sapiens (human) unknown  
AUCGCACCCUACAUGUUUGAAGGACAUGUCCUCCGACCUCGGAAAACACAUCCUUCUGUCGUCGG  
UCCGAU  
>EMBL\_CDS:AAC68599 AAC68599.1 Homo sapiens (human) cell  
cycle-regulated factor p78  
CCCACCACCGUGUCCUCACGACCCCGAAACCUAUGGAAGAAGAAGAGUGACCUCCUCCCAAG  
UGAGGGGCUUGUCGCGGGACCAAGGUGGGGUGACCGGG  
>EMBL\_CDS:AAC64294 AAC64294.1 Homo sapiens (human) PKY protein kinase  
CUUUUUUACGACUUACACCCUUAUACCAUAAGACAUUACUAAUUGAGGUUGACUUUCGUAAAAU  
AAG  
>EMBL\_CDS:CAB22795 CAB22795.1 Homo sapiens (human) hypothetical  
protein  
AGUACACGAACUACUACUAAAAAGAACGGGUUCCAACACCUGUCCUUCUGUUUCUCACGUACU  
>EMBL\_CDS:AAC97080 AAC97080.1 Homo sapiens (human) lambda 1  
immunoglobulin light chain  
AAACCCCGCGGAGGACCCUCUACGACCAUGGUCCAUGUCAUAAUGAAGGCUACAACCUCGACG  
AAGGUCU  
>EMBL\_CDS:AAD17540 AAD17540.2 Homo sapiens (human) nectin-like  
protein 1  
CGAGGUUUAGGACGAGGACGGUCAUCGGCAGGACCCUCUCCAACCGGGGCGGCCCGGGUCGUC  
GUCCGCUUGUCGUCUCCUGUCCUCGUCUCCG  
>EMBL\_CDS:AAC16813 AAC16813.1 Homo sapiens (human) immunoglobulin  
lambda light chain  
UCACCGACACAGGGGUCUCUACCUCGGUCUCUUAGCGAGUCCCUAGGGACUCCCGGCGAACAGUA  
AAACUAUCUACUGGUAGUAUCCCUUGACCGGACCGAAGACAACUUUGGUCAUUCUAAAAUAGG  
AGGUUAAAUAGAGGACUCGUCCACUACGACCGACAGACAGGACCCUGUGCCUGUGA  
>EMBL\_CDS:AAC39660 AAC39660.1 Homo sapiens (human) retinal pigment  
epithelium-specific  
AACUGCUCCGGGACUUUUCUCUUGAAGUCCGAGGUCGGUCUAUCAGAGCAGUGACGUGUCUUAAC  
GUCACCGUCAACAUAAACCCUCCGCACUGAUUUUAGAACGGACACAGUCGGAACAGUU  
>EMBL\_CDS:AAC39892 AAC39892.1 Homo sapiens (human) RNA polymerase I  
40kD subunit  
AUGUCAAGCAACCCAGUCUCCUUGAAGUCCGAGGUCGGUCUAUCAGAGCAGUGACGUGUCUUAAC

UGC UUUGACAU

>EMBL\_CDS:CAB23081 CAB23081.1 Homo sapiens (human) hypothetical protein  
AGUAGACACCCCCUGUGUCCCCGCCGGAGUCUCAGUGGGCAUCGCCCCUACCCCGUCGGAGUCAC  
AGUGGGUUCACC

>EMBL\_CDS:AAC18086 AAC18086.1 Homo sapiens (human) diphthamide biosynthesis protein-2  
CCCCGUGGGAGUAGGACUCAGAAGGGACAUAGACCUGUCGUCCUCCUCUUCCCAACUGGACCACGG  
G

>EMBL\_CDS:AAC79696 AAC79696.1 Homo sapiens (human) MRP6  
CAACUCCUACAACUCUUGACACUCUCAGUGUUUCCGAAAGAGACGUAAGUAUCGUAAGAGCCG

>EMBL\_CDS:AAL86699 AAL86699.1 Homo sapiens (human) alpha 1 type XXI collagen precursor  
CUAGGACCUUGUGGACCACAGGGACGUUAAGGGACUAUAGGUCCGAAUGGUAGAACUGGUCCAAC  
AGGUCCCAUCGGUCCCAAGGGUCCGUCAGGUCCCAG

>EMBL\_CDS:AAQ05538 AAQ05538.1 Homo sapiens (human) Ig heavy chain variable region, VH3  
CCCCGCACAGAAGCCGAAGGUCUGACAAGUCAACGUCUAUGUCAUACAAGGACCUUAAACAGAGAC  
CUCCACCACUUGGCCGGG

>EMBL\_CDS:AAM43838 AAM43838.1 Homo sapiens (human) U-cell activation WD repeat protein  
CUGUUCUUCACCGAGAGAUACCUCUUUACAGUCAGGCCGUUAACGACAUCUCACACGUAAAGAGU  
AAACCAACUAAUUAAAAAACAG

>EMBL\_CDS:AAL67806 AAL67806.2 Homo sapiens (human) esophageal cancer associated  
CUUAAACAAUGUAAAGUCCUACCUACGGAGGUGCAUUUUAGAACCUUACUCAAGGGACUACCUCC  
GUUAGAACUUUUUGGUUAAA

>EMBL\_CDS:AAK27221 AAK27221.1 Homo sapiens (human) junctional adhesion molecule 3  
UAGGCACCCGUCACCAUGUAGUAACGCUAUGGUCGACAUCACUCCGGCCCCCACC GGGAGUGAGA  
GGACCGUCACGUCACAACGGUAGAACGGAUGACCA

>EMBL\_CDS:AAM77566 AAM77566.1 Homo sapiens (human) IL-17D  
CGGGACAAACAGCUACGACCUCAACUACGACAGACGACGAGGAAGAGGCCGAGCCCCUGCGUCCACG

>EMBL\_CDS:AAK74120 AAK74120.3 Homo sapiens (human) mucin 16  
CCAUCUCUCGGACCACUAGUGAAGUCACCUAUACAGAACACUGUAACACCUGACUAGUCCCGAUC  
CAGGAGACGA

>EMBL\_CDS:AAK68033 AAK68033.1 Homo sapiens (human) DNA methyltransferase 2f  
ACGGUUCUCUCCAACCUCUAUUUAUUUGAGAACCAUGACUUUCGGUGUUAAAAGAUACAAACA  
UAGUUCUCCAGAAAGUUAGCAGAACCGU

>EMBL\_CDS:AAP97715 AAP97715.1 Homo sapiens (human) excision repair protein ERCC5  
AAAAGUGAAACCACAGUACUCCUAAUCCAGAAUAGAAACCUAAAAAACUCGAAGUACGGUGGUA  
AGACUCUU

---

>EMBL\_CDS:AAM12641 AAM12641.1 Homo sapiens (human) regulator of G protein signalling 3  
CGGGGUGAACUCCCGAAGGAGACUCCACCCGAACUUACUGAAGUAGUAAAACAGACGGAACGGGC  
GCCCUCCCCG

>EMBL\_CDS:AAK96045 AAK96045.1 Homo sapiens (human) testicular soluble adenylyl cyclase  
CAGAAGUAAAAACAAUUUUGCACCAGUUUCUUUAAGUUCUAGAAAAGAGAAUAAAGAAGUCCUGA  
CGCUAAAAGUCCUUUUUUACGUCUA

>EMBL\_CDS:AAL77058 AAL77058.1 Homo sapiens (human) multivalent protease inhibitor  
AGUCCGUGAGCCGGCGGCCUUUCGGCACGGUAACCCCGACGAGAGACUCCACCGACGUCGGACU

>EMBL\_CDS:AAL08625 AAL08625.1 Homo sapiens (human) hematopoietic zinc finger protein  
CCCCUACCCUCGGUCCGACAAAGAGACCCCUAGGACCCCGACCGGGGUCAGGUAAGAGGUACCU  
UUGACCUGCCCCACGAUGUGGUAGGGG

>EMBL\_CDS:AAL65133 AAL65133.2 Homo sapiens (human) ovarian cancer related tumor marker  
CAACAGUGACUCAGUCGAUCCUGUCUCCUUCUUAAGUACACAUUUGGACUCCAAUGGUGUAA  
CCAGUAGAGGUCAAAGAGACAUAGACAUCACUGAAGUCACCACCG

>EMBL\_CDS:AAL24502 AAL24502.1 Homo sapiens (human) deleted in azoospermia 2  
GUCCGUUGACUAUAGGUCACCACUGGACUUUACCACUUGAACCUAUUCGUCCUUUACGGACUAUU  
AAUUAUUGUCCGUUGACUAUAGGUCACCACUGGACUUUACCACUUGAACCUAUUCGUCCUUUACG  
GACUAUUAUUAUUGUCCGUUGACUAUAGGUCACCACUGGACUUUACCACUUGAACCUAUUCGUC  
CUUUACGGAC

>EMBL\_CDS:AAK27358 AAK27358.1 Homo sapiens (human) Bcl-Rambo  
CCGAAGUCUUUAAAGAAACAGGUCUCUAAAUCGAGAAGAAGUUAAAGUCAAAAUUGAAAAUUUU  
UUUAAAAGAACUAGGUCUCUAACACUUCGA

>EMBL\_CDS:CAC15059 CAC15059.1 Homo sapiens (human) putative protein kinase  
GACCCAACGACCAUGACAUCAACAACUACAACUAGACGGAGUCCAAGAAGUCCAAGAUGAACACA  
UCUUUGACUUCGACUUCACCAUCUUCGUCAUCCAUAACGGCCACGAUCGUCUUC

>EMBL\_CDS:CAC10401 CAC10401.1 Homo sapiens (human) CDC2L5 protein kinase  
UCGUACCCUCCGUUUCCAUUGCCACCAUUAACAUCUCCACUGAUUUUGAUGUACAACGAGGAAGAG  
GAACCGAGGAUACGA

>EMBL\_CDS:CAB65596 CAB65596.1 Homo sapiens (human) peroxisomal branched chain acyl-CoA  
GAAUGACGGUGUACACGGGUCCGGCACCAUCUCGAGGCCCGUCUCCUUCAGCCGACGGGAGAC  
CCGACCUUGGACCGGUCCAGUCCACGCCACUC

>EMBL\_CDS:CAA06213 CAA06213.1 Homo sapiens (human) integral membrane protein, Ump21-I  
CCAGGAACACUUAAGAGGAGUGCCUCCGUGAACGCUCUCAAUUACCCGUCUACCUUCCUCUACCGU  
UCCUGG

---

>EMBL\_CDS:AA062630 AA062630.1 Homo sapiens (human) transforming acidic coiled coil 2,  
CCGUCACGAGUCAGACUCCUCCGGUGUUGAGUUUCAUCGAAGAGGUCCAAAGAGGCCUCGGACG  
ACGAAAGGACCCAGAGGACGUGGUCGCGACGG

>EMBL\_CDS:CAC00640 CAC00640.1 Homo sapiens (human) rhomboid-related protein  
CAGGUCCCCGUCGAGUACCGACACGUGGUCCGGUCACUCCACAGGCGUGGCUACUUCGGACACA  
AGAGCCCCAGGUCGACGACGAGGACCUA

>EMBL\_CDS:CAC34245 CAC34245.1 Homo sapiens (human) U-cell receptor beta chain VJ  
ACGACGACAGAAGUCCCGAGUACAACGAGUGUCAGUCUCAACUCUUAACAAUCCAAACCCGCCAAC  
UACCCUUUGAACAGUUACUGUUUAGGUGAGAGUAUACACCGGAGUCUCGGGACUAAACGUCAACG  
C

>EMBL\_CDS:CAC17609 CAC17609.1 Homo sapiens (human) importin7  
ACCGCUAGAAGAAGACCUUAUCAUAUUCUUUAUAGGGGACCACGACAAAGAGCUAGUCCGGU

>EMBL\_CDS:CAB65100 CAB65100.2 Homo sapiens (human) NICE-4 protein  
CAUCGUUGACUCGAAGCUCAGCUCCGACACUGUCACCUCAACGACGGAUCCGACUCCGGGUCCGA  
UG

>EMBL\_CDS:CAD24023 CAD24023.1 Homo sapiens (human) putative alpha 1,3-fucosyl  
ACACCCGAGACCCGUUGAGUCCACCCAUAGAAGACGGAGGGUAGAAAACCCACCAUUCGGGAAAA  
GGACUUCGGACUAUAAUCGGGUGU

>EMBL\_CDS:CAD58724 CAD58724.1 Homo sapiens (human) NOSURIN protein  
ACGUCAAAGAAGGUAUUGUCGGACCUAUGAAAAAGUUACAGUUAGAACGACUACCGUGUCACUU  
AGACGCACACCGUACACCAGUCCCAAACCGUUUUUCUCUUUAUACAACCGACAUGACCAAUUC  
AAUAACGU

>EMBL\_CDS:CAF25192 CAF25192.1 Homo sapiens (human) Xin A  
CCACCCGGACCCCGGCACCACGACUCCGGUACAACAUCGACCCGACCGAUACAGGUGACCCUG  
UAGACCGGUCUCCAUAACACCGGGACCAGAUGUCAUCACCCUUGGAACCGACCGA

>EMBL\_CDS:BAC04859 BAC04859.1 Homo sapiens (human) hypothetical protein  
AUACAUAACACGUGUCCACGGACACGUACACAUGCACACGCGUAUCUGGACAUACAUGUAGACA  
GAGGUACAUGCAUACAGACACACACCGUGUCUACGCUAUGACGCCACGUAGACGUUAACACACG  
UGUCCACGGACACGUACACAUGUAC

>EMBL\_CDS:BAG53993 BAG53993.1 Homo sapiens (human) hypothetical protein  
CCAAAGGAAUCAACAUAUGUCACGACUUCAUACCAUAGUAUCAUAAAUAUUAUUGACCACUUU  
GG

>EMBL\_CDS:BAC85326 BAC85326.1 Homo sapiens (human) hypothetical protein  
CCGGGACAGAGGGUUGGGAACAUGGUCACGACCCGAGUCUGGGACCAUGUCCGGACCCCUGUCC  
CUGG

>EMBL\_CDS:BAB55198 BAB55198.1 Homo sapiens (human) hypothetical protein

CAGUGACUGAGCCCCAAACCCAUCGAGGAGUAAAAGGCUUAGUGACCGGACCAAGGAACCCCUA  
GGAGUGAAAGGCUUAGUGACUAAGCCCCAAACCCUUCGAGAAGUAAAAGACUCAGUGACCG  
>EMBL\_CDS: BAB15388 BAB15388.1 Homo sapiens (human) hypothetical  
protein  
CGACCACAACGUCCCGAAGAGCACACAUACGACGACGUCGGAGACCCGACCGUGGUCGUGGUCCG  
ACUCGGACAGGAACCCGUGGUCGUCGAAGGUCCUCUUCAGUACGUCGAGGUGUCCG  
>EMBL\_CDS: BAC11516 BAC11516.1 Homo sapiens (human) hypothetical  
protein  
CCCACUCCGCGGGAACAUGUGUGACAACGAGUCGCGGAGAGGCGCGACGUCGACCUUCUUCGACA  
ACUCUAUCGACCUCACGUCCCCGUCGCGG  
>EMBL\_CDS: BAG53483 BAG53483.1 Homo sapiens (human) hypothetical  
protein  
UACAUUGAGUCUCGUCAGAGGUUCAAUGAUGGAAGAAGACUCCCAAACCUAAAACACUAGAGAC  
GACCUGUUCAACGUA  
>EMBL\_CDS: BAG52312 BAG52312.1 Homo sapiens (human) hypothetical  
protein  
CCCUCUUCAGUCCACCAGGGACGAGGACUGUGAAGACACCUCCUACCGCCCCUACCGUGGUAGA  
GGA  
>EMBL\_CDS: BAG51468 BAG51468.1 Homo sapiens (human) hypothetical  
protein  
CCUCGAGGGACCCUCACGGGGUCUGGGUUGGGUCGGUAGUGACCCCGAGACCCCUUGUGACAACGG  
ACCCUGACCCGAGG  
>EMBL\_CDS: BAC87399 BAC87399.1 Homo sapiens (human) hypothetical  
protein  
CGGAAAAGGUGUAAGUGAUGUAUAUAUUCGAAAAGAGGACAUACUCAAAGACUACACAUCACU  
CUGACUUGAAACAUCUCUCCG  
>EMBL\_CDS: BAG54552 BAG54552.1 Homo sapiens (human) hypothetical  
protein  
AACGAUGAGGUACCCACCUAAAAGUACCGCUGCGGAACAAUAGAACCAAUAACAACGGUAUCCU  
GAAAGGUUUCGUGGUGUACCAAACCAU  
>EMBL\_CDS: BAG51912 BAG51912.1 Homo sapiens (human) hypothetical  
protein  
CCCCUCUCUAGUAACCGUCGUUCUAACGCCGUUGUCGGUCAGACUUCGUUGCGAUCACAGAAAGG  
GG  
>EMBL\_CDS: BAB15349 BAB15349.1 Homo sapiens (human) hypothetical  
protein  
CCGAGGGACCAGUUGAACCCUACGGGUCUGGUGACACCCGACCCCUUGGUAGCCCCUCGG  
>EMBL\_CDS: BAB14766 BAB14766.1 Homo sapiens (human) hypothetical  
protein  
CAGGAGGAGGUCAUGGACCUACAUCCCCGACGAGGACAGGUCGAAGGGGAGGACCUGCCUCCGGA  
GGUCGAGGACGUGGGCCCCGACCUCGUCCG  
>EMBL\_CDS: BAB15157 BAB15157.1 Homo sapiens (human) hypothetical  
protein  
CGCACACACACAGUACACACGUCAUCUUCGAGUAUGCAGAGAGACGACACGUAUGUGCACACA

---

>EMBL\_CDS:BAC86835 BAC86835.1 Homo sapiens (human) hypothetical protein  
UUCGUACCCCAUAGGACGUAUAAAUAUUCGACAUUUAGAAGAAUACUGCCAACUUCUCCUACG  
AGACACAAA

>EMBL\_CDS:BAG53471 BAG53471.1 Homo sapiens (human) hypothetical protein  
GAACGGCACUUACCGCGGCUGGUACGCGAGUUAGAGGAAUCCCCUCUGUCCGGAGUAGGACGAGA  
CGAGGACCUCUCCAACCACUGCACGCACCACUUGAGUGCUGUCC

>EMBL\_CDS:BAC86126 BAC86126.1 Homo sapiens (human) hypothetical protein  
AACCACGUAGGGAGCCAAAAGGACCGGUCCCGUUACCGACGCUACGGACCAUCCGUCUACCGACC  
GGGCUACCGGUCCUCCCCUACAAAGGGUU

>EMBL\_CDS:BAG51766 BAG51766.1 Homo sapiens (human) hypothetical protein  
UUAUAACGUAAGAGGAGGAUUAAGGUGGGUCCCGUGACACUCCUAUCUGGAAGGUAUCGGUAACC  
CCUACACUCUUAACAUUACAA

>EMBL\_CDS:BAC87609 BAC87609.1 Homo sapiens (human) hypothetical protein  
CCUCUACGUCGGCCUCCUUCUCGACCCGGGCCUCCCCCGGGCCUCCGACGUUCACCCAGACU  
CUCCGGUUGAACUCCUCCGGACCGGAGACGGAGGGCGUAACGGGUCGACAAGGAGGACCGACGUA  
GAGG

>EMBL\_CDS:BAG51223 BAG51223.1 Homo sapiens (human) hypothetical protein  
GUCUCGUCAUUCUUCUGUUGGUAGAGACUCAGAGGUCUCGAGGAGAGACGUCCUCCAGACCCA  
GGAGCCCGUGACCCUGGAGCGAGAGGACGUCCAGACCUCGAGGAGAAGGACCACACCUGCGACG  
AGAC

>EMBL\_CDS:BAB70820 BAB70820.1 Homo sapiens (human) hypothetical protein  
AAGACCCUAUGUAAGACCAACAUUACACGGGUGACUACAAAGAUUCCACCUGUCUACGUAAA  
CGUGGCCUAUAGAAGUCUU

>EMBL\_CDS:BAA92130 BAA92130.1 Homo sapiens (human) hypothetical protein  
UCUUCAACUCCCAUUUUGUACAAGUAGUAAAAACAGAUUCAGUGAUUGUCUACAAUUCUACCGU  
UUACAAGUGGGAGUUAGAGA

>EMBL\_CDS:BAG54675 BAG54675.1 Homo sapiens (human) hypothetical protein  
AGGAGGUCCCUGUCCUAUAGUGAGAAGAGGAAGAGACCGACCCGUCGUCAAACGCCUUGUGUAA  
GGACACAGGCACCCGACGUCGGACCGACUUUCUCAAGUAUAGUGGGACCCCC

>EMBL\_CDS:BAD18708 BAD18708.1 Homo sapiens (human) FLJ00261 protein  
CUCCUCUGGUCCCGAAGGCUCGACGGCGCCUCUCGAUCCGGGCCACAGAGCCUGUCCGAGAG  
GUCGGCGACGACCGAGACCUAGAGGAA

>EMBL\_CDS:BAC11282 BAC11282.1 Homo sapiens (human) hypothetical protein  
CCGAGGUUCACGACGACUCCAACCUCGUGUCCCUUACCCUCCUCCGUGUCCGGAACUCCGUCCAC

GGUGGGACCCGGGCGACGUCGACUUGGAGGUCGUCUCGGAACCACGG  
>EMBL\_CDS:BAG54709 BAG54709.1 Homo sapiens (human) hypothetical  
protein  
ACAGUGAGGCUCGACCUCCGUCCCCACGUGGGUGGAAUCCUCCUCCAACAGGCACCGUCAGAGG  
UCCUUGACCCCGUGACGACCGAGGUCCUACCCCCACCGU  
>EMBL\_CDS:BAC05039 BAC05039.1 Homo sapiens (human) hypothetical  
protein  
AGUCUCGACGGUCAAUUCUACCAAGGGAACUCCAACUUCUUUAGAAACUUUAAAAGUGGAAG  
UACUGGAAGGUCAAACCGUUACGUAAAAGAACACCGUCGUGACU  
>EMBL\_CDS:BAB15527 BAB15527.1 Homo sapiens (human) hypothetical  
protein  
UUGAAGUGUCCUACUAAACCGACGACGGUCCUGUCAGACCUUCACUUGUCCGAAAAGGCCUUC  
ACGACCGCACCGAAAGUCUAUCUCGAGUAUAACCAUCAUUGGGUUCAGUCACAACACGUUUCAA  
>EMBL\_CDS:BAB15113 BAB15113.1 Homo sapiens (human) hypothetical  
protein  
ACCCCGACGUCCGUAACAGACCCACUCGGAGGUGUCCUUGGGGACCUCGGGAGGACCGAGUUC  
CAUCGGGGU  
>EMBL\_CDS:BAG53044 BAG53044.1 Homo sapiens (human) hypothetical  
protein  
CUCGUCAGAAUUACGUCUAAACUGGUUAAAUCACCCUGUGUAAUACAAAACCGAGUGAUUUCCA  
UAACAAAGUACUUAACCGACAAG  
>EMBL\_CDS:BAC04529 BAC04529.1 Homo sapiens (human) hypothetical  
protein  
GUUUGAAAGGAGUAUAAGUCUUGAAAGUAUCCUAAAGAGAGGACACACGUAAAAGACCACAUU  
AUUCCAAAC  
>EMBL\_CDS:BAG54259 BAG54259.1 Homo sapiens (human) hypothetical  
protein  
UCGACCCUCCAGUCCAUCCGCUACCACGACCGGGCGACGAGGUCGAGCGAUCUGUCGUCCCAGUC  
GAACACUGAGAACC GGAAGUCGA  
>EMBL\_CDS:BAD18751 BAD18751.1 Homo sapiens (human) hypothetical  
protein  
CCUGGGUCUCCGUAGGGACGGGUCUGUAGGUGUGAGUCGAGUCCCAAGACACCGGACACACCCU  
UAACAGACGUCGACCCCUACGUCGGGCAGG  
>EMBL\_CDS:BAD96865 BAD96865.1 Homo sapiens (human) solute carrier  
family 27 (fatty acid  
AGUGCCAGUAAACCAAAGACACCACUCAACGUUUUAUGGCUUCGUCAAGUGGCUAUAUGACUUA  
CUGUCACU  
>EMBL\_CDS:BAD96221 BAD96221.1 Homo sapiens (human) hypothetical  
protein FLJ11848  
GACUUCGACAUUGGAGACCCUACGGUAGAUCGGUUAAGGAACUGUUCAGUCCGACGGUAUGUUU  
CUACCAAAGGGACCCCUACUGUCGAGUC  
>EMBL\_CDS:BAD97219 BAD97219.1 Homo sapiens (human) monoamine oxidase  
A variant  
GACCAGUUGCACUCACUGUCCUACCAAGUCGAAGUGAACCAGAGGCUCCUCCAGGUAAUAGGCAA

GCGAGUGAACUGGUC

>EMBL\_CDS:BAD97254 BAD97254.1 Homo sapiens (human) tektin 3 variant  
AGGUCAGACCAGACUCGGUGGAAGUCCUUCGGUCAGAACAGGAACUACCGGAAGAACUACCUAAG  
AUACCAGUAAAGUCAGACCU

>EMBL\_CDS:BAD96196 BAD96196.1 Homo sapiens (human) aspartyl-tRNA  
synthetase variant

AACCCAGUCCGUACCAUAUCUUUCCAGAAUGUCGGUUACCUAUAAAUAGUUCUUAUUAUUUUAGA  
CAUAGUAUGAAAAGGAAAUGGUUUACUGGGUU

>EMBL\_CDS:BAD97122 BAD97122.1 Homo sapiens (human) sarcosine  
dehydrogenase variant

CGGGGUGAGUACGGGUCGAACCGGUCCACCAUGUCCAGACCGUCGGGUUCGACGGAGGUGGUUA  
CUGGUGGUGCAACCGGCACGACCCGUCCTCCG

>EMBL\_CDS:BAD96931 BAD96931.1 Homo sapiens (human) carbohydrate  
(chondroitin 4)

GUCGACGACGGAGGUCCGGUCCCCUAGAACCAGCUUGGUCAGGAGGGGUCGACGACCGCCAGG  
ACAAGGCCAUCGAGCCCCCUUCGCCUCGACGGCCAGGUGGACCUCAUCGACGUCGUCGAC

>EMBL\_CDS:BAD96995 BAD96995.1 Homo sapiens (human) AU rich  
interactive domain 1A

CGUGUCCCCGUCUCCUGGUUAUACCCCGACCGCACACGGUACCCUCCGGUGCUCGGAAGCACC  
AACCGGGAGACUAGACACACG

>EMBL\_CDS:BAD97289 BAD97289.1 Homo sapiens (human) Na<sup>+</sup>/K<sup>+</sup>-ATPase  
alpha 3 subunit variant

CCCCCGUGGGAAGUAGUGGUCGUCCAUAGCCAACAGCAACCCAGGAGCCAGAGUACCUACCUCU  
CGACCAUAAACAACCACCUUAACUUCUUUAGAG

>EMBL\_CDS:BAD96814 BAD96814.1 Homo sapiens (human)  
aminopeptidase-like 1 variant

GUAGACCCACACCGACUCCUGCCGGUCCCGACCCCUACGUCCCGCCGAAACGGUUGGGGUAUC  
UAAGGAGGUUUAGGAGAGCAGAAGUCAAGGAGUAGGGCCUAC

>EMBL\_CDS:BAD97332 BAD97332.1 Homo sapiens (human) pinin, desmosome  
associated protein

CCGACCCUGACCUCAUGACCAACCCUGACCCUAACUUCGACUUCGACCCCGACUCUGACUCCGAC  
UCCAACUCGGUGUCCGAGUCCAACCCCGAGUCUAAGAAAAAGAAGAAAAGGAGUCUGAGGAAAA  
GGUACAG

>EMBL\_CDS:BAD96423 BAD96423.1 Homo sapiens (human)  
calcium/calmodulin-dependent

CAACCGUCUGGGUGCCCACGAAGUCCCGGAGUACCCGACACUACGCGAACCGUCCCAACUACCAG  
UCG

>EMBL\_CDS:BAD96332 BAD96332.1 Homo sapiens (human) PHD finger protein  
10 isoform a

GACCGAAGUUGAAAGACUCAUAAGACAACAACGUAAAACCCUUAUGAGAAAUAUUACCAGACAUUA  
AGCAACUGCAAGAAAAAGAACAUCUUAUUGUCUUAUGAGUCGUACAAACCGACC

>EMBL\_CDS:BAD97166 BAD97166.1 Homo sapiens (human) piggyBac  
transposable element

GGACCAUCGUCUUCACGGCUUCGCGUCCGCCGUUAGAGGACUCACACCCUCGACGGGAGGACA



CUCAACGUGUGGACGAGGGUCC  
>EMBL\_CDS:BAD97228 BAD97228.1 Homo sapiens (human) phosphoserine phosphatase variant  
GGUCGAGGGAAUACGGCCCCAGUCCACACCCCCAACGAGACGAUACUCAGAGACGUGGACGAGG  
GACCUCCCCGACC  
>EMBL\_CDS:BAD96811 BAD96811.1 Homo sapiens (human) galactosidase, beta 1 variant  
AGGUCUGGACCGGGACCAGGUAGGUCCUUGACCUAUUUCACAGGACCCCCGUUCAGACCC  
>EMBL\_CDS:BAD96436 BAD96436.1 Homo sapiens (human) RNA binding motif protein 28 variant  
CGGGUGGUCGGAGUAAGAGACCUCUUCGUCGAUCUUCGGUAAAGACUCGACGAAGAACUCAGUAC  
UUGACCCG  
>EMBL\_CDS:BAD96821 BAD96821.1 Homo sapiens (human) carcinoembryonic antigen-related cell  
UGACACUAGCAGCACUGACACCAGGAUAACUCCGGUCACAGACUCAUACCCGAACCGUGCAUUA  
CCUAGGUGUAUAUAAGUGUCA  
>EMBL\_CDS:BAD96726 BAD96726.1 Homo sapiens (human) 2',5'-oligoadenylate synthetase 1,  
ACCCCAAAAUUUCAGUAUUAUGAAACAGGUCAUCUACGUCUCAACGACCAUCAAUACUGAUUA  
AGGU  
>EMBL\_CDS:BAD97042 BAD97042.1 Homo sapiens (human) splicing factor 3b, subunit 4 variant  
CUGUAGGGACCUACCCCGUAGGGUGGGCCACCCUUACCCACUCCUACACUCACAGGUACUGGUCC  
UACAG  
>EMBL\_CDS:BAD97300 BAD97300.1 Homo sapiens (human) DKFZP586B1621 protein variant  
GAGGACCUAACGAGACCGGCGUGCCGACACCCACCACGGUGUCAGCGGCAGUGGUCGUCGGGCCA  
GGUCCCGUAAGUCCAC  
>EMBL\_CDS:BAD97305 BAD97305.1 Homo sapiens (human) glycine amidinotransferase  
UCCUCUACUUAUACGUGAGACAUCAGACCUCGUUCUACGGAUUGCGUAGGUAAGUUACGGAUCCAUC  
AAACAUUGGACCGAAGAGACACGUUUUUUAUAGAGAA  
>EMBL\_CDS:BAD96710 BAD96710.1 Homo sapiens (human) RAN binding protein 3 isoform  
AGAGACAGUCUUAGAAGAGGGCGGAAGUCCUGACCUCGGCGGUCGACUGGAGGGACGGUCAAGAGC  
GCCUUUUCUCCUUCGACCCGAAGUCCUCGCCCUCGCUCCUCACGACCGACUCC  
>EMBL\_CDS:BAD96976 BAD96976.1 Homo sapiens (human) nibrin variant  
UCGAAAAAACCUUCGUAGAGUGAUAGUAGGACUCAAACAGUAACAAUCUAUAAAGAAAUCGACU  
GGUAUCACUCAGAAGGAACUCAA  
>EMBL\_CDS:BAD96686 BAD96686.1 Homo sapiens (human) PDZ and LIM domain 3 variant  
ACCUGAGACAGGGUUUCGGCAGUUAUCGGUCCUACUGUAGAGGUCCUGUGUCCAACCGUCGACGG  
CGGAACGAAGGACCACAUUAGGACCACUACUGGUUUCGACCAACUUCAGAU  
>EMBL\_CDS:BAD96624 BAD96624.1 Homo sapiens (human) connector enhancer

of kinase

CCGAAACGUCCAAGAGACAGACAUCGGACCUCGAGUCCCGACCUCGACAAGGUGGGGCGGGUCC  
UACUCGAGGACCACAGGGUCUCUGGCGUGUCGG

>EMBL\_CDS:BAD97292 BAD97292.1 Homo sapiens (human) inositol  
hexaphosphate kinase 3

CCCAACUUCGAGAAGGAGAGUUGGACCAAAGGCGACCACAGAAGGUGGUCGCUCUUCGACCUCA  
CAACUCCACCCCGAGCCUGGA

>EMBL\_CDS:BAD97230 BAD97230.1 Homo sapiens (human) cytochrome P450,  
family 2,

UUGUCAUUUAAGUCUGACAACUAACACGAAAAGGACAAGGUAAAACUAGUCCUUUGUUAGUUAAU  
UCAGGGCUCGUGACAA

>EMBL\_CDS:BAD97047 BAD97047.1 Homo sapiens (human) integral membrane  
protein 2A

AGGACCCACCGUUGAGCCUCGAGGAACGGCCAGUCAUAGACUCAAGACUGGCACGCCGAGUCCU

>EMBL\_CDS:BAD97004 BAD97004.1 Homo sapiens (human) mutS homolog 2  
variant

GGUGACCAAUUGUUCAGAAACAGGAACUCCCCAAAUGUGAAUAAGUCGUUCCGUCGGUCUCUGA  
CUCUCGGUCACC

>EMBL\_CDS:BAD96438 BAD96438.1 Homo sapiens (human) fibroblast growth  
factor receptor 1

CGUCCUCUACUCCUUCGGGGACACGUUAUCUACUACUAGAGGUCCAUGUCCCCGCUCCAGUAGU  
GACG

>EMBL\_CDS:BAF82658 BAF82658.1 Homo sapiens (human) hypothetical  
protein

AGUUUCCGUCACACCAGCCGGACCUUUAUGGUAGAGGGAGUCCUCAGGAACGGGAAAGUGAGACA  
GAAACU

>EMBL\_CDS:BAF83734 BAF83734.1 Homo sapiens (human) hypothetical  
protein

GUCGCAGACUAACCGACCAGGGACCUCCUACUGUCCUCCGUCGGGUAGGUUUCUCCGAGGAAA  
AGAGGUCGUCCCGGAACCGGUCCUACGAC

>EMBL\_CDS:BAF83800 BAF83800.1 Homo sapiens (human) hypothetical  
protein

GCCUAGGAGGACCCUCCUCUACACAGACUCAGUACUGCUCGGGGAGACUCCCCUCUCCUAGGCC  
CCACAGUACUGCCCGGGAGGAUCCUCUACCUAGGC

>EMBL\_CDS:BAF83741 BAF83741.1 Homo sapiens (human) hypothetical  
protein

GGUCACUCCUCCACCCACUCUACCAUGGUCGACUACCGUGUAUCAGGUUCGGGACGCAUCGAAGU  
CAUGCCCUCCUCCUACGAACACUGACACAGUUCGUCGUCCUCCGAGAACGGACAGAGGAGACA  
GACC

>EMBL\_CDS:BAF82320 BAF82320.1 Homo sapiens (human) hypothetical  
protein

AAAUUCGGUUC AAGGUGUUUCGUAAGAAAGUUAAGUCCUACAGAAAUGAAAGUCACCUUGAAC  
UUAAUUU

>EMBL\_CDS:BAF83693 BAF83693.1 Homo sapiens (human) hypothetical

protein

AGACCAACCCGGAACGGCCCCGUGAGACCGAAGGCCUCCGAGACCUCGGGUUCACGGACUCUUC  
AAGGUCU

>EMBL\_CDS:BAF83474 BAF83474.1 Homo sapiens (human) hypothetical  
protein

GGCGGUACAAGUGUCCUGAACCCGGAACGCCCGGUAGUCUGUGAGCAGGUCCAGGACCACCGU  
CCACC

>EMBL\_CDS:BAF82652 BAF82652.1 Homo sapiens (human) hypothetical  
protein

CCCAACAGACACUAUUUACCUUAGACCUCUGAAGUGGAAGUAAAAGUGUAAAACGUUGUCUUGG  
A

>EMBL\_CDS:BAF82401 BAF82401.1 Homo sapiens (human) hypothetical  
protein

ACAUCUCUUCGACUUCGGCCAUCACUUAAGGCAAUAACCAGAAAAGCGACAACCGAAGAAAAAGG  
AAGAGGUGC

>EMBL\_CDS:BAF82503 BAF82503.1 Homo sapiens (human) hypothetical  
protein

CGGUAACGACCGAGAGAGAGGACCCAUACAGGUUCCUAGGCACUCUGGUGACCCACUCCCGGUA  
GCCACCG

>EMBL\_CDS:BAF82429 BAF82429.1 Homo sapiens (human) hypothetical  
protein

UUAGACCGGUACAAGAAACUCCUCUCAAACUACAUCCUCAAGAAUGAUGAGACCUUACCCGGUC  
CAA

>EMBL\_CDS:BAF82111 BAF82111.1 Homo sapiens (human) hypothetical  
protein

CGCAGAUAGUAUAAACCAAAACUACUAAGUAGUCCUAAUAUUCACUCAACCUAACGAAAAUAGUC  
GACAAACUGAAGACUACAAAACAAAAGUUGAACUACAUCUACA

>EMBL\_CDS:BAF83032 BAF83032.1 Homo sapiens (human) hypothetical  
protein

AGAGGAAAGAGGCAACGGUCAAGGAGGUAGAGACCACAACCGAGUAGAAGGUCCUCCCUAACCA  
UCUACCCACCUCU

>EMBL\_CDS:BAF83617 BAF83617.1 Homo sapiens (human) hypothetical  
protein

CCUUCGACUCCAGAAGCACCACUJACCGGAGCAUUAGUAUGUCCCGUUGGUGCUACUACAGGAGU  
CUCGG

>EMBL\_CDS:BAF83614 BAF83614.1 Homo sapiens (human) hypothetical  
protein

AGUGUUUAUGGUCCUCGUACAUCACCAAGGAGAACACCCUCGGCUACUUGUGACGGUAUAACGAC  
AACCAUCCACU

>EMBL\_CDS:BAF82421 BAF82421.1 Homo sapiens (human) hypothetical  
protein

UCAGGUUUCUUGACAUAAGAUCUCCAGUAAGAAUAUCUGUCAACUUCUAUCAAGGGACAAUCC  
AUCUCAAGAAACCUGA

>EMBL\_CDS:BAF82282 BAF82282.1 Homo sapiens (human) hypothetical

protein

CGGACCCCUACCGGCUCUUACCCGUCAACUGACCUUCUAAAUCGUCGACGAGGGACGCCGGCC  
CCGUCCG

>EMBL\_CDS:BAF82871 BAF82871.1 Homo sapiens (human) hypothetical  
protein

CCUGACGAAACGUACGACUCUCACGACGAAGAAGAGGUCCCGACAGUCGUACGGGGGUUCAGG

>EMBL\_CDS:BAF82241 BAF82241.1 Homo sapiens (human) hypothetical  
protein

GAACACCUGUAACGUACACCGGACCUCGACCCACCUUUGGGUCAGGUACAAGGCCAGUACUAGUU  
ACACGUACCC

>EMBL\_CDS:BAF83705 BAF83705.1 Homo sapiens (human) hypothetical  
protein

GCGUCGGUUCAGGAAUACGUGUUUCGCCAACAACCUGUCCACGAGGUACGGGUCCCGAUGGACCC  
ACGUAUCCCGUGGAAGACGAACCACGACUCCCCGACAC

>EMBL\_CDS:BAF82092 BAF82092.1 Homo sapiens (human) hypothetical  
protein

AAGGUAUUUAGGACACGAGGACCUGUACCUCGCCUCCUACUUGAGCUGACGUAAGAGUUACUAGA  
GACACGGGUCCUCCGAAUCCUAAAACCCUU

>EMBL\_CDS:BAF83622 BAF83622.1 Homo sapiens (human) hypothetical  
protein

CUCCUACUAAAACGUCGCACCUAAGACGGAACCUUCUACACAAAAAGUAGAAACCUCCAUAUUA  
GGAAGACGUUCAAAAAGAAAUAAAUCAGAAG

>EMBL\_CDS:BAF82365 BAF82365.1 Homo sapiens (human) hypothetical  
protein

AGGAAUUUCUGACCCACCAACAGUAAACAUAGUCAUUGUGAAUGAACGUUUUAUCGUCAUGACCU  
AGAAACUCCU

>EMBL\_CDS:BAF83187 BAF83187.1 Homo sapiens (human) hypothetical  
protein

ACUACCAAAAACGACCUUGUGACCUCAAACAAACUCAGAACCACGACGACCUUCGUUAUUUCCG  
AACCCGACUUAACCUCCAAAACUUAAGUGGACUAAAAAAAAAGAAACCUCAGUCAGGUAAAAGUCA  
GAACAAGGAUCUUGGUCACUGUCCGAAUAGAAGGAAGUCACCGAGGCCACUUCUCUCUGAUAAU

>EMBL\_CDS:BAF83448 BAF83448.1 Homo sapiens (human) hypothetical  
protein

UCUUGUCACGUCUCCCAAGGGGCGUCCUGGUCUAGGACAUUCCUCUCCGGGACGUGUCAAAA

>EMBL\_CDS:BAF82979 BAF82979.1 Homo sapiens (human) hypothetical  
protein

GUCUCUCAGCUACUUCUCUACUACCUCGCGAGCACCCUCGUGAAGUGAUCGACCAGGUGUAGAG  
GUUCAGGAGAGAGAC

>EMBL\_CDS:BAF83152 BAF83152.1 Homo sapiens (human) hypothetical  
protein

AAGGUCCAGUCUAGACAUAGACAUGUCUCAAGUUGAUCUCAUCUACUCGGAGAACAUGUCCAA  
AAAGUUACGCCUAUAAGACCUU

>EMBL\_CDS:BAF83331 BAF83331.1 Homo sapiens (human) hypothetical  
protein

CGUUAAGACCCUCGACGGAAUAAAACAACAGUGCGUCCUGUUCGAGAGCUUCAACUCCGUCAAAA  
GCCUUACG

>EMBL\_CDS:BAF83608 BAF83608.1 Homo sapiens (human) hypothetical  
protein

CCCUAGGCACAUUAGGUCCCACGACAAAAGAAAAGAGAUUUGUCUGCCAUGAGGACCCAGAGGUC  
CUAGGG

>EMBL\_CDS:BAF82394 BAF82394.1 Homo sapiens (human) hypothetical  
protein

AAGACGUCGAAGGUCUACGAGGUCGACAGUCACCGCUGUGACAACUGCCAGAGCGAGUACUCCCG  
CUACUCGUACAACUCGUCGUCCU

>EMBL\_CDS:BAF82417 BAF82417.1 Homo sapiens (human) hypothetical  
protein

ACCACGCAAGUCUUGAUGACCGACUACACGAACGUUAGACCGGUCAUAGACGACUCGAGUGAU

>EMBL\_CDS:BAF82583 BAF82583.1 Homo sapiens (human) hypothetical  
protein

CGGUCACUCUGUCUCCCCUGUCGCUCCCGACACCUCGGUCUAGAUGUCAGUUUAGGGUAAAGUGA  
CCG

>EMBL\_CDS:BAF82265 BAF82265.1 Homo sapiens (human) hypothetical  
protein

CACGACGAGUCGCGGCCGACGGGGGUCAGGGUGUCAAGAUACCCUUGGUUCAUCCCCCGUACCGC  
CCCACCUCGUCCCG

>EMBL\_CDS:BAF82223 BAF82223.1 Homo sapiens (human) hypothetical  
protein

CCUGGAGACACGGUAGGAAGAGCUACUCGCGGGCGUGUUUCCAGUCGCUGACGAGCUCCCGUACC  
CACAGGGACCUCGUCCACAGGUCUACGCCCGCGGGUCGCACUACAUCUGUCGUCCAGG

>EMBL\_CDS:BAF82500 BAF82500.1 Homo sapiens (human) hypothetical  
protein

AGGAGAAGUAGCCCAAGGGGUCAGGAGACGACGACCAACUUGAACGUGGCCGUAGAAGACGAGUC  
GUGCUACUCCUACGGGUCCUACUUCUCCU

>EMBL\_CDS:BAF83533 BAF83533.1 Homo sapiens (human) hypothetical  
protein

CAGAAGUCCUACUUCGACGUCUCGACCCCUUGGAGGUCGAGUUGGAACGUCAACUAGGACCACCG

>EMBL\_CDS:BAF82409 BAF82409.1 Homo sapiens (human) hypothetical  
protein

CCGCGACCGACGUCUACUUCUACAGGACCACCCUCCUACCCGGGACACCGGCUCCAAGAAGAAA  
GAUCUCUAAGGACUGCGACGACGACCACGA

>EMBL\_CDS:BAF82680 BAF82680.1 Homo sapiens (human) hypothetical  
protein

CCAGAACGUCGGUCAACUCCUCGAGAGCCAGAACCACCCCGCUCCGAAACCGAGGCGCUCUAC  
CGGCCAGUAAGGGAACCUUCGACGACUGA

>EMBL\_CDS:BAF82658 BAF82658.1 Homo sapiens (human) hypothetical  
protein

UGACUGUCUGGCCAUCCAGACAUACCAGAGAUCGACCAGAUUUGUGGUCAGAUUAAGGAGGUCGC  
AAAGGUAACGAUUA AAAACUAUUCUAAGAAGAACACCCAACUGAGACCUCUGUCCUCCGACUGAU

---

CGUCGACCCUGGAGAACAUCUACAUGGUACUCCAAACAGUCA  
>EMBL\_CDS:BAF83039 BAF83039.1 Homo sapiens (human) hypothetical  
protein  
CCGUAAGGAGGAACACCUCUCAGACAGACGCGCGACGACCAUGGCUUUCGUCAAAAAACACAC  
GUGGAACGCCACGAGUUAUCUGAAAGAAUAAACCUUUAUCCUUCGG  
>EMBL\_CDS:BAF82999 BAF82999.1 Homo sapiens (human) hypothetical  
protein  
GUCAGGUCUAGAAGUCCAAGAAGGACCCAUCUGACUCUCGACUCAGGACCUUCCGAGGACCCUA  
CCCUGAC  
>EMBL\_CDS:BAF82997 BAF82997.1 Homo sapiens (human) hypothetical  
protein  
CUUCUAUGACAACAGGGUGGUUGAACUCCAUAAGGAGUACCUA AACACCGUUAUCACAAGAG  
>EMBL\_CDS:BAF82867 BAF82867.1 Homo sapiens (human) hypothetical  
protein  
GACCUCCACCCCGGCCACUCCUGACGACCCGGAGAGCCAAAACCCUGUCCACGUCGGGUAACCGA  
CAGUCGUCACGACGUAAGAGGAAAUCUAUUGGUGGUCACCAUGGAGAAGGAGGAGUGACCGGUG  
GAAGAGGUC  
>EMBL\_CDS:BAF82568 BAF82568.1 Homo sapiens (human) hypothetical  
protein  
UCACGAAGUAGGUCUCCGAGUCAUCCACCCGGGACCACUCGUAGACGGAGUCCGCGUGCGCCAG  
CCGCCUACGAGACCGGUCCCGGAGGAAGAGGUACCGGAAGACGUCGUCGUGA  
>EMBL\_CDS:BAF82458 BAF82458.1 Homo sapiens (human) hypothetical  
protein  
CCCCGCCCCUCAGGACUCGGUACGGAGGGUACUACUCGUCCUCGUCGUCUCCGUCCCUUGGGGAC  
GGGG  
>EMBL\_CDS:BAF83157 BAF83157.1 Homo sapiens (human) hypothetical  
protein  
CCUGAGAGACCGAGACGUAGUGGAAAGAAACCUAUAACACAGGUCCCCUAUGUUCGACUCUCAG  
G  
>EMBL\_CDS:BAF82714 BAF82714.1 Homo sapiens (human) hypothetical  
protein  
UAGACCUUUGAGACACAUCUACCUC CGCACUCCACCGUGUCCUCGGCGUGUAGCAGGAGGACCG  
UCCGGAAGUACAGGUAGUAGUCCGUCCACACGUCUA  
>EMBL\_CDS:BAF82285 BAF82285.1 Homo sapiens (human) hypothetical  
protein  
CCGACUUCGGGGUCCAACUACAAGGGUAACCGGGACCUC CGACACCUGAACCCCGGGGUCGA  
>EMBL\_CDS:BAF83711 BAF83711.1 Homo sapiens (human) hypothetical  
protein  
CCGUCGAUCCCUUUCGUCGAGGUUUUAUAGGUAACCAACGUCGUCAUCGUCGUCGGUCCGAUG  
GAUUACGUUUACAGGGGCGGCAUGGUGGUCGACACGACGGUGACCGACUCCGAAGUGACCGUAUC  
CACCGGUUAUUUAACCGACGACGACGACGCCAACCGUGACCGUCGACGACGUCGGUUUCGGGG  
ACAACGACGA  
>EMBL\_CDS:BAF82494 BAF82494.1 Homo sapiens (human) hypothetical  
protein

CGAAAGGAGAACGGGGCCAAGAACGAUCAGUACAAAAAGGACCUGACUAGUAGUCAUAGAAAUGA  
ACCACAUCAGACCCUGUUUCUACCUGAACAUUUCCCAGAGGUCUCCUUUCA

>EMBL\_CDS:BAF83528 BAF83528.1 Homo sapiens (human) hypothetical  
protein

AACUUCUUUUUUUGCACAGUCUCGGUUGGCAGAAUCACCGAAGUCAAUACGCCAUGUUAUGUUU  
GACCAACAAUGAAACCAAACUGACAAUAUAAAGAAGUC

>EMBL\_CDS:BAF83123 BAF83123.1 Homo sapiens (human) hypothetical  
protein

CGACCUCUAGACUCUACUCGCACGACCGUAGGACGGAGACGACCUGGUCGACCAGACAUCGACGA  
CGGUCCAACAGGUCGUGUAAGUGGAGUGGAAGGAGGUCG

>EMBL\_CDS:BAF82992 BAF82992.1 Homo sapiens (human) hypothetical  
protein

AGUAACACCAAAGGUACUUGAAGAAGACCUUAAGGACUAAAAGUAGGAACUCCUCACGAGGUAC  
UUCUAACGUUACC

>EMBL\_CDS:BAF83005 BAF83005.1 Homo sapiens (human) hypothetical  
protein

CUACCGAGAAAGUAGUUAACAUAAGACCAAGUCUAUUCAACUAGUAAAACGUUUUCUCCUACGGUA  
G

>EMBL\_CDS:BAF83714 BAF83714.1 Homo sapiens (human) hypothetical  
protein

CCUAGAACUAAAAUUUUUGAACUGAGAACCAGAAAACUCUCAGGUCAACGGUUCAAUGAAACAAA  
AAAGACUUCUAGG

>EMBL\_CDS:BAF83249 BAF83249.1 Homo sapiens (human) hypothetical  
protein

ACAGGUAAAAGGUAGAAGUGUUGCAUAAAGACGACUGGGUACCUAGAGUUUUAAUUCAGUGUAA  
GAUAUACUUGAUAAAGAGGUACUGCUAUUCAACAACUACACAAACUAAAACCUCAAUACCCG  
UCUCCACCUCUCCUGU

>EMBL\_CDS:BAF82907 BAF82907.1 Homo sapiens (human) hypothetical  
protein

GACGAGGGUCUUCGUGGGGUCUCGAAGACGGGUCAAGAGACCCCGACUACGACCAAGACCCUG  
UC

>EMBL\_CDS:BAF83287 BAF83287.1 Homo sapiens (human) hypothetical  
protein

GUAGGACCCCAAACAGAGUCAAAAAGUCCGACGAAAAGACUAUGACGUCAGUAACUUUUAUGGAG  
UCCAC

>EMBL\_CDS:BAF82366 BAF82366.1 Homo sapiens (human) hypothetical  
protein

AUUCUUUUGGAAAACUAAAAGAAUAGUCUAGGACUUUGGUCACUAAACAUCUCUGACCUUCAU  
CCCAACUAAAU

>EMBL\_CDS:BAF83418 BAF83418.1 Homo sapiens (human) hypothetical  
protein

CACCACCGCCACCGACGACCCCACCACCGACACCACCGCCUCCGACGACACCACCGCCGACAACG  
ACCCUCGCGGCAACAUCGACGGAGACAACAACCUCAACAACAUAAGGGCCAACAACAUAUGGGGU  
CGCCAAGACCGAUUUCGGUGGUG

---

>EMBL\_CDS:BAF83738 BAF83738.1 Homo sapiens (human) hypothetical protein  
UCGUCUCCGUUCCGACCGGUGGAGUAGUAGUACCAGUGAAAACGAGUCGUGACCGUAGGACCGACA  
GUGCAACGACGUCGUCCACUAUACCACCAGCCACCUUCCGGUCCGAGAACACGA

>EMBL\_CDS:BAF83681 BAF83681.1 Homo sapiens (human) hypothetical protein  
CAGACCCCAACAGUCACACGAGACGGAAAAAGAAUCCCGUCUCGUGAAAUGACGGAAACUGUCUG

>EMBL\_CDS:BAF83419 BAF83419.1 Homo sapiens (human) hypothetical protein  
UACGAAAGUCACACAGGCAACGAGGUCGACACCGAUCCUCAGACCCACUGUCAUCACCUCACUAC  
CCGACACCUUCAUA

>EMBL\_CDS:BAG56880 BAG56880.1 Homo sapiens (human) hypothetical protein  
CUAGGUCUACCGACCUGCGAAUGACGGGGGGCACGACUUGAAGUCGUGCAUUUACCCUGCGGGAA  
GUAUCCACAACGGUUAGACCUAG

>EMBL\_CDS:BAG58264 BAG58264.1 Homo sapiens (human) hypothetical protein  
UGACAACCACACCGACUUCGUGAAAUUUCCAAGGACGUCGACGCCGACGUCGACGUCGACGUCGU  
CGACGUCGCACGACGACGUUUUGUCA

>EMBL\_CDS:BAF84207 BAF84207.1 Homo sapiens (human) hypothetical protein  
GGUCCUCACAACCACGUACAACUUAACUACCCCGUGUAAAGUCACGUAAAGUAGUUUAUGAAGUGU  
GCUACGAAACUCUGGGACC

>EMBL\_CDS:BAG58070 BAG58070.1 Homo sapiens (human) hypothetical protein  
UCCUUCGAUUUGGGUAGUAAUCUAUACUCCCUCCUUCUUUAAGAAAAAGGAGAAUAGUACUU  
CGAAGGA

>EMBL\_CDS:BAG58030 BAG58030.1 Homo sapiens (human) hypothetical protein  
CAAGGUCUAGUAGGUGACUCUAUUUGUGUAGCAACGACUACCACCUCAGAGCCACCUACUCCGCG  
ACGUG

>EMBL\_CDS:BAG58082 BAG58082.1 Homo sapiens (human) hypothetical protein  
UUGGAAGGACGGUACUCUAAGAAGACCUUCUCCGAGAAAGAACGAGACGAGAAAGAAAAGGUCU  
UUCAGAGUAGGAACCGACCUACCCAA

>EMBL\_CDS:BAF85421 BAF85421.1 Homo sapiens (human) hypothetical protein  
UACAAGGGGGAGAGAUCGAGACAGACGUCCGUACACAGGACAGGGUCGUUCCCCGGUGGUACAG  
UAACCACUGUCCGUCGAACGACCCGUUCGAUCUCUACGUCACCUCGUA

>EMBL\_CDS:BAF84376 BAF84376.1 Homo sapiens (human) hypothetical protein  
ACCAAGAUGUGUAAUUAAAGAUAAAUGAGAACACUAAAGUGAUCUUAGUCUACUGAACCUUG  
GU

>EMBL\_CDS:BAG57257 BAG57257.1 Homo sapiens (human) hypothetical



protein

CCACCACCCAACAGCACCAGUAUCACCAUGUCCACCAUGAGUUAUGGUGACAUUGAGAACAUCUG  
GAAAGCCGUCCAGAGGUGG

>EMBL\_CDS:BAF84679 BAF84679.1 Homo sapiens (human) hypothetical  
protein

GUAUAAAAGGACAUA AACACACUACUUCUUAACUCCUUUAAGAAGGGUAUGAAUAAUCUUUAUAC

>EMBL\_CDS:BAF85202 BAF85202.1 Homo sapiens (human) hypothetical  
protein

CCGCAAGACAAACGUACUCGGGUCGAACAGGUCCGACCCAAAGAAACAAUUAGCUCUACGA

>EMBL\_CDS:BAG57591 BAG57591.1 Homo sapiens (human) hypothetical  
protein

AGACGAAGAGGGUACAACAUUGGGUACCUCUAGUCCGUCCGCGCCUUUAGUAGGCACAGGUAGUA  
CGGACAGAAGAAGGCCAGUUUCACCAACUCCUCC

>EMBL\_CDS:BAF84216 BAF84216.1 Homo sapiens (human) hypothetical  
protein

GUCUAGGGCGUUUUCCGUGGGUGCAGAUGUCGAGCCGCCGACCUC CAGACGCCUGGUUCGGUC  
CGGAGACGUGACUGACACCGACUUC CACACCGUUUCCAGUCCAACUCCCUAGAC

>EMBL\_CDS:BAG56677 BAG56677.1 Homo sapiens (human) hypothetical  
protein

CCUUGCAAAACAAACCCCCAGAGAGUAAUGGUGUGUUAGACACUCACACGGGGUAAAGAGUUUUA  
CAAGA

>EMBL\_CDS:BAG57781 BAG57781.1 Homo sapiens (human) hypothetical  
protein

ACCGUCCGACUCCGUCCUCUUAACGAACUUCGGUCCUCCGCCUUCAACGUCACUCGUCUCUACG  
UGGUGACAUGAGGUCGGACCCGUUGUCUCGCUCUAAGGUAAAGAAGUCGUCGGU

>EMBL\_CDS:BAF85170 BAF85170.1 Homo sapiens (human) hypothetical  
protein

CUCCUCAGAAACUUCAUCUAGACUUUUAGAAUUUGAUAGAAGUCAUAAAGAACAUCUAAGGAG

>EMBL\_CDS:BAF84864 BAF84864.1 Homo sapiens (human) hypothetical  
protein

ACGAAAGUCCAUACUCAGGUCCAUAGACAGGUUGACCUACGACGGGACCACCGACUCCGU

>EMBL\_CDS:BAF85240 BAF85240.1 Homo sapiens (human) hypothetical  
protein

CCGGAACCUAAGCGACGAGUACGUCAACGACCUCGUCUACCGUCGACACCCAUCGUUGUCCAG

>EMBL\_CDS:BAF84836 BAF84836.1 Homo sapiens (human) hypothetical  
protein

GUUACCAUAGACAUAAGACCGAAAUA AACCGAAAAGGAUCGUCGACGAAGUGAUCGUCAGUAG  
CCAAGUCCUUCGACUUCUUAUCUUCUUAUAAC

>EMBL\_CDS:BAF84347 BAF84347.1 Homo sapiens (human) hypothetical  
protein

GGCCGAGUCCGUCUCGGUCGACGUCGACGUC CAGGAGCAGGGACACCCUCCGACCCCCUGUC  
CGAAGAGACGGAGGAGUGCCGAGUACCGUC CCGGUCGACGUCGACGUCAAGGAGAAGGGGACUG  
CAGACUCCGGCC

>EMBL\_CDS:BAG57215 BAG57215.1 Homo sapiens (human) hypothetical

protein

GGACCAUUUUAUAGGACCCGUCCCGGAGGUCCGGGACCCCCGUGGACCAUGUCCAGACACCCGGCCC  
>EMBL\_CDS: BAG57077 BAG57077.1 Homo sapiens (human) hypothetical  
protein

CCGACGCAUCGGAGGUAUUUAGAGUCGUGGUAUUUUAGGUAGGACUAUGUGCUGGCGAGGCAUUC  
AGCCCUACCCCCACCCCCACCGCGUCGG

>EMBL\_CDS: BAF85419 BAF85419.1 Homo sapiens (human) hypothetical  
protein

AACUAAAACAUUUGGAGGUAACAGAAGUAAGAACUCAUCCACCCUAACCGUCAAAAGGGAAACCC  
CUGACUUCUCUAGUUGACUUGACGUAACGGUUCUACCAACCACUAUUUAACCAGUACCAAAAAAC  
GUUCUAGUU

>EMBL\_CDS: BAG58600 BAG58600.1 Homo sapiens (human) hypothetical  
protein

CAGCGUCUCGGCAGUAUCUGACGACCCCAGUCCACUGACCCGGUACGUCAACAACACGAAAGCCU  
CCAGACCCAUG

>EMBL\_CDS: BAG58480 BAG58480.1 Homo sapiens (human) hypothetical  
protein

GACACCGACCACCCGAGAGGGUAGUCACCGACCUCAUCGCGAGGACAGUCACCCGACCCCACUGU  
GAGGGUAGUCACCGACCUCACUACGAAGGUAGCCACCGACCCCACUGUGACGGUAGUC

>EMBL\_CDS: BAG57966 BAG57966.1 Homo sapiens (human) hypothetical  
protein

CGACGAACUCCCGGUCCUCUGUCCGGUACGUAGCCAUUGCCUUCGUACCAAAGAGUCCGACCUCG  
AGUCGUCG

>EMBL\_CDS: BAG57341 BAG57341.1 Homo sapiens (human) hypothetical  
protein

UGGUAACAGGACGUCGAGACCCGGUCUCGAAGUCGGCCACCGUGCGACGGACGUCCGCUGAGUCAC  
CUGCCUCUACGUCCUGUACCA

>EMBL\_CDS: BAG57707 BAG57707.1 Homo sapiens (human) hypothetical  
protein

UAGGAGGACAUCCUUCGACGACCCGGACAUCUCCGCUAAUGUAUCGACCCGACGACCCGGCCGACA  
CCGUUAUCCCUCCUA

>EMBL\_CDS: BAF85245 BAF85245.1 Homo sapiens (human) hypothetical  
protein

CUCCGAAUUUCAAGUACAGAAACUAAGACUAUUAACCUAAAAGGGGUUAGUAGUCUUAGAGAUCU  
AAACCUUCUCGUAG

>EMBL\_CDS: BAG56840 BAG56840.1 Homo sapiens (human) hypothetical  
protein

CCUCGGGCAGAAAGGGUGGACACCCCCGGGACAGUCGUCCUCGGCAGCCCCACCUUCAAGCCC  
ACGG

>EMBL\_CDS: BAF85698 BAF85698.1 Homo sapiens (human) hypothetical  
protein

CACUUCAAAACAACACUAUAUAAACACAGUGUACUAAAUCCACCCUGAAUGUUUAUAGGUUUUU  
ACUUUUGUCCUGAAAUG

>EMBL\_CDS: BAF85766 BAF85766.1 Homo sapiens (human) hypothetical

protein

AGAAGUCUCACCGUAGGCGAAGUACGUCAGAGAGGACUUCUCAGACGUCUCGAACUAAGACGUCC  
GACAAUGGAAGUGAAACUAGGACGUAAUAAGCACUAAAAAGUGAGACAUUCC

>EMBL\_CDS:BAF85338 BAF85338.1 Homo sapiens (human) hypothetical  
protein

UGAUAUGUCCCGGACGACUCCAACACUUAUAACGACAACAUAUACGUCGACGACGUCGACGCCGAA  
CAACGACGUUACGUCGUCAAACACAAUUGACUAUCAAAACGACCUCAAACACACCA

>EMBL\_CDS:BAG58200 BAG58200.1 Homo sapiens (human) hypothetical  
protein

GUGGGAGGACGGACCGUCCUCGAGUGACCCGGGUGUCCCAAGAGGCACCGUAACUCCGGUC  
CAUCCACCGAC

>EMBL\_CDS:BAF84446 BAF84446.1 Homo sapiens (human) hypothetical  
protein

CCGGAGGGUAAACUCAUCCUAGUCGGUAAGGUUCAAUUCGACUCCGUAAAGAAGUCAGAAACGA  
AAGAACCCCGAACCGUUCAGAGAACUUCUCAGUCUACCCUCCGG

>EMBL\_CDS:BAG57305 BAG57305.1 Homo sapiens (human) hypothetical  
protein

AAGACGUCGAAUUCUACCAUCAAACAUCUAUAUAGUAGAUCAGGUAGAUUCGUAAGGUGUCUU

>EMBL\_CDS:BAG57209 BAG57209.1 Homo sapiens (human) hypothetical  
protein

CCUCGGCAGGUCAAGGGGUCCCUJACCCCCACCAUACCUCGGGCGUCCCGUCUGGCGAGGGUUA  
GGAACCUCCCGAGG

>EMBL\_CDS:BAF84645 BAF84645.1 Homo sapiens (human) hypothetical  
protein

AAGGACACCUCGACUCUGACAAAAGUGGAAAUCAGGGGACCUCCAAACCAAAGGUCUAUAUUC  
ACUAGUCCUGGAAAUUCUGUCCGCUUAUACAGAUGAAGGUAUCCCU

>EMBL\_CDS:BAF85023 BAF85023.1 Homo sapiens (human) hypothetical  
protein

AGACAAGGGACCGUUAUGGAGGGCUUCACCGACCAUCCCGACCGGUGACCUCAAACGAUACCGAC  
GUCC

>EMBL\_CDS:BAF84376 BAF84376.1 Homo sapiens (human) hypothetical  
protein

CAAAGAAGACUUCUAUCCGUAAAUUGAUCAAGACGUAAAAUCAUCCACUAAAUCAUCCUCUUCU  
GUUCUAAUAUCAACCGUCCAAAAGAGGUAAUUAUGAUCUUUGUCGUGACCAUUCAAGUCAUAGAC  
UCCUUUG

>EMBL\_CDS:BAF84474 BAF84474.1 Homo sapiens (human) hypothetical  
protein

CGUCUCUCAACCGUCCACGGAGACGGGGUGACCUCGUCUACUAUCCGAGCCGGACCAGUGAGAGA  
CG

>EMBL\_CDS:BAG56859 BAG56859.1 Homo sapiens (human) hypothetical  
protein

UCGACGAUCUCGACCUCGACGCCUCCACGACCUCGAAGGACUCGCCGACCUACGACUCCUUCUC  
GACCUCGGUGACGAACUCGGUCACGACCACGA

>EMBL\_CDS:BAG58495 BAG58495.1 Homo sapiens (human) hypothetical

protein

GAGUCCCACCAGGAGAGUGUGGUCAAGUGAGGAGAACCGACCCACUCCAACACCUUCUCCUGGUA  
UAGGAGACCC

>EMBL\_CDS: BAG58417 BAG58417.1 Homo sapiens (human) hypothetical  
protein

GGACCGGACGGGAGGAGAGUUACAGGUCGACGAGACCGAACUCCGACAGUCUUCGGCUUCAGCA  
CCGGUUCUUUCGUCGGGACCUCACCCUCCAUGACCGUCCGGUACC

>EMBL\_CDS: BAF83866 BAF83866.1 Homo sapiens (human) hypothetical  
protein

ACCGUCCUUCUACCGUGACCGGUCCAACGGCCACUGUGGUGAGUCGUCCAUCUACUACCGAUACG  
CCACGGUCGGACGGU

>EMBL\_CDS: BAG57315 BAG57315.1 Homo sapiens (human) hypothetical  
protein

CAGAGCUGUACCGAUAAAAGUUCUUUCGGACUAAAUAUUUCAUAUCCACCACAACUUGGUACA  
CUCCG

>EMBL\_CDS: BAF84089 BAF84089.1 Homo sapiens (human) hypothetical  
protein

CCAUCACGAAAAGGCACACCUACUUGACCAUCGGGCAGUGUAUCCGACGGUCCUACGGUGGGUCG  
UGACGG

>EMBL\_CDS: BAG56931 BAG56931.1 Homo sapiens (human) hypothetical  
protein

CGAACAACCUCACUCAGGAACGGGUCGAACACGAGUCUCCACCUCGUCCUCAGGUACUCCAG  
ACCCGGUGGUGGCUGUUCG

>EMBL\_CDS: BAF84102 BAF84102.1 Homo sapiens (human) hypothetical  
protein

CUUAAGAGACUACAACUUAUAUCGAACCGAAAAACGAUUCCAUAAGGACACAAAGAAUUGAAGU  
CUCGUAAA

>EMBL\_CDS: BAG58077 BAG58077.1 Homo sapiens (human) hypothetical  
protein

GGUACACUUCUGUCUAUCUCGUCAGGUCCAGGUAUGACAGACGAAACAUGAAAAACAUACC

>EMBL\_CDS: BAF84735 BAF84735.1 Homo sapiens (human) hypothetical  
protein

CCUCCCGUCCACCCCUACACUCCGACUCGAAAGUAUAGAGGCGUAGUACAUUAUAACGAGAAG

>EMBL\_CDS: BAG56779 BAG56779.1 Homo sapiens (human) hypothetical  
protein

CUGUCGUCGAGCGACCACCACGACUCCGACAGAAGUAACUCCGACCUCCACUCCUGCCGUCUGA  
GUCGACUCGGUCGUCGUCGUACAG

>EMBL\_CDS: BAF85554 BAF85554.1 Homo sapiens (human) hypothetical  
protein

CAGGGGAUGUCUACCCACAAAUCUAUCACGGAAGUUUAUAGGACACAUCGACCGUCAUAGACUC  
CUACACAGUACUCCCUUG

>EMBL\_CDS: BAF83895 BAF83895.1 Homo sapiens (human) hypothetical  
protein

GACCCGACUUUAGGUCAGGGGAUGAAACCGACCCCGCACUCGGAGGUCCUAAGUCCCAAGAC

CCCUCUGUCUAAACGAGCC  
>EMBL\_CDS: BAG57690 BAG57690.1 Homo sapiens (human) hypothetical protein  
CGACCCGGGGGUGGUUCGGAGACGAACCCCAGGAAGAAUUCGUCGGGUCGUUCGUCCUGAACC  
GGAGCCCCGACUCG  
>EMBL\_CDS: BAF85101 BAF85101.1 Homo sapiens (human) hypothetical protein  
CCCUGAACACACAGAGGACGACACGUAGGUAUGACCCACGAAAUCUUUGCCGUCGUCGGUCUU  
CGGG  
>EMBL\_CDS: BAF84857 BAF84857.1 Homo sapiens (human) hypothetical protein  
CCCCUCAAAAAGAGUCUCCCUAAUCGACCAAGUGUCAACAUAUACAUAUAUACCACACACUCG  
AGAUUAUUUAAGUCUGAGAGG  
>EMBL\_CDS: BAF84433 BAF84433.1 Homo sapiens (human) hypothetical protein  
CGAAAUCGGACGACACCGACGCAGUCCUCGAAGGAGUCCUGCAAGGACACCGGCACCCGUCGACU  
CACCGACUUCG  
>EMBL\_CDS: BAF85661 BAF85661.1 Homo sapiens (human) hypothetical protein  
UCGGUGUGGUUGUCUCUACCCGACUACGGACGGGACCUAUGGUGUCCACAAACGGGUAAGAUUCC  
UCCACCGA  
>EMBL\_CDS: BAF85008 BAF85008.1 Homo sapiens (human) hypothetical protein  
CCGUCUUUUAGCUAAGUCUACCUCGUGCUCUCCUAAAGCUCCUJAGAAACAUGACAGUUGAAAAACC  
AUGAAGCUCAAAGACGG  
>EMBL\_CDS: BAG58141 BAG58141.1 Homo sapiens (human) hypothetical protein  
CCUCCUGGAUUUUGUCUUCUAAAAGGGUGUAAGCGACGUAAGUAUCCCGAAGAGUGGACACACUC  
AAGAGACCACGACCUAGUCACCCCGUUAACCAACUCCAGGAGG  
>EMBL\_CDS: BAG58003 BAG58003.1 Homo sapiens (human) hypothetical protein  
CCCCGACAUCGUGCUCGCGACAUCGUGCUCGACGACAUCGUCCUGCACGACAUCGUGCUCUCCUG  
ACAUCGUGCUCUCCCGACGUCGUCUCCUGCGCAGUGUCGGGAGCGUUGACACCAGGG  
>EMBL\_CDS: BAG57805 BAG57805.1 Homo sapiens (human) hypothetical protein  
AGCAAUCACACCCAAAGGAGGUGUUCGCAGGUGUCGAACGACUCCUUUCGGCCGUGCAAGCU  
>EMBL\_CDS: BAG57303 BAG57303.1 Homo sapiens (human) hypothetical protein  
CUCCUUCGGUACGGACCGUACCAGGUACCAUGAACGACACCGGUCCAUGAACCUAGGCACGGAGA  
CCCUCCCAGAGAAG  
>EMBL\_CDS: BAF85323 BAF85323.1 Homo sapiens (human) hypothetical protein  
CGCGUGGCGACGGAAGACCCCUCCGAGACCUACAGAGAUUUCUCCAGGACCCGGAGUCGGAGCU  
UCUCGGCCGCCAACAGGCACA

---

>EMBL\_CDS:BAG57928 BAG57928.1 Homo sapiens (human) hypothetical protein  
GUACUCGCAGGAGGUCUCGACCUACCGUAGGAACACCCGUUCCUACAUCGAGCCUAACCGGGCG  
AAGUAC

>EMBL\_CDS:BAG57970 BAG57970.1 Homo sapiens (human) hypothetical protein  
UCUCAACCGUCAAGAAACCGGAAAAGAAACAGUGAUCGAAGAGAUCGGUGACAUCUCGGUCAACC  
GAACCCUUUUUACUUUCACCGAAAAUCAACCGGUAGAAA

>EMBL\_CDS:BAF85130 BAF85130.1 Homo sapiens (human) hypothetical protein  
ACCGUACAAAGUCUUCUACCAAAAACAUGACGAUAAAGAACCAUGAGUCUUUUUAAGAGGACUAU  
AUACAAU

>EMBL\_CDS:BAF84054 BAF84054.1 Homo sapiens (human) hypothetical protein  
AACCACUGGACGUGCAAGUCCAUAUAUAACAGCUACUCGCCGGUCCGCGGGACGUGGAACGUCCA  
GACCUUCGCCAGCCACUUUCAGGACUCCACACCCAGGGGCU

>EMBL\_CDS:BAG57942 BAG57942.1 Homo sapiens (human) hypothetical protein  
CCUUCUCGUGGCCUACCCCCGACCGACAUGGGACUACCGCGGAUCCUCCUGGGAGUACAUCUC  
CCUCGCCCCCAUGCGGUCAGGAGGUUAUGACUAGACGAGAGA

>EMBL\_CDS:BAG57811 BAG57811.1 Homo sapiens (human) hypothetical protein  
UCUUCUGCUGACACUCCGGUGUGAUGAAACACCGUCCUUCAGUCGAGACGAUCGACUCGUAGAAC  
GACGUCCUGACCCAGAUUGUCGAAUAGUAGA

>EMBL\_CDS:BAG58536 BAG58536.1 Homo sapiens (human) hypothetical protein  
UCGAGGAAUACAAAUCACUCCUGACACGAUACUUAUUUCCUGAAUGGUGUUAGGAACGUAAGUAU  
CUUACCAUAUCGAGGAAACUCCCCGA

>EMBL\_CDS:BAG57899 BAG57899.1 Homo sapiens (human) hypothetical protein  
ACCAGACCAUCAACAUCACGACGAAGACGACUGAGUCCUAGACGUCAACGUCCUUGUCGACGACG  
ACGACCUCGU

>EMBL\_CDS:BAG57602 BAG57602.1 Homo sapiens (human) hypothetical protein  
CGACUCCAUUUCGUCAGGCCCUAGAGUAAUAACUACUCCGAGACCUCCAAUUACCAGAAGUCG

>EMBL\_CDS:BAF85257 BAF85257.1 Homo sapiens (human) hypothetical protein  
AUAUUCGAGAAGACCCAAAAACGGAAAGUCGACGAAAAAUCGGUCCCGUCGGGUAAGACCCACUU  
CCCCGACAACGACCACAUCUUCAGCAACGACAUACUCGGACCUCGGACUAC

>EMBL\_CDS:BAG58444 BAG58444.1 Homo sapiens (human) hypothetical protein  
AGGACCAUGACGACCAAUAAGAGUCUCUCGUUUCGGACGACUCCACCUCACCGACUGUCACGG  
UCCU

>EMBL\_CDS:BAG58021 BAG58021.1 Homo sapiens (human) hypothetical

protein

GGACCCUCCGUUCUCGUCCGGGACGUCUCCGACAAGAGUUCAGUUUCGACCCGGACAAGUACGGU  
GGCCC

>EMBL\_CDS:BAF85237 BAF85237.1 Homo sapiens (human) hypothetical  
protein

CUCGAUCCCUACGGUGAACGCAUUCGCGGACAGUUCUCCGAGUACCUUCUCGAAGCCCUAGAGAA  
UAAGUUCACCAGUAGACUCGAG

>EMBL\_CDS:BAF84119 BAF84119.1 Homo sapiens (human) hypothetical  
protein

AAGACCAAAAACUUUCUCAAUUGUCUCACCAGAAAAAAGUGAUGAGAGAAAAAGAGAACAUGGUU  
UCCGACCCU

>EMBL\_CDS:BAG58492 BAG58492.1 Homo sapiens (human) hypothetical  
protein

GUUUACGGACAACUACUCCCCAACAAACAUACUGAGGUCCUGAUCUGGGGUCGAGUCGGCCGUAA  
AC

>EMBL\_CDS:BAF85447 BAF85447.1 Homo sapiens (human) hypothetical  
protein

GUCGGUCAGGAGUAAUAGAACCCGAACCCAGUGACAUCACGUAGCUGUGGAAGACCGGGUCCU  
ACAACUCCCUACGAC

>EMBL\_CDS:BAF85025 BAF85025.1 Homo sapiens (human) hypothetical  
protein

UCCUUUGUCGUUUCCUGAAAGAAAUCCACCGACGAUAAAACUUCUUUCAGUAUGGUGACCAAAG  
GA

>EMBL\_CDS:BAG57874 BAG57874.1 Homo sapiens (human) hypothetical  
protein

GUCAAGAAAUACAGAUGUAGUCGUCUCUCAUUGACUACGGGAGAGUAAGAACGACACACCUACA  
CUUCUAGAC

>EMBL\_CDS:BAG58442 BAG58442.1 Homo sapiens (human) hypothetical  
protein

AGGAUCGUGUGGCAACCCCAUCACGAGACGGAGGUAGAGGUAGAGUGACAGCGACACCCCUCCCC  
AACUCCACCCUCAACCGGGUCCCCACACCAACCU

>EMBL\_CDS:BAF85424 BAF85424.1 Homo sapiens (human) hypothetical  
protein

CUUCUUGUCUUUUUCCUCUGUUUCUCCCGCAACACUAUAAAACGAGAAGCUUUACAGAGUCGUC  
UACGAGAACGAAAAGAACGAAACUCGAUAAGAAA

>EMBL\_CDS:BAF84536 BAF84536.1 Homo sapiens (human) hypothetical  
protein

GUUUUCUGUACCGUUAAAUAACUUAAGAACGACAUAACAGAACCAUCUCAUUCAAAAUGUAAAAA  
CACGGUUUUAAAGAAAAC

>EMBL\_CDS:BAG57445 BAG57445.1 Homo sapiens (human) hypothetical  
protein

CAUAUAAUGAGGUCACAGGAGUGGUCGUCAAGACAUUAACGUCCCCACGUACCCUCUCCUCGACC  
CUAUCCUCG

>EMBL\_CDS:BAG57264 BAG57264.1 Homo sapiens (human) hypothetical

protein

CACCCGGGCCAGUCACGCGUCAUGUAGGAACUCCUGGCACGACGCCUACUUAAGGUCCAGGAGUC  
CCAAGCGAGCGACCCGGGUG

>EMBL\_CDS:BAF85124 BAF85124.1 Homo sapiens (human) hypothetical  
protein

CCGAAGCCCUAUCCCCACCCUCCCCUCGACGCAUCGGUUGAAGAACUUUCACGAGACCGGAG  
UCGACGGAGACAGGACAUCGG

>EMBL\_CDS:BAF83938 BAF83938.1 Homo sapiens (human) hypothetical  
protein

CCGACCUGUUGCUACAGUCCUCCAAAAACUGUAGUGUCUAUAUCCACGGUAACACAUAUUUGAC  
GUAAAAAGAUACAACUAACUACGUAGAAAGAACAGUUCAGAGGUCGG

>EMBL\_CDS:BAF83918 BAF83918.1 Homo sapiens (human) hypothetical  
protein

GCGGACGCCUCCAUCGUCGCAACCGCCAGGGAGUCCGAGAUCGAACUGGCGGUGGAGGCAGACAA  
GGAGGCGGUCGC

>EMBL\_CDS:BAF85253 BAF85253.1 Homo sapiens (human) hypothetical  
protein

AGGUCCCAAAUCCACUCGUCACACCCGAACUUGACUUCUACAGUUAGAGUCACGGGACCU

>EMBL\_CDS:BAF84759 BAF84759.1 Homo sapiens (human) hypothetical  
protein

ACGGUUUUCACAGUUGGAAAAGACCAAUCCUUGGUGUUUUGACUAGUGUAUCCUGACUAGUGAAA  
ACCGU

>EMBL\_CDS:BAG57486 BAG57486.1 Homo sapiens (human) hypothetical  
protein

UCGACACCAAUCUCGGUCCGCUCCUCACUAUUAAGCGAGUUACCAACCCAGUAAUCGGUUCAA

>EMBL\_CDS:BAF85387 BAF85387.1 Homo sapiens (human) hypothetical  
protein

GUUUCUCCCGUUCUUGAGCCGGUGAAAAGACCCCGAACUAAAAGGACUUCGUUACGAGGUCCCU  
CCAUGUCGAACUCAAGACCUAGAAGGUAAC

>EMBL\_CDS:BAF83900 BAF83900.1 Homo sapiens (human) hypothetical  
protein

ACCGUGACCCUGAAGACCAGGACGUCGUGCCACCACUACACCCUGGUCAACACGACCCGGU

>EMBL\_CDS:BAF84318 BAF84318.1 Homo sapiens (human) hypothetical  
protein

CACCCGGGUCGAGUACACGGUCCAGUGCCGACGUGGUUCCCCUAACAGACUUACCAGGUACUGUU  
AAGGGGUCUGACCAGACGGCACGUGUACGAGUACUAACCCCGGUA

>EMBL\_CDS:BAG58534 BAG58534.1 Homo sapiens (human) hypothetical  
protein

CGGGGGAGGAGUAGGUUCCCGGUCUCGACCCCCAGAGUCCGGACGCCUCCGUUGAACCUACCC  
UUCCTCG

>EMBL\_CDS:BAG57202 BAG57202.1 Homo sapiens (human) hypothetical  
protein

UUCAGGAAAACGUCACACUAGAGCGACUACUAAUGACUUCGACUGUAUAGACGAUUUCCUAAAA

>EMBL\_CDS:BAG60413 BAG60413.1 Homo sapiens (human) hypothetical



protein

CGAGAAUGUAGAUAGUCGGUCAUCAGGACGACGACAGACGGUAGAGACUACCUACACUACCCG  
>EMBL\_CDS: BAG61320 BAG61320.1 Homo sapiens (human) hypothetical  
protein

ACUAUGUCAAUAAACACGACAACCGACUCCUCAUCUGUCCGAUUCGAAACAUCCGUCACGUUGUC  
GACCGACACAAU

>EMBL\_CDS: BAG61920 BAG61920.1 Homo sapiens (human) hypothetical  
protein

GGCUCUCCUAGGUCCGUGUACCAUAGGUCCGAACGUAAACAUAACGUCUUCCUCGGGUGGAACA  
CGAAUAAGAGAGCC

>EMBL\_CDS: BAG61669 BAG61669.1 Homo sapiens (human) hypothetical  
protein

AACGGGUGGUAGUGACAAGGGAAUCCUAGACUUAUCACUAAAACCCUUAACCCACCACACCGUU

>EMBL\_CDS: BAG59189 BAG59189.1 Homo sapiens (human) hypothetical  
protein

GAGGGUGUCGGGAGGAGUGUCUGACUUCUCACCUCCAAGGGAGAAACCCAGAAGGUUUUAGUGUC  
GUAUUACCACUCCUCUCCCCACCCUC

>EMBL\_CDS: BAG59510 BAG59510.1 Homo sapiens (human) hypothetical  
protein

UAACUUUUGCAAACGGGACAAGUUGAAGAUCUUUCCAAUUAAGACUGUUUUUAUCCGAAAAGACCU  
UGUACCCAUUAAGUUA

>EMBL\_CDS: BAG63066 BAG63066.1 Homo sapiens (human) hypothetical  
protein

CGGCGACGACGACGACAACAACCACCACUACCACUACUACCACGACUCCGUUGUCUCCGUCGUCG  
ACCUUAGACUGGGCGUCGUCGACCUCUUUGUCGUCGUCGUCGUCGUCGUCGUCGUCGUCGUCG

>EMBL\_CDS: BAG62663 BAG62663.1 Homo sapiens (human) hypothetical  
protein

CAAAGAGUCGGUAAUAGUAAUCGAGUCCUCCUUUAUAGUCAAGGACCCAACCUAGGUUACCGUCU  
UUG

>EMBL\_CDS: BAG60917 BAG60917.1 Homo sapiens (human) hypothetical  
protein

UCGGUGUGUCUUGACCCCCAGGUCCUUGGUACUUCGAACCGACACCAGAUCCCUCGGUCCUAG  
ACCUGUCACAAGACCCAGUAUCGGUCCUAAGACCUAACAUCAUAGACACGUAACGA

>EMBL\_CDS: BAG61437 BAG61437.1 Homo sapiens (human) hypothetical  
protein

CACACCGACCACUCCUCGGACCAGUGGAGGCCUUGUGGACCAAGGGGUAGUGAGACACGUCGUC  
UCCCACCGCCUGUACAACGAGUCCUCCUCCGAGGCCUGGCGUGGUGUA

>EMBL\_CDS: BAG61141 BAG61141.1 Homo sapiens (human) hypothetical  
protein

ACUUUAAAUCGAAGGUAGUAAAAACAAAAGUACAGGUCGAGAAAGAGUGCAUAAGCUCUCUCUUU  
UACUAGUAGUACCUUUGACGACC UAAAAGAGUCCGACUUAAGC

>EMBL\_CDS: BAG61361 BAG61361.1 Homo sapiens (human) hypothetical  
protein

GGACACGACCCGUCCGGACGUGGCCUUCAGGACGUGACCCGUCAGGGUGUGGCCCGUCAGGGCG

UAACCCGUAAGGACCUUGACGUCCUAAUGGACCGUGUCC  
>EMBL\_CDS:BAG62184 BAG62184.1 Homo sapiens (human) hypothetical protein  
ACUCCACUCAAAAAGACCCACCCACAUAACGGGAAUCUUCAGGACUGGACAUAUCUAUGUGAGACG  
AGUCUUCGAUAGCGGAGU  
>EMBL\_CDS:BAG62251 BAG62251.1 Homo sapiens (human) hypothetical protein  
GAUAAAAGAAAAAGAAGAAGAAACCACCAAGUAGCAGUCUCGACGAUAGACACGACCACGAUGACG  
AUGACCUUCUCGACCUUAGACUCAGACUAGUCUCCUCCUUCUCCAACACC  
>EMBL\_CDS:BAG61188 BAG61188.1 Homo sapiens (human) hypothetical protein  
AGGAGAAAUGACAGUGGUUCUCGACGAAAAGGUCUACGACCGAGGAGGAACGAAAAGAGAAACGA  
GAGCAUGUAGAAUGCUUAGUGACUCCAUCCCCAUUUCUUCUUCUUCGUACGAACACUACCUC  
GUCGUCCCCGUCCCCUUCUCCU  
>EMBL\_CDS:BAG62653 BAG62653.1 Homo sapiens (human) hypothetical protein  
ACCCCGGACUAGGAACGGGCUUCCGUCGAGACGGGUCUCGGACCCACCGCAAGAGCUUCGGGUCC  
CGGGCCGUCUGCUGCGACCGUAGUCAGUCCAGGGU  
>EMBL\_CDS:BAG58852 BAG58852.1 Homo sapiens (human) hypothetical protein  
GACGAGAGUACGUUUCUUAAGGAGGACGACCAGAACCUGGAGAGUCUACCCGUCACCUCCCC  
CAAGAAGCUGCCCCGUACCCCCGCC  
>EMBL\_CDS:BAG62270 BAG62270.1 Homo sapiens (human) hypothetical protein  
CCCCGUCACUAUAUCCACGCAACAGUAAGAGCAGGUCGUGUAACUACCACUGUGGUUGCAUUCG  
ACUCGCUCCACCCUGCGGUGGUAGGUGACGGAA  
>EMBL\_CDS:BAG60629 BAG60629.1 Homo sapiens (human) hypothetical protein  
CCCCAGACCGAGUCACAACGAACCCUGGAGACAGAGGUCACCGUCGUAGAUCAGGGGACGUCC  
CGAAGGAAGGGG  
>EMBL\_CDS:BAG59726 BAG59726.1 Homo sapiens (human) hypothetical protein  
CCUUUCGAUCGAAGGAGGCCUUGACGGACCCCGGAGACCGAGGGAAGGUCCUCCUGAACUCCAC  
GACGUCGAGAACCCAGACGUCCUCCAACCAUAAGG  
>EMBL\_CDS:BAG62080 BAG62080.1 Homo sapiens (human) hypothetical protein  
CGAGACCCAGGAACCUCCACGCCUCCAUUUGGAGUGUCUACCAAACUGGAGUCAGACACAUCGA  
AACCCAAACACCUCCG  
>EMBL\_CDS:BAG58688 BAG58688.1 Homo sapiens (human) hypothetical protein  
CCCCGUGCCUCCGAAACCCUUCACCCCCGUCGGUUAUCGACCCGGGGUAGGCGAGGGAGUCC  
GGGGCAAGGAG  
>EMBL\_CDS:BAG60605 BAG60605.1 Homo sapiens (human) hypothetical protein

---

GAGGCUCCGAUAUCCUUGGUUCCGGUCCAGUAACCUCGGUCCCGAAGGUCUUACAUCGACCGCA  
CCGGGACCCCGUACCCGAAGACCUC

>EMBL\_CDS: BAG60014 BAG60014.1 Homo sapiens (human) hypothetical  
protein  
AGUAGAGGUGAGAAGACGUCUCCGGAACAAAAGCUCCAUCGCGACCUCACGGCUCUACU

>EMBL\_CDS: BAG62491 BAG62491.1 Homo sapiens (human) hypothetical  
protein  
CCCUAAAAGUCAAGGUCUCUCACUCAGAUAGGGCAGAUCCGGCCCUAGAAAUGAGAGUUAGAAAUC  
CGUGACUUUAGGG

>EMBL\_CDS: BAG62745 BAG62745.1 Homo sapiens (human) hypothetical  
protein  
GACGACCUAGUCGUAGGCGGUGGCACGUCCCAGGUCUCCAGGAACAUGCCCCUCUACACGCACA  
GCCCGCC

>EMBL\_CDS: BAG58970 BAG58970.1 Homo sapiens (human) hypothetical  
protein  
UCCACCUCCCCUCCACUCCACCUCCCCCGACCUCGCCGACCUCUCCGACCACAGUGACCCCCCG  
UCCCACGUCGAUGACGACACCCGGACUCGGUUGACGUAGUCCAGAAAAGAAAGAAUUAAAAGUCC  
AGAGAGAAGUCGAGAAGGACGUGAA

>EMBL\_CDS: BAG62696 BAG62696.1 Homo sapiens (human) hypothetical  
protein  
AAAGAUGUCCGAAGGUCUCUAAGGUACAUGUAAGAGAAUCACUACUACCUCAACAGAUCCUCCGG  
AAGUUUCUUC

>EMBL\_CDS: BAG59694 BAG59694.1 Homo sapiens (human) hypothetical  
protein  
CCCACCCCAGAGGAACCCCGGGGAUCGAAGGGGAACCAAUAGAACUCACCCAGACCGAAACCCC  
CAAACCCCAAAGUAGG

>EMBL\_CDS: BAG60617 BAG60617.1 Homo sapiens (human) hypothetical  
protein  
CCACCCUACUCCACAAAAACGCGUUGUGUCA AUGGUUGUCCUACCCUGACACUACGAACAUC  
CGUCGGAAGGAGAGACGG

>EMBL\_CDS: BAG60390 BAG60390.1 Homo sapiens (human) hypothetical  
protein  
UAGGACCCUGAAAUACACCAGUCGUCUUA AUGUAAGAAAUACAGUCUCAGUAGCAAACCUCAGG  
GUCCUA

>EMBL\_CDS: BAG62105 BAG62105.1 Homo sapiens (human) hypothetical  
protein  
GGAGGAGCGGGAACGAGACAUGGUCCAGGUCUAAAACGCCUGGAACAGUCCGACCCACCCCGUC  
C

>EMBL\_CDS: BAG59014 BAG59014.1 Homo sapiens (human) hypothetical  
protein  
UCGGACCGGUGUCGGACGUAGUAGAGUAGGGUCUCCGCCUCGUGUCCGAGCCCCAGGAAGUCCCG  
GACUCCAAACACCAACCGUGACAGUCCUACUACAACAGGCACCGGUCGA

>EMBL\_CDS: BAG62713 BAG62713.1 Homo sapiens (human) hypothetical  
protein

UCCCCAAAGAACUCUUCGUCACUGAAGAAGACCUGAAACCAAGAGAAGAAACAGUCGGGAAAAAG  
GAACCUCGGUCACAGGUGCUUCUUCUCAAAAAGUAAACCCCGGAGA

>EMBL\_CDS:BAG59538 BAG59538.1 Homo sapiens (human) hypothetical  
protein

AGGGACGACGACCUCGUGUCCGACCGACUGUCCUACUGGUCUCCGUCCUAUAGGUCGUCAUCCCU

>EMBL\_CDS:BAG62640 BAG62640.1 Homo sapiens (human) hypothetical  
protein

GAGCGACCAUCAGAACUGCUGCCCUCAACCAUCGUGUGUCCACUCGACGGUCGGUAUCCGGCGGU  
CGCUC

>EMBL\_CDS:BAG59148 BAG59148.1 Homo sapiens (human) hypothetical  
protein

UCGUUAUCCGAGGACUAAACAAUUGAUAAACUACAGACAGGUUAUCAUACUUUUUUCUUCAGUC  
CUUGAGAACGA

>EMBL\_CDS:BAG59956 BAG59956.1 Homo sapiens (human) hypothetical  
protein

CCAGUGACCCCGAGAAAGUCACGACCGACGUCACUUCUGUGACUACGGCGAUGACUUCGACCUCA  
GUGUCCUUGG

>EMBL\_CDS:BAG61877 BAG61877.1 Homo sapiens (human) hypothetical  
protein

CACCUCUCCCACGGACGACCCCCUGACCCCGGAAGCCGUGUCCGGGGAACAAUAGGGUCCACGGU  
UACAGGUA

>EMBL\_CDS:BAG60351 BAG60351.1 Homo sapiens (human) hypothetical  
protein

UACCGAGGUCACACCCACGACCGGUCCGGUCAAGCACCCUUGCAUGUACCCGACCCACCUCCG  
GGGUCGGAGAUGGGGACCCCUACCUUCUGUGACCUUCAAAACCGUGACCUCGGCA

>EMBL\_CDS:BAG61210 BAG61210.1 Homo sapiens (human) hypothetical  
protein

CCCCACCCCUACCACCUCUGUGACUCCGGACGUCACGGGAGACGUCUACUCGGGCGAGGGAGAC  
GAGGACCCCGAGCCCGACUAACGCGUGACGACUCCACCGGGUCGAGGAGGUGAAAGGGGAAGA  
CGGA

>EMBL\_CDS:BAG60577 BAG60577.1 Homo sapiens (human) hypothetical  
protein

CCUCUGGGGCACUCCGCGUCCCAAGGACCCCGACCUAGUACAGAGACUCGUCGGAGACCGAGAC  
AAAGAACUCCCAGACG

>EMBL\_CDS:BAG58638 BAG58638.1 Homo sapiens (human) hypothetical  
protein

GUCUCGAGGGGGUCAACCCGGGCACCUCACUCCCGAGGUCCGGACGACGUGCCCCUACAAGAC

>EMBL\_CDS:BAG60983 BAG60983.1 Homo sapiens (human) hypothetical  
protein

CCACAGAGCUCUAUGAACAGUUGCCGUAGUCCCAUGACCGACGACAACAUCUUGAGCUUGGUG  
G

>EMBL\_CDS:BAG62808 BAG62808.1 Homo sapiens (human) hypothetical  
protein

CGACACGUAGACCCGGCCCUACUUCGCCCCGGCGGGCAAGUAGAACCGGUCCCGCAUGUCG

>EMBL\_CDS:BAG59077 BAG59077.1 Homo sapiens (human) hypothetical protein

AGAAGGAACGGAGGAUUUUGUGGUGACGAAGGGACGAGGUAACCGACUCCGACUAGGUCCGACAG  
UCCACCACCACCACCACCGUUUCUUCU

>EMBL\_CDS:BAG61752 BAG61752.1 Homo sapiens (human) hypothetical protein

CCGAGACCCGAGCCGACUCCUUCAUCGACCGGUCCUUCGGGUCGAACGGAGGUGUGGCCAGAAC  
UCGG

>EMBL\_CDS:BAG59247 BAG59247.1 Homo sapiens (human) hypothetical protein

CGACACCGGCGGUGAAGCCGGUUUAGGACCCCGGGAGUGCCGUUCGUGUCCAGGGUCCACGUCGA  
CACCGCCGUCGUCG

>EMBL\_CDS:BAG59760 BAG59760.1 Homo sapiens (human) hypothetical protein

UAAGUACUGAAAGUACAUCUUUAUUCUUUGUCGGUUUAUUGGAUGAGAAAAAGAUUCUCCAAA  
GGAACAACCCGAUUGAACUAACGUACUUA

>EMBL\_CDS:BAG62203 BAG62203.1 Homo sapiens (human) hypothetical protein

GGCAUCAACAAGACCCGCCCUUCGUAAGUGACCCUCUGAGGUACCUUCGGUAGGAGUCGAAA  
CAGAGGGAACCCUUGAAAGGGACGGUGUCCAACCACGCC

>EMBL\_CDS:BAG59795 BAG59795.1 Homo sapiens (human) hypothetical protein

AGAGGUCAGAUCCCAGACUACGAGGAACGACGUCAUUAUACGAAACACCGUAGACCUCGUGCAAA  
ACCCCGGAUUUGUCGGUGUUUGGACGUCUCUACUCGUGGUCUGAAUUCGACCUCU

>EMBL\_CDS:BAG60566 BAG60566.1 Homo sapiens (human) hypothetical protein

ACAAUUCUGUUACGUGACCCCGACUUCAAAAAUGCACCAGAAGGUGACACCAAUUAAGGUCUC  
GUAACAGAUUUCGU

>EMBL\_CDS:BAG59668 BAG59668.1 Homo sapiens (human) hypothetical protein

AAAAACCCCUAUGCACGAAGACCCCGAGUGAUUAAAUACUGAUGUGGGGCCUUUCACAACCA  
CAGGAGUUCUU

>EMBL\_CDS:BAG59450 BAG59450.1 Homo sapiens (human) hypothetical protein

AGACGUCGGAACCUCCCCGAACCCCGGAUCCGUUCCGGACCGGAUGACCGGGAAAGUAGACACCU

>EMBL\_CDS:BAG61934 BAG61934.1 Homo sapiens (human) hypothetical protein

CGGUCCACAAAAGUCAGAAGGGUCUACGAGAAAGGUACUAAUUGGGUAUAGAAGGAGUCCUUUA  
UACCUUUUAGGAAACCUUGCAUAAACCGUCAAAACCUCCGAAUAUCGGACCG

>EMBL\_CDS:BAG59929 BAG59929.1 Homo sapiens (human) hypothetical protein

CCGGUCCGACCCCGACCCCGGCCACCCUCCUGACUUCUUUCUUCGACCUCCGACACCCCGG  
GUCUCCGAAACCCGUCGACGAGACAGGUACGGGCGUCCGGAAGCAUUCAGACCGA

>EMBL\_CDS:BAG62150 BAG62150.1 Homo sapiens (human) hypothetical

protein

AGUCCUCCCCUAUAGGUUGAAAUGUACACUAUAAUACUAAUCUAAGUGUUGACAGAAAAACCUAU  
CGGAGUUAAGGACU

>EMBL\_CDS: BAG59519 BAG59519.1 Homo sapiens (human) hypothetical  
protein

CGGGAACCUUCCCCACAGGUCGAACUCCGGUGGGUCGACAGGCUCAGGUGCGUCCUCGACACUGC  
CAAGGAGCAACAAGUCGUCCCGAGAACCGAGUCCGACCUCUCUUGGAAGAGGUACUCCG

>EMBL\_CDS: BAG59120 BAG59120.1 Homo sapiens (human) hypothetical  
protein

ACUAAAAUUUCAGGAAACCUGACUAUUAUAGAUUAUGACAGGACAGGUGUCCCGAAAGUACUAAU

>EMBL\_CDS: BAG62911 BAG62911.1 Homo sapiens (human) hypothetical  
protein

CCGUCGAGAAAAACCUCCCCUGUCGAAGGACUCCUCUCCCCUGGGUGAAGGAAAAGUCGUCC  
CUCAACCCGUCCAUCGUCGAAAAGGACAACCUCUCCCCACCGAGGAACUGAGACAGGGAGUUUC  
CCUCCCGG

>EMBL\_CDS: BAG61567 BAG61567.1 Homo sapiens (human) hypothetical  
protein

GCCUCCCGACGAGUGGUGGUCGACCACGGAGACCCUAGGAAAUGUUAGGUGGUCAAUAACUGCA  
GAAACUCCCCAUUGUCCAGUGGACAACGACCACCCUCGACGGAGCCGGC

>EMBL\_CDS: BAG61509 BAG61509.1 Homo sapiens (human) hypothetical  
protein

GGUUUCGGUCCCAACCACUAACCACGUGGUGACUUCGUUCGUGACCACGACUGUCGUGGUGACUU  
CGACCGUGACCACGACUGCCGUGUCGGUUUCGACCGUAACCACAACUCACGUGGUGGUUUCGGUC  
GUGACCACGACC

>EMBL\_CDS: BAG62941 BAG62941.1 Homo sapiens (human) hypothetical  
protein

AGGAACCCAGGACCCACGGUCACCGAGGAACGAAGGGACCUCGUGGGACCCCAGGAACCU

>EMBL\_CDS: BAG62171 BAG62171.1 Homo sapiens (human) hypothetical  
protein

AUCGGAUCCUCGAACUGAUGCCCCACUGGCGGUCCCCGUCGAAACUGUCGAGGUGCCGACGGAAG  
ACAGAGUAUCACCCGGGCCACCACCCGAGAUCGAC

>EMBL\_CDS: BAG63132 BAG63132.1 Homo sapiens (human) hypothetical  
protein

UCUAGGGGACUUAGAGUCCGUCCGUAAAGAGACACCUUCCCGACAUGAAGACUCUUUCCCCUGAG  
A

>EMBL\_CDS: BAG59555 BAG59555.1 Homo sapiens (human) hypothetical  
protein

CCUCAGGCCUCAGACCAGUAGGGCCCCUACGUGCGUCCUCGAAGGCCCGUACCGCAACCCGUAC  
AGGACGAACAACCGUUUAUGGUCGUCGUGACGUAGGGCGUCGAGCAGGAGGACGUCGUAGAAGAC  
CUCAAGUAGUCGUCUAAGAACCUGGG

>EMBL\_CDS: BAG60174 BAG60174.1 Homo sapiens (human) hypothetical  
protein

CUCGUGUUGACAAAGGACACACACUACACAACAAGAGACCGACACGUGAAGGGUCACGGUUGCAG  
GUGUAUCCUGUCCACACGAA

---

>EMBL\_CDS:BAG61723 BAG61723.1 Homo sapiens (human) hypothetical protein  
UUGGGAACAAACUCGACUUCUUCGUCAAAGGCUCACCUACGACGGUAAGACCGUGUUCUUGUCCC  
CAA

>EMBL\_CDS:BAG62260 BAG62260.1 Homo sapiens (human) hypothetical protein  
GAGACCAUAUCGUCCCAGUAACCCCGGCGUCUCUUGACUCCGAAGGGUAAUUACUGUAACCAGAC  
CUACGGUCUC

>EMBL\_CDS:BAG59789 BAG59789.1 Homo sapiens (human) hypothetical protein  
AAACCAGUACAACAUCGAAGUUUGGAACAUCGAGUACCAAAAAGUUCAACGUUGUACAGGUCU

>EMBL\_CDS:BAG59777 BAG59777.1 Homo sapiens (human) hypothetical protein  
CUUCCGUUGACAGGUCCCCCUAAACAACCCAUAAAACCUUAAAAACUUUGACCUUCUCAACGGAG  
UCGUUAAAACACCUAUAACAGAAG

>EMBL\_CDS:BAG62660 BAG62660.1 Homo sapiens (human) hypothetical protein  
ACAUGUCCGACCAACCCCCCACAGGAGACACUACGUCACAAAGGAAACGGAGGCUCUCCUGGGUGG  
GACGGACCGGGGACACGU

>EMBL\_CDS:BAG61680 BAG61680.1 Homo sapiens (human) hypothetical protein  
CUACUUUCAACCCGACCGGUCACGGUACGUCCACCUUCCUGACGACCCACCGUGACAGUGGUUAC  
GACAGUAG

>EMBL\_CDS:BAG61884 BAG61884.1 Homo sapiens (human) hypothetical protein  
AACUUCGGCUGUCGACACACGACUCCCCGGAACGCUUCCCGCAACCAGUAGCAAGAGGCCCGGAG  
ACUCAUGAGGUCGACCUACCGAAACU

>EMBL\_CDS:BAG63104 BAG63104.1 Homo sapiens (human) hypothetical protein  
CGACGUCACCGAACCCGCAGUCCUCCGAGUGACUCCCCGGUGUACUGGGGUCGGUCACUGUCA

>EMBL\_CDS:BAG59267 BAG59267.1 Homo sapiens (human) hypothetical protein  
CCUUGUGUAACAACUCUAACAGUAACUGCUACUCGUCGAGGAGACAGUCGACGAGUAACCGCUAG  
ACUCCCUACUCGAGG

>EMBL\_CDS:BAG59479 BAG59479.1 Homo sapiens (human) hypothetical protein  
UUCUCUCUUCCCUAAACUUUACCUCAACCAGGGCUGCCAUCUGAUGAGCCCGAGCUCAGAGAAGA  
UAAAGAA

>EMBL\_CDS:BAG62102 BAG62102.1 Homo sapiens (human) hypothetical protein  
UCCUAGACUUCGGUUAUUUAUGACCCUCGGUAGCCCGAAAAGUAUAAAGGUAAACGGUUUGUAC  
UCUAAGA

>EMBL\_CDS:BAG61695 BAG61695.1 Homo sapiens (human) hypothetical protein

---

GUCGCUACAACCACCCGGUUUCGGGUCGGGACUUCUUCUCCCCGACCCCGGUGUCGUGGCGAC  
>EMBL\_CDS:BAG62265 BAG62265.1 Homo sapiens (human) hypothetical  
protein  
CAUGAGUAACUAUAACCACAAGUGCAGGACCUCUCCGUCUCUGUCGGGAGACUCCUGUCCUAUCC  
GUGACCGUAGUCCCUGACACAAGAGGUCCUAAAAGACGUCGUCGUCACCCAUG  
>EMBL\_CDS:BAG61782 BAG61782.1 Homo sapiens (human) hypothetical  
protein  
UAGAGGACCUAUCAGAAAACCCCGUGUGCCAGGAGGUCGGUCCCCUACCACGCGGCCUAGGUGAG  
GUCCUCCA  
>EMBL\_CDS:BAG62806 BAG62806.1 Homo sapiens (human) hypothetical  
protein  
GUCGUGGUCGAGGACGUCGUCGGUGGACCAGCGGCAGUUCUUCGUCUUUAACCCGACUGGUCCC  
CGACCCGAC  
>EMBL\_CDS:BAG60749 BAG60749.1 Homo sapiens (human) hypothetical  
protein  
CCUAACAACAGUCAAGUAAGUACCCCUAAAAGUUCUACCAGGAGAACUACUUGAGUCGUUGUCAG  
A  
>EMBL\_CDS:BAG60166 BAG60166.1 Homo sapiens (human) hypothetical  
protein  
ACUCUUUGGUCGACACACCACCCCAAAGGUCUCUUCUCCUUUAAGGAAGAAAGGACCUCUCGCAC  
GUCGACAUUGAGU  
>EMBL\_CDS:BAG62068 BAG62068.1 Homo sapiens (human) hypothetical  
protein  
CGGACCGGAACCAGGAAGACCGGACUUCUCUCGAGCGCCCGGGCCCGGAAAUAUUCGACGUCAU  
GUGGUCCCGGUCCG  
>EMBL\_CDS:BAG58809 BAG58809.1 Homo sapiens (human) hypothetical  
protein  
AGGACCCCAUAGACGAAGGUGUACUUAAGGUCAUUUCCGAAAUAUUCGUCCUCGAAAUCCU  
>EMBL\_CDS:BAG61318 BAG61318.1 Homo sapiens (human) hypothetical  
protein  
CUCUAAACUUGACUCUAAACGUCGGUAGUUUAAUGACAAUCAACUACCCACCGUAACAGU  
GUCUUGGAGGCGUUACACCUAAAAGAAAGUUCGGUAAUGUCAUACGACCCUACUACCCAAA  
CCACCAAGUUACCAUGUUCAAAA  
>EMBL\_CDS:BAG59722 BAG59722.1 Homo sapiens (human) hypothetical  
protein  
GGAACCGGCCCCGAUAAAGACAAAGACCCUCAACUCGGUACAGGAACUGACCCCGGUGGAGACGA  
AGAUUCCAUCACGAAAUAGGAACAGUUCUAGUGCAACCAAAGGCCCCCGUCACAGUACAGGGA  
CCGGUCCC  
>EMBL\_CDS:BAG61783 BAG61783.1 Homo sapiens (human) hypothetical  
protein  
CCCGAAGAGGACGGCCAACUACUUGAACUACCGGAGCAGGUGCGAGACGUGCAAGUGCACCCGU  
CCUACCCGGG  
>EMBL\_CDS:BAG61220 BAG61220.1 Homo sapiens (human) hypothetical  
protein



CGAGGUAGGUGUAAGACCUUUGCUACUCCCGUCACGGAAAGUGACGGGACUUGAACCCAGUCCUACA  
CACUUCUCA

>EMBL\_CDS:BAG59869 BAG59869.1 Homo sapiens (human) hypothetical  
protein

CGACCCUUCGGGUCCUAGAUCAGAGGUAGGUCCGAAAGGUCGAGACCCACCUUCAGAAGGAGAA  
ACGGGUCG

>EMBL\_CDS:BAG61084 BAG61084.1 Homo sapiens (human) hypothetical  
protein

AACAGGUGUCGAUCGACAUCUUAAGUAGGUCGACGACGGGACGUCCCACGAACAACUCCUCAGG  
ACGUUUCGUGAACCGUCGUCGCCACCUUCUUUUCCCCGUCGACACCGUC

>EMBL\_CDS:BAG59325 BAG59325.1 Homo sapiens (human) hypothetical  
protein

AGGUCCCUCAAACCCUUCUCAACAGAAGAUUCUACGAGGAAGAGUCUUUAAGAGAGUACCU

>EMBL\_CDS:BAG61661 BAG61661.1 Homo sapiens (human) hypothetical  
protein

ACCAAAAUAAAACUUCGAGAAACCUUCUUAAGGACAUUGUGAGUCGUGAGCUAUGUCCUUAAG  
UUUGUUUUCUGUUUAAGUUUAACCUUUGGU

>EMBL\_CDS:BAG58962 BAG58962.1 Homo sapiens (human) hypothetical  
protein

CCACCGACUGAUCCUCUGUUUAACGGUAGAGGUCAUCGACUACUUGUCUCCUGAGUCCGAAGAG  
UCGAAGACGACGUCCCUCACCUCUCCGACUCAUCCGACGAAAUCCAGUAUCACGAAAUAAGAC  
CUUCACGUAAUUAUAGAGGACCUGUUAGUAG

>EMBL\_CDS:BAG62164 BAG62164.1 Homo sapiens (human) hypothetical  
protein

AAACCCGUCACGUCCACCCGAGCGUCAAGAGGCGAAGAACC GGAGUGAUAAACACGACGGGUUU

>EMBL\_CDS:BAG60980 BAG60980.1 Homo sapiens (human) hypothetical  
protein

AACACCACCCGACGAGGUGUAGGAGUGUUGGCACGACCAGGACCCACCCUCACUUCGGGAGUAG  
CGUC

>EMBL\_CDS:BAG59420 BAG59420.1 Homo sapiens (human) hypothetical  
protein

AUACCCCGGAUUAUUAAGGUAAAAAGACAUAUUCGGUAUUAUUUGUCGUUCAAUACCCAGUAC  
GCCUAAGAUACUCCGAAGUAC

>EMBL\_CDS:BAG62711 BAG62711.1 Homo sapiens (human) hypothetical  
protein

CGGACUGGGGUCCUGGACCAAAAGAGACUUCUUCGUCUUGACCUCAACUUGUAGGUUGGAGACAC  
CUCUCUCGGCCCAGAGUGUAAAGUCCG

>EMBL\_CDS:BAG61734 BAG61734.1 Homo sapiens (human) hypothetical  
protein

AGUGUCCCCGCCAGACCCACCAGCGUCCCAACCAUCAACAUGUGAACACACCUUCUCAAUAGAAA  
GAAGUCGACUUAGAAGGACGUCACACGUCGGGUGUUAGACACGAAAGAAAAGAAGACACU

>EMBL\_CDS:BAG60578 BAG60578.1 Homo sapiens (human) hypothetical  
protein

GACCUCGUCCCAGGGAACCGGUGUUCACGACCCUACGAGACAACCAAGAACGACUGGGACUACGA

---

CCACGACCCGGACCCAUCCCCGGAACGACGGUC  
>EMBL\_CDS:BAG61098 BAG61098.1 Homo sapiens (human) hypothetical  
protein  
GGGUUCCAGAGUCGAGGUCAUAUCCUCCGUCUCGACCUUUUGAAAACGUCCAGGUCGAGACACGU  
AAGCUACCCCGACACCUGGGUCACCC  
>EMBL\_CDS:BAG59084 BAG59084.1 Homo sapiens (human) hypothetical  
protein  
CCGACUACAGUCGUCGUACCUCGUCUAUCUCUGUCCCGGAACCCGAACAGUUAGGAGAGGUCGACA  
ACGUUCCGA  
>EMBL\_CDS:BAG62127 BAG62127.1 Homo sapiens (human) hypothetical  
protein  
AGUAGUCCUCUCAAGGAACUCGGUAAGUGGACCCGAUCCCAAUGUAAGGUAAAACUACCACUGGGA  
CCGACCCCAACUCUGUCGGUUAGGACGACU  
>EMBL\_CDS:BAG64836 BAG64836.1 Homo sapiens (human) hypothetical  
protein  
ACAUGUCUUUAGACAGGGUAAUUAUCGUCAACAUCAUAUACGUAAGACCAACUCUACCUCGUCCA  
UAAACAGU  
>EMBL\_CDS:BAG65121 BAG65121.1 Homo sapiens (human) hypothetical  
protein  
ACCUCUACUCCAUCGACGGUCCACGGUACCCCAUAUCCACUCGCGCCAUCGGGAGUCCCGUGAGG  
ACCGUJAGGUAGAAGU  
>EMBL\_CDS:BAG64320 BAG64320.1 Homo sapiens (human) hypothetical  
protein  
GAGACUCCACCCAGCGUGACGACCCAGACGGAGGGUCGUAACGACGUAGUGAACCAUGUCUC  
>EMBL\_CDS:BAG63685 BAG63685.1 Homo sapiens (human) hypothetical  
protein  
CUCGAGUAUCAGAAGGACCGACGACCGACAGUCACUACCCCUGCGUAACUGGAGGUCCUCGGUGC  
CGAACUCCAG  
>EMBL\_CDS:BAG36645 BAG36645.1 Homo sapiens (human) hypothetical  
protein  
CCGACCUACAACACGAACUACGAAAGUAAUGAAGACAGUUGUUGUCGACCACUACUCCUCGGCAA  
AUAAGUUGAAGUCGA  
>EMBL\_CDS:BAG64189 BAG64189.1 Homo sapiens (human) hypothetical  
protein  
CACGGGAACGGUAGGUCACCCUGAUACCCUAUUACCGUCAAGAGUGUGUGUAGCUACAAAAGGUA  
GGUCAGUAGAAGGCCACACUCGACGUCGGUGUCGGGUACCAGGGACUCCCUUACCUUCUCCCC  
G  
>EMBL\_CDS:BAG64538 BAG64538.1 Homo sapiens (human) hypothetical  
protein  
AACCCAGGACCAUUACUAGCGUACAUGAGGUGUGUGGUGACACCUUAGACACAACAAAAUGGUCU  
GGGUC  
>EMBL\_CDS:BAG63986 BAG63986.1 Homo sapiens (human) hypothetical  
protein  
UCCUACCGUUGUGGUGAAGAUAUUCGUGUCUUCUUGAAGUCCGAAACGAAGCCUUCACCGUGGUAC

GAUAGAA

>EMBL\_CDS:BAG35483 BAG35483.1 Homo sapiens (human) hypothetical protein

CGGGUJAAAAGAGGUAGUCCGACAGAGACUAACACGACUGACACAGAAGUAGUGUAAGGUCGUCC  
GAAGCCUGUUCAGACAAUAUCAUAGACAACCUCUUCACUAACCCG

>EMBL\_CDS:BAG64566 BAG64566.1 Homo sapiens (human) hypothetical protein

GAACCGUUGGUACACCCCCGAGUGUCUCGACAGCUGAGUCCCGGUCAGAGACUUUCGGAAGUGGU  
ACCAGUCACGACUC

>EMBL\_CDS:BAG36692 BAG36692.1 Homo sapiens (human) hypothetical protein

GGUCCUUAUUCUUUCUCCUACUCAUUGUCCUACACACGGUCCUGACGACGUAUUGUAGUAAACC  
GUCAUCUUUCGCCGUGUAUAAGCGCCAGACCAACAAUAAAAACC

>EMBL\_CDS:BAG35778 BAG35778.1 Homo sapiens (human) hypothetical protein

CCGACAACUACAUCCAGAACCUCAGGUUCCAGUCUCAGUGAAGACUAUGAACUGGAACCUAGACG  
CUCCAGAAUAACUCCAG

>EMBL\_CDS:BAG64784 BAG64784.1 Homo sapiens (human) hypothetical protein

GUUCCACAGGGAUACCGGUCCAGACCCGACACCUUCUAGACUCUCUGACUCCACUGUGGAAAC

>EMBL\_CDS:BAG34957 BAG34957.1 Homo sapiens (human) hypothetical protein

CCCUGCGUAACUGACGGAAAACCGACCGUCGUGACCAAGACAAAACCACCCGUCGUAACUAACGG  
AAAACUGACCGUCGUGACCAAGACGACACCACCCGUCGUAACUAACGGA

>EMBL\_CDS:BAG63386 BAG63386.1 Homo sapiens (human) hypothetical protein

ACGGGGCUCAGGUCGGAGAGGAGUCCAGGCCGUGUGAGUCAAACGUCGACCCCUCUCCCUACCA  
CGCCCCGU

>EMBL\_CDS:BAG36091 BAG36091.1 Homo sapiens (human) hypothetical protein

GGCCUCUGAAACCCACCUCGUCGGGUUAUAGUUAGAAGAGAAACCCUAGACAGAAGAGGGGCU  
UUAUGAGAGCC

>EMBL\_CDS:BAG65367 BAG65367.1 Homo sapiens (human) hypothetical protein

CGGACGUCGGUGAAGAAGGACUCCUGAGUCCAGUACCGGGACGGUCGGUGGUCCACCAACCAAC  
CCCGACACGAGAGUCCUCGUCUCCACACGCGUGUCCA

>EMBL\_CDS:BAG64234 BAG64234.1 Homo sapiens (human) hypothetical protein

CUCCCCGCCUCCGUCGACCCAACCCGAAGGAAUCCGUCCCCGGUCCACCCGUACCAACGGAG  
GACACGGGAG

>EMBL\_CDS:BAG65426 BAG65426.1 Homo sapiens (human) hypothetical protein

GAGGUGGUUCUUUCGACCCCUCUCCCGUCCAGUCUCCCCGUUCUGAAAAGAGGUCCCUACGAA  
AGAACCCCCUC

>EMBL\_CDS:BAG65387 BAG65387.1 Homo sapiens (human) hypothetical protein

UCUAUCAAAACUUGGAAAAACCUCCACAGAAAGACUCUUAGUAGGAAGAGCAAAAAUAGGACCUAU  
ACCAACUCCGAUAGA

>EMBL\_CDS:BAG63854 BAG63854.1 Homo sapiens (human) hypothetical protein

CUGGAAGACAUCGUGGGUCGGUACCUUCUACCGUGAGAGUAAGUGUCACACGAGUGGGUACCGUC  
CCCCGUCGUCACCCAG

>EMBL\_CDS:BAG64988 BAG64988.1 Homo sapiens (human) hypothetical protein

CCUAGUCGUAGUAGGUACCGCCACGGUCACCACCACGGCAGGUGUCACCCCGACCGUGACGACCG  
UGACAGCACCAGG

>EMBL\_CDS:BAG63267 BAG63267.1 Homo sapiens (human) hypothetical protein

GAGGGCUCGGAGACCCAGAAACUCUGGAGACACCGGAAACUCUGGGGUCUCCGAAAACUC

>EMBL\_CDS:BAG63399 BAG63399.1 Homo sapiens (human) hypothetical protein

AGACUCACGUUCGUACCGGACCCACUGGUACAACCCGAAGUCGUUCCACGGAAGGUCCAUCUAC  
ACCACCAGUGAGUCU

>EMBL\_CDS:BAG35659 BAG35659.1 Homo sapiens (human) hypothetical protein

CCUUGUCCAAUAUCUCUACUUUGAAGUUUCGAAGUGAGAAGUCAUUCGAUAUUCGGUAGAGACA  
UUCUAACUAAGG

>EMBL\_CDS:BAG35102 BAG35102.1 Homo sapiens (human) hypothetical protein

GUGGAAGAAACGGGUAGUCGUUCUGAUCGCAGAACAGUCAGAACCACUGUCACUGUAACUCCAC

>EMBL\_CDS:BAG64453 BAG64453.1 Homo sapiens (human) hypothetical protein

CCUUCCCUUCUCCGGGUUCUCCGAAGGACAGGGGAACCCCGUCGUCUCGGUUUACGAACCCGUG  
CCCGGGUUCGACGGACGGGACGUCCCAGGUCCUCCAGGACUACUCAGGACGGGGAAGGGAAGG

>EMBL\_CDS:BAG63864 BAG63864.1 Homo sapiens (human) hypothetical protein

CACGUAGUUAAUAAUUUACCAUAACUCUGUUUCCAGAAAUUCAGGUUCUUCUCGUGAAACAAU  
UGGGGUCGUAACAUCACUACGUA

>EMBL\_CDS:BAG64667 BAG64667.1 Homo sapiens (human) hypothetical protein

CUCCACCAAUCACAAAUAAGUCCGUAGUAAUGUUUUACAGACUAGACAAGAUCUUGUGACUAGU  
CGGAG

>EMBL\_CDS:BAG36301 BAG36301.1 Homo sapiens (human) hypothetical protein

CCGGAGACCGUCCGGAGACCCGUGACGUAGUCUCGGACACGGGGAACAGAACAGGUCUCCGG

>EMBL\_CDS:BAG65215 BAG65215.1 Homo sapiens (human) hypothetical protein

AGAAAGACCUCGUUAAUUUCCAAGUACCAAGGCAAUAAGGGUGAAACCUUCGUUCUUGGAAACU

ACAGAAGUCGUUCC  
>EMBL\_CDS: BAG64492 BAG64492.1 Homo sapiens (human) hypothetical protein  
UCGAAGAAGUCGAUAGGCAACCCUJACACAAAGAGGUCCUCAAAGGGCCGCUAUAGUAUCGAC  
GACUCCGA  
>EMBL\_CDS: BAG63777 BAG63777.1 Homo sapiens (human) hypothetical protein  
ACGACCCCAGCGUCUGUCCCAGUUUCGGCAGGUUACCCGUCUCGUCGGAGGUACGUCGAACCU  
CUGUCGAGGUCGGGUCCCACCCGUGACCAGACCACACACUACGGGCGU  
>EMBL\_CDS: BAG35982 BAG35982.1 Homo sapiens (human) hypothetical protein  
CUCUGGUAAAGGGGUACACUUUGUAGACCGAACGCUGUCCACUAAAAAGUGUCCAUCCUCCCGA  
ACCAGAG  
>EMBL\_CDS: BAG36045 BAG36045.1 Homo sapiens (human) hypothetical protein  
GUCCUCGACCCCGACCUUGAAGAAGACCGUAAACGACAAGUAAGUGUUGACGGUAUAAUCCUCGA  
AGUCGGUAGUCAACAAC  
>EMBL\_CDS: BAG64969 BAG64969.1 Homo sapiens (human) hypothetical protein  
GGACCUGUCGGGACGCGACCCAAUUCUUACACAGAACGUACAGUUUCUGGCCACGUCGCCGAAG  
AACC  
>EMBL\_CDS: BAG63766 BAG63766.1 Homo sapiens (human) hypothetical protein  
GGGUCACAAGUCGAACCCGAACAACAACCCACUCUACCAUUGUUCGGAGGCCUACUGUGACCC  
>EMBL\_CDS: BAG65551 BAG65551.1 Homo sapiens (human) hypothetical protein  
CUUCCCCACAACCCUCGGUAGGUUCCGGGGUGACACCGACACGUCGUCGACGGCUCGUAGGA  
CCUACCGAAACCACUGUCGAGGGGAAG  
>EMBL\_CDS: BAG65101 BAG65101.1 Homo sapiens (human) hypothetical protein  
UGAGUCCAGUCGCGGUAAGAAGAGGAGGUCCUACCUGUGGUCUAACCGGGUCCUCCUCGUGGC  
CACCACGACCGGUGUCUCA  
>EMBL\_CDS: BAG64658 BAG64658.1 Homo sapiens (human) hypothetical protein  
GAAGAAGGACAAGAACAAGGAAAAGGACACAAUUUUUACUUGACCCUAACCUUAAGAAGUUAU  
GUACUCCUUC  
>EMBL\_CDS: BAG63325 BAG63325.1 Homo sapiens (human) hypothetical protein  
CGGCACUAGGACACGAAGAGCAGCGGAGCGAGGUCCUCGCCUACUCGUCCAUCUCCUACGCCG  
>EMBL\_CDS: BAG36590 BAG36590.1 Homo sapiens (human) hypothetical protein  
CCGAGGGACUCCUGAGACCCUCCUGGACGACUGAGUCGUCGUCGUGAAGGAGGUCCCACGGUC  
CCUGG  
>EMBL\_CDS: BAG63870 BAG63870.1 Homo sapiens (human) hypothetical

protein

UGUCGGUCUUCGAGGUGUCCGAGGCACAUCAGGACCCCGAGGACCUACCUUUGGGCCCGACGCGC  
CGAGAGGGACACAGGACGCGACA

>EMBL\_CDS:BAG36246 BAG36246.1 Homo sapiens (human) hypothetical  
protein

GUGCGGCJUCCCCGACGUGCGGACCUCUUCSCCCACUCAUAAAAAAUAGCCACCCGACCUUCUUC  
CGUACGAGUUAGGUCCGCUCGAGAGGCCACAC

>EMBL\_CDS:BAG35665 BAG35665.1 Homo sapiens (human) hypothetical  
protein

AUAUCGUAAAGUCAACGGACACGUUCUUGAACCCCAUCUCUCGGUCCAACUCAAACGUGUCAAG  
UUACUCCUCACAACAC

>EMBL\_CDS:BAG35966 BAG35966.1 Homo sapiens (human) hypothetical  
protein

CCGAACCUGAAUAACAUGUGGUCGAGGUACGAGAGGACACCUCAACUCUCGUACAGGUCCGA

>EMBL\_CDS:BAG64463 BAG64463.1 Homo sapiens (human) hypothetical  
protein

AAACCUUUGGUCACUUUUAGUUAUCCCAUUUAUAGUAGUCCUUCGAAAUGAUAACUCAACAAAG  
UGACCAAUUGUUC

>EMBL\_CDS:BAG36729 BAG36729.1 Homo sapiens (human) hypothetical  
protein

CCCACCCCGACCCCAACCCUUUUCGGUAAAGGACUCUUCACAGGCCGAGGACCCAGAGUGAG

>EMBL\_CDS:BAG36728 BAG36728.1 Homo sapiens (human) hypothetical  
protein

GACGAGGGGAUACUCGUGGUGAGCCAUCAUCCACAAGGGACUGAGUCUCCUCUACUGACUCAGAC  
ACCUCAGUCUCCUGGUCGAAGCCGCCGUCACCAGGAGUCCCAUCGUC

>EMBL\_CDS:BAG36475 BAG36475.1 Homo sapiens (human) hypothetical  
protein

AAACUACUCCUCUCCACUUCUCUUCSCCGUCUUUCACAAAGAAGAACAAGUUAGAGAAAAAG  
GUCGAAAUAGUUU

>EMBL\_CDS:BAG36715 BAG36715.1 Homo sapiens (human) hypothetical  
protein

CGAACUGUCCUACACAGGUCCUCCGGCAGGAAAGGAGAAAAUCCUUCSCCCGAAGGAGCUACCC  
GUGUAAGAAGAAGACG

>EMBL\_CDS:BAG64621 BAG64621.1 Homo sapiens (human) hypothetical  
protein

GACGUCUCAGACCAACCGACAGAGGUCUUCGAGGAGCCUCGAGAGGUCCCGGGCGCACGUCCGUC  
GGUCGACCAAGACGUC

>EMBL\_CDS:BAG64291 BAG64291.1 Homo sapiens (human) hypothetical  
protein

GACCACGCAAAGAAGGAGGAUGCCGAGUUCGGGAGUUAAGGACCUCUUAAGUCCCGUGAACCCGA  
CCUCUCCUGCUUAGUC

>EMBL\_CDS:BAG35520 BAG35520.1 Homo sapiens (human) hypothetical  
protein

CCCAGACCAAGAACAUAUUCGACCGGCCGGUGGAGGUCCAGCGUCUCGUCCUCUUCGACGCG

---

GGCAACAGGAGACCCCACCGGAAGUCGUCCUCGACCCGGG  
>EMBL\_CDS:BAG65220 BAG65220.1 Homo sapiens (human) hypothetical  
protein  
AAACUJACACUAGUAAUUCGGUACUCCUAAAGAUUCCUAGAAGGUGUAAGAAAUGUAAGUUU  
>EMBL\_CDS:BAG35534 BAG35534.1 Homo sapiens (human) hypothetical  
protein  
CGGACCCGACACCAUUCAUUACCUCGACACUCAAGGACCUACCACUGUGCCAGGUCCUAGAACUU  
UGAGCACAGGUCAAAGUCCCCGACCGACGUCGCGACCG  
>EMBL\_CDS:BAG63921 BAG63921.1 Homo sapiens (human) hypothetical  
protein  
CCAUAACAUCACGUUGUAUACGUUCGGAUCAAGGAAAUGAUAGAAAGAGGAAAAGAAAUAUAG  
GUUUCUCCUCCUUUCAGACCCUGAACUUCGACUUGCACAUUGUGGACGUCAUAG  
>EMBL\_CDS:BAG35780 BAG35780.1 Homo sapiens (human) hypothetical  
protein  
AACCCAGUCUCAACACUCGAACUUCUCGCAAGUGAUUUACAGAGGGUGACGAGUGACGAGACUA  
AGUC  
>EMBL\_CDS:BAG64635 BAG64635.1 Homo sapiens (human) hypothetical  
protein  
CAUGAGACAGUGGUACUAUAAAAGUCCCGGCGGUGUGUCUGCGGUACGUGCUUCCGGUCCACGC  
ACACCCUCUGGACCGAGUACUCCGACCGACAGAGCAUCUUCGGUCCCGCUACAGUACCACUGAU  
CCCAGG  
>EMBL\_CDS:BAG63996 BAG63996.1 Homo sapiens (human) hypothetical  
protein  
CCCCGAGGACCAUCGACCCGUCCUAGAACUCCUACUGUGACGGUGACCGUAACGCGUCCUCGAGG  
>EMBL\_CDS:BAG63418 BAG63418.1 Homo sapiens (human) hypothetical  
protein  
GGUACGUCGAGCAAGAGGCACGCCUCGGUCAGGUCGUCGCCGAACUUCAUCGAGUUGUACCGGCU  
CCGCGAGUACAACCCGACCGGGCACUAGUCGACGUACC  
>EMBL\_CDS:BAG36359 BAG36359.1 Homo sapiens (human) hypothetical  
protein  
GAGGAAAAAACAGACACCAAAAUAAGAAGACAUAGACUAUUCUGUCAAAAUCAAGAAGUACAC  
GUCAUAAUAUCCUAGUUACUCUGAGACUCCUC  
>EMBL\_CDS:BAG36248 BAG36248.1 Homo sapiens (human) hypothetical  
protein  
CCUCCCCGAAGGAGGUGACCCUAUAUUCUUACGACUUGAUACUCGAAGACAAGAAAAAGGUACCU  
CUCCAAAAAGG  
>EMBL\_CDS:BAG65567 BAG65567.1 Homo sapiens (human) hypothetical  
protein  
GGUCGUGGAGGGCUAGGGAAGCAGUCUCGAGGUCGACGACGCCGCCGCAAGACGAACUACCCC  
UACCACGACC  
>EMBL\_CDS:BAG36687 BAG36687.1 Homo sapiens (human) hypothetical  
protein  
CCCAGAGCCCAAGGUGGACUGAAAAGGUCAACAGACCUUCCCCGUCCACCACCAACCCCGGA  
>EMBL\_CDS:BAG65615 BAG65615.1 Homo sapiens (human) hypothetical

protein

UAGGCGACGUAGUAGACCCGCACGAGCCACUGGUCAACGGCGUCCAGUCGGUAGAAGACGUCGUC  
GAACCCCUUCUCCAUGACCCGUAGUCCACCAACCGGACGUCCACCUUAAGCUCCCGUGCGUCCU  
ACCACAGGACCUA

>EMBL\_CDS:BAG63827 BAG63827.1 Homo sapiens (human) hypothetical  
protein

AACGUCCCGACUUGUCCAGGUUAUGUCAUAUCUCUCGUUAAACUGGUGUUCUGGGACUCAAGU  
CUGAACGUU

>EMBL\_CDS:BAG65558 BAG65558.1 Homo sapiens (human) hypothetical  
protein

GGUCGAGGGGUCUCCACGACUCGAGGCGUCUCGGUAAGUCGUAGACACGUGACCCUCGACC

>EMBL\_CDS:BAG35671 BAG35671.1 Homo sapiens (human) hypothetical  
protein

GACGCCGACUUCAACGCGUACGUCUAGGCUGUGACCUUCCCGAAUACGGGUCACACCUAAGCCUA  
CACGGCACAGUCGAGCAGUC

>EMBL\_CDS:BAG65475 BAG65475.1 Homo sapiens (human) hypothetical  
protein

CCUACGACACGAACCCGACAGGUCCAGAAAGAGGAGGAAGGACCUCCAGAACUCUAAGACCUUA  
GAGACGUCCGCAAG

>EMBL\_CDS:BAG36498 BAG36498.1 Homo sapiens (human) hypothetical  
protein

GCGCGCCCAACUCUGACCCGGGCGACGAGCUUUCGCCGAAGCUUCAGCAACCGGGGUCUUGUCACC  
CCGCAGAACAGGUCGCGC

>EMBL\_CDS:BAG35884 BAG35884.1 Homo sapiens (human) hypothetical  
protein

AGUGUCUCGAAUUAUAAAGGUGAAGACAGGUCUUCUUAUAACCUUCCAAACUAUAGAGACACU

>EMBL\_CDS:BAG36104 BAG36104.1 Homo sapiens (human) hypothetical  
protein

CUGCAUCUUCUCCUUUCCAGACACGGUAUCAUGUCACAGAAUACCAGUUCUUGUGAACCGGU  
UUUCUGUGUCCAAGACCCUUAUUGAGAACAAGAAUGCAG

>EMBL\_CDS:BAG36383 BAG36383.1 Homo sapiens (human) hypothetical  
protein

CGUCGACGGUGUCAGAGAAGGAGUCGGGUUCCCCAACCAAAAACCAAGUAACUCAUACUCUAACA  
CCCGUCAAG

>EMBL\_CDS:BAG35761 BAG35761.1 Homo sapiens (human) hypothetical  
protein

GGACGUCAAAGACACUGAAGGAGGGGACCUAACAAGACCCGACGAAGACCCUGUUGAAGGUUUCU  
ACUCCUCCCAUCUUCGACCCCC

>EMBL\_CDS:BAG64651 BAG64651.1 Homo sapiens (human) hypothetical  
protein

CUCGUUGACCCAGAGGUACCCGAGCGACUACGACCAUGGUCCUCAUCCGGGACAGUCGUCCCAAC  
CACUCGUGACACUACUAGAACCGAG

>EMBL\_CDS:BAG63310 BAG63310.1 Homo sapiens (human) hypothetical  
protein



GCACAUCCCGGAGAGCGGUCACACCCAAGCGACCACUUUAACCUCGGAUUUAUUCGACGUAC  
>EMBL\_CDS:CAD92497 CAD92497.1 Homo sapiens (human) pseudogene similar  
to part of  
AGUCGCAGAACGAGAGGAGGACCAUUGUCGUCGGUCUACGAGAAGUACUCCAGCCGACGGUCCUA  
CUUCAAGGACUGCGACU  
>EMBL\_CDS:BAG37573 BAG37573.1 Homo sapiens (human) hypothetical  
protein  
GCCUACCGUAGGUCAUACUAUGAAGGAAGAAACGACUUUAUUCUUGUCGUACCCCUAGAACUACAG  
UAGAC  
>EMBL\_CDS:CAQ07637 CAQ07637.1 Homo sapiens (human) MAGE (Melanoma  
Associated Antigen)  
CCACGAACUUCAGACGAGGAGAAGAACCUACGACCUCAGAAGUAGUCCACACGAGGUGCUUCAUC  
UCCUCCUCCUCGUCCUCGAACCUCUGA  
>EMBL\_CDS:CAI42087 CAI42087.1 Homo sapiens (human) melanoma antigen  
family C, 1  
GACUCAAGAGAGUCUCUUUGAGACCUUUUCUGAGUCAUUUCACCUCCUCCUCCUCCCGAGUGUC  
CUUAGACCUCUCCUCUGACCCUCAGGAGGGGGAGUCCUGUUGAGACUCCUGAGAGUCUCCUUGAG  
ACCUCUUCUGAGCC  
>EMBL\_CDS:BAG38101 BAG38101.1 Homo sapiens (human) hypothetical  
protein  
CGUCUUCGACGUUUACGGAGAACCUCUUCUACUCUUUAGUCACCUGAGGGACCCCGACUUCAU  
CAACGACG  
>EMBL\_CDS:BAG37649 BAG37649.1 Homo sapiens (human) hypothetical  
protein  
UACAAAGUACCGGAGAAGUCGACUUUGGAAAAGAAUCUAAGUAUGACUUCUUUAAAACAAUAGU  
UGAGUUAAGGAAGUCUCAGAUUGGACCCACGCACCAAUUAUUCUCCGACACCAAUA  
>EMBL\_CDS:CAQ07541 CAQ07541.1 Homo sapiens (human) MICAL-like 1  
GUCACCGCUACCAUGUCGGACGGCAGUCGGUCCAUCGCGACGUGGUUCACGUGUACGACGACCGU  
CCGACGCGUGCACGACGAC  
>EMBL\_CDS:CAQ09093 CAQ09093.1 Homo sapiens (human) structural  
maintenance of  
AAUUGAUACAAAAGUACUACUCUGUUUCUGAGAGAAAACUGUGAGUUUAGGGUAUAGUGUACGAG  
AUUGAACCACAAGUCCUCUACUAGAAAAAGAGUAAUACCAUAUCAACU  
>EMBL\_CDS:BAG37533 BAG37533.1 Homo sapiens (human) hypothetical  
protein  
CAAGACAAGGUACUUCUCAGUGCACUCAGAAGACUCAAUUUAACCGUAGGACAGGACCAAAAUUC  
GGUCGUCACUCGAAGUGUAGAGACUAAACCCAGAAAAGUACCCUGACUUG  
>EMBL\_CDS:BAG37303 BAG37303.1 Homo sapiens (human) hypothetical  
protein  
CAGGUGUUCUAGAGGGACCGAUGCUCUAGAGAAACUCACUGGUACUCUAGAGAGACUCACUGGUA  
CUCUAGAGAGACUCACUGGUACUCUAGAGAGACUACCGGUACUCUAGAGAGUCUG  
>EMBL\_CDS:CAI42601 CAI42601.1 Homo sapiens (human) melanoma antigen  
family C, 3  
CGGAGUGGAGGGAGUCUACGGGUUCUACUUUCCGUCUUUAUCAGGAUAGACACCGGAAAAAGGCC

CCGACCCCGACUCCACCCUCG  
>EMBL\_CDS:CAI22918 CAI22918.2 Homo sapiens (human) meiosis inhibitor  
1  
ACAGACCACUUGGACGUUUGACGGGAACACGACGACCCGUCUCUCCUCCGUCACUCGUCGGUCC  
GU  
>EMBL\_CDS:BAG36941 BAG36941.1 Homo sapiens (human) hypothetical  
protein  
CUGGAACCACAGUUUGACACCGUCUACCACCUAUUUUCUGACAUGUUGGGCGACAGGUACCAAGAU  
GGUCCAG  
>EMBL\_CDS:CAI21838 CAI21838.1 Homo sapiens (human) RASD family,  
member 2  
CCGCCGUGUCGAGCGGCACCAGCAAGAACAACGGUGUCUACUGGUACCCGUCGAGGCGGCGG  
>EMBL\_CDS:CAA15949 CAA15949.1 Homo sapiens (human) E2F transcription  
factor 2  
GAGGUCGUCCGACAGUCAUCGGAGGUUCCCCUGGUCCUACCUCGCCACCCCGGACGACCCC  
>EMBL\_CDS:CAI22034 CAI22034.1 Homo sapiens (human) DEAH  
(Asp-Glu-Ala-His) box  
UGGUAUUUCAGGAAUAACACAAACUAUUUACGAAGUAUAUAUAACUCGUAUCACUCCACCA  
>EMBL\_CDS:BAG37899 BAG37899.1 Homo sapiens (human) hypothetical  
protein  
CGGAAACGGAGACGAACCCGGACUGGGAGCUCGAAGCCCCUAUCACCUCCAACUCGUUGACCAU  
UUCCG  
>EMBL\_CDS:CAA16670 CAA16670.1 Homo sapiens (human) hypothetical  
protein  
GGGUCCCCGUAGCCCGCAAGACCUCUCCCCGGACCGAGGACCCUCUUCGGUCACGACCCUGUCC  
CGAGGACGUGUGCCUUUGAAGGUAACCGACGAGGAGUCAGGAGGGCCACAGUAAGACCC  
>EMBL\_CDS:CAB36861 CAB36861.1 Homo sapiens (human) POM121 membrane  
glycoprotein-like 2  
ACUCGGGUGCCUACCUCUGAAGAGAAGUCGCCGGGUCGGACCCGUGUUUUCUUCACUCCCAAG  
GUAAAAAGUAGUCCCCGAAU  
>EMBL\_CDS:CAQ07960 CAQ07960.1 Homo sapiens (human) cadherin, EGF LAG  
seven-pass G-type  
CGGGUGUCCGGACAGGAGUGACUGUGAGUGACACAUUACCCUCGAGACUUUCUGUCCGGACCCC  
A  
>EMBL\_CDS:CAI22773 CAI22773.1 Homo sapiens (human) chromosome 1 open  
reading frame 32  
UCCCCUACCUCAUUCGCCGCCUUGUGGCCUCUGUCUCCUCCCAUGGGCCGGAAACGACGAAAG  
GGA  
>EMBL\_CDS:BAG36963 BAG36963.1 Homo sapiens (human) hypothetical  
protein  
GGGUCCUCCCGUCCAGGUGCCCCGGCUCGGGCGAGAACCCUCGCGAAGGAGAAAAAGACGUC  
CCCGAAGGACGACAGGACCGAGAAGGACCC  
>EMBL\_CDS:CAQ10440 CAQ10440.1 Homo sapiens (human) BAI1-associated  
protein 2-like 2

CCUCCAGUACCUCAGUACCCCCAGUGCCCCCAGUACCCUAAGUGCCCAGGGGAGGAGGUCUCGGA  
AG

>EMBL\_CDS:BAG37475 BAG37475.1 Homo sapiens (human) hypothetical  
protein

AGGGUCACUUUAUCUCUUGUGGUGUCAUUAUGACUAGAAACCCAUAGUUGGACUAUAGUUAAGAA  
GACACACCUAUAAGAAAAAGUAGUAAAAAUGACCCU

>EMBL\_CDS:BAG36854 BAG36854.1 Homo sapiens (human) hypothetical  
protein

UCCUCACAAACGCCCCUCCGGGCUCCAGCGACACAGGCCCCGUCUCGCCGGCCAAGCAGGGCU  
CAGACGCGAGAAA

>EMBL\_CDS:BAG37025 BAG37025.1 Homo sapiens (human) hypothetical  
protein

CGACUCCUGACCCUCCUAUUCAGGAGUCUAGACCAAAAUCGAGGCGUCCGAGUAGGAAGCCCAG  
GAGUCA

>EMBL\_CDS:BAG37096 BAG37096.1 Homo sapiens (human) hypothetical  
protein

CGUCCGUUUAAUCUCCCUCCAUUCCUCAAGGAACUAAUGAAACUAAAAGAGAGAUUUGAGGAC  
G

>EMBL\_CDS:CAD92504 CAD92504.1 Homo sapiens (human) Fanconi anemia,  
complementation

CUCCUCGGGUGAAAGGCCGUCGCUACCGGCUUGCCGGUAGUCGUCCUGUAGUCCAAGGAG

>EMBL\_CDS:BAG38131 BAG38131.1 Homo sapiens (human) hypothetical  
protein

GGUCUCCGUUCCUUUCGUCCGCGAGUUGGUGGAACCCAACUGCGAACUACAGGACAUUGUAACAG  
UGACC

>EMBL\_CDS:CAQ10327 CAQ10327.1 Homo sapiens (human) crystallin, beta  
B2 (CRYBB2)

CCAUCGGUACCCGCACCUUCGACCCAUGUAGCAGUAGAUACUAAAGGUAGAAGAAGGGCCACUUC  
AACCCCAAAGUAUCUCCUACUAGAACACGAGAACCGACAGGUGAAACUACCCGG

>EMBL\_CDS:BAG37516 BAG37516.1 Homo sapiens (human) hypothetical  
protein

GACCUCAAGUAAUCCUAAAACCAAAGAGAAAACUCAGUAGGAGAAUAACUCUUAUCGUAUCAA  
GACCUGAAGUC

>EMBL\_CDS:BAG36983 BAG36983.1 Homo sapiens (human) hypothetical  
protein

CGGUACAACGGGUCUUCUCCUGGUCUAGAUUGGUCACGAGUGACCAAUCCUGGUCUGCAAGGAAG  
GACCAUCGAGGACCG

>EMBL\_CDS:BAG38048 BAG38048.1 Homo sapiens (human) hypothetical  
protein

UAGUUGUAUCGAACAAAUAAAAGACGUUAAAUAGAAGUUCUACAAAGUACAUAUUUACACUCUUG  
UAGAUCUAAGUACCUAAGAACUUCUCAGUACGGACCUUAUCCAAAACUCCUA

>EMBL\_CDS:BAG37908 BAG37908.1 Homo sapiens (human) hypothetical  
protein

GAAGAAGGUCAGUAGGACUCCAUCUAUAGUAUGUCCUACGACCCCGGAAUACCGAAUGUCGUUA

GGUCAUACUAUAUUUUUCUACUAACCUCCAAUC  
>EMBL\_CDS:BAG37745 BAG37745.1 Homo sapiens (human) hypothetical protein  
GACUCCGUGACCGACCACUGCGAGACCCUCGGGUCCAGGACCCUCACGCUCAGCCACAGACUC  
>EMBL\_CDS:BAG37560 BAG37560.1 Homo sapiens (human) hypothetical protein  
AUAUCUCUAGGACCAGAUUUUUGACUCCCUCUUCGAAACGGUUCUAGAACCGACAUAAAAGUGAG  
UCAAGUCUCCGAAAUAU  
>EMBL\_CDS:BAG37871 BAG37871.1 Homo sapiens (human) hypothetical protein  
UACCCGAAAGAGAUACAACACACAAACGACUACAAAUCCUUAACACUGAACCACGACUACCCAA  
AAGAUGAAAGUCCCUUAAGUUAAGGCAUCCGUAAACAAGUACUAAUAGUACCUCUUUUCGAGGU  
A  
>EMBL\_CDS:CAI21422 CAI21422.1 Homo sapiens (human) guanosine monophosphate reductase  
GCACUCCACGCAAGUUCUAGGUGGAGCCGAGCCGAGAACUCCGACGAGGCGAAUCCAGCCUCGU  
CCUGUAGGAACUUCAGCUCGAACUCCAGGCGUAGAUACGC  
>EMBL\_CDS:BAG37070 BAG37070.1 Homo sapiens (human) hypothetical protein  
UAGUAAUUUCAUCGGUCGUAGUAAUCGUCGAAAGGUAGAGACGACACUGACGUCCCGUAUAAACA  
GUGUAAAGAAGAGACGAAUAAAACACAAAUGUCGUUCUAAAGAGACGUCAGUACGGUACCCUCG  
ACCGUACGACUAGACAAUUACUA  
>EMBL\_CDS:BAG36757 BAG36757.1 Homo sapiens (human) hypothetical protein  
UCACCGUAACCCUUGGUGGUACCGACCUAACGAGAUCCGUACUUGUCGUGACACCAAUGAGACU  
CGGUGA  
>EMBL\_CDS:BAG37688 BAG37688.1 Homo sapiens (human) hypothetical protein  
GACCACCGCGAAGACGACCGCCAUGUACGUCGUCUCCGACUCCACUGGCUCGGCAACGUCUCCU  
UCUACCGUCGGUGGUCGUCCCGGUGGUC  
>EMBL\_CDS:BAG37378 BAG37378.1 Homo sapiens (human) hypothetical protein  
CAACCGAGUCUCUCGACCCCCUGUGUCCCGUAGAGCCCAAGAUGAAGGAGGUCCACAGACCGGUC  
G  
>EMBL\_CDS:BAG37793 BAG37793.1 Homo sapiens (human) hypothetical protein  
UGAGAAAGGUCGUUGAGAGAAACUUAUUGACAAAGGUAAUUAUCACGGUUUCCGACCUAACACCG  
UUAGGACUGUCUCUAAAGUCCAGUGACCUCUCUA  
>EMBL\_CDS:CAA16432 CAA16432.1 Homo sapiens (human) paired box 7  
CGACAUCGGCCACCACGACAUCCACCCACCCGUCAUCCGGACCCUCCACCCGUCCGACAGAGGAC  
CGAACUACCUCAGCCGGGCGACCGACGUCG  
>EMBL\_CDS:BAF98780 BAF98780.1 Homo sapiens (human) hypothetical protein  
ACGUAGGUGCCCACCUUCGACGGAGUCAAGUCCCAACGAUAAGUCGACCGAAUCUCUGUUAGACU

---

ACGACAACGUCCAAAGUGAACUACCUACGU  
>EMBL\_CDS:CAI23623 CAI23623.1 Homo sapiens (human) zinc finger protein 33B  
UUCGAAAAGAACACAUACCCAAGAGACUACAUGUAAUUCUGACUGAAUACCGUCUUUCGAAA  
>EMBL\_CDS:BAG37550 BAG37550.1 Homo sapiens (human) hypothetical protein  
GGUCCACUUUGACGAAGUCCAUUCACAACUAAUUAAGAGCUUGACUAAACUAUAGAAAACCAAGG  
UAACCAGAGUUUGGACUUCAGAAAACAUUGUAGACC  
>EMBL\_CDS:CAI42154 CAI42154.1 Homo sapiens (human) odz, odd Oz/ten-m homolog  
CAUACACAUCCACCUUACAAAGAAGACGGUAUUUAAGGGUCGUCUCUCAGGAACCGAUUUCUUUA  
UAACUUGAAGUCUAUA  
>EMBL\_CDS:BAG37064 BAG37064.1 Homo sapiens (human) hypothetical protein  
UCCAAA AUGGUCAAUUCAGGCCUUACUUGUACCAAUGUAAUUUUAGUGUGAAGUAAAACUGUC  
UUUCCCAUCUUGAA  
>EMBL\_CDS:BAG36994 BAG36994.1 Homo sapiens (human) hypothetical protein  
UCCCGACGGAGGGUCCAUCAGCAGGUCGACACACCAUAUAUACCGACGCGUCGAAACGAGUAGGA  
CCCUCUCAGGA  
>EMBL\_CDS:CAQ08480 CAQ08480.1 Homo sapiens (human) kinesin family member 4A (KIF4A)  
AUCCUUGGUCUGAACAUUGGACAACGAAAUCUACUAAUJUCAAGUUGAUAGACCGCUA  
GUCAUAAUUGUUGUCCAAACAAGGAC  
>EMBL\_CDS:CAO03520 CAO03520.2 Homo sapiens (human) novel transcript  
AAGAAGUCCAUGAAGACCUGCCGCAACAACGUGUCCACCUACCGCGACAGGUCGAACAGGUCCCU  
CUU  
>EMBL\_CDS:CAI42270 CAI42270.1 Homo sapiens (human) tubulin beta 4 (UUBB4) pseudogene  
CGGGCCUUGUGCCACCGGUACCAGUCCAUCGCCGGUACAGCGCCCAACGUGUACCGGUAGUACAA  
GAACCG  
>EMBL\_CDS:CAI42047 CAI42047.1 Homo sapiens (human) collagen, type IV, alpha 6  
GACCAGCGGGCCCCAGUGGUCGACAGGACGAUACUCACUCCCGUCCUCUACGGACCCCGUGGC  
CCCUCUGGUC  
>EMBL\_CDS:CAB42440 CAB42440.1 Homo sapiens (human) dJ597B2.1 (transcription factor 20  
CCGAAACGUCCCCGUCGAACCACCGUCGCAAUCAUAUGACGUAGUGUACGACUCUCCCAACA  
ACAACGACGCCAACGACGACGACGACGGGGACAACCCAG  
>EMBL\_CDS:CAI19007 CAI19007.2 Homo sapiens (human) novel protein  
CCGGACCCCUACCAUGUGUCCAUCUGUCAUCGAACCACUGGAGACUUUGACACGUGGUACCACG  
GAGGGUCCGG  
>EMBL\_CDS:CAI19407 CAI19407.1 Homo sapiens (human) v-myc myelocytomatosis viral oncogene

GGGUGGUCCCGAACGUUCAUAAGGUUCCGGAACGAAUCCUAGUGAUGAAACCCCGGAACCU CGU  
CGACCGGUCCACCC

>EMBL\_CDS:CAA22684 CAA22684.1 Homo sapiens (human) hypothetical  
protein  
ACACCUUGAACUCCUAAGACAACAAAAGCAUAACCACAUACUUAAGGUUUGUAAGAAGUUUACAA  
GAUUAU

>EMBL\_CDS:CAI21973 CAI21973.1 Homo sapiens (human) phospholipase C,  
beta 1  
GAACGAGAACAAAUCUCCACCUAUUUUCAUAAAGUAAUUCGGCUCCUAGAGCGACGAAUCCAAC  
UAUUUUAGGUAGUAGACUAGUUGCCAUUC

>EMBL\_CDS:CAB51755 CAB51755.1 Homo sapiens (human) novel C2H2 type  
Zinc Finger protein  
UCCAGACUAACCAUUGAUUUCCGAAAAGUGUAAGUAAACGUAAAUGUCCAAAAGAAACACUCUU  
UUCAGAAACCACAAAUUAAUUCAGA

>EMBL\_CDS:CAB36555 CAB36555.1 Homo sapiens (human) chromobox homolog  
7  
CCCAGGGCGACGGCUCACCCGUGCAGUCCUCUUCGUCUCGAAGAGGAACGGGAACCGGAACAC  
CCUCGAGG

>EMBL\_CDS:CAI21952 CAI21952.1 Homo sapiens (human) exonuclease  
pseudogene  
AACCCACCUCAAGACACCACGUAGAAGACUCCUACUAAGAAGAAUCUCCUAAAGAAGGCCUCG  
GGAAGAAGACCCUCACCCAACCCACCGAUAAUUAGAAACCUUCCCGUGAGGUCUAGAGGGGGUU

>EMBL\_CDS:CAI20281 CAI20281.1 Homo sapiens (human) ankyrin repeat and  
sterile alpha  
CCCCCUGGGCAGACCUACCGAGACCGGUCGCAUGUCUCGUCGACCUUCCAGGACGGGG

>EMBL\_CDS:CAI42978 CAI42978.1 Homo sapiens (human) lipin 3  
GAGGUACUGAACCUCGUCUCCUCCUCCGGGUACAGGGGUCUCGAGACUCAGAACGAAAGGAGACA  
GAGACCCACACCUC

>EMBL\_CDS:CAB90289 CAB90289.2 Homo sapiens (human) collagen, type IV,  
alpha 5 (Alport  
CGGAAAAGCGGACCUCGGGACCAACGGGUCCUACUGGAGGUGGUGGAUGUCCUGGUCCAAGAG  
GACCUUCCGGCCCCAAGGGUCCUCCCG

>EMBL\_CDS:CAI23620 CAI23620.1 Homo sapiens (human) poly(A) binding  
protein, cytoplasmic  
AUGUUUGUCGUCCUCAUAGACAUCAUCGUCAUCGCCGUUGACGUCCUACACGAGGAUAACAGACA  
C

>EMBL\_CDS:CAI43140 CAI43140.1 Homo sapiens (human) collagen, type IV,  
alpha 6  
UCCGGAACAACAGGGCCAUAUAGGUAGGAACGGAUUAGAGGUCCUUCGGGUGCCCCAGGUCCUUC  
AGGACCAUUGGGUAAAGGACCCUCCGGUCCACCUGGUCCUACCGGA

>EMBL\_CDS:CAI23618 CAI23618.1 Homo sapiens (human) pseudogene similar  
to part of  
CCACGCGUCGGGCGGUCCGACGGUUACCUCUACGGCUACUCGAAGACCUCGACGGACGUCCCGA  
CGUCGCGG

---

>EMBL\_CDS:CAB43181 CAB43181.1 Homo sapiens (human) FUL (ferritin, light polypeptide)  
CCAGUGGGUAGAAGAACUACUCGAAGUGAAGGAGUAGAUCUUCACUCAGAGGUCCUUCAGUGUC  
UCUACCCCCAGG

>EMBL\_CDS:CAB76865 CAB76865.1 Homo sapiens (human) ubiquitin-conjugating enzyme E2  
UCCAAGUUCAGAAGGAAGUAGUGAGUCAAAACGAAACACUGAAGUCCAUUCUGCGAACUUGGA

>EMBL\_CDS:CAA21453 CAA21453.1 Homo sapiens (human) gamma-aminobutyric acid (GABA) B  
GGUGUUUAAGGACCCUACAGUACAACUUUACGACGCCCAUAACCGUCCUAAGUCGUACUGUUAG  
AGUCAACACUACACC

>EMBL\_CDS:CAI42323 CAI42323.1 Homo sapiens (human) melanoma antigen, family E, 1,  
CCUUAUUUUUCACCUUUUCUCCUUCUCCUUUACCUCUCCGAAGGAGGAGGAGAGAAGACACCUU  
AGGACACGUCUAAGA

>EMBL\_CDS:CAI42433 CAI42433.1 Homo sapiens (human) dynein, axonemal, heavy chain 8  
UUUUUGUGGUCUAGUUCUCUACAAGGAGAUUACUAAAGUAACUUGACAGAGACCAUUUUGACCUC  
AAAAA

>EMBL\_CDS:CAI19790 CAI19790.1 Homo sapiens (human) exocyst complex component 2  
CUAAAAGAGGGGACUAAACACUGGAAGCAGGUACCAUAGGGAAGUAAACCUCUCUACGGCCAGUGU  
UCCCCCACAACAG

>EMBL\_CDS:CAI20309 CAI20309.2 Homo sapiens (human) meningioma (disrupted in balanced  
UCGCGUCGGUCCGUCGAGACCGGCUUGUCCAACAGGAACCUCGACCCGAACAACUCCUCGGGUC  
GCUCUCGCGCGGGUAAAUGACCGGCUCACGCGACCCGACCCGA

>EMBL\_CDS:CAQ07680 CAQ07680.1 Homo sapiens (human) pseudogene similar to part of novel  
CCACUACCGAGACCGACGGGUCUUCGACACCCACCCCGUCCCCGACCAGAACAGGACUCCGGGAC  
ACCGGGGUCCACCCGUCUCGGUCCGGUAACUCGG

>EMBL\_CDS:CAA22267 CAA22267.2 Homo sapiens (human) collagen, type IV, alpha 5 (Alport  
CCCAAGUGGUCCCAUUGGUCCUAGUGGUCCGUUUGGUCCUUAAGGACCAACCGGUAAAAGAGGUA  
GAAACGGACCAAUGGA

>EMBL\_CDS:CAI23555 CAI23555.1 Homo sapiens (human) cadherin, EGF LAG seven-pass G-type  
GGGUCCUCAUCUCCCGCCAGUCUAGGUCCUGAAGAACCUCGGCCAGACUCACGGGACCC

>EMBL\_CDS:CAM26476 CAM26476.1 Homo sapiens (human) fumarylacetoacetate hydrolase  
UCGCGAACGGUAGUGGUGCGGGUCGAGGUCGAGCACCAGUCCAACGCUCACAUGCGCCCGUAC  
UCCUACCCGCUCGGGA

>EMBL\_CDS:CAI95580 CAI95580.1 Homo sapiens (human) PUUAUIVE novel protein similar to

---

CCCUGUCGCAAGGUCCGUCCACGUCAACCGGGGACGUGUUUAGGCGGACGAUCACGUCGUAACC  
GGUCGCAGUCCUACCGUGGACAGCCCUUGAGAAAGGG  
>EMBL\_CDS:CAI42184 CAI42184.1 Homo sapiens (human) chromosome 20 open  
reading frame 94  
UAGUGAAGGUUCUCUUUGAGAGGGCACCACCAGCUUCAGAAGGCGUCUCGACGUCAAGGACGCAA  
AGACAACCCAAAACCGGUGAGCACCUGAAACAAAACCUGUACCACUA  
>EMBL\_CDS:CAI42909 CAI42909.1 Homo sapiens (human) UUP14, U3 small  
nucleolar  
AGAGAGAAGCUCGGAACCGGAGUAUCAUCCUGACGUCUCGGGCUCGGGAGACUUCGAGACGAGCA  
GCGUAGAAACGGAGAAGAUCGAGUACCGAGCCUCUCUCC  
>EMBL\_CDS:CAI42503 CAI42503.1 Homo sapiens (human) solute carrier  
family 13  
ACAGAGGACCCGGAAGAAGGUCCAGUCGUUCCCGAGACAGAGACACAACCCUCGAAACUUCAGUU  
UGGUGGUGAACUCUCUCCCGAAACCCUGCCCUUCUUCUUGUUCUACCACUGU  
>EMBL\_CDS:CAC03411 CAC03411.1 Homo sapiens (human) histone 1, H2bf  
CCCUGUCGUCGUCGCAUGCCGGCAGACCUAGAGGGACCUCACUACCACCUCGCGAACAACAUUA  
CGCGG  
>EMBL\_CDS:CAI20551 CAI20551.1 Homo sapiens (human) zinc finger  
CCCH-type containing 12A  
GCCGACGAAGGACACGAGGUUCACUCACCGAAGAAUGCGUCCUUCACAGGUCCGACCCGGGCA  
CGGCCGGGUCACCCAGUAGUCCCCGUUUUGAACAGUAAACUGCUUCCUCAUGUACUCGUCGGC  
>EMBL\_CDS:CAM21580 CAM21580.1 Homo sapiens (human) G protein-coupled  
receptor 112  
ACAGUCUACAGUCUUUACAACUAAAACUGUGGAGAUGACAUCUCCUUCAGUAUUGUACUCCCCGU  
AAUCUAU  
>EMBL\_CDS:CAB51071 CAB51071.1 Homo sapiens (human) hypothetical  
protein  
CUUACCUACCCGCAAGUCCGAGUCUCCGGGUACUUCUCCACCCGGAGAAGGAGCUUCCGGAAAC  
AAACAAA  
>EMBL\_CDS:CAB45738 CAB45738.1 Homo sapiens (human) hypothetical  
protein  
CGCGAACAGGACGUCGUGUCCGAGGAAGUAGUCGACGACCUAGACCGUCGACGACUUUCCCGU  
CAAAUGACUACUAGACGGCCUGUCACG  
>EMBL\_CDS:CAD92528 CAD92528.2 Homo sapiens (human) transcriptional  
regulating factor 1  
CUCCCGCCGCCGCCUACUUCUCUCCAAGGCCGGCCACGGCCUUGAAAAAGAAGAGGACGUGCCA  
GAA  
>EMBL\_CDS:CAI21445 CAI21445.1 Homo sapiens (human) chromosome 6 open  
reading frame 94  
AACAGACUCAAACGAGGUCUUCGUCCAGGUAUCGAUUAGGACUGAACCAACCCUGAAGUAAGC  
ACCGGUGGUCCUGGGACAAGACGUCGUUUCGAGGGUGUC  
>EMBL\_CDS:CAO72109 CAO72109.1 Homo sapiens (human) novel transcript  
CGUAGUGGACCCCUCCACCGGUUCCACCUUCUGGACCCGGCAAUCCAGGGCCUCCUAGAAGGGA  
UCGGGUGCUACCCGAGGACUACAGAGCCCACCACG



---

>EMBL\_CDS:CAB42442 CAB42442.1 Homo sapiens (human) hypothetical protein  
UUCGAAACGAAGUCCUAGACGUACUCGACGUACCUCUAAAAGUAUUUAGAGAGACAACCACAGUC  
UCCGGAACUUAUCUUGUUCAAA

>EMBL\_CDS:CAI43080 CAI43080.1 Homo sapiens (human) androgen receptor  
CGACGACGACGACGACGGACCCCGAUCAGAGAACGACGACGACGACGACGACGACGACGACGACG  
ACGACGACGACGACGACGACGACGACGACGACGACGACGACGACGACGACGACGACGACGACGACG  
ACGCGAGCG

>EMBL\_CDS:CAB46715 CAB46715.1 Homo sapiens (human) small nuclear  
ribonucleoprotein  
CCGGGUCGUUCAGGACGUCCUCGGACCCCGUACCCUUGGGGUCGACCCUAAGGAGACGGUCGUCG  
GGACGGCUAGGGACCCGG

>EMBL\_CDS:CAB43225 CAB43225.2 Homo sapiens (human) hypothetical  
protein  
CAUAGUAAGAGACUUGAACAAAGUGACUUUGAAAAGGUGGCAAGAAAACGAGAACUCUCCUUCUA  
AAGUAUUUCAAGUCCUCACUAUA

>EMBL\_CDS:CAI42283 CAI42283.1 Homo sapiens (human) spectrin repeat  
containing, nuclear  
CACCAGGGGCCUCCAUAAAAACUAACGUAAAAGACACUAAAAUGUAUCCGGAGUCCCGAAAGCC  
CCUAGUA

>EMBL\_CDS:CAI23231 CAI23231.1 Homo sapiens (human) actin, gamma  
pseudogene 9  
CGAUCGUACUCCAUAUACGUAAAACGGUCCCCGUUUAAAUAUGAAGACUUAUUGGGUACGUCGUU  
UACGAUACGUAGACGAGCG

>EMBL\_CDS:CAI19089 CAI19089.1 Homo sapiens (human) novel protein  
CGGAGUCCGACCGACCACUACCUUCUCGACCACAGGUCUCUGGGACGUUAGGUCAGUAUCGGGUC  
CAUACCGGACUCCG

>EMBL\_CDS:CAM28081 CAM28081.1 Homo sapiens (human) collagen type XII  
alpha 1  
CACUGAGGACCCUCGGACCCGAAGGGCCGCCGGGACCACCCGGGGACCCAGGGUAACGUGGCAG  
AAAAGGUCACUUCGGAGACAGAGGACCUCAGGGUAACCAGGACCACCCGGUCCAUAUAGGACCC  
AAGGACAAGCCGGACCUUCAGGACCGAGAGGUCGUAGUG

>EMBL\_CDS:CAI19192 CAI19192.1 Homo sapiens (human) REV3-like,  
catalytic subunit of DNA  
UCACUGUCAGAUUUUUGGUAGACACCCACAAAUA AAAAGUUUUCGAGGUGCUCACCAAAUCAA  
UUUAGUGA

>EMBL\_CDS:CAI21950 CAI21950.1 Homo sapiens (human) zinc finger  
protein 697  
CCUCCCCGAAGAGCGGCCACACGUGCGGUCCACCAAGUGGUCCACGCUCAAUGCGGGCUUCGGG  
AAGG

>EMBL\_CDS:CAB46377 CAB46377.1 Homo sapiens (human) hypothetical  
protein  
UCCGUCUACGUGCCUGUUAGAGACGGGUACGGAAGAGUCUGUCGGUAACCCUCGACCUAACCC  
AUCCCCAAUAGGUCACGCUACGGA

---

>EMBL\_CDS:CAQ07672 CAQ07672.1 Homo sapiens (human) chromosome 11 open reading frame 41  
CGUCUCAGUAAACGUCACCGUCUCCGAUCGAAAGACGACCAGUAAAGAUACCGGGGACUAAGACG

>EMBL\_CDS:CAI95767 CAI95767.2 Homo sapiens (human) collagen type IX alpha 3  
GACGAGCGGAAACAUCGGUCACCCAGGGAACUUGGGACCGUAAGGUCCCCGGGACCCCCUGGAC  
CGCCCCGUC

>EMBL\_CDS:CAI95769 CAI95769.2 Homo sapiens (human) death inducer-obliterator 1  
CCCCGGAGACGACAGGGGUUAUCCUCCACCGGGUACAACGGGGCUCUUAUCCUACCCG  
GGAAGACCCGAGGCUUAGACCGACCGCCUCCGGGA

>EMBL\_CDS:CAB53713 CAB53713.1 Homo sapiens (human) hypothetical protein  
AGGUUGGGACUAAGUCCCCUCCGGUACCGAAAUGCUACCGUCGGUACAGUGACACCUACCUGUU  
CACCUUCAGCAGAUCCGCGAGACACAGUCCCUACCU

>EMBL\_CDS:CAI22564 CAI22564.1 Homo sapiens (human) chromosome 1 open reading frame 134  
CGGGUAAAAACAACAACAACAACAACAACAACUCUAUCUCAGAGUGAGACAACGGGUCCGAC  
CUUCGUUCUGGGACAGAGAUUUUUUAUUCUCCCCGUAGUCGUUCUCCCCG

>EMBL\_CDS:CAI21775 CAI21775.1 Homo sapiens (human) replication protein A2, 32kDa  
CACCACUUGAGUAAGUAUAGGAGUCCCCGUACUAGAAUUCCGAUGGUCCGAGAAAAACAAGAC  
UUUUCUAGAGUCCACCGGACGGUGAAAGUGUAUACAAAGACCUCCUUGGUGUCACAAAAGUGACG

>EMBL\_CDS:CAI19682 CAI19682.1 Homo sapiens (human) ribosomal protein S4, X-linked  
GGAACCGAACACCGUACCAAACACGGUACCAAACAACGGGAACGGUUAUUGUUUUUACAACCU  
UUCGGUCCACCGUACGACAACGGCAACCGCAGAAAGUGCACUUGGUACCGUUUUUAUAGGUCCC

>EMBL\_CDS:CAI22711 CAI22711.1 Homo sapiens (human) potassium voltage-gated channel,  
UUCUAGAAGGGACGUUAGCAGAAUCCGUGGUACAGAGGCAUAGGGUCACACCAGUACCACUGUUA  
CCACAUGGUUUUGCUCCGUCCCUACGAA

>EMBL\_CDS:CAI42134 CAI42134.1 Homo sapiens (human) forkhead box H1 (FOXH1) pseudogene  
CUCCACAGGACGUCAUCUCACCUCUCUGGUCCGGGAUCCGAGACACCUCUCCCAGCUCGGGUC  
ACCGAGGGACGACCCUUCGGAG

>EMBL\_CDS:CAB81612 CAB81612.1 Homo sapiens (human) EPH receptor A8  
CCCCCACUACGUCUCCGUCCUUCUGUCCACCCCCACGGACAGGUAAGACUAUCACGUAGAAGAG  
GAG

>EMBL\_CDS:CAB43361 CAB43361.1 Homo sapiens (human) hypothetical protein  
GGAGAGGGGGUUAUAGGUACAGGGGGGCCUCCGGAGAAGACGUGGGGGUGAGUCGCCCCUCGGUGUC  
CUCCGACUCGCCGCCACUGGAGCUCUCCGGAUCCCCUCCUCCGACCACCCCUCUCC

>EMBL\_CDS:CAQ10064 CAQ10064.1 Homo sapiens (human) cyclic AMP phosphoprotein (ARPP-19)

UUCCUUCGACCCGGGGGUCCGAAACAGGAUCCGAACCUAUAACCCGAAAUCGAAAAGGAA  
>EMBL\_CDS:CAC00585 CAC00585.2 Homo sapiens (human)  
UUCUCUCGGGGCAGGAGUCCUAGUAACGACAUCAGUAGGUGGUUCUACUAAAGAAAAUACUCUAC  
CCCCCCGAAAAGAA  
>EMBL\_CDS:CAQ76415 CAQ76415.1 Homo sapiens (human) olfactory receptor,  
family 2,  
GAUUACCAGAAAAGACCAGGGGCCUCCAACUGGUCGUAGACACCCUGUCACGACCACCAUAUCGU  
CUCCAGGUCUUUCCUAUCUAAUC  
>EMBL\_CDS:CAI20272 CAI20272.1 Homo sapiens (human) arginase, type II  
(ARG2) pseudogene  
AGAGGAUCUAGUCUUAUGCGAUUAUGAACCCCUCCUCUAUGUUCCAAACAGGUCCCUUJAGGACCU  
UCAAGACCAUGGAAAGGGACAUCAAGACACUCCUCU  
>EMBL\_CDS:CAB81608 CAB81608.2 Homo sapiens (human) rearranged L-myc  
fusion  
UCUACUAAGGUUUAGACAAAGUCUUGAUGUAAGUAGGAAAAUCCUACUGUCACACCAAAGAGUC  
UCAAUUGAUGACCCUAGUGGA  
>EMBL\_CDS:CAI43017 CAI43017.1 Homo sapiens (human) transient receptor  
potential cation  
CCCCGACCCCUACUACAACUUUCCUCCACCGUCCACGGUGGAAGUAGUUUCAUUGAGUAGGUCU  
CGAAG  
>EMBL\_CDS:CAB43293 CAB43293.1 Homo sapiens (human) hypothetical  
protein  
CGCCGACGGCUGAGUCGGUCCUUGAGAAAGAGUCCCCACCGGAGGACCCUGUCUCCUGAGUCUGGG  
ACUGAGCCGUCGACG  
>EMBL\_CDS:CAB92770 CAB92770.1 Homo sapiens (human) glutathione  
S-transferase A2  
UUGAAGAAGUGACACCCGUCCAAUGACUAAGACCAAAGUCCCGGAAGUCGUCUCCCUUCGACCU  
UUAUUCGUAUCUAGUUCGAGAAGGUGCAUCAUCUCUCAA  
>EMBL\_CDS:CAB45747 CAB45747.2 Homo sapiens (human) hypothetical  
protein  
AACGAAGUUCUCCACCUCCUCCGAACACACCCUUGGGGUGGUUCACAGACAUUUUAUACCUUCGUC  
>EMBL\_CDS:CAB65797 CAB65797.1 Homo sapiens (human) olfactory receptor,  
family 5,  
CUUUCUUCUACCACUUAUCAUUUUUGACGUUAAGUAAAUCCAACCUCUAGGGUUCUACUACUUA  
AGUCAAUUCGACAAACUAAGAAAAGAAAG  
>EMBL\_CDS:CAI22044 CAI22044.1 Homo sapiens (human) dystonin  
UGAUAGUCACAGACAAGGACACAAUAAGACGACUAGUAAGUCGUCACUGCAAAGUAUCAGUGAUC  
GUGACUACCA  
>EMBL\_CDS:CAI23037 CAI23037.1 Homo sapiens (human) E1A binding  
protein p300  
CCGGACGACGGAAUGGGACCCUGUGUCCCGGUCGUCGAACUCAGGACCCGUUCAUCCACCGUAC  
GA  
>EMBL\_CDS:CAO03467 CAO03467.1 Homo sapiens (human) myo-inositol  
oxygenase

CUGGACUGCACAUCAAGGCCUUCGACCGGAACAGAAACCGGUGGAGACCCAGGUGUAGUCCAG  
>EMBL\_CDS:CAI43095 CAI43095.1 Homo sapiens (human) zinc finger  
protein 64 homolog  
ACCGACCUCAACGCCGACCGCAUCCCCGUCUAGACCGUAAACUCCCCGGCGAGCAGGCUCACCUA  
GGAGUCCACGAACAACUCCGACGACGACAGCCGUCGCCGCAUCAGU  
>EMBL\_CDS:CAI22113 CAI22113.1 Homo sapiens (human) sex comb on midleg  
homolog 1  
UCGACAGAACCUACCCCGUCUCUACCCUACCCUUAAUCCCGAACCACAGGCCGGGGCGAAGA  
AAGGACCAAUGCGGGGAGACGGGACCAACUACAAGGUUCUGUCA  
>EMBL\_CDS:CAI43016 CAI43016.2 Homo sapiens (human) chromosome X open  
reading frame 45  
CUACUUAAGGACCCGUAGGGUAUAGGGGUCUGAACAGAGCCUCUACCUACGACUCCUACUUUAC  
AAGUAA  
>EMBL\_CDS:CAI19918 CAI19918.1 Homo sapiens (human) KH domain  
containing, RNA binding,  
CCACCACCCCUCCUCCUACCGUGGGGGUGCCGGGGAACUCCUCGACACCCUCGAUAAGACUA  
GGGAGACGGAGA  
>EMBL\_CDS:CAC33877 CAC33877.1 Homo sapiens (human) zinc finger,  
NFX1-type containing 1  
CAACUUCAAGAACCGGUCUAGUAUGUGCAACCGUGACCCCGCGUCGACGACCACCAGGGGUUAGU  
UUUACUCCACGACCGUUCGAAACGAGUUACACCGUUACCAUACCCGGAGUCCUGAAGGCG  
>EMBL\_CDS:CAB88112 CAB88112.1 Homo sapiens (human) chromosome 6 open  
reading frame 72  
UCUAUGACCGAUCACCAAACGUCACUUGAUUGUGAAAGAAAAAACCCUCUCCAAUCCUCCAUUU  
AUUUUACAGUGACAGA  
>EMBL\_CDS:CAB59178 CAB59178.1 Homo sapiens (human) hypothetical  
protein  
CUAGGGACCCGAGGACUCUCGGUGACCCGACCCCAACCUGUACUCGUACAGGGAAGAAUUGGGCC  
GGGAAGAAUGAGUCGAACCGGACCCAG  
>EMBL\_CDS:CAI19914 CAI19914.2 Homo sapiens (human) soluble adenylyl  
cyclase (SAC)  
GAAGAACAUCGGAUUGAAACAGAAGAAGAGAAACCAAGGUAGUUACUACAGCUAUCUCCUCCGU  
AAUUAUACCCGAGUCGUCCUUC  
>EMBL\_CDS:CAB55978 CAB55978.1 Homo sapiens (human) hypothetical  
protein  
UGC UUAUUUAGAAAUGAAGAUCCACCCAACGUGAAAAGAUCAUCAUCUAAAUAGGUAGCA  
>EMBL\_CDS:CAI40128 CAI40128.1 Homo sapiens (human) actin filament  
associated protein  
ACAUUCACAACCCGAGACUCUUGAAAGAGACGUAGUCAUUCUCUCUAAAACCGGCGUGAGUGU  
>EMBL\_CDS:CAB55985 CAB55985.3 Homo sapiens (human) hypothetical  
protein  
GACCGUGACCAUCGUCCCCAUCCCCUCCGUGGUGUCCUGAGAAGGGGUCGUCGACGGAGACGAAA  
GAGGCCCGGUC  
>EMBL\_CDS:CAB96723 CAB96723.2 Homo sapiens (human) CD83 molecule

---

AGUCCCUUAUCCCGGAAAGUAACCCCCGAGCUUUCUUGGUAAAACGGGGAAGACUACUAUCACG  
ACAGGGGACU

>EMBL\_CDS:CAI22736 CAI22736.1 Homo sapiens (human) sperm associated  
antigen 17

UCUUUAGAGACCAAACCUUCUGAUCCGUGUGAACUCCUAAAGACAAGACUUUGGAAUACACCGA  
ACUUUAGAUCUAAUUCUAGUCUACAUAGA

>EMBL\_CDS:CAB55920 CAB55920.1 Homo sapiens (human) hypothetical  
protein

GGGUCCCCACCGUACGGGUGGACCUUCCGGACGUGCAUGUCGUCCUACGACUCCCGACCCCGGA  
AGAGACCGAGUCGGUAGAAAACCC

>EMBL\_CDS:CAH10712 CAH10712.1 Homo sapiens (human) hypothetical  
protein

GAACCGGUUCUAUAUGAGGGAACGUCACCGGUCCGACGAGGAAACGACUCGGUAUCUGGUGACGA  
ACAUCCAUAACCGGUCC

>EMBL\_CDS:CAI19330 CAI19330.1 Homo sapiens (human) chromosome 20 open  
reading frame 32

UACCCCCCGUGCCGGACAGACGUCGCGUGGAGGCACUCCUAAACCUCCGCCAACCGUCCCCGGUCC  
GGAACGGAGGGUA

>EMBL\_CDS:CAB57341 CAB57341.1 Homo sapiens (human) hypothetical  
protein

CCCGCGACUCCUGUCUACCCGACUGUAUCUUCGGUACCAAUCCUAGACCGCACAUAGAGCCAGGUG  
AAGUCGUCGCGGG

>EMBL\_CDS:CAI21960 CAI21960.1 Homo sapiens (human) fatty acid amide  
hydrolase

CACAUCGACUGCCGGGGACACCCGGGACGGACCCCGUAAGUUCAGGUCUCGUCCCCGGUCGUACCC  
CCAGUCGUGGUG

>EMBL\_CDS:CAB56033 CAB56033.1 Homo sapiens (human) hypothetical  
protein

GGUCCAUAACCCCGACAACCCGGACCAAGUCCCCUGGGAUGAGGGGCCGGGAAUCGGGUAGACC

>EMBL\_CDS:CAH72269 CAH72269.1 Homo sapiens (human) chromosome 20 open  
reading frame 59

CUACCCGUACGACCUCGCCCCGCGUCAUGUCUUCCGUACACGGGUCGUCGUCGCAGGGGCAG

>EMBL\_CDS:CAB81623 CAB81623.1 Homo sapiens (human) novel protein

AACCGAAAAAGUGAGUCGUUUGAGCACUCUGACCCCUCCAGGUCCCGCGGACCUAACGAAUCACG  
GAGAAGAAAGAGAUCCCGACUCGACACUUUUCGACC

>EMBL\_CDS:CAM28319 CAM28319.1 Homo sapiens (human) bone morphogenetic  
protein 7

CUCCCAUGCCGACAGCUCGUCCUUCUCUAGGCUAAGGGACGGUACAGGAGAGGAGACGACCUUGC  
ACUCGAAGGUCUCCCGUCCUGAGCACAGACCAAGCAAGACCAGCUACGGGAG

>EMBL\_CDS:CAI12515 CAI12515.1 Homo sapiens (human) golgi-specific  
brefeldin A resistance

AGUCAUCCAGAAGGAACCUUCACCAAACCCUCCUCUUAAGGUCCGGUGACAGACAUCUCCUGA  
CUGGUGACGACU

>EMBL\_CDS:CAI22343 CAI22343.1 Homo sapiens (human) chromosome 1 open

reading frame 164

ACACGUCCCCUACUGUAGUCGGAGACACAUAAACACCGAAGGGUAUGAGGUCUCACAGUAGGGGUA  
GGUGU

>EMBL\_CDS:CAC44024 CAC44024.1 Homo sapiens (human) SLC2A4 regulator  
CCGUCACCCCCACUGCCCCACCUGCCUCUCCUGACCAGUGACCGGUCCAGGGUAGGGGUCAGAGG  
UGACAACGACGACGACGA

>EMBL\_CDS:CAB55896 CAB55896.1 Homo sapiens (human) hypothetical  
protein

CCGUGGGAACCUCCUCAGACGUCCUCACUCCCCGGAGACGACGAGAGACUCCGACAGUCGCGAAC  
GUCCCUCCUCACCUCGAGAGUGUUUACCCAGACCGAGAAGGUCACGG

>EMBL\_CDS:CAI15269 CAI15269.1 Homo sapiens (human) immunoglobulin  
superfamily, member 8

CCGGCCCUUGCCCGUGACCGACGAAGUGCUUCGGCCCAGGGUCUGGGAGCUUGUAUCCGAAACCG  
CUCCGUCGCCAUCCACGGGCGUAGUGGUCGG

>EMBL\_CDS:CAI14947 CAI14947.1 Homo sapiens (human) zinc finger  
protein 37A

UCCAGAAGGGUGUAAGUACUGUAAGUAUCCCAAAGGGGGACACACACAAGAGACUACAGAACAC  
ACCCGACUGAA

>EMBL\_CDS:CAQ09650 CAQ09650.1 Homo sapiens (human) poly(A)-binding  
protein pseudogene

CACCAUUAUUGGACUUCUCCACAGGACAUCUUUAACGUCCACCUGUGUGGAGAGUGAAGA  
CAAUAAAAGACG

>EMBL\_CDS:CAQ10609 CAQ10609.1 Homo sapiens (human) par-6 partitioning  
defective 6

UCAAAACCAAGUUAGACGACACCAAUCCGUUCUCCGAUAAUAGUCGUCUAACCGACCUCGA

>EMBL\_CDS:CAI17853 CAI17853.1 Homo sapiens (human) hemicentin 1  
CUUCAUAACUCGUAUGUAUCCAUCCAUAAGGAACGUGACCAGACGACUGACAAAAAACUUCAG  
GUCCCACCCGAAAGCUCUUUUCGGUCGAGCCUUUAGUUAUCAUGACUCCGGUCAUUACGCUUGUC  
UCACGGAAGGUGACGAACUCCAGAAG

>EMBL\_CDS:CAB99331 CAB99331.2 Homo sapiens (human) collagen type XIX  
alpha 1

CCCCUUGGCACUUGUGGACCUUCAGGAGAAAGUGGGAAACCGGGUGCACCUGGUCCACGAGGUCC  
UAAAGGUAGAUUAGGACCAAGGGG

>EMBL\_CDS:CAM13070 CAM13070.1 Homo sapiens (human) shroom family  
member 4

CGGAGUAACUCACCCAACCUUAGGUGCGACCUUCGAGACAGUGUCCGAAAACCCUAGGUUGUCG  
AAACCAACUCCG

>EMBL\_CDS:CAI16056 CAI16056.1 Homo sapiens (human) chromosome 9 open  
reading frame

AAGUAAAUUUCAUCGUGUAAUCCGUUACGAAGUUAUCAUCCGAAGUUUCACGAUGAAAAAUUCC  
UU

>EMBL\_CDS:CAI23423 CAI23423.1 Homo sapiens (human) leucine rich  
repeat containing 7

GACUCUACUAAAGAAGAAGUGGAGCCUUUGUAGCCGUACCGUGGUCUGCCGGCUACUAAAAGGCA

AACCACCAGUAGAGGUC  
>EMBL\_CDS:CAH61508 CAH61508.1 Homo sapiens (human) ribosomal protein L12 pseudogene 3  
CACGAAUACACGAAGACGAAAAGAGACAGACUCACCAGGAAACUGUCGAAACUACCAGUUCGGU  
CUCCGUCUCCAUG  
>EMBL\_CDS:CAI22170 CAI22170.1 Homo sapiens (human) chloride channel, calcium  
GACACUUGACGAACCACAUACCAAGUAGAGAUGGACCCUCACAUCCACCACGUUGAUUUGUAGU  
CGUACAAAUACC  
>EMBL\_CDS:CAC35071 CAC35071.1 Homo sapiens (human) novel protein similar to serine  
UAGUCGGGAUAGCAAUAGUUUAGGACUCUUCACCUAGUAAGGUGGUCCGUAAAAGAACUAGCAAC  
CCGACUA  
>EMBL\_CDS:CAB55911 CAB55911.1 Homo sapiens (human) hypothetical protein  
AAGGCCAAAGUGAACUCCCUCCGAAAAACAGCUGCAAGAGAGAGAAAAAGAGCUAGGGCAGAAA  
GAACUCUAGCUCUAGCCCCUCUACAGCCGCAGAUAGGGACCUGGCUCUAGCUCUU  
>EMBL\_CDS:CAQ07060 CAQ07060.1 Homo sapiens (human) staufen RNA binding protein homolog  
GCCGGAACUGAUAAACAAAUCCCGCAAAAAUUUUUAUUAACGAAAAGGUGGUGUCCUUCU  
CCACCUUCAAAAAUUCGAGGACAUUCUGCCACCAACGUCGUGC  
>EMBL\_CDS:CAH70743 CAH70743.2 Homo sapiens (human) centlein, centrosomal protein  
GCCUCUUGGGAACAACCGUCUAUACAAAAGACUGUCAAAAAGUAAACGAUAGAAAUCAAGAG  
GAC  
>EMBL\_CDS:CAC40711 CAC40711.1 Homo sapiens (human) 1060P11.4.4 (killer cell  
AGUGAGCCCAGACUGGUGAGCAUCCCUUAGGUACCUUUCUGGCUUCGUAGACAUCCAGAGAGG  
CACCCACCGUCCUGGGUCUCCU  
>EMBL\_CDS:CAI19614 CAI19614.1 Homo sapiens (human) ADP-ribosylation factor guanine  
CCCACCUUAGGUCCGCGAGGAGACCACGUCCUUAACCCGAUACAGAAGUUGACUGCAAGGGUCG  
UACGGGACGAGGACCUCUUUGACCUAGGGGG  
>EMBL\_CDS:CAH71770 CAH71770.1 Homo sapiens (human) transcription factor 7-like 2  
CCUCCUCGACAAAACUAAGCAAAGACUAAGUAACUGAUCUCUGCUAAACUGUAGUCGAUUUAGG  
>EMBL\_CDS:CAI14921 CAI14921.1 Homo sapiens (human) zinc finger, CCHC domain containing 6  
CGACAACAUUAUCCAUUCUACAAAGAGUCUGGACUUACAAAAGACUCCUGAGAACGAUUAAGAAG  
UUAUCA  
>EMBL\_CDS:CAI19272 CAI19272.1 Homo sapiens (human) ubiquitin protein ligase E3 component  
GGAACAACCAGGACGACGUCCGAGUCCCGUUACCGAUCAAGUUGGUACCAGAGCAGUAGACGUAG  
UCCACCCUACAGGUCGUACCCCCCUUCGGGAGACGCGGACGGUCGUCCCGGAGGUCC

---

>EMBL\_CDS:CAI16208 CAI16208.1 Homo sapiens (human) nucleolar protein 8  
CCAACACCGUCAUAAAACUCCCAGUAUAAACUACUAAAAUGCAAUACAACUAAAAAUUCCACU  
UCUUGUCCAUCUGAGAAGGUUUAACGAGUGUUGG

>EMBL\_CDS:CAI12398 CAI12398.1 Homo sapiens (human) collagen type XVII  
alpha 1  
CAGUCGUAACAUCGUCGAACGAAAAGAAAAAUCCACAGAAGACUUUUUCUUAACGUCGCU  
ACGACCG

>EMBL\_CDS:CAI20000 CAI20000.2 Homo sapiens (human) chromosome 6 open  
reading frame 170  
ACAGAAACCGUCAAAAGAUAGGUAAAGUCAAAACAAUAGUCUAUAAAACUCCGUUUUUUCGAA  
CAGUUCUAGUAACAGAACAAAAUUGGUCGUAAGAACAUAACAGACUGUCUAUCGUCAAACCGU  
UACCUAUACUACUUUUGUAACCGGUUCCUAU

>EMBL\_CDS:CAB70833 CAB70833.1 Homo sapiens (human) hypothetical  
protein  
CCGAACACCCGAGGGCUCGGAGGACACCCUGGUGACCCUGAAAGGUAAGACCCUCCGGGGUCAC  
ACUAGGGACAGUUAUCCGAACCCUGGUAACCCGG

>EMBL\_CDS:CAM17621 CAM17621.1 Homo sapiens (human) potassium channel  
regulator  
AUGGUCGGACUGAGGUCAAACCAAUAGUCAUCACGACAGUCUUGGUGUGACCUUUUGGUCCAGUA  
CCAU

>EMBL\_CDS:CAB70855 CAB70855.1 Homo sapiens (human) hypothetical  
protein  
GGUUAUAGUAACAGGUUAUAGUAGACCCUACCUUCCAGUUGUUUGUAUAGUAGUAACAACCCCGA  
UUUGGGUAGAAGUAACCCCAUCAACCGACCUCGGUGGACCUACCAACUACUACAACC

>EMBL\_CDS:CAB63722 CAB63722.1 Homo sapiens (human) hypothetical  
protein  
ACCCGGGUUCCUGUCACGAAUGUCACCGCUCCCCAGUCCUACAGUGAACGAGAAGCGGGACGGAG  
ACCGACUAGGACCCUGGGC

>EMBL\_CDS:CAI39480 CAI39480.1 Homo sapiens (human) LIM domain 7  
AACACUAGCGGAAAAAUCAAAAAGUUUCUUUACCUAAGUCUACGAAAACUAAGUUUUCGUAACG  
AAAGUAGUACUUAAGGUAAACUAAAGAAACCUAAGUUUAUAUCUUGAGACUUCGAAAGCCUC

>EMBL\_CDS:CAH73836 CAH73836.1 Homo sapiens (human) chromosome 10 open  
reading frame 4  
UCUCAAGAUAUCAUCUCUUAGAAGUCUAAAGAAACUUCUACUACAGGAAUAGAAAAAGAACC  
UCCGGAGAAGACGUCUUCUAUUAGACCUAAAAAAUACACUACUGAGA

>EMBL\_CDS:CAH71682 CAH71682.2 Homo sapiens (human) chromosome 13 open  
reading frame 18  
GAGACAGGUCGAGGAACCGAAAGCGUAUGUCCGAAACCGGCUACGAGUCGUUUAAACUUUACCCG  
ACCACGGUAUACGACAGCUCGUCGACAAACCUC

>EMBL\_CDS:CAH73304 CAH73304.1 Homo sapiens (human) dachshund homolog  
1 (Drosophila)  
GGAGGAGGUCUCUCCCCGUCACUCCCCGAUAGUCCUUGUGCGAGGAAUUAUUGACUACAGAGU  
UGAGACCUACCCCC



---

>EMBL\_CDS:CAI23362 CAI23362.1 Homo sapiens (human) zinc finger protein 644  
GAGAUGUUCGUAUACCGGAACCCUGUAAUUCUACCGCUUUCACUGAUAAGGGUAGAUUUACUAUG  
UAGUAUACGGACACCUC

>EMBL\_CDS:CAI20328 CAI20328.1 Homo sapiens (human) novel protein containing CH (Calponin  
ACGACUUAGGUUACUCCAUUUAAAGCUUUUUUAGGAAAAACCGUAAAAGACUAACUAACUCGU

>EMBL\_CDS:CAI12722 CAI12722.1 Homo sapiens (human) ash1 (absent, small, or  
ACGCUUCCUCUUAACCGUUGUUUCAUCCUCCUCUAUUGGCGGAGGAGGGGAAACUCCGGAAGAA  
GUAACGU

>EMBL\_CDS:CAB66599 CAB66599.1 Homo sapiens (human) hypothetical protein  
UCCUGUCGAAAAGAGGUAGAUUAAAACAAAACGGUAUGUUAAAUCCCCUCGACCAUACAGAA

>EMBL\_CDS:CAH70098 CAH70098.1 Homo sapiens (human) haloacid dehalogenase-like  
AUACGGACGGACUUCGGAACAAGGUCCCGACUCCCGAGGUGGAGGUCGGGUACCCGGGCCCGGAA  
CCACCGUAU

>EMBL\_CDS:CAQ10575 CAQ10575.1 Homo sapiens (human) capicua homolog (Drosophila) (CIC)  
GGGACUCCCCGGGUCCCGAGGAGGUACCACCCUCCACUCGAAAUGGUCCAAGGUGGUGGGG  
GUUUCACACACCCCAACGCCCGGGACCCGAAAGUCCC

>EMBL\_CDS:CAI23173 CAI23173.1 Homo sapiens (human) centaurin, beta 5  
CGAGCCGACGGUCGAAGAAGUACAUCCCCAGGUCCGACCACGUCCUCCGACAUCGGGACGACCUUC  
UUCGACCUGACCCG

>EMBL\_CDS:CAB63754 CAB63754.1 Homo sapiens (human) hypothetical protein  
CCCCUCUUUAGUCACAGGUCAGACCGAGUCCCGAACACCUGACCUAUCGCUUUCGAGGGG

>EMBL\_CDS:CAI95132 CAI95132.1 Homo sapiens (human) transforming, acidic coiled-coil  
CCCCAAUGGAGGGGACGGAGGCCCGGCACCAUUCUCCGUCGAAAAGGAGGGCUGUCCCCACU  
CAAGACGUGAGACGGUGGAGGUCUUCGGCCCCCUGUUGGGG

>EMBL\_CDS:CAD13328 CAD13328.1 Homo sapiens (human) tyrosinase-related protein 1  
ACUUCCACACGUCCUCCUGUUUUUAUCCUAGUAAACCUCUGUUUACCCAAACAGGGGGACAAGGU  
AAGU

>EMBL\_CDS:CAI12716 CAI12716.2 Homo sapiens (human) ash1 (absent, small, or  
AUCAUGAAUCCGAAAGUCGUUGAACCGUCACAAACAGACUACGUCUAUGACGUGGGUCAAAAUUU  
UUUCCGAAUAAUGAU

>EMBL\_CDS:CAB66750 CAB66750.1 Homo sapiens (human) hypothetical protein  
GGUCCCGAGGAUCCUUCUAGACGGAGUCCACCUCGCCGGAACUCACACCUCCGAAGGCCCCUGA

CC

>EMBL\_CDS:CAI14765 CAI14765.1 Homo sapiens (human) MAP kinase interacting

GACAUCAGGGUCGAUGAACCCUCCGACUCCACCCUCCUAGUGACCUCGGGUCCCUCCAACCCCGA  
CGUC

>EMBL\_CDS:CAH73308 CAH73308.1 Homo sapiens (human) novel transcript  
CCGGACCACAAUUAGAAGAACCUGCUUAGUUUACUCGGAAUACAAACAGUAAUACGAAUAAUUUU  
UACACAGCCUCCUCUAAGCUGGCCCAA

>EMBL\_CDS:CAI41479 CAI41479.1 Homo sapiens (human) ubiquitously transcribed

CCGUUCCUCCCAUACCACUUCUACCACCAGAACCUCACCUGUAAAUAGGUUGUUUACGAUGA  
CAAUCUAUUCGGUAAAAAUGGAUCUAAGGACGUACGG

>EMBL\_CDS:CAI15524 CAI15524.1 Homo sapiens (human) Smg-5 homolog, nonsense mediated mRNA

GGACGUCGGGAUCCACCCCGGACGAGGGACGGGACCUUCGAUCUGUCUCCUCUGUGUUUCGUCU  
UCACCCCGUUACCCUACACGUCGGGGACGAAAACCCGACAUC

>EMBL\_CDS:CAH71353 CAH71353.1 Homo sapiens (human) calcium channel, voltage-dependent,

GGUGUAGUAUGCCUCCUCACACGAGACAGAAGAAUUUCUCCCGUAAGAAAAGAGAAACCUCACC

>EMBL\_CDS:CAB70793 CAB70793.1 Homo sapiens (human) hypothetical protein

AAGAAAGGACGGGAGCCACCGUGCGACGUAGGCCGGCUACCAAACCAAGUCCUACCCACCCGUG  
GGUCCUCUCUU

>EMBL\_CDS:CAB70826 CAB70826.1 Homo sapiens (human) hypothetical protein

CCAGAACCGUACCUCUCUUCUCGACGACGUCCCGGAGAGCCCCUCCCCAACCGGUUCAUCCGU  
AAGUGGUCGACGUACUAGAGAAGGUGGACCCCGAGACGUCCUCCUCGACCGAGAGAGGGUGGGA  
GUUCCGG

>EMBL\_CDS:CAI19076 CAI19076.1 Homo sapiens (human) DNA cross-link repair 1B (PSO2

CUUUCGUGACGGAACAAGGUAAGAAACGAUAUCUCUAGACCCUUGUUGACGAAGAACUAGGCGU  
UCCUACCACCCUCCGACGAAAAG

>EMBL\_CDS:CAI22995 CAI22995.1 Homo sapiens (human) dedicator of cytokinesis 7

CUCCCAUAUACAUCUCUUCUAAAAGACAUUCAUCAAAACCUUGUAUUUGUAGGGAACGCCUUUG  
AGAUUCUAAAGAG

>EMBL\_CDS:CAI41083 CAI41083.1 Homo sapiens (human) interleukin 15 receptor, alpha

CGACGACAACACCGGCGACACAACAAACUCGACCCUCUACUUCGACGCCCGAGGGCGCAGCGGCC  
GCCGGCCUCGUCGUCG

>EMBL\_CDS:CAB66695 CAB66695.1 Homo sapiens (human) hypothetical protein

CGCCCGAUAGACCCGGGCGUCCAUCAACCGGAGCAACGGGCCCUCCCACCCAUCGACUGCUGAC  
CGCACAGGUCCAUCGGACA

---

>EMBL\_CDS:CAH72822 CAH72822.1 Homo sapiens (human) polycystic kidney disease 2-like 1  
GACAUACGGCAGAGGACCCCAAGUAGAAGUCCGAAGAACCCAACCCGACCUCUCCGGGGCACGA  
CCUCUACCACGUC

>EMBL\_CDS:CAH70925 CAH70925.1 Homo sapiens (human) v-abl Abelson murine leukemia viral  
CCCACUCUAUUCUGACCGUGAAACACCAACACUCACCAACCCUCCUGCCCCGUCGGAACCGAC  
CUCUUCGGGUCGGGCCGACGAGAGGUAGGAGACCUUGAGGUCGGUAGGGUUCAGCACGGGGUGGU  
AAGAAGAGAAAUGGG

>EMBL\_CDS:CAI19765 CAI19765.1 Homo sapiens (human) small proline-rich protein 2C  
GACGACUCCACCCGUCGGACACCUGUGAAACCACCACCCGUCGGAGUCCCGUGAAGUCCCCAC  
CUGUACCGAGACCUGCGAAACCGUC

>EMBL\_CDS:CAB66751 CAB66751.3 Homo sapiens (human) hypothetical protein  
UACAUACAGUUGGUACUGACGUAAGACGACCCACCUACUCGUCGUCCUACAUCGUCUGCCCCUC  
UAUGUA

>EMBL\_CDS:CAI23384 CAI23384.1 Homo sapiens (human) chromosome 1 open reading frame 84  
AAGGACAAGUCUGACUUCGUCGUAGAGGACCCACACCGGACGUGUCAACCACGUCUACUGACU  
CCUUGGUUCGGUCCGCUUGUAAAAGCCUCUAAGCUAUUAGGAAAAAGUAAUUGUCCU

>EMBL\_CDS:CAQ52599 CAQ52599.1 Homo sapiens (human) spastic ataxia of  
GGAUUUUCUGAGUUUGUUGAGUUCUUGGAAGACGAAUAACAUCUCCAUGAUGAUUCAACACUUC  
CAACAUC

>EMBL\_CDS:CAB66709 CAB66709.1 Homo sapiens (human) hypothetical protein  
GAGGGAAUCGACUACCUCUGACUUGAAGUCGUCCUCGGAGAAGACGUCUUCAGAGGAGUCUAUCA  
CCUC

>EMBL\_CDS:CAB66530 CAB66530.1 Homo sapiens (human) hypothetical protein  
CCAGGACGAGGACAAACCUCGACGACGACGCGUCCGACGCGGCCUACUACGAGUCGUCGCCGAGG  
UCGUCGAGGUCCUGG

>EMBL\_CDS:CAI20013 CAI20013.1 Homo sapiens (human) molybdenum cofactor synthesis 1  
AGCGUCCACUAGGGCGUCCCUAUGGAGUCUCAAGGUUUCUCCGUCUGGAACUCCAAGGGUAGUC  
GACACU

>EMBL\_CDS:CAI16092 CAI16092.1 Homo sapiens (human) potassium channel, subfamily U,  
ACGACUUAAGAGAAGAAACCAUUAUAUUUAUUUUUCGUUAACAGACAUCUUAAGUAUUACAUAUAG  
CUCCUGGACCUAAGUCGU

>EMBL\_CDS:CAI15169 CAI15169.1 Homo sapiens (human) POU class 2 homeobox 1  
CGGACACGGACACGGACGACCUCAUCAUUGACAACGACCCGUCGCGAGUUUCAUUCGGGUCAAUA  
GACAGGAGGUCGAUCGUUAUUCGACCCA

---

>EMBL\_CDS:CAB66825 CAB66825.1 Homo sapiens (human) hypothetical protein  
CCGCUCAAGUAGGUCCCUCGGCUUCCACCACCCCCGGCGCUCGAGGUUCCGACAGACCCUCUUGA  
ACGG

>EMBL\_CDS:CAC19507 CAC19507.1 Homo sapiens (human) novel protein  
GUCGUAGAGGAGACGGACCCUCUUCCAAAGCCAUUUUCACGAAUUCGACAAGUAUCCCGUCUC  
CCUCGACGAC

>EMBL\_CDS:CAI22864 CAI22864.1 Homo sapiens (human) Fc receptor-like  
5  
UACCAUGGUAAAACAAAAGACACCACUCAUCUUCGCUUUAGGGAACGUUCACUCCCAGUGAGAGA  
GAGGAACCUUCUGACACCAGGUA

>EMBL\_CDS:CAI95133 CAI95133.1 Homo sapiens (human) novel protein  
CGGUCCCCGAAAGUCCAUCUCGAACCGGUUCCAGAGUCUGACUUUUUCGACCCCGACUACCUCGAG  
GGUAAACUUCGGGUCCG

>EMBL\_CDS:CAB63721 CAB63721.2 Homo sapiens (human) hypothetical  
protein  
GACCAUAAGGACUCACUCCACCCUCGCGACCCAGUGUGUCAUGUGCAUAGAGAGGUCCUGUAUGG  
UC

>EMBL\_CDS:CAI23448 CAI23448.2 Homo sapiens (human) hypothetical  
protein  
UCGUCCUGUGUACCAUCAUGAUGGUCUGGUCUACCCUACACAACACAACCGUAUAUCUAGAAAAG  
AUUAUAUUCGUAGUGUAGAGUACCCACUGUACCUUCACGAUAGAACUCACGGUGACGA

>EMBL\_CDS:CAB70899 CAB70899.1 Homo sapiens (human) hypothetical  
protein  
UACGCCGGAGCAGUCGCCGUCGGUCGGGAGGAACAACCCGAGACGCUCUAAGAAGGGAAGGAAC  
UAGUACCAGAAGUCCGGAGAAGUAGCGGUAGGAACUACCGGAAUAGUUCCCCAGGCGUCCGCG  
GUCGACCCUCCAGAACUUGUUCGACGACGACAUAAAGACGUA

>EMBL\_CDS:CAH73567 CAH73567.1 Homo sapiens (human) A kinase (PRKA)  
anchor protein 2  
UCGCCCAUACGGGACGUCGUCGGUAAAGAGGGCUUCGUGAAACCUGAACCUUACGACGUCGUCUU  
CAUAGACGA

>EMBL\_CDS:CAI21524 CAI21524.1 Homo sapiens (human) RAE1 RNA export  
1 homolog (S.  
CAAACAAGACCGUAGAAACAGGGUCUUCGACUUAGAUGGUAGUCUAGGGUGUCAACGUUCCAC  
GGUACUUGUCCUA

>EMBL\_CDS:CAH73982 CAH73982.1 Homo sapiens (human) human  
immunodeficiency virus type I  
CGUCUCCCAGGCAAUGAGGAAGGUCUCAGAACAAGACACGACCCAUUGGAAGACCGUUUCCCUCA  
ACCACCUGAGUGACA

>EMBL\_CDS:CAB70832 CAB70832.2 Homo sapiens (human) hypothetical  
protein  
GUCGUCGACAGACAAGACACCUCGAGACCCGGACUAUCGCAAACGGCAACCACGGGUGCGUGGUGU  
GAAGGGCGACCUCGUCCCCGACGAC

>EMBL\_CDS:CAH71782 CAH71782.1 Homo sapiens (human) Nedd4 family

interacting protein 2  
GAGAAGGAGGACUUAAGAAACUCUACAAAGACGACGACGUCGACGGUAACGUCGUCGAAAUCGGA  
AGAGUCGAAGUAGCAUACAUCUUCUC  
>EMBL\_CDS:CAH70133 CAH70133.1 Homo sapiens (human) zinc finger,  
MYM-type 2  
ACCACACUCUCUCAUCUAGGAGAAAAUUGAAAUGACUAAAUCUUCUAAAAUUGAGUAGAUUAUGG  
U  
>EMBL\_CDS:CAH72509 CAH72509.1 Homo sapiens (human) guanylate cyclase  
type protein  
CGCUGGAGGAGCCACAAACCAUCUGAACAAAGGUUUUCGGAAGCAGAGGUGCCGGAAAAGACAUC  
CUCGACUCCCUGUACUCUUCGUCACUGGGUAUGUGGAAAACCUCCACG  
>EMBL\_CDS:CAB70719 CAB70719.1 Homo sapiens (human) hypothetical  
protein  
GUACCGCACCCUACCACACAGAACUCUAUCGUUAUAGAUCUCCUACGUUAUAGAACCCUACAGUACA  
GUAC  
>EMBL\_CDS:CAC05478 CAC05478.1 Homo sapiens (human) progesterin and  
adipoQ receptor  
CUUCUCCUAGACCUCCACACCAUGGUCCGACGAACGAGGACCGUCGGUCGGUCCACUGUCUCGC  
GGUGUGCCACACGGUGUCCCGACUACAGAUCUUAUUUCGGUCUGGACGACCGUGGUGAACUGUC  
UAGAAGGAG  
>EMBL\_CDS:CAB66731 CAB66731.1 Homo sapiens (human) hypothetical  
protein  
ACAAGAAGGGUGAGACCUUCAGAACUAAAAUUGACAAAUUUUAGUAUACCGACCCAGUAUUAUCC  
UUCUUAU  
>EMBL\_CDS:CAH72176 CAH72176.1 Homo sapiens (human) novel pseudogene  
CUCAUGUGUGUCGACCCACCUUCUCUUGUGUCAAGACCAGUAGACAAAGAACUGGUCCUGAAACA  
GAAGGAAAAAACGCCACGAG  
>EMBL\_CDS:CAB66803 CAB66803.3 Homo sapiens (human) hypothetical  
protein  
GGAACUGGAGUCGAUGCUGCCUCCCGAACCGACUCCCCGACCCGAGAAGACUCCGACCGAGAGA  
CCCAAGAGGACGACCCUAGCUCC  
>EMBL\_CDS:CAB70673 CAB70673.1 Homo sapiens (human) hypothetical  
protein  
CGGUAAAAGAACUAAAUAUCUACUJACAAGUCGAAAGAAAAGUCCUCUUGGACUACUCUUUACU  
UUCCUUGUCUUGGUUUUCCUAGAAGACCUCCUACCA  
>EMBL\_CDS:CAI23454 CAI23454.2 Homo sapiens (human) hypothetical  
protein  
ACGCAGAUUCGUCGACGCCGCCCGAUCUUGGCGUCACUCGAGGAGCGUCGACGACGACGCGU  
>EMBL\_CDS:CAI23380 CAI23380.1 Homo sapiens (human)  
myeloproliferative leukemia virus  
CGACCGAGGAGGGUCGACUAGACUUAAGGGACCGACCGAGGGUGGGUACCGGAACUACUAUGA  
CCCCCUCGGCCG  
>EMBL\_CDS:CAQ08768 CAQ08768.1 Homo sapiens (human) ribosomal protein  
S26 (RPS26)

CUCCAACCACCCGUCGUGGGUGUCCAGAUUUAGUCCCAACCCACAAACCAGGAAUGGCCGAAG  
>EMBL\_CDS:CAB66720 CAB66720.1 Homo sapiens (human) hypothetical  
protein  
GUCUCCGUCGCCGUCGAGGACCUCGACCCGGAACUGGGCCUGAGGUGGAACAGCAUGAACCCA  
CUCGCGGUGUCUCGAAAGUCCCCGGACCCGACCGGGAC  
>EMBL\_CDS:CAI16091 CAI16091.1 Homo sapiens (human) potassium channel,  
subfamily U,  
CAUCAUUUGGUAACCUUUGGUUGUCUAACGUAGGUCUUUUACGUAUAGACCGCCCAAUAGGUUUAU  
CGUCAUGAUA  
>EMBL\_CDS:CAH69976 CAH69976.1 Homo sapiens (human) muscle, skeletal,  
receptor tyrosine  
CGGCUCCGAAGAAGAAACUCGUAGAAAUGACGGUGGUAUCACUUUCCAAGUAUCCCUUCAUUCGG  
ACCA  
>EMBL\_CDS:CAI22140 CAI22140.1 Homo sapiens (human) Rho guanine  
nucleotide exchange  
CCUAUACGGAGGCCUGGUGGACGACUCCCCGAGUCCGGGAGACCGUACCCCGGGUCGAGACCCCGA  
CCCCCGAACUACAGG  
>EMBL\_CDS:CAI41303 CAI41303.1 Homo sapiens (human) transmembrane  
protein vezatin  
CCUAUGACCUUAGUUAUCGAGUCACUCGAGGUGUAGGAGAACUUUGUCCUGAAGGACAACGUCC  
UACCAUACAUAUCAACUCAGCCUJAGGUUAUAGG  
>EMBL\_CDS:CAM28254 CAM28254.1 Homo sapiens (human) RAE1 RNA export  
1 homolog (S.  
GGCCGUCCAACCACCCGAUUUUCUGUCUGUUGGUUACGAUAGUAGUCCUCUACUACAAUGAAGU  
UAUAGGAAGUACCCUAACACUAACAGACAUCAACGUGACGGUUUGUACGACC  
>EMBL\_CDS:CAI12437 CAI12437.1 Homo sapiens (human) ankyrin repeat and  
sterile alpha  
CUCCCCACACGAAGAAUCACAACGUCGAGUCCUCCAACCCACACGUAAUUCUCGUAAAAGUGG  
UGGAG  
>EMBL\_CDS:CAI95134 CAI95134.1 Homo sapiens (human) transforming,  
acidic coiled-coil  
CGGCCGUGACCAACGACGGACGGAAGACCCAAAGUAGUGUACGGAGACAGAGACCCCGUAGGAC  
CCACCCACACUGAGGCCCGACCGCCCGCGGUCCCGACCG  
>EMBL\_CDS:CAI22280 CAI22280.1 Homo sapiens (human) KIAA1324  
CAACAGUGGGGUUAUUCAGCUAGUCGUUCCGACUGUCCGACACUCCUUUGGGCCGGAACAUCGG  
ACAGUGGAGACCCCCUACUACUG  
>EMBL\_CDS:CAB70809 CAB70809.1 Homo sapiens (human) hypothetical  
protein  
ACGACCGUCCACGAGGAACCUCCACUAUUAACCAGGUACAGUCAAGCCUACUGCCGGACGUAC  
CGGCCGACGUGGACGACGUGGAACCUUGUCGU  
>EMBL\_CDS:CAI16917 CAI16917.2 Homo sapiens (human) novel pseudogene  
(KIAA0563, FLJ34306)  
GGAUGACAAGGAGACCACGCCAAUUCGGAAUAAAACCCGCAUUGAAAGUCUGACGUGGUCACUU  
AGGACUCAUCC

---

>EMBL\_CDS:CAI22406 CAI22406.1 Homo sapiens (human) latrophilin 2  
AACUACGGGUCUCCUUUAAAUUUCAGAACCUAGACAGGAAGACAUGACUCAUGCCGUUGAAGGUC  
CUGUUUAAAAGACACCCGUAACU

>EMBL\_CDS:CAI13041 CAI13041.1 Homo sapiens (human) chromosome 9 open  
reading frame 3  
AACUACUGGUACAGAGGUAGAAGUAAAGACAGGUCGUAGGGUGACGUUAAACACUCCACCUCCGA  
CCGUAACC

>EMBL\_CDS:CAM15931 CAM15931.1 Homo sapiens (human) novel protein  
ACGACUCAGGACACGUGCAGAACCGGCAAAACCGCAUACAUCCUACACGUCACGUAAAGUCGU

>EMBL\_CDS:CAQ09540 CAQ09540.1 Homo sapiens (human) novel pseudogene  
ACUCUCCUUACUCGUCGUCGUAAACAGUACCAUCUCUUUCUGAGAGACCACUUCGAGAAGGUCCUC  
AAAAAGACGAUUUUGAAAACGAUCGAAAGAGUUUUACGAGAGU

>EMBL\_CDS:CAI40484 CAI40484.1 Homo sapiens (human) NADH dehydrogenase  
1 (MUND1)  
AAAUACCAUAUCUCAAGACCACUUUAUACCAUACAUCACGAGGAUCCUUCUAUCACCAUCAUUC  
CCGUAAAUAUACUAUUUAUAAGUACAUGAGACGAUUAUU

>EMBL\_CDS:CAH72050 CAH72050.2 Homo sapiens (human) collagen type IV  
alpha 2  
CCGGGUCAGGACCCCCGGGUAAAAGAGGACCUCAUGGGAAGCAAGGUCCAUAAGGACCUAUCGGA  
CCCAGGGGACCUCGCCG

>EMBL\_CDS:CAI22896 CAI22896.1 Homo sapiens (human) complement  
component 1, q  
CCAGAGGUCGGUCGGGACCUUCGGGAAAGAGAGGAAAAUAGGGACCCCAGGGUCCAACCGGUAGC  
CCCGGUCCACAGGGUCCCUAUGGGCCCUACGGUCCCUACCGACCCCCGG

>EMBL\_CDS:CAQ10023 CAQ10023.1 Homo sapiens (human) novel pseudogene  
CGAUUCAGCGAAAACCUAUAACUUAACCCCAAUAUUAGUGGGUCUUUUAAAUUUCCGCCUCUCG

>EMBL\_CDS:CAI19463 CAI19463.1 Homo sapiens (human) peroxisomal  
biogenesis factor 6  
GGGUGUCGGACCCCCGGGGCAUCUUCUGUGACGAUCAAGGACAGUCGUCCCGUGGGGGACCGA  
CCUCC

>EMBL\_CDS:CAI39429 CAI39429.1 Homo sapiens (human) DCN1, defective  
in cullin  
CGGCGAGGUCGAAGAAGAACAGGUGUCGCAAGGCGUACCUGAGGGACACCUCGCUCAGACCCAAA  
ACCUUCUUCGACAGGCACCG

>EMBL\_CDS:CAH73425 CAH73425.1 Homo sapiens (human) mitochondrially  
encoded AUP  
UCGACACCCUUUUGAUUAUCGAUUAUCAUGAUCACACAGAGGACGUUAAUUUACAUAUAUCAUCA  
CUGACUGAUUAUACAACCGACAUAUACGUGUCGA

>EMBL\_CDS:CAC88170 CAC88170.1 Homo sapiens (human) ubiquitin specific  
peptidase 20  
CCUCGUGUGCAUGUCCACCAAGUGCCGCCCGGUGGGGGCUUAGACAACAUGUCCACGAGG

>EMBL\_CDS:CAH70819 CAH70819.1 Homo sapiens (human) olfactomedin 1  
GACGGGAGCGACAGGACCCGUCUCGACAUGUGGACGGUCGAGAGGAGUCCCAACCACCCGUC

>EMBL\_CDS:CAI40281 CAI40281.2 Homo sapiens (human) chromosome 9 open

reading frame 102

CCGACGUUUGAACUCUUUAAAACAACCAUCUUAGAAAUUACUGUUCCAAAGUCUUAGACUGUCG  
GAACCAAAAUUUCUCUAAGAGAAAUAAGUCUAAAGAAGGCCACGCGA

>EMBL\_CDS:CAI13431 CAI13431.2 Homo sapiens (human) CUAGE family,  
member 5 (CUAGE5)

GUCAAAAAGAAGUAAGUAAACUUUAGGGAAACUCCAGUAAAACCGAAGUCAAUCAUCACUAAACU  
CCCUAAAACUGAGUAGAAGAUCUCUGAC

>EMBL\_CDS:CAI16234 CAI16234.2 Homo sapiens (human) novel pseudogene  
GCCUCUAGAGGGUUACCGAUUGGUAUCCGACGGCGAGGAACGACAGGUCGCCGACGAGGACCACG  
ACCUCUCUAGAGGC

>EMBL\_CDS:CAM27610 CAM27610.1 Homo sapiens (human) obscurin,  
cytoskeletal calmodulin and

GAGCGGACCUCGACUGGGACCCUUGACGUCCCCGGCCCAAACCGGAGGGUCCUUCUCUC

>EMBL\_CDS:CAO03600 CAO03600.1 Homo sapiens (human) likely orthologue  
of Mus musculus

CCCUACUCCGAUACGAGUAGGCAGGGAGCACUAUUUCCAUCCUAGUCGUAUCUUUGGGAGUAAA  
G

>EMBL\_CDS:CAI95112 CAI95112.1 Homo sapiens (human) PHD finger protein  
19

AACUCCUCUACACCAGGAGCUAGACAGUGACCCACGACCACUCGAACGGUUCGACGUCCUCGAG  
GGUCACCACCAACUGUUUCCGGUCUUAGAGGAGUU

>EMBL\_CDS:CAQ10511 CAQ10511.1 Homo sapiens (human) novel pseudogene  
ACACACUCCAUUCUCGGUGGAUUAAGACCGUAGUCAUCCUUCUUCAGUUUUGACGAGUCUUC  
ACCUCGAACCGAAGUAUCC

>EMBL\_CDS:CAI15983 CAI15983.1 Homo sapiens (human) CD274 molecule  
ACCGAGGGUCUAAAUGGUUCACUCAGGAAAGUAAACCUCUACACGGUCUCCAUCAAGACCCUAC  
UGGU

>EMBL\_CDS:CAI16895 CAI16895.1 Homo sapiens (human) ring finger  
protein 38

UCCCUUACCACUAUCAAAAAGUAGAACUGAUUACCUUAAUACAGCUCUGUCUGCUAGGGAAGAAG  
GA

>EMBL\_CDS:CAB90482 CAB90482.1 Homo sapiens (human) human type XVIII  
collagen

CCUCCAGGUCCCUUCGGAGCUCUCCUGGGGCGUCCCGGAGGUCUAGCGGGGCUUCGGUCUAGGGAG  
GUACAGUUACUUCAGUCGAACAGCACAGACUUCUCCUCCAGGACCCCGGGACCUCGGGAACCC  
CAGGACCCCGGGAGAGAGAGG

>EMBL\_CDS:CAQ09916 CAQ09916.1 Homo sapiens (human) pseudogene similar  
to part of

UCCUCGUUAUCACCUUCCGUCGAAUCGUAACGGACUUAUUCUUUUUCUGUUCGAAAGAAAUU  
AAUUAAGGUCUCAUUACACUAAAGGUACAACAGGA

>EMBL\_CDS:CAI23559 CAI23559.1 Homo sapiens (human) single stranded  
DNA binding protein

CGACGGCAUUAAGACACCCGGCCUUGGGUACCCGGGGUACGGAGCCCCUCCCAAGUAAGAGACGU  
AACUAGGAGGGUACAACCCACCGGAACAACAGCACACCCUAGGUUAUCUUAACCCGUCG



---

>EMBL\_CDS:CAB82417 CAB82417.1 Homo sapiens (human) hypothetical protein  
CAACCGGAAAGACUCCGAUAUACAGUCCUAGCAGGACUUCAGAACUCCAAGACGGUUG

>EMBL\_CDS:CAI15920 CAI15920.3 Homo sapiens (human) chromosome 9 open reading frame 48  
GGGUAGGACCUGGUCGACGAGGCUCCCUCUCUGGGAAGCAACAGACCCAAGAGGUCCUCCC

>EMBL\_CDS:CAH72907 CAH72907.1 Homo sapiens (human) interferon pseudogene  
AGAGUACCUCUUAUAACCACCGGACUCGGAAAACCUAAAACCACGGUAGGUAGACGAGGUCCUCU

>EMBL\_CDS:CAQ07755 CAQ07755.1 Homo sapiens (human) interleukin 6 receptor (IL6R)  
UCCGACGACCCCCUGUGACUCCCUCUACUCUCCUUGUUCGUGACCCCACCAAGAUCAGAGAGA  
UCCUGGUCGGUGGGGUUCUUGUGUUGGUCACGUAGGACUAGAAUAGAAGAAAGUCUGGGACGUU  
GAA

>EMBL\_CDS:CAI14820 CAI14820.2 Homo sapiens (human) novel protein  
GGACUGUACGAACAGUGGCUACCGUACCACCGCUUCGGUCCAGAAGGAACCCUUGCGACGAGAC  
GGGUCCACUGUCCACAUUAUGUCAACCC

>EMBL\_CDS:CAQ10338 CAQ10338.1 Homo sapiens (human) NHP2 non-histone chromosome protein  
GAAGUGUAUCCUCGACCUACACAUCUUUCUAGAGGUUCUAAACACCGGUAGUGCUAUUAAAACCU  
CCACAGAAAAAUUUUCCAGAGUAACCGAGGAAAUGUUUC

>EMBL\_CDS:CAQ07400 CAQ07400.1 Homo sapiens (human) novel pseudogene  
CGAGACCCCGCGAGGGCAUCGAACCCUCCGAAACCGGAGUCUUCGUCCAUCCCCCACAAUGACCC  
G

>EMBL\_CDS:CAI14818 CAI14818.1 Homo sapiens (human) tubulin folding cofactor C  
ACGAAAGUUGACGGCCCCCUACGGUCCUCGGCGCAGAUGAAACCAUCUGCUUCGUCGUAGGAAA  
GGGGCCCAGAACUUUCGC

>EMBL\_CDS:CAI10944 CAI10944.1 Homo sapiens (human) protein prenyltransferase alpha  
AGAAGAUCUUCUACCCCUUCUAAUJAGGAACCAAGAAGACAACUUGACGACGAAGAAGUAGAAA  
ACCUCCU

>EMBL\_CDS:CAH70960 CAH70960.1 Homo sapiens (human) far upstream element (FUSE) binding  
CGACCCCUUGGGGGGACUACCACUAGAGGGCGUCCAACCCCGAGCGACAACCCUCCCCCAAGGAG  
ACUUCG

>EMBL\_CDS:CAH72910 CAH72910.1 Homo sapiens (human) interferon, omega 1 (IFNW1)  
UACUUCAGGUCACACCUCAACCAGGUCCUCCAGCACAAGGUCCGUCGUCUCCUCGCGAGACACA  
CCUUCUCCGACUUCUAGACGACGUCGUAGAGUACCUCCUGUCUGUCCCGGACCCGGACGACGUUG  
ACCGACAGUA

>EMBL\_CDS:CAH74092 CAH74092.1 Homo sapiens (human) KIAA1614  
AGACAGACCAGUGGGUCGGACUCGUCAGGUCGGUCCCGACGGAAGGACACUCUGUGACCGCUCCA  
CCAAAAGGAGCUUCCCCUCCCCAACCGCGGGUCGGAAGUCCUGUGUUCUUCGACAACCGACGG

UCCGAACCACACCCCGUCU

>EMBL\_CDS:CAC16001 CAC16001.2 Homo sapiens (human) CGI-121 protein (CGI-121)

UAAACGACUCUAUGGUGUAAAAAAGUUACGGAGACUUUAUAACAAUAAACCCCUUCCAACUUUU  
AUUAAAGUCAUCUA

>EMBL\_CDS:CAQ06692 CAQ06692.1 Homo sapiens (human) olfactory receptor pseudogene

AGGGACAAAGAGUCCGACAUCUACUUCSCCAAGUCGUACSCCCACUGGUGGCACAUGUAGUGACU  
CCGGUGACGUCGGAAAGAGCCCU

>EMBL\_CDS:CAI39663 CAI39663.1 Homo sapiens (human) myeloid/lymphoid or mixed-lineage

CUUAAUAGUCCAUUUUUUCGACAAAGGAUUAUCUCCCGAGAAUGACGACAAGUCCUAGUCAUCA  
UCCUCGUCAGACACGACUUUUACACAUAAACUACUCUG

>EMBL\_CDS:CAQ09825 CAQ09825.1 Homo sapiens (human) hypothetical protein

CCCGUCAUCCCCGACACGAGACCGUCCGUCCGGUACCUCAGUGUCCUGAGGUUCCAGACGUUCAC  
CUUCCUCGAGAGGACCAGGACGUACGGG

>EMBL\_CDS:CAB90455 CAB90455.1 Homo sapiens (human) hypothetical protein

UCGACUUAACAAAGUUUUUAACCAAAGACAUCCUACCGAAGGUUAAAUAUCUACGUUAUGUCG  
A

>EMBL\_CDS:CAH74053 CAH74053.1 Homo sapiens (human) solute carrier family 12,

GUCACCGGUACGUCCACUCGUGUGUCCACGGCAUUUGUGCGUACAACAAGUCGUACCGACGAC

>EMBL\_CDS:CAI22065 CAI22065.1 Homo sapiens (human) ryanodine receptor 2 (cardiac)

CAACCUAAAAGAACCAAGCCAGUAGGUCUUCUCACAUCSCCUUGUUCGCUCCUAAAAGAAGACAAGA  
AAUGCAGGACAACCUACGGUAUUCAGGUCG

>EMBL\_CDS:CAQ08581 CAQ08581.1 Homo sapiens (human) novel pseudogene  
AGGAGACACSCCAUCUCGUCCAGGUCUAUCUGGAGAGAGACCAACUGGUUCCGGAAAGGGGUAACU  
CCU

>EMBL\_CDS:CAQ07592 CAQ07592.1 Homo sapiens (human) 60S ribosomal protein L12 (RPL12)

ACAACCCUUUACAACUGUUAGAGUAGUUUUCACUAGAAAAGUGAUACAAACUACAAGACAAAGAA  
AGAGGAUCGU

>EMBL\_CDS:CAI15578 CAI15578.1 Homo sapiens (human) G protein-coupled receptor 111

UGAGAGAAACAGUUCUCUUCGAACGAUGUUUAGUGUCCGACSCCGAGAACAUAACCUACUCUCA

>EMBL\_CDS:CAH72236 CAH72236.1 Homo sapiens (human) thymidylate synthetase (UYMS)

CUUCGGUCCCGUCUUACACGAACUAGAAGAGACSCAUGACGUCAACCGGAGUCUCUACGUCGGGA  
CCGAAG

>EMBL\_CDS:CAI20310 CAI20310.1 Homo sapiens (human) erythrocyte membrane protein band

CGCCCAGACACGAACCCACGCCGGUGAUUAUCGCUUUAACCCUGGGGUUCCAGUCCUUGAACCGAA  
AACCACCGACGAGACCUCUUUGUUCGGACA

>EMBL\_CDS:CAM14169 CAM14169.1 Homo sapiens (human) ankyrin repeat and  
sterile alpha  
CCGACGAAAAAAGGAGACCCGUCGCUAAACCCUGUUCUGUAACAGAUACGACGGUGGACUCGCCA  
AUUCGUCGA

>EMBL\_CDS:CAQ08002 CAQ08002.1 Homo sapiens (human) ribosomal protein  
S3A (RPS3A)  
UCUGUAGUACCUCUCCUGUUUGUCUAACCGUUCGGAAAAUACAGAAAAGGUUACGACAGA

>EMBL\_CDS:CAI12548 CAI12548.2 Homo sapiens (human) collagen, type XV,  
alpha 1  
CAGACGGAGGACGUCGGGUGACCAGAGAGGUCUACGGCUCUCCUGAGAAGUCCCAGUGUGUCGAGGA  
GCCUCAGGACCCCAGCCCCACGUGCCACUCGACGACCUCUCCUCGG

>EMBL\_CDS:CAH73281 CAH73281.1 Homo sapiens (human) chromosome 20 open  
reading frame 45  
UACAACCGGUCCGACCAGAGCUUGAGGACUAGAGUCCACUAGGAGGACGGAGCCGGAGGGUCCA  
CGACCCUAAUGUCCUCACACAGUGGUACGGACCGGACGUA

>EMBL\_CDS:CAI13397 CAI13397.1 Homo sapiens (human) chromosome 6 open  
reading frame 190  
GUUCUUCACAGAAAUCUUUUUACGAAGAUUAAAGACUUCGAUUCUAAGAACUACGGACCAUGA  
AAAAC

>EMBL\_CDS:CAM21543 CAM21543.1 Homo sapiens (human) protocadherin 15  
CCGUUUCACCUCUUACUCUUCACUCCGGACCCUUUCGUUUUACUUCUCAGACUUCUCUCUAAA  
GUUGACAAGACAAGGAAGAUAGUAGUCACAAAGUGGAACGGAAUAAAGGAGAAAGAGACAGUUUA  
AACGG

>EMBL\_CDS:CAM22929 CAM22929.1 Homo sapiens (human) chromosome 10 open  
reading frame  
ACAUAAAAACAAGGAACUUGCAAAAAACCUUCGUUGACGAAGGUCUUUGAAAGGAAACUUAUCAG  
UUUUUUAUGU

>EMBL\_CDS:CAI16805 CAI16805.1 Homo sapiens (human) chloride  
intracellular channel 5  
UGGGAAGGUAACUCUACGGGGACAGGAGACCCCGAGUGGACCUACUCGGAGGACCUCAAGUCUC  
AUAUAGAGUAGUCCGUCCUCA

>EMBL\_CDS:CAI16482 CAI16482.1 Homo sapiens (human) hypothetical  
protein  
CAUCGACGACAAGUAUAAAACCCGUAAUUCGUACACGUACAGGUGGAGGAAGUACCUGUACACCG  
GGGACUUGUACCGUCGAUG

>EMBL\_CDS:CAM14602 CAM14602.1 Homo sapiens (human) thrombospondin,  
type I, domain  
GACGAGCGAGUCGAGCGUCUAUAAGAGGAGCAGGCUCAAGAAGGCCUUCGACCCCCUCACCUACC  
UCAACACAGCUCGUC

>EMBL\_CDS:CAC40698 CAC40698.1 Homo sapiens (human) dJ1104A8.1 (novel  
protein)  
GUGAACGUAAAGACUAAAACUGUAACUCAGAACUACGGAUUCAUAUUCUAAAAGUAAACCAAGAA

AUAGUCCUCACCACUCAC

>EMBL\_CDS:CAI22937 CAI22937.1 Homo sapiens (human) ataxin 7-like 2  
CGACCCGGGACGGGUAAGUGAUGUACCGUAAAGACUCUCGACCGUCCCGACCUCACCCCCACC  
CCGGGCCG

>EMBL\_CDS:CAI15464 CAI15464.1 Homo sapiens (human) novel protein  
CUGAAGGAGGUCAAGGCCGCCUAGGACCGUGAAAAGAAGGAUCUCACGUCUAUGACGAGUGACCU  
CCGACAG

>EMBL\_CDS:CAH71701 CAH71701.1 Homo sapiens (human) DEAH  
(Asp-Glu-Ala-His) box

UCACAGUCCUCAUAGUCAUUCACCCCGCCUCUACGAUGGGUUUUCGACCUUGAAGAAGUGA

>EMBL\_CDS:CAH72941 CAH72941.1 Homo sapiens (human) platelet  
endothelial aggregation

GGAACCCGGGUGGACCGGCGAGUCCCAAGACGUCCGACCGUUUCGCCCCGGACCUUGGAACAA  
UCCCCACCCCAAACCCC

>EMBL\_CDS:CAH72281 CAH72281.1 Homo sapiens (human) tudor domain  
containing 3

AAACCCUCAGAGAAACUUUUGCUCCGCCAAAAGUAAAGAACCGACGGACCAUAGUAAAGCUCCU  
CCUACAGAGUCU

>EMBL\_CDS:CAH72748 CAH72748.1 Homo sapiens (human) novel pseudogene  
ACAGACAAAGAGUCCAAAUAGGUAAUGUGUCAAUACACUCCUUUACCUGAACAGUAUAUCUGU

>EMBL\_CDS:CAH72940 CAH72940.1 Homo sapiens (human) Rho guanine  
nucleotide exchange

AAGAGUUUCACGACUUACUACAAGGAGUGUAAACGGACCAAACUGAAGGUGUCCCCUGUUCUUUA  
UACUUUACACGAAACUCUU

>EMBL\_CDS:CAH72663 CAH72663.1 Homo sapiens (human) calmodulin binding  
transcription

AACGAAGGACUAUAAACCGAGAAGGUCUGAGUCACGUCACCCUUCGUCGAAGAGGACGGAACAGA  
CCUUCAUGAGUCCCAAGUU

>EMBL\_CDS:CAI12394 CAI12394.1 Homo sapiens (human) poly (ADP-ribose)  
polymerase family,

GGUCAACAGAAGACUUCGAGUCAUCAGCUGUGGUAACAUGCJUUAAGAAAGAGAACUJAAUCACG  
UGUGUCUCAACGGACACACGUCACUCCUUACUUAGGUUUCUGUUCUCCUCAGCUAGUAAACUCUUUGU  
UCCUGCCGUGGACC

>EMBL\_CDS:CAQ06897 CAQ06897.1 Homo sapiens (human) DEAH  
(Asp-Glu-Ala-His) box

UCCGUCUUACUCCAGUGGAGGUACAUCUCUCGUAACCAGCACUGUAGAAGUUACAGAA

>EMBL\_CDS:CAI15500 CAI15500.2 Homo sapiens (human) ADAMUS-like 4  
CCCGGCCGUAAGUCAAGUGUCGCGACCCUCGGGACCUGAAGUCACUUCGAGGGUGACUAUGU  
CGACCGGG

>EMBL\_CDS:CAH73232 CAH73232.1 Homo sapiens (human) ankyrin 3, node  
of Ranvier (ankyrin G)

AAGUAGAACGUCCAGUAUCGGUAGGUCUCUCAGCUAGAGACACCGUAGGCACAGUACUCUUUUGA  
GACGACACCACCGUUACCUUGUGAGACACUACCU

>EMBL\_CDS:CAI21793 CAI21793.1 Homo sapiens (human) potassium channel,

subfamily K,  
ACACUAGCUCCUCUCCUGUCAACCAGUACGAGAUACUACACGUGGACUAGGAGCAGGAACAGGA  
AGAAGUGU  
>EMBL\_CDS:CAH73228 CAH73228.1 Homo sapiens (human) transmembrane  
protein 206  
CCUCCGCCUGAGCGACAGGUCCGGACCAUUCUAUGGGCCUGGAACCUGAGACUGGCAGAGG  
>EMBL\_CDS:CAI12685 CAI12685.1 Homo sapiens (human) chromosome 9 open  
reading frame 86  
AGGAGGUGUGAGACCUGGCAACGACCCGGGAGACGCCGGCCUGACCGAGACCUCCACCUC  
>EMBL\_CDS:CAI14117 CAI14117.1 Homo sapiens (human) BUB (POZ) domain  
containing 14A  
GCUCGACGAGCGACCGGCAGUACCACUCGACGGGCACAUCGUCUCCUGUCCUAGACGACCUUC  
GUCCGCCCGCCGUGCCUCGGCCCGUCGAGC  
>EMBL\_CDS:CAI22394 CAI22394.1 Homo sapiens (human) mutS homolog 4 (E.  
coli)  
AAACUCCUAUUAUCAUAGAGCACGUCUUCUACUCGAACGUGGUUUUCAUUUAAAACUACGUUGA  
CACAAAAGACGUUUCGAGAAAACAAAGGUUU  
>EMBL\_CDS:CAI14911 CAI14911.1 Homo sapiens (human) sprouty homolog  
2 (Drosophila)  
CCGCACGUCGGGUUAGAAGGAACGAGUCACCGAAUUCGAGUGGACCGAACUCGAGUCUAAACC  
CAACGUGGG  
>EMBL\_CDS:CAQ08176 CAQ08176.1 Homo sapiens (human) eukaryotic  
translation initiation  
CAGGAGUCGAUCUUUCAGACAAUCCCUCUAUCAAAGGAGAAGAAUAAGCAGAAAAACGACUCC  
GG  
>EMBL\_CDS:CAI16862 CAI16862.2 Homo sapiens (human) AU-hook  
transcription factor  
ACCCACCGUGCGGUCCCGGACCUCCCCGACGGAGUCGGAACGGGUCCGGACUGUACACGGGCAG  
AGAU  
>EMBL\_CDS:CAI16233 CAI16233.1 Homo sapiens (human) collagen, type  
XXIV, alpha 1  
AAGGUUCCUCAGGGAAACCAGGAAGUCCCGGCAAAACAGGUCCUAGGGUUAUAGAGGACCUUUU  
GGGAGACCAGGACCUCCCGGUCUACCAGGAACCUC  
>EMBL\_CDS:CAI13215 CAI13215.1 Homo sapiens (human) misato homolog 1  
(Drosophila)  
AUCCCUAUUCACAAAACCUCAACAUCGCCACCCUCACCACUCCUUGGAAACACACACCACUCG  
AAGGGGACGGUACGAUAACGUCGUAGGUUGACAAACAGGGAC  
>EMBL\_CDS:CAH71957 CAH71957.1 Homo sapiens (human) potassium channel,  
subfamily U,  
AAUCUCGGAGAGAGGGCAAGAAAAGAAAAGGUCAAACUUUCUCGUUCUCUCAUUGUCAGAAACCG  
AGACU  
>EMBL\_CDS:CAI19369 CAI19369.1 Homo sapiens (human) DENN/MADD domain  
containing 2D  
GCCCCUACUUCGAGAACUCUCACUGUCAGAAGGGUCCUCGUCCCUCCGACGGAGAGCCUCCGGG

AC

>EMBL\_CDS:CAI41373 CAI41373.1 Homo sapiens (human) ankyrin 3, node of Ranvier (ankyrin

CACAGAGGCAUCAGUUACAAAUAUACCCACUGUCGUUCCGACGACGACUAAAACAUUUACUUAU  
CUCAGACCUUCAAGAAAUAUACGACCAAGACCGUUUUGUAACUGAUGUCUCAUAUG

>EMBL\_CDS:CAM23326 CAM23326.1 Homo sapiens (human) ring finger protein 17

AUACAAGAAUCUCUUCGCUAUUAACAUUACGAGAACGAUACAAGUAUCGACGUAAGUUUAAUAA  
AAAAAAGAGAAGUUACAU

>EMBL\_CDS:CAC14920 CAC14920.1 Homo sapiens (human) solute carrier organic anion

CGCCGCGAGGUCCCUCACUACUGACACAACUACUUCGGUAAGUGUCAGUAGGGGACGUCCUAC  
GCCGGCG

>EMBL\_CDS:CAQ08463 CAQ08463.1 Homo sapiens (human) mitogen-activated protein

UGGUAGUCAACUCACGUCUCGUCGGGUAUUGUGUCUCUAAGUCAGUUUAACCCAAAGUAGACGAG  
GGGUGAGAGAACUACCA

>EMBL\_CDS:CAH73892 CAH73892.1 Homo sapiens (human) novel pseudogene

CCGACCCUCCAGCCCGUGAAAUAGGUGGACGAGAAACCAUGACCAGUAGACCUCCACCCACGUCU  
CCACCAGGUCGGUAAGGUCAACAAGUGCAGUGGUUAUCCACGUGGCCCAUGAAGAACUCGUAACCC  
UACUAGACGAAGUGGAGGUCAG

>EMBL\_CDS:CAQ10739 CAQ10739.1 Homo sapiens (human) cytochrome P450 4Z1 (CYP4Z1)

CUCUAGACGAAGUCUCUUCAGAAACCACAAAAGUGAAAACCGUGAGUUUUCUACAGGUCUUUUA  
GGACCCGAGAAAAGACUCAUCAUAGAA

>EMBL\_CDS:CAI13563 CAI13563.1 Homo sapiens (human) nuclear distribution gene C homolog

CUGUCCCAGACCCAGGUCGCCAUUAACCCGUCCAGACGGGGCAACGGAUCCAACCCGAAGUCAA  
AGGAAACAG

>EMBL\_CDS:CAQ07786 CAQ07786.1 Homo sapiens (human) thioredoxin 2 (UXN2) pseudogene

GUGACCGCAGAGUGACAACCAGAACUUUCAGUCCAGGUAGGACCUAUAAUUACCAGUAACUCCUC  
UACGACCAC

>EMBL\_CDS:CAI40867 CAI40867.1 Homo sapiens (human) DEAD/H (Asp-Glu-Ala-Asp/His) box

ACCAACCCACCGUAUUCUAGAGGACAGUAUAAAUAUUCGAGACUACCUCGUCUAAAACUGUCCUU  
CGGUAGUCCACACUAGACUGGU

>EMBL\_CDS:CAI23224 CAI23224.1 Homo sapiens (human) EGF-like-domain, multiple 9

GUCUUGAACGGACGGGUCGGUGACACCGUCUACGUGACGGUACCGACCACCGUCCAUGGCACGAC

>EMBL\_CDS:CAI12104 CAI12104.2 Homo sapiens (human) discs, large homolog 5 (Drosophila)

CCUGUCCGGACCCCCGUCUGGACGUUCCCAGGGGGUCCCUUACCGAAUACGUCUUUCCUCGACGA  
CGGAGGACCCCCGACCGAGGAAGGACAGAAGGUCGGACAGG

---

>EMBL\_CDS:CAI41410 CAI41410.1 Homo sapiens (human) interleukin 13 receptor, alpha 1  
GAGUCCUAGUGGAAGACCCCCACUCUACGUAAAAAGUUGGUUUUACGAUCCGAAGAGUGAGAGUA  
ACCACGAUGUGACCC

>EMBL\_CDS:CAH72952 CAH72952.1 Homo sapiens (human) laminin, alpha 2 (merosin, congenital  
ACGACAGUGAAACCAUCGGGACCAGUCGUCGAGCAAGUAAAAGCCAGUGCUCACAUAAGUCUAACG  
GGAGACGGUCGACUUAUUCGGAGAGACCCCGGGCGACUCCACUGUCGU

>EMBL\_CDS:CAH73851 CAH73851.1 Homo sapiens (human) KIAA1797  
AAGAACGAAGUGUUCACUACAUUUUUUAAGGAGGUUUCGACCAUUUUGGUUUCCCCUCACUCAC  
UGUUGUCAAAACUCUAUCGUUCUC

>EMBL\_CDS:CAH71812 CAH71812.1 Homo sapiens (human) mutS homolog 4 (E. coli)  
CGUCAUAAACUGUAAUAAUAAAGGUUCCACUAUUUUAAAAUUCAAAUCACUAGUGGAAACGUAU  
ACAACACAACAGACG

>EMBL\_CDS:CAI12711 CAI12711.1 Homo sapiens (human) novel protein  
CAAACUCGUCAAGAUUAUGGAAGAAGUGGCAGUACCCUGAAUUUGAAUAAAGAUUACUUUAUACA  
AAAUCUCUUACUAAUCUCCUCCAGUCUAGGUUAACGAAUUCG

>EMBL\_CDS:CAI15628 CAI15628.1 Homo sapiens (human) AUP synthase, H+ transporting,  
CACGAACUCGGAAGAAACGGUCGUCGAAAUCCAGGCGUUACGUGAACCGUUAACAGAGGAAAAGG  
ACGACACACCUCUACGAAACGUG

>EMBL\_CDS:CAH72158 CAH72158.1 Homo sapiens (human) DAB2 interacting protein  
GGAGUCCGCCAUGACCCCGGGUGGGUUAGUCCACUCCGGCUGCGGUCCCAAGGCGAACUCC

>EMBL\_CDS:CAI13226 CAI13226.2 Homo sapiens (human) chromosome 6 open reading frame 170  
CGUGGACAUCUGAAAGAAGUCUUCUCAAGUAUAAACGAGGUUAUUUCCUCAUUUUUAUUCGGGAAG  
AAGAUGUCUACG

>EMBL\_CDS:CAI13318 CAI13318.1 Homo sapiens (human) pancreatic polypeptide receptor 1  
CUCCGUGUACUCCUUCAGUCUCUCCGGUCCAACCGCUAUUCGUCCAACCAGUGCAACCGAAAGA  
GGAAGACGGAG

>EMBL\_CDS:CAC09445 CAC09445.1 Homo sapiens (human) hypothetical protein  
AACAGUUUGGUCUAAGAUUAAACGAAAAAGAAGAAGUCAUCGAACUUCGAGACCGUGAUUCUUU  
AGGAGACCAAACUAUU

>EMBL\_CDS:CAH71575 CAH71575.1 Homo sapiens (human) DEAD\H (Asp-Glu-Ala-Asp\His) box  
GACAAGGUAAGGACCCGUACUUGAAAUUGAAUUGUUGCUCAAGUUAUCGUCCCUACUCUUGUC

>EMBL\_CDS:CAQ10164 CAQ10164.1 Homo sapiens (human) actin, beta (ACUB) pseudogene  
CUCCGCAUGUCCUGGUGUUCGGACCUACCGGUGCAUAUACCGACCCACAACUCCAGAGUUU  
GUACUAGACCCAGUAGAAGAACGUCAACCGGAACACCAAGUACCCCGGAG

---

>EMBL\_CDS:CAC36039 CAC36039.1 Homo sapiens (human) oviductal glycoprotein 1, 120kDa  
GAUCUCGAUGUCACACGAAAGGUUCCCUAUGUCAAAAGGAAACAUCCCCAGUGUCAACAUGGAGAU  
C

>EMBL\_CDS:CAH73027 CAH73027.1 Homo sapiens (human) protein tyrosine phosphatase,  
CGGUUGGUGGUGGAACUACACCCUCCGUAUUACAUAAGGACACAAUAAAAGAAACCAACCA

>EMBL\_CDS:CAC09446 CAC09446.1 Homo sapiens (human) hypothetical protein  
CGACUAUCACACAGACCUAAGACGUAGACGACGUCCUUCGACCCUCGACACCGGCGUAGACGAG  
GACGUCGACUCCUAAACGUCAUUUGUCGCCCCGAUAAGUCG

>EMBL\_CDS:CAI40860 CAI40860.1 Homo sapiens (human) suppressor of fused homolog  
CACAUCGAGAAGUCACGUCUGUGGUUGCUAGACCUCCUCCAUAUGAUGGGGUUCCACAGACGU  
GCCCCGACGUA

>EMBL\_CDS:CAI23469 CAI23469.1 Homo sapiens (human) neuroblastoma breakpoint family,  
CCAACCGGUCCCUCUACCGUCAUCGAACUCAUAUUCUUAAGAGAAACUCCAGAGCCUUGACG  
ACUAACGAGAGACGGUCGA

>EMBL\_CDS:CAQ07609 CAQ07609.1 Homo sapiens (human) novel pseudogene  
GAUCCUAAAGUAGACCACGUAAAACAUUUUGGAAGUAAUUCCAAAGUGUCUCACACUAGGAUC

>EMBL\_CDS:CAQ10534 CAQ10534.1 Homo sapiens (human) solute carrier family 9 member 3  
GACCGGUCGUAGAAGUGCCACAUCACGUACCACAACCGGCUGACGAGGUUCUACAACCGGAAGUA  
CAUGAAUACUGUCGUCUACGGUGUCUUCUAUUACCGGUC

>EMBL\_CDS:CAI95313 CAI95313.1 Homo sapiens (human) KIAA2026  
AUCGACCUUACCUUUGUCUUCUACCAACCAACCGAUUUUCCACUUUCUGAUCUACAUCAUCAACAA  
GGUCGAU

>EMBL\_CDS:CAI14157 CAI14157.1 Homo sapiens (human) NHS-like 1  
CCUAGGUCGAAGAAGUAUCACGGUGAAGGAAGUCAUCUUCUUGAUCUUCUUCUUCUUCACCUGCU  
ACUCCUUUACCUAUGA

>EMBL\_CDS:CAQ10280 CAQ10280.1 Homo sapiens (human) retinoblastoma binding protein 8  
ACGGUCACCGAAGACCGACCGUCCAGAAGAUACAAUCCGAAUCACAGUAAUCUCCUUGAAAAGC  
GUUUUCUCCAGAGACCGU

>EMBL\_CDS:CAH70298 CAH70298.2 Homo sapiens (human) RAB GUPase activating protein 1  
AACGAUAAAGUCACAAACAGACUCCUAGAUUCUCAGAGUGUUAAGGAAGUCUGUGUAAGCCGUGA  
CUUCCCAUU

>EMBL\_CDS:CAB99097 CAB99097.2 Homo sapiens (human) hypothetical protein  
CGACCCCCGGAACCUCGACCGUCGACAACCCCCUCUCGAGUCCCCGACUCAGAGUGAGCGUCGGA  
GGACUCGGAGGGGUAGGGAAGAGCCGAGUCCGGAGUCA

>EMBL\_CDS:CAQ07669 CAQ07669.1 Homo sapiens (human) peroxisomal



biogenesis factor 5

CCCUCGCGGGAGAGGACUUCAGCGACGUCGGGAAGAAACUUUCCGACUCCCACUAGUGCGUCCCC  
CAAGAGGA

>EMBL\_CDS:CAH72120 CAH72120.1 Homo sapiens (human) H2.0-like homeobox  
CGCCUCCGACAACGACGACGCCGACAACGACGACGACAACAACAACGCCACUACCACCACCAUC  
CGCCGACUCUCGCCUCUGUCGGCGACG

>EMBL\_CDS:CAH74130 CAH74130.1 Homo sapiens (human) collagen type IV  
alpha 1  
CCCGGAGGUCCUUUCGGACGAACAGGAAACAGUGGUUACCCUGGUCGUCCUGGUUAUAGGACCUCC  
GGG

>EMBL\_CDS:CAH72225 CAH72225.1 Homo sapiens (human) leucine rich  
repeat containing 8  
CGUCUACAGGGUUUCCUUACAGCAAACAACAGGCGGGUAGAACCAGAACCAACCACCGACGAAG  
GUAGAAACCUACAACCACCACUGGAGCCGUAAAGGACCACCACAUACACG

>EMBL\_CDS:CAI16937 CAI16937.1 Homo sapiens (human) component of  
oligomeric golgi complex  
ACGUACUUCUGAGUUCGAUAACUUCUUAUAAAAAACGAAUCGUUUACGUAAAGAAGUUACCAUC  
AGUUAUUCGU

>EMBL\_CDS:CAI14459 CAI14459.2 Homo sapiens (human) zinc finger  
protein 318  
GACAACAGAAACCCUUAGGGUCCUUCUCCUUGGGGUAACCAUCUCCAACGGGACUCCAAGGAAGUU  
CCGUCAGAGAUGGUUAUCAGGGGAACAAAAGUUAGAGACUCCGUUUUC

>EMBL\_CDS:CAC21660 CAC21660.1 Homo sapiens (human) hypothetical  
protein  
CAGGAAGGCACGACAUCAGGCCCGUGCCGUUCCACACCCAGGAGACCACGGGAUCCAGCCCCCG  
CCGCUCAGUCUCCAAGAGGGCACGGAACCAGAUCCCGCACCUCUCCUG

>EMBL\_CDS:CAI13266 CAI13266.1 Homo sapiens (human) zinc finger and  
BUB domain  
UGUGCCCUAGAGGUCGUCCGCCCGUCGGACCUCGUGUCGACCGUACAACCGCGACGACCACCAGU  
CACA

>EMBL\_CDS:CAI14933 CAI14933.1 Homo sapiens (human) tudor domain  
containing 7  
CGGAAACGUGACCUACAGAAACUACGAAGUAAAGGUUCUCAACACACAUCGUUAUUAUCCUCUG  
UAAAGUCGUAGUCCG

>EMBL\_CDS:CAI41701 CAI41701.1 Homo sapiens (human) RNA binding motif  
protein 10  
CGGAGAGGGGUAGGGUCAUGUCCAUGACGACCGAGACUCGUAAUCAUUAUGACCCUCAACCCC  
AGUAUCAUCUCCG

>EMBL\_CDS:CAQ08432 CAQ08432.1 Homo sapiens (human) zinc finger  
protein pseudogene  
ACACUCAUGAGACUACUUGUUCUCCAACCUAACAGUCUUUCCGAGAAUCAACAAGUAAUUA  
AGUGU

>EMBL\_CDS:CAH70855 CAH70855.2 Homo sapiens (human) ribosomal protein  
L12 (RPL12)

GGACUCCCGAAACUACUAGUCCCGUCUCCGUCUCCGUGGAGUUAGACCCGGACAGACAAGA  
CUUACCAGUCAAGUGACAUAUAGGAGUCC

>EMBL\_CDS:CAH71826 CAH71826.1 Homo sapiens (human) FRAS1 related  
extracellular matrix 1  
CGGACCUCUUAUGUCAUUGUCCAACGGGUCCAUAACAAGGGACGUUCGAACCCGUCGGCGUAAG  
GUCCA

>EMBL\_CDS:CAH74069 CAH74069.1 Homo sapiens (human) pseudogene similar  
to part of NADH  
GUCUUUUUAACUCGAACAAUACUAAUAAGGAGUAUCCCUAUCAUACUCCCUCCUUAUUCGAUUAU  
UGAGAC

>EMBL\_CDS:CAI14932 CAI14932.1 Homo sapiens (human) amylase, alpha 1C  
(salivary)  
CCAACCAUAGAAAGGGUGGUUCCAGACUUUCCCAACACUUAACCGUUGUAAAAGUAAAACCACCUCU  
CUGGACUUGG

>EMBL\_CDS:CAI13272 CAI13272.1 Homo sapiens (human) DC-SUAMP domain  
containing 1  
UCGUGGUGGUCGUCGUCGUCUUAACCCGUCACAGAGGUCCUCGAGGGAGUGGUGUACGAGUAAAG  
ACUCCGGACCUACCACCCGA

>EMBL\_CDS:CAH71185 CAH71185.1 Homo sapiens (human) CDC42 binding  
protein kinase alpha  
UCAUGCAGACGGAAACGAUCCGACCUCAUGUCCUACCUCUCGCAAGUUUAACUAGGUCUCGUAGCC  
AUCCGCAUAA

>EMBL\_CDS:CAI14348 CAI14348.1 Homo sapiens (human) chromosome 9 open  
reading frame 126  
AAGUCGUUCCGCUAAGCUACACUAUUGUUACCAUAAUAGUAGUAAAUAUGGUAAAUGUCCUAGGC  
GGAGUUACUU

>EMBL\_CDS:CAI14438 CAI14438.1 Homo sapiens (human) surfactant,  
pulmonary-associated  
ACCUGAAGGGACCCUGGGUACCGAGGUCGUCUGGGACGACGGGGACACAAAGGUCCUGAGGU

>EMBL\_CDS:CAC21674 CAC21674.1 Homo sapiens (human) hypothetical  
protein  
GACGGACCAGGUCUCCAAGACGCCAGGUGUCGACCUUUUCCCGAGGUGCCCGGCCAGUC

>EMBL\_CDS:CAI14538 CAI14538.1 Homo sapiens (human) human  
immunodeficiency virus type I  
UACCCUUUGCAACCCCGAGACGAGACUCCGACUGGAGGCGUAGAGAGCCCGUACACCCACCACCG  
ACCCUGUCAGUUGUACACCCACGGGUCCCCAAACCCCGGUACAGUCUACUCCUGACCCCGG  
AGCCGAAAGGGUA

>EMBL\_CDS:CAI14682 CAI14682.1 Homo sapiens (human) serine/arginine  
repetitive matrix 1  
UCUUCUCUGGCAGCGGAAGACCACCACCACCCCUACCUGAAGAGGAGGCAGAUGGUGCUCUCC  
UUCAGAGAAAAA

>EMBL\_CDS:CAH70858 CAH70858.1 Homo sapiens (human) spen homolog,  
transcriptional regulator  
CCCCAGUCGUUCGAAGAACAACACCACUGUUACGAACCCACUCCUGGUCGACCAACACUUGGU

CGUGUCCCCCACACAACUAGGG

>EMBL\_CDS:CAI15846 CAI15846.1 Homo sapiens (human) CD52 molecule  
UCGUCUUCUCCACCUAUACCGUAACCGGUGUCUUCUUUCCUUUUACGGAGGCGAAUACAACGA

>EMBL\_CDS:CAH74000 CAH74000.1 Homo sapiens (human) tudor domain  
containing 3  
CUACUAAGAUCAUAAAAAAGACCGAAUUAACCGGGUCUAGAAGCAAACCCGGGUGAUACAUUUU  
AUAAAAUAGUAG

>EMBL\_CDS:CAD13322 CAD13322.2 Homo sapiens (human)  
gamma-aminobutyric acid (GABA) B  
CCAGCUCCUUCAUCCCCGCGUCCUCACUGAGCAACGCCUAGACGAGCUACCGGUCAAGGUGCCGC  
CCCUCGUGUGGCGGGCUACGACGGGAACCGG

>EMBL\_CDS:CAQ07191 CAQ07191.1 Homo sapiens (human) novel pseudogene  
GUAAAAGAACUAGGAACAUCUCCCCUAGAAUAACUCCCCUCUUUAUGGAAACCAUAAUCUAUGU  
UGUCCUAGACUUUAUC

>EMBL\_CDS:CAQ09904 CAQ09904.1 Homo sapiens (human) diacylglycerol  
kinase pseudogene  
CCCAGGUCCUAUUAUUUAGAGUAGGACACGCUAGAGUCAGUGUAUCAACUCCACGAGGACCCGAG

>EMBL\_CDS:CAI10965 CAI10965.1 Homo sapiens (human) solute carrier  
family 31 (copper  
UGGUGGACCUACUACACGUCGUGACAAACGUCCUCCACUCCUUUCGAGUCGUAGACAACGGGUUG  
UCAAAAACACACAGAGGUUAUCCUACCA

>EMBL\_CDS:CAI14296 CAI14296.1 Homo sapiens (human) eyes absent  
homolog 3 (Drosophila)  
UAGUAAAAGAAGGUAACAAUUUGGACUCGGUUAGUGACAACCCAGGAAAGGUUAUAAAGACCCG  
UAUCCUAGGUCAUUCUUCACUCACCUUCUACUACUA

>EMBL\_CDS:CAI22608 CAI22608.1 Homo sapiens (human) MORN repeat  
containing 1  
GACACGGCACCCACCACAGGGGGACCCACGUCCGGCGGAGACCUAGACGGCGGACGGAAGAACA  
CCUCCGACAGGUCCUUGUCCUCCCCACCAUGGGUCCGCCCCCGCGGGGUCCUCCUGUAGACAC  
UUGAGCCGUGUC

>EMBL\_CDS:CAH73652 CAH73652.1 Homo sapiens (human) olfactory receptor,  
family 10,  
CUCUUUUUGGUGUUUCUCUCACUACACUACAAACACCUUAGACCUCUUAGGGUCCUUUUGUUUGA  
GACAAUGGAGACACUCCAAGAAAGAA

>EMBL\_CDS:CA072141 CA072141.1 Homo sapiens (human) chromosome 1 open  
reading frame  
CAGGCCGCCUUUCCACAGGUCCUUUCCAGAACCCAGGCUGUCACUUCUGAAGUCACCCGAGGC  
CCGGCGUGGACCCGAGGGCGGGCGGCCCG

>EMBL\_CDS:CAQ08914 CAQ08914.1 Homo sapiens (human) actin related  
protein 2/3 complex,  
AUUAUAGUUCAGGACAGUCGAAGUAAGAAUUAAGUAUCAAAAACUUCUUCUGUAACCGGAACUU  
CAU

>EMBL\_CDS:CAI13832 CAI13832.1 Homo sapiens (human) CDKN1A interacting  
zinc finger

---

CCCCGCCCCUGUCCACAGUCCCCAUGUCACGAUUUCCGGGCCGACAGUGACGAGACGUCUUACC  
ACUGGAAGUCCCUCGGGGGCCGCGGGGUAUGGGGACCGUAGAGAGAGCGAGA  
>EMBL\_CDS:CAI41249 CAI41249.1 Homo sapiens (human) immunoglobulin  
superfamily, member  
UAUCAUUUUUGUCUCCAUUACAGGUCAUAGAACCUAGAAGUUUCUGACCUUCUUCUUAACGGA  
GUAAAAAAUAACA  
>EMBL\_CDS:CAI12482 CAI12482.1 Homo sapiens (human) v-ski sarcoma  
viral oncogene homolog  
GCGUCGAAGAGGAAGAACCGGUGCGCAUCCUUGAGGUCGAGGACCACCUCGACGCGAACCGGAC  
GUCCCCGACGC  
>EMBL\_CDS:CAI12125 CAI12125.1 Homo sapiens (human) heparan sulfate  
proteoglycan 2  
CUGGUCACCUACCACCCGCGCCCCGACGGACACCGACUCGUCGCGUCCACCGGCACACAGGUCG  
GAGGUGUCAG  
>EMBL\_CDS:CAI15178 CAI15178.2 Homo sapiens (human) ribosomal protein  
S24 (RPS24)  
CACUUCUGUAGAUGCUGACAAACACGAGGGACUCCAUCAACUAACCAGUACUUGAAGGAUCAUG  
UUUAUCAUAACACAGUAAGUA  
>EMBL\_CDS:CAI12649 CAI12649.1 Homo sapiens (human) myotubularin  
related protein 11  
UGGGACCGGUCGGAACGAGUCCAAUAGGGGCUUAUGACAACCCGAACUAACGAGACUCGAGACC  
GAACCUUUACCGGUACCA  
>EMBL\_CDS:CAI12547 CAI12547.1 Homo sapiens (human) aryl hydrocarbon  
receptor (AHR)  
UACCUUAGGAUAAAACUCGAUUAAACCAUCGUCUCAUAAAAGGUCAUCACGAUGAUAAUCAGGA  
GUAAUCAUUCUCAAGGUA  
>EMBL\_CDS:CAI14505 CAI14505.1 Homo sapiens (human) chromosome 9 open  
reading frame 50  
CCGGAAGAAGGUACUUGUCUCCCCGUCCGACGACAAGUACCUCCACAGGAGUCUUUCAUCGGGA  
CACAGAAGACCCACCUGUCCGG  
>EMBL\_CDS:CAI17060 CAI17060.2 Homo sapiens (human) pseudogene similar  
to part of NADH  
UCCCAAAUUAUGACAAUUAUACGUACAUGUACAAGGAGCAACUAACACUGUUCAUUAUJUCC  
CUUAUUUCCCGACACCAAUUAUUAUUCAGGA  
>EMBL\_CDS:CAH73128 CAH73128.2 Homo sapiens (human) protein tyrosine  
phosphatase,  
UCGGUCUGCCUUUAUCAUAUUCGACAAACCAAAGUCAGGAACGUCGGAUAUACUACAGGGACCGA  
>EMBL\_CDS:CAQ10461 CAQ10461.1 Homo sapiens (human) NADH dehydrogenase  
5 (MUND5)  
AGGAUCAUAAAUCUCUUAACUACAGACAUUACCCUUGGAAUCAAUUCUAAUAAUCAUACU  
CUAAUUCGAGUAACGAUCCU  
>EMBL\_CDS:CAI40039 CAI40039.1 Homo sapiens (human) chromosome X open  
reading frame 59  
GUCAAAAGACGACAACGUCAUUGACCUUCACUUUUGUGGUCAAAAAAGACAGUAGUGUCUUUUCU

UCUAAC

>EMBL\_CDS:CAQ11044 CAQ11044.1 Homo sapiens (human) mitochondrial AUP synthase 6

CGGUUACUGAGAAAACAAAACACCACCUUCAGUCACUAUUGACGAGAACCAAUAUCACCCUAUAG  
AUAUAAAUCUAAAUAACUAUUGACUCAUAACCG

>EMBL\_CDS:CAI41100 CAI41100.1 Homo sapiens (human) melanoma antigen family H, 1

AACGGGUACUACUUCUACUCGCGAUUAUAUCUGUAGUCCUCUGAAAAGAACCACGGGACUUUUA  
CGAGGCCCCGUGACUUCGAAAACACGAACCCGUCACGAGCUCCGAAGAAGUCCCCACC

>EMBL\_CDS:CAH74086 CAH74086.1 Homo sapiens (human) hematopoietically expressed

AACCUCUAGAGUGGACCGGCGGAAAGGAAAUAACGUCUCCGAGACGUUCUCCCCGAGGUCUC  
AUCUCCAAACGGGUC

>EMBL\_CDS:CAH73166 CAH73166.1 Homo sapiens (human) peptidyl arginine deiminase, type

CCUCCUGUUCAAACACCAGUAGUUCUCCCGACGUCCCGGACGCAGGCGUCCUGGUACUGUCUG  
UACAGAAGG

>EMBL\_CDS:CAQ06495 CAQ06495.1 Homo sapiens (human) UAF1 RNA polymerase II, UUA box

GACCCACUACUUUACCGGUUCUAGACCUUGACGGUAGUAAAAGACCCACUGUUACAACAGGUCU  
UACUUUCUUUACGGUGAACCAGUAGUAGUAGGUC

>EMBL\_CDS:CAH73905 CAH73905.1 Homo sapiens (human) novel tudor domain containing protein

GGGACAAGAACUAAGCAGUUCUAGAGUUAUUGUAUAACUACUAGGACAAAUAGUUCUUAUACC

>EMBL\_CDS:CAI17217 CAI17217.1 Homo sapiens (human) tetratricopeptide repeat domain 13

UUGAAAGACGAAGUUUCGAAGAAACUCCUAAGUUAUCGAAGGAAGUCUUCAGGAGACACUUUCU  
UUCAA

>EMBL\_CDS:CAI40666 CAI40666.1 Homo sapiens (human) novel protein  
ACACCCAUGUCCGGCCCGACCACGGGAGGU AUGCCGCCGACAGGGCUCUCCCGGAACCGGACC  
UAUGACGACGGGUAU

>EMBL\_CDS:CAQ06806 CAQ06806.1 Homo sapiens (human) nicolin 1 (NICN1) pseudogene

ACCUCUCACGUCCAACGAGUGUCCCGUGACCCACCCUCUCGGUGAACCCUUCUAGUACCUCUCC  
CGAGAAACCAGGGACGACUAUCUAGACGUCGAGGAGGU

>EMBL\_CDS:CAQ10659 CAQ10659.1 Homo sapiens (human) novel pseudogene  
CAGUUCGGAAGGAAUUUCGAUACUACAUAACUAGAAGUCGUUUUUAGACCUUAACUUCUCCAA  
ACUA

>EMBL\_CDS:CAM13086 CAM13086.1 Homo sapiens (human) ADAMUS-like 1  
CCGAAGUCCUCGCACAGGACCACGAGGUCCACCGACGCCUUCUAGAGGACCCGGUCGACCCGGUG  
GUCCACGAACGACAUCUCCAG

>EMBL\_CDS:CAI12265 CAI12265.1 Homo sapiens (human) adipose differentiation-related

AAGACGUCGACGGGGAACGAUCUUCACUCCUCCGACAGUCUGUGAAGAAAUUUCCUCCGUCGUAA

CGCCUU

>EMBL\_CDS:CAH70693 CAH70693.1 Homo sapiens (human) stathmin-like 2 (SUMN2) pseudogene  
GGGUGGAGCCGGAGGGUUUCACGACCCUAAUGUCCGCACUCGGUGACACGGGUCGGACUAAACGA  
AGUGAAAGUAAAGUUAAUUCUAUUCUACAACUACAACGUUCUAAGGUCCAUUUUUGUUCUGUCC  
CGGUGUGGACCACCAAGUGUGGAUUAAGAUCGCGUAAACUCUCCGACUCCACCC

>EMBL\_CDS:CAI15376 CAI15376.1 Homo sapiens (human) poliovirus receptor-related 4  
CGACACGAGUCACCAGUCACCCCUUUCGGGUUUCACAGGGGUAGGUGAGCAUGGGGUGACCCGU  
CUCCGGGUAGGUCGGCACAGGUCAACAUACUCCUCCCCGACGGGAAGUGAGUCCGUGAACUCG  
UAUCG

>EMBL\_CDS:CAI13541 CAI13541.1 Homo sapiens (human) dual-specificity  
GACAAGAUGGAAGUAGAGUGGAGGUAGGUUUUUCACGACUCAUACUAGAGGACAUUUGACGAGUC  
ACCAGUAUAAAUCAGAAGACCCACCUCCACCAAGUCUUCUUAACGUC

>EMBL\_CDS:CAH70273 CAH70273.1 Homo sapiens (human) pseudogene similar to part of  
AACUGUGUCCACAAAGUUACCACAACUUCUCUUUAAGGGAAAGAAACCGUAGAAAAUACAUUCA  
CAGUU

>EMBL\_CDS:CAI40469 CAI40469.1 Homo sapiens (human) melanoma inhibitory activity family,  
UCGAAACCGUCGAACAUCACUCAACGCCAGUAGAAGGUUAAAAGAAAUGGACCAGAAGGUCCAUG  
UAAAUCACCGUGGCCUCCGAGAAUCGAAUUCGACAUUUUCGA

>EMBL\_CDS:CAI16384 CAI16384.1 Homo sapiens (human) tropomodulin 4 (muscle)  
GUCACACAUGUACAGGUCUUAACGACGUUACAGUGUGUAAAAGUCGUAGACACCGUACACGGUCAC

>EMBL\_CDS:CAI16380 CAI16380.1 Homo sapiens (human) LysM, putative  
AGGAGAGGUAGAAAGAGAAGGAGUCUCAGGUUUGGUAACUUGUCCAGAGACCCGAGACAGUCCUA  
CCCCUACAUCUCCC

>EMBL\_CDS:CAI13935 CAI13935.1 Homo sapiens (human) small nuclear RNA activating  
CCCCUAGCCGUCCUAGGUUCAGGAGUCUCCGUCACUUAGACGAAGUCUUAGACUGAGCUCUGAA  
CUAAGACUCUAGAGG

>EMBL\_CDS:CAI39693 CAI39693.1 Homo sapiens (human) novel (FLJ20483) pseudogene  
ACGGUAUAAAAAUUUCACAACAGACACAAAAGAAUCUCCGUAAGGACGAGCUUUUCUACACCAU

>EMBL\_CDS:CAI39581 CAI39581.1 Homo sapiens (human) HECU, UBA and WWE domain containing 1  
CCGAGAAGAUCCUAAGGAGCCCUUAGACGAGGUCUUUACCGGUGCCGUCUUAGAGACCACCUUCU  
CGA

>EMBL\_CDS:CAI16184 CAI16184.1 Homo sapiens (human) cholinergic receptor, nicotinic,  
GGUGUAGACCCUCGGUCUACACAAACCUUCCUCGGCUUGAAAGAAGUACAACAGUUUGAGAAGU  
CCGAAGGUCCACUCC

>EMBL\_CDS:CAI13006 CAI13006.1 Homo sapiens (human) polo-like kinase

3 (Drosophila)

CCACUCGACAGAAGUCCACGACAGAGAUGGUCCGACUGUCCCCGACCCGGUCUUCGACGACCUCG  
GAGACCGGACCGUAGGACUACCGGUUGCCUACACGCGUACUCCGGCGAGUGG

>EMBL\_CDS:CAH69928 CAH69928.1 Homo sapiens (human) inositol  
polyphosphate-5-phosphatase,

GUGACUCGACUGUCCGAACACCAGUGACCAGAAGUCCCGGUACACCGAGACCAUUGAGUCGACUC  
AC

>EMBL\_CDS:CAI40037 CAI40037.1 Homo sapiens (human) cylicin, basic  
protein of sperm

AAGUCACAAACAGAAGAACC UU AAGAAACUUAGAAAGAAUAGAAAAACACUUGUUAAAAAACUCU  
GACAGAAUCUUAAAACCCUAAGACCUAAUCAAAGACUU

>EMBL\_CDS:CAI18907 CAI18907.1 Homo sapiens (human) carnitine  
palmitoyltransferase II

AGUACCACCGUAGUUUGAAAAGGAAUCGUCGACACUACGGUCAGAAAUCCGUAGUCAGUCGAGC  
UUCAACUCAAGACGUGGCACU

>EMBL\_CDS:CAQ09180 CAQ09180.1 Homo sapiens (human) mitochondrially  
encoded cytochrome

UGUUUAUCCUUAAAAGUAACCCUCUUAUGAGCUAACAGUUGAAACUCCUCAGCAUCAAGAGGACC  
AAAAUUCAGACAACA

>EMBL\_CDS:CAI18063 CAI18063.2 Homo sapiens (human) collagen type XI  
alpha 2

AGGACCCCCUGGAACACCCGGUAGUCGCGGUAACCCAGGUCGACCUGGAGCUCCAGGACCCCCCG  
GUCCACCAGGGUAUCCU

>EMBL\_CDS:CAI16169 CAI16169.1 Homo sapiens (human) potassium large  
conductance

AUCAAGUCACUACUACCCCUACAACUGGGGUCAACACUACCUACCAACUGCAUUGUAGGGCACGU  
GACCCGAC

>EMBL\_CDS:CAI17779 CAI17779.1 Homo sapiens (human) HLA complex group  
4 pseudogene 5

CUUCCGCCACAUACCUAACCCUCAGGGUCGGAACCCUAAGGGGUUGAGGCGUCAAGAAA

>EMBL\_CDS:CAI17611 CAI17611.2 Homo sapiens (human) collagen, type XI,  
alpha 2

UCCUGGGAAGAGAGGUACUCCCGGCUACCGUGGGACCCCGGGCCCUUCUGGGACCCAGGGUCCCC  
ACGGGACAACAGGUCCUCCAGGA

>EMBL\_CDS:CAI18234 CAI18234.1 Homo sapiens (human) poly(A) binding  
protein interacting

UACGAAGAACCAUUAGGCCUAGUCGACGUCACUUUCCUUGUGAUACUUUGUGUUUAUUGAUACACU  
UACUGGUGAUUUUUACAACCAAGUAAGUGUAUCAUUAACCCUAGAAAAAACCGACAACAUAAG  
ACAUACUACUUCAACGUA

>EMBL\_CDS:CAI10948 CAI10948.1 Homo sapiens (human) jumonji domain  
containing 1C

CGGUUCCAUGAACUCAAAAGGACUCGGUGGAAAAGAUUUAAUCACAGUAAACAUAUAGUUAAU  
GUGUAAAACCACCCACCAGACCUAUGUUUGAAGAGGAAAACCA

>EMBL\_CDS:CAI95083 CAI95083.1 Homo sapiens (human) tripartite

motif-containing 46

GGAGCGAAGGAGGGUCCCAUACAGGGUUUCGGACUGAAUUCGUCGGCCAGGUCCGCCAGACCGAA  
CCCCUCUCAAGACGCCUCUCCGCCCC

>EMBL\_CDS:CAI40878 CAI40878.1 Homo sapiens (human) potassium large  
conductance

AAAGACGGUACACAGAAGGAGUUAGAAUACUUACUGGAGUACCUCUUCUCCAACCGUUCGUACC  
ACCUCU

>EMBL\_CDS:CAD38974 CAD38974.2 Homo sapiens (human) hypothetical  
protein

AGCUCUAGAUCUUGGUCUAGAUCUAGCGGAGGAAAAACCACUGGACCUACGACUGGAUCUAGAAC  
U

>EMBL\_CDS:CAI18078 CAI18078.1 Homo sapiens (human) tenascin XB  
GUCGGUGUCGGUCACCUUCCCCGUCCAAUUACGCCACCCACUUAUGGUGGACGAAAGAGGGGAGG  
AAGGUGACACACGAGCAUUUCGAC

>EMBL\_CDS:CAD38738 CAD38738.1 Homo sapiens (human) hypothetical  
protein

CACCGACCCCCGUCGGUCCUGUGGAGGAGGAAACCCCAGACGUCAAAGGUCGACCGUCCGGCC  
GACUGUCUGACGACCAAGAACUACCCUCCGUCACAGAACAUGAAGGAGCGUCCAAGUG

>EMBL\_CDS:CAD39100 CAD39100.1 Homo sapiens (human) hypothetical  
protein

UCCCGUCACCCCCAUUGAGACGUAAACCCGGUACCCCCGGGUUCUCGUGAGACAGGAGGUGCCGA  
CGAGA

>EMBL\_CDS:CAD38978 CAD38978.2 Homo sapiens (human) hypothetical  
protein

CCACGUCGAACUACACCGUAGACCCGGGUCACGGGAGUUCACGGUGGUAGAGUCCGACGCGA

>EMBL\_CDS:CAD38583 CAD38583.1 Homo sapiens (human) hypothetical  
protein

CUCAGUCUAAGACGUAGUCUAAGACUCAGUCCAAGACUAACCGUAAGCCUAAACCCAAGACUGAG  
ACUAAGACUAAGCCUAAGACCGAG

>EMBL\_CDS:CAD89960 CAD89960.1 Homo sapiens (human) hypothetical  
protein

CGAACAUCCCGUUUCUCUCUCCGACGUAGACACCGACAGAGUCUACCCCGAACACAAUAACCGGA  
AUUCA

>EMBL\_CDS:CAD38951 CAD38951.1 Homo sapiens (human) hypothetical  
protein

CCGCCCCUAGACGAGUAUCUGGUCGAGUUUCCGGCAGUCGGCCCCGAGGGACCAACAUCCCGGCC  
AGAGCUCGUGUCAGGGCGG

>EMBL\_CDS:CAD39091 CAD39091.1 Homo sapiens (human) hypothetical  
protein

CCAUGAGAUCAAUCUUUACCCGACC UAAAAACUCCGUGUCUUAAGUCGAGACAAGGUUGUAAUCU  
CCCGG

>EMBL\_CDS:CAD89901 CAD89901.1 Homo sapiens (human) hypothetical  
protein

CGAGUUAGAAGAGGUCUUUCGUUGGAGGGUACAUCCUCGUGACGACCCUCCCGUCAACUUUGAC



CUUUACCCUAACUACG  
>EMBL\_CDS:CAD39157 CAD39157.1 Homo sapiens (human) hypothetical protein  
ACCUCACGAACCAGGGUUCGUCGAAGAGAAUGUCCUCCACUCCCUCGACACUCGGUAGAGGU  
>EMBL\_CDS:CAH74027 CAH74027.1 Homo sapiens (human) laminin receptor 1 (ribosomal)  
UCUCGUCCGACGACGAUUUUUUCGACUCCGAUUCUCCUUAAGUCCCACUCCCUGACGGGACC  
GAGGACUCACAUGACGAUGAGUCGGACUCCAACGUCGGACGAAA  
>EMBL\_CDS:CAH10602 CAH10602.1 Homo sapiens (human) hypothetical protein  
CGGCCCGACGUCGUCCACUCUUCACGUCCUCGACCCUCAACGACGGUGACGGUCGUCGUCGUCG  
UGGUCGUGGACGUCACCGUUACCGCCCCGACACCG  
>EMBL\_CDS:CAD39047 CAD39047.1 Homo sapiens (human) hypothetical protein  
UACCGAAAAGAGACUCCCUGACACUACAGAAGAGAGUCUCCCUGACGCUACAGAAGAGAGUCUCC  
CUGACGUUACCGAAGAGAGUCUCCCUGACGUUACCGAAGAGAGUCUCCCUGACACUACAGAAGAG  
AGUCUCCCUGACACUA  
>EMBL\_CDS:CAD91151 CAD91151.1 Homo sapiens (human) hypothetical protein  
AGACGGUAGACCCGAAAGUACCGGAGGAACCGGAAGGAAUGUCGGUCGUUCGAGUGGAGGUAGAC  
CAGUGGGUUCACGGCCUACGACCGGACGAGCCGGAGGUCCUCCGGUUCUCCGGACCUACCGAC  
U  
>EMBL\_CDS:CAM25754 CAM25754.1 Homo sapiens (human) HLA complex group 22  
AGUGACGACACUGACUUAUCAAGUGUCUCCACUCACAGUGGUACAAAUCACCAAAGUAGAAGA  
CACCAGGGACCCAGACGUCACU  
>EMBL\_CDS:CAD38816 CAD38816.2 Homo sapiens (human) hypothetical protein  
ACUUCACCCGCCGGUCUCCCCGACAACACGGCCGAGUGGGACGUCCCUGUCCGUCGGUGCCACCGC  
AUCAAGU  
>EMBL\_CDS:CAD38604 CAD38604.1 Homo sapiens (human) hypothetical protein  
UCGUCGUAGAAAAAGAAGUCUGAACCCUCGACCACGGUGGUGUCGGGGCAGACUUCUCCCACGA  
GGA  
>EMBL\_CDS:CAD38784 CAD38784.1 Homo sapiens (human) hypothetical protein  
CGAAACAGAAGGUCCUCGAUUUUUCCAGAAAGACCAACUGAUUUUUUAUAGAGGACCUCUUUUUC  
CA  
>EMBL\_CDS:CAH10604 CAH10604.1 Homo sapiens (human) hypothetical protein  
GACUUUUUAGGAGAAAACCCUCUACUGAAUCUAACACAUUCACCGUUUCUUUCAACAGCAACUAC  
AAACUUCGCGUAAGGAAAGGCAACCGGAAACAGGUCAAAACCGAAAAGGUGUAUUUCUCCCCAAA  
ACUC  
>EMBL\_CDS:CAD38994 CAD38994.1 Homo sapiens (human) hypothetical

protein

GGGACGACCAGACCUGUUACGGGUGUCACCGGUCAUCCGGCGUCGUACCAUAAGAUUCACCGACC  
CUCCGGUCCUCCACCCCGAAUGCGACACACGUCUUCUCAGGUCAGGUCGGUCCC

>EMBL\_CDS:CAI18564 CAI18564.1 Homo sapiens (human) Notch homolog 4  
(Drosophila)

GAAGACGGGAGUGUGGGGAACCGAGGCCCAAAGACUGUGGCCCCGGGACCUCUCGACACUCCCGU  
CCUC

>EMBL\_CDS:CAM25804 CAM25804.1 Homo sapiens (human) collagen, type XI,  
alpha 2

CAGGUCCUCCAGGACCGAGAGGGACCCAGGGUUCGAGGGAAACCCGGGACCCUCCUGUAGGUAC  
GGAGCCUG

>EMBL\_CDS:CAQ10080 CAQ10080.1 Homo sapiens (human) zinc finger  
protein pseudogene

UAUUACUUAUUCUGAAUCGGAGAUUAACUCCGAAUAAGUAAUGUCCAUGUCUCACAGACAGGUG  
AUACUUAGACGUCUACUACUUGUCCUAAACUAAAGACAAACCUCCAAAAACAUAUAAGUAACA

>EMBL\_CDS:CAQ09244 CAQ09244.1 Homo sapiens (human) mitochondrial  
ribosomal protein

AACUCUAACCACCUCACCUGGAAGAGUAAUGAGUAGUAGAUCUCCUCCAGGAGUAGUAGAGAUG  
AAGAGUU

>EMBL\_CDS:CAH71081 CAH71081.1 Homo sapiens (human) rearranged L-myc  
fusion

ACGUAUCAAGUCUCACUAGAUCACACAGUUAUUCGAGAAGUAAGUAACUUCGACUUCUCGAUAC  
UGAAUUGACUAGUGAUCUUAUUGACAGU

>EMBL\_CDS:CAJ20055 CAJ20055.1 Homo sapiens (human) Cox18Hs1 protein  
AAGGUGGAACCGGUCCUACAUCACGACCAUCCGACGGUUUCCGUCGCACUGUCGUGGGGCAUCC  
GGUGCCACCUC

>EMBL\_CDS:CAL06519 CAL06519.1 Homo sapiens (human) immunoglobulin  
heavy chain variable

AGUCCGACCAGUAAACGUUUUUGUCGCACCUGAACCUUAACAGAGACCUCUACCACUUGGCCGGG  
AAGUGCCUCAGACGCAUCAUACACGAUACUGGUCAUACU

>EMBL\_CDS:CAJ57189 CAJ57189.1 Homo sapiens (human) immunoglobulin  
variable kappa

AAUCCUCGAAUCCUCGAAAGGGACCAAAGACGACUAUGGUCCGAUUUCGUGAUGAUUACGGGACU

>EMBL\_CDS:CAJ84703 CAJ84703.1 Homo sapiens (human) cytochrome P450  
1A1

GCACGAAUAGUCCUGGAGUCGGAGGAACGAGUGUACGAGAAGGUCCAUCGUCCUCCAACUCCUCC  
GACCCAGUCUCCGUUAC

>EMBL\_CDS:CAJ75539 CAJ75539.1 Homo sapiens (human) immunoglobulin  
lambda light chain

CGAAGACGACCCUGGUCGAACCUAUCAGUAAUAACCACUGACGAGGUCACGACCUUCGUGUCCA

>EMBL\_CDS:CAJ75485 CAJ75485.1 Homo sapiens (human) immunoglobulin  
heavy chain

CACGAAGUGCACCGUACAGUGCCUGAACGGCCGAUCCGUGACACACCGGCCGUCCAGUCGACCG  
ACGAGCACCACAUG

---

>EMBL\_CDS:CAK50629 CAK50629.1 Homo sapiens (human) immunoglobulin A heavy chain

CCAGGUACAUCGACACCAACGCCUACACAGGGACCAUUCCCACUGAGACGGGACCUUAAAGACA  
CUUAUAAAACACAGUGGUGACGGUCGCACCUAG

>EMBL\_CDS:CAK50713 CAK50713.1 Homo sapiens (human) immunoglobulin A heavy chain

GUCCAGUCACACUCCCAGACACACCCGAAGUCACGACACCCUGGUCUGGGAGCUCCAACUGGAC

>EMBL\_CDS:CAM34545 CAM34545.1 Homo sapiens (human) autogenous vein graft remodeling

CGCGGGUGGUGGUGCGGGUCGAUUAACAAAACAUAACAAACUCUACCCAAAGGACACAAUCGG  
UCCUACCAGAGCUAGAGGACUGGAACACUGAUGUGCCACUUGAGACGGAGAUGAUUUUUAUGUU  
UUUUAUCGGCCCGCACCACCACCCGCG

>EMBL\_CDS:CAQ37746 CAQ37746.1 Homo sapiens (human) putative ankyrin repeat and sterile

AUCCCUCGGUGGUCACCACAUCACGAAACCGAUUCACUACCUCUGUUGACUCCUCCUCACACUA  
AUGGUGACCCAAGGGAC

>EMBL\_CDS:BAA95561 BAA95561.1 Homo sapiens (human) liver-type 1-phosphofructokinase

GAGGAACCCCCGAAGACCACCCGCUCCUCGAACAUUACAAGGUCAACAAGAGCUUCGAGGGUG  
GUGCCUC
